# Supplementary material
Source: PubMed Central journal article supplement (PMC2949476)
Supplement: NIHMS232210-supplement-01.pdf [file NIHMS232210-supplement-01.pdf]

**Table SI. Complete list of peptide sequences and proteins identified in combined experiments.<sup>a</sup>**

| FBgn no. <sup>b</sup> | m/z <sup>c</sup> | Score <sup>d</sup> | $\Sigma$ Hits <sup>e</sup> | Sequence <sup>f</sup>   | Age (days) <sup>g</sup> | Experiment <sup>h</sup> |
|-----------------------|------------------|--------------------|----------------------------|-------------------------|-------------------------|-------------------------|
| FBgn0000055           | 604.9            | 60                 | 3                          | AAVVNFTSSLAK            | 2d                      | 18                      |
| FBgn0000055           | 679.28           | 71                 | 5                          | AIELNQNGAIWK            | 2d                      | 18                      |
| FBgn0000055           | 585.08           | 61                 | 4                          | IENPAAIAELK             | 2d                      | 18                      |
| FBgn0000055           | 998.93           | 61                 | 4                          | LLAHPTQPSLACAENFVK      | 2d                      | 18                      |
| FBgn0000055           | 831.56           | 50                 | 2                          | NVIFVAGLGGIGLDTSK       | 2d                      | 18                      |
| FBgn0000055           | 1229.22          | 104                | 6                          | TIAVNYTGLVNTTTAILDFWDK  | 2d                      | 18                      |
| FBgn0000055           | 1307.04          | 80                 | 6                          | TIAVNYTGLVNTTTAILDFWDKR | 2d                      | 18                      |
| FBgn0000055           | 1158.26          | 88                 | 6                          | TTLVHTFNSWLDVEPQVAEK    | 2d                      | 18                      |
| FBgn0000055           | 1040.02          | 102                | 5                          | TVDVLINGAGILDDHQIER     | 2d                      | 18                      |
| FBgn0000055           | 1072.97          | 44                 | 3                          | VTVTFYPYDVTVPPIAETTK    | 2d                      | 18                      |
| FBgn0000055           | 604.63           | 56                 | 3                          | AAVVNFTSSLAK            | 22d                     | 18                      |
| FBgn0000055           | 678.74           | 77                 | 5                          | AIELNQNGAIWK            | 22d                     | 18                      |
| FBgn0000055           | 585.47           | 68                 | 5                          | IENPAAIAELK             | 22d                     | 18                      |
| FBgn0000055           | 874.95           | 34                 | 1                          | KGGPGGIICNIGSVTFGN      | 22d                     | 18                      |
| FBgn0000055           | 999.03           | 67                 | 3                          | LLAHPTQPSLACAENFVK      | 22d                     | 18                      |
| FBgn0000055           | 831.5            | 55                 | 2                          | NVIFVAGLGGIGLDTSK       | 22d                     | 18                      |
| FBgn0000055           | 1157.96          | 81                 | 6                          | TTLVHTFNSWLDVEPQVAEK    | 22d                     | 18                      |
| FBgn0000055           | 1040.04          | 114                | 6                          | TVDVLINGAGILDDHQIER     | 22d                     | 18                      |
| FBgn0000055           | 1072.09          | 60                 | 2                          | VTVTFYPYDVTVPPIAETTK    | 22d                     | 18                      |
| FBgn0000055           | 604.78           | 47                 | 2                          | AAVVNFTSSLAK            | 42d                     | 18                      |
| FBgn0000055           | 679.23           | 60                 | 5                          | AIELNQNGAIWK            | 42d                     | 18                      |
| FBgn0000055           | 585.46           | 66                 | 4                          | IENPAAIAELK             | 42d                     | 18                      |
| FBgn0000055           | 745.03           | 63                 | 2                          | LDLGTLEAIQWTK           | 42d                     | 18                      |
| FBgn0000055           | 666.41           | 56                 | 2                          | LLAHPTQPSLACAENFVK      | 42d                     | 18                      |
| FBgn0000055           | 422.25           | 35                 | 2                          | NLVILDR                 | 42d                     | 18                      |
| FBgn0000055           | 997.1            | 95                 | 2                          | NLVILDRIENPAAIAELK      | 42d                     | 18                      |
| FBgn0000055           | 831.5            | 117                | 4                          | NVIFVAGLGGIGLDTSK       | 42d                     | 18                      |
| FBgn0000055           | 1229.33          | 127                | 11                         | TIAVNYTGLVNTTTAILDFWDK  | 42d                     | 18                      |
| FBgn0000055           | 1307             | 77                 | 5                          | TIAVNYTGLVNTTTAILDFWDKR | 42d                     | 18                      |

|             |         |     |   |                               |      |    |
|-------------|---------|-----|---|-------------------------------|------|----|
| FBgn0000055 | 411.02  | 35  | 1 | TIFAQLK                       | 42d  | 18 |
| FBgn0000055 | 1157.89 | 81  | 5 | TTLVHTFNSWLDVEPQVAEK          | 42d  | 18 |
| FBgn0000055 | 1039.97 | 108 | 6 | TVDVLINGAGILDDHQIER           | 42d  | 18 |
| FBgn0000055 | 1073.21 | 61  | 5 | VTVTFYPYDVTVPPIAETTK          | 42d  | 18 |
| FBgn0000055 | 679.93  | 84  | 8 | AIELNENGAIWK                  | 62d  | 18 |
| FBgn0000055 | 585.45  | 71  | 6 | IENPAAIAELK                   | 62d  | 18 |
| FBgn0000055 | 999.04  | 72  | 5 | LLAHPTQPSLACAENFVK            | 62d  | 18 |
| FBgn0000055 | 422.39  | 36  | 1 | NLVILDR                       | 62d  | 18 |
| FBgn0000055 | 831.56  | 79  | 3 | NVIFVAGLGGIGLDTSK             | 62d  | 18 |
| FBgn0000055 | 1228.92 | 87  | 3 | TIAVNYTGLVNTTTAILDFWDK        | 62d  | 18 |
| FBgn0000055 | 871.84  | 44  | 1 | TIAVNYTGLVNTTTAILDFWDKR       | 62d  | 18 |
| FBgn0000055 | 411.31  | 34  | 1 | TIFAQLK                       | 62d  | 18 |
| FBgn0000055 | 1157.99 | 94  | 6 | TTLVHTFNSWLDVEPQVAEK          | 62d  | 18 |
| FBgn0000055 | 1040.29 | 108 | 5 | TVDVLINGAGILDDHQIER           | 62d  | 18 |
| FBgn0000055 | 1072.84 | 55  | 3 | VTVTFYPYDVTVPPIAETTK          | 62d  | 18 |
| FBgn0000055 | 679.21  | 81  | 5 | AIELNQNGAIWK                  | 82d  | 18 |
| FBgn0000055 | 875.36  | 38  | 1 | EGGPGGIICNIGSVTGFN            | 82d  | 18 |
| FBgn0000055 | 585.54  | 74  | 4 | IENPAAIAELK                   | 82d  | 18 |
| FBgn0000055 | 998.91  | 70  | 4 | LLAHPTQPSLACAENFVK            | 82d  | 18 |
| FBgn0000055 | 831.44  | 72  | 3 | NVIFVAGLGGIGLDTSK             | 82d  | 18 |
| FBgn0000055 | 1229.34 | 60  | 3 | TIAVNYTGLVNTTTAILDFWDK        | 82d  | 18 |
| FBgn0000055 | 411.18  | 40  | 1 | TIFAQLK                       | 82d  | 18 |
| FBgn0000055 | 1158.31 | 67  | 1 | TTLVHTFNSWLDVEPQVAEK          | 82d  | 18 |
| FBgn0000055 | 1040.25 | 74  | 4 | TVDVLINGAGILDDHQIER           | 82d  | 18 |
| FBgn0000055 | 1072.98 | 59  | 3 | VTVTFYPYDVTVPPIAETTK          | 82d  | 18 |
| FBgn0000055 | 604.61  | 54  | 2 | AAVVNFTSSLAK                  | 102d | 18 |
| FBgn0000055 | 678.57  | 78  | 3 | AIELNQNGAIWK                  | 102d | 18 |
| FBgn0000055 | 875.24  | 47  | 1 | EGGPGGIICNIGSVTGFN            | 102d | 18 |
| FBgn0000055 | 1464.46 | 94  | 1 | GGPGGIICNIGSVTGFNAIYQVPVYSGTK | 102d | 18 |
| FBgn0000055 | 585.28  | 61  | 2 | IENPAAIAELK                   | 102d | 18 |
| FBgn0000055 | 875.07  | 60  | 1 | KGGPGGIICNIGSVTGFN            | 102d | 18 |
| FBgn0000055 | 745.1   | 75  | 1 | LDLGTLEAIQWTK                 | 102d | 18 |

|             |         |     |   |                               |      |    |
|-------------|---------|-----|---|-------------------------------|------|----|
| FBgn0000055 | 1159.82 | 66  | 1 | LKTVDVLINGAGILDDHQIER         | 102d | 18 |
| FBgn0000055 | 666.45  | 80  | 3 | LLAHPTQPSLACAENFVK            | 102d | 18 |
| FBgn0000055 | 831.42  | 62  | 1 | NVIFVAGLGGIGLDTSK             | 102d | 18 |
| FBgn0000055 | 1228.86 | 103 | 2 | TIAVNYTGLVNNTTTAILDFWDK       | 102d | 18 |
| FBgn0000055 | 1307.2  | 61  | 1 | TIAVNYTGLVNNTTTAILDFWDKR      | 102d | 18 |
| FBgn0000055 | 1158.18 | 91  | 3 | TTLVHTFNSWLDVEPQVAEK          | 102d | 18 |
| FBgn0000055 | 1040.14 | 94  | 3 | TVDVLINGAGILDDHQIER           | 102d | 18 |
| FBgn0000055 | 1073.22 | 60  | 3 | VTVTFYPYDVTVPIAETTK           | 102d | 18 |
| FBgn0000055 | 604.83  | 49  | 2 | AAVVNFTSSLAK                  | 112d | 18 |
| FBgn0000055 | 678.98  | 71  | 4 | AIELNQNGAIWK                  | 112d | 18 |
| FBgn0000055 | 1464.09 | 52  | 3 | GGPGGIICNIGSVTGFNAIQVPVYSGTK  | 112d | 18 |
| FBgn0000055 | 585.34  | 64  | 3 | IENPAAIAELK                   | 112d | 18 |
| FBgn0000055 | 874.57  | 63  | 2 | KGGPGGIICNIGSVTGFN            | 112d | 18 |
| FBgn0000055 | 999     | 77  | 2 | LLAHPTQPSLACAENFVK            | 112d | 18 |
| FBgn0000055 | 831.28  | 41  | 1 | NVIFVAGLGGIGLDTSK             | 112d | 18 |
| FBgn0000055 | 1228.36 | 115 | 3 | TIAVNYTGLVNNTTTAILDFWDK       | 112d | 18 |
| FBgn0000055 | 772.34  | 75  | 4 | TTLVHTFNSWLDVEPQVAEK          | 112d | 18 |
| FBgn0000055 | 1039.94 | 95  | 2 | TVDVLINGAGILDDHQIER           | 112d | 18 |
| FBgn0000055 | 1073.22 | 61  | 3 | VTVTFYPYDVTVPIAETTK           | 112d | 18 |
| FBgn0000055 | 603.94  | 46  | 3 | AAVVNFTSSLAK                  | 122d | 18 |
| FBgn0000055 | 679.27  | 78  | 6 | AIELNQNGAIWK                  | 122d | 18 |
| FBgn0000055 | 875.52  | 58  | 1 | EGGPGGIICNIGSVTGFN            | 122d | 18 |
| FBgn0000055 | 1464.22 | 48  | 1 | GGPGGIICNIGSVTGFNAIQVPVYSGTK  | 122d | 18 |
| FBgn0000055 | 585.44  | 70  | 5 | IENPAAIAELK                   | 122d | 18 |
| FBgn0000055 | 875.18  | 58  | 1 | KGGPGGIICNIGSVTGFN            | 122d | 18 |
| FBgn0000055 | 1528.27 | 78  | 1 | KGGPGGIICNIGSVTGFNAIQVPVYSGTK | 122d | 18 |
| FBgn0000055 | 744.69  | 62  | 1 | LDLGTLEAIQWTK                 | 122d | 18 |
| FBgn0000055 | 666.26  | 59  | 3 | LLAHPTQPSLACAENFVK            | 122d | 18 |
| FBgn0000055 | 831.16  | 38  | 1 | NVIFVAGLGGIGLDTSK             | 122d | 18 |
| FBgn0000055 | 1228.82 | 96  | 2 | TIAVNYTGLVNNTTTAILDFWDK       | 122d | 18 |
| FBgn0000055 | 1307.3  | 62  | 1 | TIAVNYTGLVNNTTTAILDFWDKR      | 122d | 18 |
| FBgn0000055 | 1158.2  | 92  | 4 | TTLVHTFNSWLDVEPQVAEK          | 122d | 18 |

|             |         |     |   |                              |      |    |
|-------------|---------|-----|---|------------------------------|------|----|
| FBgn0000055 | 1040.13 | 74  | 3 | TVDVLINGAGILDDHQIER          | 122d | 18 |
| FBgn0000055 | 1073.3  | 50  | 6 | VTVTFYPYDVTVPIAETTK          | 122d | 18 |
| FBgn0000055 | 604.96  | 43  | 2 | AAVVNFTSSLAK                 | 132d | 18 |
| FBgn0000055 | 679.78  | 55  | 2 | AIELNENGAIWK                 | 132d | 18 |
| FBgn0000055 | 679.39  | 60  | 2 | AIELNQNGAIWK                 | 132d | 18 |
| FBgn0000055 | 1464.22 | 66  | 1 | GGPGGIICNIGSVTGFNAIQVPVYSGTK | 132d | 18 |
| FBgn0000055 | 585.41  | 68  | 4 | IENPAAIAELK                  | 132d | 18 |
| FBgn0000055 | 999.25  | 64  | 3 | LLAHPTQPSLACAENFVK           | 132d | 18 |
| FBgn0000055 | 831.61  | 49  | 1 | NVIFVAGLGGIGLDTSK            | 132d | 18 |
| FBgn0000055 | 1229.17 | 60  | 1 | TIAVNYTGLVNNTTTAILDFWDK      | 132d | 18 |
| FBgn0000055 | 772.25  | 92  | 3 | TTLVHTFNSWLDVEPQVAEK         | 132d | 18 |
| FBgn0000055 | 1040.24 | 90  | 2 | TVDVLINGAGILDDHQIER          | 132d | 18 |
| FBgn0000055 | 605.02  | 48  | 3 | AAVVNFTSSLAK                 | 142d | 18 |
| FBgn0000055 | 679.09  | 85  | 6 | AIELNQNGAIWK                 | 142d | 18 |
| FBgn0000055 | 1464.39 | 39  | 1 | GGPGGIICNIGSVTGFNAIQVPVYSGTK | 142d | 18 |
| FBgn0000055 | 585.51  | 68  | 4 | IENPAAIAELK                  | 142d | 18 |
| FBgn0000055 | 875.05  | 65  | 1 | KGGPGGIICNIGSVTGFN           | 142d | 18 |
| FBgn0000055 | 745     | 56  | 2 | LDLGTLEAIQWTK                | 142d | 18 |
| FBgn0000055 | 665.74  | 59  | 3 | LLAHPTQPSLACAENFVK           | 142d | 18 |
| FBgn0000055 | 831.15  | 41  | 1 | NVIFVAGLGGIGLDTSK            | 142d | 18 |
| FBgn0000055 | 1229.34 | 96  | 2 | TIAVNYTGLVNNTTTAILDFWDK      | 142d | 18 |
| FBgn0000055 | 1307.36 | 77  | 1 | TIAVNYTGLVNNTTTAILDFWDKR     | 142d | 18 |
| FBgn0000055 | 771.6   | 71  | 2 | TTLVHTFNSWLDVEPQVAEK         | 142d | 18 |
| FBgn0000055 | 1040.28 | 86  | 3 | TVDVLINGAGILDDHQIER          | 142d | 18 |
| FBgn0000055 | 1073.1  | 50  | 3 | VTVTFYPYDVTVPIAETTK          | 142d | 18 |
| FBgn0000055 | 604.84  | 61  | 3 | AAVVNFTSSLAK                 | 2d   | 28 |
| FBgn0000055 | 679.59  | 85  | 5 | AIELNQNGAIWK                 | 2d   | 28 |
| FBgn0000055 | 585.17  | 72  | 6 | IENPAAIAELK                  | 2d   | 28 |
| FBgn0000055 | 744.77  | 68  | 3 | LDLGTLEAIQWTK                | 2d   | 28 |
| FBgn0000055 | 998.86  | 63  | 6 | LLAHPTQPSLACAENFVK           | 2d   | 28 |
| FBgn0000055 | 831.62  | 41  | 2 | NVIFVAGLGGIGLDTSK            | 2d   | 28 |
| FBgn0000055 | 1229.26 | 111 | 4 | TIAVNYTGLVNNTTTAILDFWDK      | 2d   | 28 |

|             |         |     |   |                              |     |    |
|-------------|---------|-----|---|------------------------------|-----|----|
| FBgn0000055 | 1307.3  | 61  | 1 | TIAVNYTGLVNTTTAILDFWDKR      | 2d  | 28 |
| FBgn0000055 | 1158.02 | 77  | 4 | TTLVHTFNSWLDVEPQVAEK         | 2d  | 28 |
| FBgn0000055 | 1039.97 | 95  | 5 | TVDVLINGAGILDDHQIER          | 2d  | 28 |
| FBgn0000055 | 604.95  | 56  | 6 | AAVVNFTSSLAK                 | 12d | 28 |
| FBgn0000055 | 679.43  | 72  | 6 | AIELNQNGAIWK                 | 12d | 28 |
| FBgn0000055 | 585.13  | 76  | 6 | IENPAAIAELK                  | 12d | 28 |
| FBgn0000055 | 744.96  | 62  | 2 | LDLGTLEAIQWTK                | 12d | 28 |
| FBgn0000055 | 665.66  | 67  | 3 | LLAHPTQPSLACAENFVK           | 12d | 28 |
| FBgn0000055 | 831.68  | 86  | 3 | NVIFVAGLGGIGLDTSK            | 12d | 28 |
| FBgn0000055 | 1228.99 | 128 | 4 | TIAVNYTGLVNTTTAILDFWDK       | 12d | 28 |
| FBgn0000055 | 1307.41 | 77  | 4 | TIAVNYTGLVNTTTAILDFWDKR      | 12d | 28 |
| FBgn0000055 | 411.32  | 39  | 2 | TIFAQLK                      | 12d | 28 |
| FBgn0000055 | 1157.94 | 92  | 6 | TTLVHTFNSWLDVEPQVAEK         | 12d | 28 |
| FBgn0000055 | 1040.18 | 96  | 5 | TVDVLINGAGILDDHQIER          | 12d | 28 |
| FBgn0000055 | 1073.28 | 61  | 3 | VTVTFYPYDVTVPIAETTK          | 12d | 28 |
| FBgn0000055 | 604.73  | 54  | 2 | AAVVNFTSSLAK                 | 22d | 28 |
| FBgn0000055 | 679.3   | 72  | 3 | AIELNQNGAIWK                 | 22d | 28 |
| FBgn0000055 | 585.01  | 60  | 4 | IENPAAIAELK                  | 22d | 28 |
| FBgn0000055 | 1019.29 | 44  | 1 | KGPGGIICNIGSVTFNIAIQVPVYSGTK | 22d | 28 |
| FBgn0000055 | 666.17  | 58  | 2 | LLAHPTQPSLACAENFVK           | 22d | 28 |
| FBgn0000055 | 422.04  | 34  | 1 | NLVILDR                      | 22d | 28 |
| FBgn0000055 | 1158.02 | 74  | 1 | TTLVHTFNSWLDVEPQVAEK         | 22d | 28 |
| FBgn0000055 | 693.82  | 101 | 6 | TVDVLINGAGILDDHQIER          | 22d | 28 |
| FBgn0000055 | 1072.88 | 65  | 2 | VTVTFYPYDVTVPIAETTK          | 22d | 28 |
| FBgn0000055 | 604.85  | 47  | 3 | AAVVNFTSSLAK                 | 32d | 28 |
| FBgn0000055 | 679.64  | 60  | 4 | AIELNENGAIWK                 | 32d | 28 |
| FBgn0000055 | 679.49  | 73  | 3 | AIELNQNGAIWK                 | 32d | 28 |
| FBgn0000055 | 585.49  | 64  | 5 | IENPAAIAELK                  | 32d | 28 |
| FBgn0000055 | 998.99  | 63  | 3 | LLAHPTQPSLACAENFVK           | 32d | 28 |
| FBgn0000055 | 831.58  | 74  | 3 | NVIFVAGLGGIGLDTSK            | 32d | 28 |
| FBgn0000055 | 1229.01 | 97  | 3 | TIAVNYTGLVNTTTAILDFWDK       | 32d | 28 |
| FBgn0000055 | 411.19  | 36  | 1 | TIFAKLK                      | 32d | 28 |

|             |         |     |   |                               |     |    |
|-------------|---------|-----|---|-------------------------------|-----|----|
| FBgn0000055 | 411.19  | 36  | 1 | TIFAQLK                       | 32d | 28 |
| FBgn0000055 | 772.47  | 77  | 7 | TTLVHTFNSWLDVEPQVAEK          | 32d | 28 |
| FBgn0000055 | 1039.98 | 81  | 5 | TVDVLINGAGILDDHQIER           | 32d | 28 |
| FBgn0000055 | 1072.94 | 39  | 1 | VTVTFYPYDVTVPPIAETTK          | 32d | 28 |
| FBgn0000055 | 604.91  | 53  | 2 | AAVVNFTSSLAK                  | 36d | 28 |
| FBgn0000055 | 679.88  | 78  | 5 | AIELNENGAIWK                  | 36d | 28 |
| FBgn0000055 | 679.21  | 72  | 2 | AIELNQNGAIWK                  | 36d | 28 |
| FBgn0000055 | 585.46  | 66  | 6 | IENPAAIAELK                   | 36d | 28 |
| FBgn0000055 | 875.07  | 39  | 1 | KGGPGGIICNIGSVTGFN            | 36d | 28 |
| FBgn0000055 | 998.89  | 77  | 3 | LLAHPTQPSLACAENFVK            | 36d | 28 |
| FBgn0000055 | 831.67  | 87  | 3 | NVIFVAGLGGIGLDTSK             | 36d | 28 |
| FBgn0000055 | 1229.19 | 37  | 1 | TIAVNYTGLVNNTTTAILDFWDK       | 36d | 28 |
| FBgn0000055 | 877.85  | 76  | 1 | TIAVNYTGLVNNTTAIMDFWDKR       | 36d | 28 |
| FBgn0000055 | 1158.02 | 86  | 6 | TTLVHTFNSWLDVEPQVAEK          | 36d | 28 |
| FBgn0000055 | 1040.13 | 107 | 6 | TVDVLINGAGILDDHQIER           | 36d | 28 |
| FBgn0000055 | 1073.03 | 46  | 5 | VTVTFYPYDVTVPPIAETTK          | 36d | 28 |
| FBgn0000055 | 604.82  | 60  | 3 | AAVVNFTSSLAK                  | 42d | 28 |
| FBgn0000055 | 679.39  | 77  | 6 | AIELNQNGAIWK                  | 42d | 28 |
| FBgn0000055 | 585.12  | 75  | 5 | IENPAAIAELK                   | 42d | 28 |
| FBgn0000055 | 744.9   | 56  | 1 | LDLGTLEAIQWTK                 | 42d | 28 |
| FBgn0000055 | 999.06  | 58  | 2 | LLAHPTQPSLACAENFVK            | 42d | 28 |
| FBgn0000055 | 422.02  | 36  | 1 | NLVILDR                       | 42d | 28 |
| FBgn0000055 | 831.68  | 95  | 3 | NVIFVAGLGGIGLDTSK             | 42d | 28 |
| FBgn0000055 | 1228.99 | 110 | 5 | TIAVNYTGLVNNTTTAILDFWDK       | 42d | 28 |
| FBgn0000055 | 1307.07 | 92  | 3 | TIAVNYTGLVNNTTTAILDFWDKR      | 42d | 28 |
| FBgn0000055 | 1158.01 | 89  | 6 | TTLVHTFNSWLDVEPQVAEK          | 42d | 28 |
| FBgn0000055 | 1040.02 | 89  | 6 | TVDVLINGAGILDDHQIER           | 42d | 28 |
| FBgn0000055 | 1073.18 | 43  | 4 | VTVTFYPYDVTVPPIAETTK          | 42d | 28 |
| FBgn0000055 | 605.03  | 48  | 3 | AAVVNFTSSLAK                  | 46d | 28 |
| FBgn0000055 | 679.62  | 66  | 4 | AIELNENGAIWK                  | 46d | 28 |
| FBgn0000055 | 679.26  | 84  | 4 | AIELNQNGAIWK                  | 46d | 28 |
| FBgn0000055 | 1464.11 | 57  | 1 | GGPGGIICNIGSVTGFNAIYQVPVYSGTK | 46d | 28 |

|             |         |     |   |                         |     |    |
|-------------|---------|-----|---|-------------------------|-----|----|
| FBgn0000055 | 585.44  | 64  | 6 | IENPAAIAELK             | 46d | 28 |
| FBgn0000055 | 875.16  | 40  | 2 | KGGPGGIICNIGSVTGFN      | 46d | 28 |
| FBgn0000055 | 745     | 69  | 1 | LDLGTLEAIQWTK           | 46d | 28 |
| FBgn0000055 | 999.03  | 64  | 2 | LLAHPTQPSLACAENFVK      | 46d | 28 |
| FBgn0000055 | 422.15  | 39  | 3 | NLVILDR                 | 46d | 28 |
| FBgn0000055 | 831.56  | 94  | 3 | NVIFVAGLGGIGLDTSK       | 46d | 28 |
| FBgn0000055 | 1228.86 | 98  | 3 | TIAVNYTGLVNTTTAILDFWDK  | 46d | 28 |
| FBgn0000055 | 1158.27 | 98  | 6 | TTLVHTFNSWLDVEPQVAEK    | 46d | 28 |
| FBgn0000055 | 1040.05 | 97  | 6 | TVDVLINGAGILDDHQIER     | 46d | 28 |
| FBgn0000055 | 1073.29 | 55  | 2 | VTVTFYPYDVTVPPIAETTK    | 46d | 28 |
| FBgn0000055 | 604.72  | 60  | 5 | AAVVNFTSSLAK            | 50d | 28 |
| FBgn0000055 | 679.89  | 78  | 3 | AIELNENGAIWK            | 50d | 28 |
| FBgn0000055 | 679.5   | 72  | 2 | AIELNQNGAIWK            | 50d | 28 |
| FBgn0000055 | 585.35  | 68  | 6 | IENPAAIAELK             | 50d | 28 |
| FBgn0000055 | 998.97  | 64  | 3 | LLAHPTQPSLACAENFVK      | 50d | 28 |
| FBgn0000055 | 831.51  | 103 | 3 | NVIFVAGLGGIGLDTSK       | 50d | 28 |
| FBgn0000055 | 1229.32 | 110 | 5 | TIAVNYTGLVNTTTAILDFWDK  | 50d | 28 |
| FBgn0000055 | 871.72  | 66  | 2 | TIAVNYTGLVNTTTAILDFWDKR | 50d | 28 |
| FBgn0000055 | 1158    | 91  | 3 | TTLVHTFNSWLDVEPQVAEK    | 50d | 28 |
| FBgn0000055 | 1040.15 | 91  | 3 | TVDVLINGAGILDDHQIER     | 50d | 28 |
| FBgn0000055 | 1073.18 | 50  | 3 | VTVTFYPYDVTVPPIAETTK    | 50d | 28 |
| FBgn0000055 | 604.98  | 46  | 3 | AAVVNFTSSLAK            | 52d | 28 |
| FBgn0000055 | 679.77  | 73  | 5 | AIELNENGAIWK            | 52d | 28 |
| FBgn0000055 | 679.53  | 73  | 2 | AIELNQNGAIWK            | 52d | 28 |
| FBgn0000055 | 875.56  | 44  | 1 | EGGPGGIICNIGSVTGFN      | 52d | 28 |
| FBgn0000055 | 585.26  | 66  | 5 | IENPAAIAELK             | 52d | 28 |
| FBgn0000055 | 998.87  | 72  | 3 | LLAHPTQPSLACAENFVK      | 52d | 28 |
| FBgn0000055 | 685.44  | 44  | 1 | LLEHPTQPSLACAQNFVK      | 52d | 28 |
| FBgn0000055 | 454.43  | 34  | 1 | LLTTIFAK                | 52d | 28 |
| FBgn0000055 | 422.14  | 35  | 1 | NLVILDR                 | 52d | 28 |
| FBgn0000055 | 831.44  | 99  | 3 | NVIFVAGLGGIGLDTSK       | 52d | 28 |
| FBgn0000055 | 1158.32 | 82  | 3 | TTLVHTFNSWLDVEPQVAEK    | 52d | 28 |

|             |         |    |   |                         |     |    |
|-------------|---------|----|---|-------------------------|-----|----|
| FBgn0000055 | 1040.18 | 94 | 3 | TVDVLINGAGILDDHQIER     | 52d | 28 |
| FBgn0000055 | 605.06  | 51 | 3 | AAVVNFTSSLAK            | 56d | 28 |
| FBgn0000055 | 679.74  | 58 | 3 | AIELNENGAIWK            | 56d | 28 |
| FBgn0000055 | 679.27  | 65 | 3 | AIELNQNGAIWK            | 56d | 28 |
| FBgn0000055 | 585.34  | 69 | 4 | IENPAAIAELK             | 56d | 28 |
| FBgn0000055 | 874.91  | 56 | 2 | KGGPGGHCNIGSVTGFN       | 56d | 28 |
| FBgn0000055 | 744.91  | 74 | 2 | LDLGTLEAIQWTK           | 56d | 28 |
| FBgn0000055 | 999.2   | 66 | 3 | LLAHPTQPSLACAENFVK      | 56d | 28 |
| FBgn0000055 | 830.98  | 78 | 4 | NVIFVAGLGGIGLDTSK       | 56d | 28 |
| FBgn0000055 | 1158.16 | 65 | 1 | TTLVHTFNWSWLDVEPQVAEK   | 56d | 28 |
| FBgn0000055 | 1040.14 | 97 | 3 | TVDVLINGAGILDDHQIER     | 56d | 28 |
| FBgn0000055 | 1073.28 | 58 | 3 | VTVTFYPYDVTVPAAETTK     | 56d | 28 |
| FBgn0000064 | 639.19  | 52 | 3 | ADDGTPFAEILK            | 2d  | 18 |
| FBgn0000064 | 674.13  | 64 | 2 | GILAADESGPTMGK          | 2d  | 18 |
| FBgn0000064 | 1195.47 | 94 | 5 | GVVPLFGSEDEVTTQGLDDLAAR | 2d  | 18 |
| FBgn0000064 | 1065.08 | 56 | 3 | IVPIVEPEVLDPGDHDLDR     | 2d  | 18 |
| FBgn0000064 | 878.06  | 94 | 2 | KNTPEEIALATVQALR        | 2d  | 18 |
| FBgn0000064 | 752.46  | 90 | 3 | LQDIGVENTEDNR           | 2d  | 18 |
| FBgn0000064 | 554.05  | 42 | 1 | LQDIGVENTEDNRR          | 2d  | 18 |
| FBgn0000064 | 813.96  | 39 | 1 | NTPEEIALATVQALR         | 2d  | 18 |
| FBgn0000064 | 945.98  | 84 | 3 | NTPSYQSILENANVLAR       | 2d  | 18 |
| FBgn0000064 | 597.96  | 57 | 3 | VTETVLAAYK              | 2d  | 18 |
| FBgn0000064 | 950.4   | 81 | 1 | YVAGSAGAGSGSLFVANHAY    | 2d  | 18 |
| FBgn0000064 | 639.22  | 81 | 3 | ADDGTPFAEILK            | 22d | 18 |
| FBgn0000064 | 650.81  | 66 | 5 | ENIAAGQNELLK            | 22d | 18 |
| FBgn0000064 | 674.36  | 66 | 3 | GILAADESGPTMGK          | 22d | 18 |
| FBgn0000064 | 1195.59 | 77 | 3 | GVVPLFGSEDEVTTQGLDDLAAR | 22d | 18 |
| FBgn0000064 | 1064.71 | 65 | 3 | IVPIVEPEVLDPGDHDLDR     | 22d | 18 |
| FBgn0000064 | 813.75  | 72 | 1 | NTPEEIALATVQALR         | 22d | 18 |
| FBgn0000064 | 639.22  | 56 | 2 | ADDGTPFAEILK            | 42d | 18 |
| FBgn0000064 | 357.91  | 39 | 1 | GILGIK                  | 42d | 18 |
| FBgn0000064 | 674.23  | 60 | 2 | GILAADESGPTMGK          | 42d | 18 |



|             |         |     |   |                         |     |    |
|-------------|---------|-----|---|-------------------------|-----|----|
| FBgn0000064 | 1195.65 | 77  | 4 | GVVPLFGSEDEVTTQGLDDLAAR | 42d | 18 |
| FBgn0000064 | 1065.25 | 65  | 3 | IVPIVEPEVLPDGDHDLDR     | 42d | 18 |
| FBgn0000064 | 585.54  | 102 | 3 | KNTPEEIALATVQALR        | 42d | 18 |
| FBgn0000064 | 692.83  | 67  | 4 | LAENISGVILFHETLYQK      | 42d | 18 |
| FBgn0000064 | 814.16  | 64  | 3 | NTPEEIALATVQALR         | 42d | 18 |
| FBgn0000064 | 946.18  | 79  | 3 | NTPSYQSILENANVLAR       | 42d | 18 |
| FBgn0000064 | 525.38  | 42  | 2 | QLLFSTDPK               | 42d | 18 |
| FBgn0000064 | 597.95  | 76  | 1 | VTETVLAAVYK             | 42d | 18 |
| FBgn0000064 | 950.34  | 115 | 1 | YVAGSAGAGSGSLFVANHAY    | 42d | 18 |
| FBgn0000064 | 639.1   | 74  | 2 | ADDGTPFAEILK            | 62d | 18 |
| FBgn0000064 | 429.68  | 50  | 3 | ALQASVLR                | 62d | 18 |
| FBgn0000064 | 651.04  | 57  | 3 | ENIAAGQNELLK            | 62d | 18 |
| FBgn0000064 | 674.39  | 52  | 1 | GILAADESGPTMGK          | 62d | 18 |
| FBgn0000064 | 1195.59 | 105 | 6 | GVVPLFGSEDEVTTQGLDDLAAR | 62d | 18 |
| FBgn0000064 | 1065.14 | 69  | 2 | IVPIVEPEVLPDGDHDLDR     | 62d | 18 |
| FBgn0000064 | 877.91  | 82  | 3 | KNTPEEIALATVQALR        | 62d | 18 |
| FBgn0000064 | 752.2   | 70  | 1 | LQDIGVENTEDNR           | 62d | 18 |
| FBgn0000064 | 543     | 43  | 2 | NTPEEIALATVQALR         | 62d | 18 |
| FBgn0000064 | 945.96  | 79  | 4 | NTPSYQSILENANVLAR       | 62d | 18 |
| FBgn0000064 | 525.32  | 36  | 2 | QLLFSTDPK               | 62d | 18 |
| FBgn0000064 | 557.28  | 52  | 2 | YASICQSQR               | 62d | 18 |
| FBgn0000064 | 639.54  | 48  | 1 | ADDGTPFAEILK            | 82d | 18 |
| FBgn0000064 | 651.09  | 46  | 1 | ENIAAGQNELLK            | 82d | 18 |
| FBgn0000064 | 674.31  | 57  | 1 | GILAADESGPTMGK          | 82d | 18 |
| FBgn0000064 | 1195.81 | 73  | 2 | GVVPLFGSEDEVTTQGLDDLAAR | 82d | 18 |
| FBgn0000064 | 1065.09 | 72  | 3 | IVPIVEPEVLPDGDHDLDR     | 82d | 18 |
| FBgn0000064 | 877.38  | 81  | 2 | KNTPEEIALATVQALR        | 82d | 18 |
| FBgn0000064 | 752.52  | 76  | 2 | LQDIGVENTEDNR           | 82d | 18 |
| FBgn0000064 | 554.04  | 46  | 1 | LQDIGVENTEDNRR          | 82d | 18 |
| FBgn0000064 | 946.01  | 52  | 1 | NTPSYQSILENANVLAR       | 82d | 18 |
| FBgn0000064 | 597.97  | 67  | 1 | VTETVLAAVYK             | 82d | 18 |
| FBgn0000064 | 950.49  | 35  | 1 | YVAGSAGAGSGSLFVANHAY    | 82d | 18 |

|             |         |     |   |                         |      |    |
|-------------|---------|-----|---|-------------------------|------|----|
| FBgn0000064 | 638.95  | 55  | 3 | ADDGTPFAEILK            | 102d | 18 |
| FBgn0000064 | 1195.81 | 77  | 2 | GVVPLFGSEDEVTTQGLDDLAAR | 102d | 18 |
| FBgn0000064 | 1064.81 | 69  | 6 | IVPIVEPEVLPDGDHDLDR     | 102d | 18 |
| FBgn0000064 | 877.68  | 78  | 3 | KNTPEEIALATVQALR        | 102d | 18 |
| FBgn0000064 | 752.17  | 77  | 3 | LQDIGVENTEDNR           | 102d | 18 |
| FBgn0000064 | 554     | 35  | 2 | LQDIGVENTEDNRR          | 102d | 18 |
| FBgn0000064 | 945.72  | 87  | 4 | NTPSYQSILENANVLAR       | 102d | 18 |
| FBgn0000064 | 597.92  | 83  | 1 | VTETVLAAYK              | 102d | 18 |
| FBgn0000064 | 639.35  | 81  | 2 | ADDGTPFAEILK            | 112d | 18 |
| FBgn0000064 | 1195.5  | 87  | 4 | GVVPLFGSEDEVTTQGLDDLAAR | 112d | 18 |
| FBgn0000064 | 1064.69 | 61  | 5 | IVPIVEPEVLPDGDHDLDR     | 112d | 18 |
| FBgn0000064 | 877.76  | 65  | 3 | KNTPEEIALATVQALR        | 112d | 18 |
| FBgn0000064 | 542.95  | 54  | 2 | NTPEEIALATVQALR         | 112d | 18 |
| FBgn0000064 | 945.9   | 45  | 1 | NTPSYQSILENANVLAR       | 112d | 18 |
| FBgn0000064 | 950.67  | 105 | 2 | YVAGSAGAGSGSLFVANHAY    | 112d | 18 |
| FBgn0000064 | 639.5   | 68  | 3 | ADDGTPFAEILK            | 122d | 18 |
| FBgn0000064 | 1195.52 | 71  | 4 | GVVPLFGSEDEVTTQGLDDLAAR | 122d | 18 |
| FBgn0000064 | 1065.26 | 63  | 2 | IVPIVEPEVLPDGDHDLDR     | 122d | 18 |
| FBgn0000064 | 752.46  | 61  | 2 | LQDIGVENTEDNR           | 122d | 18 |
| FBgn0000064 | 945.51  | 85  | 3 | NTPSYQSILENANVLAR       | 122d | 18 |
| FBgn0000064 | 597.87  | 59  | 1 | VTETVLAAYK              | 122d | 18 |
| FBgn0000064 | 950.28  | 98  | 1 | YVAGSAGAGSGSLFVANHAY    | 122d | 18 |
| FBgn0000064 | 639.57  | 48  | 2 | ADDGTPFAEILK            | 132d | 18 |
| FBgn0000064 | 703.08  | 34  | 1 | ADDGTPFAEILKK           | 132d | 18 |
| FBgn0000064 | 651.08  | 52  | 1 | ENIAAGQNELLK            | 132d | 18 |
| FBgn0000064 | 674.03  | 59  | 1 | GILAADESGPTMGK          | 132d | 18 |
| FBgn0000064 | 1195.84 | 84  | 1 | GVVPLFGSEDEVTTQGLDDLAAR | 132d | 18 |
| FBgn0000064 | 1065.13 | 65  | 4 | IVPIVEPEVLPDGDHDLDR     | 132d | 18 |
| FBgn0000064 | 585.81  | 53  | 2 | KNTPEEIALATVQALR        | 132d | 18 |
| FBgn0000064 | 542.97  | 51  | 1 | NTPEEIALATVQALR         | 132d | 18 |
| FBgn0000064 | 945.82  | 60  | 1 | NTPSYQSILENANVLAR       | 132d | 18 |
| FBgn0000064 | 525.35  | 45  | 3 | QLLFSTDPK               | 132d | 18 |

|             |         |     |   |                         |      |    |
|-------------|---------|-----|---|-------------------------|------|----|
| FBgn0000064 | 598.05  | 72  | 1 | VTETVLAAVYK             | 132d | 18 |
| FBgn0000064 | 639.04  | 66  | 2 | ADDGTPFAEILK            | 142d | 18 |
| FBgn0000064 | 674.4   | 64  | 1 | GILAADESGPTMGK          | 142d | 18 |
| FBgn0000064 | 1195.44 | 90  | 3 | GVVPLFGSEDEVTTQGLDDLAAR | 142d | 18 |
| FBgn0000064 | 1065.24 | 68  | 3 | IVPIVEPEVLPDGDHDLDR     | 142d | 18 |
| FBgn0000064 | 876.9   | 54  | 3 | KNTPEEIALATVQALR        | 142d | 18 |
| FBgn0000064 | 752.23  | 64  | 1 | LQDIGVENTEDNR           | 142d | 18 |
| FBgn0000064 | 830.56  | 34  | 1 | LQDIGVENTEDNRR          | 142d | 18 |
| FBgn0000064 | 542.6   | 39  | 1 | NTPEEIALATVQALR         | 142d | 18 |
| FBgn0000064 | 945.85  | 81  | 3 | NTPSYQSILENANVLAR       | 142d | 18 |
| FBgn0000064 | 639.43  | 58  | 1 | ADDGTPFAEILK            | 2d   | 28 |
| FBgn0000064 | 429.72  | 44  | 1 | ALQASVLR                | 2d   | 28 |
| FBgn0000064 | 651.08  | 72  | 5 | ENIAAGQNELLK            | 2d   | 28 |
| FBgn0000064 | 674.28  | 78  | 3 | GILAADESGPTMGK          | 2d   | 28 |
| FBgn0000064 | 1195.38 | 94  | 5 | GVVPLFGSEDEVTTQGLDDLAAR | 2d   | 28 |
| FBgn0000064 | 1064.88 | 71  | 3 | IVPIVEPEVLPDGDHDLDR     | 2d   | 28 |
| FBgn0000064 | 876.98  | 72  | 3 | KNTPEEIALATVQALR        | 2d   | 28 |
| FBgn0000064 | 752.49  | 77  | 9 | LQDIGVENTEDNR           | 2d   | 28 |
| FBgn0000064 | 814.03  | 70  | 3 | NTPEEIALATVQALR         | 2d   | 28 |
| FBgn0000064 | 945.63  | 79  | 4 | NTPSYQSILENANVLAR       | 2d   | 28 |
| FBgn0000064 | 525.12  | 50  | 2 | QLLFSTDPK               | 2d   | 28 |
| FBgn0000064 | 597.81  | 68  | 3 | VTETVLAAVYK             | 2d   | 28 |
| FBgn0000064 | 950.49  | 107 | 2 | YVAGSAGAGSGSLFVANHAY    | 2d   | 28 |
| FBgn0000064 | 639.06  | 75  | 2 | ADDGTPFAEILK            | 12d  | 28 |
| FBgn0000064 | 703.32  | 40  | 2 | ADDGTPFAEILKK           | 12d  | 28 |
| FBgn0000064 | 650.94  | 63  | 5 | ENIAAGQNELLK            | 12d  | 28 |
| FBgn0000064 | 728.71  | 78  | 2 | ENIAAGQNELLKR           | 12d  | 28 |
| FBgn0000064 | 674.13  | 78  | 2 | GILAADESGPTMGK          | 12d  | 28 |
| FBgn0000064 | 1195.39 | 89  | 5 | GVVPLFGSEDEVTTQGLDDLAAR | 12d  | 28 |
| FBgn0000064 | 1065.01 | 80  | 3 | IVPIVEPEVLPDGDHDLDR     | 12d  | 28 |
| FBgn0000064 | 878.05  | 103 | 3 | KNTPEEIALATVQALR        | 12d  | 28 |
| FBgn0000064 | 752.3   | 96  | 2 | LQDIGVENTEDNR           | 12d  | 28 |

|             |         |     |   |                         |     |    |
|-------------|---------|-----|---|-------------------------|-----|----|
| FBgn0000064 | 542.83  | 42  | 1 | NTPEEIALATVQALR         | 12d | 28 |
| FBgn0000064 | 946.04  | 90  | 3 | NTPSYQSILENANVLAR       | 12d | 28 |
| FBgn0000064 | 597.72  | 80  | 3 | VTETVLAAYK              | 12d | 28 |
| FBgn0000064 | 950.46  | 111 | 3 | YVAGSAGAGSGSLFVANHAY    | 12d | 28 |
| FBgn0000064 | 638.89  | 60  | 3 | ADDGTPFAEILK            | 22d | 28 |
| FBgn0000064 | 650.7   | 56  | 2 | ENIAAGQNELLK            | 22d | 28 |
| FBgn0000064 | 1195.78 | 89  | 3 | GVVPLFGSEDEVTTQGLDDLAAR | 22d | 28 |
| FBgn0000064 | 1065.15 | 65  | 3 | IVPIVEPEVLPDGDHDLDR     | 22d | 28 |
| FBgn0000064 | 878.21  | 62  | 1 | KNTPEEIALATVQALR        | 22d | 28 |
| FBgn0000064 | 945.75  | 79  | 2 | NTPSYQSILENANVLAR       | 22d | 28 |
| FBgn0000064 | 639.33  | 74  | 2 | ADDGTPFAEILK            | 32d | 28 |
| FBgn0000064 | 429.56  | 48  | 1 | ALQASVLR                | 32d | 28 |
| FBgn0000064 | 650.96  | 63  | 5 | ENIAAGQNELLK            | 32d | 28 |
| FBgn0000064 | 674.57  | 70  | 3 | GILAADESGPTMGK          | 32d | 28 |
| FBgn0000064 | 1195.63 | 71  | 3 | GVVPLFGSEDEVTTQGLDDLAAR | 32d | 28 |
| FBgn0000064 | 1065.08 | 70  | 3 | IVPIVEPEVLPDGDHDLDR     | 32d | 28 |
| FBgn0000064 | 714.88  | 45  | 2 | KENIAAGQNELLK           | 32d | 28 |
| FBgn0000064 | 877.91  | 74  | 3 | KNTPEEIALATVQALR        | 32d | 28 |
| FBgn0000064 | 1038.74 | 52  | 2 | LAENISGVILFHETLYQK      | 32d | 28 |
| FBgn0000064 | 752.17  | 77  | 2 | LQDIGVENTEDNR           | 32d | 28 |
| FBgn0000064 | 543.07  | 43  | 3 | NTPEEIALATVQALR         | 32d | 28 |
| FBgn0000064 | 946.21  | 62  | 4 | NTPSYQSILENANVLAR       | 32d | 28 |
| FBgn0000064 | 597.76  | 75  | 3 | VTETVLAAYK              | 32d | 28 |
| FBgn0000064 | 639.44  | 68  | 3 | ADDGTPFAEILK            | 36d | 28 |
| FBgn0000064 | 650.65  | 65  | 5 | ENIAAGQNELLK            | 36d | 28 |
| FBgn0000064 | 674.46  | 59  | 3 | GILAADESGPTMGK          | 36d | 28 |
| FBgn0000064 | 1195.56 | 95  | 4 | GVVPLFGSEDEVTTQGLDDLAAR | 36d | 28 |
| FBgn0000064 | 1064.94 | 85  | 3 | IVPIVEPEVLPDGDHDLDR     | 36d | 28 |
| FBgn0000064 | 877.97  | 87  | 2 | KNTPEEIALATVQALR        | 36d | 28 |
| FBgn0000064 | 752.48  | 65  | 1 | LQDIGVENTEDNR           | 36d | 28 |
| FBgn0000064 | 542.81  | 60  | 2 | NTPEEIALATVQALR         | 36d | 28 |
| FBgn0000064 | 946.14  | 63  | 3 | NTPSYQSILENANVLAR       | 36d | 28 |

|             |         |     |   |                         |     |    |
|-------------|---------|-----|---|-------------------------|-----|----|
| FBgn0000064 | 525.17  | 39  | 1 | QLLFSTDPK               | 36d | 28 |
| FBgn0000064 | 950.44  | 144 | 2 | YVAGSAGAGSGSLFVANHAY    | 36d | 28 |
| FBgn0000064 | 638.97  | 49  | 1 | ADDGTPFAEILK            | 42d | 28 |
| FBgn0000064 | 429.43  | 51  | 3 | ALQASVLR                | 42d | 28 |
| FBgn0000064 | 650.69  | 69  | 6 | ENIAAGQNELLK            | 42d | 28 |
| FBgn0000064 | 674.57  | 78  | 1 | GILAADESGPTMGK          | 42d | 28 |
| FBgn0000064 | 1195.52 | 82  | 3 | GVVPLFGSEDEVTTQGLDDLAAR | 42d | 28 |
| FBgn0000064 | 1065.08 | 77  | 3 | IVPIVEPEVLPDGDHDLDR     | 42d | 28 |
| FBgn0000064 | 752.53  | 74  | 3 | LQDIGVENTEDNR           | 42d | 28 |
| FBgn0000064 | 543.05  | 40  | 3 | NTPEEIALATVQALR         | 42d | 28 |
| FBgn0000064 | 946.18  | 89  | 6 | NTPSYQSILENANVLAR       | 42d | 28 |
| FBgn0000064 | 525.27  | 49  | 3 | QLLFSTDPK               | 42d | 28 |
| FBgn0000064 | 597.9   | 78  | 3 | VTETVLAAVYK             | 42d | 28 |
| FBgn0000064 | 950.39  | 89  | 2 | YVAGSAGAGSGSLFVANHAY    | 42d | 28 |
| FBgn0000064 | 639.35  | 65  | 2 | ADDGTPFAEILK            | 46d | 28 |
| FBgn0000064 | 429.63  | 47  | 1 | ALQASVLR                | 46d | 28 |
| FBgn0000064 | 650.75  | 65  | 4 | ENIAAGQNELLK            | 46d | 28 |
| FBgn0000064 | 674.15  | 78  | 3 | GILAADESGPTMGK          | 46d | 28 |
| FBgn0000064 | 1195.47 | 85  | 3 | GVVPLFGSEDEVTTQGLDDLAAR | 46d | 28 |
| FBgn0000064 | 1064.94 | 76  | 3 | IVPIVEPEVLPDGDHDLDR     | 46d | 28 |
| FBgn0000064 | 877.61  | 74  | 2 | KNTPEEIALATVQALR        | 46d | 28 |
| FBgn0000064 | 692.84  | 45  | 1 | LAENISGVILFHETLYQK      | 46d | 28 |
| FBgn0000064 | 554.06  | 44  | 1 | LQDIGVENTEDNRR          | 46d | 28 |
| FBgn0000064 | 543.09  | 40  | 2 | NTPEEIALATVQALR         | 46d | 28 |
| FBgn0000064 | 946.17  | 79  | 5 | NTPSYQSILENANVLAR       | 46d | 28 |
| FBgn0000064 | 597.75  | 82  | 3 | VTETVLAAVYK             | 46d | 28 |
| FBgn0000064 | 950.6   | 102 | 3 | YVAGSAGAGSGSLFVANHAY    | 46d | 28 |
| FBgn0000064 | 639.41  | 71  | 2 | ADDGTPFAEILK            | 50d | 28 |
| FBgn0000064 | 650.72  | 58  | 2 | ENIAAGQNELLK            | 50d | 28 |
| FBgn0000064 | 674.24  | 74  | 3 | GILAADESGPTMGK          | 50d | 28 |
| FBgn0000064 | 1195.81 | 82  | 2 | GVVPLFGSEDEVTTQGLDDLAAR | 50d | 28 |
| FBgn0000064 | 1065.14 | 67  | 3 | IVPIVEPEVLPDGDHDLDR     | 50d | 28 |

|             |         |    |   |                         |      |    |
|-------------|---------|----|---|-------------------------|------|----|
| FBgn0000064 | 878.23  | 53 | 2 | KNTPEEIALATVQALR        | 50d  | 28 |
| FBgn0000064 | 752.22  | 73 | 4 | LQDIGVENTEDNR           | 50d  | 28 |
| FBgn0000064 | 543.09  | 48 | 3 | NTPEEIALATVQALR         | 50d  | 28 |
| FBgn0000064 | 945.87  | 79 | 4 | NTPSYQSILENANVLAR       | 50d  | 28 |
| FBgn0000064 | 598.06  | 71 | 2 | VTETVLAAVYK             | 50d  | 28 |
| FBgn0000064 | 639.14  | 68 | 3 | ADDGTPFAEILK            | 52d  | 28 |
| FBgn0000064 | 650.93  | 60 | 5 | ENIAAGQNELLK            | 52d  | 28 |
| FBgn0000064 | 674.38  | 70 | 3 | GILAADESGPTMGK          | 52d  | 28 |
| FBgn0000064 | 1195.59 | 71 | 2 | GVVPLFGSEDEVTTQGLDDLAAR | 52d  | 28 |
| FBgn0000064 | 1064.78 | 72 | 2 | IVPIVEPEVLPDGDHDLDR     | 52d  | 28 |
| FBgn0000064 | 1038.74 | 56 | 2 | LAENISGVILFHETLYQK      | 52d  | 28 |
| FBgn0000064 | 752.19  | 73 | 1 | LQDIGVENTEDNR           | 52d  | 28 |
| FBgn0000064 | 554.04  | 38 | 1 | LQDIGVENTEDNRR          | 52d  | 28 |
| FBgn0000064 | 946.09  | 67 | 2 | NTPSYQSILENANVLAR       | 52d  | 28 |
| FBgn0000064 | 639.28  | 70 | 2 | ADDGTPFAEILK            | 56d  | 28 |
| FBgn0000064 | 650.87  | 50 | 1 | ENIAAGQNELLK            | 56d  | 28 |
| FBgn0000064 | 674.28  | 47 | 1 | GILAADESGPTMGK          | 56d  | 28 |
| FBgn0000064 | 1195.46 | 91 | 5 | GVVPLFGSEDEVTTQGLDDLAAR | 56d  | 28 |
| FBgn0000064 | 1065.14 | 94 | 3 | IVPIVEPEVLPDGDHDLDR     | 56d  | 28 |
| FBgn0000064 | 877.54  | 90 | 3 | KNTPEEIALATVQALR        | 56d  | 28 |
| FBgn0000064 | 752.28  | 65 | 1 | LQDIGVENTEDNR           | 56d  | 28 |
| FBgn0000064 | 813.98  | 50 | 3 | NTPEEIALATVQALR         | 56d  | 28 |
| FBgn0000064 | 945.84  | 93 | 6 | NTPSYQSILENANVLAR       | 56d  | 28 |
| FBgn0000064 | 830.2   | 44 | 1 | RLQDIGVENTEDNR          | 56d  | 28 |
| FBgn0000083 | 465.65  | 38 | 2 | IDYFSER                 | 2d   | 18 |
| FBgn0000083 | 710.28  | 46 | 2 | TIAQFYEQSFGK            | 2d   | 18 |
| FBgn0000083 | 710.38  | 74 | 2 | TIAQFYEQSFGK            | 42d  | 18 |
| FBgn0000083 | 710.03  | 54 | 3 | TIAQFYEQSFGK            | 102d | 18 |
| FBgn0000083 | 710.47  | 64 | 1 | TIAQFYEQSFGK            | 112d | 18 |
| FBgn0000083 | 710.59  | 55 | 2 | TIAQFYEQSFGK            | 122d | 18 |
| FBgn0000083 | 710.09  | 47 | 2 | TIAQFYEQSFGK            | 132d | 18 |
| FBgn0000083 | 710.25  | 58 | 2 | TIAQFYEQSFGK            | 142d | 18 |

|             |         |    |   |                       |      |    |
|-------------|---------|----|---|-----------------------|------|----|
| FBgn0000083 | 710.25  | 63 | 2 | TIAQFYEQSFGK          | 2d   | 28 |
| FBgn0000083 | 710.4   | 71 | 3 | TIAQFYEQSFGK          | 12d  | 28 |
| FBgn0000083 | 710.52  | 66 | 2 | TIAQFYEQSFGK          | 32d  | 28 |
| FBgn0000083 | 710.22  | 78 | 3 | TIAQFYEQSFGK          | 36d  | 28 |
| FBgn0000083 | 710.55  | 73 | 3 | TIAQFYEQSFGK          | 42d  | 28 |
| FBgn0000083 | 710.07  | 50 | 1 | TIAQFYEQSFGK          | 46d  | 28 |
| FBgn0000083 | 710.59  | 58 | 1 | TIAQFYEQSFGK          | 50d  | 28 |
| FBgn0000083 | 1174.74 | 52 | 2 | CTPTVYPADPFDPVEDAAILR | 52d  | 28 |
| FBgn0000083 | 710.47  | 78 | 3 | TIAQFYEQSFGK          | 56d  | 28 |
| FBgn0000084 | 709.39  | 71 | 1 | DLVDDLKDELGGK         | 82d  | 18 |
| FBgn0000084 | 709.43  | 37 | 1 | DLVDDLKDELGGK         | 50d  | 28 |
| FBgn0000084 | 709.61  | 49 | 1 | DLVDDLKDELGGK         | 52d  | 28 |
| FBgn0000084 | 875.12  | 50 | 1 | GFGTDEQEIIDVLVGR      | 56d  | 28 |
| FBgn0000100 | 810.92  | 72 | 1 | FAAAASASAAPAAGGATEK   | 2d   | 18 |
| FBgn0000100 | 912.12  | 64 | 3 | GTIEIINDVPILKPGDK     | 2d   | 18 |
| FBgn0000100 | 911.96  | 50 | 1 | GTIEIINDVPILKPGDK     | 82d  | 18 |
| FBgn0000100 | 912.12  | 69 | 1 | GTIEIINDVPILKPGDK     | 102d | 18 |
| FBgn0000100 | 810.89  | 68 | 3 | FAAAASASAAPAAGGATEK   | 112d | 18 |
| FBgn0000100 | 811.07  | 77 | 2 | FAAAASASAAPAAGGATEK   | 2d   | 28 |
| FBgn0000100 | 912.2   | 92 | 2 | GTIEIINDVPILKPGDK     | 2d   | 28 |
| FBgn0000100 | 912.09  | 59 | 2 | GTIEIINDVPILKPGDK     | 52d  | 28 |
| FBgn0000100 | 912.02  | 82 | 2 | GTIEIINDVPILKPGDK     | 56d  | 28 |
| FBgn0000116 | 851.97  | 68 | 3 | AVQQQLIDDHFLFK        | 2d   | 18 |
| FBgn0000116 | 656.93  | 43 | 2 | EMYDGITELIK           | 2d   | 18 |
| FBgn0000116 | 853.94  | 99 | 3 | GEHTEAEGGVYDISNK      | 2d   | 18 |
| FBgn0000116 | 826.42  | 85 | 1 | IISMQQGGDLGQIYK       | 2d   | 18 |
| FBgn0000116 | 906.68  | 46 | 1 | LGFLTFCPTNLGTTIR      | 2d   | 18 |
| FBgn0000116 | 558.8   | 54 | 3 | LVTAVNEIEK            | 2d   | 18 |
| FBgn0000116 | 636.63  | 68 | 3 | LVTAVNEIEKR           | 2d   | 18 |
| FBgn0000116 | 563.34  | 65 | 5 | MGLTEFEAVK            | 2d   | 18 |
| FBgn0000116 | 1017.93 | 53 | 1 | SMQGYFPNPCLTEAQYK     | 2d   | 18 |
| FBgn0000116 | 860.64  | 63 | 2 | TFLVWCNEEDHLR         | 2d   | 18 |

|             |         |     |   |                                |     |    |
|-------------|---------|-----|---|--------------------------------|-----|----|
| FBgn0000116 | 660.79  | 90  | 6 | VSSTLSGLEGELK                  | 2d  | 18 |
| FBgn0000116 | 397.24  | 42  | 3 | YNLQVR                         | 2d  | 18 |
| FBgn0000116 | 852.19  | 72  | 3 | AVQQQLIDDHFLFK                 | 22d | 18 |
| FBgn0000116 | 656.83  | 51  | 3 | EMYDGITELIK                    | 22d | 18 |
| FBgn0000116 | 543.61  | 38  | 1 | FYPLTGMEK                      | 22d | 18 |
| FBgn0000116 | 853.72  | 108 | 3 | GEHTEAEGGVYDISNK               | 22d | 18 |
| FBgn0000116 | 826.24  | 88  | 4 | IISMQQGGDLGQIYK                | 22d | 18 |
| FBgn0000116 | 906.48  | 40  | 1 | LGFLTFCPTNLGTTIR               | 22d | 18 |
| FBgn0000116 | 558.69  | 50  | 5 | LVTAVNEIEK                     | 22d | 18 |
| FBgn0000116 | 563.44  | 58  | 3 | MGLTEFEAVK                     | 22d | 18 |
| FBgn0000116 | 1017.89 | 64  | 2 | SMQGYFPNCLTEAQYK               | 22d | 18 |
| FBgn0000116 | 860.28  | 38  | 2 | TFLVWCNEEDHLR                  | 22d | 18 |
| FBgn0000116 | 660.66  | 81  | 5 | VSSTLSGLEGELK                  | 22d | 18 |
| FBgn0000116 | 479.99  | 37  | 1 | AKLEEVAAK                      | 42d | 18 |
| FBgn0000116 | 852.18  | 77  | 3 | AVQQQLIDDHFLFK                 | 42d | 18 |
| FBgn0000116 | 656.86  | 57  | 3 | EMYDGITELIK                    | 42d | 18 |
| FBgn0000116 | 543.53  | 45  | 3 | FYPLTGMEK                      | 42d | 18 |
| FBgn0000116 | 853.85  | 85  | 3 | GEHTEAEGGVYDISNK               | 42d | 18 |
| FBgn0000116 | 826.61  | 63  | 1 | IISMQQGGDLGQIYK                | 42d | 18 |
| FBgn0000116 | 1100.02 | 66  | 1 | KTDKHPASNFGDVSTFGNVDPTNEYVISTR | 42d | 18 |
| FBgn0000116 | 906.7   | 51  | 3 | LGFLTFCPTNLGTTIR               | 42d | 18 |
| FBgn0000116 | 558.88  | 50  | 2 | LVTAVNEIEK                     | 42d | 18 |
| FBgn0000116 | 637.1   | 54  | 2 | LVTAVNEIEKR                    | 42d | 18 |
| FBgn0000116 | 563.19  | 59  | 2 | MGLTEFEAVK                     | 42d | 18 |
| FBgn0000116 | 1057.33 | 38  | 1 | TDKHPASNFGDVSTFGNVDPTNEYVISTR  | 42d | 18 |
| FBgn0000116 | 860.51  | 56  | 1 | TFLVWCNEEDHLR                  | 42d | 18 |
| FBgn0000116 | 660.91  | 78  | 3 | VSSTLSGLEGELK                  | 42d | 18 |
| FBgn0000116 | 480.21  | 50  | 1 | AKLEEVAAK                      | 62d | 18 |
| FBgn0000116 | 851.85  | 74  | 3 | AVQQQLIDDHFLFK                 | 62d | 18 |
| FBgn0000116 | 854.03  | 88  | 3 | GEHTEAEGGVYDISNK               | 62d | 18 |
| FBgn0000116 | 559.03  | 46  | 4 | LVTAVNEIEK                     | 62d | 18 |
| FBgn0000116 | 637.1   | 70  | 3 | LVTAVNEIEKR                    | 62d | 18 |



|             |         |     |   |                            |      |    |
|-------------|---------|-----|---|----------------------------|------|----|
| FBgn0000116 | 860.46  | 63  | 1 | TFLVWCNEEDHLR              | 62d  | 18 |
| FBgn0000116 | 661.07  | 99  | 5 | VSSTLSGLEGELK              | 62d  | 18 |
| FBgn0000116 | 397.19  | 45  | 2 | YNLQVR                     | 62d  | 18 |
| FBgn0000116 | 480.32  | 58  | 2 | AKLEEVAAK                  | 82d  | 18 |
| FBgn0000116 | 851.92  | 71  | 4 | AVQQQLIDDHFLFK             | 82d  | 18 |
| FBgn0000116 | 656.64  | 58  | 2 | EMYDGITELIK                | 82d  | 18 |
| FBgn0000116 | 854.06  | 86  | 2 | GEHTEAEGGVYDISNK           | 82d  | 18 |
| FBgn0000116 | 826.53  | 71  | 2 | IISMQQGGDLGQIYK            | 82d  | 18 |
| FBgn0000116 | 558.92  | 44  | 1 | LVTAVNEIEK                 | 82d  | 18 |
| FBgn0000116 | 636.74  | 61  | 1 | LVTAVNEIEKR                | 82d  | 18 |
| FBgn0000116 | 563.09  | 58  | 3 | MGLTEFEAVK                 | 82d  | 18 |
| FBgn0000116 | 660.9   | 95  | 3 | VSSTLSGLEGELK              | 82d  | 18 |
| FBgn0000116 | 397.24  | 42  | 5 | YNLQVR                     | 82d  | 18 |
| FBgn0000116 | 480.52  | 36  | 1 | AKLEEVAAK                  | 102d | 18 |
| FBgn0000116 | 851.37  | 61  | 2 | AVQQQLIDDHFLFK             | 102d | 18 |
| FBgn0000116 | 656.04  | 44  | 2 | EMYDGITELIK                | 102d | 18 |
| FBgn0000116 | 853.7   | 74  | 3 | GEHTEAEGGVYDISNK           | 102d | 18 |
| FBgn0000116 | 942.26  | 43  | 2 | HPASNFGDVSTFGNVDPTNEYVISTR | 102d | 18 |
| FBgn0000116 | 826.57  | 87  | 2 | IISMQQGGDLGQIYK            | 102d | 18 |
| FBgn0000116 | 563.48  | 54  | 4 | MGLTEFEAVK                 | 102d | 18 |
| FBgn0000116 | 487.45  | 37  | 1 | VPFSHDDR                   | 102d | 18 |
| FBgn0000116 | 660.96  | 110 | 6 | VSSTLSGLEGELK              | 102d | 18 |
| FBgn0000116 | 480.34  | 65  | 2 | AKLEEVAAK                  | 112d | 18 |
| FBgn0000116 | 851.99  | 74  | 3 | AVQQQLIDDHFLFK             | 112d | 18 |
| FBgn0000116 | 543.88  | 38  | 1 | FYPLTGMEK                  | 112d | 18 |
| FBgn0000116 | 854.02  | 80  | 1 | GEHTEAEGGVYDISNK           | 112d | 18 |
| FBgn0000116 | 1412.99 | 37  | 2 | HPASNFGDVSTFGNVDPTNEYVISTR | 112d | 18 |
| FBgn0000116 | 826.67  | 94  | 4 | IISMQQGGDLGQIYK            | 112d | 18 |
| FBgn0000116 | 906.59  | 39  | 1 | LGFLTFCPTNLGTTIR           | 112d | 18 |
| FBgn0000116 | 562.98  | 60  | 2 | MGLTEFEAVK                 | 112d | 18 |
| FBgn0000116 | 1017.88 | 39  | 1 | SMQGYFPNPCLTEAQYK          | 112d | 18 |
| FBgn0000116 | 660.98  | 88  | 5 | VSSTLSGLEGELK              | 112d | 18 |

|             |         |    |   |                            |      |    |
|-------------|---------|----|---|----------------------------|------|----|
| FBgn0000116 | 397.13  | 39 | 1 | YNLQVR                     | 112d | 18 |
| FBgn0000116 | 851.43  | 74 | 2 | AVQQQLIDDHFLFK             | 122d | 18 |
| FBgn0000116 | 656.39  | 53 | 2 | EMYDGITELIK                | 122d | 18 |
| FBgn0000116 | 543.68  | 38 | 2 | FYPLTGMEK                  | 122d | 18 |
| FBgn0000116 | 854.03  | 88 | 1 | GEHTEAEGGVYDISNK           | 122d | 18 |
| FBgn0000116 | 826.39  | 78 | 4 | IISMQQGGDLGQIYK            | 122d | 18 |
| FBgn0000116 | 636.76  | 59 | 3 | LVTAVNEIEKR                | 122d | 18 |
| FBgn0000116 | 563.4   | 53 | 1 | MGLTEFEAVK                 | 122d | 18 |
| FBgn0000116 | 1017.37 | 55 | 1 | SMQGYFPNCLTEAQYK           | 122d | 18 |
| FBgn0000116 | 487.23  | 48 | 1 | VPFSDDDR                   | 122d | 18 |
| FBgn0000116 | 660.79  | 76 | 3 | VSSTLSGLEGELK              | 122d | 18 |
| FBgn0000116 | 397.46  | 40 | 2 | YNLQVR                     | 122d | 18 |
| FBgn0000116 | 852.02  | 51 | 2 | AVQQQLIDDHFLFK             | 132d | 18 |
| FBgn0000116 | 543.91  | 35 | 2 | FYPLTGMEK                  | 132d | 18 |
| FBgn0000116 | 854.1   | 81 | 1 | GEHTEAEGGVYDISNK           | 132d | 18 |
| FBgn0000116 | 459.93  | 34 | 1 | GIYHNDAK                   | 132d | 18 |
| FBgn0000116 | 942.36  | 46 | 1 | HPASNFGDVSTFGNVDPTNEYVISTR | 132d | 18 |
| FBgn0000116 | 826.55  | 79 | 4 | IISMQQGGDLGQIYK            | 132d | 18 |
| FBgn0000116 | 637.11  | 47 | 1 | LVTAVNEIEKR                | 132d | 18 |
| FBgn0000116 | 563.43  | 52 | 3 | MGLTEFEAVK                 | 132d | 18 |
| FBgn0000116 | 860.53  | 38 | 1 | TFLVWCNEEDHLR              | 132d | 18 |
| FBgn0000116 | 661.05  | 95 | 2 | VSSTLSGLEGELK              | 132d | 18 |
| FBgn0000116 | 480.23  | 38 | 1 | AKLEEVAAK                  | 142d | 18 |
| FBgn0000116 | 851.05  | 80 | 3 | AVQQQLIDDHFLFK             | 142d | 18 |
| FBgn0000116 | 543.52  | 34 | 1 | FYPLTGMEK                  | 142d | 18 |
| FBgn0000116 | 854.08  | 93 | 3 | GEHTEAEGGVYDISNK           | 142d | 18 |
| FBgn0000116 | 942.41  | 34 | 1 | HPASNFGDVSTFGNVDPTNEYVISTR | 142d | 18 |
| FBgn0000116 | 826.4   | 34 | 1 | IISMQQGGDLGQIYK            | 142d | 18 |
| FBgn0000116 | 906.59  | 56 | 1 | LGFLTFCPTNLGTTIR           | 142d | 18 |
| FBgn0000116 | 563.44  | 51 | 5 | MGLTEFEAVK                 | 142d | 18 |
| FBgn0000116 | 659.88  | 96 | 4 | VSSTLSGLEGELK              | 142d | 18 |
| FBgn0000116 | 397.18  | 37 | 1 | YNLQVR                     | 142d | 18 |

|             |         |    |   |                            |     |    |
|-------------|---------|----|---|----------------------------|-----|----|
| FBgn0000116 | 851.51  | 66 | 4 | AVQQQLIDDHFLFK             | 2d  | 28 |
| FBgn0000116 | 656.94  | 56 | 4 | EMYDGITELIK                | 2d  | 28 |
| FBgn0000116 | 853.86  | 95 | 3 | GEHTEAEGGVYDISNK           | 2d  | 28 |
| FBgn0000116 | 826.28  | 85 | 2 | IISMQQGGDLGQIYK            | 2d  | 28 |
| FBgn0000116 | 906.23  | 51 | 2 | LGFLTFCPTNLGTTIR           | 2d  | 28 |
| FBgn0000116 | 558.68  | 47 | 8 | LVTAVNEIEK                 | 2d  | 28 |
| FBgn0000116 | 637.07  | 64 | 3 | LVTAVNEIEKR                | 2d  | 28 |
| FBgn0000116 | 563.34  | 64 | 6 | MGLTEFEAVK                 | 2d  | 28 |
| FBgn0000116 | 1017.76 | 58 | 3 | SMQGYFPNCLTEAQYK           | 2d  | 28 |
| FBgn0000116 | 860.28  | 62 | 2 | TFLVWCNEEDHLR              | 2d  | 28 |
| FBgn0000116 | 660.33  | 90 | 6 | VSSTLSGLEGELK              | 2d  | 28 |
| FBgn0000116 | 397.11  | 41 | 3 | YNLQVR                     | 2d  | 28 |
| FBgn0000116 | 851.86  | 67 | 3 | AVQQQLIDDHFLFK             | 12d | 28 |
| FBgn0000116 | 656.88  | 62 | 3 | EMYDGITELIK                | 12d | 28 |
| FBgn0000116 | 543.71  | 46 | 3 | FYPLTGMEK                  | 12d | 28 |
| FBgn0000116 | 853.84  | 95 | 2 | GEHTEAEGGVYDISNK           | 12d | 28 |
| FBgn0000116 | 1413.06 | 67 | 3 | HPASNFGDVSTFGNVDPTNEYVISTR | 12d | 28 |
| FBgn0000116 | 826.3   | 90 | 4 | IISMQQGGDLGQIYK            | 12d | 28 |
| FBgn0000116 | 906.38  | 46 | 1 | LGFLTFCPTNLGTTIR           | 12d | 28 |
| FBgn0000116 | 558.98  | 55 | 2 | LVTAVNEIEK                 | 12d | 28 |
| FBgn0000116 | 636.62  | 66 | 2 | LVTAVNEIEKR                | 12d | 28 |
| FBgn0000116 | 563.15  | 64 | 6 | MGLTEFEAVK                 | 12d | 28 |
| FBgn0000116 | 1018.13 | 56 | 1 | SMQGYFPNCLTEAQYK           | 12d | 28 |
| FBgn0000116 | 860.59  | 58 | 2 | TFLVWCNEEDHLR              | 12d | 28 |
| FBgn0000116 | 660.75  | 92 | 6 | VSSTLSGLEGELK              | 12d | 28 |
| FBgn0000116 | 397.23  | 39 | 1 | YNLQVR                     | 12d | 28 |
| FBgn0000116 | 480.41  | 50 | 1 | AKLEEVAAK                  | 22d | 28 |
| FBgn0000116 | 852.04  | 63 | 3 | AVQQQLIDDHFLFK             | 22d | 28 |
| FBgn0000116 | 656.48  | 47 | 2 | EMYDGITELIK                | 22d | 28 |
| FBgn0000116 | 543.85  | 34 | 1 | FYPLTGMEK                  | 22d | 28 |
| FBgn0000116 | 853.78  | 94 | 3 | GEHTEAEGGVYDISNK           | 22d | 28 |
| FBgn0000116 | 826.53  | 90 | 2 | IISMQQGGDLGQIYK            | 22d | 28 |

|             |         |    |   |                            |     |    |
|-------------|---------|----|---|----------------------------|-----|----|
| FBgn0000116 | 558.91  | 45 | 2 | LVTAVNEIEK                 | 22d | 28 |
| FBgn0000116 | 636.7   | 55 | 1 | LVTAVNEIEKR                | 22d | 28 |
| FBgn0000116 | 563.02  | 52 | 2 | MGLTEFEAVK                 | 22d | 28 |
| FBgn0000116 | 1018.08 | 42 | 1 | SMQGYFPNPCLTEAQYK          | 22d | 28 |
| FBgn0000116 | 860.46  | 55 | 1 | TFLVWCNEEDHLR              | 22d | 28 |
| FBgn0000116 | 661     | 76 | 4 | VSSTLSGLEGELK              | 22d | 28 |
| FBgn0000116 | 851.7   | 71 | 3 | AVQQQLIDDHFLFK             | 32d | 28 |
| FBgn0000116 | 656.93  | 49 | 3 | EMYDGITELIK                | 32d | 28 |
| FBgn0000116 | 543.87  | 47 | 1 | FYPLTGMEK                  | 32d | 28 |
| FBgn0000116 | 853.76  | 90 | 3 | GEHTEAEGGVYDISNK           | 32d | 28 |
| FBgn0000116 | 826.22  | 82 | 6 | IISMQQGGDLGQIYK            | 32d | 28 |
| FBgn0000116 | 906.52  | 47 | 1 | LGFLTFCPTNLGTTIR           | 32d | 28 |
| FBgn0000116 | 559.06  | 53 | 6 | LVTAVNEIEK                 | 32d | 28 |
| FBgn0000116 | 636.73  | 76 | 3 | LVTAVNEIEKR                | 32d | 28 |
| FBgn0000116 | 563.5   | 53 | 1 | MGLTEFEAVK                 | 32d | 28 |
| FBgn0000116 | 1017.89 | 44 | 1 | SMQGYFPNPCLTEAQYK          | 32d | 28 |
| FBgn0000116 | 860.32  | 67 | 2 | TFLVWCNEEDHLR              | 32d | 28 |
| FBgn0000116 | 487.25  | 47 | 1 | VPFSDDR                    | 32d | 28 |
| FBgn0000116 | 660.94  | 89 | 5 | VSSTLSGLEGELK              | 32d | 28 |
| FBgn0000116 | 397.39  | 42 | 3 | YNLQVR                     | 32d | 28 |
| FBgn0000116 | 480.15  | 48 | 1 | AKLEEVAAK                  | 36d | 28 |
| FBgn0000116 | 851.88  | 68 | 3 | AVQQQLIDDHFLFK             | 36d | 28 |
| FBgn0000116 | 656.99  | 56 | 6 | EMYDGITELIK                | 36d | 28 |
| FBgn0000116 | 543.87  | 47 | 1 | FYPLTGMEK                  | 36d | 28 |
| FBgn0000116 | 853.73  | 83 | 3 | GEHTEAEGGVYDISNK           | 36d | 28 |
| FBgn0000116 | 942.52  | 37 | 1 | HPASNFGDVSTFGNVDPTNEYVISTR | 36d | 28 |
| FBgn0000116 | 826.28  | 83 | 6 | IISMQQGGDLGQIYK            | 36d | 28 |
| FBgn0000116 | 906.31  | 36 | 1 | LGFLTFCPTNLGTTIR           | 36d | 28 |
| FBgn0000116 | 558.72  | 48 | 4 | LVTAVNEIEK                 | 36d | 28 |
| FBgn0000116 | 636.85  | 62 | 2 | LVTAVNEIEKR                | 36d | 28 |
| FBgn0000116 | 563.16  | 62 | 3 | MGLTEFEAVK                 | 36d | 28 |
| FBgn0000116 | 1018.04 | 37 | 1 | SMQGYFPNPCLTEAQYK          | 36d | 28 |

|             |         |     |   |                                |     |    |
|-------------|---------|-----|---|--------------------------------|-----|----|
| FBgn0000116 | 860.38  | 51  | 1 | TFLVWCNEEDHLR                  | 36d | 28 |
| FBgn0000116 | 660.66  | 88  | 5 | VSSTLSGLEGELK                  | 36d | 28 |
| FBgn0000116 | 397.14  | 37  | 1 | YNLQVR                         | 36d | 28 |
| FBgn0000116 | 480.32  | 51  | 2 | AKLEEVAAK                      | 42d | 28 |
| FBgn0000116 | 851.89  | 66  | 3 | AVQQQLIDDHFLFK                 | 42d | 28 |
| FBgn0000116 | 656.55  | 59  | 3 | EMYDGITELIK                    | 42d | 28 |
| FBgn0000116 | 433.27  | 41  | 1 | EVFDNLK                        | 42d | 28 |
| FBgn0000116 | 543.66  | 41  | 2 | FYPLTGMEK                      | 42d | 28 |
| FBgn0000116 | 853.82  | 86  | 3 | GEHTEAEGGVYDISNK               | 42d | 28 |
| FBgn0000116 | 1412.98 | 43  | 2 | HPASNFGDVSTFGNVDPTNEYVISTR     | 42d | 28 |
| FBgn0000116 | 826.52  | 92  | 3 | IISMQQGGDLGQIYK                | 42d | 28 |
| FBgn0000116 | 906.56  | 56  | 1 | LGFLTFCPTNLGTTIR               | 42d | 28 |
| FBgn0000116 | 558.82  | 52  | 5 | LVTAVNEIEK                     | 42d | 28 |
| FBgn0000116 | 636.77  | 68  | 3 | LVTAVNEIEKR                    | 42d | 28 |
| FBgn0000116 | 563.07  | 54  | 2 | MGLTEFEAVK                     | 42d | 28 |
| FBgn0000116 | 1018.17 | 52  | 2 | SMQGYPFNPCLTEAQYK              | 42d | 28 |
| FBgn0000116 | 1057.26 | 76  | 2 | TDKHPASNFGDVSTFGNVDPTNEYVISTR  | 42d | 28 |
| FBgn0000116 | 860.28  | 54  | 1 | TFLVWCNEEDHLR                  | 42d | 28 |
| FBgn0000116 | 660.99  | 79  | 4 | VSSTLSGLEGELK                  | 42d | 28 |
| FBgn0000116 | 397.03  | 39  | 2 | YNLQVR                         | 42d | 28 |
| FBgn0000116 | 480.15  | 44  | 1 | AKLEEVAAK                      | 46d | 28 |
| FBgn0000116 | 851.97  | 63  | 3 | AVQQQLIDDHFLFK                 | 46d | 28 |
| FBgn0000116 | 656.99  | 54  | 3 | EMYDGITELIK                    | 46d | 28 |
| FBgn0000116 | 543.99  | 53  | 2 | FYPLTGMEK                      | 46d | 28 |
| FBgn0000116 | 853.68  | 99  | 3 | GEHTEAEGGVYDISNK               | 46d | 28 |
| FBgn0000116 | 1413.36 | 41  | 3 | HPASNFGDVSTFGNVDPTNEYVISTR     | 46d | 28 |
| FBgn0000116 | 826.5   | 104 | 3 | IISMQQGGDLGQIYK                | 46d | 28 |
| FBgn0000116 | 1099.82 | 42  | 1 | KTDKHPASNFGDVSTFGNVDPTNEYVISTR | 46d | 28 |
| FBgn0000116 | 558.76  | 47  | 3 | LVTAVNEIEK                     | 46d | 28 |
| FBgn0000116 | 636.79  | 71  | 2 | LVTAVNEIEKR                    | 46d | 28 |
| FBgn0000116 | 563.13  | 62  | 6 | MGLTEFEAVK                     | 46d | 28 |
| FBgn0000116 | 1018.13 | 58  | 3 | SMQGYPFNPCLTEAQYK              | 46d | 28 |

|             |         |     |   |                  |     |    |
|-------------|---------|-----|---|------------------|-----|----|
| FBgn0000116 | 860.22  | 73  | 3 | TFLVWCNEEDHLR    | 46d | 28 |
| FBgn0000116 | 661.04  | 97  | 5 | VSSTLSGLEGELK    | 46d | 28 |
| FBgn0000116 | 397.38  | 37  | 2 | YNLQVR           | 46d | 28 |
| FBgn0000116 | 852.06  | 65  | 3 | AVQQQLIDDHFLFK   | 50d | 28 |
| FBgn0000116 | 656.78  | 55  | 4 | EMYDGITELIK      | 50d | 28 |
| FBgn0000116 | 543.67  | 41  | 2 | FYPLTGMEK        | 50d | 28 |
| FBgn0000116 | 853.91  | 86  | 3 | GEHTEAEGGVYDISNK | 50d | 28 |
| FBgn0000116 | 826.28  | 88  | 6 | IISMQQGGDLGQIYK  | 50d | 28 |
| FBgn0000116 | 906.37  | 66  | 3 | LGFLTFCPTNLGTTIR | 50d | 28 |
| FBgn0000116 | 558.98  | 50  | 5 | LVTAVNEIEK       | 50d | 28 |
| FBgn0000116 | 636.73  | 52  | 1 | LVTAVNEIEKR      | 50d | 28 |
| FBgn0000116 | 563.01  | 63  | 2 | MGLTEFEAVK       | 50d | 28 |
| FBgn0000116 | 1017.92 | 60  | 1 | SMQGYFPNCLTEAQYK | 50d | 28 |
| FBgn0000116 | 860.29  | 62  | 3 | TFLVWCNEEDHLR    | 50d | 28 |
| FBgn0000116 | 660.92  | 98  | 4 | VSSTLSGLEGELK    | 50d | 28 |
| FBgn0000116 | 852.05  | 70  | 3 | AVQQQLIDDHFLFK   | 52d | 28 |
| FBgn0000116 | 656.6   | 52  | 3 | EMYDGITELIK      | 52d | 28 |
| FBgn0000116 | 543.91  | 51  | 3 | FYPLTGMEK        | 52d | 28 |
| FBgn0000116 | 853.83  | 92  | 3 | GEHTEAEGGVYDISNK | 52d | 28 |
| FBgn0000116 | 826.43  | 109 | 2 | IISMQQGGDLGQIYK  | 52d | 28 |
| FBgn0000116 | 906.7   | 69  | 3 | LGFLTFCPTNLGTTIR | 52d | 28 |
| FBgn0000116 | 558.6   | 53  | 5 | LVTAVNEIEK       | 52d | 28 |
| FBgn0000116 | 636.76  | 67  | 2 | LVTAVNEIEKR      | 52d | 28 |
| FBgn0000116 | 563.2   | 62  | 3 | MGLTEFEAVK       | 52d | 28 |
| FBgn0000116 | 1017.91 | 51  | 2 | SMQGYFPNCLTEAQYK | 52d | 28 |
| FBgn0000116 | 860.44  | 60  | 6 | TFLVWCNEEDHLR    | 52d | 28 |
| FBgn0000116 | 487.04  | 44  | 1 | VPFSHDDR         | 52d | 28 |
| FBgn0000116 | 660.88  | 114 | 5 | VSSTLSGLEGELK    | 52d | 28 |
| FBgn0000116 | 480.38  | 64  | 2 | AKLEEVAAK        | 56d | 28 |
| FBgn0000116 | 851.99  | 61  | 2 | AVQQQLIDDHFLFK   | 56d | 28 |
| FBgn0000116 | 656.9   | 56  | 4 | EMYDGITELIK      | 56d | 28 |
| FBgn0000116 | 853.69  | 86  | 4 | GEHTEAEGGVYDISNK | 56d | 28 |

|             |         |     |   |                          |      |    |
|-------------|---------|-----|---|--------------------------|------|----|
| FBgn0000116 | 826.29  | 85  | 5 | IISMQQGGDLGQIYK          | 56d  | 28 |
| FBgn0000116 | 906.54  | 64  | 5 | LGFLTFCPTNLGTTIR         | 56d  | 28 |
| FBgn0000116 | 558.83  | 51  | 2 | LVTAVNEIEK               | 56d  | 28 |
| FBgn0000116 | 636.94  | 61  | 3 | LVTAVNEIEKR              | 56d  | 28 |
| FBgn0000116 | 563.24  | 49  | 2 | MGLTEFEAVK               | 56d  | 28 |
| FBgn0000116 | 860.38  | 57  | 1 | TFLVWCNEEDHLR            | 56d  | 28 |
| FBgn0000116 | 487.35  | 55  | 2 | VPFSHDDR                 | 56d  | 28 |
| FBgn0000116 | 660.81  | 118 | 5 | VSSTLSGLEGELK            | 56d  | 28 |
| FBgn0000117 | 1324.1  | 65  | 2 | SETEASEQVQPEDEDLDAITPNTK | 112d | 18 |
| FBgn0000117 | 1324.01 | 36  | 1 | SETEASEQVQPEDEDLDAITPNTK | 132d | 18 |
| FBgn0000117 | 1324.28 | 46  | 1 | SETEASEQVQPEDEDLDAITPNTK | 142d | 18 |
| FBgn0000120 | 1024.23 | 48  | 1 | KDFLLSPGELELEVTLDK       | 2d   | 18 |
| FBgn0000120 | 817.82  | 59  | 3 | DTALASTTLIASQDAR         | 42d  | 18 |
| FBgn0000120 | 817.32  | 67  | 1 | DTALASTTLIASQDAR         | 102d | 18 |
| FBgn0000120 | 1024.3  | 47  | 1 | KDFLLSPGELELEVTLDK       | 102d | 18 |
| FBgn0000120 | 818.16  | 49  | 1 | DTALASTTLIASQDAR         | 112d | 18 |
| FBgn0000120 | 817.19  | 88  | 1 | DTALASTTLIASQDAR         | 122d | 18 |
| FBgn0000120 | 1191.63 | 59  | 1 | NTIAFMETSEGCPNPGSSLQK    | 132d | 18 |
| FBgn0000120 | 817.77  | 73  | 1 | DTALASTTLIASQDAR         | 142d | 18 |
| FBgn0000120 | 1191.34 | 35  | 1 | NTIAFMETSEGCPNPGSSLQK    | 2d   | 28 |
| FBgn0000120 | 1369.12 | 38  | 1 | DFVDSVTQVEPIDGIIVLDDEYVR | 12d  | 28 |
| FBgn0000120 | 1024.24 | 49  | 2 | KDFLLSPGELELEVTLDK       | 12d  | 28 |
| FBgn0000120 | 1191.58 | 37  | 1 | NTIAFMETSEGCPNPGSSLQK    | 12d  | 28 |
| FBgn0000120 | 1191.37 | 74  | 1 | NTIAFMETSEGCPNPGSSLQK    | 32d  | 28 |
| FBgn0000120 | 727.83  | 46  | 1 | YGREDDEMIGLR             | 32d  | 28 |
| FBgn0000120 | 1191.43 | 64  | 1 | NTIAFMETSEGCPNPGSSLQK    | 36d  | 28 |
| FBgn0000120 | 727.79  | 47  | 1 | YGREDDEMIGLR             | 36d  | 28 |
| FBgn0000120 | 1369.17 | 57  | 1 | DFVDSVTQVEPIDGIIVLDDEYVR | 42d  | 28 |
| FBgn0000120 | 727.74  | 77  | 3 | YGREDDEMIGLR             | 42d  | 28 |
| FBgn0000120 | 727.86  | 62  | 3 | YGREDDEMIGLR             | 46d  | 28 |
| FBgn0000120 | 1191.75 | 55  | 2 | NTIAFMETSEGCPNPGSSLQK    | 52d  | 28 |
| FBgn0000121 | 556.16  | 45  | 1 | AFVGDSEDDR               | 2d   | 18 |

|             |         |    |   |                          |      |    |
|-------------|---------|----|---|--------------------------|------|----|
| FBgn0000121 | 1419.23 | 52 | 2 | DFIDHIDYCDPVDGVIVVEPDYLK | 2d   | 18 |
| FBgn0000121 | 1125.09 | 87 | 2 | EQIVPMTNPNMEMTPMQEK      | 2d   | 18 |
| FBgn0000121 | 1027.84 | 75 | 2 | GYQDDDDNIVFEDFAK         | 2d   | 18 |
| FBgn0000121 | 584.49  | 50 | 2 | LLQPAPGTIEK              | 2d   | 18 |
| FBgn0000121 | 611     | 75 | 2 | TAATVQVSNNSK             | 2d   | 18 |
| FBgn0000121 | 578.88  | 36 | 1 | VFGQLATTYR               | 2d   | 18 |
| FBgn0000121 | 1027.75 | 65 | 3 | GYQDDDDNIVFEDFAK         | 22d  | 18 |
| FBgn0000121 | 584.49  | 45 | 1 | LLQPAPGTIEK              | 22d  | 18 |
| FBgn0000121 | 934.37  | 54 | 2 | LNCGTLGGEMQTDVPFK        | 22d  | 18 |
| FBgn0000121 | 706.95  | 53 | 2 | YGREDEVMGVK              | 22d  | 18 |
| FBgn0000121 | 1027.92 | 86 | 3 | GYQDDDDNIVFEDFAK         | 42d  | 18 |
| FBgn0000121 | 463.72  | 39 | 1 | HVAQLETK                 | 42d  | 18 |
| FBgn0000121 | 584.24  | 45 | 1 | LLQPAPGTIEK              | 42d  | 18 |
| FBgn0000121 | 610.75  | 75 | 3 | TAATVQVSNNSK             | 42d  | 18 |
| FBgn0000121 | 556.14  | 43 | 1 | AFVGDSEDDR               | 62d  | 18 |
| FBgn0000121 | 1419.29 | 44 | 1 | DFIDHIDYCDPVDGVIVVEPDYLK | 62d  | 18 |
| FBgn0000121 | 1028.04 | 89 | 2 | GYQDDDDNIVFEDFAK         | 62d  | 18 |
| FBgn0000121 | 463.74  | 39 | 2 | HVAQLETK                 | 62d  | 18 |
| FBgn0000121 | 584.35  | 48 | 2 | LLQPAPGTIEK              | 62d  | 18 |
| FBgn0000121 | 610.91  | 68 | 4 | TAATVQVSNNSK             | 62d  | 18 |
| FBgn0000121 | 1027.77 | 77 | 3 | GYQDDDDNIVFEDFAK         | 82d  | 18 |
| FBgn0000121 | 610.79  | 80 | 1 | TAATVQVSNNSK             | 82d  | 18 |
| FBgn0000121 | 1419.37 | 64 | 1 | DFIDHIDYCDPVDGVIVVEPDYLK | 102d | 18 |
| FBgn0000121 | 1028.06 | 89 | 1 | GYQDDDDNIVFEDFAK         | 102d | 18 |
| FBgn0000121 | 934.65  | 40 | 1 | LNCGTLGGEMQTDVPFK        | 102d | 18 |
| FBgn0000121 | 946.38  | 45 | 1 | DFIDHIDYCDPVDGVIVVEPDYLK | 112d | 18 |
| FBgn0000121 | 1028.03 | 81 | 4 | GYQDDDDNIVFEDFAK         | 112d | 18 |
| FBgn0000121 | 463.52  | 53 | 4 | HVAQLETK                 | 112d | 18 |
| FBgn0000121 | 584.38  | 43 | 1 | LLQPAPGTIEK              | 112d | 18 |
| FBgn0000121 | 934.69  | 52 | 1 | LNCGTLGGEMQTDVPFK        | 112d | 18 |
| FBgn0000121 | 610.66  | 61 | 4 | TAATVQVSNNSK             | 112d | 18 |
| FBgn0000121 | 1125.15 | 39 | 1 | EQIVPMTNPNMEMTPMQEK      | 122d | 18 |



|             |         |     |   |                        |      |    |
|-------------|---------|-----|---|------------------------|------|----|
| FBgn0000121 | 1027.96 | 77  | 4 | GYQDDDDNIVFEDFAK       | 122d | 18 |
| FBgn0000121 | 934.46  | 40  | 1 | LNCGTLGGEMQTDVPFK      | 122d | 18 |
| FBgn0000121 | 610.77  | 63  | 2 | TAATVQVSNNSK           | 122d | 18 |
| FBgn0000121 | 1028.03 | 66  | 3 | GYQDDDDNIVFEDFAK       | 132d | 18 |
| FBgn0000121 | 584.35  | 37  | 1 | LLQPAPGTIEK            | 132d | 18 |
| FBgn0000121 | 610.73  | 38  | 1 | TAATVQVSNNSK           | 132d | 18 |
| FBgn0000121 | 1028.01 | 71  | 1 | GYQDDDDNIVFEDFAK       | 142d | 18 |
| FBgn0000121 | 610.97  | 66  | 2 | TAATVQVSNNSK           | 142d | 18 |
| FBgn0000121 | 556.08  | 47  | 2 | AFVGSEDDR              | 2d   | 28 |
| FBgn0000121 | 679.68  | 49  | 2 | EGCPITPGANLTK          | 2d   | 28 |
| FBgn0000121 | 1027.9  | 84  | 3 | GYQDDDDNIVFEDFAK       | 2d   | 28 |
| FBgn0000121 | 584.11  | 45  | 5 | LLQPAPGTIEK            | 2d   | 28 |
| FBgn0000121 | 488.33  | 35  | 1 | LQYAPLNR               | 2d   | 28 |
| FBgn0000121 | 610.86  | 85  | 5 | TAATVQVSNNSK           | 2d   | 28 |
| FBgn0000121 | 578.87  | 40  | 1 | VFGQLATTYR             | 2d   | 28 |
| FBgn0000121 | 1419.05 | 41  | 1 | DFIDHIDYCDPVDGIVVEPDYK | 12d  | 28 |
| FBgn0000121 | 1124.96 | 51  | 2 | EQIVPMTNPNMEMTPMQEK    | 12d  | 28 |
| FBgn0000121 | 1027.82 | 69  | 1 | GYQDDDDNIVFEDFAK       | 12d  | 28 |
| FBgn0000121 | 584.3   | 46  | 2 | LLQPAPGTIEK            | 12d  | 28 |
| FBgn0000121 | 934.56  | 67  | 2 | LNCGTLGGEMQTDVPFK      | 12d  | 28 |
| FBgn0000121 | 610.57  | 83  | 3 | TAATVQVSNNSK           | 12d  | 28 |
| FBgn0000121 | 578.77  | 63  | 3 | VFGQLATTYR             | 12d  | 28 |
| FBgn0000121 | 682.74  | 46  | 1 | TFYLIPLAANK            | 22d  | 28 |
| FBgn0000121 | 706.92  | 53  | 2 | YGREEDEVMGVK           | 22d  | 28 |
| FBgn0000121 | 1124.89 | 68  | 1 | EQIVPMTNPNMEMTPMQEK    | 32d  | 28 |
| FBgn0000121 | 1027.72 | 66  | 2 | GYQDDDDNIVFEDFAK       | 32d  | 28 |
| FBgn0000121 | 584.14  | 35  | 1 | LLQPAPGTIEK            | 32d  | 28 |
| FBgn0000121 | 934.48  | 80  | 2 | LNCGTLGGEMQTDVPFK      | 32d  | 28 |
| FBgn0000121 | 706.61  | 71  | 3 | YGREEDEVMGVK           | 32d  | 28 |
| FBgn0000121 | 1028.16 | 90  | 2 | GYQDDDDNIVFEDFAK       | 36d  | 28 |
| FBgn0000121 | 584.18  | 45  | 1 | LLQPAPGTIEK            | 36d  | 28 |
| FBgn0000121 | 934.25  | 100 | 3 | LNCGTLGGEMQTDVPFK      | 36d  | 28 |

|             |         |    |   |                     |     |    |
|-------------|---------|----|---|---------------------|-----|----|
| FBgn0000121 | 706.96  | 59 | 1 | YGREEDEVMGVK        | 36d | 28 |
| FBgn0000121 | 1028.03 | 78 | 3 | GYQDDDDNIVFEDFAK    | 42d | 28 |
| FBgn0000121 | 463.91  | 43 | 1 | HVAQLETK            | 42d | 28 |
| FBgn0000121 | 584.42  | 43 | 3 | LLQPAPGTIEK         | 42d | 28 |
| FBgn0000121 | 934.43  | 55 | 3 | LNCGTLGGEMQTDVPFK   | 42d | 28 |
| FBgn0000121 | 610.84  | 69 | 6 | TAATVQVSNNSK        | 42d | 28 |
| FBgn0000121 | 579.03  | 56 | 1 | VFGQLATTYR          | 42d | 28 |
| FBgn0000121 | 707     | 49 | 1 | YGREEDEVMGVK        | 42d | 28 |
| FBgn0000121 | 556.27  | 47 | 1 | AFVGDSEDDR          | 46d | 28 |
| FBgn0000121 | 1028    | 85 | 1 | GYQDDDDNIVFEDFAK    | 46d | 28 |
| FBgn0000121 | 584.31  | 40 | 1 | LLQPAPGTIEK         | 46d | 28 |
| FBgn0000121 | 934.41  | 63 | 2 | LNCGTLGGEMQTDVPFK   | 46d | 28 |
| FBgn0000121 | 706.76  | 49 | 1 | YGREEDEVMGVK        | 46d | 28 |
| FBgn0000121 | 1124.94 | 45 | 1 | EQIVPMTNPNMEMTPMQEK | 50d | 28 |
| FBgn0000121 | 1027.87 | 68 | 3 | GYQDDDDNIVFEDFAK    | 50d | 28 |
| FBgn0000121 | 584.47  | 49 | 2 | LLQPAPGTIEK         | 50d | 28 |
| FBgn0000121 | 934.41  | 51 | 1 | LNCGTLGGEMQTDVPFK   | 50d | 28 |
| FBgn0000121 | 610.77  | 59 | 3 | TAATVQVSNNSK        | 50d | 28 |
| FBgn0000121 | 1028.11 | 73 | 3 | GYQDDDDNIVFEDFAK    | 52d | 28 |
| FBgn0000121 | 934.39  | 67 | 1 | LNCGTLGGEMQTDVPFK   | 52d | 28 |
| FBgn0000121 | 1028.18 | 73 | 5 | GYQDDDDNIVFEDFAK    | 56d | 28 |
| FBgn0000121 | 584.36  | 45 | 2 | LLQPAPGTIEK         | 56d | 28 |
| FBgn0000121 | 610.94  | 73 | 3 | TAATVQVSNNSK        | 56d | 28 |
| FBgn0000150 | 558.44  | 43 | 2 | ELVTWTPAAK          | 2d  | 18 |
| FBgn0000150 | 735.83  | 62 | 3 | NIIHGSDAVESA EK     | 2d  | 18 |
| FBgn0000150 | 871.8   | 63 | 2 | QMLGATNPADSLPGTIR   | 2d  | 18 |
| FBgn0000150 | 696.38  | 61 | 3 | TFIMVKPDGVQR        | 2d  | 18 |
| FBgn0000150 | 871.82  | 74 | 2 | QMLGATNPADSLPGTIR   | 22d | 18 |
| FBgn0000150 | 696.45  | 53 | 1 | TFIMVKPDGVQR        | 22d | 18 |
| FBgn0000150 | 735.62  | 58 | 3 | NIIHGSDAVESA EK     | 42d | 18 |
| FBgn0000150 | 872.11  | 61 | 3 | QMLGATNPADSLPGTIR   | 42d | 18 |
| FBgn0000150 | 696.19  | 54 | 3 | TFIMVKPDGVQR        | 42d | 18 |

|             |        |    |   |                   |      |    |
|-------------|--------|----|---|-------------------|------|----|
| FBgn0000150 | 559.05 | 35 | 1 | ELVTWTPAAK        | 62d  | 18 |
| FBgn0000150 | 735.96 | 60 | 3 | NIIHGSDAVESA EK   | 62d  | 18 |
| FBgn0000150 | 558.66 | 39 | 1 | ELVTWTPAAK        | 82d  | 18 |
| FBgn0000150 | 736.08 | 58 | 2 | NIIHGSDAVESA EK   | 82d  | 18 |
| FBgn0000150 | 735.99 | 65 | 1 | NIIHGSDAVESA EK   | 102d | 18 |
| FBgn0000150 | 871.84 | 49 | 3 | QMLGATNPADSLPGTIR | 102d | 18 |
| FBgn0000150 | 872    | 47 | 1 | QMLGATNPADSLPGTIR | 112d | 18 |
| FBgn0000150 | 735.85 | 56 | 3 | NIIHGSDAVESA EK   | 122d | 18 |
| FBgn0000150 | 872.19 | 78 | 3 | QMLGATNPADSLPGTIR | 122d | 18 |
| FBgn0000150 | 696.59 | 54 | 2 | TFIMVKPDGVQR      | 122d | 18 |
| FBgn0000150 | 696.55 | 54 | 1 | TFIMVKPDGVQR      | 132d | 18 |
| FBgn0000150 | 490.99 | 37 | 1 | NIIHGSDAVESA EK   | 142d | 18 |
| FBgn0000150 | 558.83 | 39 | 2 | ELVTWTPAAK        | 2d   | 28 |
| FBgn0000150 | 735.6  | 67 | 3 | NIIHGSDAVESA EK   | 2d   | 28 |
| FBgn0000150 | 871.91 | 79 | 3 | QMLGATNPADSLPGTIR | 2d   | 28 |
| FBgn0000150 | 696.21 | 54 | 3 | TFIMVKPDGVQR      | 2d   | 28 |
| FBgn0000150 | 558.56 | 44 | 1 | ELVTWTPAAK        | 12d  | 28 |
| FBgn0000150 | 736.1  | 83 | 3 | NIIHGSDAVESA EK   | 12d  | 28 |
| FBgn0000150 | 871.86 | 72 | 1 | QMLGATNPADSLPGTIR | 12d  | 28 |
| FBgn0000150 | 735.73 | 63 | 1 | NIIHGSDAVESA EK   | 22d  | 28 |
| FBgn0000150 | 871.65 | 63 | 2 | QMLGATNPADSLPGTIR | 22d  | 28 |
| FBgn0000150 | 696.51 | 72 | 3 | TFIMVKPDGVQR      | 22d  | 28 |
| FBgn0000150 | 735.76 | 62 | 3 | NIIHGSDAVESA EK   | 32d  | 28 |
| FBgn0000150 | 871.78 | 75 | 1 | QMLGATNPADSLPGTIR | 32d  | 28 |
| FBgn0000150 | 696.31 | 54 | 3 | TFIMVKPDGVQR      | 32d  | 28 |
| FBgn0000150 | 558.82 | 36 | 1 | ELVTWTPAAK        | 36d  | 28 |
| FBgn0000150 | 490.87 | 42 | 1 | NIIHGSDAVESA EK   | 36d  | 28 |
| FBgn0000150 | 872.01 | 59 | 1 | QMLGATNPADSLPGTIR | 36d  | 28 |
| FBgn0000150 | 696.45 | 60 | 3 | TFIMVKPDGVQR      | 36d  | 28 |
| FBgn0000150 | 558.98 | 43 | 2 | ELVTWTPAAK        | 42d  | 28 |
| FBgn0000150 | 735.63 | 70 | 3 | NIIHGSDAVESA EK   | 42d  | 28 |
| FBgn0000150 | 872.14 | 73 | 2 | QMLGATNPADSLPGTIR | 42d  | 28 |

|             |         |     |   |                                     |     |    |
|-------------|---------|-----|---|-------------------------------------|-----|----|
| FBgn0000150 | 696.44  | 55  | 3 | TFIMVKPDGVQR                        | 42d | 28 |
| FBgn0000150 | 735.65  | 70  | 2 | NIIHGSDAVESA EK                     | 46d | 28 |
| FBgn0000150 | 871.97  | 93  | 2 | QMLGATNPADSLPGTIR                   | 46d | 28 |
| FBgn0000150 | 696.37  | 55  | 3 | TFIMVKPDGVQR                        | 46d | 28 |
| FBgn0000150 | 735.65  | 63  | 3 | NIIHGSDAVESA EK                     | 50d | 28 |
| FBgn0000150 | 872.04  | 62  | 2 | QMLGATNPADSLPGTIR                   | 50d | 28 |
| FBgn0000150 | 696.41  | 58  | 3 | TFIMVKPDGVQR                        | 50d | 28 |
| FBgn0000150 | 872.17  | 78  | 1 | QMLGATNPADSLPGTIR                   | 52d | 28 |
| FBgn0000150 | 696.57  | 58  | 3 | TFIMVKPDGVQR                        | 52d | 28 |
| FBgn0000150 | 735.67  | 56  | 1 | NIIHGSDAVESA EK                     | 56d | 28 |
| FBgn0000150 | 871.99  | 42  | 1 | QMLGATNPADSLPGTIR                   | 56d | 28 |
| FBgn0000165 | 1247.01 | 34  | 1 | EVPITNISQIFPSNFVEPSAFR              | 2d  | 18 |
| FBgn0000165 | 908.51  | 101 | 2 | IPIQELSNVPSLEFTK                    | 2d  | 18 |
| FBgn0000165 | 1009.15 | 37  | 1 | RLPNANLTELVGAFGNMAK                 | 2d  | 18 |
| FBgn0000165 | 908.45  | 81  | 1 | IPIQELSNVPSLEFTK                    | 22d | 18 |
| FBgn0000165 | 908.57  | 49  | 2 | IPIQELSNVPSLEFTK                    | 42d | 18 |
| FBgn0000165 | 908.65  | 82  | 2 | IPIQELSNVPSLEFTK                    | 2d  | 28 |
| FBgn0000165 | 873.15  | 55  | 1 | VLAAIDQGYVEDSSGNRIPLDEV R           | 2d  | 28 |
| FBgn0000165 | 1246.99 | 39  | 1 | EVPITNISQIFPSNFVEPSAFR              | 12d | 28 |
| FBgn0000165 | 908.53  | 88  | 1 | IPIQELSNVPSLEFTK                    | 12d | 28 |
| FBgn0000173 | 1106.01 | 63  | 2 | YFHVIVTGPNDSPFEGGVFK                | 2d  | 18 |
| FBgn0000173 | 1106.29 | 59  | 1 | YFHVIVTGPNDSPFEGGVFK                | 22d | 18 |
| FBgn0000173 | 737.74  | 43  | 1 | YFHVIVTGPNDSPFEGGVFK                | 62d | 18 |
| FBgn0000173 | 1106.05 | 45  | 1 | YFHVIVTGPNDSPFEGGVFK                | 2d  | 28 |
| FBgn0000173 | 1106.09 | 50  | 1 | YFHVIVTGPNDSPFEGGVFK                | 12d | 28 |
| FBgn0000181 | 678.99  | 37  | 1 | NDGTVIHFNNPK                        | 2d  | 18 |
| FBgn0000181 | 1661.7  | 54  | 1 | SGAGGAAGSSAADAGDDDVPDLVENFEEVAIADTK | 2d  | 18 |
| FBgn0000181 | 1205.59 | 38  | 1 | TITEMVPGILTQLGPQDINQLK              | 36d | 28 |
| FBgn0000181 | 1661.77 | 36  | 2 | SGAGGAAGSSAADAGDDDVPDLVENFEEVAIADTK | 52d | 28 |
| FBgn0000181 | 1205.68 | 47  | 1 | TITEMVPGILTQLGPQDINQLK              | 52d | 28 |
| FBgn0000253 | 1240.59 | 89  | 1 | EADIDGDGQVNYEEFVTMMTSK              | 2d  | 18 |
| FBgn0000253 | 923.66  | 83  | 6 | EAFSLFDKDGDTITTK                    | 2d  | 18 |

|             |         |     |   |                        |      |    |
|-------------|---------|-----|---|------------------------|------|----|
| FBgn0000253 | 675.5   | 78  | 5 | LTDEEVDEMIR            | 2d   | 18 |
| FBgn0000253 | 870.42  | 57  | 3 | VFDKDGNGFISAAELR       | 2d   | 18 |
| FBgn0000253 | 615.87  | 68  | 2 | EAFSLFDKDGDTITTK       | 22d  | 18 |
| FBgn0000253 | 675.89  | 66  | 4 | LTDEEVDEMIR            | 22d  | 18 |
| FBgn0000253 | 870.58  | 85  | 3 | VFDKDGNGFISAAELR       | 22d  | 18 |
| FBgn0000253 | 923.37  | 76  | 3 | EAFSLFDKDGDTITTK       | 42d  | 18 |
| FBgn0000253 | 515.36  | 39  | 2 | HVMTNLGEK              | 42d  | 18 |
| FBgn0000253 | 675.79  | 78  | 5 | LTDEEVDEMIR            | 42d  | 18 |
| FBgn0000253 | 870.58  | 101 | 3 | VFDKDGNGFISAAELR       | 42d  | 18 |
| FBgn0000253 | 479.46  | 41  | 1 | EAFSLFDK               | 62d  | 18 |
| FBgn0000253 | 923.67  | 81  | 3 | EAFSLFDKDGDTITTK       | 62d  | 18 |
| FBgn0000253 | 515.46  | 42  | 1 | HVMTNLGEK              | 62d  | 18 |
| FBgn0000253 | 676.02  | 65  | 1 | LTDEEVDEMIR            | 62d  | 18 |
| FBgn0000253 | 870.56  | 100 | 2 | VFDKDGNGFISAAELR       | 62d  | 18 |
| FBgn0000253 | 923.69  | 87  | 4 | EAFSLFDKDGDTITTK       | 82d  | 18 |
| FBgn0000253 | 675.88  | 72  | 2 | LTDEEVDEMIR            | 82d  | 18 |
| FBgn0000253 | 870.59  | 98  | 1 | VFDKDGNGFISAAELR       | 82d  | 18 |
| FBgn0000253 | 922.39  | 79  | 3 | EAFSLFDKDGDTITTK       | 102d | 18 |
| FBgn0000253 | 676     | 75  | 2 | LTDEEVDEMIR            | 102d | 18 |
| FBgn0000253 | 870.38  | 78  | 1 | VFDKDGNGFISAAELR       | 102d | 18 |
| FBgn0000253 | 923.19  | 91  | 2 | EAFSLFDKDGDTITTK       | 112d | 18 |
| FBgn0000253 | 675.92  | 78  | 4 | LTDEEVDEMIR            | 112d | 18 |
| FBgn0000253 | 870.56  | 98  | 3 | VFDKDGNGFISAAELR       | 112d | 18 |
| FBgn0000253 | 479.06  | 36  | 1 | EAFSLFDK               | 122d | 18 |
| FBgn0000253 | 923.68  | 64  | 2 | EAFSLFDKDGDTITTK       | 122d | 18 |
| FBgn0000253 | 675.94  | 78  | 2 | LTDEEVDEMIR            | 122d | 18 |
| FBgn0000253 | 870.47  | 93  | 2 | VFDKDGNGFISAAELR       | 122d | 18 |
| FBgn0000253 | 923.61  | 104 | 3 | EAFSLFDKDGDTITTK       | 132d | 18 |
| FBgn0000253 | 675.68  | 63  | 2 | LTDEEVDEMIR            | 132d | 18 |
| FBgn0000253 | 870.49  | 80  | 3 | VFDKDGNGFISAAELR       | 132d | 18 |
| FBgn0000253 | 1240.64 | 44  | 1 | EADIDGDGQVNYEEFVTMMTSK | 142d | 18 |
| FBgn0000253 | 479.02  | 43  | 2 | EAFSLFDK               | 142d | 18 |

|             |         |     |   |                        |      |    |
|-------------|---------|-----|---|------------------------|------|----|
| FBgn0000253 | 923.56  | 85  | 3 | EAFSLFDKDGDTITTK       | 142d | 18 |
| FBgn0000253 | 675.69  | 61  | 1 | LTDEEVDEMIR            | 142d | 18 |
| FBgn0000253 | 870.45  | 100 | 3 | VFDKDGNGFISAAELR       | 142d | 18 |
| FBgn0000253 | 625.79  | 43  | 1 | DGNGFISAAELR           | 2d   | 28 |
| FBgn0000253 | 923.46  | 97  | 5 | EAFSLFDKDGDTITTK       | 2d   | 28 |
| FBgn0000253 | 675.71  | 78  | 4 | LTDEEVDEMIR            | 2d   | 28 |
| FBgn0000253 | 870.27  | 96  | 3 | VFDKDGNGFISAAELR       | 2d   | 28 |
| FBgn0000253 | 1240.63 | 82  | 1 | EADIDGDGQVNYEEFVTMMTSK | 12d  | 28 |
| FBgn0000253 | 923.44  | 75  | 3 | EAFSLFDKDGDTITTK       | 12d  | 28 |
| FBgn0000253 | 675.9   | 81  | 5 | LTDEEVDEMIR            | 12d  | 28 |
| FBgn0000253 | 870.51  | 92  | 3 | VFDKDGNGFISAAELR       | 12d  | 28 |
| FBgn0000253 | 676     | 78  | 5 | LTDEEVDEMIR            | 22d  | 28 |
| FBgn0000253 | 870.69  | 99  | 3 | VFDKDGNGFISAAELR       | 22d  | 28 |
| FBgn0000253 | 923.38  | 80  | 3 | EAFSLFDKDGDTITTK       | 32d  | 28 |
| FBgn0000253 | 515.09  | 35  | 1 | HVMTNLGEK              | 32d  | 28 |
| FBgn0000253 | 675.68  | 85  | 4 | LTDEEVDEMIR            | 32d  | 28 |
| FBgn0000253 | 870.68  | 105 | 3 | VFDKDGNGFISAAELR       | 32d  | 28 |
| FBgn0000253 | 923.66  | 71  | 2 | EAFSLFDKDGDTITTK       | 36d  | 28 |
| FBgn0000253 | 675.95  | 73  | 3 | LTDEEVDEMIR            | 36d  | 28 |
| FBgn0000253 | 870.43  | 96  | 3 | VFDKDGNGFISAAELR       | 36d  | 28 |
| FBgn0000253 | 923.22  | 90  | 2 | EAFSLFDKDGDTITTK       | 42d  | 28 |
| FBgn0000253 | 515.1   | 44  | 3 | HVMTNLGEK              | 42d  | 28 |
| FBgn0000253 | 675.66  | 67  | 5 | LTDEEVDEMIR            | 42d  | 28 |
| FBgn0000253 | 870.64  | 86  | 3 | VFDKDGNGFISAAELR       | 42d  | 28 |
| FBgn0000253 | 923.5   | 87  | 3 | EAFSLFDKDGDTITTK       | 46d  | 28 |
| FBgn0000253 | 870.57  | 100 | 2 | VFDKDGNGFISAAELR       | 46d  | 28 |
| FBgn0000253 | 923.39  | 104 | 3 | EAFSLFDKDGDTITTK       | 50d  | 28 |
| FBgn0000253 | 515.38  | 38  | 1 | HVMTNLGEK              | 50d  | 28 |
| FBgn0000253 | 676.03  | 73  | 4 | LTDEEVDEMIR            | 50d  | 28 |
| FBgn0000253 | 870.32  | 88  | 1 | VFDKDGNGFISAAELR       | 50d  | 28 |
| FBgn0000253 | 923.59  | 88  | 3 | EAFSLFDKDGDTITTK       | 52d  | 28 |
| FBgn0000253 | 676.04  | 86  | 6 | LTDEEVDEMIR            | 52d  | 28 |

|             |         |     |   |                            |      |    |
|-------------|---------|-----|---|----------------------------|------|----|
| FBgn0000253 | 870.32  | 89  | 3 | VFDKDGNGFISAAELR           | 52d  | 28 |
| FBgn0000253 | 923.47  | 89  | 2 | EAFSLFDKDGDTITTK           | 56d  | 28 |
| FBgn0000253 | 675.91  | 86  | 4 | LTDEEVDEMIR                | 56d  | 28 |
| FBgn0000253 | 870.49  | 100 | 2 | VFDKDGNGFISAAELR           | 56d  | 28 |
| FBgn0000258 | 1154.44 | 45  | 2 | LIDWGLAEFYHPGQEYNVR        | 2d   | 18 |
| FBgn0000258 | 873.85  | 68  | 1 | TPALIFEHVNNTDFK            | 62d  | 18 |
| FBgn0000261 | 465.99  | 62  | 1 | DASQTVGPR                  | 2d   | 18 |
| FBgn0000261 | 1124.02 | 85  | 2 | GPILLQDVNFLDEMSEFDR        | 2d   | 18 |
| FBgn0000261 | 1063.56 | 112 | 2 | LVQNIAGHLSNASQFLQER        | 2d   | 18 |
| FBgn0000261 | 1421.66 | 42  | 1 | NYFAEVEQIAFSPAHLVPGVEPSPDK | 2d   | 18 |
| FBgn0000261 | 827.34  | 65  | 2 | TADQLASTDPDYSIR            | 2d   | 18 |
| FBgn0000261 | 827.4   | 40  | 1 | TADQLASTDPDYSIR            | 22d  | 18 |
| FBgn0000261 | 749.86  | 85  | 2 | GPILLQDVNFLDEMSEFDR        | 42d  | 18 |
| FBgn0000261 | 948.28  | 35  | 1 | NYFAEVEQIAFSPAHLVPGVEPSPDK | 42d  | 18 |
| FBgn0000261 | 948.17  | 49  | 1 | NYFAEVEQIAFSPAHLVPGVEPSPDK | 62d  | 18 |
| FBgn0000261 | 749.83  | 37  | 1 | GPILLQDVNFLDEMSEFDR        | 82d  | 18 |
| FBgn0000261 | 709.37  | 40  | 1 | LVQNIAGHLSNASQFLQER        | 102d | 18 |
| FBgn0000261 | 1421.74 | 41  | 1 | NYFAEVEQIAFSPAHLVPGVEPSPDK | 102d | 18 |
| FBgn0000261 | 1063.55 | 36  | 1 | LVQNIAGHLSNASQFLQER        | 112d | 18 |
| FBgn0000261 | 1124.24 | 88  | 1 | GPILLQDVNFLDEMSEFDR        | 122d | 18 |
| FBgn0000261 | 887.52  | 39  | 1 | YSSGDTEDNFGQVTFWVHVLDK     | 132d | 18 |
| FBgn0000261 | 887.47  | 62  | 1 | YSSGDTEDNFGQVTFWVHVLDK     | 142d | 18 |
| FBgn0000261 | 619.62  | 48  | 1 | DAASNQLIDYK                | 2d   | 28 |
| FBgn0000261 | 721.69  | 87  | 1 | FSTVGGESGSADTAR            | 2d   | 28 |
| FBgn0000261 | 749.63  | 49  | 1 | GPILLQDVNFLDEMSEFDR        | 2d   | 28 |
| FBgn0000261 | 1063.63 | 66  | 2 | LVQNIAGHLSNASQFLQER        | 2d   | 28 |
| FBgn0000261 | 992.49  | 91  | 3 | NSQTVSPGAITGNGAPIGIK       | 2d   | 28 |
| FBgn0000261 | 827.33  | 73  | 3 | TADQLASTDPDYSIR            | 2d   | 28 |
| FBgn0000261 | 749.81  | 59  | 1 | GPILLQDVNFLDEMSEFDR        | 12d  | 28 |
| FBgn0000261 | 1063.32 | 85  | 3 | LVQNIAGHLSNASQFLQER        | 12d  | 28 |
| FBgn0000261 | 1421.69 | 81  | 3 | NYFAEVEQIAFSPAHLVPGVEPSPDK | 12d  | 28 |
| FBgn0000261 | 827.2   | 54  | 2 | TADQLASTDPDYSIR            | 12d  | 28 |

|             |         |     |   |                             |      |    |
|-------------|---------|-----|---|-----------------------------|------|----|
| FBgn0000261 | 827.16  | 37  | 1 | TADQLASTDPDYSIR             | 22d  | 28 |
| FBgn0000261 | 827.17  | 85  | 2 | TADQLASTDPDYSIR             | 32d  | 28 |
| FBgn0000261 | 709.5   | 53  | 1 | LVQNIAGHLSNASQFLQER         | 36d  | 28 |
| FBgn0000261 | 992.5   | 77  | 1 | NSQTVSPGAIITGNGAPIGIK       | 36d  | 28 |
| FBgn0000261 | 827.23  | 73  | 2 | TADQLASTDPDYSIR             | 36d  | 28 |
| FBgn0000261 | 827.41  | 53  | 3 | TADQLASTDPDYSIR             | 46d  | 28 |
| FBgn0000261 | 827.38  | 64  | 3 | TADQLASTDPDYSIR             | 50d  | 28 |
| FBgn0000261 | 749.54  | 47  | 1 | GPILLQDVNFLDEMSEHFDK        | 52d  | 28 |
| FBgn0000261 | 1421.71 | 60  | 2 | NYFAEVEQIAFSPAHLVPGVEPSPDK  | 52d  | 28 |
| FBgn0000261 | 827.62  | 49  | 2 | TADQLASTDPDYSIR             | 52d  | 28 |
| FBgn0000261 | 1124.1  | 84  | 2 | GPILLQDVNFLDEMSEHFDK        | 56d  | 28 |
| FBgn0000273 | 923.96  | 51  | 1 | DLKPENLLIDSQGYLK            | 52d  | 28 |
| FBgn0000273 | 923.81  | 39  | 1 | DLKPENLLIDSQGYLK            | 56d  | 28 |
| FBgn0000303 | 790.19  | 66  | 2 | NILGNGIDIPLLGLR             | 22d  | 28 |
| FBgn0000303 | 846.17  | 45  | 2 | VPVPALDETMADYIR             | 56d  | 28 |
| FBgn0000307 | 394.96  | 36  | 1 | NAGGLGGSR                   | 32d  | 28 |
| FBgn0000308 | 1139.8  | 112 | 1 | LISGFDQQDGLTSNGVTLAQQR      | 2d   | 18 |
| FBgn0000308 | 1351.06 | 53  | 2 | TTQAVIVSIYEDPVQPQAASVVEK    | 2d   | 18 |
| FBgn0000308 | 544.75  | 36  | 2 | YIYLSGTDR                   | 2d   | 18 |
| FBgn0000308 | 1139.82 | 55  | 1 | LISGFDQQDGLTSNGVTLAQQR      | 102d | 18 |
| FBgn0000308 | 1139.69 | 62  | 2 | LISGFDQQDGLTSNGVTLAQQR      | 142d | 18 |
| FBgn0000308 | 1139.67 | 90  | 2 | LISGFDQQDGLTSNGVTLAQQR      | 2d   | 28 |
| FBgn0000308 | 1139.2  | 35  | 1 | LISGFDQQDGLTSNGVTLAQQR      | 12d  | 28 |
| FBgn0000308 | 544.4   | 39  | 2 | YIYLSGTDR                   | 46d  | 28 |
| FBgn0000308 | 1351.14 | 37  | 1 | TTQAVIVSIYEDPVQPQAASVVEK    | 50d  | 28 |
| FBgn0000308 | 1124.73 | 60  | 1 | ACIAGHDGNIWAQSSGFEVTK       | 52d  | 28 |
| FBgn0000308 | 1351.25 | 46  | 1 | TTQAVIVSIYEDPVQPQAASVVEK    | 52d  | 28 |
| FBgn0000308 | 1139.59 | 38  | 1 | LISGFDQQDGLTSNGVTLAQQR      | 56d  | 28 |
| FBgn0000313 | 1043.45 | 71  | 3 | ISGNHLTEIPDDAFTGLER         | 2d   | 18 |
| FBgn0000313 | 991.71  | 43  | 1 | LDFSENGISSIENDAFHEIGHSLISLK | 2d   | 18 |
| FBgn0000313 | 1100.14 | 59  | 1 | LLLTDNILSEIPYDALGPLK        | 2d   | 18 |
| FBgn0000313 | 837.41  | 76  | 3 | MSHGYSGSALPAEPLR            | 2d   | 18 |



|             |         |    |   |                        |      |    |
|-------------|---------|----|---|------------------------|------|----|
| FBgn0000313 | 709.74  | 65 | 3 | TFFDGNPIHTLR           | 2d   | 18 |
| FBgn0000313 | 695.99  | 42 | 1 | ISGNHLTEIPDDAFTGLER    | 22d  | 18 |
| FBgn0000313 | 1100.16 | 65 | 1 | LLLTDNILSEIPYDALGPLK   | 22d  | 18 |
| FBgn0000313 | 1043.4  | 64 | 1 | ISGNHLTEIPDDAFTGLER    | 42d  | 18 |
| FBgn0000313 | 569.84  | 60 | 1 | LFNNFDVLR              | 42d  | 18 |
| FBgn0000313 | 1100.19 | 48 | 3 | LLLTDNILSEIPYDALGPLK   | 42d  | 18 |
| FBgn0000313 | 1100.11 | 57 | 1 | LLLTDNILSEIPYDALGPLK   | 62d  | 18 |
| FBgn0000313 | 710.09  | 72 | 1 | TFFDGNPIHTLR           | 82d  | 18 |
| FBgn0000313 | 1043.6  | 56 | 1 | ISGNHLTEIPDDAFTGLER    | 102d | 18 |
| FBgn0000313 | 1043.66 | 57 | 1 | ISGNHLTEIPDDAFTGLER    | 142d | 18 |
| FBgn0000313 | 569.83  | 36 | 1 | LAVLDLSHNR             | 2d   | 28 |
| FBgn0000313 | 733.92  | 39 | 1 | LLLTDNILSEIPYDALGPLK   | 2d   | 28 |
| FBgn0000313 | 837.15  | 57 | 1 | MSHGYSGSALPAEPLR       | 2d   | 28 |
| FBgn0000313 | 709.63  | 58 | 2 | TFFDGNPIHTLR           | 2d   | 28 |
| FBgn0000313 | 696.13  | 69 | 3 | ISGNHLTEIPDDAFTGLER    | 12d  | 28 |
| FBgn0000313 | 1100.11 | 46 | 2 | LLLTDNILSEIPYDALGPLK   | 12d  | 28 |
| FBgn0000313 | 837.2   | 68 | 2 | MSHGYSGSALPAEPLR       | 12d  | 28 |
| FBgn0000313 | 696.13  | 35 | 1 | ISGNHLTEIPDDAFTGLER    | 22d  | 28 |
| FBgn0000313 | 696.06  | 54 | 2 | ISGNHLTEIPDDAFTGLER    | 32d  | 28 |
| FBgn0000313 | 1100.16 | 41 | 1 | LLLTDNILSEIPYDALGPLK   | 32d  | 28 |
| FBgn0000313 | 696.1   | 52 | 2 | ISGNHLTEIPDDAFTGLER    | 36d  | 28 |
| FBgn0000313 | 1100.32 | 56 | 1 | LLLTDNILSEIPYDALGPLK   | 36d  | 28 |
| FBgn0000313 | 733.67  | 37 | 1 | LLLTDNILSEIPYDALGPLK   | 42d  | 28 |
| FBgn0000313 | 1043.47 | 53 | 2 | ISGNHLTEIPDDAFTGLER    | 46d  | 28 |
| FBgn0000313 | 1100.06 | 38 | 1 | LLLTDNILSEIPYDALGPLK   | 46d  | 28 |
| FBgn0000313 | 1099.74 | 43 | 2 | LLLTDNILSEIPYDALGPLK   | 50d  | 28 |
| FBgn0000313 | 837.42  | 50 | 1 | MSHGYSGSALPAEPLR       | 50d  | 28 |
| FBgn0000313 | 1100.28 | 39 | 1 | LLLTDNILSEIPYDALGPLK   | 52d  | 28 |
| FBgn0000313 | 1100.08 | 53 | 1 | LLLTDNILSEIPYDALGPLK   | 56d  | 28 |
| FBgn0000319 | 974.52  | 63 | 1 | AFMTADLPNELIELLEK      | 2d   | 18 |
| FBgn0000319 | 741.39  | 52 | 2 | ALEHYTDLYDIK           | 2d   | 18 |
| FBgn0000319 | 1163.65 | 69 | 1 | ISADTIFVTAPHEASGGIIVNR | 2d   | 18 |

|             |         |    |   |                       |      |    |
|-------------|---------|----|---|-----------------------|------|----|
| FBgn0000319 | 1209.15 | 81 | 3 | KFDVNTSAIQVLIDQVNNLER | 2d   | 18 |
| FBgn0000319 | 635.99  | 44 | 1 | LFTAGQYAEAAK          | 2d   | 18 |
| FBgn0000319 | 564.22  | 38 | 1 | LLLPWLESR             | 22d  | 18 |
| FBgn0000319 | 826.26  | 68 | 2 | ADDPsAYVDVVDVASK      | 42d  | 18 |
| FBgn0000319 | 974.56  | 34 | 1 | AFMTADLPNELIELLEK     | 42d  | 18 |
| FBgn0000319 | 660.36  | 36 | 1 | NNLAGAEDLFVR          | 42d  | 18 |
| FBgn0000319 | 741.35  | 63 | 1 | ALEHYTDLYDIK          | 62d  | 18 |
| FBgn0000319 | 1145.05 | 44 | 1 | FDVNTSAIQVLIDQVNNLER  | 62d  | 18 |
| FBgn0000319 | 1208.98 | 53 | 1 | KFDVNTSAIQVLIDQVNNLER | 62d  | 18 |
| FBgn0000319 | 974.56  | 38 | 1 | AFMTADLPNELIELLEK     | 82d  | 18 |
| FBgn0000319 | 1124.11 | 35 | 1 | AINEALNGLLIDEEDYQGLR  | 82d  | 18 |
| FBgn0000319 | 883.87  | 74 | 1 | GQFSTDELVEEVEKR       | 82d  | 18 |
| FBgn0000319 | 974.61  | 48 | 1 | AFMTADLPNELIELLEK     | 102d | 18 |
| FBgn0000319 | 974.23  | 42 | 2 | AFMTADLPNELIELLEK     | 112d | 18 |
| FBgn0000319 | 660.13  | 69 | 1 | NNLAGAEDLFVR          | 142d | 18 |
| FBgn0000319 | 741.4   | 56 | 3 | ALEHYTDLYDIK          | 2d   | 28 |
| FBgn0000319 | 999.7   | 70 | 2 | LADLEEFISGPNHADIQK    | 2d   | 28 |
| FBgn0000319 | 974.71  | 67 | 1 | AFMTADLPNELIELLEK     | 12d  | 28 |
| FBgn0000319 | 741.27  | 57 | 1 | ALEHYTDLYDIK          | 12d  | 28 |
| FBgn0000319 | 974.62  | 53 | 1 | AFMTADLPNELIELLEK     | 36d  | 28 |
| FBgn0000319 | 1209.09 | 69 | 1 | KFDVNTSAIQVLIDQVNNLER | 42d  | 28 |
| FBgn0000319 | 974.59  | 40 | 1 | AFMTADLPNELIELLEK     | 50d  | 28 |
| FBgn0000319 | 763.73  | 34 | 1 | FDVNTSAIQVLIDQVNNLER  | 50d  | 28 |
| FBgn0000346 | 716.51  | 48 | 2 | AIVNVGDFPEEIK         | 2d   | 18 |
| FBgn0000346 | 921.16  | 53 | 2 | APESGLVSVLVAGAPNSGK   | 2d   | 18 |
| FBgn0000346 | 999.06  | 82 | 2 | GSVAGNSGVHDTVVNQLLTK  | 2d   | 18 |
| FBgn0000346 | 800.39  | 50 | 1 | TVSQEPYDSQMAK         | 2d   | 18 |
| FBgn0000346 | 716.35  | 61 | 2 | AIVNVGDFPEEIK         | 22d  | 18 |
| FBgn0000346 | 998.88  | 76 | 1 | GSVAGNSGVHDTVVNQLLTK  | 22d  | 18 |
| FBgn0000346 | 546.34  | 47 | 1 | LLDYGSIGPR            | 42d  | 18 |
| FBgn0000346 | 646.99  | 67 | 3 | NFSGAELEGLVR          | 42d  | 18 |
| FBgn0000346 | 711     | 61 | 2 | QSIINPDWDFGK          | 42d  | 18 |

|             |        |     |   |                      |      |    |
|-------------|--------|-----|---|----------------------|------|----|
| FBgn0000346 | 716.46 | 61  | 2 | AIVNVGDFPEEIK        | 62d  | 18 |
| FBgn0000346 | 921.24 | 60  | 1 | APESSGLVSVLVAGAPNSGK | 62d  | 18 |
| FBgn0000346 | 999.05 | 72  | 1 | GSVAGNSGVHDTVVNQLLTK | 62d  | 18 |
| FBgn0000346 | 716.19 | 53  | 1 | AIVNVGDFPEEIK        | 82d  | 18 |
| FBgn0000346 | 716.4  | 59  | 1 | AIVNVGDFPEEIK        | 102d | 18 |
| FBgn0000346 | 998.97 | 57  | 2 | GSVAGNSGVHDTVVNQLLTK | 102d | 18 |
| FBgn0000346 | 716.6  | 54  | 1 | AIVNVGDFPEEIK        | 112d | 18 |
| FBgn0000346 | 999.11 | 82  | 1 | GSVAGNSGVHDTVVNQLLTK | 112d | 18 |
| FBgn0000346 | 716.39 | 48  | 1 | AIVNVGDFPEEIK        | 122d | 18 |
| FBgn0000346 | 999.18 | 75  | 2 | GSVAGNSGVHDTVVNQLLTK | 122d | 18 |
| FBgn0000346 | 486.41 | 35  | 1 | MSDFPFVK             | 122d | 18 |
| FBgn0000346 | 646.71 | 59  | 1 | NFSGAELEGLVR         | 122d | 18 |
| FBgn0000346 | 711.06 | 45  | 1 | QSIINPDWDFGK         | 122d | 18 |
| FBgn0000346 | 921.17 | 56  | 1 | APESSGLVSVLVAGAPNSGK | 132d | 18 |
| FBgn0000346 | 999.11 | 89  | 2 | GSVAGNSGVHDTVVNQLLTK | 132d | 18 |
| FBgn0000346 | 716.33 | 59  | 2 | AIVNVGDFPEEIK        | 142d | 18 |
| FBgn0000346 | 646.93 | 59  | 1 | NFSGAELEGLVR         | 142d | 18 |
| FBgn0000346 | 716.44 | 52  | 3 | AIVNVGDFPEEIK        | 2d   | 28 |
| FBgn0000346 | 921.16 | 96  | 1 | APESSGLVSVLVAGAPNSGK | 2d   | 28 |
| FBgn0000346 | 800.05 | 59  | 1 | TVSQEPYDSDQMAK       | 2d   | 28 |
| FBgn0000346 | 716.43 | 49  | 2 | AIVNVGDFPEEIK        | 12d  | 28 |
| FBgn0000346 | 920.57 | 130 | 3 | APESSGLVSVLVAGAPNSGK | 12d  | 28 |
| FBgn0000346 | 693.94 | 34  | 1 | DMIDEALLRPGR         | 12d  | 28 |
| FBgn0000346 | 998.82 | 92  | 3 | GSVAGNSGVHDTVVNQLLTK | 12d  | 28 |
| FBgn0000346 | 800.33 | 47  | 1 | TVSQEPYDSDQMAK       | 12d  | 28 |
| FBgn0000346 | 716.26 | 36  | 1 | AIVNVGDFPEEIK        | 22d  | 28 |
| FBgn0000346 | 842.53 | 37  | 1 | MGIGGLDKEFNSIFR      | 22d  | 28 |
| FBgn0000346 | 646.74 | 60  | 2 | NFSGAELEGLVR         | 22d  | 28 |
| FBgn0000346 | 646.61 | 64  | 2 | NFSGAELEGLVR         | 32d  | 28 |
| FBgn0000346 | 716.31 | 60  | 2 | AIVNVGDFPEEIK        | 36d  | 28 |
| FBgn0000346 | 920.95 | 35  | 1 | APESSGLVSVLVAGAPNSGK | 36d  | 28 |
| FBgn0000346 | 647.07 | 65  | 1 | NFSGAELEGLVR         | 36d  | 28 |

|             |         |     |   |                      |     |    |
|-------------|---------|-----|---|----------------------|-----|----|
| FBgn0000346 | 716.41  | 45  | 1 | AIVNVGDFPEEIK        | 42d | 28 |
| FBgn0000346 | 843.17  | 54  | 1 | MGIGGLDKEFNSIFR      | 42d | 28 |
| FBgn0000346 | 646.61  | 75  | 3 | NFSGAELEGLVR         | 42d | 28 |
| FBgn0000346 | 710.84  | 37  | 1 | QSIINPDWDFGK         | 42d | 28 |
| FBgn0000346 | 799.97  | 49  | 2 | TVSQEPYDSDQMAK       | 42d | 28 |
| FBgn0000346 | 716.59  | 52  | 2 | AIVNVGDFPEEIK        | 46d | 28 |
| FBgn0000346 | 646.82  | 60  | 1 | NFSGAELEGLVR         | 46d | 28 |
| FBgn0000346 | 716.47  | 52  | 2 | AIVNVGDFPEEIK        | 50d | 28 |
| FBgn0000346 | 999.14  | 94  | 3 | GSVAGNSGVHDTVVNQLLTK | 50d | 28 |
| FBgn0000346 | 676.51  | 89  | 1 | LFAEAEIEEEKR         | 50d | 28 |
| FBgn0000346 | 710.77  | 51  | 2 | QSIINPDWDFGK         | 50d | 28 |
| FBgn0000346 | 800.3   | 38  | 1 | TVSQEPYDSDQMAK       | 50d | 28 |
| FBgn0000346 | 716.3   | 50  | 1 | AIVNVGDFPEEIK        | 52d | 28 |
| FBgn0000346 | 999.2   | 79  | 3 | GSVAGNSGVHDTVVNQLLTK | 52d | 28 |
| FBgn0000346 | 647.06  | 59  | 3 | NFSGAELEGLVR         | 52d | 28 |
| FBgn0000346 | 710.44  | 41  | 1 | QSIINPDWDFGK         | 52d | 28 |
| FBgn0000346 | 800.5   | 57  | 2 | TVSQEPYDSDQMAK       | 52d | 28 |
| FBgn0000346 | 921.07  | 51  | 2 | APESSGLVSVLVAGAPNSGK | 56d | 28 |
| FBgn0000346 | 646.76  | 70  | 1 | NFSGAELEGLVR         | 56d | 28 |
| FBgn0000409 | 1035.49 | 53  | 1 | GITWNEDTLFEYLENPK    | 2d  | 18 |
| FBgn0000409 | 1099.62 | 100 | 1 | GITWNEDTLFEYLENPKK   | 2d  | 18 |
| FBgn0000409 | 772.34  | 87  | 1 | KTGQAAGFAYTDANK      | 2d  | 18 |
| FBgn0000409 | 708.39  | 65  | 1 | TGQAAGFAYTDANK       | 2d  | 18 |
| FBgn0000409 | 567.26  | 70  | 3 | VGPNLHGLIGR          | 2d  | 18 |
| FBgn0000409 | 772.35  | 46  | 1 | KTGQAAGFAYTDANK      | 22d | 18 |
| FBgn0000409 | 567.34  | 59  | 3 | VGPNLHGLIGR          | 22d | 18 |
| FBgn0000409 | 567.38  | 49  | 1 | VGPNLHGLIGR          | 42d | 18 |
| FBgn0000409 | 1099.1  | 85  | 2 | GITWNEDTLFEYLENPKK   | 62d | 18 |
| FBgn0000409 | 567.22  | 72  | 2 | VGPNLHGLIGR          | 62d | 18 |
| FBgn0000409 | 1035.45 | 89  | 3 | GITWNEDTLFEYLENPK    | 82d | 18 |
| FBgn0000409 | 1098.69 | 72  | 2 | GITWNEDTLFEYLENPKK   | 82d | 18 |
| FBgn0000409 | 567.18  | 68  | 3 | VGPNLHGLIGR          | 82d | 18 |

|             |         |     |   |                                    |      |    |
|-------------|---------|-----|---|------------------------------------|------|----|
| FBgn0000409 | 1035.32 | 94  | 3 | GITWNEDTLFEYLENPK                  | 102d | 18 |
| FBgn0000409 | 1035.61 | 63  | 1 | GITWNEDTLFEYLENPK                  | 112d | 18 |
| FBgn0000409 | 1099.6  | 75  | 2 | GITWNEDTLFEYLENPKK                 | 112d | 18 |
| FBgn0000409 | 1035.59 | 68  | 2 | GITWNEDTLFEYLENPK                  | 122d | 18 |
| FBgn0000409 | 1035.49 | 65  | 2 | GITWNEDTLFEYLENPK                  | 132d | 18 |
| FBgn0000409 | 1099.61 | 71  | 3 | GITWNEDTLFEYLENPKK                 | 132d | 18 |
| FBgn0000409 | 567.12  | 47  | 1 | VGPNLHGLIGR                        | 132d | 18 |
| FBgn0000409 | 1035.68 | 95  | 3 | GITWNEDTLFEYLENPK                  | 142d | 18 |
| FBgn0000409 | 1099.65 | 85  | 2 | GITWNEDTLFEYLENPKK                 | 142d | 18 |
| FBgn0000409 | 708.38  | 52  | 1 | TGQAAGFAYTDANK                     | 142d | 18 |
| FBgn0000409 | 1035.52 | 96  | 2 | GITWNEDTLFEYLENPK                  | 2d   | 28 |
| FBgn0000409 | 733.25  | 84  | 2 | GITWNEDTLFEYLENPKK                 | 2d   | 28 |
| FBgn0000409 | 772.18  | 65  | 1 | KTGQAAGFAYTDANK                    | 2d   | 28 |
| FBgn0000409 | 708.55  | 40  | 1 | TGQAAGFAYTDANK                     | 2d   | 28 |
| FBgn0000409 | 567.36  | 65  | 2 | VGPNLHGLIGR                        | 2d   | 28 |
| FBgn0000409 | 1099.79 | 103 | 2 | GITWNEDTLFEYLENPKK                 | 12d  | 28 |
| FBgn0000409 | 567.41  | 50  | 3 | VGPNLHGLIGR                        | 22d  | 28 |
| FBgn0000409 | 567.27  | 68  | 3 | VGPNLHGLIGR                        | 32d  | 28 |
| FBgn0000409 | 1099.77 | 55  | 2 | GITWNEDTLFEYLENPKK                 | 36d  | 28 |
| FBgn0000409 | 567.21  | 66  | 3 | VGPNLHGLIGR                        | 36d  | 28 |
| FBgn0000409 | 1099.54 | 55  | 1 | GITWNEDTLFEYLENPKK                 | 42d  | 28 |
| FBgn0000409 | 567.45  | 52  | 2 | VGPNLHGLIGR                        | 42d  | 28 |
| FBgn0000409 | 772.32  | 77  | 2 | KTGQAAGFAYTDANK                    | 46d  | 28 |
| FBgn0000409 | 378.67  | 55  | 3 | VGPNLHGLIGR                        | 46d  | 28 |
| FBgn0000409 | 772.5   | 50  | 2 | KTGQAAGFAYTDANK                    | 50d  | 28 |
| FBgn0000409 | 567.24  | 65  | 3 | VGPNLHGLIGR                        | 50d  | 28 |
| FBgn0000409 | 1099.69 | 60  | 2 | GITWNEDTLFEYLENPKK                 | 52d  | 28 |
| FBgn0000409 | 567.4   | 42  | 2 | VGPNLHGLIGR                        | 52d  | 28 |
| FBgn0000409 | 1035.42 | 78  | 6 | GITWNEDTLFEYLENPK                  | 56d  | 28 |
| FBgn0000409 | 1099.43 | 75  | 2 | GITWNEDTLFEYLENPKK                 | 56d  | 28 |
| FBgn0000412 | 1159.58 | 47  | 1 | IQNDEDPEDEGEEDGDGDGSGAELANNSSPSPTK | 12d  | 28 |
| FBgn0000427 | 415.49  | 35  | 1 | RGLESRVVSSR                        | 32d  | 28 |

|             |         |    |   |                                  |      |    |
|-------------|---------|----|---|----------------------------------|------|----|
| FBgn0000454 | 1296.22 | 58 | 2 | VPNVDPQVVYAPVSELTDYDDVR          | 2d   | 18 |
| FBgn0000454 | 1296.38 | 48 | 1 | VPNVDPQVVYAPVSELTDYDDVR          | 112d | 18 |
| FBgn0000481 | 1015.51 | 36 | 1 | DALTIKPKVEPHDVPELK               | 56d  | 28 |
| FBgn0000487 | 1015.65 | 76 | 2 | NLLLLFDHPTEPVFMDK                | 2d   | 18 |
| FBgn0000487 | 1015.51 | 88 | 2 | NLLLLFDHPTEPVFMDK                | 42d  | 18 |
| FBgn0000487 | 710.07  | 61 | 1 | DYTASDLDPPEHR                    | 2d   | 28 |
| FBgn0000524 | 388.72  | 34 | 1 | IAFDRR                           | 36d  | 28 |
| FBgn0000524 | 389.17  | 34 | 1 | IAFDRR                           | 56d  | 28 |
| FBgn0000536 | 1136.53 | 38 | 1 | EAIVPFVPIFVEEADVIQGAK            | 42d  | 18 |
| FBgn0000556 | 685.23  | 79 | 2 | MDSSEPPYSEAR                     | 2d   | 18 |
| FBgn0000556 | 640.87  | 72 | 2 | TLIDALDAILPPARPTDK               | 2d   | 18 |
| FBgn0000556 | 1235.55 | 59 | 3 | VETGVLKPGTVVVFAPANITTEVK         | 2d   | 18 |
| FBgn0000556 | 641.05  | 67 | 2 | TLIDALDAILPPARPTDK               | 22d  | 18 |
| FBgn0000556 | 1235.79 | 53 | 1 | VETGVLKPGTVVVFAPANITTEVK         | 22d  | 18 |
| FBgn0000556 | 488.71  | 51 | 3 | LPLQDVYK                         | 42d  | 18 |
| FBgn0000556 | 961.27  | 63 | 4 | TLIDALDAILPPARPTDK               | 42d  | 18 |
| FBgn0000556 | 1235.63 | 51 | 3 | VETGVLKPGTVVVFAPANITTEVK         | 42d  | 18 |
| FBgn0000556 | 640.36  | 77 | 2 | TLIDALDAILPPARPTDK               | 62d  | 18 |
| FBgn0000556 | 1235.78 | 61 | 2 | VETGVLKPGTVVVFAPANITTEVK         | 62d  | 18 |
| FBgn0000556 | 685.4   | 52 | 2 | MDSSEPPYSEAR                     | 82d  | 18 |
| FBgn0000556 | 640.68  | 62 | 2 | TLIDALDAILPPARPTDK               | 82d  | 18 |
| FBgn0000556 | 1235.81 | 57 | 2 | VETGVLKPGTVVVFAPANITTEVK         | 82d  | 18 |
| FBgn0000556 | 961.03  | 39 | 1 | TLIDALDAILPPARPTDK               | 102d | 18 |
| FBgn0000556 | 1235.65 | 59 | 2 | VETGVLKPGTVVVFAPANITTEVK         | 102d | 18 |
| FBgn0000556 | 1183.33 | 48 | 2 | IGYNPAAVAFVPISGWHGDNMLEPSTNMPWFK | 112d | 18 |
| FBgn0000556 | 1235.92 | 48 | 3 | VETGVLKPGTVVVFAPANITTEVK         | 112d | 18 |
| FBgn0000556 | 641.1   | 70 | 3 | TLIDALDAILPPARPTDK               | 122d | 18 |
| FBgn0000556 | 1235.7  | 47 | 3 | VETGVLKPGTVVVFAPANITTEVK         | 122d | 18 |
| FBgn0000556 | 685.37  | 40 | 1 | MDSSEPPYSEAR                     | 132d | 18 |
| FBgn0000556 | 640.83  | 61 | 1 | TLIDALDAILPPARPTDK               | 132d | 18 |
| FBgn0000556 | 1235.54 | 38 | 1 | VETGVLKPGTVVVFAPANITTEVK         | 132d | 18 |
| FBgn0000556 | 469.17  | 56 | 1 | YYVTIIDAPGHR                     | 132d | 18 |

|             |         |    |   |                                  |      |    |
|-------------|---------|----|---|----------------------------------|------|----|
| FBgn0000556 | 1182.43 | 36 | 1 | IGYNPAAVAFVPISGWHGDNMLEPSTNMPWFK | 142d | 18 |
| FBgn0000556 | 641.02  | 67 | 4 | TLIDALDAILPPARPTDK               | 142d | 18 |
| FBgn0000556 | 1235.83 | 42 | 1 | VETGVLKPGTVVVFAPANITTEVK         | 142d | 18 |
| FBgn0000556 | 685.14  | 57 | 2 | MDSSEPPYSEAR                     | 2d   | 28 |
| FBgn0000556 | 960.77  | 42 | 2 | TLIDALDAILPPARPTDK               | 2d   | 28 |
| FBgn0000556 | 685.03  | 57 | 2 | MDSSEPPYSEAR                     | 12d  | 28 |
| FBgn0000556 | 640.89  | 71 | 3 | TLIDALDAILPPARPTDK               | 12d  | 28 |
| FBgn0000556 | 1235.62 | 62 | 3 | VETGVLKPGTVVVFAPANITTEVK         | 12d  | 28 |
| FBgn0000556 | 1235.94 | 57 | 1 | VETGVLKPGTVVVFAPANITTEVK         | 22d  | 28 |
| FBgn0000556 | 993.9   | 42 | 1 | YVPEGNLTSCGIDYLER                | 22d  | 28 |
| FBgn0000556 | 641.14  | 66 | 2 | TLIDALDAILPPARPTDK               | 32d  | 28 |
| FBgn0000556 | 1235.69 | 53 | 3 | VETGVLKPGTVVVFAPANITTEVK         | 32d  | 28 |
| FBgn0000556 | 513.8   | 64 | 1 | IGGIGTVPVGR                      | 36d  | 28 |
| FBgn0000556 | 1183.24 | 39 | 1 | IGYNPAAVAFVPISGWHGDNMLEPSTNMPWFK | 36d  | 28 |
| FBgn0000556 | 488.71  | 51 | 3 | LPLQDVYK                         | 36d  | 28 |
| FBgn0000556 | 641.16  | 58 | 1 | TLIDALDAILPPARPTDK               | 36d  | 28 |
| FBgn0000556 | 1235.59 | 47 | 3 | VETGVLKPGTVVVFAPANITTEVK         | 36d  | 28 |
| FBgn0000556 | 488.51  | 51 | 3 | LPLQDVYK                         | 42d  | 28 |
| FBgn0000556 | 960.91  | 48 | 1 | TLIDALDAILPPARPTDK               | 42d  | 28 |
| FBgn0000556 | 1235.64 | 54 | 3 | VETGVLKPGTVVVFAPANITTEVK         | 42d  | 28 |
| FBgn0000556 | 488.76  | 53 | 3 | LPLQDVYK                         | 46d  | 28 |
| FBgn0000556 | 961.2   | 52 | 1 | TLIDALDAILPPARPTDK               | 46d  | 28 |
| FBgn0000556 | 1235.66 | 54 | 3 | VETGVLKPGTVVVFAPANITTEVK         | 46d  | 28 |
| FBgn0000556 | 1183.23 | 44 | 1 | IGYNPAAVAFVPISGWHGDNMLEPSTNMPWFK | 50d  | 28 |
| FBgn0000556 | 960.59  | 38 | 1 | TLIDALDAILPPARPTDK               | 50d  | 28 |
| FBgn0000556 | 1235.92 | 56 | 2 | VETGVLKPGTVVVFAPANITTEVK         | 50d  | 28 |
| FBgn0000556 | 641.1   | 85 | 2 | TLIDALDAILPPARPTDK               | 52d  | 28 |
| FBgn0000556 | 1235.82 | 44 | 1 | VETGVLKPGTVVVFAPANITTEVK         | 52d  | 28 |
| FBgn0000556 | 469     | 58 | 2 | YYVTIIDAPGHR                     | 52d  | 28 |
| FBgn0000556 | 561.37  | 45 | 1 | STTTGHLYK                        | 56d  | 28 |
| FBgn0000556 | 640.87  | 71 | 3 | TLIDALDAILPPARPTDK               | 56d  | 28 |
| FBgn0000556 | 1235.53 | 61 | 3 | VETGVLKPGTVVVFAPANITTEVK         | 56d  | 28 |

|             |         |    |   |                             |      |    |
|-------------|---------|----|---|-----------------------------|------|----|
| FBgn0000556 | 703.31  | 61 | 3 | YYVTIIDAPGHR                | 56d  | 28 |
| FBgn0000557 | 1458.63 | 41 | 1 | IGYNPASVAFVPISGWHGDNMLEPSEK | 2d   | 18 |
| FBgn0000557 | 692.33  | 50 | 2 | MDSTEPPYSEAR                | 2d   | 18 |
| FBgn0000557 | 1278.32 | 35 | 1 | VETGLLKPGMVVNFAPVNLVTEVK    | 2d   | 18 |
| FBgn0000557 | 972.95  | 60 | 1 | IGYNPASVAFVPISGWHGDNMLEPSEK | 22d  | 18 |
| FBgn0000557 | 561.39  | 49 | 2 | STTTGHLYK                   | 22d  | 18 |
| FBgn0000557 | 703.6   | 65 | 3 | YYVTIIDAPGHR                | 22d  | 18 |
| FBgn0000557 | 560.98  | 43 | 2 | STTTGHLYK                   | 42d  | 18 |
| FBgn0000557 | 513.84  | 54 | 1 | IGGIGTVPVGR                 | 62d  | 18 |
| FBgn0000557 | 561.54  | 50 | 2 | STTTGHLYK                   | 62d  | 18 |
| FBgn0000557 | 703.31  | 61 | 1 | YYVTIIDAPGHR                | 62d  | 18 |
| FBgn0000557 | 703.49  | 61 | 3 | YYVTIIDAPGHR                | 82d  | 18 |
| FBgn0000557 | 972.93  | 41 | 1 | IGYNPASVAFVPISGWHGDNMLEPSEK | 112d | 18 |
| FBgn0000557 | 1278.37 | 41 | 2 | VETGLLKPGMVVNFAPVNLVTEVK    | 122d | 18 |
| FBgn0000557 | 489.03  | 48 | 1 | LPLQDVYK                    | 132d | 18 |
| FBgn0000557 | 561.41  | 36 | 1 | STTTGHLYK                   | 2d   | 28 |
| FBgn0000557 | 469.19  | 61 | 3 | YYVTIIDAPGHR                | 2d   | 28 |
| FBgn0000557 | 692.12  | 51 | 1 | MDSTEPPYSEAR                | 12d  | 28 |
| FBgn0000557 | 1278.15 | 66 | 2 | VETGLLKPGMVVNFAPVNLVTEVK    | 12d  | 28 |
| FBgn0000557 | 703.37  | 66 | 2 | YYVTIIDAPGHR                | 12d  | 28 |
| FBgn0000557 | 488.49  | 46 | 1 | LPLQDVYK                    | 22d  | 28 |
| FBgn0000557 | 972.96  | 48 | 1 | IGYNPASVAFVPISGWHGDNMLEPSEK | 32d  | 28 |
| FBgn0000557 | 1278.23 | 36 | 1 | VETGLLKPGMVVNFAPVNLVTEVK    | 32d  | 28 |
| FBgn0000557 | 469.18  | 61 | 3 | YYVTIIDAPGHR                | 32d  | 28 |
| FBgn0000557 | 561.31  | 43 | 1 | STTTGHLYK                   | 36d  | 28 |
| FBgn0000557 | 703.52  | 61 | 3 | YYVTIIDAPGHR                | 36d  | 28 |
| FBgn0000557 | 561.31  | 46 | 1 | STTTGHLYK                   | 42d  | 28 |
| FBgn0000557 | 703.55  | 65 | 3 | YYVTIIDAPGHR                | 42d  | 28 |
| FBgn0000557 | 561.29  | 44 | 3 | STTTGHLYK                   | 46d  | 28 |
| FBgn0000557 | 703.2   | 65 | 2 | YYVTIIDAPGHR                | 46d  | 28 |
| FBgn0000557 | 1458.93 | 51 | 1 | IGYNPASVAFVPISGWHGDNMLEPSEK | 52d  | 28 |
| FBgn0000557 | 1278.42 | 35 | 1 | VETGLLKPGMVVNFAPVNLVTEVK    | 52d  | 28 |



|             |         |    |   |                             |      |    |
|-------------|---------|----|---|-----------------------------|------|----|
| FBgn0000557 | 972.95  | 45 | 1 | IGYNPASVAFVPISGWHGDNMLEPSEK | 56d  | 28 |
| FBgn0000557 | 1277.99 | 57 | 1 | VETGLLKPGMVVNFAPVNLVTEVK    | 56d  | 28 |
| FBgn0000559 | 1028.05 | 52 | 1 | ALPMPDGLPEDIDNGDVSAK        | 2d   | 18 |
| FBgn0000559 | 671.25  | 59 | 3 | DLVFITHPDQR                 | 2d   | 18 |
| FBgn0000559 | 746.37  | 46 | 1 | EGLPDLSQYLDKL               | 2d   | 18 |
| FBgn0000559 | 1009.49 | 62 | 1 | GHVFEENQVVGTPMFVVK          | 2d   | 18 |
| FBgn0000559 | 613.48  | 55 | 3 | LWGENFFNAK                  | 2d   | 18 |
| FBgn0000559 | 1010.59 | 84 | 1 | MEMLYEGPHDDEAAIAVK          | 2d   | 18 |
| FBgn0000559 | 1342.85 | 75 | 4 | TWLPAGEALLQMIAIHLPSVVAQK    | 2d   | 18 |
| FBgn0000559 | 876.79  | 57 | 1 | YLSEKYDYDVTEAR              | 2d   | 18 |
| FBgn0000559 | 746.56  | 59 | 2 | EGLPDLSQYLDKL               | 22d  | 18 |
| FBgn0000559 | 1028.05 | 44 | 1 | ALPMPDGLPEDIDNGDVSAK        | 42d  | 18 |
| FBgn0000559 | 746.45  | 71 | 3 | EGLPDLSQYLDKL               | 42d  | 18 |
| FBgn0000559 | 671.36  | 51 | 1 | DLVFITHPDQR                 | 62d  | 18 |
| FBgn0000559 | 746.15  | 48 | 1 | EGLPDLSQYLDKL               | 62d  | 18 |
| FBgn0000559 | 547.5   | 47 | 1 | VNFTVDEIR                   | 62d  | 18 |
| FBgn0000559 | 547.32  | 59 | 1 | VNFTVDEIR                   | 82d  | 18 |
| FBgn0000559 | 1027.7  | 47 | 1 | ALPMPDGLPEDIDNGDVSAK        | 102d | 18 |
| FBgn0000559 | 746.22  | 50 | 1 | EGLPDLSQYLDKL               | 102d | 18 |
| FBgn0000559 | 746.2   | 63 | 1 | EGLPDLSQYLDKL               | 112d | 18 |
| FBgn0000559 | 746.22  | 67 | 1 | EGLPDLSQYLDKL               | 122d | 18 |
| FBgn0000559 | 746.56  | 42 | 1 | EGLPDLSQYLDKL               | 132d | 18 |
| FBgn0000559 | 746.47  | 55 | 1 | EGLPDLSQYLDKL               | 142d | 18 |
| FBgn0000559 | 614     | 38 | 1 | LWGENFFNAK                  | 142d | 18 |
| FBgn0000559 | 671.38  | 49 | 2 | DLVFITHPDQR                 | 2d   | 28 |
| FBgn0000559 | 746.29  | 77 | 3 | EGLPDLSQYLDKL               | 2d   | 28 |
| FBgn0000559 | 547.5   | 38 | 1 | VNFTVDEIR                   | 2d   | 28 |
| FBgn0000559 | 746.27  | 60 | 2 | EGLPDLSQYLDKL               | 12d  | 28 |
| FBgn0000559 | 746.4   | 69 | 2 | EGLPDLSQYLDKL               | 22d  | 28 |
| FBgn0000559 | 745.97  | 42 | 1 | EGLPDLSQYLDKL               | 32d  | 28 |
| FBgn0000559 | 746.43  | 61 | 2 | EGLPDLSQYLDKL               | 36d  | 28 |
| FBgn0000559 | 746.57  | 51 | 1 | EGLPDLSQYLDKL               | 42d  | 28 |

|             |         |     |    |                                  |     |    |
|-------------|---------|-----|----|----------------------------------|-----|----|
| FBgn0000559 | 746.23  | 62  | 2  | EGLPDL SQYLDKL                   | 46d | 28 |
| FBgn0000559 | 746.49  | 83  | 2  | EGLPDL SQYLDKL                   | 52d | 28 |
| FBgn0000559 | 746.55  | 55  | 2  | EGLPDL SQYLDKL                   | 56d | 28 |
| FBgn0000579 | 883.1   | 90  | 4  | AAVPSGASTGVHEALELR               | 2d  | 18 |
| FBgn0000579 | 947.46  | 68  | 1  | ANLDVVDQASIDNFMIK                | 2d  | 18 |
| FBgn0000579 | 782.53  | 90  | 3  | AVGHVNDTLGPELIK                  | 2d  | 18 |
| FBgn0000579 | 551.4   | 55  | 3  | DGQYDLDFK                        | 2d  | 18 |
| FBgn0000579 | 629.93  | 68  | 3  | EALNLISDAIAK                     | 2d  | 18 |
| FBgn0000579 | 1105.07 | 82  | 2  | FGLDATAVGDEGGFAPNIQSNK           | 2d  | 18 |
| FBgn0000579 | 620.55  | 46  | 2  | LANLYKEFIK                       | 2d  | 18 |
| FBgn0000579 | 1127.25 | 93  | 4  | SGETEDSFIGDLVVGLSTGQIK           | 2d  | 18 |
| FBgn0000579 | 933.38  | 105 | 3  | VNQIGTVTESIAAHLAK                | 2d  | 18 |
| FBgn0000579 | 883.27  | 93  | 3  | AAVPSGASTGVHEALELR               | 22d | 18 |
| FBgn0000579 | 782.35  | 75  | 3  | AVGHVNDTLGPELIK                  | 22d | 18 |
| FBgn0000579 | 551.13  | 57  | 2  | DGQYDLDFK                        | 22d | 18 |
| FBgn0000579 | 629.52  | 76  | 3  | EALNLISDAIAK                     | 22d | 18 |
| FBgn0000579 | 1074.56 | 75  | 3  | EIILPVPFNVINGGSHAGNK             | 22d | 18 |
| FBgn0000579 | 1105.26 | 108 | 3  | FGLDATAVGDEGGFAPNIQSNK           | 22d | 18 |
| FBgn0000579 | 620.14  | 55  | 3  | LANLYKEFIK                       | 22d | 18 |
| FBgn0000579 | 1127.23 | 85  | 1  | SGETEDSFIGDLVVGLSTGQIK           | 22d | 18 |
| FBgn0000579 | 933.47  | 87  | 6  | VNQIGTVTESIAAHLAK                | 22d | 18 |
| FBgn0000579 | 883.12  | 82  | 3  | AAVPSGASTGVHEALELR               | 42d | 18 |
| FBgn0000579 | 947.41  | 58  | 1  | ANLDVVDQASIDNFMIK                | 42d | 18 |
| FBgn0000579 | 782.5   | 65  | 2  | AVGHVNDTLGPELIK                  | 42d | 18 |
| FBgn0000579 | 629.75  | 60  | 1  | EALNLISDAIAK                     | 42d | 18 |
| FBgn0000579 | 1074.52 | 78  | 3  | EIILPVPFNVINGGSHAGNK             | 42d | 18 |
| FBgn0000579 | 1104.9  | 91  | 3  | FGLDATAVGDEGGFAPNIQSNK           | 42d | 18 |
| FBgn0000579 | 470.25  | 41  | 1  | HIADLAGNK                        | 42d | 18 |
| FBgn0000579 | 620.47  | 48  | 3  | LANLYKEFIK                       | 42d | 18 |
| FBgn0000579 | 1126.99 | 38  | 1  | NGWGTMVSHRSGETEDSFIGDLVVGLSTGQIK | 42d | 18 |
| FBgn0000579 | 1127.19 | 104 | 11 | SGETEDSFIGDLVVGLSTGQIK           | 42d | 18 |
| FBgn0000579 | 933.58  | 100 | 7  | VNQIGTVTESIAAHLAK                | 42d | 18 |

|             |         |     |   |                                  |      |    |
|-------------|---------|-----|---|----------------------------------|------|----|
| FBgn0000579 | 883.25  | 105 | 2 | AAVPSGASTGVHEALELR               | 62d  | 18 |
| FBgn0000579 | 782.54  | 69  | 2 | AVGHVNDTLGPELIK                  | 62d  | 18 |
| FBgn0000579 | 550.74  | 59  | 2 | DGQYDLDFK                        | 62d  | 18 |
| FBgn0000579 | 629.97  | 64  | 3 | EALNLISDAIAK                     | 62d  | 18 |
| FBgn0000579 | 1074.44 | 71  | 2 | EIILPVPAFN VingGSHAGNK           | 62d  | 18 |
| FBgn0000579 | 1105.12 | 103 | 4 | FGLDATAVGDEGGFAPNIQSNK           | 62d  | 18 |
| FBgn0000579 | 620.18  | 47  | 4 | LANLYKEFIK                       | 62d  | 18 |
| FBgn0000579 | 1127.29 | 87  | 7 | SGETEDSFIGDLVVGLSTGQIK           | 62d  | 18 |
| FBgn0000579 | 473.32  | 36  | 2 | SQWLPAK                          | 62d  | 18 |
| FBgn0000579 | 933.32  | 102 | 3 | VNQIGTVTESIAAHLAK                | 62d  | 18 |
| FBgn0000579 | 883.41  | 93  | 5 | AAVPSGASTGVHEALELR               | 82d  | 18 |
| FBgn0000579 | 782.36  | 63  | 3 | AVGHVNDTLGPELIK                  | 82d  | 18 |
| FBgn0000579 | 551.29  | 47  | 1 | DGQYDLDFK                        | 82d  | 18 |
| FBgn0000579 | 630.07  | 70  | 1 | EALNLISDAIAK                     | 82d  | 18 |
| FBgn0000579 | 1074.49 | 37  | 1 | EIILPVPAFN VingGSHAGNK           | 82d  | 18 |
| FBgn0000579 | 1104.87 | 87  | 2 | FGLDATAVGDEGGFAPNIQSNK           | 82d  | 18 |
| FBgn0000579 | 1126.43 | 45  | 1 | NGWGTMVSHRSGETEDSFIGDLVVGLSTGQIK | 82d  | 18 |
| FBgn0000579 | 1126.4  | 136 | 5 | SGETEDSFIGDLVVGLSTGQIK           | 82d  | 18 |
| FBgn0000579 | 473.25  | 34  | 1 | SQWLPAK                          | 82d  | 18 |
| FBgn0000579 | 933.48  | 83  | 3 | VNQIGTVTESIAAHLAK                | 82d  | 18 |
| FBgn0000579 | 589.14  | 68  | 1 | AAVPSGASTGVHEALELR               | 102d | 18 |
| FBgn0000579 | 947.68  | 63  | 1 | ANLDVVDQASIDNFMK                 | 102d | 18 |
| FBgn0000579 | 782.66  | 63  | 1 | AVGHVNDTLGPELIK                  | 102d | 18 |
| FBgn0000579 | 629.62  | 68  | 2 | EALNLISDAIAK                     | 102d | 18 |
| FBgn0000579 | 1074.71 | 61  | 3 | EIILPVPAFN VingGSHAGNK           | 102d | 18 |
| FBgn0000579 | 1105.05 | 101 | 3 | FGLDATAVGDEGGFAPNIQSNK           | 102d | 18 |
| FBgn0000579 | 366.53  | 42  | 1 | IATAVEK                          | 102d | 18 |
| FBgn0000579 | 620.33  | 46  | 1 | LANLYKEFIK                       | 102d | 18 |
| FBgn0000579 | 620.07  | 38  | 1 | LANLYQEFIK                       | 102d | 18 |
| FBgn0000579 | 1126.94 | 42  | 1 | NGWGTMVSHRSGETEDSFIGDLVVGLSTGQIK | 102d | 18 |
| FBgn0000579 | 1127.2  | 83  | 4 | SGETEDSFIGDLVVGLSTGQIK           | 102d | 18 |
| FBgn0000579 | 933.69  | 81  | 2 | VNQIGTVTESIAAHLAK                | 102d | 18 |

|             |         |     |   |                                  |      |    |
|-------------|---------|-----|---|----------------------------------|------|----|
| FBgn0000579 | 883.16  | 80  | 1 | AAVPSGASTGVHEALELR               | 112d | 18 |
| FBgn0000579 | 782.45  | 77  | 2 | AVGHVNDTLGPELIK                  | 112d | 18 |
| FBgn0000579 | 629.98  | 81  | 3 | EALNLISDAIAK                     | 112d | 18 |
| FBgn0000579 | 1074.5  | 69  | 2 | EIILPVPAFN VingGSHAGNK           | 112d | 18 |
| FBgn0000579 | 1105.05 | 122 | 1 | FGLDATAVGDEGGFAPNIQSNK           | 112d | 18 |
| FBgn0000579 | 470.45  | 42  | 1 | HIADLAGNK                        | 112d | 18 |
| FBgn0000579 | 619.62  | 41  | 1 | LANLYQEFIK                       | 112d | 18 |
| FBgn0000579 | 1126.62 | 36  | 1 | NGWGTMVSHRSGETEDSFIGDLVVGLSTGQIK | 112d | 18 |
| FBgn0000579 | 1127.04 | 83  | 4 | SGETEDSFIGDLVVGLSTGQIK           | 112d | 18 |
| FBgn0000579 | 933.43  | 84  | 2 | VNQIGTVTESIAAHLAK                | 112d | 18 |
| FBgn0000579 | 883.61  | 90  | 3 | AAVPSGASTGVHEALELR               | 122d | 18 |
| FBgn0000579 | 782.56  | 74  | 2 | AVGHVNDTLGPELIK                  | 122d | 18 |
| FBgn0000579 | 629.86  | 75  | 3 | EALNLISDAIAK                     | 122d | 18 |
| FBgn0000579 | 1074.58 | 52  | 3 | EIILPVPAFN VingGSHAGNK           | 122d | 18 |
| FBgn0000579 | 1105.18 | 95  | 3 | FGLDATAVGDEGGFAPNIQSNK           | 122d | 18 |
| FBgn0000579 | 973.21  | 35  | 1 | IDLSYDHENLGADAALVK               | 122d | 18 |
| FBgn0000579 | 620.44  | 46  | 2 | LANLYKEFIK                       | 122d | 18 |
| FBgn0000579 | 1126.91 | 34  | 1 | NGWGTMVSHRSGETEDSFIGDLVVGLSTGQIK | 122d | 18 |
| FBgn0000579 | 1126.83 | 91  | 3 | SGETEDSFIGDLVVGLSTGQIK           | 122d | 18 |
| FBgn0000579 | 933.59  | 104 | 3 | VNQIGTVTESIAAHLAK                | 122d | 18 |
| FBgn0000579 | 883.41  | 83  | 3 | AAVPSGASTGVHEALELR               | 132d | 18 |
| FBgn0000579 | 782.52  | 68  | 2 | AVGHVNDTLGPELIK                  | 132d | 18 |
| FBgn0000579 | 551.42  | 57  | 3 | DGQYDLDFK                        | 132d | 18 |
| FBgn0000579 | 630.09  | 63  | 3 | EALNLISDAIAK                     | 132d | 18 |
| FBgn0000579 | 1074.34 | 61  | 1 | EIILPVPAFN VingGSHAGNK           | 132d | 18 |
| FBgn0000579 | 1105.22 | 83  | 1 | FGLDATAVGDEGGFAPNIQSNK           | 132d | 18 |
| FBgn0000579 | 619.58  | 50  | 3 | LANLYKEFIK                       | 132d | 18 |
| FBgn0000579 | 1126.93 | 82  | 3 | SGETEDSFIGDLVVGLSTGQIK           | 132d | 18 |
| FBgn0000579 | 622.73  | 78  | 2 | VNQIGTVTESIAAHLAK                | 132d | 18 |
| FBgn0000579 | 883.08  | 73  | 1 | AAVPSGASTGVHEALELR               | 142d | 18 |
| FBgn0000579 | 947.72  | 44  | 1 | ANLDVVDQASIDNFMIK                | 142d | 18 |
| FBgn0000579 | 629.79  | 53  | 2 | EALNLISDAIAK                     | 142d | 18 |

|             |         |     |   |                                  |      |    |
|-------------|---------|-----|---|----------------------------------|------|----|
| FBgn0000579 | 1105.16 | 91  | 1 | FGLDATAVGDEGGFAPNIQSNK           | 142d | 18 |
| FBgn0000579 | 620.59  | 46  | 2 | LANLYKEFIK                       | 142d | 18 |
| FBgn0000579 | 1127.1  | 60  | 3 | SGETEDSFIGDLVVGLSTGQIK           | 142d | 18 |
| FBgn0000579 | 933.43  | 65  | 3 | VNQIGTVTESIAAHLAK                | 142d | 18 |
| FBgn0000579 | 883.32  | 104 | 6 | AAVPSGASTGVHEALELR               | 2d   | 28 |
| FBgn0000579 | 947.64  | 69  | 2 | ANLDVVDQASIDNFMK                 | 2d   | 28 |
| FBgn0000579 | 782.38  | 77  | 3 | AVGHVNDTLGPELIK                  | 2d   | 28 |
| FBgn0000579 | 551.17  | 59  | 3 | DGQYDLDFK                        | 2d   | 28 |
| FBgn0000579 | 629.75  | 73  | 3 | EALNLISDAIAK                     | 2d   | 28 |
| FBgn0000579 | 716.84  | 50  | 3 | EIILPVPAFNVINGGSHAGNK            | 2d   | 28 |
| FBgn0000579 | 737.06  | 74  | 2 | FGLDATAVGDEGGFAPNIQSNK           | 2d   | 28 |
| FBgn0000579 | 523.24  | 58  | 5 | IEEEIGAGVK                       | 2d   | 28 |
| FBgn0000579 | 620.14  | 46  | 2 | LANLYKEFIK                       | 2d   | 28 |
| FBgn0000579 | 1126.91 | 74  | 3 | SGETEDSFIGDLVVGLSTGQIK           | 2d   | 28 |
| FBgn0000579 | 473.31  | 34  | 1 | SQWLPADK                         | 2d   | 28 |
| FBgn0000579 | 933.71  | 91  | 5 | VNQIGTVTESIAAHLAK                | 2d   | 28 |
| FBgn0000579 | 883.12  | 84  | 3 | AAVPSGASTGVHEALELR               | 12d  | 28 |
| FBgn0000579 | 947.37  | 61  | 2 | ANLDVVDQASIDNFMK                 | 12d  | 28 |
| FBgn0000579 | 956.19  | 34  | 1 | ANLDVVDQASIDNFMKLDGTENKSK        | 12d  | 28 |
| FBgn0000579 | 782.42  | 77  | 3 | AVGHVNDTLGPELIK                  | 12d  | 28 |
| FBgn0000579 | 551.11  | 55  | 1 | DGQYDLDFK                        | 12d  | 28 |
| FBgn0000579 | 629.47  | 75  | 3 | EALNLISDAIAK                     | 12d  | 28 |
| FBgn0000579 | 1074.66 | 75  | 3 | EIILPVPAFNVINGGSHAGNK            | 12d  | 28 |
| FBgn0000579 | 1105.15 | 94  | 2 | FGLDATAVGDEGGFAPNIQSNK           | 12d  | 28 |
| FBgn0000579 | 620.43  | 54  | 3 | LANLYKEFIK                       | 12d  | 28 |
| FBgn0000579 | 1126.95 | 35  | 2 | NGWGTMVSHRSGETEDSFIGDLVVGLSTGQIK | 12d  | 28 |
| FBgn0000579 | 1127.1  | 115 | 3 | SGETEDSFIGDLVVGLSTGQIK           | 12d  | 28 |
| FBgn0000579 | 622.37  | 91  | 5 | VNQIGTVTESIAAHLAK                | 12d  | 28 |
| FBgn0000579 | 883.26  | 98  | 3 | AAVPSGASTGVHEALELR               | 22d  | 28 |
| FBgn0000579 | 782.34  | 66  | 3 | AVGHVNDTLGPELIK                  | 22d  | 28 |
| FBgn0000579 | 551.47  | 55  | 2 | DGQYDLDFK                        | 22d  | 28 |
| FBgn0000579 | 629.9   | 79  | 2 | EALNLISDAIAK                     | 22d  | 28 |

|             |         |     |   |                                  |     |    |
|-------------|---------|-----|---|----------------------------------|-----|----|
| FBgn0000579 | 1105.02 | 103 | 3 | FGLDATAVGDEGGFAPNIQSNK           | 22d | 28 |
| FBgn0000579 | 1126.28 | 53  | 3 | SGETEDSFIGDLVVGLSTGQIK           | 22d | 28 |
| FBgn0000579 | 933.33  | 78  | 4 | VNQIGTVTESIAAHLAK                | 22d | 28 |
| FBgn0000579 | 883.27  | 96  | 3 | AAVPSGASTGVHEALELR               | 32d | 28 |
| FBgn0000579 | 782.62  | 62  | 3 | AVGHVNDTLGPELIK                  | 32d | 28 |
| FBgn0000579 | 551.24  | 47  | 3 | DGQYDLDFK                        | 32d | 28 |
| FBgn0000579 | 629.78  | 73  | 3 | EALNLISDAIAK                     | 32d | 28 |
| FBgn0000579 | 1105.15 | 106 | 3 | FGLDATAVGDEGGFAPNIQSNK           | 32d | 28 |
| FBgn0000579 | 620.4   | 55  | 1 | LANLYKEFIK                       | 32d | 28 |
| FBgn0000579 | 1126.99 | 37  | 2 | NGWGTMVSHRSGETEDSFIGDLVVGLSTGQIK | 32d | 28 |
| FBgn0000579 | 1127.03 | 106 | 7 | SGETEDSFIGDLVVGLSTGQIK           | 32d | 28 |
| FBgn0000579 | 473.47  | 40  | 1 | SQWLPAK                          | 32d | 28 |
| FBgn0000579 | 933.24  | 103 | 4 | VNQIGTVTESIAAHLAK                | 32d | 28 |
| FBgn0000579 | 883.11  | 85  | 3 | AAVPSGASTGVHEALELR               | 36d | 28 |
| FBgn0000579 | 782.26  | 66  | 2 | AVGHVNDTLGPELIK                  | 36d | 28 |
| FBgn0000579 | 551.46  | 55  | 3 | DGQYDLDFK                        | 36d | 28 |
| FBgn0000579 | 629.84  | 58  | 4 | EALNLISDAIAK                     | 36d | 28 |
| FBgn0000579 | 1074.6  | 55  | 2 | EIILPVPAFN VingGSHAGNK           | 36d | 28 |
| FBgn0000579 | 1105.13 | 87  | 2 | FGLDATAVGDEGGFAPNIQSNK           | 36d | 28 |
| FBgn0000579 | 620.46  | 46  | 2 | LANLYKEFIK                       | 36d | 28 |
| FBgn0000579 | 1127.27 | 78  | 6 | SGETEDSFIGDLVVGLSTGQIK           | 36d | 28 |
| FBgn0000579 | 622.36  | 73  | 3 | VNQIGTVTESIAAHLAK                | 36d | 28 |
| FBgn0000579 | 883.52  | 99  | 3 | AAVPSGASTGVHEALELR               | 42d | 28 |
| FBgn0000579 | 782.2   | 75  | 3 | AVGHVNDTLGPELIK                  | 42d | 28 |
| FBgn0000579 | 551.26  | 55  | 3 | DGQYDLDFK                        | 42d | 28 |
| FBgn0000579 | 630.03  | 74  | 1 | EALNLISDAIAK                     | 42d | 28 |
| FBgn0000579 | 1074.57 | 52  | 2 | EIILPVPAFN VingGSHAGNK           | 42d | 28 |
| FBgn0000579 | 1104.94 | 109 | 3 | FGLDATAVGDEGGFAPNIQSNK           | 42d | 28 |
| FBgn0000579 | 620.29  | 47  | 3 | LANLYKEFIK                       | 42d | 28 |
| FBgn0000579 | 1126.8  | 39  | 1 | NGWGTMVSHRSGETEDSFIGDLVVGLSTGQIK | 42d | 28 |
| FBgn0000579 | 1127.14 | 74  | 6 | SGETEDSFIGDLVVGLSTGQIK           | 42d | 28 |
| FBgn0000579 | 622.24  | 104 | 5 | VNQIGTVTESIAAHLAK                | 42d | 28 |

|             |         |     |   |                                  |     |    |
|-------------|---------|-----|---|----------------------------------|-----|----|
| FBgn0000579 | 883.21  | 81  | 3 | AAVPSGASTGVHEALELR               | 46d | 28 |
| FBgn0000579 | 947.58  | 71  | 2 | ANLDVVDQASIDNFMIK                | 46d | 28 |
| FBgn0000579 | 782.26  | 66  | 3 | AVGHVNDTLGPELIK                  | 46d | 28 |
| FBgn0000579 | 551.42  | 39  | 2 | DGQYDLDFK                        | 46d | 28 |
| FBgn0000579 | 629.88  | 73  | 3 | EALNLISDAIAK                     | 46d | 28 |
| FBgn0000579 | 1074.61 | 72  | 3 | EIILPVPAFN VingGSHAGNK           | 46d | 28 |
| FBgn0000579 | 1105.04 | 122 | 3 | FGLDATAVGDEGGFAPNIQSNK           | 46d | 28 |
| FBgn0000579 | 620.48  | 50  | 1 | LANLYKEFIK                       | 46d | 28 |
| FBgn0000579 | 620.31  | 46  | 1 | LANLYQEFIK                       | 46d | 28 |
| FBgn0000579 | 1127.13 | 87  | 3 | SGETEDSFIGDLVVGLSTGQIK           | 46d | 28 |
| FBgn0000579 | 933.68  | 109 | 6 | VNQIGTVTESIAAHLAK                | 46d | 28 |
| FBgn0000579 | 883.24  | 89  | 3 | AAVPSGASTGVHEALELR               | 50d | 28 |
| FBgn0000579 | 522.04  | 65  | 3 | AVGHVNDTLGPELIK                  | 50d | 28 |
| FBgn0000579 | 551.12  | 55  | 3 | DGQYDLDFK                        | 50d | 28 |
| FBgn0000579 | 629.68  | 74  | 6 | EALNLISDAIAK                     | 50d | 28 |
| FBgn0000579 | 1074.55 | 68  | 3 | EIILPVPAFN VingGSHAGNK           | 50d | 28 |
| FBgn0000579 | 1105.16 | 77  | 3 | FGLDATAVGDEGGFAPNIQSNK           | 50d | 28 |
| FBgn0000579 | 620.02  | 59  | 3 | LANLYKEFIK                       | 50d | 28 |
| FBgn0000579 | 1126.9  | 49  | 2 | NGWGTMVSHRSGETEDSFIGDLVVGLSTGQIK | 50d | 28 |
| FBgn0000579 | 1126.76 | 97  | 4 | SGETEDSFIGDLVVGLSTGQIK           | 50d | 28 |
| FBgn0000579 | 933.66  | 81  | 3 | VNQIGTVTESIAAHLAK                | 50d | 28 |
| FBgn0000579 | 883.37  | 92  | 3 | AAVPSGASTGVHEALELR               | 52d | 28 |
| FBgn0000579 | 782.62  | 45  | 2 | AVGHVNDTLGPELIK                  | 52d | 28 |
| FBgn0000579 | 551.31  | 56  | 1 | DGQYDLDFK                        | 52d | 28 |
| FBgn0000579 | 629.96  | 70  | 2 | EALNLISDAIAK                     | 52d | 28 |
| FBgn0000579 | 1074.19 | 64  | 3 | EIILPVPAFN VingGSHAGNK           | 52d | 28 |
| FBgn0000579 | 1104.86 | 97  | 3 | FGLDATAVGDEGGFAPNIQSNK           | 52d | 28 |
| FBgn0000579 | 620.28  | 56  | 2 | LANLYKEFIK                       | 52d | 28 |
| FBgn0000579 | 1127.27 | 92  | 6 | SGETEDSFIGDLVVGLSTGQIK           | 52d | 28 |
| FBgn0000579 | 933.56  | 92  | 3 | VNQIGTVTESIAAHLAK                | 52d | 28 |
| FBgn0000579 | 883.51  | 51  | 2 | AAVPSGASTGVHEALELR               | 56d | 28 |
| FBgn0000579 | 947.32  | 54  | 2 | ANLDVVDQASIDNFMIK                | 56d | 28 |

|             |         |    |   |                                  |      |    |
|-------------|---------|----|---|----------------------------------|------|----|
| FBgn0000579 | 782.51  | 67 | 2 | AVGHVNDTLGPELIK                  | 56d  | 28 |
| FBgn0000579 | 629.66  | 62 | 4 | EALNLISDAIAK                     | 56d  | 28 |
| FBgn0000579 | 1074.79 | 83 | 3 | EIILPVPAFNVINGGSHAGNK            | 56d  | 28 |
| FBgn0000579 | 1105.27 | 91 | 3 | FGLDATAVGDEGGFAPNIQSNK           | 56d  | 28 |
| FBgn0000579 | 620.5   | 38 | 2 | LANLYKEFIK                       | 56d  | 28 |
| FBgn0000579 | 1126.76 | 35 | 1 | NGWGTMVSHRSGETEDSFIGDLVVGLSTGQIK | 56d  | 28 |
| FBgn0000579 | 1126.95 | 78 | 7 | SGETEDSFIGDLVVGLSTGQIK           | 56d  | 28 |
| FBgn0000579 | 933.51  | 91 | 3 | VNQIGTVTESIAAHLAK                | 56d  | 28 |
| FBgn0000634 | 1155.78 | 98 | 2 | ESVYDAAGQHTFLVPVDEGFK            | 2d   | 18 |
| FBgn0000634 | 784.87  | 52 | 1 | FSQESGSVILPTFR                   | 2d   | 18 |
| FBgn0000634 | 709.34  | 43 | 1 | LESDPMMSDTYK                     | 2d   | 18 |
| FBgn0000634 | 739.35  | 64 | 2 | NAEEFNVDNIGVR                    | 2d   | 18 |
| FBgn0000634 | 940.07  | 35 | 1 | QIMHIIDEVLEPLTVK                 | 2d   | 18 |
| FBgn0000634 | 533.07  | 40 | 1 | ASAAFEDLLK                       | 22d  | 18 |
| FBgn0000634 | 1155.53 | 76 | 2 | ESVYDAAGQHTFLVPVDEGFK            | 22d  | 18 |
| FBgn0000634 | 784.71  | 49 | 2 | FSQESGSVILPTFR                   | 22d  | 18 |
| FBgn0000634 | 709.45  | 51 | 1 | LESDPMMSDTYK                     | 22d  | 18 |
| FBgn0000634 | 739.26  | 77 | 3 | NAEEFNVDNIGVR                    | 22d  | 18 |
| FBgn0000634 | 1155.46 | 98 | 3 | ESVYDAAGQHTFLVPVDEGFK            | 42d  | 18 |
| FBgn0000634 | 785.14  | 44 | 1 | FSQESGSVILPTFR                   | 42d  | 18 |
| FBgn0000634 | 739.2   | 76 | 3 | NAEEFNVDNIGVR                    | 42d  | 18 |
| FBgn0000634 | 940.11  | 64 | 3 | QIMHIIDEVLEPLTVK                 | 42d  | 18 |
| FBgn0000634 | 718.9   | 51 | 2 | AGHSDTPNNPNALK                   | 62d  | 18 |
| FBgn0000634 | 1155.39 | 98 | 2 | ESVYDAAGQHTFLVPVDEGFK            | 62d  | 18 |
| FBgn0000634 | 785.14  | 48 | 1 | FSQESGSVILPTFR                   | 62d  | 18 |
| FBgn0000634 | 739.5   | 49 | 1 | NAEEFNVDNIGVR                    | 62d  | 18 |
| FBgn0000634 | 940.1   | 50 | 2 | QIMHIIDEVLEPLTVK                 | 62d  | 18 |
| FBgn0000634 | 1155.59 | 86 | 2 | ESVYDAAGQHTFLVPVDEGFK            | 82d  | 18 |
| FBgn0000634 | 1033.86 | 42 | 1 | INVYRPDVECTNGIIHVIDYPLLEEK       | 82d  | 18 |
| FBgn0000634 | 739.46  | 77 | 3 | NAEEFNVDNIGVR                    | 82d  | 18 |
| FBgn0000634 | 580.92  | 37 | 1 | TELDYPSAHK                       | 82d  | 18 |
| FBgn0000634 | 718.87  | 40 | 1 | AGHSDTPNNPNALK                   | 102d | 18 |



|             |         |     |   |                       |      |    |
|-------------|---------|-----|---|-----------------------|------|----|
| FBgn0000634 | 1155.65 | 73  | 1 | ESVYDAAGQHTFLVPVDEGFK | 102d | 18 |
| FBgn0000634 | 738.83  | 56  | 1 | NAEEFNVDNIGVR         | 102d | 18 |
| FBgn0000634 | 1155.42 | 78  | 1 | ESVYDAAGQHTFLVPVDEGFK | 112d | 18 |
| FBgn0000634 | 784.93  | 42  | 2 | FSQESGSVILPTFR        | 112d | 18 |
| FBgn0000634 | 739.38  | 75  | 1 | NAEEFNVDNIGVR         | 112d | 18 |
| FBgn0000634 | 1155.78 | 73  | 1 | ESVYDAAGQHTFLVPVDEGFK | 122d | 18 |
| FBgn0000634 | 785.05  | 39  | 1 | FSQESGSVILPTFR        | 122d | 18 |
| FBgn0000634 | 1009.96 | 44  | 1 | LPNTVSSDMAGNPPLYITK   | 122d | 18 |
| FBgn0000634 | 739.24  | 73  | 2 | NAEEFNVDNIGVR         | 122d | 18 |
| FBgn0000634 | 709.42  | 66  | 2 | LESDFMMSDTYK          | 132d | 18 |
| FBgn0000634 | 739.52  | 70  | 2 | NAEEFNVDNIGVR         | 132d | 18 |
| FBgn0000634 | 770.87  | 77  | 3 | ESVYDAAGQHTFLVPVDEGFK | 142d | 18 |
| FBgn0000634 | 784.89  | 38  | 1 | FSQESGSVILPTFR        | 142d | 18 |
| FBgn0000634 | 739.34  | 71  | 3 | NAEEFNVDNIGVR         | 142d | 18 |
| FBgn0000634 | 718.66  | 43  | 1 | AGHSDFPNNPNALK        | 2d   | 28 |
| FBgn0000634 | 1155.57 | 102 | 3 | ESVYDAAGQHTFLVPVDEGFK | 2d   | 28 |
| FBgn0000634 | 808.75  | 46  | 1 | IIPSLSVETNSDGKR       | 2d   | 28 |
| FBgn0000634 | 709.21  | 85  | 1 | LESDFMMSDTYK          | 2d   | 28 |
| FBgn0000634 | 739.16  | 96  | 3 | NAEEFNVDNIGVR         | 2d   | 28 |
| FBgn0000634 | 581.37  | 41  | 3 | TELDYPSAHK            | 2d   | 28 |
| FBgn0000634 | 533.52  | 42  | 2 | ASAAFEDLLK            | 12d  | 28 |
| FBgn0000634 | 1155.52 | 76  | 1 | ESVYDAAGQHTFLVPVDEGFK | 12d  | 28 |
| FBgn0000634 | 785.06  | 40  | 2 | FSQESGSVILPTFR        | 12d  | 28 |
| FBgn0000634 | 808.8   | 68  | 3 | IIPSLSVETNSDGKR       | 12d  | 28 |
| FBgn0000634 | 709.18  | 73  | 2 | LESDFMMSDTYK          | 12d  | 28 |
| FBgn0000634 | 739.26  | 83  | 3 | NAEEFNVDNIGVR         | 12d  | 28 |
| FBgn0000634 | 940.18  | 44  | 2 | QIMHIIIDEVLEPLTVK     | 12d  | 28 |
| FBgn0000634 | 1155.51 | 90  | 3 | ESVYDAAGQHTFLVPVDEGFK | 22d  | 28 |
| FBgn0000634 | 785.15  | 42  | 1 | FSQESGSVILPTFR        | 22d  | 28 |
| FBgn0000634 | 739.38  | 73  | 2 | NAEEFNVDNIGVR         | 22d  | 28 |
| FBgn0000634 | 1155.54 | 74  | 2 | ESVYDAAGQHTFLVPVDEGFK | 32d  | 28 |
| FBgn0000634 | 784.72  | 48  | 3 | FSQESGSVILPTFR        | 32d  | 28 |

|             |         |     |   |                       |     |    |
|-------------|---------|-----|---|-----------------------|-----|----|
| FBgn0000634 | 709.27  | 84  | 2 | LESDPMMSDTYK          | 32d | 28 |
| FBgn0000634 | 739.15  | 96  | 3 | NAEEFNVDNIGVR         | 32d | 28 |
| FBgn0000634 | 770.73  | 40  | 1 | ESVYDAAGQHTFLVPVDEGFK | 36d | 28 |
| FBgn0000634 | 709.33  | 66  | 2 | LESDPMMSDTYK          | 36d | 28 |
| FBgn0000634 | 739.43  | 96  | 3 | NAEEFNVDNIGVR         | 36d | 28 |
| FBgn0000634 | 533.12  | 51  | 2 | ASAAFEDLLK            | 42d | 28 |
| FBgn0000634 | 1155.37 | 117 | 2 | ESVYDAAGQHTFLVPVDEGFK | 42d | 28 |
| FBgn0000634 | 709.2   | 70  | 3 | LESDPMMSDTYK          | 42d | 28 |
| FBgn0000634 | 739.34  | 76  | 3 | NAEEFNVDNIGVR         | 42d | 28 |
| FBgn0000634 | 1155.38 | 96  | 3 | ESVYDAAGQHTFLVPVDEGFK | 46d | 28 |
| FBgn0000634 | 785.07  | 45  | 1 | FSQESGSVILPTFR        | 46d | 28 |
| FBgn0000634 | 709.18  | 71  | 3 | LESDPMMSDTYK          | 46d | 28 |
| FBgn0000634 | 739.35  | 71  | 2 | NAEEFNVDNIGVR         | 46d | 28 |
| FBgn0000634 | 661.23  | 51  | 1 | NSNGDIFVNNAR          | 46d | 28 |
| FBgn0000634 | 784.79  | 52  | 2 | FSQESGSVILPTFR        | 50d | 28 |
| FBgn0000634 | 709.42  | 72  | 2 | LESDPMMSDTYK          | 50d | 28 |
| FBgn0000634 | 739.18  | 75  | 3 | NAEEFNVDNIGVR         | 50d | 28 |
| FBgn0000634 | 1155.48 | 88  | 2 | ESVYDAAGQHTFLVPVDEGFK | 52d | 28 |
| FBgn0000634 | 784.83  | 50  | 2 | FSQESGSVILPTFR        | 52d | 28 |
| FBgn0000634 | 709.36  | 66  | 2 | LESDPMMSDTYK          | 52d | 28 |
| FBgn0000634 | 739.55  | 90  | 1 | NAEEFNVDNIGVR         | 52d | 28 |
| FBgn0000634 | 1155.48 | 87  | 2 | ESVYDAAGQHTFLVPVDEGFK | 56d | 28 |
| FBgn0000634 | 784.79  | 45  | 3 | FSQESGSVILPTFR        | 56d | 28 |
| FBgn0000667 | 668.29  | 39  | 1 | ATLGEADKEFNLIVNLVR    | 2d  | 18 |
| FBgn0000667 | 661.4   | 87  | 3 | GISQEQLNEFR           | 2d  | 18 |
| FBgn0000667 | 864.36  | 67  | 2 | ILAADKPYILPDELRL      | 2d  | 18 |
| FBgn0000667 | 723.77  | 49  | 3 | LSNRPAYLPTEGK         | 2d  | 18 |
| FBgn0000667 | 935.69  | 48  | 1 | MLDPDDLINTPKPDER      | 2d  | 18 |
| FBgn0000667 | 722.61  | 64  | 2 | NINEVENQILTR          | 2d  | 18 |
| FBgn0000667 | 708.64  | 71  | 2 | VGWEQLLTSINR          | 2d  | 18 |
| FBgn0000667 | 681.39  | 65  | 1 | AAPFNWLDGTR           | 22d | 18 |
| FBgn0000667 | 661.29  | 62  | 1 | GISQEQLNEFR           | 22d | 18 |

|             |         |    |   |                     |      |    |
|-------------|---------|----|---|---------------------|------|----|
| FBgn0000667 | 722.51  | 61 | 2 | NINEVENQILTR        | 22d  | 18 |
| FBgn0000667 | 708.77  | 73 | 3 | VGWEQLLTSINR        | 22d  | 18 |
| FBgn0000667 | 895.93  | 54 | 2 | DNPLENLNTAFDVAEK    | 42d  | 18 |
| FBgn0000667 | 907.83  | 67 | 2 | ESTD TD TAEQVIDSFR  | 42d  | 18 |
| FBgn0000667 | 864.46  | 86 | 2 | ILAADKPYILPDEL R    | 42d  | 18 |
| FBgn0000667 | 608.75  | 78 | 3 | LASDLLEWIR          | 42d  | 18 |
| FBgn0000667 | 708.88  | 61 | 1 | VGWEQLLTSINR        | 42d  | 18 |
| FBgn0000667 | 726.24  | 50 | 1 | AGTAIDNIEEDFR       | 62d  | 18 |
| FBgn0000667 | 1002.01 | 71 | 1 | ATLGEADKEFN LIVNLVR | 62d  | 18 |
| FBgn0000667 | 895.83  | 40 | 1 | DNPLENLNTAFDVAEK    | 62d  | 18 |
| FBgn0000667 | 907.98  | 87 | 1 | ESTD TD TAEQVIDSFR  | 62d  | 18 |
| FBgn0000667 | 661.25  | 85 | 2 | GISQEQ LNEFR        | 62d  | 18 |
| FBgn0000667 | 609.02  | 78 | 1 | LASDLLEWIR          | 62d  | 18 |
| FBgn0000667 | 708.97  | 84 | 2 | VGWEQLLTSINR        | 62d  | 18 |
| FBgn0000667 | 600.25  | 64 | 2 | IDILHLEFAK          | 82d  | 18 |
| FBgn0000667 | 722.39  | 65 | 1 | NINEVENQILTR        | 82d  | 18 |
| FBgn0000667 | 668.22  | 36 | 1 | ATLGEADKEFN LIVNLVR | 102d | 18 |
| FBgn0000667 | 896.08  | 83 | 2 | DNPLENLNTAFDVAEK    | 102d | 18 |
| FBgn0000667 | 709.02  | 85 | 2 | VGWEQLLTSINR        | 102d | 18 |
| FBgn0000667 | 608.35  | 80 | 3 | LASDLLEWIR          | 112d | 18 |
| FBgn0000667 | 708.85  | 79 | 2 | VGWEQLLTSINR        | 112d | 18 |
| FBgn0000667 | 1002.11 | 52 | 1 | ATLGEADKEFN LIVNLVR | 122d | 18 |
| FBgn0000667 | 608.79  | 74 | 3 | LASDLLEWIR          | 122d | 18 |
| FBgn0000667 | 722.56  | 53 | 1 | NINEVENQILTR        | 122d | 18 |
| FBgn0000667 | 708.76  | 71 | 2 | VGWEQLLTSINR        | 122d | 18 |
| FBgn0000667 | 748.59  | 40 | 1 | AFEEWLLAETMR        | 132d | 18 |
| FBgn0000667 | 609.07  | 90 | 3 | LASDLLEWIR          | 132d | 18 |
| FBgn0000667 | 707.8   | 78 | 3 | VGWEQLLTSINR        | 132d | 18 |
| FBgn0000667 | 578.13  | 34 | 1 | ANIVGPWIER          | 142d | 18 |
| FBgn0000667 | 1002.3  | 34 | 1 | ATLGEADKEFN LIVNLVR | 142d | 18 |
| FBgn0000667 | 864.15  | 55 | 1 | ILAADKPYILPDEL R    | 142d | 18 |
| FBgn0000667 | 608.81  | 76 | 1 | LASDLLEWIR          | 142d | 18 |

|             |         |    |   |                    |      |    |
|-------------|---------|----|---|--------------------|------|----|
| FBgn0000667 | 935.55  | 35 | 1 | MLDPDDLINTPKPDER   | 142d | 18 |
| FBgn0000667 | 722.36  | 64 | 2 | NINEVENQILTR       | 142d | 18 |
| FBgn0000667 | 707.96  | 66 | 2 | VGWEQLLTSINR       | 142d | 18 |
| FBgn0000667 | 895.86  | 89 | 2 | DNPLENLNTAFDVAEK   | 2d   | 28 |
| FBgn0000667 | 661.06  | 54 | 2 | GISQEQLNEFR        | 2d   | 28 |
| FBgn0000667 | 608.66  | 42 | 2 | LASDLLEWIR         | 2d   | 28 |
| FBgn0000667 | 722.24  | 85 | 3 | NINEVENQILTR       | 2d   | 28 |
| FBgn0000667 | 708.73  | 59 | 3 | VGWEQLLTSINR       | 2d   | 28 |
| FBgn0000667 | 748.79  | 44 | 1 | AFEEWLLAETMR       | 12d  | 28 |
| FBgn0000667 | 726.26  | 36 | 1 | AGTAIDNIEEDFR      | 12d  | 28 |
| FBgn0000667 | 1002.29 | 93 | 3 | ATLGEADKEFNLIVNLVR | 12d  | 28 |
| FBgn0000667 | 907.82  | 57 | 1 | ESTDTDTAEQVIDSFR   | 12d  | 28 |
| FBgn0000667 | 661.18  | 61 | 2 | GISQEQLNEFR        | 12d  | 28 |
| FBgn0000667 | 864.52  | 77 | 3 | ILAADKPYILPDEL     | 12d  | 28 |
| FBgn0000667 | 608.49  | 73 | 3 | LASDLLEWIR         | 12d  | 28 |
| FBgn0000667 | 723.83  | 58 | 3 | LSNRPAYLPTEGK      | 12d  | 28 |
| FBgn0000667 | 722.17  | 70 | 2 | NINEVENQILTR       | 12d  | 28 |
| FBgn0000667 | 668.44  | 47 | 1 | ATLGEADKEFNLIVNLVR | 22d  | 28 |
| FBgn0000667 | 661.25  | 69 | 2 | GISQEQLNEFR        | 22d  | 28 |
| FBgn0000667 | 864.62  | 69 | 1 | ILAADKPYILPDEL     | 22d  | 28 |
| FBgn0000667 | 722.34  | 74 | 1 | NINEVENQILTR       | 22d  | 28 |
| FBgn0000667 | 708.65  | 43 | 1 | VGWEQLLTSINR       | 22d  | 28 |
| FBgn0000667 | 864.37  | 45 | 1 | ILAADKPYILPDEL     | 32d  | 28 |
| FBgn0000667 | 709     | 73 | 2 | VGWEQLLTSINR       | 32d  | 28 |
| FBgn0000667 | 661.58  | 62 | 3 | GISQEQLNEFR        | 36d  | 28 |
| FBgn0000667 | 722.47  | 69 | 2 | NINEVENQILTR       | 36d  | 28 |
| FBgn0000667 | 708.66  | 92 | 3 | VGWEQLLTSINR       | 36d  | 28 |
| FBgn0000667 | 1002.05 | 61 | 1 | ATLGEADKEFNLIVNLVR | 42d  | 28 |
| FBgn0000667 | 661.18  | 58 | 2 | GISQEQLNEFR        | 42d  | 28 |
| FBgn0000667 | 708.61  | 78 | 3 | VGWEQLLTSINR       | 42d  | 28 |
| FBgn0000667 | 661.25  | 59 | 2 | GISQEQLNEFR        | 46d  | 28 |
| FBgn0000667 | 708.63  | 98 | 3 | VGWEQLLTSINR       | 46d  | 28 |

|             |         |    |   |                             |      |    |
|-------------|---------|----|---|-----------------------------|------|----|
| FBgn0000667 | 661.32  | 62 | 2 | GISQEQLNFR                  | 50d  | 28 |
| FBgn0000667 | 608.8   | 63 | 1 | LASDLLEWIR                  | 50d  | 28 |
| FBgn0000667 | 709     | 73 | 2 | VGWEQLLTSINR                | 50d  | 28 |
| FBgn0000667 | 661.54  | 59 | 3 | GISQEQLNFR                  | 52d  | 28 |
| FBgn0000667 | 709.01  | 73 | 3 | VGWEQLLTSINR                | 52d  | 28 |
| FBgn0000667 | 749.06  | 74 | 2 | AFEWLLAETMR                 | 56d  | 28 |
| FBgn0000667 | 1002.14 | 77 | 2 | ATLGEADKEFNLIVNLVR          | 56d  | 28 |
| FBgn0000667 | 896.15  | 86 | 3 | DNPLENLNTAFDVAEK            | 56d  | 28 |
| FBgn0000667 | 907.68  | 68 | 2 | ESTDTDTAEQVIDSFR            | 56d  | 28 |
| FBgn0000667 | 609.04  | 73 | 2 | LASDLLEWIR                  | 56d  | 28 |
| FBgn0000667 | 709.13  | 75 | 3 | VGWEQLLTSINR                | 56d  | 28 |
| FBgn0000723 | 405.45  | 36 | 1 | YKEIQK                      | 122d | 18 |
| FBgn0001079 | 955.64  | 36 | 1 | WPSTLTCECRSFLQGLLEKDPGLR    | 122d | 18 |
| FBgn0001090 | 912.37  | 61 | 2 | GEEAIKPIAQSPSAEPK           | 2d   | 18 |
| FBgn0001090 | 1273.52 | 69 | 3 | KTEETAAPAGAPEPTAAVAPAAVPEAK | 2d   | 18 |
| FBgn0001090 | 949.86  | 69 | 3 | SIESPAAAAASPAAQAAQAK        | 2d   | 18 |
| FBgn0001090 | 820.74  | 68 | 2 | SSAPDVETAPAIPEKK            | 2d   | 18 |
| FBgn0001090 | 1026.35 | 48 | 2 | TLPEEAKPAQENAPVEAEK         | 2d   | 18 |
| FBgn0001090 | 556.72  | 39 | 2 | TNAPLAPAGATK                | 2d   | 18 |
| FBgn0001090 | 1208.97 | 71 | 3 | TVLPTAVEPAPLKPEAEKPAETK     | 2d   | 18 |
| FBgn0001090 | 800.86  | 52 | 1 | TEAEPTVEAQPOATK             | 42d  | 18 |
| FBgn0001090 | 666.88  | 36 | 1 | STETVAESAPVLK               | 62d  | 18 |
| FBgn0001090 | 1209.4  | 52 | 1 | TEETAAPAGAPEPTAAVAPAAVPEAK  | 62d  | 18 |
| FBgn0001090 | 1273.33 | 83 | 1 | KTEETAAPAGAPEPTAAVAPAAVPEAK | 82d  | 18 |
| FBgn0001090 | 949.84  | 61 | 1 | SIESPAAAAASPAAQAAQAK        | 82d  | 18 |
| FBgn0001090 | 667.01  | 56 | 1 | STETVAESAPVLK               | 82d  | 18 |
| FBgn0001090 | 1209.71 | 67 | 1 | TEETAAPAGAPEPTAAVAPAAVPEAK  | 82d  | 18 |
| FBgn0001090 | 556.69  | 36 | 1 | TNAPLAPAGATK                | 82d  | 18 |
| FBgn0001090 | 1179.96 | 69 | 1 | AAVPEQPDVNANPSPSTPAAEPAK    | 102d | 18 |
| FBgn0001090 | 1273.56 | 43 | 1 | KTEETAAPAGAPEPTAAVAPAAVPEAK | 102d | 18 |
| FBgn0001090 | 1179.89 | 49 | 2 | AAVPEQPDVNANPSPSTPAAEPAK    | 112d | 18 |
| FBgn0001090 | 1273.71 | 55 | 1 | KTEETAAPAGAPEPTAAVAPAAVPEAK | 112d | 18 |

|             |         |    |   |                             |      |    |
|-------------|---------|----|---|-----------------------------|------|----|
| FBgn0001090 | 1209.84 | 53 | 1 | TEETAAPAGAPEPTAAVAPAAVPEAK  | 112d | 18 |
| FBgn0001090 | 1180.08 | 62 | 1 | AAVPEQPDVNANPSPSTPAAEPAK    | 122d | 18 |
| FBgn0001090 | 1273.45 | 60 | 1 | KTEETAAPAGAPEPTAAVAPAAVPEAK | 122d | 18 |
| FBgn0001090 | 950.01  | 54 | 2 | SIESPAAAAASPAAQAAQAK        | 122d | 18 |
| FBgn0001090 | 1209.81 | 89 | 1 | TEETAAPAGAPEPTAAVAPAAVPEAK  | 122d | 18 |
| FBgn0001090 | 1180.2  | 55 | 1 | AAVPEQPDVNANPSPSTPAAEPAK    | 132d | 18 |
| FBgn0001090 | 1273.64 | 63 | 1 | KTEETAAPAGAPEPTAAVAPAAVPEAK | 142d | 18 |
| FBgn0001090 | 1180.19 | 55 | 3 | AAVPEQPDVNANPSPSTPAAEPAK    | 2d   | 28 |
| FBgn0001090 | 869.37  | 53 | 3 | AIEQAPEAPAANAIEVQK          | 2d   | 28 |
| FBgn0001090 | 562.61  | 44 | 3 | ETPVPEQPAR                  | 2d   | 28 |
| FBgn0001090 | 622.46  | 74 | 2 | IDEAPAAETVVK                | 2d   | 28 |
| FBgn0001090 | 1273.48 | 61 | 3 | KTEETAAPAGAPEPTAAVAPAAVPEAK | 2d   | 28 |
| FBgn0001090 | 698.73  | 65 | 3 | QVVDEVKQPQEK                | 2d   | 28 |
| FBgn0001090 | 715.14  | 72 | 1 | SDSNIQVIAPEKK               | 2d   | 28 |
| FBgn0001090 | 949.84  | 66 | 3 | SIESPAAAAASPAAQAAQAK        | 2d   | 28 |
| FBgn0001090 | 756.67  | 56 | 3 | SSAPDVETAPAIPEK             | 2d   | 28 |
| FBgn0001090 | 820.79  | 60 | 2 | SSAPDVETAPAIPEKK            | 2d   | 28 |
| FBgn0001090 | 667.06  | 59 | 3 | STETVAESAPVLK               | 2d   | 28 |
| FBgn0001090 | 800.81  | 79 | 3 | TEAEPTVEAQPOATK             | 2d   | 28 |
| FBgn0001090 | 1209.69 | 63 | 2 | TEETAAPAGAPEPTAAVAPAAVPEAK  | 2d   | 28 |
| FBgn0001090 | 1026.24 | 69 | 3 | TLPEEAKPAQENAPVEAEK         | 2d   | 28 |
| FBgn0001090 | 556.82  | 40 | 2 | TNAPLAPAGATK                | 2d   | 28 |
| FBgn0001090 | 1208.92 | 49 | 1 | TVLPTAVEPAPLKPEAEKPAETK     | 2d   | 28 |
| FBgn0001090 | 1180.01 | 49 | 2 | AAVPEQPDVNANPSPSTPAAEPAK    | 12d  | 28 |
| FBgn0001090 | 869.49  | 52 | 3 | AIEQAPEAPAANAIEVQK          | 12d  | 28 |
| FBgn0001090 | 1273.54 | 77 | 3 | KTEETAAPAGAPEPTAAVAPAAVPEAK | 12d  | 28 |
| FBgn0001090 | 642.75  | 48 | 2 | SGEAPKPVDDQK                | 12d  | 28 |
| FBgn0001090 | 949.66  | 79 | 3 | SIESPAAAAASPAAQAAQAK        | 12d  | 28 |
| FBgn0001090 | 666.71  | 57 | 3 | STETVAESAPVLK               | 12d  | 28 |
| FBgn0001090 | 800.97  | 59 | 2 | TEAEPTVEAQPOATK             | 12d  | 28 |
| FBgn0001090 | 1026.41 | 71 | 3 | TLPEEAKPAQENAPVEAEK         | 12d  | 28 |
| FBgn0001090 | 1208.99 | 46 | 3 | TVLPTAVEPAPLKPEAEKPAETK     | 12d  | 28 |

|             |         |    |   |                             |     |    |
|-------------|---------|----|---|-----------------------------|-----|----|
| FBgn0001090 | 666.89  | 60 | 3 | STETVAESAPVLK               | 32d | 28 |
| FBgn0001090 | 800.7   | 63 | 2 | TEAEPTVEAQPQATK             | 32d | 28 |
| FBgn0001090 | 1209.46 | 67 | 1 | TEETAAPAGAPEPTAAVAPAAVPEAK  | 32d | 28 |
| FBgn0001090 | 806.55  | 41 | 1 | TVLPTAVEPAPLKPEAEKPAETK     | 32d | 28 |
| FBgn0001090 | 1273.43 | 40 | 1 | KTEETAAPAGAPEPTAAVAPAAVPEAK | 36d | 28 |
| FBgn0001090 | 666.64  | 78 | 3 | STETVAESAPVLK               | 36d | 28 |
| FBgn0001090 | 1209.33 | 67 | 1 | TEETAAPAGAPEPTAAVAPAAVPEAK  | 36d | 28 |
| FBgn0001090 | 949.81  | 58 | 3 | SIESPAAAAASPAAQAAQAK        | 42d | 28 |
| FBgn0001090 | 666.64  | 55 | 2 | STETVAESAPVLK               | 42d | 28 |
| FBgn0001090 | 1209.51 | 66 | 1 | TEETAAPAGAPEPTAAVAPAAVPEAK  | 42d | 28 |
| FBgn0001090 | 949.77  | 64 | 2 | SIESPAAAAASPAAQAAQAK        | 50d | 28 |
| FBgn0001090 | 666.82  | 57 | 2 | STETVAESAPVLK               | 50d | 28 |
| FBgn0001090 | 1209.36 | 71 | 1 | TEETAAPAGAPEPTAAVAPAAVPEAK  | 50d | 28 |
| FBgn0001090 | 1209.03 | 44 | 1 | TVLPTAVEPAPLKPEAEKPAETK     | 50d | 28 |
| FBgn0001090 | 1273.5  | 53 | 1 | KTEETAAPAGAPEPTAAVAPAAVPEAK | 52d | 28 |
| FBgn0001090 | 950.01  | 71 | 3 | SIESPAAAAASPAAQAAQAK        | 52d | 28 |
| FBgn0001090 | 666.85  | 65 | 1 | STETVAESAPVLK               | 52d | 28 |
| FBgn0001090 | 1209.83 | 84 | 3 | TEETAAPAGAPEPTAAVAPAAVPEAK  | 52d | 28 |
| FBgn0001090 | 562.56  | 38 | 1 | ETPVPEQPAR                  | 56d | 28 |
| FBgn0001090 | 642.83  | 47 | 1 | SGEAPKPVDDQQK               | 56d | 28 |
| FBgn0001090 | 949.83  | 68 | 1 | SIESPAAAAASPAAQAAQAK        | 56d | 28 |
| FBgn0001090 | 800.84  | 45 | 1 | TEAEPTVEAQPQATK             | 56d | 28 |
| FBgn0001091 | 1428.54 | 65 | 1 | DPANINWASAGAEYVVESTGVFTTIDK | 2d  | 18 |
| FBgn0001091 | 677.89  | 45 | 1 | GAAQNIIPAAATGAAK            | 2d  | 18 |
| FBgn0001091 | 978.57  | 40 | 1 | GILGYTDEEVVSTDFLSDTHSSVFDAK | 22d | 18 |
| FBgn0001091 | 882.57  | 64 | 3 | LISWYDNEFGYSNR              | 22d | 18 |
| FBgn0001091 | 1317.35 | 69 | 5 | VINDNFEIVEGLMTTVHATTATQK    | 22d | 18 |
| FBgn0001091 | 883.02  | 81 | 2 | LISWYDNEFGYSNR              | 42d | 18 |
| FBgn0001091 | 749.15  | 84 | 2 | VPTPNVSVVDLTVR              | 42d | 18 |
| FBgn0001091 | 1467.35 | 52 | 1 | GILGYTDEEVVSTDFLSDTHSSVFDAK | 62d | 18 |
| FBgn0001091 | 774.43  | 84 | 1 | GTVAEEGGFLVVNGQK            | 62d | 18 |
| FBgn0001091 | 882.73  | 77 | 2 | LISWYDNEFGYSNR              | 62d | 18 |

|             |         |     |   |                             |      |    |
|-------------|---------|-----|---|-----------------------------|------|----|
| FBgn0001091 | 351.2   | 34  | 1 | VIDLIK                      | 62d  | 18 |
| FBgn0001091 | 1317.37 | 39  | 1 | VINDNFEIVEGLMTTVHATTATQK    | 62d  | 18 |
| FBgn0001091 | 677.84  | 52  | 2 | GAAQNIIPAAATGAAK            | 82d  | 18 |
| FBgn0001091 | 417.63  | 51  | 1 | IGINGFGR                    | 82d  | 18 |
| FBgn0001091 | 878.14  | 106 | 5 | VINDNFEIVEGLMTTVHATTATQK    | 82d  | 18 |
| FBgn0001091 | 978.26  | 54  | 3 | GILGYTDEEVVSTDFLSDTHSSVFDAK | 102d | 18 |
| FBgn0001091 | 883.14  | 76  | 2 | LISWYDNEFGYSNR              | 102d | 18 |
| FBgn0001091 | 1317.35 | 106 | 2 | VINDNFEIVEGLMTTVHATTATQK    | 102d | 18 |
| FBgn0001091 | 410.94  | 44  | 7 | FDSTHGR                     | 112d | 18 |
| FBgn0001091 | 978.51  | 48  | 1 | GILGYTDEEVVSTDFLSDTHSSVFDAK | 112d | 18 |
| FBgn0001091 | 882.97  | 86  | 3 | LISWYDNEFGYSNR              | 112d | 18 |
| FBgn0001091 | 878.13  | 72  | 7 | VINDNFEIVEGLMTTVHATTATQK    | 112d | 18 |
| FBgn0001091 | 748.49  | 74  | 2 | VTPNVSVDLTVR                | 112d | 18 |
| FBgn0001091 | 978.22  | 35  | 1 | GILGYTDEEVVSTDFLSDTHSSVFDAK | 122d | 18 |
| FBgn0001091 | 882.91  | 86  | 3 | LISWYDNEFGYSNR              | 122d | 18 |
| FBgn0001091 | 878.57  | 101 | 3 | VINDNFEIVEGLMTTVHATTATQK    | 122d | 18 |
| FBgn0001091 | 882.66  | 76  | 3 | LISWYDNEFGYSNR              | 132d | 18 |
| FBgn0001091 | 1317.26 | 70  | 6 | VINDNFEIVEGLMTTVHATTATQK    | 132d | 18 |
| FBgn0001091 | 774.52  | 94  | 2 | GTVA AEGGLV VNGQK           | 142d | 18 |
| FBgn0001091 | 882.69  | 72  | 3 | LISWYDNEFGYSNR              | 142d | 18 |
| FBgn0001091 | 1317.23 | 90  | 3 | VINDNFEIVEGLMTTVHATTATQK    | 142d | 18 |
| FBgn0001091 | 677.84  | 36  | 2 | GAAQNIIPAAATGAAK            | 2d   | 28 |
| FBgn0001091 | 978.56  | 51  | 1 | GILGYTDEEVVSTDFLSDTHSSVFDAK | 2d   | 28 |
| FBgn0001091 | 978.62  | 52  | 1 | GILGYTDEEVVSTDFLSDTHSSVFDAK | 12d  | 28 |
| FBgn0001091 | 883.11  | 94  | 3 | LISWYDNEFGYSNR              | 12d  | 28 |
| FBgn0001091 | 1317.18 | 100 | 5 | VINDNFEIVEGLMTTVHATTATQK    | 12d  | 28 |
| FBgn0001091 | 882.9   | 77  | 3 | LISWYDNEFGYSNR              | 22d  | 28 |
| FBgn0001091 | 748.83  | 83  | 2 | VTPNVSVDLTVR                | 22d  | 28 |
| FBgn0001091 | 882.96  | 82  | 3 | LISWYDNEFGYSNR              | 32d  | 28 |
| FBgn0001091 | 1316.96 | 73  | 4 | VINDNFEIVEGLMTTVHATTATQK    | 32d  | 28 |
| FBgn0001091 | 978.56  | 64  | 3 | GILGYTDEEVVSTDFLSDTHSSVFDAK | 36d  | 28 |
| FBgn0001091 | 883.09  | 69  | 3 | LISWYDNEFGYSNR              | 36d  | 28 |



|             |         |     |   |                              |      |    |
|-------------|---------|-----|---|------------------------------|------|----|
| FBgn0001091 | 1317.03 | 83  | 6 | VINDNFEIVEGLMTTVHATTATQK     | 36d  | 28 |
| FBgn0001091 | 410.82  | 47  | 2 | FDSTHGR                      | 42d  | 28 |
| FBgn0001091 | 677.83  | 38  | 2 | GAAQNIIPAAATGAAK             | 42d  | 28 |
| FBgn0001091 | 883.01  | 87  | 3 | LISWYDNEFGYSNR               | 42d  | 28 |
| FBgn0001091 | 978.51  | 44  | 2 | GILGYTDEEVVSTDFLSDTHSSVFDK   | 46d  | 28 |
| FBgn0001091 | 774.32  | 80  | 1 | GTVAEEGGFLVVNGQK             | 46d  | 28 |
| FBgn0001091 | 883.06  | 107 | 3 | LISWYDNEFGYSNR               | 46d  | 28 |
| FBgn0001091 | 1317.36 | 95  | 4 | VINDNFEIVEGLMTTVHATTATQK     | 46d  | 28 |
| FBgn0001091 | 748.89  | 79  | 3 | VPTPNVSVVDLTVR               | 46d  | 28 |
| FBgn0001091 | 978.22  | 54  | 2 | GILGYTDEEVVSTDFLSDTHSSVFDK   | 50d  | 28 |
| FBgn0001091 | 882.97  | 72  | 3 | LISWYDNEFGYSNR               | 50d  | 28 |
| FBgn0001091 | 1317.08 | 80  | 8 | VINDNFEIVEGLMTTVHATTATQK     | 50d  | 28 |
| FBgn0001091 | 678.04  | 43  | 1 | GAAQNIIPAAATGAAK             | 52d  | 28 |
| FBgn0001091 | 677.69  | 47  | 3 | GAAQNIIPAAATGAAK             | 56d  | 28 |
| FBgn0001091 | 882.95  | 77  | 3 | LISWYDNEFGYSNR               | 56d  | 28 |
| FBgn0001091 | 1317.11 | 96  | 5 | VINDNFEIVEGLMTTVHATTATQK     | 56d  | 28 |
| FBgn0001092 | 1435.72 | 75  | 3 | DPANINWASAGA EYIVESTGVFTTIDK | 2d   | 18 |
| FBgn0001092 | 685.9   | 47  | 3 | GAAQNIIPASTGAAK              | 2d   | 18 |
| FBgn0001092 | 685.62  | 37  | 2 | GAAQNIIPASTGAAK              | 22d  | 18 |
| FBgn0001092 | 685.89  | 38  | 1 | GAAQNIIPASTGAAK              | 62d  | 18 |
| FBgn0001092 | 1435.45 | 62  | 1 | DPANINWASAGA EYIVESTGVFTTIDK | 82d  | 18 |
| FBgn0001092 | 685.96  | 59  | 1 | GAAQNIIPASTGAAK              | 82d  | 18 |
| FBgn0001092 | 685.86  | 34  | 1 | GAAQNIIPASTGAAK              | 102d | 18 |
| FBgn0001092 | 749.11  | 83  | 3 | VPTPNVSVVDLTVR               | 102d | 18 |
| FBgn0001092 | 514.48  | 45  | 1 | VQEAANGPLK                   | 122d | 18 |
| FBgn0001092 | 774.61  | 45  | 1 | GTVAEEGGFLVVNGQK             | 132d | 18 |
| FBgn0001092 | 748.96  | 55  | 1 | VPTPNVSVVDLTVR               | 132d | 18 |
| FBgn0001092 | 514.47  | 53  | 2 | VQEAANGPLK                   | 132d | 18 |
| FBgn0001092 | 1435.87 | 56  | 1 | DPANINWASAGA EYIVESTGVFTTIDK | 2d   | 28 |
| FBgn0001092 | 686.09  | 56  | 3 | GAAQNIIPASTGAAK              | 2d   | 28 |
| FBgn0001092 | 417.57  | 47  | 1 | IGINGFGR                     | 2d   | 28 |
| FBgn0001092 | 514.39  | 48  | 2 | VQEAANGPLK                   | 2d   | 28 |

|             |         |     |   |                              |     |    |
|-------------|---------|-----|---|------------------------------|-----|----|
| FBgn0001092 | 1435.89 | 78  | 1 | DPANINWASAGA EYIVESTGVFTTIDK | 12d | 28 |
| FBgn0001092 | 685.77  | 35  | 1 | GAAQNIIPASTGAAK              | 12d | 28 |
| FBgn0001092 | 685.76  | 44  | 3 | GAAQNIIPASTGAAK              | 32d | 28 |
| FBgn0001092 | 685.62  | 35  | 1 | GAAQNIIPASTGAAK              | 36d | 28 |
| FBgn0001092 | 686.03  | 42  | 3 | GAAQNIIPASTGAAK              | 42d | 28 |
| FBgn0001092 | 685.73  | 54  | 2 | GAAQNIIPASTGAAK              | 50d | 28 |
| FBgn0001092 | 774.42  | 102 | 2 | GTVA AEGGFLVVNGQK            | 50d | 28 |
| FBgn0001092 | 748.86  | 93  | 3 | VTPNVSVDLTVR                 | 50d | 28 |
| FBgn0001092 | 685.96  | 62  | 2 | GAAQNIIPASTGAAK              | 52d | 28 |
| FBgn0001092 | 685.81  | 37  | 1 | GAAQNIIPASTGAAK              | 56d | 28 |
| FBgn0001098 | 695.66  | 61  | 2 | DAGNYEMITGYR                 | 2d  | 18 |
| FBgn0001098 | 768.68  | 52  | 3 | DIVHSGLDYTMER                | 2d  | 18 |
| FBgn0001098 | 967.51  | 58  | 3 | ESNYHLLSVQESLER              | 2d  | 18 |
| FBgn0001098 | 937.2   | 35  | 1 | GFIGPGVDVPAPDMGTGER          | 2d  | 18 |
| FBgn0001098 | 1513.12 | 84  | 2 | GVFHGLENFINEANYMSQIGTTPGWGGK | 2d  | 18 |
| FBgn0001098 | 770.96  | 88  | 3 | IIAEAANGPTTPAADK             | 2d  | 18 |
| FBgn0001098 | 617.15  | 40  | 3 | IPVTPSESFQK                  | 2d  | 18 |
| FBgn0001098 | 1000.9  | 38  | 1 | KGFIGPGVDVPAPDMGTGER         | 2d  | 18 |
| FBgn0001098 | 695.57  | 56  | 2 | DAGNYEMITGYR                 | 22d | 18 |
| FBgn0001098 | 768.69  | 44  | 3 | DIVHSGLDYTMER                | 22d | 18 |
| FBgn0001098 | 967.64  | 51  | 3 | ESNYHLLSVQESLER              | 22d | 18 |
| FBgn0001098 | 937.08  | 48  | 3 | GFIGPGVDVPAPDMGTGER          | 22d | 18 |
| FBgn0001098 | 771.09  | 81  | 3 | IIAEAANGPTTPAADK             | 22d | 18 |
| FBgn0001098 | 617.24  | 40  | 1 | IPVTPSESFQK                  | 22d | 18 |
| FBgn0001098 | 874.51  | 65  | 1 | TFIVQGFQGNVGLHTTR            | 22d | 18 |
| FBgn0001098 | 768.82  | 46  | 2 | DIVHSGLDYTMER                | 42d | 18 |
| FBgn0001098 | 967.42  | 64  | 2 | ESNYHLLSVQESLER              | 42d | 18 |
| FBgn0001098 | 617.3   | 36  | 2 | IPVTPSESFQK                  | 42d | 18 |
| FBgn0001098 | 874.53  | 96  | 3 | TFIVQGFQGNVGLHTTR            | 42d | 18 |
| FBgn0001098 | 502.87  | 43  | 1 | VITSENANR                    | 42d | 18 |
| FBgn0001098 | 967.14  | 45  | 1 | ESNYHLLSVQESLER              | 62d | 18 |
| FBgn0001098 | 770.69  | 65  | 4 | IIAEAANGPTTPAADK             | 62d | 18 |

|             |         |    |   |                              |      |    |
|-------------|---------|----|---|------------------------------|------|----|
| FBgn0001098 | 766.75  | 57 | 1 | IINDESVQESLER                | 62d  | 18 |
| FBgn0001098 | 617.38  | 46 | 2 | IPVTPSESFQK                  | 62d  | 18 |
| FBgn0001098 | 874.61  | 89 | 1 | TFIVQGFQNVGLHTTR             | 62d  | 18 |
| FBgn0001098 | 483     | 50 | 1 | YNLGLDLR                     | 62d  | 18 |
| FBgn0001098 | 769.02  | 52 | 2 | DIVHSGLDYTMER                | 82d  | 18 |
| FBgn0001098 | 967.61  | 55 | 2 | ESNYHLLESVQESLER             | 82d  | 18 |
| FBgn0001098 | 771.14  | 97 | 2 | IIAEAANGPTTPAADK             | 82d  | 18 |
| FBgn0001098 | 617.33  | 42 | 1 | IPVTPSESFQK                  | 82d  | 18 |
| FBgn0001098 | 482.71  | 63 | 1 | YNLGLDLR                     | 82d  | 18 |
| FBgn0001098 | 768.95  | 48 | 1 | DIVHSGLDYTMER                | 102d | 18 |
| FBgn0001098 | 967.37  | 57 | 3 | ESNYHLLESVQESLER             | 102d | 18 |
| FBgn0001098 | 937.13  | 61 | 2 | GFIGPGVDVPAPDMGTGER          | 102d | 18 |
| FBgn0001098 | 770.68  | 69 | 1 | IIAEAANGPTTPAADK             | 102d | 18 |
| FBgn0001098 | 502.85  | 52 | 2 | VITSENANR                    | 102d | 18 |
| FBgn0001098 | 768.99  | 39 | 1 | DIVHSGLDYTMER                | 112d | 18 |
| FBgn0001098 | 936.75  | 46 | 2 | GFIGPGVDVPAPDMGTGER          | 112d | 18 |
| FBgn0001098 | 771.14  | 36 | 1 | IIAEAANGPTTPAADK             | 112d | 18 |
| FBgn0001098 | 502.87  | 49 | 3 | VITSENANR                    | 112d | 18 |
| FBgn0001098 | 658.41  | 43 | 1 | EMSWIADTYAK                  | 122d | 18 |
| FBgn0001098 | 1513.19 | 60 | 2 | GVFHGLENFINEANYMSQIGTTPGWGGK | 122d | 18 |
| FBgn0001098 | 770.76  | 56 | 1 | IIAEAANGPTTPAADK             | 122d | 18 |
| FBgn0001098 | 617.22  | 34 | 2 | IPVTPSESFQK                  | 122d | 18 |
| FBgn0001098 | 768.84  | 48 | 3 | DIVHSGLDYTMER                | 132d | 18 |
| FBgn0001098 | 967.52  | 56 | 1 | ESNYHLLESVQESLER             | 132d | 18 |
| FBgn0001098 | 770.92  | 86 | 2 | IIAEAANGPTTPAADK             | 132d | 18 |
| FBgn0001098 | 766.87  | 85 | 1 | IINDESVQESLER                | 132d | 18 |
| FBgn0001098 | 617.54  | 47 | 3 | IPVTPSESFQK                  | 132d | 18 |
| FBgn0001098 | 768.88  | 46 | 2 | DIVHSGLDYTMER                | 142d | 18 |
| FBgn0001098 | 658.36  | 34 | 1 | EMSWIADTYAK                  | 142d | 18 |
| FBgn0001098 | 967.68  | 47 | 1 | ESNYHLLESVQESLER             | 142d | 18 |
| FBgn0001098 | 771.04  | 71 | 2 | IIAEAANGPTTPAADK             | 142d | 18 |
| FBgn0001098 | 617.44  | 40 | 1 | IPVTPSESFQK                  | 142d | 18 |

|             |         |    |   |                              |      |    |
|-------------|---------|----|---|------------------------------|------|----|
| FBgn0001098 | 1001.14 | 54 | 1 | KGFIGPGVDVPAPDMGTGER         | 142d | 18 |
| FBgn0001098 | 502.85  | 44 | 2 | VITSENANR                    | 142d | 18 |
| FBgn0001098 | 695.87  | 53 | 2 | DAGNYEMITGYR                 | 2d   | 28 |
| FBgn0001098 | 768.92  | 48 | 3 | DIVHSGLDYTMER                | 2d   | 28 |
| FBgn0001098 | 937.08  | 57 | 2 | GFIGPGVDVPAPDMGTGER          | 2d   | 28 |
| FBgn0001098 | 770.76  | 76 | 2 | IIAEAANGPTTPAADK             | 2d   | 28 |
| FBgn0001098 | 766.93  | 81 | 1 | IINDESVQESLER                | 2d   | 28 |
| FBgn0001098 | 617.18  | 49 | 7 | IPVTPSESFQK                  | 2d   | 28 |
| FBgn0001098 | 1000.98 | 40 | 1 | KGFIGPGVDVPAPDMGTGER         | 2d   | 28 |
| FBgn0001098 | 874.55  | 65 | 2 | TFIVQGFGNVGLHTTR             | 2d   | 28 |
| FBgn0001098 | 502.63  | 50 | 3 | VITSENANR                    | 2d   | 28 |
| FBgn0001098 | 695.9   | 61 | 1 | DAGNYEMITGYR                 | 12d  | 28 |
| FBgn0001098 | 768.79  | 55 | 3 | DIVHSGLDYTMER                | 12d  | 28 |
| FBgn0001098 | 967.44  | 59 | 2 | ESNYHLLESVQESLER             | 12d  | 28 |
| FBgn0001098 | 937.02  | 39 | 2 | GFIGPGVDVPAPDMGTGER          | 12d  | 28 |
| FBgn0001098 | 1513.17 | 58 | 3 | GVFHGLENFINEANYMSQIGTTPGWGGK | 12d  | 28 |
| FBgn0001098 | 770.83  | 80 | 1 | IIAEAANGPTTPAADK             | 12d  | 28 |
| FBgn0001098 | 617.28  | 52 | 3 | IPVTPSESFQK                  | 12d  | 28 |
| FBgn0001098 | 1001.24 | 63 | 2 | KGFIGPGVDVPAPDMGTGER         | 12d  | 28 |
| FBgn0001098 | 874.64  | 36 | 1 | TFIVQGFGNVGLHTTR             | 12d  | 28 |
| FBgn0001098 | 482.95  | 51 | 3 | YNLGLDLR                     | 12d  | 28 |
| FBgn0001098 | 695.74  | 71 | 3 | DAGNYEMITGYR                 | 22d  | 28 |
| FBgn0001098 | 768.82  | 47 | 2 | DIVHSGLDYTMER                | 22d  | 28 |
| FBgn0001098 | 967.7   | 63 | 2 | ESNYHLLESVQESLER             | 22d  | 28 |
| FBgn0001098 | 617.33  | 43 | 2 | IPVTPSESFQK                  | 22d  | 28 |
| FBgn0001098 | 874.65  | 81 | 1 | TFIVQGFGNVGLHTTR             | 22d  | 28 |
| FBgn0001098 | 695.98  | 73 | 3 | DAGNYEMITGYR                 | 32d  | 28 |
| FBgn0001098 | 768.75  | 45 | 3 | DIVHSGLDYTMER                | 32d  | 28 |
| FBgn0001098 | 967.38  | 61 | 2 | ESNYHLLESVQESLER             | 32d  | 28 |
| FBgn0001098 | 936.93  | 49 | 2 | GFIGPGVDVPAPDMGTGER          | 32d  | 28 |
| FBgn0001098 | 770.84  | 82 | 3 | IIAEAANGPTTPAADK             | 32d  | 28 |
| FBgn0001098 | 617.42  | 51 | 3 | IPVTPSESFQK                  | 32d  | 28 |

|             |         |     |   |                      |     |    |
|-------------|---------|-----|---|----------------------|-----|----|
| FBgn0001098 | 874.46  | 90  | 1 | TFIVQGFQNVGLHTTR     | 32d | 28 |
| FBgn0001098 | 695.86  | 46  | 1 | DAGNYEMITGYR         | 36d | 28 |
| FBgn0001098 | 768.78  | 55  | 3 | DIVHSGLDYTMER        | 36d | 28 |
| FBgn0001098 | 967.39  | 50  | 1 | ESNYHLLESVQESLER     | 36d | 28 |
| FBgn0001098 | 937.01  | 49  | 1 | GFIGPGVDVPAPDMGTGER  | 36d | 28 |
| FBgn0001098 | 770.78  | 79  | 2 | IIEAANGPTTAAADK      | 36d | 28 |
| FBgn0001098 | 617.34  | 45  | 3 | IPVTPSESFQK          | 36d | 28 |
| FBgn0001098 | 695.82  | 66  | 3 | DAGNYEMITGYR         | 42d | 28 |
| FBgn0001098 | 768.85  | 47  | 2 | DIVHSGLDYTMER        | 42d | 28 |
| FBgn0001098 | 658.09  | 38  | 1 | EMSWIADTYAK          | 42d | 28 |
| FBgn0001098 | 967.47  | 53  | 2 | ESNYHLLESVQESLER     | 42d | 28 |
| FBgn0001098 | 936.79  | 44  | 1 | GFIGPGVDVPAPDMGTGER  | 42d | 28 |
| FBgn0001098 | 770.72  | 79  | 3 | IIEAANGPTTAAADK      | 42d | 28 |
| FBgn0001098 | 617.22  | 45  | 4 | IPVTPSESFQK          | 42d | 28 |
| FBgn0001098 | 1000.72 | 77  | 2 | KGFIGPGVDVPAPDMGTGER | 42d | 28 |
| FBgn0001098 | 874.39  | 104 | 2 | TFIVQGFQNVGLHTTR     | 42d | 28 |
| FBgn0001098 | 502.73  | 50  | 3 | VITSENANR            | 42d | 28 |
| FBgn0001098 | 695.76  | 78  | 2 | DAGNYEMITGYR         | 46d | 28 |
| FBgn0001098 | 768.99  | 45  | 2 | DIVHSGLDYTMER        | 46d | 28 |
| FBgn0001098 | 967.7   | 52  | 1 | ESNYHLLESVQESLER     | 46d | 28 |
| FBgn0001098 | 617.2   | 52  | 3 | IPVTPSESFQK          | 46d | 28 |
| FBgn0001098 | 874.4   | 83  | 1 | TFIVQGFQNVGLHTTR     | 46d | 28 |
| FBgn0001098 | 502.81  | 42  | 1 | VITSENANR            | 46d | 28 |
| FBgn0001098 | 696.01  | 71  | 1 | DAGNYEMITGYR         | 50d | 28 |
| FBgn0001098 | 768.98  | 59  | 3 | DIVHSGLDYTMER        | 50d | 28 |
| FBgn0001098 | 967.55  | 61  | 3 | ESNYHLLESVQESLER     | 50d | 28 |
| FBgn0001098 | 936.56  | 48  | 1 | GFIGPGVDVPAPDMGTGER  | 50d | 28 |
| FBgn0001098 | 770.91  | 82  | 3 | IIEAANGPTTAAADK      | 50d | 28 |
| FBgn0001098 | 617.23  | 47  | 3 | IPVTPSESFQK          | 50d | 28 |
| FBgn0001098 | 874.49  | 93  | 2 | TFIVQGFQNVGLHTTR     | 50d | 28 |
| FBgn0001098 | 502.85  | 51  | 1 | VITSENANR            | 50d | 28 |
| FBgn0001098 | 695.97  | 60  | 2 | DAGNYEMITGYR         | 52d | 28 |

|             |         |    |   |                               |      |    |
|-------------|---------|----|---|-------------------------------|------|----|
| FBgn0001098 | 768.7   | 46 | 1 | DIVHSGLDYTMER                 | 52d  | 28 |
| FBgn0001098 | 967.55  | 55 | 2 | ESNYHLLSVQESLER               | 52d  | 28 |
| FBgn0001098 | 937.17  | 56 | 1 | GFIGPGVDVPAPDMGTGER           | 52d  | 28 |
| FBgn0001098 | 770.99  | 75 | 1 | IIAEAANGPTTPAADK              | 52d  | 28 |
| FBgn0001098 | 617.43  | 46 | 2 | IPVTPSESFQK                   | 52d  | 28 |
| FBgn0001098 | 502.64  | 39 | 1 | VITSENANR                     | 52d  | 28 |
| FBgn0001098 | 967.58  | 55 | 2 | ESNYHLLSVQESLER               | 56d  | 28 |
| FBgn0001098 | 771.1   | 75 | 3 | IIAEAANGPTTPAADK              | 56d  | 28 |
| FBgn0001098 | 617.42  | 43 | 3 | IPVTPSESFQK                   | 56d  | 28 |
| FBgn0001098 | 502.71  | 47 | 1 | VITSENANR                     | 56d  | 28 |
| FBgn0001098 | 482.89  | 66 | 1 | YNLGLDLR                      | 56d  | 28 |
| FBgn0001105 | 657.79  | 73 | 3 | LIVWDSHTTNK                   | 2d   | 18 |
| FBgn0001105 | 657.95  | 51 | 1 | LIVWDSHTTNK                   | 22d  | 18 |
| FBgn0001105 | 657.76  | 51 | 1 | LIVWDSHTTNK                   | 62d  | 18 |
| FBgn0001105 | 657.63  | 36 | 1 | LIVWDSHTTNK                   | 82d  | 18 |
| FBgn0001105 | 657.57  | 62 | 3 | LIVWDSHTTNK                   | 2d   | 28 |
| FBgn0001105 | 657.73  | 56 | 2 | LIVWDSHTTNK                   | 12d  | 28 |
| FBgn0001105 | 657.83  | 55 | 1 | LIVWDSHTTNK                   | 32d  | 28 |
| FBgn0001105 | 657.78  | 50 | 2 | LIVWDSHTTNK                   | 36d  | 28 |
| FBgn0001105 | 657.92  | 37 | 1 | LIVWDSHTTNK                   | 46d  | 28 |
| FBgn0001105 | 657.72  | 56 | 3 | LIVWDSHTTNK                   | 50d  | 28 |
| FBgn0001114 | 1056.28 | 73 | 2 | LPTSQLVAAFEQLLLQNEHLGLTQLGGFK | 2d   | 18 |
| FBgn0001114 | 840.65  | 43 | 1 | YAQPQEAVVQAPEVGQILGISGHK      | 132d | 18 |
| FBgn0001122 | 747.76  | 75 | 3 | IIHESGFTAEDFK                 | 2d   | 18 |
| FBgn0001122 | 529.3   | 40 | 1 | YFLDDLDR                      | 2d   | 18 |
| FBgn0001122 | 747.88  | 55 | 3 | IIHESGFTAEDFK                 | 22d  | 18 |
| FBgn0001122 | 747.65  | 63 | 3 | IIHESGFTAEDFK                 | 2d   | 28 |
| FBgn0001122 | 925.49  | 65 | 2 | MHDTEPFSEELLAAMK              | 2d   | 28 |
| FBgn0001122 | 747.75  | 58 | 2 | IIHESGFTAEDFK                 | 12d  | 28 |
| FBgn0001122 | 747.71  | 58 | 1 | IIHESGFTAEDFK                 | 32d  | 28 |
| FBgn0001122 | 747.68  | 58 | 1 | IIHESGFTAEDFK                 | 36d  | 28 |
| FBgn0001122 | 747.82  | 66 | 2 | IIHESGFTAEDFK                 | 42d  | 28 |

|             |        |    |   |                  |      |    |
|-------------|--------|----|---|------------------|------|----|
| FBgn0001122 | 747.79 | 58 | 2 | IIHESGFTAEDFK    | 46d  | 28 |
| FBgn0001122 | 747.97 | 67 | 3 | IIHESGFTAEDFK    | 50d  | 28 |
| FBgn0001122 | 748.03 | 54 | 3 | IIHESGFTAEDFK    | 52d  | 28 |
| FBgn0001128 | 777.08 | 87 | 2 | AEGGGIDLISHIITR  | 2d   | 18 |
| FBgn0001128 | 794.64 | 48 | 2 | IVGANAAALPEFEER  | 2d   | 18 |
| FBgn0001128 | 816.95 | 62 | 2 | LPPNVVAVPDLVEAAK | 2d   | 18 |
| FBgn0001128 | 770.64 | 65 | 3 | LTEIINETHENVK    | 2d   | 18 |
| FBgn0001128 | 776.88 | 45 | 1 | AEGGGIDLISHIITR  | 22d  | 18 |
| FBgn0001128 | 580.16 | 53 | 2 | FVDVFYPGSK       | 22d  | 18 |
| FBgn0001128 | 794.37 | 39 | 1 | IVGANAAALPEFEER  | 22d  | 18 |
| FBgn0001128 | 816.87 | 62 | 1 | LPPNVVAVPDLVEAAK | 22d  | 18 |
| FBgn0001128 | 770.67 | 65 | 2 | LTEIINETHENVK    | 22d  | 18 |
| FBgn0001128 | 777.11 | 75 | 3 | AEGGGIDLISHIITR  | 42d  | 18 |
| FBgn0001128 | 580.22 | 37 | 2 | FVDVFYPGSK       | 42d  | 18 |
| FBgn0001128 | 539.64 | 49 | 1 | GLEDKFPLFTAIHK   | 42d  | 18 |
| FBgn0001128 | 482.14 | 45 | 3 | LGLMEMIR         | 42d  | 18 |
| FBgn0001128 | 817.18 | 65 | 3 | LPPNVVAVPDLVEAAK | 42d  | 18 |
| FBgn0001128 | 580.24 | 39 | 2 | FVDVFYPGSK       | 62d  | 18 |
| FBgn0001128 | 816.64 | 64 | 2 | LPPNVVAVPDLVEAAK | 62d  | 18 |
| FBgn0001128 | 770.85 | 73 | 2 | LTEIINETHENVK    | 62d  | 18 |
| FBgn0001128 | 776.8  | 57 | 1 | AEGGGIDLISHIITR  | 82d  | 18 |
| FBgn0001128 | 575.02 | 37 | 2 | DLFQANHFR        | 82d  | 18 |
| FBgn0001128 | 817.15 | 43 | 1 | LPPNVVAVPDLVEAAK | 82d  | 18 |
| FBgn0001128 | 770.92 | 72 | 3 | LTEIINETHENVK    | 82d  | 18 |
| FBgn0001128 | 776.95 | 76 | 1 | AEGGGIDLISHIITR  | 102d | 18 |
| FBgn0001128 | 794.42 | 43 | 2 | IVGANAAALPEFEER  | 102d | 18 |
| FBgn0001128 | 817.18 | 53 | 2 | LPPNVVAVPDLVEAAK | 102d | 18 |
| FBgn0001128 | 845.96 | 38 | 1 | LQGPPTAEEVNYMLK  | 102d | 18 |
| FBgn0001128 | 579.85 | 49 | 2 | FVDVFYPGSK       | 112d | 18 |
| FBgn0001128 | 794.44 | 45 | 1 | IVGANAAALPEFEER  | 112d | 18 |
| FBgn0001128 | 817.18 | 57 | 2 | LPPNVVAVPDLVEAAK | 112d | 18 |
| FBgn0001128 | 845.47 | 42 | 2 | LQGPPTAEEVNYMLK  | 112d | 18 |

|             |        |    |   |                  |      |    |
|-------------|--------|----|---|------------------|------|----|
| FBgn0001128 | 776.81 | 70 | 2 | AEGGGIDLISHIITR  | 122d | 18 |
| FBgn0001128 | 794.64 | 47 | 2 | IVGANAAALPEFEER  | 122d | 18 |
| FBgn0001128 | 816.2  | 42 | 2 | LPPNVVAVPDLVEAAK | 122d | 18 |
| FBgn0001128 | 777.12 | 50 | 1 | AEGGGIDLISHIITR  | 132d | 18 |
| FBgn0001128 | 580.1  | 41 | 2 | FVDVFYPGSK       | 132d | 18 |
| FBgn0001128 | 794.52 | 66 | 2 | IVGANAAALPEFEER  | 132d | 18 |
| FBgn0001128 | 816.55 | 52 | 3 | LPPNVVAVPDLVEAAK | 132d | 18 |
| FBgn0001128 | 777    | 94 | 2 | AEGGGIDLISHIITR  | 142d | 18 |
| FBgn0001128 | 579.71 | 44 | 2 | FVDVFYPGSK       | 142d | 18 |
| FBgn0001128 | 794.66 | 40 | 1 | IVGANAAALPEFEER  | 142d | 18 |
| FBgn0001128 | 482.43 | 43 | 1 | LGLMEMIR         | 142d | 18 |
| FBgn0001128 | 846.15 | 35 | 1 | LQGPPTAEEVNYMLK  | 142d | 18 |
| FBgn0001128 | 776.46 | 79 | 3 | AEGGGIDLISHIITR  | 2d   | 28 |
| FBgn0001128 | 580.34 | 49 | 3 | FVDVFYPGSK       | 2d   | 28 |
| FBgn0001128 | 794.44 | 56 | 3 | IVGANAAALPEFEER  | 2d   | 28 |
| FBgn0001128 | 817.1  | 64 | 3 | LPPNVVAVPDLVEAAK | 2d   | 28 |
| FBgn0001128 | 845.84 | 65 | 2 | LQGPPTAEEVNYMLK  | 2d   | 28 |
| FBgn0001128 | 770.65 | 78 | 3 | LTEIINETHENVK    | 2d   | 28 |
| FBgn0001128 | 777.16 | 75 | 3 | AEGGGIDLISHIITR  | 12d  | 28 |
| FBgn0001128 | 580.39 | 50 | 2 | FVDVFYPGSK       | 12d  | 28 |
| FBgn0001128 | 794.62 | 65 | 1 | IVGANAAALPEFEER  | 12d  | 28 |
| FBgn0001128 | 482.47 | 42 | 2 | LGLMEMIR         | 12d  | 28 |
| FBgn0001128 | 816.87 | 63 | 3 | LPPNVVAVPDLVEAAK | 12d  | 28 |
| FBgn0001128 | 770.75 | 68 | 3 | LTEIINETHENVK    | 12d  | 28 |
| FBgn0001128 | 776.99 | 80 | 1 | AEGGGIDLISHIITR  | 22d  | 28 |
| FBgn0001128 | 580.12 | 44 | 1 | FVDVFYPGSK       | 22d  | 28 |
| FBgn0001128 | 817.14 | 57 | 3 | LPPNVVAVPDLVEAAK | 22d  | 28 |
| FBgn0001128 | 770.71 | 59 | 2 | LTEIINETHENVK    | 22d  | 28 |
| FBgn0001128 | 776.81 | 70 | 2 | AEGGGIDLISHIITR  | 32d  | 28 |
| FBgn0001128 | 580.23 | 51 | 1 | FVDVFYPGSK       | 32d  | 28 |
| FBgn0001128 | 794.39 | 50 | 2 | IVGANAAALPEFEER  | 32d  | 28 |
| FBgn0001128 | 817.2  | 62 | 1 | LPPNVVAVPDLVEAAK | 32d  | 28 |



|             |        |    |   |                  |      |    |
|-------------|--------|----|---|------------------|------|----|
| FBgn0001128 | 770.71 | 42 | 1 | LTEIINETHENVK    | 32d  | 28 |
| FBgn0001128 | 776.83 | 74 | 2 | AEGGGIDLISHIITR  | 36d  | 28 |
| FBgn0001128 | 794.5  | 44 | 2 | IVGANAAALPEFEER  | 36d  | 28 |
| FBgn0001128 | 816.99 | 54 | 1 | LPPNVVAVPDLVEAAK | 36d  | 28 |
| FBgn0001128 | 770.7  | 70 | 2 | LTEIINETHENVK    | 36d  | 28 |
| FBgn0001128 | 580.07 | 49 | 3 | FVDVFYPGSK       | 36d  | 28 |
| FBgn0001128 | 794.45 | 53 | 3 | IVGANAAALPEFEER  | 42d  | 28 |
| FBgn0001128 | 816.62 | 55 | 2 | LPPNVVAVPDLVEAAK | 42d  | 28 |
| FBgn0001128 | 580.21 | 44 | 2 | FVDVFYPGSK       | 46d  | 28 |
| FBgn0001128 | 794.4  | 41 | 1 | IVGANAAALPEFEER  | 46d  | 28 |
| FBgn0001128 | 817.1  | 67 | 2 | LPPNVVAVPDLVEAAK | 46d  | 28 |
| FBgn0001128 | 776.93 | 66 | 2 | AEGGGIDLISHIITR  | 50d  | 28 |
| FBgn0001128 | 580.25 | 35 | 3 | FVDVFYPGSK       | 50d  | 28 |
| FBgn0001128 | 794.43 | 56 | 2 | IVGANAAALPEFEER  | 50d  | 28 |
| FBgn0001128 | 816.67 | 45 | 2 | LPPNVVAVPDLVEAAK | 50d  | 28 |
| FBgn0001128 | 776.76 | 81 | 3 | AEGGGIDLISHIITR  | 52d  | 28 |
| FBgn0001128 | 580.34 | 35 | 1 | FVDVFYPGSK       | 52d  | 28 |
| FBgn0001128 | 770.85 | 69 | 3 | LTEIINETHENVK    | 52d  | 28 |
| FBgn0001128 | 777.03 | 55 | 2 | AEGGGIDLISHIITR  | 56d  | 28 |
| FBgn0001128 | 580.46 | 44 | 1 | FVDVFYPGSK       | 56d  | 28 |
| FBgn0001128 | 817.01 | 60 | 3 | LPPNVVAVPDLVEAAK | 56d  | 28 |
| FBgn0001128 | 772.8  | 51 | 1 | VTMFVYEELIDGK    | 56d  | 28 |
| FBgn0001142 | 753.95 | 75 | 1 | SQFLANSPNTALDK   | 2d   | 18 |
| FBgn0001142 | 753.79 | 77 | 1 | SQFLANSPNTALDK   | 22d  | 18 |
| FBgn0001142 | 753.81 | 88 | 2 | SQFLANSPNTALDK   | 132d | 18 |
| FBgn0001142 | 452.27 | 52 | 1 | AIEEAIEK         | 2d   | 28 |
| FBgn0001142 | 754.07 | 85 | 2 | SQFLANSPNTALDK   | 12d  | 28 |
| FBgn0001142 | 754.01 | 81 | 2 | SQFLANSPNTALDK   | 22d  | 28 |
| FBgn0001142 | 753.87 | 78 | 6 | SQFLANSPNTALDK   | 36d  | 28 |
| FBgn0001142 | 753.82 | 87 | 3 | SQFLANSPNTALDK   | 42d  | 28 |
| FBgn0001142 | 753.82 | 75 | 2 | SQFLANSPNTALDK   | 46d  | 28 |
| FBgn0001142 | 753.78 | 90 | 5 | SQFLANSPNTALDK   | 50d  | 28 |

|             |        |     |   |                   |      |    |
|-------------|--------|-----|---|-------------------|------|----|
| FBgn0001142 | 754.09 | 64  | 1 | SQFLANSPNTALDK    | 52d  | 28 |
| FBgn0001145 | 494.95 | 50  | 2 | DIVDAHYP          | 2d   | 18 |
| FBgn0001145 | 573.7  | 60  | 3 | TLDFIPQSPK        | 2d   | 18 |
| FBgn0001145 | 626.69 | 40  | 1 | FDGTPTDTNKR       | 22d  | 18 |
| FBgn0001145 | 853.33 | 105 | 3 | HETSSINDFSAGVANR  | 22d  | 18 |
| FBgn0001145 | 573.78 | 52  | 1 | TLDFIPQSPK        | 22d  | 18 |
| FBgn0001145 | 569.42 | 35  | 1 | HETSSINDFSAGVANR  | 42d  | 18 |
| FBgn0001145 | 573.75 | 49  | 1 | TLDFIPQSPK        | 42d  | 18 |
| FBgn0001145 | 495.26 | 35  | 1 | DIVDAHYP          | 62d  | 18 |
| FBgn0001145 | 853.29 | 112 | 1 | HETSSINDFSAGVANR  | 62d  | 18 |
| FBgn0001145 | 508.26 | 51  | 2 | ILEDSPNAR         | 62d  | 18 |
| FBgn0001145 | 532.45 | 44  | 1 | KTCLEVANK         | 62d  | 18 |
| FBgn0001145 | 573.66 | 44  | 1 | TLDFIPQSPK        | 62d  | 18 |
| FBgn0001145 | 627.03 | 49  | 1 | FDGTPTDTNKR       | 82d  | 18 |
| FBgn0001145 | 853.3  | 97  | 2 | HETSSINDFSAGVANR  | 82d  | 18 |
| FBgn0001145 | 508.22 | 51  | 1 | ILEDSPNAR         | 82d  | 18 |
| FBgn0001145 | 573.73 | 49  | 3 | TLDFIPQSPK        | 82d  | 18 |
| FBgn0001145 | 853.47 | 106 | 2 | HETSSINDFSAGVANR  | 102d | 18 |
| FBgn0001145 | 573.63 | 42  | 1 | TLDFIPQSPK        | 102d | 18 |
| FBgn0001145 | 573.94 | 47  | 2 | TLDFIPQSPK        | 112d | 18 |
| FBgn0001145 | 508.22 | 45  | 2 | ILEDSPNAR         | 122d | 18 |
| FBgn0001145 | 573.95 | 55  | 3 | TLDFIPQSPK        | 122d | 18 |
| FBgn0001145 | 626.9  | 41  | 1 | FDGTPTDTNKR       | 132d | 18 |
| FBgn0001145 | 507.93 | 39  | 1 | ILEDSPNAR         | 132d | 18 |
| FBgn0001145 | 573.73 | 59  | 2 | TLDFIPQSPK        | 132d | 18 |
| FBgn0001145 | 508.48 | 46  | 1 | ILEDSPNAR         | 142d | 18 |
| FBgn0001145 | 573.52 | 39  | 1 | TLDFIPQSPK        | 142d | 18 |
| FBgn0001145 | 495.05 | 41  | 3 | DIVDAHYP          | 2d   | 28 |
| FBgn0001145 | 508.11 | 51  | 2 | ILEDSPNAR         | 2d   | 28 |
| FBgn0001145 | 655.28 | 37  | 1 | RPSSNCDPYSVVEAILR | 2d   | 28 |
| FBgn0001145 | 573.87 | 62  | 4 | TLDFIPQSPK        | 2d   | 28 |
| FBgn0001145 | 495.11 | 36  | 1 | DIVDAHYP          | 12d  | 28 |

|             |         |     |   |                         |      |    |
|-------------|---------|-----|---|-------------------------|------|----|
| FBgn0001145 | 573.54  | 63  | 4 | TLDFIPQSPK              | 12d  | 28 |
| FBgn0001145 | 626.8   | 53  | 2 | FDGTPTDTNKR             | 22d  | 28 |
| FBgn0001145 | 853.24  | 105 | 2 | HETSSINDFSAGVANR        | 22d  | 28 |
| FBgn0001145 | 626.66  | 49  | 1 | FDGTPTDTNKR             | 32d  | 28 |
| FBgn0001145 | 853.3   | 90  | 3 | HETSSINDFSAGVANR        | 32d  | 28 |
| FBgn0001145 | 942.67  | 65  | 1 | NGFPGPQGPYYCGVGANK      | 32d  | 28 |
| FBgn0001145 | 573.49  | 57  | 2 | TLDFIPQSPK              | 32d  | 28 |
| FBgn0001145 | 853.32  | 92  | 2 | HETSSINDFSAGVANR        | 36d  | 28 |
| FBgn0001145 | 573.69  | 54  | 5 | TLDFIPQSPK              | 36d  | 28 |
| FBgn0001145 | 495.33  | 39  | 1 | DIVDAHYP                | 42d  | 28 |
| FBgn0001145 | 626.56  | 54  | 2 | FDGTPTDTNKR             | 42d  | 28 |
| FBgn0001145 | 853.28  | 92  | 2 | HETSSINDFSAGVANR        | 42d  | 28 |
| FBgn0001145 | 573.77  | 57  | 3 | TLDFIPQSPK              | 42d  | 28 |
| FBgn0001145 | 853.28  | 89  | 2 | HETSSINDFSAGVANR        | 46d  | 28 |
| FBgn0001145 | 573.7   | 55  | 2 | TLDFIPQSPK              | 46d  | 28 |
| FBgn0001145 | 573.72  | 48  | 2 | TLDFIPQSPK              | 52d  | 28 |
| FBgn0001145 | 626.63  | 40  | 1 | FDGTPTDTNKR             | 56d  | 28 |
| FBgn0001145 | 853.44  | 69  | 3 | HETSSINDFSAGVANR        | 56d  | 28 |
| FBgn0001149 | 473.46  | 38  | 1 | APADPEAFK               | 42d  | 18 |
| FBgn0001149 | 926.13  | 47  | 1 | LLNLQAGEHLKPEFLK        | 42d  | 18 |
| FBgn0001149 | 962.15  | 40  | 1 | VTPGWEENWAGCLEFK        | 132d | 18 |
| FBgn0001149 | 962.58  | 47  | 1 | VTPGWEENWAGCLEFK        | 142d | 18 |
| FBgn0001149 | 962.34  | 69  | 1 | VTPGWEENWAGCLEFK        | 52d  | 28 |
| FBgn0001149 | 926.12  | 55  | 1 | LLNLQAGEHLKPEFLK        | 56d  | 28 |
| FBgn0001149 | 962.3   | 67  | 2 | VTPGWEENWAGCLEFK        | 56d  | 28 |
| FBgn0001196 | 1151.36 | 55  | 3 | LLSGVTIAQGGVLPNIQAVLLPK | 2d   | 18 |
| FBgn0001196 | 1151.54 | 58  | 2 | LLSGVTIAQGGVLPNIQAVLLPK | 22d  | 18 |
| FBgn0001196 | 473.24  | 56  | 1 | AGLQFPVGR               | 42d  | 18 |
| FBgn0001196 | 768.29  | 64  | 2 | LLSGVTIAQGGVLPNIQAVLLPK | 42d  | 18 |
| FBgn0001196 | 473.04  | 47  | 1 | AGLQFPVGR               | 62d  | 18 |
| FBgn0001196 | 768.19  | 78  | 3 | LLSGVTIAQGGVLPNIQAVLLPK | 62d  | 18 |
| FBgn0001196 | 473.44  | 39  | 1 | AGLQFPVGR               | 82d  | 18 |

|             |         |    |   |                         |      |    |
|-------------|---------|----|---|-------------------------|------|----|
| FBgn0001196 | 1151.92 | 71 | 1 | LLSGVTIAQGGVLPNIQAVLLPK | 102d | 18 |
| FBgn0001196 | 768     | 70 | 2 | LLSGVTIAQGGVLPNIQAVLLPK | 112d | 18 |
| FBgn0001196 | 1151.94 | 88 | 5 | LLSGVTIAQGGVLPNIQAVLLPK | 122d | 18 |
| FBgn0001196 | 1151.85 | 37 | 1 | LLSGVTIAQGGVLPNIQAVLLPK | 132d | 18 |
| FBgn0001196 | 768.28  | 55 | 1 | LLSGVTIAQGGVLPNIQAVLLPK | 142d | 18 |
| FBgn0001196 | 473.1   | 40 | 1 | AGLQFPVGR               | 2d   | 28 |
| FBgn0001196 | 1151.63 | 70 | 2 | LLSGVTIAQGGVLPNIQAVLLPK | 2d   | 28 |
| FBgn0001196 | 473.33  | 56 | 3 | AGLQFPVGR               | 12d  | 28 |
| FBgn0001196 | 768.29  | 63 | 3 | LLSGVTIAQGGVLPNIQAVLLPK | 12d  | 28 |
| FBgn0001196 | 473.32  | 48 | 1 | AGLQFPVGR               | 32d  | 28 |
| FBgn0001196 | 768.12  | 77 | 1 | LLSGVTIAQGGVLPNIQAVLLPK | 32d  | 28 |
| FBgn0001196 | 473.32  | 44 | 1 | AGLQFPVGR               | 36d  | 28 |
| FBgn0001196 | 768.3   | 66 | 4 | LLSGVTIAQGGVLPNIQAVLLPK | 36d  | 28 |
| FBgn0001196 | 472.91  | 51 | 1 | AGLQFPVGR               | 42d  | 28 |
| FBgn0001196 | 401.58  | 36 | 1 | ELAGNAAR                | 42d  | 28 |
| FBgn0001196 | 1151.85 | 68 | 4 | LLSGVTIAQGGVLPNIQAVLLPK | 42d  | 28 |
| FBgn0001196 | 768.19  | 43 | 3 | LLSGVTIAQGGVLPNIQAVLLPK | 46d  | 28 |
| FBgn0001196 | 401.96  | 35 | 1 | ELAGNAAR                | 50d  | 28 |
| FBgn0001196 | 1151.83 | 66 | 3 | LLSGVTIAQGGVLPNIQAVLLPK | 50d  | 28 |
| FBgn0001196 | 1151.53 | 74 | 3 | LLSGVTIAQGGVLPNIQAVLLPK | 52d  | 28 |
| FBgn0001196 | 1151.74 | 59 | 2 | LLSGVTIAQGGVLPNIQAVLLPK | 56d  | 28 |
| FBgn0001198 | 473.12  | 44 | 2 | AGLQFPVGR               | 22d  | 18 |
| FBgn0001198 | 888.16  | 89 | 3 | AMSIMNSFVNDIFER         | 42d  | 18 |
| FBgn0001198 | 887.33  | 56 | 2 | AMSIMNSFVNDIFER         | 112d | 18 |
| FBgn0001198 | 887.51  | 46 | 2 | AMSIMNSFVNDIFER         | 122d | 18 |
| FBgn0001198 | 477.64  | 37 | 1 | LLLPGELAK               | 2d   | 28 |
| FBgn0001198 | 887.92  | 51 | 1 | AMSIMNSFVNDIFER         | 32d  | 28 |
| FBgn0001198 | 887.91  | 93 | 3 | AMSIMNSFVNDIFER         | 36d  | 28 |
| FBgn0001198 | 888.01  | 80 | 1 | AMSIMNSFVNDIFER         | 42d  | 28 |
| FBgn0001198 | 888.01  | 72 | 2 | AMSIMNSFVNDIFER         | 50d  | 28 |
| FBgn0001198 | 888.01  | 73 | 2 | AMSIMNSFVNDIFER         | 56d  | 28 |
| FBgn0001206 | 395.53  | 47 | 1 | ASTLDKR                 | 112d | 18 |

|             |         |     |   |                         |      |    |
|-------------|---------|-----|---|-------------------------|------|----|
| FBgn0001208 | 1191.7  | 65  | 2 | YPITQFQPLYVADSFE TAK    | 2d   | 18 |
| FBgn0001215 | 885.51  | 91  | 3 | DGSGGQNSNNSTVGGAYGK     | 2d   | 28 |
| FBgn0001215 | 658.76  | 37  | 1 | QDIDSPNAGATVK           | 2d   | 28 |
| FBgn0001215 | 859.96  | 39  | 2 | VFLGGLPSNVTETDLR        | 2d   | 28 |
| FBgn0001215 | 859.97  | 34  | 1 | VFLGGLPSNVTETDLR        | 36d  | 28 |
| FBgn0001216 | 1156.03 | 111 | 1 | SINPDEAVAYGAAVQAAILHGDK | 2d   | 18 |
| FBgn0001216 | 745.1   | 72  | 1 | TTPSYVAFTESER           | 122d | 18 |
| FBgn0001216 | 744.75  | 37  | 1 | TTPSYVAFTESER           | 132d | 18 |
| FBgn0001218 | 736.87  | 70  | 3 | EWSDTNVQHDIK            | 2d   | 18 |
| FBgn0001218 | 931.75  | 61  | 3 | WLEQNPADPPEEYKK         | 2d   | 18 |
| FBgn0001218 | 649     | 79  | 2 | DLEAIVQPVI AK           | 42d  | 18 |
| FBgn0001218 | 648.93  | 72  | 1 | DLEAIVQPVI AK           | 102d | 18 |
| FBgn0001218 | 847.14  | 51  | 1 | NQLTTNPENTVFD AK        | 102d | 18 |
| FBgn0001218 | 931.79  | 50  | 1 | WLEQNPADPPEEYKK         | 102d | 18 |
| FBgn0001218 | 477.93  | 47  | 2 | ALSGSHQVR               | 112d | 18 |
| FBgn0001218 | 649.02  | 100 | 3 | DLEAIVQPVI AK           | 112d | 18 |
| FBgn0001218 | 648.8   | 82  | 3 | DLEAIVQPVI AK           | 122d | 18 |
| FBgn0001218 | 931.92  | 54  | 1 | WLEQNPADPPEEYKK         | 122d | 18 |
| FBgn0001218 | 648.95  | 81  | 1 | DLEAIVQPVI AK           | 132d | 18 |
| FBgn0001218 | 648.94  | 72  | 1 | DLEAIVQPVI AK           | 142d | 18 |
| FBgn0001218 | 648     | 47  | 1 | FEELNLDLFR              | 142d | 18 |
| FBgn0001218 | 1143.57 | 45  | 1 | LYQGAGGAPPPEGDDADLKDEL  | 142d | 18 |
| FBgn0001218 | 846.99  | 36  | 1 | NQLTTNPENTVFD AK        | 2d   | 28 |
| FBgn0001218 | 931.8   | 71  | 3 | WLEQNPADPPEEYKK         | 2d   | 28 |
| FBgn0001218 | 847.14  | 57  | 1 | NQLTTNPENTVFD AK        | 12d  | 28 |
| FBgn0001218 | 931.81  | 38  | 1 | WLEQNPADPPEEYKK         | 12d  | 28 |
| FBgn0001218 | 846.69  | 42  | 3 | NQLTTNPENTVFD AK        | 36d  | 28 |
| FBgn0001218 | 847.03  | 51  | 2 | NQLTTNPENTVFD AK        | 42d  | 28 |
| FBgn0001218 | 931.47  | 68  | 1 | WLEQNPADPPEEYKK         | 42d  | 28 |
| FBgn0001218 | 847.02  | 37  | 1 | NQLTTNPENTVFD AK        | 46d  | 28 |
| FBgn0001218 | 621.72  | 40  | 2 | WLEQNPADPPEEYKK         | 46d  | 28 |
| FBgn0001218 | 846.87  | 66  | 3 | NQLTTNPENTVFD AK        | 50d  | 28 |

|             |        |    |   |                  |      |    |
|-------------|--------|----|---|------------------|------|----|
| FBgn0001218 | 931.79 | 68 | 3 | WLEQNPADPEEYKK   | 50d  | 28 |
| FBgn0001218 | 846.95 | 39 | 2 | NQLTTNPENTVFDK   | 52d  | 28 |
| FBgn0001218 | 931.57 | 46 | 2 | WLEQNPADPEEYKK   | 52d  | 28 |
| FBgn0001218 | 748.6  | 62 | 1 | AKFEELNLDLFR     | 56d  | 28 |
| FBgn0001219 | 533.09 | 49 | 1 | HWPFEVVSADGKPK   | 2d   | 18 |
| FBgn0001219 | 563.38 | 49 | 2 | IEVTYKDEK        | 2d   | 18 |
| FBgn0001219 | 678.4  | 81 | 2 | KFDDAAVQSDMK     | 2d   | 18 |
| FBgn0001219 | 624.76 | 50 | 3 | LVTHFVQEFK       | 2d   | 18 |
| FBgn0001219 | 840.02 | 60 | 1 | NQVAMNPTQTIFDAK  | 2d   | 18 |
| FBgn0001219 | 727.29 | 65 | 2 | SVIHDIVLVGGSTR   | 2d   | 18 |
| FBgn0001219 | 744.35 | 61 | 3 | TTPSYVAFTDTER    | 2d   | 18 |
| FBgn0001219 | 533.3  | 58 | 1 | HWPFEVVSADGKPK   | 22d  | 18 |
| FBgn0001219 | 624.9  | 59 | 3 | LVTHFVQEFK       | 22d  | 18 |
| FBgn0001219 | 727.21 | 52 | 2 | SVIHDIVLVGGSTR   | 22d  | 18 |
| FBgn0001219 | 627.72 | 73 | 3 | FEELNADLFR       | 42d  | 18 |
| FBgn0001219 | 533.28 | 56 | 1 | HWPFEVVSADGKPK   | 42d  | 18 |
| FBgn0001219 | 727.49 | 67 | 1 | SVIHDIVLVGGSTR   | 42d  | 18 |
| FBgn0001219 | 744.94 | 41 | 1 | TTPSYVAFTDTER    | 42d  | 18 |
| FBgn0001219 | 744.36 | 56 | 2 | TTPSYVAFTDTER    | 62d  | 18 |
| FBgn0001219 | 601.09 | 65 | 1 | DAGTIAGLNVL      | 82d  | 18 |
| FBgn0001219 | 846.67 | 46 | 3 | STAGDTHLGGEDFDNR | 82d  | 18 |
| FBgn0001219 | 727.31 | 71 | 3 | SVIHDIVLVGGSTR   | 82d  | 18 |
| FBgn0001219 | 615.38 | 45 | 1 | VEIANDQGNR       | 82d  | 18 |
| FBgn0001219 | 600.71 | 74 | 3 | DAGTIAGLNVL      | 102d | 18 |
| FBgn0001219 | 628.02 | 73 | 2 | FEELNADLFR       | 102d | 18 |
| FBgn0001219 | 533.01 | 64 | 3 | HWPFEVVSADGKPK   | 102d | 18 |
| FBgn0001219 | 839.99 | 49 | 2 | NQVAMNPTQTIFDAK  | 102d | 18 |
| FBgn0001219 | 727.5  | 49 | 1 | SVIHDIVLVGGSTR   | 102d | 18 |
| FBgn0001219 | 627.95 | 73 | 2 | FEELNADLFR       | 112d | 18 |
| FBgn0001219 | 533.31 | 46 | 1 | HWPFEVVSADGKPK   | 112d | 18 |
| FBgn0001219 | 524.87 | 38 | 1 | LLQDLFNGK        | 112d | 18 |
| FBgn0001219 | 840.06 | 39 | 1 | NQVAMNPTQTIFDAK  | 112d | 18 |

|             |        |    |   |                  |      |    |
|-------------|--------|----|---|------------------|------|----|
| FBgn0001219 | 727.03 | 44 | 1 | SVIHDIVLVGGSTR   | 112d | 18 |
| FBgn0001219 | 744.94 | 53 | 1 | TTPSYVAFTDTER    | 112d | 18 |
| FBgn0001219 | 627.51 | 59 | 2 | FEELNADLFR       | 122d | 18 |
| FBgn0001219 | 840.12 | 60 | 2 | NQVAMNPTQTIFDAK  | 122d | 18 |
| FBgn0001219 | 727.27 | 59 | 2 | SVIHDIVLVGGSTR   | 122d | 18 |
| FBgn0001219 | 627.63 | 60 | 2 | FEELNADLFR       | 132d | 18 |
| FBgn0001219 | 532.76 | 46 | 1 | HWPFEVVSADGKPK   | 132d | 18 |
| FBgn0001219 | 727.31 | 73 | 3 | SVIHDIVLVGGSTR   | 132d | 18 |
| FBgn0001219 | 600.93 | 60 | 2 | DAGTIAGLNVL      | 142d | 18 |
| FBgn0001219 | 628.01 | 60 | 2 | FEELNADLFR       | 142d | 18 |
| FBgn0001219 | 524.83 | 34 | 1 | LLQDLFNGK        | 142d | 18 |
| FBgn0001219 | 625.03 | 45 | 1 | LVTHFVQEFK       | 142d | 18 |
| FBgn0001219 | 411.21 | 41 | 1 | MVNEAEK          | 142d | 18 |
| FBgn0001219 | 839.96 | 54 | 2 | NQVAMNPTQTIFDAK  | 142d | 18 |
| FBgn0001219 | 846.99 | 60 | 2 | STAGDTHLGGEDFDNR | 142d | 18 |
| FBgn0001219 | 727.63 | 51 | 1 | SVIHDIVLVGGSTR   | 142d | 18 |
| FBgn0001219 | 600.62 | 75 | 3 | DAGTIAGLNVL      | 2d   | 28 |
| FBgn0001219 | 627.85 | 57 | 2 | FEELNADLFR       | 2d   | 28 |
| FBgn0001219 | 563.11 | 47 | 3 | IEVTYKDEK        | 2d   | 28 |
| FBgn0001219 | 524.86 | 38 | 1 | LLQDLFNGK        | 2d   | 28 |
| FBgn0001219 | 624.93 | 47 | 3 | LVTHFVQEFK       | 2d   | 28 |
| FBgn0001219 | 840.16 | 74 | 3 | NQVAMNPTQTIFDAK  | 2d   | 28 |
| FBgn0001219 | 846.77 | 58 | 3 | STAGDTHLGGEDFDNR | 2d   | 28 |
| FBgn0001219 | 727.51 | 67 | 3 | SVIHDIVLVGGSTR   | 2d   | 28 |
| FBgn0001219 | 744.32 | 46 | 1 | TTPSYVAFTDTER    | 2d   | 28 |
| FBgn0001219 | 627.73 | 54 | 3 | FEELNADLFR       | 12d  | 28 |
| FBgn0001219 | 533.36 | 47 | 1 | HWPFEVVSADGKPK   | 12d  | 28 |
| FBgn0001219 | 563.41 | 37 | 1 | IEVTYKDEK        | 12d  | 28 |
| FBgn0001219 | 524.78 | 63 | 3 | LLQDLFNGK        | 12d  | 28 |
| FBgn0001219 | 839.96 | 60 | 3 | NQVAMNPTQTIFDAK  | 12d  | 28 |
| FBgn0001219 | 727.4  | 60 | 1 | SVIHDIVLVGGSTR   | 12d  | 28 |
| FBgn0001219 | 744.73 | 55 | 1 | TTPSYVAFTDTER    | 12d  | 28 |

|             |         |    |   |                    |     |    |
|-------------|---------|----|---|--------------------|-----|----|
| FBgn0001219 | 624.65  | 46 | 1 | LVTHFVQEFK         | 22d | 28 |
| FBgn0001219 | 600.82  | 53 | 2 | DAGTIAGLNVL        | 32d | 28 |
| FBgn0001219 | 627.76  | 55 | 3 | FEELNADLFR         | 32d | 28 |
| FBgn0001219 | 625.04  | 49 | 3 | LVTHFVQEFK         | 32d | 28 |
| FBgn0001219 | 840.15  | 63 | 1 | NQVAMNPTQTIFDAK    | 32d | 28 |
| FBgn0001219 | 847.02  | 57 | 3 | STAGDTHLGGEDFDNR   | 32d | 28 |
| FBgn0001219 | 727.23  | 82 | 2 | SVIHDIVLVGGSTR     | 32d | 28 |
| FBgn0001219 | 744.98  | 44 | 1 | TTPSYVAFTDTER      | 32d | 28 |
| FBgn0001219 | 601     | 48 | 1 | DAGTIAGLNVL        | 36d | 28 |
| FBgn0001219 | 627.71  | 74 | 2 | FEELNADLFR         | 36d | 28 |
| FBgn0001219 | 624.7   | 52 | 3 | LVTHFVQEFK         | 36d | 28 |
| FBgn0001219 | 839.94  | 59 | 2 | NQVAMNPTQTIFDAK    | 36d | 28 |
| FBgn0001219 | 846.7   | 37 | 1 | STAGDTHLGGEDFDNR   | 36d | 28 |
| FBgn0001219 | 727.33  | 83 | 3 | SVIHDIVLVGGSTR     | 36d | 28 |
| FBgn0001219 | 743.74  | 46 | 1 | TTPSYVAFTDTER      | 36d | 28 |
| FBgn0001219 | 600.7   | 57 | 1 | DAGTIAGLNVL        | 42d | 28 |
| FBgn0001219 | 627.51  | 73 | 3 | FEELNADLFR         | 42d | 28 |
| FBgn0001219 | 533.32  | 57 | 3 | HWPFEVVSADGKPK     | 42d | 28 |
| FBgn0001219 | 624.63  | 52 | 2 | LVTHFVQEFK         | 42d | 28 |
| FBgn0001219 | 839.8   | 60 | 3 | NQVAMNPTQTIFDAK    | 42d | 28 |
| FBgn0001219 | 846.56  | 58 | 2 | STAGDTHLGGEDFDNR   | 42d | 28 |
| FBgn0001219 | 727.31  | 68 | 2 | SVIHDIVLVGGSTR     | 42d | 28 |
| FBgn0001219 | 745.03  | 64 | 6 | TTPSYVAFTDTER      | 42d | 28 |
| FBgn0001219 | 999.07  | 34 | 1 | TVTNAVITVPAYFNDSQR | 42d | 28 |
| FBgn0001219 | 1009.41 | 71 | 3 | WLDANQLADKEEYEHR   | 42d | 28 |
| FBgn0001219 | 627.87  | 55 | 3 | FEELNADLFR         | 46d | 28 |
| FBgn0001219 | 533.43  | 51 | 2 | HWPFEVVSADGKPK     | 46d | 28 |
| FBgn0001219 | 624.98  | 45 | 1 | LVTHFVQEFK         | 46d | 28 |
| FBgn0001219 | 839.84  | 59 | 2 | NQVAMNPTQTIFDAK    | 46d | 28 |
| FBgn0001219 | 727.43  | 71 | 2 | SVIHDIVLVGGSTR     | 46d | 28 |
| FBgn0001219 | 744.36  | 63 | 3 | TTPSYVAFTDTER      | 46d | 28 |
| FBgn0001219 | 627.94  | 73 | 2 | FEELNADLFR         | 50d | 28 |



|             |         |    |   |                     |      |    |
|-------------|---------|----|---|---------------------|------|----|
| FBgn0001219 | 624.89  | 45 | 2 | LVTHFVQEFK          | 50d  | 28 |
| FBgn0001219 | 840.15  | 73 | 1 | NQVAMNPTQTIFDAK     | 50d  | 28 |
| FBgn0001219 | 727.31  | 63 | 3 | SVIHDIVLVGGSTR      | 50d  | 28 |
| FBgn0001219 | 745.01  | 59 | 5 | TTPSYVAFTDTER       | 50d  | 28 |
| FBgn0001219 | 627.94  | 67 | 3 | FEELNADLFR          | 52d  | 28 |
| FBgn0001219 | 839.91  | 37 | 2 | NQVAMNPTQTIFDAK     | 52d  | 28 |
| FBgn0001219 | 846.7   | 55 | 3 | STAGDTHLGGEDFDNR    | 52d  | 28 |
| FBgn0001219 | 727.24  | 77 | 3 | SVIHDIVLVGGSTR      | 52d  | 28 |
| FBgn0001219 | 744.94  | 54 | 3 | TTPSYVAFTDTER       | 52d  | 28 |
| FBgn0001219 | 999.22  | 41 | 1 | TVTNAVITVPAYFNDSQR  | 52d  | 28 |
| FBgn0001219 | 600.69  | 71 | 2 | DAGTIAGLNVLR        | 56d  | 28 |
| FBgn0001219 | 627.44  | 73 | 3 | FEELNADLFR          | 56d  | 28 |
| FBgn0001219 | 592.93  | 37 | 1 | FELSGIPPAPR         | 56d  | 28 |
| FBgn0001219 | 533.19  | 46 | 1 | HWPFEVVSADGKPK      | 56d  | 28 |
| FBgn0001219 | 839.85  | 53 | 1 | NQVAMNPTQTIFDAK     | 56d  | 28 |
| FBgn0001219 | 727.48  | 68 | 1 | SVIHDIVLVGGSTR      | 56d  | 28 |
| FBgn0001219 | 745.01  | 80 | 3 | TTPSYVAFTDTER       | 56d  | 28 |
| FBgn0001220 | 1078.23 | 87 | 1 | ELIEIVNQGESIVHDTETK | 2d   | 18 |
| FBgn0001220 | 1077.82 | 57 | 1 | ELIEIVNQGESIVHDTETK | 62d  | 18 |
| FBgn0001220 | 1078    | 58 | 1 | ELIEIVNQGESIVHDTETK | 82d  | 18 |
| FBgn0001220 | 1078.15 | 59 | 2 | ELIEIVNQGESIVHDTETK | 132d | 18 |
| FBgn0001220 | 614.57  | 36 | 1 | DAGQIAGLNVLR        | 142d | 18 |
| FBgn0001220 | 1078.03 | 80 | 3 | ELIEIVNQGESIVHDTETK | 2d   | 28 |
| FBgn0001220 | 651.79  | 66 | 2 | SKLESLVGDLIK        | 2d   | 28 |
| FBgn0001220 | 719.18  | 54 | 1 | ELIEIVNQGESIVHDTETK | 22d  | 28 |
| FBgn0001220 | 719.2   | 45 | 1 | ELIEIVNQGESIVHDTETK | 46d  | 28 |
| FBgn0001220 | 697.82  | 36 | 1 | ASNGDAWVSSTDGK      | 52d  | 28 |
| FBgn0001220 | 1078    | 80 | 1 | ELIEIVNQGESIVHDTETK | 52d  | 28 |
| FBgn0001220 | 1078.07 | 78 | 1 | ELIEIVNQGESIVHDTETK | 56d  | 28 |
| FBgn0001220 | 652.1   | 54 | 1 | SKLESLVGDLIK        | 56d  | 28 |
| FBgn0001224 | 822.93  | 53 | 1 | IVQIQQVGPAHLNVK     | 2d   | 18 |
| FBgn0001224 | 611.67  | 78 | 3 | QVGASSGSSGAVSK      | 2d   | 18 |

|             |         |    |   |                       |      |    |
|-------------|---------|----|---|-----------------------|------|----|
| FBgn0001224 | 576.09  | 68 | 2 | VQDNSVLVEGNHEER       | 2d   | 18 |
| FBgn0001224 | 611.83  | 64 | 2 | QVGASSGSSGAVSK        | 42d  | 18 |
| FBgn0001224 | 863.31  | 59 | 1 | VQDNSVLVEGNHEER       | 82d  | 18 |
| FBgn0001224 | 822.86  | 60 | 3 | IVQIQQVGAHLNVK        | 2d   | 28 |
| FBgn0001224 | 576.06  | 67 | 3 | VQDNSVLVEGNHEER       | 2d   | 28 |
| FBgn0001225 | 829.93  | 40 | 1 | IIQIQQVGAHLNVK        | 2d   | 18 |
| FBgn0001226 | 1033.16 | 50 | 1 | GFDPNNEVVSTVSSDGVLTLK | 2d   | 18 |
| FBgn0001233 | 626.65  | 71 | 1 | DQVSNSAFVER           | 2d   | 18 |
| FBgn0001233 | 1206.32 | 68 | 1 | GFEVVYMTEPIDEYVIQHLK  | 2d   | 18 |
| FBgn0001233 | 757.82  | 80 | 3 | GVVDSIDLPLNISR        | 2d   | 18 |
| FBgn0001233 | 917.85  | 49 | 1 | NPDDISQEEYGEFYK       | 2d   | 18 |
| FBgn0001233 | 887.95  | 61 | 3 | QLEINPDHPIVETLR       | 2d   | 18 |
| FBgn0001233 | 764.93  | 68 | 3 | SLTNDWEDHLAVK         | 2d   | 18 |
| FBgn0001233 | 797.68  | 36 | 1 | TAGTLTIIDTGIGMTK      | 2d   | 18 |
| FBgn0001233 | 917.6   | 79 | 3 | NPDDISQEEYGEFYK       | 22d  | 18 |
| FBgn0001233 | 764.91  | 73 | 3 | SLTNDWEDHLAVK         | 22d  | 18 |
| FBgn0001233 | 1206    | 60 | 3 | GFEVVYMTEPIDEYVIQHLK  | 42d  | 18 |
| FBgn0001233 | 595.67  | 41 | 2 | HSQFIGYPIK            | 42d  | 18 |
| FBgn0001233 | 764.84  | 76 | 2 | SLTNDWEDHLAVK         | 42d  | 18 |
| FBgn0001233 | 917.72  | 88 | 2 | NPDDISQEEYGEFYK       | 62d  | 18 |
| FBgn0001233 | 757.93  | 53 | 1 | GVVDSIDLPLNISR        | 82d  | 18 |
| FBgn0001233 | 917.67  | 78 | 3 | NPDDISQEEYGEFYK       | 82d  | 18 |
| FBgn0001233 | 765.04  | 62 | 1 | SLTNDWEDHLAVK         | 82d  | 18 |
| FBgn0001233 | 757.81  | 71 | 1 | GVVDSIDLPLNISR        | 112d | 18 |
| FBgn0001233 | 917.8   | 62 | 1 | NPDDISQEEYGEFYK       | 112d | 18 |
| FBgn0001233 | 764.97  | 62 | 2 | SLTNDWEDHLAVK         | 112d | 18 |
| FBgn0001233 | 917.88  | 62 | 2 | NPDDISQEEYGEFYK       | 122d | 18 |
| FBgn0001233 | 764.99  | 52 | 1 | SLTNDWEDHLAVK         | 122d | 18 |
| FBgn0001233 | 764.94  | 65 | 2 | SLTNDWEDHLAVK         | 132d | 18 |
| FBgn0001233 | 626.74  | 74 | 2 | DQVSNSAFVER           | 2d   | 28 |
| FBgn0001233 | 752.25  | 47 | 2 | EGLLEPEDESEKK         | 2d   | 28 |
| FBgn0001233 | 804.41  | 44 | 1 | GFEVVYMTEPIDEYVIQHLK  | 2d   | 28 |

|             |        |    |   |                  |     |    |
|-------------|--------|----|---|------------------|-----|----|
| FBgn0001233 | 757.72 | 83 | 3 | GVVDSIDLPLNISR   | 2d  | 28 |
| FBgn0001233 | 917.84 | 83 | 2 | NPDDISQEEYGEFYK  | 2d  | 28 |
| FBgn0001233 | 888    | 51 | 2 | QLEINPDHPIVETLR  | 2d  | 28 |
| FBgn0001233 | 623.18 | 61 | 4 | SDLVNNLGTIAK     | 2d  | 28 |
| FBgn0001233 | 510.31 | 71 | 3 | SLTNDWEDHLAVK    | 2d  | 28 |
| FBgn0001233 | 797.56 | 69 | 1 | TAGTLTIIDTGIGMTK | 2d  | 28 |
| FBgn0001233 | 520.83 | 54 | 1 | YESLTDPSK        | 2d  | 28 |
| FBgn0001233 | 626.47 | 71 | 1 | DQVSNNSAFVER     | 12d | 28 |
| FBgn0001233 | 757.78 | 77 | 3 | GVVDSIDLPLNISR   | 12d | 28 |
| FBgn0001233 | 917.77 | 88 | 3 | NPDDISQEEYGEFYK  | 12d | 28 |
| FBgn0001233 | 764.79 | 67 | 3 | SLTNDWEDHLAVK    | 12d | 28 |
| FBgn0001233 | 917.92 | 69 | 2 | NPDDISQEEYGEFYK  | 22d | 28 |
| FBgn0001233 | 887.87 | 60 | 1 | QLEINPDHPIVETLR  | 22d | 28 |
| FBgn0001233 | 764.88 | 66 | 2 | SLTNDWEDHLAVK    | 22d | 28 |
| FBgn0001233 | 918    | 80 | 3 | NPDDISQEEYGEFYK  | 32d | 28 |
| FBgn0001233 | 765.07 | 64 | 2 | SLTNDWEDHLAVK    | 32d | 28 |
| FBgn0001233 | 797.54 | 68 | 1 | TAGTLTIIDTGIGMTK | 32d | 28 |
| FBgn0001233 | 917.84 | 92 | 3 | NPDDISQEEYGEFYK  | 36d | 28 |
| FBgn0001233 | 887.88 | 41 | 1 | QLEINPDHPIVETLR  | 36d | 28 |
| FBgn0001233 | 764.92 | 47 | 1 | SLTNDWEDHLAVK    | 36d | 28 |
| FBgn0001233 | 917.82 | 98 | 4 | NPDDISQEEYGEFYK  | 42d | 28 |
| FBgn0001233 | 887.92 | 49 | 1 | QLEINPDHPIVETLR  | 42d | 28 |
| FBgn0001233 | 764.74 | 58 | 2 | SLTNDWEDHLAVK    | 42d | 28 |
| FBgn0001233 | 917.82 | 92 | 3 | NPDDISQEEYGEFYK  | 46d | 28 |
| FBgn0001233 | 764.74 | 66 | 3 | SLTNDWEDHLAVK    | 46d | 28 |
| FBgn0001233 | 752.47 | 44 | 1 | EGLPEPESEKK      | 50d | 28 |
| FBgn0001233 | 757.95 | 83 | 2 | GVVDSIDLPLNISR   | 50d | 28 |
| FBgn0001233 | 918.12 | 77 | 2 | NPDDISQEEYGEFYK  | 50d | 28 |
| FBgn0001233 | 764.85 | 93 | 3 | SLTNDWEDHLAVK    | 50d | 28 |
| FBgn0001233 | 752.28 | 49 | 1 | EGLPEPESEKK      | 52d | 28 |
| FBgn0001233 | 917.73 | 84 | 3 | NPDDISQEEYGEFYK  | 52d | 28 |
| FBgn0001233 | 887.95 | 35 | 1 | QLEINPDHPIVETLR  | 52d | 28 |

|             |         |    |   |                      |      |    |
|-------------|---------|----|---|----------------------|------|----|
| FBgn0001233 | 765     | 69 | 3 | SLTNDWEDHLAVK        | 52d  | 28 |
| FBgn0001233 | 1205.97 | 81 | 2 | GFEVVYMTEPIDEYVIQHLK | 56d  | 28 |
| FBgn0001247 | 366     | 37 | 1 | LNNIEK               | 42d  | 28 |
| FBgn0001248 | 730.38  | 67 | 2 | AGPVVDVLGDEMTR       | 2d   | 18 |
| FBgn0001248 | 762.88  | 50 | 1 | EYEAAGIWYEHR         | 2d   | 18 |
| FBgn0001248 | 734.49  | 80 | 3 | LVTGWQKPIVIGR        | 2d   | 18 |
| FBgn0001248 | 671.84  | 68 | 3 | TVEAEAAHGTVTR        | 2d   | 18 |
| FBgn0001248 | 730.39  | 80 | 1 | AGPVVDVLGDEMTR       | 22d  | 18 |
| FBgn0001248 | 762.86  | 74 | 1 | EYEAAGIWYEHR         | 22d  | 18 |
| FBgn0001248 | 826.13  | 56 | 1 | GTDGQVIDEVINDFK      | 22d  | 18 |
| FBgn0001248 | 671.52  | 48 | 1 | TVEAEAAHGTVTR        | 22d  | 18 |
| FBgn0001248 | 730.55  | 83 | 3 | AGPVVDVLGDEMTR       | 42d  | 18 |
| FBgn0001248 | 860.57  | 43 | 1 | DYQETFEFINTLAK       | 42d  | 18 |
| FBgn0001248 | 762.78  | 60 | 1 | EYEAAGIWYEHR         | 42d  | 18 |
| FBgn0001248 | 716.95  | 59 | 3 | FKDIFEDLYNK          | 42d  | 18 |
| FBgn0001248 | 825.84  | 91 | 2 | GTDGQVIDEVINDFK      | 42d  | 18 |
| FBgn0001248 | 734.24  | 69 | 2 | LVTGWQKPIVIGR        | 42d  | 18 |
| FBgn0001248 | 489.14  | 37 | 1 | NILGGTVFR            | 42d  | 18 |
| FBgn0001248 | 671.61  | 68 | 2 | TVEAEAAHGTVTR        | 42d  | 18 |
| FBgn0001248 | 860.46  | 70 | 1 | DYQETFEFINTLAK       | 62d  | 18 |
| FBgn0001248 | 762.92  | 67 | 2 | EYEAAGIWYEHR         | 62d  | 18 |
| FBgn0001248 | 716.83  | 49 | 1 | FKDIFEDLYNK          | 62d  | 18 |
| FBgn0001248 | 826.07  | 85 | 2 | GTDGQVIDEVINDFK      | 62d  | 18 |
| FBgn0001248 | 489.29  | 44 | 3 | NILGGTVFR            | 62d  | 18 |
| FBgn0001248 | 671.88  | 64 | 3 | TVEAEAAHGTVTR        | 62d  | 18 |
| FBgn0001248 | 551.8   | 37 | 2 | AVDYVVPGPGK          | 82d  | 18 |
| FBgn0001248 | 860.31  | 53 | 1 | DYQETFEFINTLAK       | 82d  | 18 |
| FBgn0001248 | 825.58  | 79 | 2 | GTDGQVIDEVINDFK      | 82d  | 18 |
| FBgn0001248 | 671.76  | 66 | 3 | TVEAEAAHGTVTR        | 82d  | 18 |
| FBgn0001248 | 730.22  | 77 | 3 | AGPVVDVLGDEMTR       | 102d | 18 |
| FBgn0001248 | 762.78  | 52 | 2 | EYEAAGIWYEHR         | 102d | 18 |
| FBgn0001248 | 826.05  | 54 | 2 | GTDGQVIDEVINDFK      | 102d | 18 |

|             |        |    |   |                 |      |    |
|-------------|--------|----|---|-----------------|------|----|
| FBgn0001248 | 671.94 | 46 | 1 | TVEAEAAHGTVTR   | 102d | 18 |
| FBgn0001248 | 730.55 | 65 | 2 | AGPVVDVLGDEMTR  | 112d | 18 |
| FBgn0001248 | 734.59 | 75 | 3 | LVTGWQKPIVIGR   | 112d | 18 |
| FBgn0001248 | 489.13 | 35 | 1 | NILGGTVFR       | 112d | 18 |
| FBgn0001248 | 730.4  | 57 | 2 | AGPVVDVLGDEMTR  | 122d | 18 |
| FBgn0001248 | 762.9  | 56 | 1 | EYEAAGIWYEHR    | 122d | 18 |
| FBgn0001248 | 825.95 | 38 | 1 | GTDGQVIDEVINDFK | 122d | 18 |
| FBgn0001248 | 438.21 | 36 | 1 | IIWDSIK         | 122d | 18 |
| FBgn0001248 | 734.43 | 58 | 2 | LVTGWQKPIVIGR   | 122d | 18 |
| FBgn0001248 | 730.15 | 39 | 1 | AGPVVDVLGDEMTR  | 132d | 18 |
| FBgn0001248 | 826.11 | 38 | 1 | GTDGQVIDEVINDFK | 132d | 18 |
| FBgn0001248 | 734.5  | 60 | 2 | LVTGWQKPIVIGR   | 132d | 18 |
| FBgn0001248 | 730.38 | 67 | 2 | AGPVVDVLGDEMTR  | 142d | 18 |
| FBgn0001248 | 825.99 | 63 | 2 | GTDGQVIDEVINDFK | 142d | 18 |
| FBgn0001248 | 438.37 | 41 | 2 | IIWDSIK         | 142d | 18 |
| FBgn0001248 | 734.62 | 68 | 1 | LVTGWQKPIVIGR   | 142d | 18 |
| FBgn0001248 | 489.02 | 42 | 2 | NILGGTVFR       | 142d | 18 |
| FBgn0001248 | 518.45 | 41 | 1 | RVEEFNLK        | 142d | 18 |
| FBgn0001248 | 730.29 | 69 | 3 | AGPVVDVLGDEMTR  | 2d   | 28 |
| FBgn0001248 | 551.99 | 45 | 2 | AVDYVVPGP GK    | 2d   | 28 |
| FBgn0001248 | 860.39 | 50 | 2 | DYQETFEFINTLAK  | 2d   | 28 |
| FBgn0001248 | 825.81 | 97 | 1 | GTDGQVIDEVINDFK | 2d   | 28 |
| FBgn0001248 | 734.44 | 85 | 3 | LVTGWQKPIVIGR   | 2d   | 28 |
| FBgn0001248 | 671.74 | 62 | 3 | TVEAEAAHGTVTR   | 2d   | 28 |
| FBgn0001248 | 730.43 | 67 | 3 | AGPVVDVLGDEMTR  | 12d  | 28 |
| FBgn0001248 | 551.96 | 38 | 1 | AVDYVVPGP GK    | 12d  | 28 |
| FBgn0001248 | 825.89 | 70 | 3 | GTDGQVIDEVINDFK | 12d  | 28 |
| FBgn0001248 | 734.64 | 80 | 1 | LVTGWQKPIVIGR   | 12d  | 28 |
| FBgn0001248 | 671.73 | 81 | 2 | TVEAEAAHGTVTR   | 12d  | 28 |
| FBgn0001248 | 716.79 | 60 | 1 | FKDIFEDLYNK     | 22d  | 28 |
| FBgn0001248 | 825.64 | 64 | 3 | GTDGQVIDEVINDFK | 22d  | 28 |
| FBgn0001248 | 734.58 | 78 | 3 | LVTGWQKPIVIGR   | 22d  | 28 |

|             |        |    |   |                          |     |    |
|-------------|--------|----|---|--------------------------|-----|----|
| FBgn0001248 | 730.32 | 68 | 3 | AGPVVDVLGDEMTR           | 32d | 28 |
| FBgn0001248 | 762.9  | 64 | 2 | EYEAAGIWYEHR             | 32d | 28 |
| FBgn0001248 | 837.67 | 36 | 1 | GPGIALGMFNTDDSIVDFAHASFK | 32d | 28 |
| FBgn0001248 | 825.77 | 75 | 3 | GTDGQVIDEVINDFK          | 32d | 28 |
| FBgn0001248 | 734.38 | 64 | 2 | LVTGWQKPIVIGR            | 32d | 28 |
| FBgn0001248 | 489.45 | 44 | 1 | NILGGTVFR                | 32d | 28 |
| FBgn0001248 | 730.34 | 70 | 2 | AGPVVDVLGDEMTR           | 36d | 28 |
| FBgn0001248 | 551.78 | 43 | 2 | AVDYVVPGPGK              | 36d | 28 |
| FBgn0001248 | 762.75 | 74 | 2 | EYEAAGIWYEHR             | 36d | 28 |
| FBgn0001248 | 837.78 | 48 | 1 | GPGIALGMFNTDDSIVDFAHASFK | 36d | 28 |
| FBgn0001248 | 825.83 | 66 | 2 | GTDGQVIDEVINDFK          | 36d | 28 |
| FBgn0001248 | 734.49 | 62 | 1 | LVTGWQKPIVIGR            | 36d | 28 |
| FBgn0001248 | 671.71 | 40 | 1 | TVEAEAAHGTVTR            | 36d | 28 |
| FBgn0001248 | 730.51 | 65 | 3 | AGPVVDVLGDEMTR           | 42d | 28 |
| FBgn0001248 | 551.66 | 40 | 2 | AVDYVVPGPGK              | 42d | 28 |
| FBgn0001248 | 762.69 | 69 | 2 | EYEAAGIWYEHR             | 42d | 28 |
| FBgn0001248 | 716.93 | 48 | 1 | FKDIFEDLYNK              | 42d | 28 |
| FBgn0001248 | 825.83 | 78 | 1 | GTDGQVIDEVINDFK          | 42d | 28 |
| FBgn0001248 | 734.3  | 82 | 3 | LVTGWQKPIVIGR            | 42d | 28 |
| FBgn0001248 | 730.28 | 65 | 3 | AGPVVDVLGDEMTR           | 46d | 28 |
| FBgn0001248 | 762.89 | 60 | 1 | EYEAAGIWYEHR             | 46d | 28 |
| FBgn0001248 | 837.3  | 41 | 2 | GPGIALGMFNTDDSIVDFAHASFK | 46d | 28 |
| FBgn0001248 | 825.85 | 44 | 1 | GTDGQVIDEVINDFK          | 46d | 28 |
| FBgn0001248 | 734.25 | 80 | 2 | LVTGWQKPIVIGR            | 46d | 28 |
| FBgn0001248 | 671.84 | 60 | 1 | TVEAEAAHGTVTR            | 46d | 28 |
| FBgn0001248 | 730.52 | 72 | 3 | AGPVVDVLGDEMTR           | 50d | 28 |
| FBgn0001248 | 763    | 43 | 1 | EYEAAGIWYEHR             | 50d | 28 |
| FBgn0001248 | 837.88 | 40 | 1 | GPGIALGMFNTDDSIVDFAHASFK | 50d | 28 |
| FBgn0001248 | 825.94 | 86 | 3 | GTDGQVIDEVINDFK          | 50d | 28 |
| FBgn0001248 | 734.67 | 66 | 2 | LVTGWQKPIVIGR            | 50d | 28 |
| FBgn0001248 | 671.66 | 71 | 3 | TVEAEAAHGTVTR            | 50d | 28 |
| FBgn0001248 | 730.56 | 69 | 1 | AGPVVDVLGDEMTR           | 52d | 28 |

|             |         |    |   |                                |      |    |
|-------------|---------|----|---|--------------------------------|------|----|
| FBgn0001248 | 551.62  | 36 | 2 | AVDYVVPGPGK                    | 52d  | 28 |
| FBgn0001248 | 918.96  | 72 | 3 | DKTEDQVTIDCAEAIK               | 52d  | 28 |
| FBgn0001248 | 763.07  | 44 | 1 | EYEAAGIWYEHR                   | 52d  | 28 |
| FBgn0001248 | 837.86  | 34 | 1 | GPGIALGMFNTDDSIVDFAHASFK       | 52d  | 28 |
| FBgn0001248 | 825.89  | 96 | 2 | GTDGQVIDEVINDFK                | 52d  | 28 |
| FBgn0001248 | 671.63  | 68 | 2 | TVEAEAAHGTVTR                  | 52d  | 28 |
| FBgn0001248 | 730.39  | 60 | 1 | AGPVVDVLGDEMTR                 | 56d  | 28 |
| FBgn0001248 | 860.66  | 50 | 1 | DYQETFEFINTLAK                 | 56d  | 28 |
| FBgn0001248 | 716.72  | 64 | 1 | FKDIFEDLYNK                    | 56d  | 28 |
| FBgn0001248 | 825.52  | 50 | 1 | GTDGQVIDEVINDFK                | 56d  | 28 |
| FBgn0001248 | 671.66  | 59 | 3 | TVEAEAAHGTVTR                  | 56d  | 28 |
| FBgn0001250 | 370.59  | 35 | 1 | KLLNPR                         | 42d  | 18 |
| FBgn0001258 | 876.67  | 54 | 1 | DSLLAQVAEVLPSGHK               | 56d  | 28 |
| FBgn0001263 | 1398.03 | 45 | 1 | VGDMLLAVNQDVTLESNYDDATGLLK     | 2d   | 18 |
| FBgn0001263 | 666.2   | 37 | 1 | NSTEQAVIDLK                    | 82d  | 18 |
| FBgn0001263 | 521.52  | 34 | 1 | FIFDQFPK                       | 122d | 18 |
| FBgn0001263 | 1086.25 | 40 | 1 | FNQEQTTNNNASGGQGMGQGQGQGMAGMNR | 2d   | 28 |
| FBgn0001263 | 666.32  | 71 | 3 | NSTEQAVIDLK                    | 2d   | 28 |
| FBgn0001263 | 751.47  | 54 | 1 | HAEVGSIFISDLR                  | 36d  | 28 |
| FBgn0001263 | 751.55  | 53 | 1 | HAEVGSIFISDLR                  | 42d  | 28 |
| FBgn0001263 | 1581.48 | 38 | 1 | ELGLSLSPNEIGCTIADLIQGQYPEIDSK  | 52d  | 28 |
| FBgn0001263 | 666.22  | 39 | 1 | NSTEQAVIDLK                    | 52d  | 28 |
| FBgn0001291 | 1299.6  | 41 | 1 | IFAPLVINSPDLSSKTVNTPDLEK       | 46d  | 28 |
| FBgn0001291 | 1299.68 | 38 | 1 | IFAPLVINSPDLSSKTVNTPDLEK       | 50d  | 28 |
| FBgn0001308 | 950.62  | 62 | 1 | DLGEVGQAIAPGESSIDLK            | 2d   | 18 |
| FBgn0001308 | 950.45  | 50 | 1 | DLGEVGQAIAPGESSIDLK            | 42d  | 18 |
| FBgn0001308 | 906.55  | 64 | 1 | FVSSPEDVFEVIEEGK               | 42d  | 18 |
| FBgn0001308 | 950.47  | 60 | 1 | DLGEVGQAIAPGESSIDLK            | 132d | 18 |
| FBgn0001308 | 950.68  | 57 | 2 | DLGEVGQAIAPGESSIDLK            | 2d   | 28 |
| FBgn0001308 | 906.35  | 54 | 1 | FVSSPEDVFEVIEEGK               | 2d   | 28 |
| FBgn0001308 | 950.52  | 42 | 1 | DLGEVGQAIAPGESSIDLK            | 12d  | 28 |
| FBgn0001308 | 950.55  | 57 | 1 | DLGEVGQAIAPGESSIDLK            | 42d  | 28 |

|             |         |    |   |                                    |      |    |
|-------------|---------|----|---|------------------------------------|------|----|
| FBgn0001308 | 950.5   | 51 | 1 | DLGEVGQAIAPGESSIDLK                | 56d  | 28 |
| FBgn0001313 | 762.98  | 35 | 1 | KLFDNLYKLELK                       | 42d  | 28 |
| FBgn0001315 | 432.53  | 35 | 1 | DLFNTVR                            | 132d | 18 |
| FBgn0001402 | 945.11  | 34 | 1 | SDFMTVLSDLQHILIR                   | 2d   | 18 |
| FBgn0001941 | 623.32  | 37 | 1 | IILEKYPQIK                         | 32d  | 28 |
| FBgn0001942 | 588.2   | 84 | 2 | DVIAQAQSGTGK                       | 2d   | 18 |
| FBgn0001942 | 769.77  | 78 | 1 | LFVLDEADEMLSR                      | 2d   | 18 |
| FBgn0001942 | 1232.58 | 37 | 1 | DIEQFYHTTIEEMPANIADLI              | 2d   | 28 |
| FBgn0001942 | 588.32  | 69 | 3 | DVIAQAQSGTGK                       | 2d   | 28 |
| FBgn0001942 | 769.67  | 83 | 2 | LFVLDEADEMLSR                      | 2d   | 28 |
| FBgn0001942 | 1312.65 | 46 | 1 | NEIPQDGPASMEPEGVIESTWHEVYDNFDDMNLR | 32d  | 28 |
| FBgn0001942 | 1312.73 | 52 | 1 | NEIPQDGPASMEPEGVIESTWHEVYDNFDDMNLR | 36d  | 28 |
| FBgn0001942 | 1312.66 | 38 | 1 | NEIPQDGPASMEPEGVIESTWHEVYDNFDDMNLR | 42d  | 28 |
| FBgn0001942 | 770.1   | 39 | 1 | LFVLDEADEMLSR                      | 56d  | 28 |
| FBgn0001980 | 1002.52 | 34 | 1 | DIEPTDEFYVNDAFNSK                  | 62d  | 18 |
| FBgn0002031 | 1066.19 | 61 | 2 | GVAYLPSGQSTLLNLPSTIAQ              | 2d   | 18 |
| FBgn0002031 | 676.04  | 34 | 1 | SFGEAGDGLVELR                      | 122d | 18 |
| FBgn0002284 | 996.08  | 64 | 2 | AGGTAGTLLQPVLDNQIGHK               | 2d   | 18 |
| FBgn0002284 | 996.03  | 45 | 1 | AGGTAGTLLQPVLDNQIGHK               | 2d   | 28 |
| FBgn0002525 | 1121.98 | 74 | 3 | AVVDESEDHSVADYYVSASAK              | 2d   | 18 |
| FBgn0002525 | 1121.83 | 66 | 1 | AVVDESEDHSVADYYVSASAK              | 2d   | 28 |
| FBgn0002527 | 403.3   | 34 | 1 | DAKEITK                            | 22d  | 28 |
| FBgn0002528 | 892.69  | 56 | 1 | LNTFGDELFGDSQVLK                   | 2d   | 28 |
| FBgn0002528 | 879.98  | 44 | 1 | ANADLTAIKDELENLK                   | 12d  | 28 |
| FBgn0002563 | 708.23  | 55 | 2 | ENIYEFNQETK                        | 12d  | 28 |
| FBgn0002563 | 790.36  | 40 | 1 | LMGLGEHWYTEDK                      | 12d  | 28 |
| FBgn0002563 | 916.99  | 47 | 1 | DVSIYHADTMPEYYK                    | 22d  | 28 |
| FBgn0002563 | 708.23  | 50 | 2 | ENIYEFNQETK                        | 22d  | 28 |
| FBgn0002563 | 596.7   | 40 | 2 | FYMPVDYTR                          | 22d  | 28 |
| FBgn0002563 | 684.42  | 38 | 1 | IHNIVEMGYK                         | 22d  | 28 |
| FBgn0002563 | 790.5   | 63 | 1 | LMGLGEHWYTEDK                      | 22d  | 28 |
| FBgn0002563 | 916.68  | 66 | 2 | DVSIYHADTMPEYYK                    | 32d  | 28 |



|             |         |    |   |                        |     |    |
|-------------|---------|----|---|------------------------|-----|----|
| FBgn0002563 | 708.15  | 40 | 1 | ENIYEFNQETK            | 32d | 28 |
| FBgn0002563 | 684.57  | 54 | 3 | IHNIVEMGYK             | 32d | 28 |
| FBgn0002563 | 790.35  | 74 | 3 | LMGLGEHWYTEDK          | 32d | 28 |
| FBgn0002563 | 498.17  | 55 | 1 | SSDYTYMK               | 32d | 28 |
| FBgn0002563 | 916.88  | 74 | 1 | DVSIYHADTMPEYYK        | 36d | 28 |
| FBgn0002563 | 708.51  | 52 | 2 | ENIYEFNQETK            | 36d | 28 |
| FBgn0002563 | 596.79  | 49 | 1 | FYMPVDYTR              | 36d | 28 |
| FBgn0002563 | 684.4   | 52 | 1 | IHNIVEMGYK             | 36d | 28 |
| FBgn0002563 | 790.25  | 70 | 3 | LMGLGEHWYTEDK          | 36d | 28 |
| FBgn0002563 | 689.48  | 38 | 1 | YDFPLDISEPHCGFPDR      | 36d | 28 |
| FBgn0002563 | 916.92  | 51 | 2 | DVSIYHADTMPEYYK        | 42d | 28 |
| FBgn0002563 | 708.13  | 53 | 2 | ENIYEFNQETK            | 42d | 28 |
| FBgn0002563 | 596.81  | 44 | 1 | FYMPVDYTR              | 42d | 28 |
| FBgn0002563 | 684.17  | 54 | 3 | IHNIVEMGYK             | 42d | 28 |
| FBgn0002563 | 790.27  | 67 | 3 | LMGLGEHWYTEDK          | 42d | 28 |
| FBgn0002563 | 686.39  | 46 | 1 | TNGYDYSTMIR            | 42d | 28 |
| FBgn0002563 | 737.19  | 83 | 2 | VEDPLMFEDHIK           | 42d | 28 |
| FBgn0002563 | 916.82  | 66 | 4 | DVSIYHADTMPEYYK        | 46d | 28 |
| FBgn0002563 | 708.16  | 48 | 2 | ENIYEFNQETK            | 46d | 28 |
| FBgn0002563 | 596.86  | 44 | 1 | FYMPVDYTR              | 46d | 28 |
| FBgn0002563 | 684.28  | 54 | 3 | IHNIVEMGYK             | 46d | 28 |
| FBgn0002563 | 790.39  | 56 | 2 | LMGLGEHWYTEDK          | 46d | 28 |
| FBgn0002563 | 574.34  | 40 | 1 | SSEFYWTVK              | 46d | 28 |
| FBgn0002563 | 686.51  | 45 | 1 | TNGYDYSTMIR            | 46d | 28 |
| FBgn0002563 | 1033.45 | 36 | 1 | YDFPLDISEPHCGFPDR      | 46d | 28 |
| FBgn0002563 | 708.32  | 47 | 2 | ENIYEFNQETK            | 50d | 28 |
| FBgn0002563 | 708.29  | 57 | 3 | ENIYEFNQETK            | 52d | 28 |
| FBgn0002563 | 1033.67 | 51 | 1 | YDFPLDISEPHCGFPDR      | 52d | 28 |
| FBgn0002563 | 737.17  | 54 | 1 | VEDPLMFEDHIK           | 56d | 28 |
| FBgn0002564 | 596.46  | 39 | 1 | FYMPVDYTR              | 32d | 28 |
| FBgn0002565 | 587.93  | 49 | 2 | DPIFYEVYK              | 2d  | 18 |
| FBgn0002565 | 1181.83 | 63 | 1 | FDVETINVLGNIIQGNADSVDK | 2d  | 18 |

|             |         |     |   |                                  |      |    |
|-------------|---------|-----|---|----------------------------------|------|----|
| FBgn0002565 | 1245.82 | 42  | 1 | FDVETINVLGNIIQGNADSVDKK          | 2d   | 18 |
| FBgn0002565 | 579.68  | 47  | 1 | LMDATNSDYK                       | 2d   | 18 |
| FBgn0002565 | 580.22  | 50  | 2 | TTYLELYQK                        | 2d   | 18 |
| FBgn0002565 | 534.32  | 43  | 2 | VADKDFLMK                        | 2d   | 18 |
| FBgn0002565 | 587.59  | 54  | 1 | DPIFYEVYK                        | 2d   | 28 |
| FBgn0002565 | 1181.51 | 65  | 2 | FDVETINVLGNIIQGNADSVDK           | 2d   | 28 |
| FBgn0002565 | 1245.68 | 57  | 2 | FDVETINVLGNIIQGNADSVDKK          | 2d   | 28 |
| FBgn0002565 | 742.23  | 42  | 1 | LDQSEAHCGVPNR                    | 2d   | 28 |
| FBgn0002565 | 579.74  | 36  | 1 | LMDATNSDYK                       | 2d   | 28 |
| FBgn0002565 | 683.26  | 59  | 2 | QMDNIYNVVIR                      | 2d   | 28 |
| FBgn0002565 | 580.24  | 45  | 3 | TTYLELYQK                        | 2d   | 28 |
| FBgn0002565 | 534.31  | 47  | 3 | VADKDFLMK                        | 2d   | 28 |
| FBgn0002593 | 896.44  | 34  | 1 | AANVEVEPYWPGLFAK                 | 2d   | 18 |
| FBgn0002593 | 1360.36 | 93  | 5 | DLITNIGSGVGAAPAGGAAPAAAAAAPAAESK | 2d   | 18 |
| FBgn0002593 | 1360.27 | 95  | 1 | DLITNIGSGVGAAPAGGAAPAAAAAAPAAESK | 22d  | 18 |
| FBgn0002593 | 1359.88 | 65  | 1 | DLITNIGSGVGAAPAGGAAPAAAAAAPAAESK | 42d  | 18 |
| FBgn0002593 | 1360.07 | 43  | 1 | DLITNIGSGVGAAPAGGAAPAAAAAAPAAESK | 62d  | 18 |
| FBgn0002593 | 1360.25 | 84  | 3 | DLITNIGSGVGAAPAGGAAPAAAAAAPAAESK | 82d  | 18 |
| FBgn0002593 | 1360.45 | 80  | 1 | DLITNIGSGVGAAPAGGAAPAAAAAAPAAESK | 122d | 18 |
| FBgn0002593 | 1360.2  | 41  | 1 | DLITNIGSGVGAAPAGGAAPAAAAAAPAAESK | 132d | 18 |
| FBgn0002593 | 787.52  | 52  | 1 | EVDREDDLVLEK                     | 132d | 18 |
| FBgn0002593 | 1066.54 | 53  | 1 | TNMEDDKVALLENQLAQAK              | 132d | 18 |
| FBgn0002593 | 1360.24 | 87  | 3 | DLITNIGSGVGAAPAGGAAPAAAAAAPAAESK | 2d   | 28 |
| FBgn0002593 | 1360.21 | 87  | 2 | DLITNIGSGVGAAPAGGAAPAAAAAAPAAESK | 12d  | 28 |
| FBgn0002593 | 1360.18 | 77  | 2 | DLITNIGSGVGAAPAGGAAPAAAAAAPAAESK | 36d  | 28 |
| FBgn0002593 | 1360.33 | 79  | 3 | DLITNIGSGVGAAPAGGAAPAAAAAAPAAESK | 42d  | 28 |
| FBgn0002593 | 1360.39 | 77  | 2 | DLITNIGSGVGAAPAGGAAPAAAAAAPAAESK | 46d  | 28 |
| FBgn0002593 | 1360.31 | 82  | 1 | DLITNIGSGVGAAPAGGAAPAAAAAAPAAESK | 50d  | 28 |
| FBgn0002593 | 1360.36 | 90  | 2 | DLITNIGSGVGAAPAGGAAPAAAAAAPAAESK | 52d  | 28 |
| FBgn0002607 | 993.59  | 101 | 3 | VWLDPNEINEIANTNSR                | 2d   | 18 |
| FBgn0002607 | 993.26  | 74  | 2 | VWLDPNEINEIANTNSR                | 2d   | 28 |
| FBgn0002622 | 637.4   | 43  | 3 | IYETPETEYK                       | 2d   | 18 |

|             |         |    |   |                      |      |    |
|-------------|---------|----|---|----------------------|------|----|
| FBgn0002622 | 637.1   | 48 | 1 | IYETPETEYK           | 12d  | 28 |
| FBgn0002719 | 842.15  | 82 | 3 | ILGLGDLGANGMGIPVGK   | 22d  | 18 |
| FBgn0002719 | 1033.75 | 52 | 1 | LGLWGTGDNEVVGSLSGFTR | 22d  | 18 |
| FBgn0002719 | 841.88  | 55 | 2 | ILGLGDLGANGMGIPVGK   | 42d  | 18 |
| FBgn0002719 | 1033.47 | 71 | 1 | LGLWGTGDNEVVGSLSGFTR | 42d  | 18 |
| FBgn0002719 | 1031.11 | 56 | 3 | LHFAQLHEPIDTLAEAVR   | 42d  | 18 |
| FBgn0002719 | 1033.69 | 72 | 2 | LGLWGTGDNEVVGSLSGFTR | 62d  | 18 |
| FBgn0002719 | 1033.59 | 43 | 1 | LGLWGTGDNEVVGSLSGFTR | 82d  | 18 |
| FBgn0002719 | 1033.66 | 99 | 3 | LGLWGTGDNEVVGSLSGFTR | 102d | 18 |
| FBgn0002719 | 553.23  | 44 | 1 | VEGLTEEEAK           | 102d | 18 |
| FBgn0002719 | 842.14  | 48 | 1 | ILGLGDLGANGMGIPVGK   | 112d | 18 |
| FBgn0002719 | 1033.64 | 59 | 2 | LGLWGTGDNEVVGSLSGFTR | 112d | 18 |
| FBgn0002719 | 687.74  | 42 | 1 | LHFAQLHEPIDTLAEAVR   | 112d | 18 |
| FBgn0002719 | 636.45  | 62 | 1 | AQMYDLDYPR           | 122d | 18 |
| FBgn0002719 | 1033.19 | 50 | 1 | LGLWGTGDNEVVGSLSGFTR | 122d | 18 |
| FBgn0002719 | 1033.58 | 60 | 2 | LGLWGTGDNEVVGSLSGFTR | 132d | 18 |
| FBgn0002719 | 764.09  | 37 | 2 | ATGDLYDEFIDFMHACVR   | 142d | 18 |
| FBgn0002719 | 842.13  | 42 | 1 | ILGLGDLGANGMGIPVGK   | 2d   | 28 |
| FBgn0002719 | 1033.47 | 49 | 2 | LGLWGTGDNEVVGSLSGFTR | 2d   | 28 |
| FBgn0002719 | 698.45  | 70 | 1 | NGLATVRPEPVNK        | 2d   | 28 |
| FBgn0002719 | 842.03  | 51 | 1 | ILGLGDLGANGMGIPVGK   | 12d  | 28 |
| FBgn0002719 | 1033.37 | 53 | 2 | LGLWGTGDNEVVGSLSGFTR | 12d  | 28 |
| FBgn0002719 | 842.02  | 66 | 2 | ILGLGDLGANGMGIPVGK   | 22d  | 28 |
| FBgn0002719 | 1031.04 | 52 | 2 | LHFAQLHEPIDTLAEAVR   | 22d  | 28 |
| FBgn0002719 | 636.89  | 73 | 1 | AQMYDLDYPR           | 32d  | 28 |
| FBgn0002719 | 842.05  | 72 | 1 | ILGLGDLGANGMGIPVGK   | 32d  | 28 |
| FBgn0002719 | 1033.37 | 75 | 2 | LGLWGTGDNEVVGSLSGFTR | 32d  | 28 |
| FBgn0002719 | 841.83  | 66 | 1 | ILGLGDLGANGMGIPVGK   | 36d  | 28 |
| FBgn0002719 | 1033.61 | 76 | 2 | LGLWGTGDNEVVGSLSGFTR | 36d  | 28 |
| FBgn0002719 | 842.15  | 63 | 1 | ILGLGDLGANGMGIPVGK   | 42d  | 28 |
| FBgn0002719 | 1033.38 | 78 | 3 | LGLWGTGDNEVVGSLSGFTR | 42d  | 28 |
| FBgn0002719 | 1031.14 | 64 | 2 | LHFAQLHEPIDTLAEAVR   | 42d  | 28 |

|             |         |     |   |                      |     |    |
|-------------|---------|-----|---|----------------------|-----|----|
| FBgn0002719 | 636.9   | 55  | 1 | AQMYDLDYPR           | 46d | 28 |
| FBgn0002719 | 842.04  | 61  | 2 | ILGLDGLGANGMGIPVGK   | 46d | 28 |
| FBgn0002719 | 1033.66 | 54  | 2 | LGLWGTGDNEVVGSLSGFTR | 46d | 28 |
| FBgn0002719 | 1031.1  | 69  | 1 | LHFAQLHEPIDTLAEAVR   | 46d | 28 |
| FBgn0002719 | 842.04  | 73  | 2 | ILGLDGLGANGMGIPVGK   | 50d | 28 |
| FBgn0002719 | 1033.48 | 83  | 3 | LGLWGTGDNEVVGSLSGFTR | 50d | 28 |
| FBgn0002719 | 1145.7  | 80  | 2 | ATGDLYDEFIDEFMHACVR  | 52d | 28 |
| FBgn0002719 | 841.94  | 73  | 1 | ILGLDGLGANGMGIPVGK   | 52d | 28 |
| FBgn0002719 | 1033.55 | 72  | 1 | LGLWGTGDNEVVGSLSGFTR | 52d | 28 |
| FBgn0002719 | 1131.86 | 47  | 1 | FGQNCLIQFEDFANANAFR  | 56d | 28 |
| FBgn0002719 | 530.85  | 50  | 2 | GLAFTHEER            | 56d | 28 |
| FBgn0002719 | 842.06  | 74  | 3 | ILGLDGLGANGMGIPVGK   | 56d | 28 |
| FBgn0002719 | 1033.66 | 89  | 3 | LGLWGTGDNEVVGSLSGFTR | 56d | 28 |
| FBgn0002719 | 1031.03 | 60  | 1 | LHFAQLHEPIDTLAEAVR   | 56d | 28 |
| FBgn0002741 | 523.89  | 71  | 2 | ADLAEQAISK           | 2d  | 18 |
| FBgn0002741 | 1138.95 | 81  | 4 | AEDMSNLTYLNDASVLHNLR | 2d  | 18 |
| FBgn0002741 | 548.12  | 39  | 1 | AEELHAAEVK           | 2d  | 18 |
| FBgn0002741 | 542.54  | 63  | 2 | AGVDHITNEK           | 2d  | 18 |
| FBgn0002741 | 619.38  | 55  | 3 | AGVLGQMEEFR          | 2d  | 18 |
| FBgn0002741 | 945.7   | 97  | 3 | AKLEQTLDELEDSLER     | 2d  | 18 |
| FBgn0002741 | 523.48  | 54  | 3 | ANAEAQVWR            | 2d  | 18 |
| FBgn0002741 | 688.04  | 85  | 6 | ANALQNELEESR         | 2d  | 18 |
| FBgn0002741 | 514.2   | 52  | 1 | ATDQTFSEK            | 2d  | 18 |
| FBgn0002741 | 658.91  | 52  | 1 | DIEDLELNVQK          | 2d  | 18 |
| FBgn0002741 | 666.84  | 61  | 1 | DIQTALEEEQR          | 2d  | 18 |
| FBgn0002741 | 546.75  | 48  | 3 | DKELSSITAK           | 2d  | 18 |
| FBgn0002741 | 977.44  | 100 | 6 | DLEEANIQHESTLANLR    | 2d  | 18 |
| FBgn0002741 | 587.12  | 65  | 3 | DLLDQIGEGGR          | 2d  | 18 |
| FBgn0002741 | 511.84  | 59  | 1 | EGYLLGEIK            | 2d  | 18 |
| FBgn0002741 | 666.78  | 49  | 1 | ELENELDGEQR          | 2d  | 18 |
| FBgn0002741 | 685.05  | 66  | 3 | ELSFQSEEDRK          | 2d  | 18 |
| FBgn0002741 | 653.71  | 61  | 4 | EQLNSLMTTLR          | 2d  | 18 |

|             |         |     |   |                             |    |    |
|-------------|---------|-----|---|-----------------------------|----|----|
| FBgn0002741 | 540.6   | 53  | 3 | GALQDYQER                   | 2d | 18 |
| FBgn0002741 | 790.47  | 74  | 4 | GAYEEGQEQLAVR               | 2d | 18 |
| FBgn0002741 | 573.2   | 48  | 2 | GGGFATVSSAYK                | 2d | 18 |
| FBgn0002741 | 1109.19 | 92  | 3 | GSLEDQVVQTNPVLEAFGNAK       | 2d | 18 |
| FBgn0002741 | 956.8   | 116 | 3 | HNDAVAEMAEQVDQLNK           | 2d | 18 |
| FBgn0002741 | 776.99  | 59  | 1 | IQEKEEEFENTR                | 2d | 18 |
| FBgn0002741 | 703.3   | 57  | 3 | ISLTTQLEDTKR                | 2d | 18 |
| FBgn0002741 | 1213.71 | 65  | 1 | KLESELQTLHSDLDELLNEAK       | 2d | 18 |
| FBgn0002741 | 788.3   | 101 | 3 | LAEAEETIESLNQK              | 2d | 18 |
| FBgn0002741 | 718.76  | 67  | 1 | LAGADIETYLLEK               | 2d | 18 |
| FBgn0002741 | 537.99  | 64  | 3 | LDEAEANALK                  | 2d | 18 |
| FBgn0002741 | 955.02  | 58  | 3 | LEADINELEIALDHANK           | 2d | 18 |
| FBgn0002741 | 1401.36 | 91  | 4 | LEAEKDELQAALAEAEAALEQEENK   | 2d | 18 |
| FBgn0002741 | 586.77  | 75  | 3 | LEDEQVVVLK                  | 2d | 18 |
| FBgn0002741 | 816.3   | 70  | 1 | LEEAGGATSAQIELNK            | 2d | 18 |
| FBgn0002741 | 845.97  | 76  | 2 | LEQTLDELEDSELR              | 2d | 18 |
| FBgn0002741 | 1149.62 | 61  | 1 | LESELQTLHSDLDELLNEAK        | 2d | 18 |
| FBgn0002741 | 808.8   | 88  | 2 | LKVDDLAAELDASQK             | 2d | 18 |
| FBgn0002741 | 1021.62 | 83  | 3 | LLIEIFADHAGQSGGGEQAK        | 2d | 18 |
| FBgn0002741 | 581.04  | 60  | 1 | LSIENSDLLR                  | 2d | 18 |
| FBgn0002741 | 823.82  | 95  | 2 | LSTEVEDLQLEVDR              | 2d | 18 |
| FBgn0002741 | 623.46  | 80  | 3 | LTQEAVADLER                 | 2d | 18 |
| FBgn0002741 | 693.15  | 65  | 2 | NEYYGQLNDLR                 | 2d | 18 |
| FBgn0002741 | 817.57  | 70  | 2 | NKDPLNDTVVDQFK              | 2d | 18 |
| FBgn0002741 | 971.77  | 57  | 1 | NLADEVKDLLDQIGEGGR          | 2d | 18 |
| FBgn0002741 | 883.82  | 86  | 3 | NLNDEIAHQDELINK             | 2d | 18 |
| FBgn0002741 | 515.74  | 39  | 2 | NYSTELFR                    | 2d | 18 |
| FBgn0002741 | 1427.31 | 45  | 1 | QAEQELADAHEQLNEVSAQNASISAAK | 2d | 18 |
| FBgn0002741 | 789.1   | 85  | 2 | QLEEAESQVSQLSK              | 2d | 18 |
| FBgn0002741 | 713.3   | 58  | 3 | QLQHRTLNEVQSK               | 2d | 18 |
| FBgn0002741 | 986.38  | 86  | 3 | RLEAEKDELQAALAEAEAALEQEENK  | 2d | 18 |
| FBgn0002741 | 1216.49 | 113 | 1 | SKGSLEDQVVQTNPVLEAFGNAK     | 2d | 18 |

|             |        |     |   |                           |     |    |
|-------------|--------|-----|---|---------------------------|-----|----|
| FBgn0002741 | 567.81 | 48  | 1 | TALLDSLSGEK               | 2d  | 18 |
| FBgn0002741 | 570.11 | 40  | 2 | TLNDFDASKK                | 2d  | 18 |
| FBgn0002741 | 688.22 | 53  | 2 | VDDLAAELDASQK             | 2d  | 18 |
| FBgn0002741 | 850.24 | 68  | 1 | YQILNPAGIVGVDDPK          | 2d  | 18 |
| FBgn0002741 | 914.48 | 114 | 5 | YQILNPAGIVGVDDPKK         | 2d  | 18 |
| FBgn0002741 | 759.87 | 61  | 1 | AEDMSNLTYLNDASVLHNL       | 22d | 18 |
| FBgn0002741 | 619.5  | 74  | 2 | AGVLGQMEEFR               | 22d | 18 |
| FBgn0002741 | 546.32 | 34  | 1 | AGVLGQMEEFRDER            | 22d | 18 |
| FBgn0002741 | 630.72 | 83  | 3 | AKLEQTLDELEDSELR          | 22d | 18 |
| FBgn0002741 | 523.39 | 60  | 3 | ANAEAQVWR                 | 22d | 18 |
| FBgn0002741 | 687.72 | 67  | 2 | ANALQNELEESR              | 22d | 18 |
| FBgn0002741 | 666.62 | 69  | 2 | DIQTALEEEQR               | 22d | 18 |
| FBgn0002741 | 546.74 | 43  | 2 | DKELSSITAK                | 22d | 18 |
| FBgn0002741 | 977.58 | 77  | 2 | DLEEANIQHESTLANLR         | 22d | 18 |
| FBgn0002741 | 587.16 | 46  | 3 | DLLDQIGEGGR               | 22d | 18 |
| FBgn0002741 | 511.92 | 58  | 1 | EGYLLGEIK                 | 22d | 18 |
| FBgn0002741 | 821.68 | 63  | 3 | EKNEYYGQLNDLR             | 22d | 18 |
| FBgn0002741 | 684.81 | 73  | 2 | ELSFQSEEDRK               | 22d | 18 |
| FBgn0002741 | 653.91 | 56  | 3 | EQLNSLMTTLR               | 22d | 18 |
| FBgn0002741 | 540.67 | 52  | 3 | GALQDYQER                 | 22d | 18 |
| FBgn0002741 | 790.25 | 78  | 6 | GAYEEGQEQLAVR             | 22d | 18 |
| FBgn0002741 | 573.24 | 44  | 3 | GGGFATVSSAYK              | 22d | 18 |
| FBgn0002741 | 1109.1 | 74  | 1 | GSLEDQVVQTNPVLEAFGNAK     | 22d | 18 |
| FBgn0002741 | 956.99 | 80  | 2 | HNDVAEMAQVDQLNK           | 22d | 18 |
| FBgn0002741 | 703.51 | 68  | 2 | ISLTTQLEDTKR              | 22d | 18 |
| FBgn0002741 | 545.36 | 48  | 3 | KADQEISGLK                | 22d | 18 |
| FBgn0002741 | 679.67 | 60  | 1 | KLEADINELEIALDHANK        | 22d | 18 |
| FBgn0002741 | 644.8  | 35  | 1 | KLSIENSDLLR               | 22d | 18 |
| FBgn0002741 | 788.26 | 83  | 3 | LAEAEETIESLNQK            | 22d | 18 |
| FBgn0002741 | 955.1  | 99  | 1 | LEADINELEIALDHANK         | 22d | 18 |
| FBgn0002741 | 934.44 | 41  | 1 | LEAEKDELQAALAEAEAALEQEENK | 22d | 18 |
| FBgn0002741 | 586.74 | 75  | 3 | LEDEQVVVLK                | 22d | 18 |

|             |         |    |   |                           |     |    |
|-------------|---------|----|---|---------------------------|-----|----|
| FBgn0002741 | 816.33  | 71 | 2 | LEEAGGATSAQIELNK          | 22d | 18 |
| FBgn0002741 | 845.9   | 72 | 1 | LEQTLDELEDSLER            | 22d | 18 |
| FBgn0002741 | 808.96  | 91 | 2 | LKVDDLAAELDASQK           | 22d | 18 |
| FBgn0002741 | 580.84  | 58 | 2 | LSIENSDLLR                | 22d | 18 |
| FBgn0002741 | 623.54  | 67 | 4 | LTQEAVADLER               | 22d | 18 |
| FBgn0002741 | 693.16  | 55 | 2 | NEYYGQLNDLR               | 22d | 18 |
| FBgn0002741 | 545.12  | 58 | 3 | NKDPLNDTVVDQFK            | 22d | 18 |
| FBgn0002741 | 620.19  | 42 | 3 | NLEHDLNLR                 | 22d | 18 |
| FBgn0002741 | 883.84  | 91 | 3 | NLNDEIAHQDELINK           | 22d | 18 |
| FBgn0002741 | 515.55  | 42 | 3 | NYSTELFR                  | 22d | 18 |
| FBgn0002741 | 788.83  | 75 | 2 | QLEEAESQVSQLSK            | 22d | 18 |
| FBgn0002741 | 1479.02 | 62 | 2 | RLEAEKDELQAALAEAALAEQEENK | 22d | 18 |
| FBgn0002741 | 1216.83 | 52 | 1 | SKGSLEDQVVQTNPVLEAFGNAK   | 22d | 18 |
| FBgn0002741 | 567.98  | 54 | 1 | TALLDSLSEK                | 22d | 18 |
| FBgn0002741 | 688.4   | 79 | 2 | VDDLAAELDASQK             | 22d | 18 |
| FBgn0002741 | 530.61  | 59 | 1 | VISQQSLER                 | 22d | 18 |
| FBgn0002741 | 850.18  | 79 | 3 | YQILNPAGIVGVDDPK          | 22d | 18 |
| FBgn0002741 | 523.52  | 61 | 1 | ADLAEQAISK                | 42d | 18 |
| FBgn0002741 | 1139.08 | 99 | 3 | AEDMSNLTYLNDASVLHNL       | 42d | 18 |
| FBgn0002741 | 619.24  | 55 | 2 | AGVLGQMEEFR               | 42d | 18 |
| FBgn0002741 | 630.69  | 81 | 3 | AKLEQTLDELEDSL            | 42d | 18 |
| FBgn0002741 | 523.27  | 57 | 1 | ANAEAQVWR                 | 42d | 18 |
| FBgn0002741 | 687.87  | 71 | 2 | ANALQNELEESR              | 42d | 18 |
| FBgn0002741 | 514.18  | 59 | 1 | ATDQTFSEK                 | 42d | 18 |
| FBgn0002741 | 659.03  | 71 | 2 | DIEDLELNVQK               | 42d | 18 |
| FBgn0002741 | 666.84  | 66 | 2 | DIQTALEEEQR               | 42d | 18 |
| FBgn0002741 | 546.97  | 37 | 1 | DKELSSITAK                | 42d | 18 |
| FBgn0002741 | 977.55  | 64 | 4 | DLEEANIQHESLANLR          | 42d | 18 |
| FBgn0002741 | 587.31  | 58 | 3 | DLLDQIGEGGR               | 42d | 18 |
| FBgn0002741 | 787     | 59 | 1 | DLLQQVNPPKYEK             | 42d | 18 |
| FBgn0002741 | 511.56  | 56 | 3 | EGYLLGEIK                 | 42d | 18 |
| FBgn0002741 | 821.99  | 75 | 3 | EKNEYYGQLNDLR             | 42d | 18 |

|             |         |     |   |                             |     |    |
|-------------|---------|-----|---|-----------------------------|-----|----|
| FBgn0002741 | 684.86  | 59  | 3 | ELSFQSEEDRK                 | 42d | 18 |
| FBgn0002741 | 653.73  | 61  | 3 | EQLNSLMTTLR                 | 42d | 18 |
| FBgn0002741 | 540.69  | 49  | 1 | GALQDYQER                   | 42d | 18 |
| FBgn0002741 | 790.34  | 62  | 2 | GAYEEGQEQLAVR               | 42d | 18 |
| FBgn0002741 | 1109.16 | 85  | 3 | GSLEDQVVQTNPVLEAFGNAK       | 42d | 18 |
| FBgn0002741 | 956.84  | 96  | 3 | HNDAVAEMAEQVDQLNK           | 42d | 18 |
| FBgn0002741 | 776.24  | 43  | 1 | IQEKEEEFENTR                | 42d | 18 |
| FBgn0002741 | 703.42  | 60  | 3 | ISLTTQLEDTKR                | 42d | 18 |
| FBgn0002741 | 1018.97 | 116 | 3 | KLEADINELEIALDHANK          | 42d | 18 |
| FBgn0002741 | 1213.39 | 96  | 3 | KLESELQTLHSDLDLLEAK         | 42d | 18 |
| FBgn0002741 | 788.22  | 104 | 3 | LAEAEETIESLNQK              | 42d | 18 |
| FBgn0002741 | 537.72  | 63  | 1 | LDEAEANALK                  | 42d | 18 |
| FBgn0002741 | 637     | 36  | 1 | LEADINELEIALDHANK           | 42d | 18 |
| FBgn0002741 | 1401.03 | 52  | 3 | LEAEKDELQAALEEAEAALEQEENK   | 42d | 18 |
| FBgn0002741 | 845.59  | 85  | 2 | LEQTLDELEDSLK               | 42d | 18 |
| FBgn0002741 | 1149.46 | 56  | 1 | LESELQTLHSDLDLLEAK          | 42d | 18 |
| FBgn0002741 | 808.81  | 94  | 3 | LKVDDLAELDASQK              | 42d | 18 |
| FBgn0002741 | 580.79  | 73  | 3 | LSIENSDLLR                  | 42d | 18 |
| FBgn0002741 | 824.01  | 101 | 3 | LSTEVEDLQLEVDR              | 42d | 18 |
| FBgn0002741 | 623.34  | 71  | 2 | LTQEAVADLER                 | 42d | 18 |
| FBgn0002741 | 693.27  | 66  | 1 | NEYYGQLNDLR                 | 42d | 18 |
| FBgn0002741 | 972.01  | 71  | 2 | NLADEVKDLLDQIGEGGR          | 42d | 18 |
| FBgn0002741 | 883.83  | 75  | 3 | NLNDEIAHQDELINK             | 42d | 18 |
| FBgn0002741 | 515.56  | 37  | 1 | NYSTELFR                    | 42d | 18 |
| FBgn0002741 | 951.95  | 38  | 1 | QAEQELADAHEQLNEVSAQNASISAAK | 42d | 18 |
| FBgn0002741 | 713.08  | 54  | 2 | QLQHTLNEVQSK                | 42d | 18 |
| FBgn0002741 | 1216.66 | 99  | 3 | SKGSLEDQVVQTNPVLEAFGNAK     | 42d | 18 |
| FBgn0002741 | 567.64  | 50  | 1 | TALLDSLSEK                  | 42d | 18 |
| FBgn0002741 | 850.31  | 49  | 1 | YQILNPAGIVGVDDPK            | 42d | 18 |
| FBgn0002741 | 914.21  | 102 | 3 | YQILNPAGIVGVDDPKK           | 42d | 18 |
| FBgn0002741 | 523.94  | 61  | 4 | ADLAEQAISK                  | 62d | 18 |
| FBgn0002741 | 549.16  | 58  | 1 | AEELHAAEVK                  | 62d | 18 |



|             |         |     |   |                         |     |    |
|-------------|---------|-----|---|-------------------------|-----|----|
| FBgn0002741 | 542.38  | 56  | 1 | AGVDHITNEK              | 62d | 18 |
| FBgn0002741 | 630.68  | 45  | 1 | AKLEQTLDELEDSLRL        | 62d | 18 |
| FBgn0002741 | 523.11  | 57  | 3 | ANAEAQVWR               | 62d | 18 |
| FBgn0002741 | 487.29  | 38  | 2 | ANAIANAIAEK             | 62d | 18 |
| FBgn0002741 | 687.91  | 69  | 3 | ANALQNELEESR            | 62d | 18 |
| FBgn0002741 | 522.89  | 64  | 5 | AQLELSQVR               | 62d | 18 |
| FBgn0002741 | 514.24  | 46  | 2 | ATDQTFSEK               | 62d | 18 |
| FBgn0002741 | 666.81  | 71  | 1 | DIQTALEEEQR             | 62d | 18 |
| FBgn0002741 | 546.63  | 41  | 2 | DKELSSITAK              | 62d | 18 |
| FBgn0002741 | 977.42  | 101 | 3 | DLEEANIQHESTLANLR       | 62d | 18 |
| FBgn0002741 | 587.53  | 53  | 2 | DLLDQIGEGGR             | 62d | 18 |
| FBgn0002741 | 511.96  | 59  | 4 | EGYLLGEIK               | 62d | 18 |
| FBgn0002741 | 821.93  | 71  | 1 | EKNEYYGQLNDLR           | 62d | 18 |
| FBgn0002741 | 488.44  | 39  | 1 | ELEELGER                | 62d | 18 |
| FBgn0002741 | 666.99  | 73  | 5 | ELENELDGEQR             | 62d | 18 |
| FBgn0002741 | 509.03  | 36  | 3 | ELEQTIQR                | 62d | 18 |
| FBgn0002741 | 684.62  | 52  | 2 | ELSFQSEEDRK             | 62d | 18 |
| FBgn0002741 | 540.73  | 47  | 3 | GALQDYQER               | 62d | 18 |
| FBgn0002741 | 790.25  | 85  | 4 | GAYEEGQEQLEAVR          | 62d | 18 |
| FBgn0002741 | 573.44  | 48  | 3 | GGGFATVSSAYK            | 62d | 18 |
| FBgn0002741 | 1109.17 | 80  | 1 | GSLEDQVVQTNPVLEAFGNAK   | 62d | 18 |
| FBgn0002741 | 738.27  | 80  | 1 | IEELEEVEAER             | 62d | 18 |
| FBgn0002741 | 776.82  | 67  | 2 | IQEKEEFENTR             | 62d | 18 |
| FBgn0002741 | 703.46  | 65  | 1 | ISLTTQLEDTKR            | 62d | 18 |
| FBgn0002741 | 613.47  | 53  | 2 | KAEELHAAEVK             | 62d | 18 |
| FBgn0002741 | 1213.78 | 58  | 2 | KLESELQTLHSDLDLLEAK     | 62d | 18 |
| FBgn0002741 | 359.44  | 37  | 1 | LADELRL                 | 62d | 18 |
| FBgn0002741 | 788.41  | 109 | 2 | LAEAEETIESLNQK          | 62d | 18 |
| FBgn0002741 | 537.75  | 64  | 5 | LDEAEANALK              | 62d | 18 |
| FBgn0002741 | 1401.41 | 75  | 2 | LEAEKDELQAALAEAALEQEENK | 62d | 18 |
| FBgn0002741 | 586.94  | 75  | 2 | LEDEQVVVLK              | 62d | 18 |
| FBgn0002741 | 816.37  | 100 | 3 | LEEAGGATSAQIELNK        | 62d | 18 |

|             |         |    |   |                             |     |    |
|-------------|---------|----|---|-----------------------------|-----|----|
| FBgn0002741 | 845.95  | 43 | 1 | LEQTLDELEDSLER              | 62d | 18 |
| FBgn0002741 | 808.84  | 78 | 2 | LKVDDLAAELDASQK             | 62d | 18 |
| FBgn0002741 | 580.78  | 73 | 1 | LSIENSDLLR                  | 62d | 18 |
| FBgn0002741 | 824.09  | 58 | 1 | LSTEVEDLQLEVDR              | 62d | 18 |
| FBgn0002741 | 442.54  | 34 | 1 | LTNTHLGK                    | 62d | 18 |
| FBgn0002741 | 623.13  | 74 | 4 | LTQEAVADLER                 | 62d | 18 |
| FBgn0002741 | 501.79  | 56 | 1 | NDLENQLR                    | 62d | 18 |
| FBgn0002741 | 693.45  | 64 | 2 | NEYYGQLNDLR                 | 62d | 18 |
| FBgn0002741 | 441.99  | 54 | 3 | NIHEIEK                     | 62d | 18 |
| FBgn0002741 | 817.43  | 43 | 1 | NKDPLNDTVVDQFK              | 62d | 18 |
| FBgn0002741 | 883.94  | 72 | 2 | NLNDEIAHQDELINK             | 62d | 18 |
| FBgn0002741 | 515.81  | 35 | 1 | NYSTELFR                    | 62d | 18 |
| FBgn0002741 | 1426.93 | 36 | 1 | QAEQELADAHEQLNEVSAQNASISAAK | 62d | 18 |
| FBgn0002741 | 788.91  | 95 | 3 | QLEEAESQVSQLSK              | 62d | 18 |
| FBgn0002741 | 713.44  | 48 | 2 | QLQHTLNEVQSK                | 62d | 18 |
| FBgn0002741 | 765.69  | 44 | 1 | RANALQNELEESR               | 62d | 18 |
| FBgn0002741 | 986.07  | 56 | 1 | RLEAEKDELQAALEEAALEQEENK    | 62d | 18 |
| FBgn0002741 | 556.68  | 40 | 2 | SKYESDGVAR                  | 62d | 18 |
| FBgn0002741 | 473.77  | 43 | 2 | TLLEQADR                    | 62d | 18 |
| FBgn0002741 | 688.14  | 86 | 2 | VDDLAAELDASQK               | 62d | 18 |
| FBgn0002741 | 530.71  | 43 | 2 | VISQQSLER                   | 62d | 18 |
| FBgn0002741 | 914.7   | 42 | 1 | YQILNPAGIVGVDDPKK           | 62d | 18 |
| FBgn0002741 | 523.64  | 55 | 2 | ADLAEQAISK                  | 82d | 18 |
| FBgn0002741 | 481.12  | 75 | 1 | ADQEISGLK                   | 82d | 18 |
| FBgn0002741 | 549.23  | 60 | 3 | AEELHAAEVK                  | 82d | 18 |
| FBgn0002741 | 945.28  | 84 | 3 | AKLEQTLDELEDSLER            | 82d | 18 |
| FBgn0002741 | 523.33  | 54 | 2 | ANAEAQVWR                   | 82d | 18 |
| FBgn0002741 | 687.9   | 68 | 3 | ANALQNELEESR                | 82d | 18 |
| FBgn0002741 | 522.71  | 58 | 2 | AQLELSQVR                   | 82d | 18 |
| FBgn0002741 | 514.34  | 54 | 1 | ATDQTFSEK                   | 82d | 18 |
| FBgn0002741 | 1115.74 | 85 | 2 | DELQAALEEAALEQEENK          | 82d | 18 |
| FBgn0002741 | 659.01  | 69 | 1 | DIEDLELNVQK                 | 82d | 18 |

|             |         |     |   |                           |     |    |
|-------------|---------|-----|---|---------------------------|-----|----|
| FBgn0002741 | 666.92  | 69  | 3 | DIQTALEEEQR               | 82d | 18 |
| FBgn0002741 | 546.53  | 43  | 2 | DKELSSITAK                | 82d | 18 |
| FBgn0002741 | 977.42  | 85  | 4 | DLEEANIQHESTLANLR         | 82d | 18 |
| FBgn0002741 | 587.28  | 56  | 2 | DLLDQIGEGGR               | 82d | 18 |
| FBgn0002741 | 511.85  | 52  | 3 | EGYLLGEIK                 | 82d | 18 |
| FBgn0002741 | 821.94  | 75  | 3 | EKNEYYGQLNDLR             | 82d | 18 |
| FBgn0002741 | 488.15  | 35  | 1 | ELEELGER                  | 82d | 18 |
| FBgn0002741 | 666.93  | 55  | 1 | ELENELDGEQR               | 82d | 18 |
| FBgn0002741 | 684.93  | 69  | 2 | ELSFQSEEDRK               | 82d | 18 |
| FBgn0002741 | 540.87  | 59  | 1 | GALQDYQER                 | 82d | 18 |
| FBgn0002741 | 790.35  | 78  | 2 | GAYEEGQEQLEAVR            | 82d | 18 |
| FBgn0002741 | 573.29  | 52  | 5 | GGGFATVSSAYK              | 82d | 18 |
| FBgn0002741 | 1108.93 | 109 | 3 | GSLEDQVVQTNPVLEAFGNAK     | 82d | 18 |
| FBgn0002741 | 956.98  | 111 | 2 | HNDAVAEMAEQVDQLNK         | 82d | 18 |
| FBgn0002741 | 776.94  | 66  | 2 | IQEKEEFENTR               | 82d | 18 |
| FBgn0002741 | 703.5   | 66  | 3 | ISLTTQLEDTKR              | 82d | 18 |
| FBgn0002741 | 679.84  | 53  | 1 | KLEADINELEIALDHANK        | 82d | 18 |
| FBgn0002741 | 1213.79 | 67  | 1 | KLESELQTLHSDLDELLNEAK     | 82d | 18 |
| FBgn0002741 | 644.64  | 44  | 2 | KLSIENSDLLR               | 82d | 18 |
| FBgn0002741 | 788.49  | 93  | 3 | LAEAEETIESLNQK            | 82d | 18 |
| FBgn0002741 | 537.77  | 63  | 2 | LDEAEANALK                | 82d | 18 |
| FBgn0002741 | 955     | 83  | 2 | LEADINELEIALDHANK         | 82d | 18 |
| FBgn0002741 | 1401.3  | 69  | 3 | LEAEKDELQAALEEAEAALEQEENK | 82d | 18 |
| FBgn0002741 | 816.62  | 85  | 2 | LEEAGGATSAQIELNK          | 82d | 18 |
| FBgn0002741 | 845.77  | 88  | 3 | LEQTLDELEDSELR            | 82d | 18 |
| FBgn0002741 | 1149.81 | 68  | 2 | LESELQTLHSDLDELLNEAK      | 82d | 18 |
| FBgn0002741 | 539.78  | 109 | 3 | LKVDDLAAELDASQK           | 82d | 18 |
| FBgn0002741 | 581.06  | 76  | 5 | LSIENSDLLR                | 82d | 18 |
| FBgn0002741 | 823.96  | 84  | 2 | LSTEVEDLQLEVDR            | 82d | 18 |
| FBgn0002741 | 442.94  | 49  | 1 | LTNTHLGK                  | 82d | 18 |
| FBgn0002741 | 623.56  | 73  | 4 | LTQEAVADLER               | 82d | 18 |
| FBgn0002741 | 481.8   | 40  | 2 | LTQEEDAR                  | 82d | 18 |

|             |         |     |   |                             |      |    |
|-------------|---------|-----|---|-----------------------------|------|----|
| FBgn0002741 | 693.28  | 55  | 2 | NEYYGQLNDLR                 | 82d  | 18 |
| FBgn0002741 | 817.38  | 75  | 3 | NKDPLNDTVVDQFK              | 82d  | 18 |
| FBgn0002741 | 620.03  | 47  | 2 | NLEHDLNLR                   | 82d  | 18 |
| FBgn0002741 | 883.86  | 86  | 3 | NLNDEIAHQDELINK             | 82d  | 18 |
| FBgn0002741 | 1479    | 47  | 1 | RLEAEKDELQAAL EEAEAALEQEENK | 82d  | 18 |
| FBgn0002741 | 567.7   | 52  | 1 | TALLDSLSEK                  | 82d  | 18 |
| FBgn0002741 | 596.29  | 82  | 1 | TGEELQAAEDK                 | 82d  | 18 |
| FBgn0002741 | 473.77  | 46  | 1 | TLLEQADR                    | 82d  | 18 |
| FBgn0002741 | 688.58  | 79  | 1 | VDDLAAELDASQK               | 82d  | 18 |
| FBgn0002741 | 850.25  | 79  | 3 | YQILNPAGIVGVDDPK            | 82d  | 18 |
| FBgn0002741 | 1138.97 | 83  | 3 | AEDMSNLTYLNDASVLHNL         | 102d | 18 |
| FBgn0002741 | 549.39  | 54  | 2 | AEELHAAEVK                  | 102d | 18 |
| FBgn0002741 | 542.47  | 61  | 3 | AGVDHITNEK                  | 102d | 18 |
| FBgn0002741 | 619.5   | 50  | 2 | AGVLGQMEEFR                 | 102d | 18 |
| FBgn0002741 | 945.7   | 70  | 2 | AKLEQTLDELEDSL              | 102d | 18 |
| FBgn0002741 | 687.55  | 77  | 1 | ANALQNELEESR                | 102d | 18 |
| FBgn0002741 | 514.31  | 43  | 1 | ATDQTFSEK                   | 102d | 18 |
| FBgn0002741 | 587.31  | 53  | 3 | DLLDQIGEGGR                 | 102d | 18 |
| FBgn0002741 | 511.5   | 41  | 1 | EGYLLGEIK                   | 102d | 18 |
| FBgn0002741 | 684.97  | 58  | 1 | ELSFQSEEDRK                 | 102d | 18 |
| FBgn0002741 | 653.94  | 61  | 4 | EQLNSLMTTLR                 | 102d | 18 |
| FBgn0002741 | 790.5   | 82  | 5 | GAYEEGQEQLAVR               | 102d | 18 |
| FBgn0002741 | 1108.95 | 124 | 3 | GSLEDQVVQTNPVLEAFGNAK       | 102d | 18 |
| FBgn0002741 | 956.86  | 144 | 3 | HNDAVAEMAEQVDQLNK           | 102d | 18 |
| FBgn0002741 | 776.19  | 54  | 1 | IQEKEEFENTR                 | 102d | 18 |
| FBgn0002741 | 703.32  | 63  | 1 | ISLTTQLEDTKR                | 102d | 18 |
| FBgn0002741 | 409.38  | 46  | 1 | KAEELHAAEVK                 | 102d | 18 |
| FBgn0002741 | 479.7   | 34  | 1 | KALEQQIK                    | 102d | 18 |
| FBgn0002741 | 679.8   | 86  | 1 | KLEADINELEIALDHANK          | 102d | 18 |
| FBgn0002741 | 1213.87 | 67  | 2 | KLESELQTLHSDLDLLEAK         | 102d | 18 |
| FBgn0002741 | 537.74  | 66  | 2 | LDEAEANALK                  | 102d | 18 |
| FBgn0002741 | 637.01  | 41  | 1 | LEADINELEIALDHANK           | 102d | 18 |

|             |         |     |   |                             |      |    |
|-------------|---------|-----|---|-----------------------------|------|----|
| FBgn0002741 | 1401.4  | 53  | 2 | LEAEKDELQAAL EEAEAALEQEENK  | 102d | 18 |
| FBgn0002741 | 586.71  | 75  | 1 | LEDEQVVVLK                  | 102d | 18 |
| FBgn0002741 | 816.36  | 72  | 1 | LEEAGGATSAQIELNK            | 102d | 18 |
| FBgn0002741 | 845.97  | 71  | 2 | LEQTLDELEDSLER              | 102d | 18 |
| FBgn0002741 | 766.78  | 56  | 1 | LESELQTLHSDLDELLNEAK        | 102d | 18 |
| FBgn0002741 | 808.66  | 93  | 2 | LKVDDLAAELDASQK             | 102d | 18 |
| FBgn0002741 | 824.08  | 48  | 1 | LSTEVEDLQLEVDR              | 102d | 18 |
| FBgn0002741 | 481.67  | 55  | 1 | LTQEEDAR                    | 102d | 18 |
| FBgn0002741 | 620.48  | 47  | 2 | NLEHDLNLR                   | 102d | 18 |
| FBgn0002741 | 883.97  | 66  | 2 | NLNDEIAHQDELINK             | 102d | 18 |
| FBgn0002741 | 1426.96 | 59  | 3 | QAEQELADAHEQLNEVSAQNASISAAK | 102d | 18 |
| FBgn0002741 | 713.38  | 65  | 3 | QLQHTLNEVQSK                | 102d | 18 |
| FBgn0002741 | 1479.32 | 68  | 1 | RLEAEKDELQAAL EEAEAALEQEENK | 102d | 18 |
| FBgn0002741 | 1216.34 | 98  | 2 | SKGSLEDQVVQTNPVLEAFGNAK     | 102d | 18 |
| FBgn0002741 | 850.05  | 67  | 1 | YQILNPAGIVGVDDPK            | 102d | 18 |
| FBgn0002741 | 914.31  | 72  | 2 | YQILNPAGIVGVDDPKK           | 102d | 18 |
| FBgn0002741 | 1139.08 | 43  | 1 | AEDMSNLTYLNDASVLHNLR        | 112d | 18 |
| FBgn0002741 | 542.55  | 55  | 2 | AGVDHITNEK                  | 112d | 18 |
| FBgn0002741 | 618.77  | 63  | 3 | AGVLGQMEEFR                 | 112d | 18 |
| FBgn0002741 | 945.61  | 102 | 3 | AKLEQTLDELEDSLER            | 112d | 18 |
| FBgn0002741 | 487.2   | 38  | 1 | ANAIANA AEK                 | 112d | 18 |
| FBgn0002741 | 666.76  | 73  | 1 | AQEELEEAEER                 | 112d | 18 |
| FBgn0002741 | 977.44  | 50  | 2 | DLEEANIQHESTLANLR           | 112d | 18 |
| FBgn0002741 | 586.37  | 51  | 2 | DLLDQIGEGGR                 | 112d | 18 |
| FBgn0002741 | 512.01  | 53  | 2 | EGYLLGEIK                   | 112d | 18 |
| FBgn0002741 | 653.83  | 66  | 3 | EQLNSLMTTLR                 | 112d | 18 |
| FBgn0002741 | 790.33  | 68  | 1 | GAYEEGQEQLAVR               | 112d | 18 |
| FBgn0002741 | 1109.01 | 76  | 2 | GSLEDQVVQTNPVLEAFGNAK       | 112d | 18 |
| FBgn0002741 | 956.79  | 88  | 2 | HNDAVAEMAEQVDQLNK           | 112d | 18 |
| FBgn0002741 | 737.95  | 78  | 3 | IEEEEEEVEAER                | 112d | 18 |
| FBgn0002741 | 409.27  | 66  | 3 | KAEELHAAEVK                 | 112d | 18 |
| FBgn0002741 | 479.52  | 44  | 1 | KALEQQIK                    | 112d | 18 |

|             |         |     |   |                             |      |    |
|-------------|---------|-----|---|-----------------------------|------|----|
| FBgn0002741 | 1019.18 | 94  | 2 | KLEADINELEIALDHANK          | 112d | 18 |
| FBgn0002741 | 1213.69 | 72  | 3 | KLESELQTLHSDLDPELLNEAK      | 112d | 18 |
| FBgn0002741 | 788.17  | 81  | 1 | LAEAEETIESLNQK              | 112d | 18 |
| FBgn0002741 | 1401.18 | 73  | 1 | LEAEKDELQAALEEAEAALEQEENK   | 112d | 18 |
| FBgn0002741 | 816.53  | 63  | 1 | LEEAGGATSAQIELNK            | 112d | 18 |
| FBgn0002741 | 845.75  | 67  | 1 | LEQTLDELEDSLER              | 112d | 18 |
| FBgn0002741 | 580.59  | 52  | 1 | LSIENSDLLR                  | 112d | 18 |
| FBgn0002741 | 823.74  | 52  | 1 | LSTEVEDLQLEVDLDR            | 112d | 18 |
| FBgn0002741 | 442.85  | 34  | 3 | LTNTHLGK                    | 112d | 18 |
| FBgn0002741 | 623.24  | 73  | 1 | LTQEAVADLER                 | 112d | 18 |
| FBgn0002741 | 481.46  | 48  | 2 | LTQEEDAR                    | 112d | 18 |
| FBgn0002741 | 693.54  | 52  | 1 | NEYYGQLNDLR                 | 112d | 18 |
| FBgn0002741 | 442     | 43  | 1 | NIHEIEK                     | 112d | 18 |
| FBgn0002741 | 817.12  | 74  | 2 | NKDPLNDTVVDQFK              | 112d | 18 |
| FBgn0002741 | 884.05  | 73  | 1 | NLNDEIAHQDELINK             | 112d | 18 |
| FBgn0002741 | 1427.36 | 43  | 2 | QAEQELADAHEQLNEVSAQNASISAAK | 112d | 18 |
| FBgn0002741 | 788.63  | 79  | 1 | QLEEAESQVSQLSK              | 112d | 18 |
| FBgn0002741 | 1216.82 | 87  | 2 | SKGSLEDQVVQTNPVLEAFGNAK     | 112d | 18 |
| FBgn0002741 | 850.19  | 72  | 2 | YQILNPAGIVGVDDPK            | 112d | 18 |
| FBgn0002741 | 914.58  | 84  | 2 | YQILNPAGIVGVDDPKK           | 112d | 18 |
| FBgn0002741 | 1138.93 | 68  | 3 | AEDMSNLTYLNDASVLHNLNR       | 122d | 18 |
| FBgn0002741 | 548.64  | 43  | 1 | AEELHAAEVK                  | 122d | 18 |
| FBgn0002741 | 619.47  | 58  | 2 | AGVLGQMEEFR                 | 122d | 18 |
| FBgn0002741 | 945.41  | 92  | 3 | AKLEQTLDELEDSLER            | 122d | 18 |
| FBgn0002741 | 658.42  | 55  | 3 | DIEDLELNVQK                 | 122d | 18 |
| FBgn0002741 | 587.39  | 52  | 3 | DLLDQIGEGGR                 | 122d | 18 |
| FBgn0002741 | 653.72  | 66  | 5 | EQLNSLMTTLR                 | 122d | 18 |
| FBgn0002741 | 540.92  | 48  | 1 | GALQDYQER                   | 122d | 18 |
| FBgn0002741 | 1109.15 | 105 | 2 | GSLEDQVVQTNPVLEAFGNAK       | 122d | 18 |
| FBgn0002741 | 957.02  | 106 | 3 | HNDVAEMAQVDQLNK             | 122d | 18 |
| FBgn0002741 | 703.47  | 71  | 1 | ISLTTQLEDTKR                | 122d | 18 |
| FBgn0002741 | 1213.69 | 80  | 3 | KLESELQTLHSDLDPELLNEAK      | 122d | 18 |

|             |         |     |   |                             |      |    |
|-------------|---------|-----|---|-----------------------------|------|----|
| FBgn0002741 | 788.31  | 78  | 1 | LAEAEETIESLNQK              | 122d | 18 |
| FBgn0002741 | 537.22  | 45  | 1 | LDEAEANALK                  | 122d | 18 |
| FBgn0002741 | 1401.38 | 96  | 3 | LEAEKDELQAAL EEAEAALEQEENK  | 122d | 18 |
| FBgn0002741 | 1149.81 | 82  | 1 | LESELQTLHSDLDELLNEAK        | 122d | 18 |
| FBgn0002741 | 808.91  | 109 | 2 | LKVDDLAAELDASQK             | 122d | 18 |
| FBgn0002741 | 580.83  | 58  | 1 | LSIENSDLLR                  | 122d | 18 |
| FBgn0002741 | 693.39  | 51  | 1 | NEYYGQLNDLR                 | 122d | 18 |
| FBgn0002741 | 620.22  | 46  | 1 | NLEHDLNLR                   | 122d | 18 |
| FBgn0002741 | 883.77  | 86  | 2 | NLNDEIAHQDELINK             | 122d | 18 |
| FBgn0002741 | 986.53  | 34  | 1 | RLEAEKDELQAAL EEAEAALEQEENK | 122d | 18 |
| FBgn0002741 | 1216.77 | 108 | 3 | SKGSLEDQVVQTNPVLEAFGNAK     | 122d | 18 |
| FBgn0002741 | 567.88  | 48  | 1 | TALLDLSLGEK                 | 122d | 18 |
| FBgn0002741 | 609.99  | 70  | 1 | YQILNPAGIVGVDDPKK           | 122d | 18 |
| FBgn0002741 | 1139.19 | 71  | 3 | AEDMSNLTYLNDASVLHNL         | 132d | 18 |
| FBgn0002741 | 619.41  | 47  | 1 | AGVLGQMEEFR                 | 132d | 18 |
| FBgn0002741 | 945.31  | 102 | 2 | AKLEQTLDELEDSELR            | 132d | 18 |
| FBgn0002741 | 522.98  | 52  | 1 | AQLELSQVR                   | 132d | 18 |
| FBgn0002741 | 514.22  | 44  | 1 | ATDQTFSEK                   | 132d | 18 |
| FBgn0002741 | 666.79  | 65  | 2 | DIQTAL EEEQR                | 132d | 18 |
| FBgn0002741 | 977.39  | 85  | 2 | DLEEANIQHESTLANLR           | 132d | 18 |
| FBgn0002741 | 511.72  | 56  | 2 | EGYLLGEIK                   | 132d | 18 |
| FBgn0002741 | 653.96  | 60  | 2 | EQLNSLMTTLR                 | 132d | 18 |
| FBgn0002741 | 790.47  | 81  | 3 | GAYEEGQEQLAVR               | 132d | 18 |
| FBgn0002741 | 1109.14 | 92  | 2 | GSLEDQVVQTNPVLEAFGNAK       | 132d | 18 |
| FBgn0002741 | 956.49  | 92  | 2 | HNDAVAEMAEQVDQLNK           | 132d | 18 |
| FBgn0002741 | 777.08  | 67  | 1 | IQEKEEFENTR                 | 132d | 18 |
| FBgn0002741 | 703.35  | 82  | 1 | ISLTTQLEDTKR                | 132d | 18 |
| FBgn0002741 | 679.46  | 57  | 1 | KLEADINELEIALDHANK          | 132d | 18 |
| FBgn0002741 | 788.57  | 70  | 1 | LAEAEETIESLNQK              | 132d | 18 |
| FBgn0002741 | 537.87  | 64  | 2 | LDEAEANALK                  | 132d | 18 |
| FBgn0002741 | 955.24  | 57  | 1 | LEADINELEIALDHANK           | 132d | 18 |
| FBgn0002741 | 1401.39 | 56  | 1 | LEAEKDELQAAL EEAEAALEQEENK  | 132d | 18 |

|             |         |     |   |                          |      |    |
|-------------|---------|-----|---|--------------------------|------|----|
| FBgn0002741 | 586.97  | 63  | 1 | LEDEQVVVLK               | 132d | 18 |
| FBgn0002741 | 845.86  | 68  | 3 | LEQTLDELEDSLER           | 132d | 18 |
| FBgn0002741 | 580.85  | 70  | 3 | LSIENSDLLR               | 132d | 18 |
| FBgn0002741 | 623.38  | 80  | 2 | LTQEAVADLER              | 132d | 18 |
| FBgn0002741 | 466.89  | 40  | 1 | MMYPDFK                  | 132d | 18 |
| FBgn0002741 | 693.53  | 54  | 1 | NEYYGQLNDLR              | 132d | 18 |
| FBgn0002741 | 817.52  | 59  | 2 | NKDPLNDTVVDQFK           | 132d | 18 |
| FBgn0002741 | 884.09  | 66  | 1 | NLNDEIAHQDELINK          | 132d | 18 |
| FBgn0002741 | 766.89  | 100 | 1 | NVQQVTNSIGALCK           | 132d | 18 |
| FBgn0002741 | 788.86  | 85  | 1 | QLEEAESQVSQLSK           | 132d | 18 |
| FBgn0002741 | 713.47  | 36  | 2 | QLQHTLNEVQSK             | 132d | 18 |
| FBgn0002741 | 986.13  | 52  | 1 | RLEAEKDELQAALAEAALEQEENK | 132d | 18 |
| FBgn0002741 | 1139.16 | 63  | 1 | AEDMSNLTYLNDASVLHNL      | 142d | 18 |
| FBgn0002741 | 548.93  | 39  | 1 | AEELHAAEVK               | 142d | 18 |
| FBgn0002741 | 542.95  | 71  | 1 | AGVDHITNEK               | 142d | 18 |
| FBgn0002741 | 619.47  | 60  | 3 | AGVLGQMEEFR              | 142d | 18 |
| FBgn0002741 | 944.88  | 71  | 3 | AKLEQTLDELEDSL           | 142d | 18 |
| FBgn0002741 | 523.3   | 56  | 1 | ANAEAQVWR                | 142d | 18 |
| FBgn0002741 | 514.38  | 56  | 2 | ATDQTFSEK                | 142d | 18 |
| FBgn0002741 | 658.79  | 41  | 1 | DIEDLELNVQK              | 142d | 18 |
| FBgn0002741 | 546.76  | 41  | 1 | DKELSSITAK               | 142d | 18 |
| FBgn0002741 | 587.5   | 57  | 2 | DLLDQIGEGGR              | 142d | 18 |
| FBgn0002741 | 511.79  | 53  | 3 | EGYLLGEIK                | 142d | 18 |
| FBgn0002741 | 685.04  | 45  | 1 | ELSFQSEEDRK              | 142d | 18 |
| FBgn0002741 | 654.06  | 61  | 5 | EQLNSLMTTLR              | 142d | 18 |
| FBgn0002741 | 540.81  | 46  | 1 | GALQDYQER                | 142d | 18 |
| FBgn0002741 | 790.56  | 67  | 1 | GAYEEGQEQLAVR            | 142d | 18 |
| FBgn0002741 | 1109.27 | 111 | 2 | GSLEDQVVQTNPVLEAFGNAK    | 142d | 18 |
| FBgn0002741 | 956.98  | 100 | 2 | HNDAVAEMAEQVDQLNK        | 142d | 18 |
| FBgn0002741 | 776.81  | 59  | 2 | IQEKEEFENTR              | 142d | 18 |
| FBgn0002741 | 1019.05 | 40  | 1 | KLEADINELEIALDHANK       | 142d | 18 |
| FBgn0002741 | 1213.79 | 61  | 2 | KLESELQTLHSDLDLLEAK      | 142d | 18 |



|             |         |    |   |                             |      |    |
|-------------|---------|----|---|-----------------------------|------|----|
| FBgn0002741 | 788.63  | 94 | 3 | LAEAEETIESLNQK              | 142d | 18 |
| FBgn0002741 | 538.02  | 64 | 2 | LDEAEANALK                  | 142d | 18 |
| FBgn0002741 | 955.13  | 44 | 1 | LEADINELEIALDHANK           | 142d | 18 |
| FBgn0002741 | 934.06  | 57 | 2 | LEAEKDELQAAL EEAEAALEQEENK  | 142d | 18 |
| FBgn0002741 | 586.94  | 68 | 1 | LEDEQVVVLK                  | 142d | 18 |
| FBgn0002741 | 845.81  | 37 | 2 | LEQTLDELEDSL ER             | 142d | 18 |
| FBgn0002741 | 1149.64 | 57 | 1 | LESELQTLHSDLDELLNEAK        | 142d | 18 |
| FBgn0002741 | 808.65  | 84 | 2 | LKVDDLAAELDASQK             | 142d | 18 |
| FBgn0002741 | 581.04  | 66 | 1 | LSIENSDLLR                  | 142d | 18 |
| FBgn0002741 | 481.93  | 48 | 1 | LTQEEDAR                    | 142d | 18 |
| FBgn0002741 | 817     | 39 | 1 | NKDPLNDTVVDQFK              | 142d | 18 |
| FBgn0002741 | 620.35  | 46 | 2 | NLEHDLNLR                   | 142d | 18 |
| FBgn0002741 | 883.92  | 69 | 1 | NLNDEIAHQDELINK             | 142d | 18 |
| FBgn0002741 | 951.87  | 39 | 2 | QAEQELADAHEQLNEVSAQNASISAAK | 142d | 18 |
| FBgn0002741 | 713.57  | 36 | 2 | QLQHTLNEVQSK                | 142d | 18 |
| FBgn0002741 | 986.59  | 73 | 1 | RLEAEKDELQAAL EEAEAALEQEENK | 142d | 18 |
| FBgn0002741 | 1216.65 | 89 | 1 | SKGSLEDQVVQTNPVLEAFGNAK     | 142d | 18 |
| FBgn0002741 | 449.38  | 37 | 1 | YESDGVAR                    | 142d | 18 |
| FBgn0002741 | 850.28  | 78 | 1 | YQILNPAGIVGVDDPK            | 142d | 18 |
| FBgn0002741 | 914.59  | 44 | 1 | YQILNPAGIVGVDDPKK           | 142d | 18 |
| FBgn0002741 | 523.55  | 63 | 4 | ADLAEQAISK                  | 2d   | 28 |
| FBgn0002741 | 1139.08 | 82 | 5 | AEDMSNLTYLNDASVLHNLR        | 2d   | 28 |
| FBgn0002741 | 619.44  | 61 | 2 | AGVLGQMEEFR                 | 2d   | 28 |
| FBgn0002741 | 546.65  | 41 | 2 | AGVLGQMEEFRDER              | 2d   | 28 |
| FBgn0002741 | 945.14  | 96 | 3 | AKLEQTLDELEDSL ER           | 2d   | 28 |
| FBgn0002741 | 523.31  | 62 | 2 | ANAEAQVWR                   | 2d   | 28 |
| FBgn0002741 | 688.05  | 61 | 3 | ANALQNELEESR                | 2d   | 28 |
| FBgn0002741 | 522.65  | 62 | 3 | AQLELSQVR                   | 2d   | 28 |
| FBgn0002741 | 514.19  | 51 | 3 | ATDQTFSEK                   | 2d   | 28 |
| FBgn0002741 | 667.06  | 62 | 1 | DIQTALEEEQR                 | 2d   | 28 |
| FBgn0002741 | 546.74  | 49 | 2 | DKELSSITAK                  | 2d   | 28 |
| FBgn0002741 | 977.5   | 74 | 3 | DLEEANIQHESTLANLR           | 2d   | 28 |

|             |         |     |   |                         |    |    |
|-------------|---------|-----|---|-------------------------|----|----|
| FBgn0002741 | 586.98  | 58  | 3 | DLLDQIGEGGR             | 2d | 28 |
| FBgn0002741 | 576.48  | 65  | 3 | DLLQQVNPCK              | 2d | 28 |
| FBgn0002741 | 511.58  | 56  | 3 | EGYLLGEIK               | 2d | 28 |
| FBgn0002741 | 684.84  | 69  | 3 | ELSFQSEEDRK             | 2d | 28 |
| FBgn0002741 | 653.75  | 54  | 3 | EQLNSLMTTLR             | 2d | 28 |
| FBgn0002741 | 541.65  | 43  | 1 | FDLAPENEF               | 2d | 28 |
| FBgn0002741 | 540.63  | 56  | 3 | GALQDYQER               | 2d | 28 |
| FBgn0002741 | 790.23  | 83  | 4 | GAYEEGQEQLAVR           | 2d | 28 |
| FBgn0002741 | 573.11  | 53  | 3 | GGGFATVSSAYK            | 2d | 28 |
| FBgn0002741 | 739.76  | 108 | 3 | GSLEDQVVQTNPVLEAFGNAK   | 2d | 28 |
| FBgn0002741 | 638.39  | 54  | 2 | HNDAVAEMAEQVDQLNK       | 2d | 28 |
| FBgn0002741 | 776.7   | 76  | 3 | IQEKEEFENTR             | 2d | 28 |
| FBgn0002741 | 703.2   | 68  | 3 | ISLTTQLEDTKR            | 2d | 28 |
| FBgn0002741 | 1213.82 | 74  | 1 | KLESELQTLHSDLDELLNEAK   | 2d | 28 |
| FBgn0002741 | 788.34  | 104 | 3 | LAEAEETIESLNQK          | 2d | 28 |
| FBgn0002741 | 537.71  | 63  | 4 | LDEAEANALK              | 2d | 28 |
| FBgn0002741 | 954.95  | 78  | 1 | LEADINELEIALDHANK       | 2d | 28 |
| FBgn0002741 | 1401.2  | 54  | 2 | LEAEKDELQAALAEAALEQEENK | 2d | 28 |
| FBgn0002741 | 586.62  | 80  | 3 | LEDEQVVVLK              | 2d | 28 |
| FBgn0002741 | 816.35  | 88  | 3 | LEEAGGATSAQIELNK        | 2d | 28 |
| FBgn0002741 | 845.85  | 54  | 3 | LEQTLDELEDSLRL          | 2d | 28 |
| FBgn0002741 | 766.77  | 49  | 2 | LESELQTLHSDLDELLNEAK    | 2d | 28 |
| FBgn0002741 | 809.04  | 86  | 2 | LKVDDLAELDASQK          | 2d | 28 |
| FBgn0002741 | 580.66  | 69  | 3 | LSIENSDLLR              | 2d | 28 |
| FBgn0002741 | 823.8   | 94  | 3 | LSTEVEDLQLEVDR          | 2d | 28 |
| FBgn0002741 | 623.17  | 77  | 6 | LTQEAVADLER             | 2d | 28 |
| FBgn0002741 | 481.66  | 49  | 2 | LTQEEDAR                | 2d | 28 |
| FBgn0002741 | 502     | 52  | 2 | NDLENQLR                | 2d | 28 |
| FBgn0002741 | 693.3   | 59  | 3 | NEYYGQLNDLR             | 2d | 28 |
| FBgn0002741 | 817.35  | 70  | 3 | NKDPLNDTVVDQFK          | 2d | 28 |
| FBgn0002741 | 884.05  | 73  | 3 | NLNDEIAHQDELINK         | 2d | 28 |
| FBgn0002741 | 515.74  | 38  | 1 | NYSTELFR                | 2d | 28 |

|             |         |    |   |                             |     |    |
|-------------|---------|----|---|-----------------------------|-----|----|
| FBgn0002741 | 1427.28 | 52 | 2 | QAEQELADAHEQLNEVSAQNASISAAK | 2d  | 28 |
| FBgn0002741 | 788.99  | 78 | 2 | QLEEAESQVSQLSK              | 2d  | 28 |
| FBgn0002741 | 713.16  | 53 | 2 | QLQHTLNEVQSK                | 2d  | 28 |
| FBgn0002741 | 986.57  | 77 | 1 | RLEAEKDELQAALAEAALAEQEENK   | 2d  | 28 |
| FBgn0002741 | 1216.47 | 89 | 2 | SKGSLEDQVVQTNPVLEAFGNAK     | 2d  | 28 |
| FBgn0002741 | 567.76  | 55 | 3 | TALLDSLSGEK                 | 2d  | 28 |
| FBgn0002741 | 570.32  | 47 | 1 | TLNDFDASKK                  | 2d  | 28 |
| FBgn0002741 | 688.3   | 85 | 2 | VDDLAAELDASQK               | 2d  | 28 |
| FBgn0002741 | 449.02  | 43 | 1 | YESDGVAR                    | 2d  | 28 |
| FBgn0002741 | 850.57  | 87 | 2 | YQILNPAGIVGVDDPK            | 2d  | 28 |
| FBgn0002741 | 914.28  | 90 | 5 | YQILNPAGIVGVDDPKK           | 2d  | 28 |
| FBgn0002741 | 523.51  | 67 | 1 | ADLAEQAISK                  | 12d | 28 |
| FBgn0002741 | 1139.28 | 81 | 6 | AEDMSNLTYLNDASVLHNLRL       | 12d | 28 |
| FBgn0002741 | 619.49  | 63 | 3 | AGVLGQMEEFR                 | 12d | 28 |
| FBgn0002741 | 945.6   | 98 | 3 | AKLEQTLDELEDSLRL            | 12d | 28 |
| FBgn0002741 | 732.65  | 40 | 1 | ALDSMQASLEAEAK              | 12d | 28 |
| FBgn0002741 | 523.16  | 65 | 3 | ANAEAQVWR                   | 12d | 28 |
| FBgn0002741 | 687.93  | 61 | 2 | ANALQNELEESR                | 12d | 28 |
| FBgn0002741 | 514.33  | 50 | 1 | ATDQTFSEK                   | 12d | 28 |
| FBgn0002741 | 666.96  | 63 | 3 | DIQTALEEEQR                 | 12d | 28 |
| FBgn0002741 | 546.74  | 46 | 2 | DKELSSITAK                  | 12d | 28 |
| FBgn0002741 | 977.3   | 83 | 3 | DLEEANIQHESTLANLR           | 12d | 28 |
| FBgn0002741 | 587.18  | 59 | 3 | DLLDQIGEGGR                 | 12d | 28 |
| FBgn0002741 | 787.04  | 70 | 3 | DLLQQVNPVKYEK               | 12d | 28 |
| FBgn0002741 | 511.74  | 53 | 3 | EGYLLGEIK                   | 12d | 28 |
| FBgn0002741 | 684.73  | 63 | 2 | ELSFQSEEDRK                 | 12d | 28 |
| FBgn0002741 | 653.41  | 61 | 4 | EQLNSLMTTLR                 | 12d | 28 |
| FBgn0002741 | 540.51  | 52 | 3 | GALQDYQER                   | 12d | 28 |
| FBgn0002741 | 790.58  | 84 | 5 | GAYEEGQEQLAVR               | 12d | 28 |
| FBgn0002741 | 579.38  | 37 | 1 | GAYEEGQEQLAVRR              | 12d | 28 |
| FBgn0002741 | 573.4   | 50 | 1 | GGGFATVSSAYK                | 12d | 28 |
| FBgn0002741 | 1108.81 | 94 | 2 | GSLEDQVVQTNPVLEAFGNAK       | 12d | 28 |

|             |         |     |   |                                      |     |    |
|-------------|---------|-----|---|--------------------------------------|-----|----|
| FBgn0002741 | 956.8   | 121 | 2 | HNDVAEMAEQVDQLNK                     | 12d | 28 |
| FBgn0002741 | 703.53  | 57  | 1 | ISLTTQLEDTKR                         | 12d | 28 |
| FBgn0002741 | 1213.69 | 75  | 1 | KLESELQTLHSDLDELLNEAK                | 12d | 28 |
| FBgn0002741 | 788.36  | 114 | 3 | LAEAEETIESLNQK                       | 12d | 28 |
| FBgn0002741 | 537.51  | 63  | 2 | LDEAEANALK                           | 12d | 28 |
| FBgn0002741 | 1401.13 | 74  | 4 | LEAEKDELQAALAEAEAALEQEENK            | 12d | 28 |
| FBgn0002741 | 586.8   | 75  | 3 | LEDEQVVVLK                           | 12d | 28 |
| FBgn0002741 | 816.29  | 112 | 2 | LEEAGGATSAQIELNK                     | 12d | 28 |
| FBgn0002741 | 845.77  | 76  | 2 | LEQTLDELEDSESLER                     | 12d | 28 |
| FBgn0002741 | 1149.47 | 54  | 2 | LESELQTLHSDLDELLNEAK                 | 12d | 28 |
| FBgn0002741 | 808.88  | 93  | 3 | LKVDDLAELDASQK                       | 12d | 28 |
| FBgn0002741 | 823.93  | 68  | 2 | LSTEVEDLQLEVDR                       | 12d | 28 |
| FBgn0002741 | 623.47  | 75  | 5 | LTQEAVADLER                          | 12d | 28 |
| FBgn0002741 | 1305.47 | 76  | 2 | NEVPPHIFAISDGAYVDMLTNHVNQSMITGESGAGK | 12d | 28 |
| FBgn0002741 | 693.38  | 63  | 2 | NEYYGQLNDLR                          | 12d | 28 |
| FBgn0002741 | 817.23  | 73  | 3 | NKDPLNDTVVDQFK                       | 12d | 28 |
| FBgn0002741 | 972.08  | 69  | 1 | NLADEVKDLLDQIGEGGR                   | 12d | 28 |
| FBgn0002741 | 883.95  | 78  | 1 | NLNDEIAHQDELINK                      | 12d | 28 |
| FBgn0002741 | 515.98  | 36  | 2 | NYSTELFR                             | 12d | 28 |
| FBgn0002741 | 951.85  | 52  | 1 | QAEQELADAHEQLNEVSAQNASISAAK          | 12d | 28 |
| FBgn0002741 | 788.86  | 100 | 2 | QLEEAESQVSQLSK                       | 12d | 28 |
| FBgn0002741 | 713.35  | 74  | 3 | QLQHTLNEVQSK                         | 12d | 28 |
| FBgn0002741 | 986.48  | 91  | 2 | RLEAEKDELQAALAEAEAALEQEENK           | 12d | 28 |
| FBgn0002741 | 1216.54 | 86  | 2 | SKGSLEDQVVQTNPVLEAFGNAK              | 12d | 28 |
| FBgn0002741 | 567.77  | 51  | 1 | TALLDLSLGEK                          | 12d | 28 |
| FBgn0002741 | 570.47  | 43  | 3 | TLNDFDASKK                           | 12d | 28 |
| FBgn0002741 | 530.55  | 52  | 3 | VISQQSLER                            | 12d | 28 |
| FBgn0002741 | 850.53  | 83  | 2 | YQILNPAGIVGVDDPK                     | 12d | 28 |
| FBgn0002741 | 914.47  | 100 | 3 | YQILNPAGIVGVDDPKK                    | 12d | 28 |
| FBgn0002741 | 1139.02 | 72  | 2 | AEDMSNLTYLNDASVLHNL                  | 22d | 28 |
| FBgn0002741 | 542.71  | 61  | 3 | AGVDHITNEK                           | 22d | 28 |
| FBgn0002741 | 619.26  | 62  | 2 | AGVLGQMEEFR                          | 22d | 28 |

|             |         |     |   |                           |     |    |
|-------------|---------|-----|---|---------------------------|-----|----|
| FBgn0002741 | 945.61  | 77  | 2 | AKLEQTLDELEDSLER          | 22d | 28 |
| FBgn0002741 | 522.9   | 61  | 1 | ANAEAQVWR                 | 22d | 28 |
| FBgn0002741 | 687.84  | 67  | 3 | ANALQNELEESR              | 22d | 28 |
| FBgn0002741 | 666.78  | 67  | 3 | DIQTALEEEQR               | 22d | 28 |
| FBgn0002741 | 546.73  | 36  | 1 | DKELSSITAK                | 22d | 28 |
| FBgn0002741 | 977.56  | 61  | 2 | DLEEANIQHESLANLR          | 22d | 28 |
| FBgn0002741 | 587.28  | 59  | 3 | DLLDQIGEGGR               | 22d | 28 |
| FBgn0002741 | 511.53  | 58  | 3 | EGYLLGEIK                 | 22d | 28 |
| FBgn0002741 | 821.64  | 76  | 2 | EKNEYYGQLNDLR             | 22d | 28 |
| FBgn0002741 | 684.66  | 69  | 3 | ELSFQSEEDRK               | 22d | 28 |
| FBgn0002741 | 540.72  | 55  | 1 | GALQDYQER                 | 22d | 28 |
| FBgn0002741 | 1108.97 | 69  | 2 | GSLEDQVVQTNPVLEAFGNAK     | 22d | 28 |
| FBgn0002741 | 638.33  | 60  | 2 | HNDAVAEMAEQVDQLNK         | 22d | 28 |
| FBgn0002741 | 776.69  | 63  | 2 | IQEKEEFENTR               | 22d | 28 |
| FBgn0002741 | 703.19  | 69  | 2 | ISLTTQLEDTKR              | 22d | 28 |
| FBgn0002741 | 679.85  | 54  | 3 | KLEADINELEIALDHANK        | 22d | 28 |
| FBgn0002741 | 809.56  | 58  | 1 | KLESELQTLHSDLDELLNEAK     | 22d | 28 |
| FBgn0002741 | 788.47  | 78  | 2 | LAEAEETIESLNQK            | 22d | 28 |
| FBgn0002741 | 934.62  | 69  | 3 | LEAEKDELQAALAEAEAALEQEENK | 22d | 28 |
| FBgn0002741 | 586.76  | 75  | 1 | LEDEQVVVLK                | 22d | 28 |
| FBgn0002741 | 845.71  | 64  | 2 | LEQTLDELEDSLER            | 22d | 28 |
| FBgn0002741 | 766.76  | 47  | 3 | LESELQTLHSDLDELLNEAK      | 22d | 28 |
| FBgn0002741 | 808.86  | 101 | 1 | LKVDDLAAELDASQK           | 22d | 28 |
| FBgn0002741 | 580.77  | 63  | 2 | LSIENSDLLR                | 22d | 28 |
| FBgn0002741 | 623.23  | 77  | 4 | LTQEAVADLER               | 22d | 28 |
| FBgn0002741 | 466.4   | 34  | 1 | MMYPDFK                   | 22d | 28 |
| FBgn0002741 | 693.17  | 64  | 3 | NEYYGQLNDLR               | 22d | 28 |
| FBgn0002741 | 817.55  | 47  | 1 | NKDPLNDTVVDQFK            | 22d | 28 |
| FBgn0002741 | 648.45  | 43  | 2 | NLADEVKDLLDQIGEGGR        | 22d | 28 |
| FBgn0002741 | 620.21  | 41  | 1 | NLEHDLNLR                 | 22d | 28 |
| FBgn0002741 | 883.75  | 80  | 3 | NLNDEIAHQDELINK           | 22d | 28 |
| FBgn0002741 | 515.85  | 39  | 1 | NYSTELFR                  | 22d | 28 |

|             |         |     |   |                             |     |    |
|-------------|---------|-----|---|-----------------------------|-----|----|
| FBgn0002741 | 741.69  | 62  | 2 | QAEQELADAHEQL               | 22d | 28 |
| FBgn0002741 | 951.84  | 68  | 1 | QAEQELADAHEQLNEVSAQNASISAAK | 22d | 28 |
| FBgn0002741 | 788.87  | 81  | 1 | QLEEAESQVSQLSK              | 22d | 28 |
| FBgn0002741 | 713.28  | 58  | 3 | QLQHTLNEVQSK                | 22d | 28 |
| FBgn0002741 | 1479.19 | 43  | 1 | RLEAEKDELQAALAEAALAEQEENK   | 22d | 28 |
| FBgn0002741 | 1216.71 | 76  | 3 | SKGSLEDQVVQTNPVLEAFGNAK     | 22d | 28 |
| FBgn0002741 | 850.51  | 82  | 3 | YQILNPAGIVGVDDPK            | 22d | 28 |
| FBgn0002741 | 610.03  | 93  | 2 | YQILNPAGIVGVDDPKK           | 22d | 28 |
| FBgn0002741 | 1139.14 | 70  | 1 | AEDMSNLTYLNDASVLHNL         | 32d | 28 |
| FBgn0002741 | 542.62  | 68  | 1 | AGVDHITNEK                  | 32d | 28 |
| FBgn0002741 | 619.36  | 51  | 1 | AGVLGQMEEFR                 | 32d | 28 |
| FBgn0002741 | 945.6   | 102 | 3 | AKLEQTLDELEDSL              | 32d | 28 |
| FBgn0002741 | 732.93  | 98  | 3 | ALDSMQASLEAEAK              | 32d | 28 |
| FBgn0002741 | 523.21  | 63  | 3 | ANAEAQVWR                   | 32d | 28 |
| FBgn0002741 | 687.93  | 66  | 2 | ANALQNELEESR                | 32d | 28 |
| FBgn0002741 | 523.01  | 61  | 3 | AQLELSQVR                   | 32d | 28 |
| FBgn0002741 | 977.46  | 89  | 6 | DLEEANIQHESTLANLR           | 32d | 28 |
| FBgn0002741 | 511.75  | 56  | 2 | EGYLLGEIK                   | 32d | 28 |
| FBgn0002741 | 821.73  | 68  | 3 | EKNEYYGQLNDR                | 32d | 28 |
| FBgn0002741 | 666.88  | 62  | 2 | ELENELDGEQR                 | 32d | 28 |
| FBgn0002741 | 653.75  | 86  | 2 | EQLNSLMTTLR                 | 32d | 28 |
| FBgn0002741 | 541.59  | 44  | 1 | FDLAPENEF                   | 32d | 28 |
| FBgn0002741 | 540.8   | 51  | 3 | GALQDYQER                   | 32d | 28 |
| FBgn0002741 | 790.14  | 81  | 5 | GAYEEGQEQLEAVR              | 32d | 28 |
| FBgn0002741 | 1109    | 94  | 3 | GSLEDQVVQTNPVLEAFGNAK       | 32d | 28 |
| FBgn0002741 | 956.88  | 131 | 3 | HNDAVAEMAEQVDQLNK           | 32d | 28 |
| FBgn0002741 | 776.8   | 67  | 2 | IQEKEEFENTR                 | 32d | 28 |
| FBgn0002741 | 703.26  | 60  | 3 | ISLTTQLEDTKR                | 32d | 28 |
| FBgn0002741 | 1018.89 | 89  | 1 | KLEADINELEIALDHANK          | 32d | 28 |
| FBgn0002741 | 809.14  | 64  | 1 | KLESELQTLHSDLDLLEAK         | 32d | 28 |
| FBgn0002741 | 788.26  | 94  | 3 | LAEAETIESLNQK               | 32d | 28 |
| FBgn0002741 | 537.87  | 64  | 2 | LDEAEANALK                  | 32d | 28 |

|             |         |    |   |                             |     |    |
|-------------|---------|----|---|-----------------------------|-----|----|
| FBgn0002741 | 934.54  | 45 | 1 | LEAEKDELQAAL EEAEAALEQEENK  | 32d | 28 |
| FBgn0002741 | 586.72  | 75 | 3 | LEDEQVVVLK                  | 32d | 28 |
| FBgn0002741 | 845.99  | 43 | 3 | LEQTLDELEDSL ER             | 32d | 28 |
| FBgn0002741 | 808.76  | 96 | 3 | LKVDDLAAELDASQK             | 32d | 28 |
| FBgn0002741 | 581     | 62 | 1 | LSIENSDLLR                  | 32d | 28 |
| FBgn0002741 | 824.08  | 68 | 2 | LSTEVEDLQLEVD R             | 32d | 28 |
| FBgn0002741 | 623.3   | 70 | 2 | LTQEAVADLER                 | 32d | 28 |
| FBgn0002741 | 693.56  | 64 | 2 | NEYYGQLNDLR                 | 32d | 28 |
| FBgn0002741 | 817.41  | 90 | 3 | NKDPLNDTVVDQFK              | 32d | 28 |
| FBgn0002741 | 620.22  | 55 | 1 | NLEHDLNLR                   | 32d | 28 |
| FBgn0002741 | 883.76  | 74 | 3 | NLNDEIAHQDELINK             | 32d | 28 |
| FBgn0002741 | 515.62  | 36 | 1 | NYSTELFR                    | 32d | 28 |
| FBgn0002741 | 951.96  | 62 | 1 | QAEQELADAHEQLNEVSAQNASISAAK | 32d | 28 |
| FBgn0002741 | 713.32  | 62 | 1 | QLQH TLNEVQSK               | 32d | 28 |
| FBgn0002741 | 986.47  | 72 | 1 | RLEAEKDELQAAL EEAEAALEQEENK | 32d | 28 |
| FBgn0002741 | 1216.72 | 81 | 2 | SKGSLEDQVVQTPNVLEAFGNAK     | 32d | 28 |
| FBgn0002741 | 473.58  | 41 | 1 | TLLEQADR                    | 32d | 28 |
| FBgn0002741 | 688.18  | 92 | 2 | VDDLAAELDASQK               | 32d | 28 |
| FBgn0002741 | 530.78  | 52 | 2 | VISQQSLER                   | 32d | 28 |
| FBgn0002741 | 850.69  | 64 | 2 | YQILNPAGIVGVDDPK            | 32d | 28 |
| FBgn0002741 | 914.14  | 62 | 2 | YQILNPAGIVGVDDPKK           | 32d | 28 |
| FBgn0002741 | 759.86  | 59 | 1 | AEDMSNLTYLNDASVLHNLR        | 36d | 28 |
| FBgn0002741 | 542.57  | 58 | 2 | AGVDHITNEK                  | 36d | 28 |
| FBgn0002741 | 619.21  | 65 | 1 | AGVLGQMEEFR                 | 36d | 28 |
| FBgn0002741 | 945.6   | 75 | 3 | AKLEQTLDELEDSL ER           | 36d | 28 |
| FBgn0002741 | 732.81  | 89 | 3 | ALDSMQASLEAEAK              | 36d | 28 |
| FBgn0002741 | 523.19  | 58 | 2 | ANAEAQVWR                   | 36d | 28 |
| FBgn0002741 | 487.08  | 39 | 1 | ANAIANA AEK                 | 36d | 28 |
| FBgn0002741 | 514.13  | 37 | 1 | ATDQTFSEK                   | 36d | 28 |
| FBgn0002741 | 667.05  | 67 | 2 | DIQTAL EEEQR                | 36d | 28 |
| FBgn0002741 | 546.53  | 41 | 3 | DKELSSITAK                  | 36d | 28 |
| FBgn0002741 | 977.7   | 85 | 5 | DLEEANIQHESTLANLR           | 36d | 28 |

|             |         |     |   |                           |     |    |
|-------------|---------|-----|---|---------------------------|-----|----|
| FBgn0002741 | 587.5   | 58  | 3 | DLLDQIGEGGR               | 36d | 28 |
| FBgn0002741 | 511.66  | 62  | 3 | EGYLLGEIK                 | 36d | 28 |
| FBgn0002741 | 821.52  | 63  | 3 | EKNEYYGQLNDLR             | 36d | 28 |
| FBgn0002741 | 684.56  | 67  | 2 | ELSFQSEEDRK               | 36d | 28 |
| FBgn0002741 | 653.62  | 64  | 2 | EQLNSLMTTLR               | 36d | 28 |
| FBgn0002741 | 540.68  | 49  | 3 | GALQDYQER                 | 36d | 28 |
| FBgn0002741 | 790.29  | 86  | 5 | GAYEEGQEQLEAVR            | 36d | 28 |
| FBgn0002741 | 573.18  | 52  | 2 | GGGFATVSSAYK              | 36d | 28 |
| FBgn0002741 | 1108.87 | 85  | 2 | GSLEDQVVQTNPVLEAFGNAK     | 36d | 28 |
| FBgn0002741 | 956.91  | 121 | 3 | HNDAVAEMAEQVDQLNK         | 36d | 28 |
| FBgn0002741 | 738.52  | 90  | 1 | IEELEEEVEAER              | 36d | 28 |
| FBgn0002741 | 776.67  | 59  | 1 | IQEKEEFENTR               | 36d | 28 |
| FBgn0002741 | 703.39  | 58  | 2 | ISLTTQLEDTKR              | 36d | 28 |
| FBgn0002741 | 545.03  | 48  | 2 | KADQEISGLK                | 36d | 28 |
| FBgn0002741 | 1019    | 99  | 3 | KLEADINELEIALDHANK        | 36d | 28 |
| FBgn0002741 | 1213.58 | 63  | 1 | KLESELQTLHSDLDELLNEAK     | 36d | 28 |
| FBgn0002741 | 788.23  | 95  | 3 | LAEAEETIESLNQK            | 36d | 28 |
| FBgn0002741 | 637.08  | 46  | 1 | LEADINELEIALDHANK         | 36d | 28 |
| FBgn0002741 | 1401.25 | 35  | 1 | LEAEKDELQAALAEAEAALEQEENK | 36d | 28 |
| FBgn0002741 | 586.84  | 69  | 2 | LEDEQVVVLK                | 36d | 28 |
| FBgn0002741 | 816.28  | 92  | 3 | LEEAGGATSAQIELNK          | 36d | 28 |
| FBgn0002741 | 846.03  | 57  | 3 | LEQTLDELEDSELR            | 36d | 28 |
| FBgn0002741 | 766.75  | 46  | 1 | LESELQTLHSDLDELLNEAK      | 36d | 28 |
| FBgn0002741 | 808.84  | 106 | 3 | LKVDDLAELDASQK            | 36d | 28 |
| FBgn0002741 | 581.06  | 66  | 2 | LSIENSDLLR                | 36d | 28 |
| FBgn0002741 | 824.07  | 69  | 1 | LSTEVEDLQLEVDR            | 36d | 28 |
| FBgn0002741 | 623.45  | 77  | 3 | LTQEAVADLER               | 36d | 28 |
| FBgn0002741 | 501.86  | 52  | 1 | NDLENQLR                  | 36d | 28 |
| FBgn0002741 | 693.33  | 54  | 2 | NEYYGQLNDLR               | 36d | 28 |
| FBgn0002741 | 817.52  | 67  | 2 | NKDPLNDTVVDQFK            | 36d | 28 |
| FBgn0002741 | 620.19  | 44  | 2 | NLEHDLNLR                 | 36d | 28 |
| FBgn0002741 | 883.84  | 79  | 3 | NLNDEIAHQDELINK           | 36d | 28 |



|             |         |     |   |                            |     |    |
|-------------|---------|-----|---|----------------------------|-----|----|
| FBgn0002741 | 515.66  | 41  | 1 | NYSTELFR                   | 36d | 28 |
| FBgn0002741 | 788.76  | 83  | 1 | QLEEAESQVSQLSK             | 36d | 28 |
| FBgn0002741 | 713.3   | 52  | 3 | QLQHTLNEVQSK               | 36d | 28 |
| FBgn0002741 | 986.13  | 44  | 1 | RLEAEKDELQAALAEAEAALEQEENK | 36d | 28 |
| FBgn0002741 | 1216.45 | 75  | 1 | SKGSLEDQVVQTPNVLEAFGNAK    | 36d | 28 |
| FBgn0002741 | 567.9   | 50  | 3 | TALLDSLSGEK                | 36d | 28 |
| FBgn0002741 | 688.12  | 79  | 2 | VDDLAAELDASQK              | 36d | 28 |
| FBgn0002741 | 530.68  | 59  | 1 | VISQQSLER                  | 36d | 28 |
| FBgn0002741 | 850.34  | 65  | 2 | YQILNPAGIVGVDDPK           | 36d | 28 |
| FBgn0002741 | 610.13  | 59  | 1 | YQILNPAGIVGVDDPKK          | 36d | 28 |
| FBgn0002741 | 523.76  | 47  | 2 | ADLAEQAISK                 | 42d | 28 |
| FBgn0002741 | 759.7   | 97  | 3 | AEDMSNLTYLNDASVLHNL        | 42d | 28 |
| FBgn0002741 | 542.62  | 64  | 3 | AGVDHITNEK                 | 42d | 28 |
| FBgn0002741 | 619.17  | 58  | 2 | AGVLGQMEEFR                | 42d | 28 |
| FBgn0002741 | 945.38  | 96  | 3 | AKLEQTLDELEDSL             | 42d | 28 |
| FBgn0002741 | 732.76  | 100 | 3 | ALDSMQASLEAEAK             | 42d | 28 |
| FBgn0002741 | 523.41  | 57  | 3 | ANAEAQVWR                  | 42d | 28 |
| FBgn0002741 | 487.17  | 45  | 1 | ANAIANAAEK                 | 42d | 28 |
| FBgn0002741 | 687.66  | 72  | 3 | ANALQNELEESR               | 42d | 28 |
| FBgn0002741 | 522.61  | 59  | 3 | AQLELSQVR                  | 42d | 28 |
| FBgn0002741 | 514.03  | 63  | 3 | ATDQTFSEK                  | 42d | 28 |
| FBgn0002741 | 666.99  | 71  | 3 | DIQTALEEEQR                | 42d | 28 |
| FBgn0002741 | 546.9   | 39  | 3 | DKELSSITAK                 | 42d | 28 |
| FBgn0002741 | 977.38  | 97  | 6 | DLEEANIQHESTLANLR          | 42d | 28 |
| FBgn0002741 | 511.71  | 43  | 2 | EGYLLGEIK                  | 42d | 28 |
| FBgn0002741 | 821.61  | 61  | 3 | EKNEYYGQLNDLR              | 42d | 28 |
| FBgn0002741 | 666.76  | 57  | 1 | ELENELDGEQR                | 42d | 28 |
| FBgn0002741 | 684.87  | 55  | 1 | ELSFQSEEDRK                | 42d | 28 |
| FBgn0002741 | 653.54  | 36  | 1 | EQLNSLMTTLR                | 42d | 28 |
| FBgn0002741 | 540.69  | 47  | 2 | GALQDYQER                  | 42d | 28 |
| FBgn0002741 | 790.43  | 81  | 4 | GAYEEGQEQLEAVR             | 42d | 28 |
| FBgn0002741 | 573.35  | 51  | 1 | GGGFATVSSAYK               | 42d | 28 |

|             |         |     |   |                             |     |    |
|-------------|---------|-----|---|-----------------------------|-----|----|
| FBgn0002741 | 1108.86 | 104 | 2 | GSLEDQVVQTNPVLEAFGNAK       | 42d | 28 |
| FBgn0002741 | 956.89  | 126 | 2 | HNDAVAEMAEQVDQLNK           | 42d | 28 |
| FBgn0002741 | 738.3   | 83  | 2 | IEELEEVEAER                 | 42d | 28 |
| FBgn0002741 | 776.72  | 63  | 1 | IQEKEEFENTR                 | 42d | 28 |
| FBgn0002741 | 703.21  | 77  | 3 | ISLTTQLEDTKR                | 42d | 28 |
| FBgn0002741 | 545.08  | 41  | 1 | KADQEISGLK                  | 42d | 28 |
| FBgn0002741 | 1019.27 | 90  | 1 | KLEADINELEIALDHANK          | 42d | 28 |
| FBgn0002741 | 1213.72 | 69  | 2 | KLESELQTLHSDLDELLNEAK       | 42d | 28 |
| FBgn0002741 | 788.45  | 108 | 3 | LAEAEETIESLNQK              | 42d | 28 |
| FBgn0002741 | 537.8   | 66  | 2 | LDEAEANALK                  | 42d | 28 |
| FBgn0002741 | 955.07  | 56  | 2 | LEADINELEIALDHANK           | 42d | 28 |
| FBgn0002741 | 1401.28 | 80  | 4 | LEAEKDELQAALAEAEAALEQEENK   | 42d | 28 |
| FBgn0002741 | 586.64  | 75  | 1 | LEDEQVVVLK                  | 42d | 28 |
| FBgn0002741 | 816.16  | 104 | 3 | LEEAGGATSAQIELNK            | 42d | 28 |
| FBgn0002741 | 845.96  | 88  | 2 | LEQTLDELEDSLK               | 42d | 28 |
| FBgn0002741 | 808.96  | 94  | 3 | LKVDDLAAELDASQK             | 42d | 28 |
| FBgn0002741 | 580.7   | 75  | 3 | LSIENSDLLR                  | 42d | 28 |
| FBgn0002741 | 823.91  | 64  | 2 | LSTEVEDLQLEVDR              | 42d | 28 |
| FBgn0002741 | 442.74  | 46  | 4 | LTNTHLGK                    | 42d | 28 |
| FBgn0002741 | 623.32  | 74  | 5 | LTQEAVADLER                 | 42d | 28 |
| FBgn0002741 | 693.25  | 64  | 2 | NEYYGQLNDLR                 | 42d | 28 |
| FBgn0002741 | 817.18  | 46  | 1 | NKDPLNDTVVDQFK              | 42d | 28 |
| FBgn0002741 | 620.25  | 38  | 2 | NLEHDLNLR                   | 42d | 28 |
| FBgn0002741 | 883.47  | 58  | 3 | NLNDEIAHQDELINK             | 42d | 28 |
| FBgn0002741 | 515.74  | 35  | 1 | NYSTELFR                    | 42d | 28 |
| FBgn0002741 | 951.87  | 61  | 1 | QAEQELADAHEQLNEVSAQNASISAAK | 42d | 28 |
| FBgn0002741 | 788.72  | 94  | 3 | QLEEAESQVSQLSK              | 42d | 28 |
| FBgn0002741 | 713.26  | 57  | 3 | QLQHNLNEVQSK                | 42d | 28 |
| FBgn0002741 | 986.58  | 72  | 1 | RLEAEKDELQAALAEAEAALEQEENK  | 42d | 28 |
| FBgn0002741 | 1216.53 | 58  | 1 | SKGSLEDQVVQTNPVLEAFGNAK     | 42d | 28 |
| FBgn0002741 | 556.61  | 50  | 2 | SKYESDGVAR                  | 42d | 28 |
| FBgn0002741 | 567.6   | 51  | 2 | TALLDLSGK                   | 42d | 28 |

|             |         |     |   |                           |     |    |
|-------------|---------|-----|---|---------------------------|-----|----|
| FBgn0002741 | 505.92  | 44  | 2 | TLNDFDASK                 | 42d | 28 |
| FBgn0002741 | 688.38  | 95  | 2 | VDDLAAELDASQK             | 42d | 28 |
| FBgn0002741 | 530.7   | 39  | 1 | VISQQSLER                 | 42d | 28 |
| FBgn0002741 | 850.5   | 70  | 2 | YQILNPAGIVGVDDPK          | 42d | 28 |
| FBgn0002741 | 914.49  | 98  | 2 | YQILNPAGIVGVDDPKK         | 42d | 28 |
| FBgn0002741 | 1138.65 | 67  | 2 | AEDMSNLTYLNDASVLHNL       | 46d | 28 |
| FBgn0002741 | 619.38  | 56  | 1 | AGVLGQMEEFR               | 46d | 28 |
| FBgn0002741 | 945.51  | 64  | 3 | AKLEQTLDELEDSL            | 46d | 28 |
| FBgn0002741 | 523.2   | 67  | 3 | ANAEAQVWR                 | 46d | 28 |
| FBgn0002741 | 687.76  | 63  | 1 | ANALQNELEESR              | 46d | 28 |
| FBgn0002741 | 666.63  | 72  | 2 | DIQTALEEEQR               | 46d | 28 |
| FBgn0002741 | 546.82  | 39  | 1 | DKELSSITAK                | 46d | 28 |
| FBgn0002741 | 977.51  | 92  | 4 | DLEEANIQHESTLANLR         | 46d | 28 |
| FBgn0002741 | 511.56  | 45  | 1 | EGYLLGEIK                 | 46d | 28 |
| FBgn0002741 | 822.09  | 72  | 3 | EKNEYYGQLNDR              | 46d | 28 |
| FBgn0002741 | 684.66  | 82  | 3 | ELSFQSEEDRK               | 46d | 28 |
| FBgn0002741 | 654.08  | 61  | 2 | EQLNSLMTTLR               | 46d | 28 |
| FBgn0002741 | 540.76  | 51  | 3 | GALQDYQER                 | 46d | 28 |
| FBgn0002741 | 790.12  | 80  | 5 | GAYEEGQEQLEAVR            | 46d | 28 |
| FBgn0002741 | 573.18  | 48  | 3 | GGGFATVSSAYK              | 46d | 28 |
| FBgn0002741 | 1109.12 | 92  | 3 | GSLEDQVVQTNPVLEAFGNAK     | 46d | 28 |
| FBgn0002741 | 956.88  | 117 | 3 | HNDAVAEMAEQVDQLNK         | 46d | 28 |
| FBgn0002741 | 703.55  | 58  | 3 | ISLTTQLEDTKR              | 46d | 28 |
| FBgn0002741 | 545.17  | 42  | 1 | KADQEISGLK                | 46d | 28 |
| FBgn0002741 | 679.83  | 89  | 1 | KLEADINELEIALDHANK        | 46d | 28 |
| FBgn0002741 | 1213.61 | 43  | 1 | KLESELQTLHSDLDELLNEAK     | 46d | 28 |
| FBgn0002741 | 788.27  | 108 | 3 | LAEAEETIESLNQK            | 46d | 28 |
| FBgn0002741 | 1401.34 | 54  | 1 | LEAEKDELQAALEEAEAALEQEENK | 46d | 28 |
| FBgn0002741 | 586.89  | 75  | 3 | LEDEQVVVLK                | 46d | 28 |
| FBgn0002741 | 816.24  | 77  | 2 | LEEAGGATSAQIELNK          | 46d | 28 |
| FBgn0002741 | 846.11  | 77  | 3 | LEQTLDELEDSL              | 46d | 28 |
| FBgn0002741 | 766.89  | 63  | 1 | LESELQTLHSDLDELLNEAK      | 46d | 28 |

|             |         |     |   |                          |     |    |
|-------------|---------|-----|---|--------------------------|-----|----|
| FBgn0002741 | 808.85  | 86  | 2 | LKVDDLAAELDASQK          | 46d | 28 |
| FBgn0002741 | 580.65  | 63  | 2 | LSIENSDLLR               | 46d | 28 |
| FBgn0002741 | 824.13  | 45  | 1 | LSTEVEDLQLEVDR           | 46d | 28 |
| FBgn0002741 | 623.53  | 74  | 3 | LTQEAVADLER              | 46d | 28 |
| FBgn0002741 | 693.21  | 65  | 3 | NEYYGQLNDLR              | 46d | 28 |
| FBgn0002741 | 817.36  | 75  | 2 | NKDPLNDTVVDQFK           | 46d | 28 |
| FBgn0002741 | 620.14  | 41  | 2 | NLEHDLNLR                | 46d | 28 |
| FBgn0002741 | 883.83  | 82  | 3 | NLNDEIAHQDELINK          | 46d | 28 |
| FBgn0002741 | 515.68  | 35  | 2 | NYSTELFR                 | 46d | 28 |
| FBgn0002741 | 788.75  | 71  | 1 | QLEEAESQVSQSK            | 46d | 28 |
| FBgn0002741 | 713.1   | 51  | 3 | QLQHRTLNEVQSK            | 46d | 28 |
| FBgn0002741 | 986.25  | 63  | 1 | RLEAEKDELQAALAEAALEQEENK | 46d | 28 |
| FBgn0002741 | 1216.49 | 90  | 2 | SKGSLEDQVVQTPVLEAFGNAK   | 46d | 28 |
| FBgn0002741 | 688.53  | 82  | 2 | VDDLAAELDASQK            | 46d | 28 |
| FBgn0002741 | 530.96  | 50  | 2 | VISQQSLER                | 46d | 28 |
| FBgn0002741 | 850.56  | 78  | 2 | YQILNPAGIVGVDDPK         | 46d | 28 |
| FBgn0002741 | 914.34  | 104 | 2 | YQILNPAGIVGVDDPKK        | 46d | 28 |
| FBgn0002741 | 1138.95 | 67  | 3 | AEDMSNLTYLNDASVLHNL      | 50d | 28 |
| FBgn0002741 | 619.38  | 65  | 1 | AGVLGQMEEFR              | 50d | 28 |
| FBgn0002741 | 945.57  | 91  | 3 | AKLEQTLDELEDSL           | 50d | 28 |
| FBgn0002741 | 733.09  | 111 | 2 | ALDSMQASLEAEAK           | 50d | 28 |
| FBgn0002741 | 523.43  | 54  | 2 | ANAEAQVWR                | 50d | 28 |
| FBgn0002741 | 687.71  | 68  | 2 | ANALQNELEESR             | 50d | 28 |
| FBgn0002741 | 666.9   | 66  | 2 | DIQTALEEEQR              | 50d | 28 |
| FBgn0002741 | 546.81  | 37  | 3 | DKELSSITAK               | 50d | 28 |
| FBgn0002741 | 587.24  | 52  | 3 | DLLDQIGEGGR              | 50d | 28 |
| FBgn0002741 | 576.66  | 62  | 1 | DLLQQVNPPK               | 50d | 28 |
| FBgn0002741 | 511.55  | 48  | 3 | EGYLLGEIK                | 50d | 28 |
| FBgn0002741 | 666.82  | 53  | 1 | ELENELDGEQR              | 50d | 28 |
| FBgn0002741 | 684.84  | 60  | 2 | ELSFQSEEDRK              | 50d | 28 |
| FBgn0002741 | 653.7   | 57  | 1 | EQLNSLMTTLR              | 50d | 28 |
| FBgn0002741 | 540.6   | 48  | 2 | GALQDYQER                | 50d | 28 |

|             |         |     |   |                            |     |    |
|-------------|---------|-----|---|----------------------------|-----|----|
| FBgn0002741 | 790.25  | 75  | 5 | GAYEEGQEQLEAVR             | 50d | 28 |
| FBgn0002741 | 1109.09 | 100 | 3 | GSLEDQVVQTNPVLEAFGNAK      | 50d | 28 |
| FBgn0002741 | 956.89  | 130 | 2 | HNDAVAEMAEQVDQLNK          | 50d | 28 |
| FBgn0002741 | 776.79  | 76  | 3 | IQEKEEEFENTR               | 50d | 28 |
| FBgn0002741 | 703.4   | 78  | 1 | ISLTTQLEDTKR               | 50d | 28 |
| FBgn0002741 | 1019.17 | 37  | 1 | KLEADINELEIALDHANK         | 50d | 28 |
| FBgn0002741 | 1213.61 | 57  | 1 | KLESELQTLHSDLDLLEAK        | 50d | 28 |
| FBgn0002741 | 788.64  | 108 | 3 | LAEAEETIESLNQK             | 50d | 28 |
| FBgn0002741 | 537.89  | 49  | 1 | LDEAEANALK                 | 50d | 28 |
| FBgn0002741 | 637.1   | 34  | 1 | LEADINELEIALDHANK          | 50d | 28 |
| FBgn0002741 | 934.27  | 66  | 3 | LEAEKDELQAALAEAEAALEQEENK  | 50d | 28 |
| FBgn0002741 | 586.67  | 75  | 2 | LEDEQVVVLK                 | 50d | 28 |
| FBgn0002741 | 816.66  | 108 | 3 | LEEAGGATSAQIELNK           | 50d | 28 |
| FBgn0002741 | 809.1   | 101 | 3 | LKVDDLAAELDASQK            | 50d | 28 |
| FBgn0002741 | 823.75  | 69  | 2 | LSTEVEDLQLEVDR             | 50d | 28 |
| FBgn0002741 | 623.2   | 70  | 3 | LTQEAVADLER                | 50d | 28 |
| FBgn0002741 | 693.36  | 58  | 2 | NEYYGQLNDLR                | 50d | 28 |
| FBgn0002741 | 817.34  | 76  | 2 | NKDPLNDTVVDQFK             | 50d | 28 |
| FBgn0002741 | 620.41  | 43  | 1 | NLEHDLNLR                  | 50d | 28 |
| FBgn0002741 | 883.69  | 80  | 3 | NLNDEIAHQDELINK            | 50d | 28 |
| FBgn0002741 | 515.71  | 40  | 1 | NYSTELFR                   | 50d | 28 |
| FBgn0002741 | 788.98  | 88  | 3 | QLEEAESQVSQLSK             | 50d | 28 |
| FBgn0002741 | 713.25  | 56  | 2 | QLQHTLNEVQSK               | 50d | 28 |
| FBgn0002741 | 986.26  | 96  | 3 | RLEAEKDELQAALAEAEAALEQEENK | 50d | 28 |
| FBgn0002741 | 1216.48 | 59  | 1 | SKGSLEDQVVQTNPVLEAFGNAK    | 50d | 28 |
| FBgn0002741 | 567.94  | 53  | 2 | TALLDLSLGEK                | 50d | 28 |
| FBgn0002741 | 688.47  | 89  | 3 | VDDLAAELDASQK              | 50d | 28 |
| FBgn0002741 | 531.04  | 37  | 1 | VISQQSLER                  | 50d | 28 |
| FBgn0002741 | 850.4   | 77  | 3 | YQILNPAGIVGVDDPK           | 50d | 28 |
| FBgn0002741 | 610.16  | 52  | 1 | YQILNPAGIVGVDDPKK          | 50d | 28 |
| FBgn0002741 | 523.29  | 42  | 1 | ADLAEQAISK                 | 52d | 28 |
| FBgn0002741 | 548.51  | 40  | 1 | AEELHAAEVK                 | 52d | 28 |

|             |         |     |   |                         |     |    |
|-------------|---------|-----|---|-------------------------|-----|----|
| FBgn0002741 | 542.86  | 49  | 1 | AGVDHITNEK              | 52d | 28 |
| FBgn0002741 | 619.14  | 63  | 2 | AGVLGQMEEFR             | 52d | 28 |
| FBgn0002741 | 546.55  | 34  | 1 | AGVLGQMEEFRDER          | 52d | 28 |
| FBgn0002741 | 945.6   | 96  | 3 | AKLEQTLDELEDSLER        | 52d | 28 |
| FBgn0002741 | 732.96  | 110 | 3 | ALDSMQASLEAEAK          | 52d | 28 |
| FBgn0002741 | 523.24  | 56  | 2 | ANAEAQVWR               | 52d | 28 |
| FBgn0002741 | 687.64  | 72  | 3 | ANALQNELEESR            | 52d | 28 |
| FBgn0002741 | 666.92  | 75  | 2 | DIQTALEEEQR             | 52d | 28 |
| FBgn0002741 | 546.92  | 43  | 1 | DKELSSITAK              | 52d | 28 |
| FBgn0002741 | 977.73  | 45  | 1 | DLEEANIQHESLANLR        | 52d | 28 |
| FBgn0002741 | 587.35  | 53  | 3 | DLLDQIGEGGR             | 52d | 28 |
| FBgn0002741 | 511.7   | 56  | 3 | EGYLLGEIK               | 52d | 28 |
| FBgn0002741 | 822     | 48  | 1 | EKNEYYGQLNDLR           | 52d | 28 |
| FBgn0002741 | 654.05  | 46  | 2 | EQLNSLMTTLR             | 52d | 28 |
| FBgn0002741 | 540.63  | 49  | 1 | GALQDYQER               | 52d | 28 |
| FBgn0002741 | 790.62  | 94  | 5 | GAYEEGQEQLAVR           | 52d | 28 |
| FBgn0002741 | 573.25  | 54  | 1 | GGGFATVSSAYK            | 52d | 28 |
| FBgn0002741 | 1109.23 | 96  | 2 | GSLEDQVVQTNPVLEAFGNAK   | 52d | 28 |
| FBgn0002741 | 956.86  | 109 | 3 | HNDAVAEMAEQVDQLNK       | 52d | 28 |
| FBgn0002741 | 738.41  | 71  | 1 | IEELEEVEAER             | 52d | 28 |
| FBgn0002741 | 703.49  | 77  | 2 | ISLTTQLEDTKR            | 52d | 28 |
| FBgn0002741 | 1018.95 | 93  | 1 | KLEADINELEIALDHANK      | 52d | 28 |
| FBgn0002741 | 1213.65 | 77  | 2 | KLESELQTLHSDLDELLNEAK   | 52d | 28 |
| FBgn0002741 | 788.49  | 81  | 2 | LAEAEETIESLNQK          | 52d | 28 |
| FBgn0002741 | 1401.33 | 74  | 4 | LEAEKDELQAALAEAALEQEENK | 52d | 28 |
| FBgn0002741 | 586.95  | 75  | 1 | LEDEQVVVLK              | 52d | 28 |
| FBgn0002741 | 816.34  | 105 | 2 | LEEAGGATSAQIELNK        | 52d | 28 |
| FBgn0002741 | 845.82  | 49  | 2 | LEQTLDELEDSLER          | 52d | 28 |
| FBgn0002741 | 1149.7  | 52  | 1 | LESELQTLHSDLDELLNEAK    | 52d | 28 |
| FBgn0002741 | 808.83  | 104 | 3 | LKVDDLAAELDASQK         | 52d | 28 |
| FBgn0002741 | 580.79  | 66  | 3 | LSIENSDLLR              | 52d | 28 |
| FBgn0002741 | 823.84  | 39  | 1 | LSTEVEDLQLEVDR          | 52d | 28 |

|             |         |     |   |                            |     |    |
|-------------|---------|-----|---|----------------------------|-----|----|
| FBgn0002741 | 623.2   | 63  | 2 | LTQEAVADLER                | 52d | 28 |
| FBgn0002741 | 693.49  | 64  | 2 | NEYYGQLNDLR                | 52d | 28 |
| FBgn0002741 | 817.34  | 61  | 1 | NKDPLNDTVVDQFK             | 52d | 28 |
| FBgn0002741 | 620.14  | 41  | 1 | NLEHDLNLR                  | 52d | 28 |
| FBgn0002741 | 884.18  | 76  | 3 | NLNDEIAHQDELINK            | 52d | 28 |
| FBgn0002741 | 788.97  | 87  | 2 | QLEEAESQVSQLSK             | 52d | 28 |
| FBgn0002741 | 713.4   | 63  | 2 | QLQHTLNEVQSK               | 52d | 28 |
| FBgn0002741 | 1479.12 | 53  | 2 | RLEAEKDELQAALAEAEAALEQEENK | 52d | 28 |
| FBgn0002741 | 688.2   | 82  | 2 | VDDLAAELDASQK              | 52d | 28 |
| FBgn0002741 | 530.85  | 52  | 1 | VISQQSLER                  | 52d | 28 |
| FBgn0002741 | 542.61  | 54  | 2 | AGVDHITNEK                 | 56d | 28 |
| FBgn0002741 | 945.16  | 38  | 1 | AKLEQTLDELEDSLER           | 56d | 28 |
| FBgn0002741 | 522.63  | 46  | 1 | AQLELSQVR                  | 56d | 28 |
| FBgn0002741 | 659.01  | 84  | 3 | DIEDLELNVQK                | 56d | 28 |
| FBgn0002741 | 666.71  | 67  | 1 | DIQTALEEEQR                | 56d | 28 |
| FBgn0002741 | 977.71  | 74  | 3 | DLEEANIQHESTLANLR          | 56d | 28 |
| FBgn0002741 | 587.37  | 42  | 1 | DLLDQIGEGGR                | 56d | 28 |
| FBgn0002741 | 653.68  | 57  | 2 | EQLNSLMTTLR                | 56d | 28 |
| FBgn0002741 | 1109.12 | 83  | 3 | GSLEDQVVQTNPVLEAFGNAK      | 56d | 28 |
| FBgn0002741 | 957.08  | 104 | 3 | HNDAVAEMAEQVDQLNK          | 56d | 28 |
| FBgn0002741 | 776.61  | 71  | 4 | IQEKEEFENTR                | 56d | 28 |
| FBgn0002741 | 703.24  | 58  | 2 | ISLTTQLEDTKR               | 56d | 28 |
| FBgn0002741 | 613.37  | 64  | 1 | KAEELHAAEVK                | 56d | 28 |
| FBgn0002741 | 479.57  | 49  | 1 | KALEQQIK                   | 56d | 28 |
| FBgn0002741 | 1019.18 | 105 | 3 | KLEADINELEIALDHANK         | 56d | 28 |
| FBgn0002741 | 788.56  | 88  | 2 | LAEAEETIESLNQK             | 56d | 28 |
| FBgn0002741 | 1401.15 | 81  | 1 | LEAEKDELQAALAEAEAALEQEENK  | 56d | 28 |
| FBgn0002741 | 816.29  | 111 | 3 | LEEAGGATSAQIELNK           | 56d | 28 |
| FBgn0002741 | 845.99  | 66  | 4 | LEQTLDELEDSLER             | 56d | 28 |
| FBgn0002741 | 808.92  | 101 | 3 | LKVDDLAAELDASQK            | 56d | 28 |
| FBgn0002741 | 580.66  | 69  | 1 | LSIENSDLLR                 | 56d | 28 |
| FBgn0002741 | 823.87  | 54  | 2 | LSTEVEDLQLEVDR             | 56d | 28 |

|             |         |    |   |                            |      |    |
|-------------|---------|----|---|----------------------------|------|----|
| FBgn0002741 | 442.61  | 35 | 1 | LTNTHLGK                   | 56d  | 28 |
| FBgn0002741 | 623.17  | 71 | 1 | LTQEAVADLER                | 56d  | 28 |
| FBgn0002741 | 817.27  | 71 | 1 | NKDPLNDTVVDQFK             | 56d  | 28 |
| FBgn0002741 | 620.12  | 50 | 3 | NLEHDLNLR                  | 56d  | 28 |
| FBgn0002741 | 789.13  | 78 | 1 | QLEEAESQVSQLSK             | 56d  | 28 |
| FBgn0002741 | 713.17  | 50 | 3 | QLQHTLNEVQSK               | 56d  | 28 |
| FBgn0002741 | 1479.13 | 74 | 3 | RLEAEKDELQAALAEAEAALEQEENK | 56d  | 28 |
| FBgn0002741 | 1216.53 | 85 | 2 | SKGSLEDQVVQTPVLEAFGNAK     | 56d  | 28 |
| FBgn0002741 | 556.69  | 41 | 2 | SKYESDGVAR                 | 56d  | 28 |
| FBgn0002741 | 850.5   | 87 | 2 | YQILNPAGIVGVDDPK           | 56d  | 28 |
| FBgn0002741 | 914.64  | 85 | 3 | YQILNPAGIVGVDDPKK          | 56d  | 28 |
| FBgn0002772 | 705.91  | 46 | 2 | ALNLNPTLALIEK              | 2d   | 18 |
| FBgn0002772 | 847.47  | 66 | 1 | IKLDEFLPIYSQVK             | 2d   | 18 |
| FBgn0002772 | 705.8   | 56 | 3 | ALNLNPTLALIEK              | 22d  | 18 |
| FBgn0002772 | 726.49  | 64 | 3 | LDEFLPIYSQVK               | 22d  | 18 |
| FBgn0002772 | 705.38  | 49 | 3 | ALNLNPTLALIEK              | 42d  | 18 |
| FBgn0002772 | 726.79  | 57 | 3 | LDEFLPIYSQVK               | 42d  | 18 |
| FBgn0002772 | 705.44  | 60 | 2 | ALNLNPTLALIEK              | 62d  | 18 |
| FBgn0002772 | 726.82  | 51 | 2 | LDEFLPIYSQVK               | 62d  | 18 |
| FBgn0002772 | 704.88  | 43 | 1 | ALNLNPTLALIEK              | 82d  | 18 |
| FBgn0002772 | 726.97  | 59 | 3 | LDEFLPIYSQVK               | 82d  | 18 |
| FBgn0002772 | 705.69  | 54 | 2 | ALNLNPTLALIEK              | 102d | 18 |
| FBgn0002772 | 726.62  | 36 | 1 | LDEFLPIYSQVK               | 102d | 18 |
| FBgn0002772 | 706.04  | 59 | 2 | ALNLNPTLALIEK              | 112d | 18 |
| FBgn0002772 | 726.42  | 49 | 3 | LDEFLPIYSQVK               | 112d | 18 |
| FBgn0002772 | 705.95  | 56 | 1 | ALNLNPTLALIEK              | 122d | 18 |
| FBgn0002772 | 726.5   | 50 | 1 | LDEFLPIYSQVK               | 122d | 18 |
| FBgn0002772 | 705.17  | 65 | 2 | ALNLNPTLALIEK              | 132d | 18 |
| FBgn0002772 | 727.03  | 61 | 2 | LDEFLPIYSQVK               | 132d | 18 |
| FBgn0002772 | 705.46  | 51 | 1 | ALNLNPTLALIEK              | 142d | 18 |
| FBgn0002772 | 705.63  | 52 | 2 | ALNLNPTLALIEK              | 2d   | 28 |
| FBgn0002772 | 847.4   | 62 | 2 | IKLDEFLPIYSQVK             | 2d   | 28 |



|             |         |     |   |                                       |     |    |
|-------------|---------|-----|---|---------------------------------------|-----|----|
| FBgn0002772 | 726.84  | 56  | 1 | LDEFLPIYSQVK                          | 2d  | 28 |
| FBgn0002772 | 705.89  | 62  | 3 | ALNLNPTLALIEK                         | 12d | 28 |
| FBgn0002772 | 847.53  | 62  | 1 | IKLDEFLPIYSQVK                        | 12d | 28 |
| FBgn0002772 | 727.02  | 65  | 3 | LDEFLPIYSQVK                          | 12d | 28 |
| FBgn0002772 | 847.42  | 40  | 1 | IKLDEFLPIYSQVK                        | 22d | 28 |
| FBgn0002772 | 726.36  | 65  | 2 | LDEFLPIYSQVK                          | 22d | 28 |
| FBgn0002772 | 705.9   | 49  | 2 | ALNLNPTLALIEK                         | 32d | 28 |
| FBgn0002772 | 727.06  | 62  | 3 | LDEFLPIYSQVK                          | 32d | 28 |
| FBgn0002772 | 705.94  | 60  | 2 | ALNLNPTLALIEK                         | 36d | 28 |
| FBgn0002772 | 726.82  | 58  | 2 | LDEFLPIYSQVK                          | 36d | 28 |
| FBgn0002772 | 705.72  | 62  | 2 | ALNLNPTLALIEK                         | 42d | 28 |
| FBgn0002772 | 847.54  | 75  | 1 | IKLDEFLPIYSQVK                        | 42d | 28 |
| FBgn0002772 | 726.96  | 60  | 3 | LDEFLPIYSQVK                          | 42d | 28 |
| FBgn0002772 | 727.01  | 62  | 1 | LDEFLPIYSQVK                          | 46d | 28 |
| FBgn0002772 | 705.83  | 49  | 1 | ALNLNPTLALIEK                         | 50d | 28 |
| FBgn0002772 | 726.88  | 45  | 2 | LDEFLPIYSQVK                          | 50d | 28 |
| FBgn0002772 | 705.06  | 49  | 3 | ALNLNPTLALIEK                         | 52d | 28 |
| FBgn0002772 | 705.85  | 59  | 4 | ALNLNPTLALIEK                         | 56d | 28 |
| FBgn0002772 | 726.87  | 67  | 3 | LDEFLPIYSQVK                          | 56d | 28 |
| FBgn0002773 | 876.44  | 73  | 2 | EAFQLMDADKDGIIIGK                     | 2d  | 18 |
| FBgn0002773 | 1573.26 | 50  | 1 | EEGGTSETASEAASEAATPAPAATPAPAASATGSK   | 2d  | 18 |
| FBgn0002773 | 828.71  | 38  | 1 | EVDDAYDQMVIDDK                        | 2d  | 18 |
| FBgn0002773 | 935.14  | 105 | 1 | MATSGANDEDEVVIAAFK                    | 2d  | 18 |
| FBgn0002773 | 809.76  | 65  | 2 | NQIDTAALIEMLTGK                       | 2d  | 18 |
| FBgn0002773 | 1296.79 | 46  | 3 | NQIDTAALIEMLTGKGESEEEEEAA             | 2d  | 18 |
| FBgn0002773 | 655.72  | 48  | 2 | TFDNDGLIDGDK                          | 2d  | 18 |
| FBgn0002773 | 807.47  | 74  | 3 | TFDNDGLIDGDKFR                        | 2d  | 18 |
| FBgn0002773 | 1125.65 | 51  | 1 | TKEEGGTSETASEAASEAATPAPAATPAPAASATGSK | 2d  | 18 |
| FBgn0002773 | 876.64  | 69  | 1 | EAFQLMDADKDGIIIGK                     | 22d | 18 |
| FBgn0002773 | 1573.05 | 48  | 3 | EEGGTSETASEAASEAATPAPAATPAPAASATGSK   | 22d | 18 |
| FBgn0002773 | 828.77  | 74  | 2 | EVDDAYDQMVIDDK                        | 22d | 18 |
| FBgn0002773 | 934.69  | 102 | 1 | MATSGANDEDEVVIAAFK                    | 22d | 18 |

|             |         |     |   |                                       |      |    |
|-------------|---------|-----|---|---------------------------------------|------|----|
| FBgn0002773 | 538.65  | 62  | 2 | TFDNDGLIDGDKFR                        | 22d  | 18 |
| FBgn0002773 | 1125.62 | 44  | 2 | TKEEGGTSETASEAASEAATPAPAATPAPAASATGSK | 22d  | 18 |
| FBgn0002773 | 876.34  | 72  | 3 | EAFQLMDADKDGIIIGK                     | 42d  | 18 |
| FBgn0002773 | 934.79  | 131 | 2 | MATSGANDEDEVVIAAFK                    | 42d  | 18 |
| FBgn0002773 | 809.81  | 64  | 3 | NQIDTAALIEMLTGK                       | 42d  | 18 |
| FBgn0002773 | 1296.83 | 49  | 2 | NQIDTAALIEMLTGKGEEEEEEAA              | 42d  | 18 |
| FBgn0002773 | 807.58  | 60  | 2 | TFDNDGLIDGDKFR                        | 42d  | 18 |
| FBgn0002773 | 1573    | 66  | 2 | EEGGTSETASEAASEAATPAPAATPAPAASATGSK   | 62d  | 18 |
| FBgn0002773 | 828.84  | 66  | 1 | EVDDAYDQMVIDDK                        | 62d  | 18 |
| FBgn0002773 | 935.04  | 62  | 1 | MATSGANDEDEVVIAAFK                    | 62d  | 18 |
| FBgn0002773 | 655.8   | 62  | 2 | TFDNDGLIDGDK                          | 62d  | 18 |
| FBgn0002773 | 807.4   | 70  | 3 | TFDNDGLIDGDKFR                        | 62d  | 18 |
| FBgn0002773 | 1125.56 | 57  | 7 | TKEEGGTSETASEAASEAATPAPAATPAPAASATGSK | 62d  | 18 |
| FBgn0002773 | 876.36  | 75  | 3 | EAFQLMDADKDGIIIGK                     | 82d  | 18 |
| FBgn0002773 | 1573.36 | 63  | 2 | EEGGTSETASEAASEAATPAPAATPAPAASATGSK   | 82d  | 18 |
| FBgn0002773 | 828.63  | 90  | 3 | EVDDAYDQMVIDDK                        | 82d  | 18 |
| FBgn0002773 | 935.18  | 123 | 3 | MATSGANDEDEVVIAAFK                    | 82d  | 18 |
| FBgn0002773 | 656.04  | 80  | 2 | TFDNDGLIDGDK                          | 82d  | 18 |
| FBgn0002773 | 807.35  | 69  | 2 | TFDNDGLIDGDKFR                        | 82d  | 18 |
| FBgn0002773 | 1687.57 | 74  | 1 | TKEEGGTSETASEAASEAATPAPAATPAPAASATGSK | 82d  | 18 |
| FBgn0002773 | 876.24  | 74  | 3 | EAFQLMDADKDGIIIGK                     | 102d | 18 |
| FBgn0002773 | 1573.29 | 38  | 2 | EEGGTSETASEAASEAATPAPAATPAPAASATGSK   | 102d | 18 |
| FBgn0002773 | 828.91  | 52  | 1 | EVDDAYDQMVIDDK                        | 102d | 18 |
| FBgn0002773 | 934.71  | 125 | 3 | MATSGANDEDEVVIAAFK                    | 102d | 18 |
| FBgn0002773 | 538.73  | 57  | 3 | TFDNDGLIDGDKFR                        | 102d | 18 |
| FBgn0002773 | 1125.57 | 39  | 2 | TKEEGGTSETASEAASEAATPAPAATPAPAASATGSK | 102d | 18 |
| FBgn0002773 | 876     | 64  | 1 | EAFQLMDADKDGIIIGK                     | 112d | 18 |
| FBgn0002773 | 1573.28 | 64  | 1 | EEGGTSETASEAASEAATPAPAATPAPAASATGSK   | 112d | 18 |
| FBgn0002773 | 934.66  | 108 | 2 | MATSGANDEDEVVIAAFK                    | 112d | 18 |
| FBgn0002773 | 1296.6  | 67  | 2 | NQIDTAALIEMLTGKGEEEEEEAA              | 112d | 18 |
| FBgn0002773 | 806.98  | 66  | 2 | TFDNDGLIDGDKFR                        | 112d | 18 |
| FBgn0002773 | 876.15  | 58  | 2 | EAFQLMDADKDGIIIGK                     | 122d | 18 |

|             |         |     |   |                                       |      |    |
|-------------|---------|-----|---|---------------------------------------|------|----|
| FBgn0002773 | 1573.43 | 61  | 2 | EEGGTSETASEAASEAATPAPAATPAPAASATGSK   | 122d | 18 |
| FBgn0002773 | 934.96  | 63  | 1 | MATSGANDEDEVVIAAFK                    | 122d | 18 |
| FBgn0002773 | 807.63  | 70  | 3 | TFDNDGLIDGDKFR                        | 122d | 18 |
| FBgn0002773 | 1573.3  | 78  | 6 | EEGGTSETASEAASEAATPAPAATPAPAASATGSK   | 132d | 18 |
| FBgn0002773 | 829.1   | 55  | 2 | EVDDAYDQMVIDDK                        | 132d | 18 |
| FBgn0002773 | 935     | 115 | 2 | MATSGANDEDEVVIAAFK                    | 132d | 18 |
| FBgn0002773 | 1296.69 | 37  | 1 | NQIDTAALIEMLTGKGESEEEEEAA             | 132d | 18 |
| FBgn0002773 | 807.43  | 58  | 3 | TFDNDGLIDGDKFR                        | 132d | 18 |
| FBgn0002773 | 876.66  | 56  | 2 | EAFQLMDADKDGIIIGK                     | 142d | 18 |
| FBgn0002773 | 1573.12 | 52  | 2 | EEGGTSETASEAASEAATPAPAATPAPAASATGSK   | 142d | 18 |
| FBgn0002773 | 934.87  | 104 | 2 | MATSGANDEDEVVIAAFK                    | 142d | 18 |
| FBgn0002773 | 807.57  | 58  | 1 | TFDNDGLIDGDKFR                        | 142d | 18 |
| FBgn0002773 | 876.18  | 73  | 3 | EAFQLMDADKDGIIIGK                     | 2d   | 28 |
| FBgn0002773 | 1573.06 | 53  | 3 | EEGGTSETASEAASEAATPAPAATPAPAASATGSK   | 2d   | 28 |
| FBgn0002773 | 828.77  | 61  | 2 | EVDDAYDQMVIDDK                        | 2d   | 28 |
| FBgn0002773 | 934.92  | 110 | 1 | MATSGANDEDEVVIAAFK                    | 2d   | 28 |
| FBgn0002773 | 809.54  | 40  | 1 | NQIDTAALIEMLTGK                       | 2d   | 28 |
| FBgn0002773 | 807.29  | 74  | 2 | TFDNDGLIDGDKFR                        | 2d   | 28 |
| FBgn0002773 | 1687.85 | 47  | 1 | TKEEGGTSETASEAASEAATPAPAATPAPAASATGSK | 2d   | 28 |
| FBgn0002773 | 876.65  | 69  | 3 | EAFQLMDADKDGIIIGK                     | 12d  | 28 |
| FBgn0002773 | 1572.99 | 50  | 2 | EEGGTSETASEAASEAATPAPAATPAPAASATGSK   | 12d  | 28 |
| FBgn0002773 | 828.68  | 70  | 2 | EVDDAYDQMVIDDK                        | 12d  | 28 |
| FBgn0002773 | 934.94  | 115 | 1 | MATSGANDEDEVVIAAFK                    | 12d  | 28 |
| FBgn0002773 | 809.96  | 37  | 1 | NQIDTAALIEMLTGK                       | 12d  | 28 |
| FBgn0002773 | 1296.44 | 57  | 2 | NQIDTAALIEMLTGKGESEEEEEAA             | 12d  | 28 |
| FBgn0002773 | 807.52  | 58  | 1 | TFDNDGLIDGDKFR                        | 12d  | 28 |
| FBgn0002773 | 1125.59 | 68  | 3 | TKEEGGTSETASEAASEAATPAPAATPAPAASATGSK | 12d  | 28 |
| FBgn0002773 | 876.07  | 65  | 3 | EAFQLMDADKDGIIIGK                     | 22d  | 28 |
| FBgn0002773 | 1573.06 | 47  | 1 | EEGGTSETASEAASEAATPAPAATPAPAASATGSK   | 22d  | 28 |
| FBgn0002773 | 828.9   | 74  | 3 | EVDDAYDQMVIDDK                        | 22d  | 28 |
| FBgn0002773 | 934.97  | 114 | 1 | MATSGANDEDEVVIAAFK                    | 22d  | 28 |
| FBgn0002773 | 538.71  | 70  | 3 | TFDNDGLIDGDKFR                        | 22d  | 28 |

|             |         |     |   |                                       |     |    |
|-------------|---------|-----|---|---------------------------------------|-----|----|
| FBgn0002773 | 876.45  | 76  | 3 | EAFQLMDADKDGII GK                     | 32d | 28 |
| FBgn0002773 | 1573.07 | 39  | 1 | EEGGTSETASEAASEAATPAPAATPAPAASATGSK   | 32d | 28 |
| FBgn0002773 | 829.09  | 80  | 2 | EVDDAYDQMVIDDK                        | 32d | 28 |
| FBgn0002773 | 934.97  | 124 | 3 | MATSGANDEDEVVIAAFK                    | 32d | 28 |
| FBgn0002773 | 1296.66 | 47  | 1 | NQIDTAALIEMLTGKGE EEEEEAA             | 32d | 28 |
| FBgn0002773 | 538.61  | 63  | 3 | TFDNDGLIDGDKFR                        | 32d | 28 |
| FBgn0002773 | 1125.66 | 54  | 2 | TKEEGGTSETASEAASEAATPAPAATPAPAASATGSK | 32d | 28 |
| FBgn0002773 | 876.45  | 84  | 1 | EAFQLMDADKDGII GK                     | 36d | 28 |
| FBgn0002773 | 1573.35 | 67  | 2 | EEGGTSETASEAASEAATPAPAATPAPAASATGSK   | 36d | 28 |
| FBgn0002773 | 828.87  | 87  | 3 | EVDDAYDQMVIDDK                        | 36d | 28 |
| FBgn0002773 | 809.93  | 50  | 1 | NQIDTAALIEMLTGK                       | 36d | 28 |
| FBgn0002773 | 1296.58 | 36  | 1 | NQIDTAALIEMLTGKGE EEEEEAA             | 36d | 28 |
| FBgn0002773 | 807.18  | 95  | 3 | TFDNDGLIDGDKFR                        | 36d | 28 |
| FBgn0002773 | 1687.61 | 72  | 1 | TKEEGGTSETASEAASEAATPAPAATPAPAASATGSK | 36d | 28 |
| FBgn0002773 | 876.28  | 73  | 1 | EAFQLMDADKDGII GK                     | 42d | 28 |
| FBgn0002773 | 828.81  | 58  | 2 | EVDDAYDQMVIDDK                        | 42d | 28 |
| FBgn0002773 | 935.06  | 101 | 1 | MATSGANDEDEVVIAAFK                    | 42d | 28 |
| FBgn0002773 | 1296.66 | 42  | 1 | NQIDTAALIEMLTGKGE EEEEEAA             | 42d | 28 |
| FBgn0002773 | 807.32  | 70  | 1 | TFDNDGLIDGDKFR                        | 42d | 28 |
| FBgn0002773 | 1125.55 | 44  | 2 | TKEEGGTSETASEAASEAATPAPAATPAPAASATGSK | 42d | 28 |
| FBgn0002773 | 876.34  | 62  | 3 | EAFQLMDADKDGII GK                     | 46d | 28 |
| FBgn0002773 | 828.9   | 74  | 3 | EVDDAYDQMVIDDK                        | 46d | 28 |
| FBgn0002773 | 934.95  | 102 | 1 | MATSGANDEDEVVIAAFK                    | 46d | 28 |
| FBgn0002773 | 1296.76 | 39  | 2 | NQIDTAALIEMLTGKGE EEEEEAA             | 46d | 28 |
| FBgn0002773 | 807.2   | 64  | 3 | TFDNDGLIDGDKFR                        | 46d | 28 |
| FBgn0002773 | 1125.51 | 63  | 2 | TKEEGGTSETASEAASEAATPAPAATPAPAASATGSK | 46d | 28 |
| FBgn0002773 | 876.31  | 85  | 2 | EAFQLMDADKDGII GK                     | 50d | 28 |
| FBgn0002773 | 1573.1  | 38  | 1 | EEGGTSETASEAASEAATPAPAATPAPAASATGSK   | 50d | 28 |
| FBgn0002773 | 543.48  | 38  | 1 | EMLMNF GDK                            | 50d | 28 |
| FBgn0002773 | 828.87  | 77  | 1 | EVDDAYDQMVIDDK                        | 50d | 28 |
| FBgn0002773 | 935.17  | 124 | 2 | MATSGANDEDEVVIAAFK                    | 50d | 28 |
| FBgn0002773 | 809.95  | 60  | 1 | NQIDTAALIEMLTGK                       | 50d | 28 |

|             |         |     |   |                                       |      |    |
|-------------|---------|-----|---|---------------------------------------|------|----|
| FBgn0002773 | 1296.76 | 44  | 1 | NQIDTAALIEMLTGKGESEEEEEAA             | 50d  | 28 |
| FBgn0002773 | 807.27  | 62  | 2 | TFDNDGLIDGDKFR                        | 50d  | 28 |
| FBgn0002773 | 1125.59 | 43  | 1 | TKEEGGTSETASEAASEAATPAPAATPAPAASATGSK | 50d  | 28 |
| FBgn0002773 | 876.4   | 66  | 2 | EAFQLMDADKDGIIIGK                     | 52d  | 28 |
| FBgn0002773 | 1573.2  | 61  | 3 | EEGGTSETASEAASEAATPAPAATPAPAASATGSK   | 52d  | 28 |
| FBgn0002773 | 828.89  | 109 | 2 | EVDDAYDQMVIDDK                        | 52d  | 28 |
| FBgn0002773 | 809.94  | 69  | 2 | NQIDTAALIEMLTGK                       | 52d  | 28 |
| FBgn0002773 | 1296.74 | 43  | 1 | NQIDTAALIEMLTGKGESEEEEEAA             | 52d  | 28 |
| FBgn0002773 | 655.76  | 50  | 1 | TFDNDGLIDGDK                          | 52d  | 28 |
| FBgn0002773 | 807.37  | 67  | 3 | TFDNDGLIDGDKFR                        | 52d  | 28 |
| FBgn0002773 | 1125.65 | 57  | 3 | TKEEGGTSETASEAASEAATPAPAATPAPAASATGSK | 52d  | 28 |
| FBgn0002773 | 876.51  | 54  | 2 | EAFQLMDADKDGIIIGK                     | 56d  | 28 |
| FBgn0002773 | 828.9   | 87  | 2 | EVDDAYDQMVIDDK                        | 56d  | 28 |
| FBgn0002773 | 542.61  | 36  | 1 | LLAILSLNIVKSVDK                       | 56d  | 28 |
| FBgn0002773 | 935.08  | 135 | 1 | MATSGANDEDEVVIAAFK                    | 56d  | 28 |
| FBgn0002773 | 810.16  | 76  | 1 | NQIDTAALIEMLTGK                       | 56d  | 28 |
| FBgn0002773 | 1296.82 | 47  | 1 | NQIDTAALIEMLTGKGESEEEEEAA             | 56d  | 28 |
| FBgn0002773 | 807.43  | 73  | 3 | TFDNDGLIDGDKFR                        | 56d  | 28 |
| FBgn0002773 | 1125.54 | 35  | 1 | TKEEGGTSETASEAASEAATPAPAATPAPAASATGSK | 56d  | 28 |
| FBgn0002789 | 1122.98 | 43  | 2 | NPEMDKEAQEWIEAIIAEK                   | 2d   | 18 |
| FBgn0002789 | 643.43  | 44  | 1 | FMENINNFQK                            | 122d | 18 |
| FBgn0002789 | 643.44  | 39  | 1 | FMENINNFQK                            | 132d | 18 |
| FBgn0002789 | 677.7   | 37  | 1 | FPAGQSYEDVLK                          | 36d  | 28 |
| FBgn0002789 | 765.96  | 68  | 3 | EAQEWIEAIIAEK                         | 56d  | 28 |
| FBgn0002791 | 649.11  | 43  | 1 | LIFSGGVYQLAK                          | 32d  | 28 |
| FBgn0002855 | 858.44  | 75  | 3 | DSAPPAANQFQEANVR                      | 82d  | 18 |
| FBgn0002921 | 505.65  | 51  | 1 | DGPNALTPPK                            | 2d   | 18 |
| FBgn0002921 | 695.85  | 85  | 3 | DVSSDQLDEILR                          | 2d   | 18 |
| FBgn0002921 | 886.37  | 53  | 1 | EAFNNAYMELGGLGER                      | 2d   | 18 |
| FBgn0002921 | 645.99  | 78  | 3 | EVSGDASEAALLK                         | 2d   | 18 |
| FBgn0002921 | 848.16  | 53  | 2 | FNTDDINFPIDNLR                        | 2d   | 18 |
| FBgn0002921 | 737.23  | 63  | 3 | GAEFTHENPLETK                         | 2d   | 18 |

|             |         |     |   |                         |     |    |
|-------------|---------|-----|---|-------------------------|-----|----|
| FBgn0002921 | 610.64  | 62  | 3 | IAEVPFNSTNK             | 2d  | 18 |
| FBgn0002921 | 807.77  | 76  | 2 | IAGLASGLDTGETPIAK       | 2d  | 18 |
| FBgn0002921 | 568.35  | 58  | 3 | ISPEELYQR               | 2d  | 18 |
| FBgn0002921 | 810.24  | 87  | 2 | KADIGVAMGIAGSDVSK       | 2d  | 18 |
| FBgn0002921 | 496.37  | 35  | 1 | LIFDNLKK                | 2d  | 18 |
| FBgn0002921 | 619.77  | 51  | 2 | LNIPVSEVNPR             | 2d  | 18 |
| FBgn0002921 | 908.51  | 97  | 3 | MGAIVAVTGDGVNDSPALK     | 2d  | 18 |
| FBgn0002921 | 541.15  | 43  | 1 | NSIFQQGMR               | 2d  | 18 |
| FBgn0002921 | 1233.31 | 84  | 1 | QAADMILLDDNFASIVTGVEEGR | 2d  | 18 |
| FBgn0002921 | 806.99  | 36  | 1 | RNPGGWLEQETY            | 2d  | 18 |
| FBgn0002921 | 959.64  | 109 | 1 | SVGIISEGNETVEDIAQR      | 2d  | 18 |
| FBgn0002921 | 803.89  | 43  | 1 | VDNSSLTGESEPQSR         | 2d  | 18 |
| FBgn0002921 | 692.09  | 67  | 2 | VIMVTGDHPITAK           | 2d  | 18 |
| FBgn0002921 | 384.12  | 36  | 1 | YLLVMK                  | 2d  | 18 |
| FBgn0002921 | 902.65  | 57  | 3 | YQVSIHETEDTNDPR         | 2d  | 18 |
| FBgn0002921 | 695.88  | 79  | 3 | DVSSDQLDEILR            | 22d | 18 |
| FBgn0002921 | 886.19  | 57  | 5 | EAFNNAYMELGGLGER        | 22d | 18 |
| FBgn0002921 | 645.82  | 73  | 3 | EVSGDASEAALLK           | 22d | 18 |
| FBgn0002921 | 847.93  | 65  | 2 | FNTDDINFPIDNLR          | 22d | 18 |
| FBgn0002921 | 737.16  | 70  | 3 | GAEFTHENPLETK           | 22d | 18 |
| FBgn0002921 | 807.86  | 73  | 2 | IAGLASGLDTGETPIAK       | 22d | 18 |
| FBgn0002921 | 810.41  | 76  | 1 | KADIGVAMGIAGSDVSK       | 22d | 18 |
| FBgn0002921 | 908.49  | 75  | 1 | MGAIVAVTGDGVNDSPALK     | 22d | 18 |
| FBgn0002921 | 638.82  | 44  | 1 | NMVPQFATVIR             | 22d | 18 |
| FBgn0002921 | 807.12  | 55  | 2 | RNPGGWLEQETY            | 22d | 18 |
| FBgn0002921 | 803.68  | 54  | 2 | VDNSSLTGESEPQSR         | 22d | 18 |
| FBgn0002921 | 512.34  | 43  | 2 | AAVVHGAELR              | 42d | 18 |
| FBgn0002921 | 695.78  | 78  | 1 | DVSSDQLDEILR            | 42d | 18 |
| FBgn0002921 | 886.31  | 73  | 4 | EAFNNAYMELGGLGER        | 42d | 18 |
| FBgn0002921 | 987     | 56  | 1 | ENLDDLKQELDIDFHK        | 42d | 18 |
| FBgn0002921 | 847.82  | 80  | 4 | FNTDDINFPIDNLR          | 42d | 18 |
| FBgn0002921 | 682.27  | 72  | 2 | FVGLMSMIDPPR            | 42d | 18 |

|             |         |     |   |                              |     |    |
|-------------|---------|-----|---|------------------------------|-----|----|
| FBgn0002921 | 737.24  | 76  | 3 | GAEFTHENPLETK                | 42d | 18 |
| FBgn0002921 | 808.07  | 74  | 2 | IAGLASGLDTGETPIAK            | 42d | 18 |
| FBgn0002921 | 568.23  | 53  | 2 | ISPEELYQR                    | 42d | 18 |
| FBgn0002921 | 810.41  | 78  | 2 | KADIGVAMGIAGSDVSK            | 42d | 18 |
| FBgn0002921 | 619.83  | 67  | 4 | LNIPVSEVNPR                  | 42d | 18 |
| FBgn0002921 | 1101.23 | 57  | 2 | MTVAHMWFDNQIIEADTTEDQSGVQYDR | 42d | 18 |
| FBgn0002921 | 1232.64 | 79  | 6 | QAADMILLDDNFASIVTGVEEGR      | 42d | 18 |
| FBgn0002921 | 807.45  | 80  | 5 | RNPGGWLEQETY                 | 42d | 18 |
| FBgn0002921 | 959.67  | 111 | 3 | SVGIISEGNETVEDIAQR           | 42d | 18 |
| FBgn0002921 | 803.82  | 75  | 3 | VDNSSLTGESEPQSR              | 42d | 18 |
| FBgn0002921 | 691.93  | 66  | 2 | VIMVTGDHPITAK                | 42d | 18 |
| FBgn0002921 | 902.82  | 45  | 1 | YQVSIHETEDTNDPR              | 42d | 18 |
| FBgn0002921 | 512.33  | 46  | 2 | AAVVHGAELR                   | 62d | 18 |
| FBgn0002921 | 695.75  | 81  | 2 | DVSSDQLDEILR                 | 62d | 18 |
| FBgn0002921 | 848.14  | 49  | 2 | FNTDDINFPIDNLR               | 62d | 18 |
| FBgn0002921 | 737.58  | 70  | 2 | GAEFTHENPLETK                | 62d | 18 |
| FBgn0002921 | 808.06  | 78  | 2 | IAGLASGLDTGETPIAK            | 62d | 18 |
| FBgn0002921 | 568.2   | 44  | 1 | ISPEELYQR                    | 62d | 18 |
| FBgn0002921 | 432.16  | 41  | 2 | LIFDNLK                      | 62d | 18 |
| FBgn0002921 | 619.77  | 67  | 4 | LNIPVSEVNPR                  | 62d | 18 |
| FBgn0002921 | 807.34  | 43  | 2 | RNPGGWLEQETY                 | 62d | 18 |
| FBgn0002921 | 959.46  | 111 | 1 | SVGIISEGNETVEDIAQR           | 62d | 18 |
| FBgn0002921 | 445.9   | 46  | 1 | TGTLTQNR                     | 62d | 18 |
| FBgn0002921 | 803.74  | 101 | 2 | VDNSSLTGESEPQSR              | 62d | 18 |
| FBgn0002921 | 902.77  | 42  | 1 | YQVSIHETEDTNDPR              | 62d | 18 |
| FBgn0002921 | 512.42  | 46  | 2 | AAVVHGAELR                   | 82d | 18 |
| FBgn0002921 | 693.83  | 75  | 2 | AEDLVLGDVVEVK                | 82d | 18 |
| FBgn0002921 | 695.97  | 72  | 1 | DVSSDQLDEILR                 | 82d | 18 |
| FBgn0002921 | 886.51  | 92  | 2 | EAFNNAYMELGGLGER             | 82d | 18 |
| FBgn0002921 | 847.59  | 56  | 1 | FNTDDINFPIDNLR               | 82d | 18 |
| FBgn0002921 | 737.29  | 70  | 3 | GAEFTHENPLETK                | 82d | 18 |
| FBgn0002921 | 610.66  | 49  | 1 | IAEVPFNSTNK                  | 82d | 18 |

|             |         |     |   |                         |      |    |
|-------------|---------|-----|---|-------------------------|------|----|
| FBgn0002921 | 808.03  | 68  | 2 | IAGLASGLDTGETPIAK       | 82d  | 18 |
| FBgn0002921 | 568.17  | 43  | 1 | ISPEELYQR               | 82d  | 18 |
| FBgn0002921 | 810.42  | 40  | 1 | KADIGVAMGIAGSDVSK       | 82d  | 18 |
| FBgn0002921 | 619.95  | 43  | 1 | LNIPVSEVNPR             | 82d  | 18 |
| FBgn0002921 | 908.36  | 75  | 2 | MGAIVAVTGDGVNDSPALK     | 82d  | 18 |
| FBgn0002921 | 959.45  | 110 | 1 | SVGIISEGNETVEDIAQR      | 82d  | 18 |
| FBgn0002921 | 803.98  | 82  | 2 | VDNSSLTGESEPQSR         | 82d  | 18 |
| FBgn0002921 | 691.92  | 53  | 1 | VIMVTGDHPITAK           | 82d  | 18 |
| FBgn0002921 | 902.72  | 61  | 3 | YQVSIHETEDTNDPR         | 82d  | 18 |
| FBgn0002921 | 695.99  | 78  | 2 | DVSSDQLDEILR            | 102d | 18 |
| FBgn0002921 | 886.65  | 64  | 1 | EAFNNAYMELGGLGER        | 102d | 18 |
| FBgn0002921 | 987     | 65  | 1 | ENLDDLKQELDIDFHK        | 102d | 18 |
| FBgn0002921 | 847.96  | 56  | 1 | FNTDDINFPIDNLR          | 102d | 18 |
| FBgn0002921 | 737.45  | 59  | 1 | GAEFTHENPLETK           | 102d | 18 |
| FBgn0002921 | 1233.32 | 86  | 1 | QAADMILLDDNFASIVTGVEEGR | 102d | 18 |
| FBgn0002921 | 807.43  | 47  | 3 | RNPGGWLEQETY            | 102d | 18 |
| FBgn0002921 | 959.39  | 103 | 3 | SVGIISEGNETVEDIAQR      | 102d | 18 |
| FBgn0002921 | 803.83  | 108 | 3 | VDNSSLTGESEPQSR         | 102d | 18 |
| FBgn0002921 | 902.67  | 53  | 1 | YQVSIHETEDTNDPR         | 102d | 18 |
| FBgn0002921 | 693.7   | 61  | 1 | AEDLVLGDVVEVK           | 112d | 18 |
| FBgn0002921 | 696.03  | 68  | 2 | DVSSDQLDEILR            | 112d | 18 |
| FBgn0002921 | 807.88  | 67  | 2 | IAGLASGLDTGETPIAK       | 112d | 18 |
| FBgn0002921 | 568.2   | 61  | 1 | ISPEELYQR               | 112d | 18 |
| FBgn0002921 | 908.69  | 70  | 1 | MGAIVAVTGDGVNDSPALK     | 112d | 18 |
| FBgn0002921 | 806.98  | 57  | 3 | RNPGGWLEQETY            | 112d | 18 |
| FBgn0002921 | 959.44  | 101 | 2 | SVGIISEGNETVEDIAQR      | 112d | 18 |
| FBgn0002921 | 446.01  | 45  | 3 | TGTLTQNR                | 112d | 18 |
| FBgn0002921 | 903.11  | 47  | 1 | YQVSIHETEDTNDPR         | 112d | 18 |
| FBgn0002921 | 694.02  | 44  | 1 | AEDLVLGDVVEVK           | 122d | 18 |
| FBgn0002921 | 695.72  | 63  | 1 | DVSSDQLDEILR            | 122d | 18 |
| FBgn0002921 | 886.35  | 62  | 3 | EAFNNAYMELGGLGER        | 122d | 18 |
| FBgn0002921 | 737.35  | 68  | 1 | GAEFTHENPLETK           | 122d | 18 |



|             |         |     |   |                         |      |    |
|-------------|---------|-----|---|-------------------------|------|----|
| FBgn0002921 | 807.87  | 53  | 1 | IAGLASGLDTGETPIAK       | 122d | 18 |
| FBgn0002921 | 568.35  | 40  | 1 | ISPEELYQR               | 122d | 18 |
| FBgn0002921 | 810.47  | 118 | 1 | KADIGVAMGIAGSDVSK       | 122d | 18 |
| FBgn0002921 | 432.32  | 41  | 1 | LIFDNLK                 | 122d | 18 |
| FBgn0002921 | 908.5   | 39  | 1 | MGAIVAVTGDGVNDSPALK     | 122d | 18 |
| FBgn0002921 | 1233.27 | 65  | 1 | QAADMILLDDNFASIVTGVEEGR | 122d | 18 |
| FBgn0002921 | 807.49  | 50  | 3 | RNPGGWLEQETYY           | 122d | 18 |
| FBgn0002921 | 803.75  | 70  | 1 | VDNSSLTGESEPQSR         | 122d | 18 |
| FBgn0002921 | 902.78  | 68  | 1 | YQVSIHETEDTNDPR         | 122d | 18 |
| FBgn0002921 | 886.33  | 64  | 3 | EAFNNAYMELGGLGER        | 132d | 18 |
| FBgn0002921 | 646.06  | 66  | 1 | EVSGDASEAALLK           | 132d | 18 |
| FBgn0002921 | 737.43  | 56  | 1 | GAEFTHENPLETK           | 132d | 18 |
| FBgn0002921 | 611.04  | 34  | 1 | IAEVPFNSTNK             | 132d | 18 |
| FBgn0002921 | 808.18  | 53  | 1 | IAGLASGLDTGETPIAK       | 132d | 18 |
| FBgn0002921 | 568.22  | 47  | 1 | ISPEELYQR               | 132d | 18 |
| FBgn0002921 | 619.79  | 45  | 2 | LNIPVSEVNPR             | 132d | 18 |
| FBgn0002921 | 959.4   | 95  | 2 | SVGIISEGNETVEDIAQR      | 132d | 18 |
| FBgn0002921 | 902.92  | 49  | 1 | YQVSIHETEDTNDPR         | 132d | 18 |
| FBgn0002921 | 695.68  | 70  | 1 | DVSSDQLDEILR            | 142d | 18 |
| FBgn0002921 | 848.1   | 43  | 1 | FNTDDINFPIDNLR          | 142d | 18 |
| FBgn0002921 | 737.38  | 53  | 2 | GAEFTHENPLETK           | 142d | 18 |
| FBgn0002921 | 807.38  | 47  | 2 | RNPGGWLEQETYY           | 142d | 18 |
| FBgn0002921 | 959.52  | 57  | 1 | SVGIISEGNETVEDIAQR      | 142d | 18 |
| FBgn0002921 | 803.74  | 47  | 1 | VDNSSLTGESEPQSR         | 142d | 18 |
| FBgn0002921 | 691.75  | 47  | 1 | VIMVTGDHPITAK           | 142d | 18 |
| FBgn0002921 | 505.46  | 62  | 5 | DGNALTPPK               | 2d   | 28 |
| FBgn0002921 | 695.55  | 78  | 3 | DVSSDQLDEILR            | 2d   | 28 |
| FBgn0002921 | 886.12  | 76  | 4 | EAFNNAYMELGGLGER        | 2d   | 28 |
| FBgn0002921 | 645.95  | 60  | 2 | EVSGDASEAALLK           | 2d   | 28 |
| FBgn0002921 | 737.36  | 64  | 3 | GAEFTHENPLETK           | 2d   | 28 |
| FBgn0002921 | 744.89  | 96  | 2 | GVVISCGDHTVMGR          | 2d   | 28 |
| FBgn0002921 | 610.8   | 62  | 7 | IAEVPFNSTNK             | 2d   | 28 |

|             |         |     |   |                         |     |    |
|-------------|---------|-----|---|-------------------------|-----|----|
| FBgn0002921 | 807.86  | 84  | 2 | IAGLASGLDTGETPIAK       | 2d  | 28 |
| FBgn0002921 | 568.1   | 34  | 1 | ISPEELYQR               | 2d  | 28 |
| FBgn0002921 | 810.43  | 106 | 3 | KADIGVAMGIAGSDVSK       | 2d  | 28 |
| FBgn0002921 | 432.09  | 36  | 1 | LIFDNLK                 | 2d  | 28 |
| FBgn0002921 | 619.62  | 69  | 4 | LNIPVSEVNPR             | 2d  | 28 |
| FBgn0002921 | 908.59  | 87  | 3 | MGAIVAVTGDGVNDSPALK     | 2d  | 28 |
| FBgn0002921 | 1232.97 | 62  | 1 | QAADMILLDDNFASIVTGVEEGR | 2d  | 28 |
| FBgn0002921 | 807.62  | 69  | 3 | RNPGGWLEQETYY           | 2d  | 28 |
| FBgn0002921 | 959.69  | 130 | 3 | SVGIISEGNETVEDIAQR      | 2d  | 28 |
| FBgn0002921 | 804.08  | 82  | 6 | VDNSSLTGESEPQSR         | 2d  | 28 |
| FBgn0002921 | 692.04  | 69  | 2 | VIMVTGDHPITAK           | 2d  | 28 |
| FBgn0002921 | 902.74  | 72  | 3 | YQVSIHETEDTNDPR         | 2d  | 28 |
| FBgn0002921 | 505.61  | 50  | 1 | DGPNALTPPK              | 12d | 28 |
| FBgn0002921 | 695.78  | 75  | 3 | DVSSDQLDEILR            | 12d | 28 |
| FBgn0002921 | 886.52  | 75  | 3 | EAFNNAYMELGGLGER        | 12d | 28 |
| FBgn0002921 | 645.78  | 54  | 2 | EVSGDASEAALLK           | 12d | 28 |
| FBgn0002921 | 848.13  | 44  | 2 | FNTDDINFPIDNLR          | 12d | 28 |
| FBgn0002921 | 492     | 69  | 2 | GAEFTHENPLETK           | 12d | 28 |
| FBgn0002921 | 744.92  | 66  | 1 | GVVISCGDHTVMGR          | 12d | 28 |
| FBgn0002921 | 610.99  | 48  | 3 | IAEVPFNSTNK             | 12d | 28 |
| FBgn0002921 | 568.25  | 41  | 1 | ISPEELYQR               | 12d | 28 |
| FBgn0002921 | 810.45  | 106 | 2 | KADIGVAMGIAGSDVSK       | 12d | 28 |
| FBgn0002921 | 619.78  | 68  | 4 | LNIPVSEVNPR             | 12d | 28 |
| FBgn0002921 | 908.29  | 122 | 3 | MGAIVAVTGDGVNDSPALK     | 12d | 28 |
| FBgn0002921 | 638.89  | 39  | 2 | NMVPQFATVIR             | 12d | 28 |
| FBgn0002921 | 1232.94 | 58  | 2 | QAADMILLDDNFASIVTGVEEGR | 12d | 28 |
| FBgn0002921 | 807.49  | 50  | 2 | RNPGGWLEQETYY           | 12d | 28 |
| FBgn0002921 | 959.53  | 111 | 3 | SVGIISEGNETVEDIAQR      | 12d | 28 |
| FBgn0002921 | 803.63  | 73  | 3 | VDNSSLTGESEPQSR         | 12d | 28 |
| FBgn0002921 | 691.92  | 66  | 2 | VIMVTGDHPITAK           | 12d | 28 |
| FBgn0002921 | 902.72  | 62  | 3 | YQVSIHETEDTNDPR         | 12d | 28 |
| FBgn0002921 | 695.83  | 82  | 3 | DVSSDQLDEILR            | 22d | 28 |

|             |        |     |   |                     |     |    |
|-------------|--------|-----|---|---------------------|-----|----|
| FBgn0002921 | 886.48 | 71  | 3 | EAFNNAYMELGGLGER    | 22d | 28 |
| FBgn0002921 | 847.46 | 62  | 4 | FNTDDINFPIDNLR      | 22d | 28 |
| FBgn0002921 | 737.21 | 65  | 2 | GAEFTHENPLETK       | 22d | 28 |
| FBgn0002921 | 807.76 | 58  | 1 | IAGLASGLDTGETPIAK   | 22d | 28 |
| FBgn0002921 | 807.4  | 46  | 3 | RNPGGWLEQETYY       | 22d | 28 |
| FBgn0002921 | 959.39 | 96  | 1 | SVGIISEGNETVEDIAQR  | 22d | 28 |
| FBgn0002921 | 691.78 | 63  | 2 | VIMVTGDHPITAK       | 22d | 28 |
| FBgn0002921 | 902.68 | 65  | 2 | YQVSIHETEDTNDPR     | 22d | 28 |
| FBgn0002921 | 693.82 | 55  | 1 | AEDLVLGDVVEVK       | 32d | 28 |
| FBgn0002921 | 695.95 | 85  | 2 | DVSSDQLDEILR        | 32d | 28 |
| FBgn0002921 | 886.66 | 89  | 5 | EAFNNAYMELGGLGER    | 32d | 28 |
| FBgn0002921 | 645.83 | 85  | 2 | EVSGDASEAALLK       | 32d | 28 |
| FBgn0002921 | 847.8  | 65  | 4 | FNTDDINFPIDNLR      | 32d | 28 |
| FBgn0002921 | 737.17 | 83  | 3 | GAEFTHENPLETK       | 32d | 28 |
| FBgn0002921 | 808.04 | 62  | 3 | IAGLASGLDTGETPIAK   | 32d | 28 |
| FBgn0002921 | 568.19 | 46  | 3 | ISPEELYQR           | 32d | 28 |
| FBgn0002921 | 619.82 | 75  | 3 | LNIPVSEVNPR         | 32d | 28 |
| FBgn0002921 | 908.37 | 118 | 2 | MGAIVAVTGDGVNDSPALK | 32d | 28 |
| FBgn0002921 | 959.47 | 111 | 1 | SVGIISEGNETVEDIAQR  | 32d | 28 |
| FBgn0002921 | 803.71 | 54  | 2 | VDNSSLTGESEPQSR     | 32d | 28 |
| FBgn0002921 | 691.98 | 49  | 1 | VIMVTGDHPITAK       | 32d | 28 |
| FBgn0002921 | 693.77 | 42  | 1 | AEDLVLGDVVEVK       | 36d | 28 |
| FBgn0002921 | 695.48 | 71  | 2 | DVSSDQLDEILR        | 36d | 28 |
| FBgn0002921 | 886.22 | 83  | 5 | EAFNNAYMELGGLGER    | 36d | 28 |
| FBgn0002921 | 848.05 | 67  | 1 | FNTDDINFPIDNLR      | 36d | 28 |
| FBgn0002921 | 808.13 | 76  | 2 | IAGLASGLDTGETPIAK   | 36d | 28 |
| FBgn0002921 | 619.7  | 66  | 2 | LNIPVSEVNPR         | 36d | 28 |
| FBgn0002921 | 807.45 | 42  | 1 | RNPGGWLEQETYY       | 36d | 28 |
| FBgn0002921 | 695.96 | 75  | 3 | DVSSDQLDEILR        | 42d | 28 |
| FBgn0002921 | 886.22 | 82  | 5 | EAFNNAYMELGGLGER    | 42d | 28 |
| FBgn0002921 | 645.81 | 81  | 2 | EVSGDASEAALLK       | 42d | 28 |
| FBgn0002921 | 848.11 | 65  | 4 | FNTDDINFPIDNLR      | 42d | 28 |

|             |        |     |   |                     |     |    |
|-------------|--------|-----|---|---------------------|-----|----|
| FBgn0002921 | 737.31 | 82  | 3 | GAEFTHENPLETK       | 42d | 28 |
| FBgn0002921 | 807.78 | 71  | 3 | IAGLASGLDTGETPIAK   | 42d | 28 |
| FBgn0002921 | 568.23 | 41  | 2 | ISPEELYQR           | 42d | 28 |
| FBgn0002921 | 619.79 | 75  | 1 | LNIPVSEVNPR         | 42d | 28 |
| FBgn0002921 | 908.41 | 64  | 1 | MGAIVAVTGDGVNDSPALK | 42d | 28 |
| FBgn0002921 | 959.41 | 117 | 3 | SVGIISEGNETVEDIAQR  | 42d | 28 |
| FBgn0002921 | 803.48 | 58  | 3 | VDNSSLTGESEPQSR     | 42d | 28 |
| FBgn0002921 | 694.05 | 53  | 1 | AEDLVLGDVVEVK       | 46d | 28 |
| FBgn0002921 | 696.05 | 70  | 3 | DVSSDQLDEILR        | 46d | 28 |
| FBgn0002921 | 886.31 | 77  | 4 | EAFNNAYMELGGLGER    | 46d | 28 |
| FBgn0002921 | 645.73 | 73  | 3 | EVSGDASEAALLK       | 46d | 28 |
| FBgn0002921 | 848.14 | 74  | 3 | FNTDDINFPIDNLR      | 46d | 28 |
| FBgn0002921 | 737.13 | 82  | 2 | GAEFTHENPLETK       | 46d | 28 |
| FBgn0002921 | 807.81 | 76  | 3 | IAGLASGLDTGETPIAK   | 46d | 28 |
| FBgn0002921 | 568.25 | 49  | 3 | ISPEELYQR           | 46d | 28 |
| FBgn0002921 | 810.25 | 59  | 1 | KADIGVAMGIAGSDVSK   | 46d | 28 |
| FBgn0002921 | 908.4  | 109 | 2 | MGAIVAVTGDGVNDSPALK | 46d | 28 |
| FBgn0002921 | 807.45 | 57  | 2 | RNPGGWLEQETY        | 46d | 28 |
| FBgn0002921 | 959.31 | 130 | 3 | SVGIISEGNETVEDIAQR  | 46d | 28 |
| FBgn0002921 | 695.93 | 79  | 3 | DVSSDQLDEILR        | 50d | 28 |
| FBgn0002921 | 886.37 | 63  | 4 | EAFNNAYMELGGLGER    | 50d | 28 |
| FBgn0002921 | 645.65 | 78  | 2 | EVSGDASEAALLK       | 50d | 28 |
| FBgn0002921 | 847.86 | 79  | 4 | FNTDDINFPIDNLR      | 50d | 28 |
| FBgn0002921 | 737.16 | 69  | 3 | GAEFTHENPLETK       | 50d | 28 |
| FBgn0002921 | 808.11 | 74  | 3 | IAGLASGLDTGETPIAK   | 50d | 28 |
| FBgn0002921 | 567.77 | 34  | 1 | ISPEELYQR           | 50d | 28 |
| FBgn0002921 | 810.22 | 52  | 1 | KADIGVAMGIAGSDVSK   | 50d | 28 |
| FBgn0002921 | 619.82 | 58  | 2 | LNIPVSEVNPR         | 50d | 28 |
| FBgn0002921 | 807.6  | 58  | 4 | RNPGGWLEQETY        | 50d | 28 |
| FBgn0002921 | 959.72 | 129 | 3 | SVGIISEGNETVEDIAQR  | 50d | 28 |
| FBgn0002921 | 803.91 | 82  | 2 | VDNSSLTGESEPQSR     | 50d | 28 |
| FBgn0002921 | 692.02 | 55  | 1 | VIMVTGDHPITAK       | 50d | 28 |

|             |         |     |   |                        |     |    |
|-------------|---------|-----|---|------------------------|-----|----|
| FBgn0002921 | 902.72  | 45  | 1 | YQVSIHETEDTNDPR        | 50d | 28 |
| FBgn0002921 | 696.01  | 76  | 2 | DVSSDQLDEILR           | 52d | 28 |
| FBgn0002921 | 847.99  | 65  | 2 | FNTDDINFPIDNLR         | 52d | 28 |
| FBgn0002921 | 737.27  | 51  | 1 | GAEFTHENPLETK          | 52d | 28 |
| FBgn0002921 | 810.49  | 80  | 2 | KADIGVAMGIAGSDVSK      | 52d | 28 |
| FBgn0002921 | 619.94  | 54  | 3 | LNIPVSEVNPR            | 52d | 28 |
| FBgn0002921 | 908.3   | 101 | 2 | MGAIVAVTGDGVNDSPALK    | 52d | 28 |
| FBgn0002921 | 639.01  | 38  | 1 | NMVPQFATVIR            | 52d | 28 |
| FBgn0002921 | 807.27  | 50  | 3 | RNPGGWLEQETY           | 52d | 28 |
| FBgn0002921 | 902.65  | 57  | 3 | YQVSIHETEDTNDPR        | 52d | 28 |
| FBgn0002921 | 694.08  | 49  | 1 | AEDLVLGDVVEVK          | 56d | 28 |
| FBgn0002921 | 695.89  | 73  | 2 | DVSSDQLDEILR           | 56d | 28 |
| FBgn0002921 | 886.53  | 70  | 2 | EAFNNAYMELGGLGER       | 56d | 28 |
| FBgn0002921 | 847.77  | 68  | 4 | FNTDDINFPIDNLR         | 56d | 28 |
| FBgn0002921 | 619.67  | 57  | 1 | LNIPVSEVNPR            | 56d | 28 |
| FBgn0002921 | 807.49  | 42  | 2 | RNPGGWLEQETY           | 56d | 28 |
| FBgn0002921 | 959.7   | 95  | 1 | SVGIISEGNETVEDIAQR     | 56d | 28 |
| FBgn0002921 | 803.81  | 54  | 1 | VDNSSLTGESEPQSR        | 56d | 28 |
| FBgn0002930 | 791.71  | 50  | 1 | ELGGVNHSYDEYAK         | 2d  | 18 |
| FBgn0002938 | 772.29  | 43  | 1 | AGNLTMPFEAVQHK         | 2d  | 18 |
| FBgn0002938 | 564.7   | 53  | 2 | ALGVLDTVIAR            | 2d  | 18 |
| FBgn0002938 | 816.21  | 40  | 1 | EPQHIVLSGESYSGK        | 2d  | 18 |
| FBgn0002938 | 1237.63 | 51  | 1 | LDQIPFYDTQYMVDPANSISR  | 2d  | 18 |
| FBgn0002938 | 519.14  | 40  | 2 | LPFDEFLR               | 2d  | 18 |
| FBgn0002938 | 495.66  | 54  | 2 | LVDFIINR               | 2d  | 18 |
| FBgn0002938 | 847.88  | 53  | 1 | MGESDNIYNQGYFR         | 2d  | 18 |
| FBgn0002938 | 1266.85 | 71  | 2 | MYPEDLAALENPVDENIIESLR | 2d  | 18 |
| FBgn0002938 | 631.25  | 59  | 3 | QEFQEFHAK              | 2d  | 18 |
| FBgn0002938 | 1069.24 | 73  | 2 | RYQFLAFDFDEPVEMTK      | 2d  | 18 |
| FBgn0002938 | 1226.65 | 69  | 2 | TALDNLLTKPDGLFYIIDASR  | 2d  | 18 |
| FBgn0002938 | 755.75  | 64  | 2 | TLYKEPELFDVDR          | 2d  | 18 |
| FBgn0002938 | 698.87  | 88  | 2 | YAEVENTDIVSR           | 2d  | 18 |

|             |         |     |   |                          |     |    |
|-------------|---------|-----|---|--------------------------|-----|----|
| FBgn0002938 | 1000.15 | 112 | 2 | YQDDEGYNSSSGNYGVSR       | 2d  | 18 |
| FBgn0002938 | 596.31  | 62  | 3 | YYNDEFLAR                | 2d  | 18 |
| FBgn0002938 | 564.99  | 61  | 2 | ALGVLDTVIAR              | 22d | 18 |
| FBgn0002938 | 518.97  | 42  | 1 | LPFDEFLR                 | 22d | 18 |
| FBgn0002938 | 805.78  | 56  | 1 | NEGDNSDPPFNFK            | 22d | 18 |
| FBgn0002938 | 698.85  | 95  | 3 | YAEVENTDIVSR             | 22d | 18 |
| FBgn0002938 | 771.16  | 36  | 1 | AGNLTMPFEAVQHK           | 42d | 18 |
| FBgn0002938 | 564.75  | 66  | 3 | ALGVLDTVIAR              | 42d | 18 |
| FBgn0002938 | 741.2   | 47  | 2 | DFVPPMIETFR              | 42d | 18 |
| FBgn0002938 | 816.36  | 41  | 1 | EPQHIVLSGESYS GK         | 42d | 18 |
| FBgn0002938 | 519.5   | 38  | 2 | LPFDEFLR                 | 42d | 18 |
| FBgn0002938 | 496     | 52  | 2 | LVDFIINR                 | 42d | 18 |
| FBgn0002938 | 1266.86 | 81  | 2 | MYPEDLAALENPV DENIIESLR  | 42d | 18 |
| FBgn0002938 | 632.77  | 74  | 3 | SDIAEMLELSR              | 42d | 18 |
| FBgn0002938 | 1226.87 | 58  | 2 | TALDNLLTKPDGLFYIID D ASR | 42d | 18 |
| FBgn0002938 | 755.95  | 44  | 1 | TLYKEPEL FVDR            | 42d | 18 |
| FBgn0002938 | 990.98  | 86  | 1 | YQFLAFDFDEPVEMTK         | 42d | 18 |
| FBgn0002938 | 596.04  | 55  | 2 | YYNDEFLAR                | 42d | 18 |
| FBgn0002938 | 496.99  | 36  | 1 | ADLEYKPR                 | 62d | 18 |
| FBgn0002938 | 565.05  | 63  | 2 | ALGVLDTVIAR              | 62d | 18 |
| FBgn0002938 | 816.14  | 36  | 1 | EPQHIVLSGESYS GK         | 62d | 18 |
| FBgn0002938 | 790.08  | 59  | 1 | EVNSSQLGPLPVPIK          | 62d | 18 |
| FBgn0002938 | 519.28  | 40  | 2 | LPFDEFLR                 | 62d | 18 |
| FBgn0002938 | 499.85  | 38  | 1 | QYTTEEAR                 | 62d | 18 |
| FBgn0002938 | 1226.6  | 48  | 1 | TALDNLLTKPDGLFYIID D ASR | 62d | 18 |
| FBgn0002938 | 698.85  | 58  | 1 | YAEVENTDIVSR             | 62d | 18 |
| FBgn0002938 | 596.23  | 60  | 3 | YYNDEFLAR                | 62d | 18 |
| FBgn0002938 | 496.6   | 51  | 2 | ADLEYKPR                 | 82d | 18 |
| FBgn0002938 | 564.52  | 79  | 2 | ALGVLDTVIAR              | 82d | 18 |
| FBgn0002938 | 853.86  | 42  | 1 | EVNSSQLGPLPVPIK          | 82d | 18 |
| FBgn0002938 | 518.92  | 46  | 3 | LPFDEFLR                 | 82d | 18 |
| FBgn0002938 | 1266.47 | 76  | 1 | MYPEDLAALENPV DENIIESLR  | 82d | 18 |

|             |         |    |   |                          |      |    |
|-------------|---------|----|---|--------------------------|------|----|
| FBgn0002938 | 698.81  | 71 | 3 | YAEVENTDIVSR             | 82d  | 18 |
| FBgn0002938 | 596.17  | 47 | 3 | YYNDEFLAR                | 82d  | 18 |
| FBgn0002938 | 564.51  | 63 | 3 | ALGVLDTVIAR              | 102d | 18 |
| FBgn0002938 | 519.09  | 37 | 1 | LPFDEFLR                 | 102d | 18 |
| FBgn0002938 | 495.71  | 48 | 1 | LVDFIINR                 | 102d | 18 |
| FBgn0002938 | 1266.82 | 73 | 3 | MYPEDLAALENPVDENIIESLR   | 102d | 18 |
| FBgn0002938 | 1226.62 | 41 | 1 | TALDNLLTKPDGLFYIIDDASR   | 102d | 18 |
| FBgn0002938 | 564.92  | 65 | 2 | ALGVLDTVIAR              | 112d | 18 |
| FBgn0002938 | 1435.54 | 34 | 1 | EYDEEHIDISETPSEAEEMFLEAR | 112d | 18 |
| FBgn0002938 | 518.66  | 38 | 2 | LPFDEFLR                 | 112d | 18 |
| FBgn0002938 | 495.69  | 51 | 2 | LVDFIINR                 | 112d | 18 |
| FBgn0002938 | 1266.52 | 90 | 3 | MYPEDLAALENPVDENIIESLR   | 112d | 18 |
| FBgn0002938 | 564.22  | 66 | 1 | ALGVLDTVIAR              | 122d | 18 |
| FBgn0002938 | 519.26  | 46 | 1 | LPFDEFLR                 | 122d | 18 |
| FBgn0002938 | 496.01  | 65 | 2 | LVDFIINR                 | 122d | 18 |
| FBgn0002938 | 1266.85 | 68 | 1 | MYPEDLAALENPVDENIIESLR   | 122d | 18 |
| FBgn0002938 | 596.37  | 55 | 1 | YYNDEFLAR                | 122d | 18 |
| FBgn0002938 | 564.8   | 56 | 1 | ALGVLDTVIAR              | 132d | 18 |
| FBgn0002938 | 853.94  | 40 | 1 | EVNSSQLGPLPVIKK          | 132d | 18 |
| FBgn0002938 | 519.37  | 38 | 1 | LPFDEFLR                 | 132d | 18 |
| FBgn0002938 | 495.56  | 56 | 1 | LVDFIINR                 | 132d | 18 |
| FBgn0002938 | 847.71  | 78 | 1 | MGESDNIYNQGYFR           | 132d | 18 |
| FBgn0002938 | 1226.89 | 45 | 1 | TALDNLLTKPDGLFYIIDDASR   | 132d | 18 |
| FBgn0002938 | 756.01  | 52 | 3 | TLYKEPELFVDR             | 132d | 18 |
| FBgn0002938 | 999.86  | 96 | 1 | YQDDEGYNSSSGNYGVSR       | 132d | 18 |
| FBgn0002938 | 564.78  | 69 | 2 | ALGVLDTVIAR              | 142d | 18 |
| FBgn0002938 | 519.19  | 47 | 3 | LPFDEFLR                 | 142d | 18 |
| FBgn0002938 | 495.86  | 66 | 3 | LVDFIINR                 | 142d | 18 |
| FBgn0002938 | 1266.55 | 89 | 2 | MYPEDLAALENPVDENIIESLR   | 142d | 18 |
| FBgn0002938 | 1226.84 | 44 | 1 | TALDNLLTKPDGLFYIIDDASR   | 142d | 18 |
| FBgn0002938 | 999.86  | 67 | 1 | YQDDEGYNSSSGNYGVSR       | 142d | 18 |
| FBgn0002938 | 596.46  | 42 | 1 | YYNDEFLAR                | 142d | 18 |

|             |         |     |   |                          |     |    |
|-------------|---------|-----|---|--------------------------|-----|----|
| FBgn0002938 | 515.12  | 52  | 2 | AGNLTMPFEAVQHK           | 2d  | 28 |
| FBgn0002938 | 772.28  | 42  | 1 | AGNLTMPFEAVQHK           | 2d  | 28 |
| FBgn0002938 | 564.96  | 66  | 3 | ALGVLDTVIAR              | 2d  | 28 |
| FBgn0002938 | 741.25  | 43  | 1 | DFVPPMIETFR              | 2d  | 28 |
| FBgn0002938 | 544.7   | 43  | 1 | EPQHIVLSGESYSGK          | 2d  | 28 |
| FBgn0002938 | 790.13  | 40  | 1 | EVNSSQLGPLVPIK           | 2d  | 28 |
| FBgn0002938 | 854.17  | 55  | 5 | EVNSSQLGPLVPIKK          | 2d  | 28 |
| FBgn0002938 | 751.03  | 54  | 2 | GSDSGDQHTFQPPK           | 2d  | 28 |
| FBgn0002938 | 1237.56 | 64  | 2 | LDQIPFYDTQYMVDPANSISR    | 2d  | 28 |
| FBgn0002938 | 519.19  | 46  | 3 | LPFDEFLR                 | 2d  | 28 |
| FBgn0002938 | 495.71  | 52  | 3 | LVDFIINR                 | 2d  | 28 |
| FBgn0002938 | 847.91  | 68  | 2 | MGESDNIYNQGYFR           | 2d  | 28 |
| FBgn0002938 | 793.79  | 74  | 1 | MLSQANANLGVHFVR          | 2d  | 28 |
| FBgn0002938 | 1266.34 | 68  | 2 | MYPEDLAALENPVDENIIESLR   | 2d  | 28 |
| FBgn0002938 | 805.99  | 53  | 1 | NEGDNSDPPFNFK            | 2d  | 28 |
| FBgn0002938 | 631.27  | 39  | 2 | QEFPQEFHAK               | 2d  | 28 |
| FBgn0002938 | 499.55  | 35  | 1 | QYTTEEAR                 | 2d  | 28 |
| FBgn0002938 | 1068.99 | 42  | 1 | RYQFLAFDFDEPVEMTK        | 2d  | 28 |
| FBgn0002938 | 632.87  | 77  | 2 | SDIAEMLELSR              | 2d  | 28 |
| FBgn0002938 | 1226.7  | 46  | 1 | TALDNLLTKPDGLFYIIDASR    | 2d  | 28 |
| FBgn0002938 | 755.9   | 40  | 2 | TLYKEPELFDVDR            | 2d  | 28 |
| FBgn0002938 | 475.57  | 37  | 1 | VPPEVPPSK                | 2d  | 28 |
| FBgn0002938 | 698.82  | 88  | 4 | YAEVENTDIVSR             | 2d  | 28 |
| FBgn0002938 | 999.77  | 125 | 3 | YQDDEGYNSSSGNYGVSR       | 2d  | 28 |
| FBgn0002938 | 596.43  | 57  | 3 | YYNDEFLAR                | 2d  | 28 |
| FBgn0002938 | 564.75  | 60  | 1 | ALGVLDTVIAR              | 12d | 28 |
| FBgn0002938 | 789.93  | 38  | 1 | EVNSSQLGPLVPIK           | 12d | 28 |
| FBgn0002938 | 853.94  | 49  | 1 | EVNSSQLGPLVPIKK          | 12d | 28 |
| FBgn0002938 | 1435.6  | 43  | 2 | EYDEEHIDISETPSEAEEMFLEAR | 12d | 28 |
| FBgn0002938 | 751.16  | 51  | 3 | GSDSGDQHTFQPPK           | 12d | 28 |
| FBgn0002938 | 1237.57 | 36  | 1 | LDQIPFYDTQYMVDPANSISR    | 12d | 28 |
| FBgn0002938 | 518.67  | 49  | 2 | LPFDEFLR                 | 12d | 28 |



|             |         |    |   |                              |     |    |
|-------------|---------|----|---|------------------------------|-----|----|
| FBgn0002938 | 496     | 52 | 3 | LVDFIINR                     | 12d | 28 |
| FBgn0002938 | 847.77  | 51 | 1 | MGESDNIYNQGYFR               | 12d | 28 |
| FBgn0002938 | 793.96  | 61 | 1 | MLSQNANLGVHFVR               | 12d | 28 |
| FBgn0002938 | 1266.38 | 85 | 1 | MYPEDLAALENPVDENIIESLR       | 12d | 28 |
| FBgn0002938 | 1069.22 | 67 | 1 | RYQFLAFDFDEPVEMTK            | 12d | 28 |
| FBgn0002938 | 632.67  | 73 | 3 | SDIAEMLELSR                  | 12d | 28 |
| FBgn0002938 | 1226.55 | 59 | 2 | TALDNLLTKPDGLFYIIDDASR       | 12d | 28 |
| FBgn0002938 | 504.3   | 60 | 1 | TLYKEPELFVDR                 | 12d | 28 |
| FBgn0002938 | 698.73  | 84 | 1 | YAEVENTDIVSR                 | 12d | 28 |
| FBgn0002938 | 1000.01 | 91 | 2 | YQDDEGYNSSSGNYGVSR           | 12d | 28 |
| FBgn0002938 | 596.28  | 54 | 2 | YYNDEFLAR                    | 12d | 28 |
| FBgn0002938 | 519.17  | 36 | 1 | LPFDEFLR                     | 22d | 28 |
| FBgn0002938 | 847.55  | 98 | 2 | MGESDNIYNQGYFR               | 22d | 28 |
| FBgn0002938 | 772.37  | 37 | 1 | AGNLTMPFEAVQHK               | 32d | 28 |
| FBgn0002938 | 564.94  | 55 | 2 | ALGVLDTVIAR                  | 32d | 28 |
| FBgn0002938 | 735.73  | 37 | 1 | IQHYDEEHQVSIEEYR             | 32d | 28 |
| FBgn0002938 | 518.89  | 40 | 2 | LPFDEFLR                     | 32d | 28 |
| FBgn0002938 | 495.89  | 54 | 2 | LVDFIINR                     | 32d | 28 |
| FBgn0002938 | 848.07  | 89 | 3 | MGESDNIYNQGYFR               | 32d | 28 |
| FBgn0002938 | 805.86  | 41 | 1 | NEGDNSDPPFNFK                | 32d | 28 |
| FBgn0002938 | 698.82  | 75 | 2 | YAEVENTDIVSR                 | 32d | 28 |
| FBgn0002938 | 596.28  | 55 | 3 | YYNDEFLAR                    | 32d | 28 |
| FBgn0002938 | 772.33  | 52 | 2 | AGNLTMPFEAVQHK               | 36d | 28 |
| FBgn0002938 | 564.95  | 66 | 2 | ALGVLDTVIAR                  | 36d | 28 |
| FBgn0002938 | 816.13  | 41 | 1 | EPQHIVLSGESYSYGK             | 36d | 28 |
| FBgn0002938 | 519.48  | 35 | 2 | LPFDEFLR                     | 36d | 28 |
| FBgn0002938 | 495.81  | 66 | 3 | LVDFIINR                     | 36d | 28 |
| FBgn0002938 | 847.84  | 77 | 3 | MGESDNIYNQGYFR               | 36d | 28 |
| FBgn0002938 | 1082.29 | 47 | 1 | MYLPYAQLPDPTDKFEIYEEIAQGVNAK | 36d | 28 |
| FBgn0002938 | 1266.53 | 62 | 2 | MYPEDLAALENPVDENIIESLR       | 36d | 28 |
| FBgn0002938 | 698.77  | 80 | 1 | YAEVENTDIVSR                 | 36d | 28 |
| FBgn0002938 | 596.14  | 38 | 2 | YYNDEFLAR                    | 36d | 28 |

|             |         |    |   |                          |     |    |
|-------------|---------|----|---|--------------------------|-----|----|
| FBgn0002938 | 772.31  | 42 | 2 | AGNLTMPFEAVQHK           | 42d | 28 |
| FBgn0002938 | 564.72  | 62 | 3 | ALGVLDTVIAR              | 42d | 28 |
| FBgn0002938 | 816.39  | 34 | 1 | EPQHIVLSGESYS GK         | 42d | 28 |
| FBgn0002938 | 735.78  | 53 | 1 | IQHYDEEHQVSIEEYR         | 42d | 28 |
| FBgn0002938 | 519.48  | 42 | 3 | LPFDEFLR                 | 42d | 28 |
| FBgn0002938 | 495.75  | 52 | 2 | LVDFIINR                 | 42d | 28 |
| FBgn0002938 | 847.86  | 77 | 3 | MGESDNIYNQGYFR           | 42d | 28 |
| FBgn0002938 | 793.92  | 40 | 1 | MLSQANANLGVHFVR          | 42d | 28 |
| FBgn0002938 | 1266.8  | 65 | 2 | MYPEDLAALENPVDENIIESLR   | 42d | 28 |
| FBgn0002938 | 499.48  | 38 | 1 | QYTTEEAR                 | 42d | 28 |
| FBgn0002938 | 699     | 89 | 3 | YAEVENTDIVSR             | 42d | 28 |
| FBgn0002938 | 596.28  | 64 | 2 | YYNDEFLAR                | 42d | 28 |
| FBgn0002938 | 564.79  | 64 | 1 | ALGVLDTVIAR              | 46d | 28 |
| FBgn0002938 | 518.98  | 40 | 2 | LPFDEFLR                 | 46d | 28 |
| FBgn0002938 | 495.61  | 66 | 3 | LVDFIINR                 | 46d | 28 |
| FBgn0002938 | 847.89  | 74 | 2 | MGESDNIYNQGYFR           | 46d | 28 |
| FBgn0002938 | 1266.57 | 91 | 3 | MYPEDLAALENPVDENIIESLR   | 46d | 28 |
| FBgn0002938 | 717.9   | 46 | 1 | SFHSDVVQQQMK             | 46d | 28 |
| FBgn0002938 | 698.74  | 83 | 3 | YAEVENTDIVSR             | 46d | 28 |
| FBgn0002938 | 596.24  | 55 | 3 | YYNDEFLAR                | 46d | 28 |
| FBgn0002938 | 771.94  | 42 | 2 | AGNLTMPFEAVQHK           | 50d | 28 |
| FBgn0002938 | 564.74  | 66 | 4 | ALGVLDTVIAR              | 50d | 28 |
| FBgn0002938 | 519.22  | 46 | 1 | LPFDEFLR                 | 50d | 28 |
| FBgn0002938 | 495.79  | 44 | 1 | LVDFIINR                 | 50d | 28 |
| FBgn0002938 | 847.67  | 64 | 1 | MGESDNIYNQGYFR           | 50d | 28 |
| FBgn0002938 | 1266.74 | 54 | 2 | MYPEDLAALENPVDENIIESLR   | 50d | 28 |
| FBgn0002938 | 698.8   | 91 | 2 | YAEVENTDIVSR             | 50d | 28 |
| FBgn0002938 | 596.29  | 46 | 3 | YYNDEFLAR                | 50d | 28 |
| FBgn0002938 | 772.41  | 42 | 1 | AGNLTMPFEAVQHK           | 52d | 28 |
| FBgn0002938 | 816.22  | 42 | 1 | EPQHIVLSGESYS GK         | 52d | 28 |
| FBgn0002938 | 1435.65 | 38 | 1 | EYDEEHIDISETPSEAEEMFLEAR | 52d | 28 |
| FBgn0002938 | 519.5   | 42 | 3 | LPFDEFLR                 | 52d | 28 |

|             |         |    |   |                           |      |    |
|-------------|---------|----|---|---------------------------|------|----|
| FBgn0002938 | 495.66  | 51 | 2 | LVDFIINR                  | 52d  | 28 |
| FBgn0002938 | 847.96  | 47 | 1 | MGESDNIYNQGYFR            | 52d  | 28 |
| FBgn0002938 | 596.46  | 56 | 2 | YYNDEFLLAR                | 52d  | 28 |
| FBgn0002938 | 741.42  | 54 | 1 | DFVPPMIETFR               | 56d  | 28 |
| FBgn0002938 | 735.75  | 38 | 1 | IQHYDEEHQVSIEEYR          | 56d  | 28 |
| FBgn0002938 | 519.25  | 54 | 3 | LPFDEFLLR                 | 56d  | 28 |
| FBgn0002938 | 1266.57 | 69 | 2 | MYPEDLAALNPVDENIIESLR     | 56d  | 28 |
| FBgn0002938 | 632.74  | 75 | 2 | SDIAEMLELSR               | 56d  | 28 |
| FBgn0002938 | 1226.54 | 45 | 2 | TALDNLLTKPDGLFYIIDDASR    | 56d  | 28 |
| FBgn0002938 | 991.19  | 79 | 2 | YQFLAFDFDEPVMETK          | 56d  | 28 |
| FBgn0002940 | 799.28  | 79 | 1 | SSDAQSQATASEAESK          | 2d   | 18 |
| FBgn0002940 | 993.98  | 63 | 1 | YVPEGNLTSCGIDYLER         | 2d   | 18 |
| FBgn0002940 | 993.87  | 66 | 1 | YVPEGNLTSCGIDYLER         | 22d  | 18 |
| FBgn0002940 | 834.62  | 76 | 2 | SSDAQSQATASEAESKA         | 42d  | 18 |
| FBgn0002940 | 993.88  | 62 | 2 | YVPEGNLTSCGIDYLER         | 42d  | 18 |
| FBgn0002940 | 994.19  | 41 | 1 | YVPEGNLTSCGIDYLER         | 102d | 18 |
| FBgn0002940 | 834.58  | 86 | 3 | SSDAQSQATASEAESKA         | 2d   | 28 |
| FBgn0002940 | 994.08  | 75 | 3 | YVPEGNLTSCGIDYLER         | 2d   | 28 |
| FBgn0002940 | 994.05  | 48 | 1 | YVPEGNLTSCGIDYLER         | 12d  | 28 |
| FBgn0002940 | 993.87  | 39 | 1 | YVPEGNLTSCGIDYLER         | 36d  | 28 |
| FBgn0002940 | 993.96  | 52 | 2 | YVPEGNLTSCGIDYLER         | 46d  | 28 |
| FBgn0002940 | 994.21  | 81 | 2 | YVPEGNLTSCGIDYLER         | 52d  | 28 |
| FBgn0002968 | 1308.07 | 57 | 2 | DAVNVAPATPSFSWEQLPSDNGLAK | 2d   | 18 |
| FBgn0002968 | 1307.92 | 49 | 2 | DAVNVAPATPSFSWEQLPSDNGLAK | 2d   | 28 |
| FBgn0002968 | 1308.25 | 52 | 1 | DAVNVAPATPSFSWEQLPSDNGLAK | 12d  | 28 |
| FBgn0002968 | 1308.2  | 38 | 1 | DAVNVAPATPSFSWEQLPSDNGLAK | 52d  | 28 |
| FBgn0003034 | 521.18  | 40 | 1 | LNLGPAWGGR                | 82d  | 18 |
| FBgn0003062 | 386.77  | 37 | 1 | DLINVAK                   | 42d  | 28 |
| FBgn0003071 | 701.55  | 37 | 1 | LNIVIVAEGAMDR             | 2d   | 18 |
| FBgn0003071 | 602.92  | 42 | 1 | CVDWLAAQIK                | 42d  | 18 |
| FBgn0003071 | 835.58  | 55 | 2 | DSVPVVISLDGNQAVR          | 42d  | 18 |
| FBgn0003071 | 724.6   | 56 | 1 | QEWSSLLDELVK              | 42d  | 18 |

|             |        |    |   |                   |      |    |
|-------------|--------|----|---|-------------------|------|----|
| FBgn0003071 | 835.52 | 46 | 1 | DSVPVVISLDGNQAVR  | 102d | 18 |
| FBgn0003071 | 724.57 | 52 | 1 | QEWSSLLDELVK      | 112d | 18 |
| FBgn0003071 | 835.31 | 51 | 1 | DSVPVVISLDGNQAVR  | 122d | 18 |
| FBgn0003071 | 734    | 46 | 2 | ASENYSTDFIYR      | 132d | 18 |
| FBgn0003071 | 724.37 | 40 | 1 | QEWSSLLDELVK      | 132d | 18 |
| FBgn0003071 | 733.77 | 74 | 1 | ASENYSTDFIYR      | 142d | 18 |
| FBgn0003071 | 724.46 | 50 | 1 | QEWSSLLDELVK      | 142d | 18 |
| FBgn0003071 | 733.63 | 42 | 1 | ASENYSTDFIYR      | 2d   | 28 |
| FBgn0003071 | 701.22 | 35 | 1 | LNIVIVAEGAMDR     | 2d   | 28 |
| FBgn0003071 | 701.45 | 36 | 1 | LNIVIVAEGAMDR     | 42d  | 28 |
| FBgn0003071 | 701.27 | 35 | 1 | LNIVIVAEGAMDR     | 52d  | 28 |
| FBgn0003071 | 933.69 | 67 | 1 | FSPLVDLIAETNFDQR  | 56d  | 28 |
| FBgn0003071 | 724.45 | 53 | 2 | QEWSSLLDELVK      | 56d  | 28 |
| FBgn0003074 | 867.57 | 80 | 3 | DAMFSGQHINITENR   | 2d   | 18 |
| FBgn0003074 | 936.48 | 41 | 1 | GTDPVLVDDKDVMVDVR | 2d   | 18 |
| FBgn0003074 | 911.14 | 42 | 1 | ILLSNFLAQTEALMAGK | 2d   | 18 |
| FBgn0003074 | 822.64 | 57 | 1 | INDEVWDLTLLAK     | 2d   | 18 |
| FBgn0003074 | 874.08 | 34 | 1 | LHTQNDGEILLDYSK   | 2d   | 18 |
| FBgn0003074 | 807.89 | 53 | 1 | TFTTQETITNATSAK   | 2d   | 18 |
| FBgn0003074 | 807.88 | 66 | 1 | TFTTQETITNATSAK   | 22d  | 18 |
| FBgn0003074 | 720.3  | 45 | 1 | EFTNMVISGVWR      | 42d  | 18 |
| FBgn0003074 | 607.46 | 60 | 1 | ILLSNFLAQTEALMAGK | 42d  | 18 |
| FBgn0003074 | 822.3  | 89 | 4 | INDEVWDLTLLAK     | 42d  | 18 |
| FBgn0003074 | 873.93 | 58 | 1 | LHTQNDGEILLDYSK   | 42d  | 18 |
| FBgn0003074 | 910.81 | 38 | 1 | ILLSNFLAQTEALMAGK | 62d  | 18 |
| FBgn0003074 | 822.31 | 39 | 1 | INDEVWDLTLLAK     | 62d  | 18 |
| FBgn0003074 | 873.72 | 72 | 1 | LHTQNDGEILLDYSK   | 62d  | 18 |
| FBgn0003074 | 765.93 | 38 | 1 | VFVGNRPTNSIVVK    | 62d  | 18 |
| FBgn0003074 | 822.62 | 87 | 1 | INDEVWDLTLLAK     | 82d  | 18 |
| FBgn0003074 | 911.13 | 71 | 2 | ILLSNFLAQTEALMAGK | 102d | 18 |
| FBgn0003074 | 822.39 | 77 | 1 | INDEVWDLTLLAK     | 102d | 18 |
| FBgn0003074 | 720.49 | 55 | 2 | EFTNMVISGVWR      | 112d | 18 |

|             |         |     |   |                       |      |    |
|-------------|---------|-----|---|-----------------------|------|----|
| FBgn0003074 | 910.9   | 90  | 3 | ILLSNFLAQTEALMAGK     | 112d | 18 |
| FBgn0003074 | 822.15  | 53  | 1 | INDEVWDLTLLTLAK       | 112d | 18 |
| FBgn0003074 | 720.3   | 40  | 1 | EFTNMVISGVWR          | 122d | 18 |
| FBgn0003074 | 910.69  | 79  | 1 | ILLSNFLAQTEALMAGK     | 122d | 18 |
| FBgn0003074 | 822.17  | 73  | 1 | INDEVWDLTLLTLAK       | 122d | 18 |
| FBgn0003074 | 765.97  | 40  | 1 | VFVGNRPTNSIVVK        | 122d | 18 |
| FBgn0003074 | 720.52  | 64  | 1 | EFTNMVISGVWR          | 142d | 18 |
| FBgn0003074 | 936.51  | 81  | 2 | GTDPVLVDDKDVMPDVR     | 142d | 18 |
| FBgn0003074 | 910.85  | 68  | 2 | ILLSNFLAQTEALMAGK     | 142d | 18 |
| FBgn0003074 | 867.15  | 90  | 2 | DAMFSGQHINITENR       | 2d   | 28 |
| FBgn0003074 | 910.88  | 72  | 2 | ILLSNFLAQTEALMAGK     | 2d   | 28 |
| FBgn0003074 | 822.28  | 42  | 1 | INDEVWDLTLLTLAK       | 2d   | 28 |
| FBgn0003074 | 873.85  | 66  | 2 | LHTQNDGEILLDYSK       | 2d   | 28 |
| FBgn0003074 | 807.86  | 58  | 1 | TFTTQETITNATSAK       | 2d   | 28 |
| FBgn0003074 | 867.33  | 61  | 2 | DAMFSGQHINITENR       | 12d  | 28 |
| FBgn0003074 | 720.34  | 47  | 1 | EFTNMVISGVWR          | 12d  | 28 |
| FBgn0003074 | 548.67  | 66  | 3 | INDEVWDLTLLTLAK       | 12d  | 28 |
| FBgn0003074 | 873.81  | 73  | 3 | LHTQNDGEILLDYSK       | 32d  | 28 |
| FBgn0003074 | 867.28  | 120 | 2 | DAMFSGQHINITENR       | 36d  | 28 |
| FBgn0003074 | 911.11  | 85  | 3 | ILLSNFLAQTEALMAGK     | 36d  | 28 |
| FBgn0003074 | 873.93  | 38  | 1 | LHTQNDGEILLDYSK       | 36d  | 28 |
| FBgn0003074 | 873.95  | 51  | 3 | LHTQNDGEILLDYSK       | 42d  | 28 |
| FBgn0003074 | 911.14  | 80  | 1 | ILLSNFLAQTEALMAGK     | 46d  | 28 |
| FBgn0003074 | 873.9   | 82  | 3 | LHTQNDGEILLDYSK       | 46d  | 28 |
| FBgn0003074 | 867.6   | 93  | 2 | DAMFSGQHINITENR       | 50d  | 28 |
| FBgn0003074 | 910.9   | 90  | 1 | ILLSNFLAQTEALMAGK     | 50d  | 28 |
| FBgn0003074 | 807.89  | 61  | 1 | TFTTQETITNATSAK       | 50d  | 28 |
| FBgn0003074 | 607.63  | 63  | 1 | ILLSNFLAQTEALMAGK     | 56d  | 28 |
| FBgn0003074 | 822.64  | 67  | 1 | INDEVWDLTLLTLAK       | 56d  | 28 |
| FBgn0003075 | 1153    | 60  | 1 | LIVWNGPPGVFEFPNFANGTK | 2d   | 18 |
| FBgn0003075 | 545.87  | 41  | 2 | LGDVYVNDAFGTAHR       | 42d  | 18 |
| FBgn0003075 | 1153.29 | 57  | 1 | LIVWNGPPGVFEFPNFANGTK | 42d  | 18 |

|             |         |    |   |                         |      |    |
|-------------|---------|----|---|-------------------------|------|----|
| FBgn0003075 | 1228.43 | 65 | 2 | WNTEALVSHVSTGGGASLELLEK | 42d  | 18 |
| FBgn0003075 | 749.61  | 48 | 3 | YFSQALDKPPNPFLAILGGAK   | 42d  | 18 |
| FBgn0003075 | 620.2   | 48 | 1 | IGGSLFDEEGSK            | 62d  | 18 |
| FBgn0003075 | 818.03  | 51 | 2 | LGDVYVNDAFGTAHR         | 62d  | 18 |
| FBgn0003075 | 1124.8  | 38 | 1 | YFSQALDKPPNPFLAILGGAK   | 62d  | 18 |
| FBgn0003075 | 620.41  | 50 | 1 | IGGSLFDEEGSK            | 82d  | 18 |
| FBgn0003075 | 1152.99 | 48 | 1 | LIVWNGPPGVFEFPNFANGTK   | 102d | 18 |
| FBgn0003075 | 818.54  | 51 | 2 | LGDVYVNDAFGTAHR         | 112d | 18 |
| FBgn0003075 | 1153.1  | 69 | 3 | LIVWNGPPGVFEFPNFANGTK   | 112d | 18 |
| FBgn0003075 | 1124.7  | 38 | 2 | YFSQALDKPPNPFLAILGGAK   | 112d | 18 |
| FBgn0003075 | 818.32  | 49 | 3 | LGDVYVNDAFGTAHR         | 122d | 18 |
| FBgn0003075 | 1153.34 | 61 | 1 | LIVWNGPPGVFEFPNFANGTK   | 122d | 18 |
| FBgn0003075 | 1124.68 | 47 | 2 | YFSQALDKPPNPFLAILGGAK   | 122d | 18 |
| FBgn0003075 | 588.89  | 37 | 2 | YTLAPVAAELK             | 122d | 18 |
| FBgn0003075 | 818.55  | 65 | 1 | LGDVYVNDAFGTAHR         | 132d | 18 |
| FBgn0003075 | 750.05  | 57 | 2 | YFSQALDKPPNPFLAILGGAK   | 132d | 18 |
| FBgn0003075 | 818.2   | 39 | 1 | LGDVYVNDAFGTAHR         | 142d | 18 |
| FBgn0003075 | 750.22  | 63 | 2 | YFSQALDKPPNPFLAILGGAK   | 142d | 18 |
| FBgn0003075 | 588.78  | 49 | 1 | YTLAPVAAELK             | 142d | 18 |
| FBgn0003075 | 1152.81 | 63 | 3 | LIVWNGPPGVFEFPNFANGTK   | 2d   | 28 |
| FBgn0003075 | 750.07  | 57 | 2 | YFSQALDKPPNPFLAILGGAK   | 2d   | 28 |
| FBgn0003075 | 545.6   | 42 | 1 | LGDVYVNDAFGTAHR         | 12d  | 28 |
| FBgn0003075 | 1153.27 | 70 | 2 | LIVWNGPPGVFEFPNFANGTK   | 12d  | 28 |
| FBgn0003075 | 817.84  | 35 | 2 | LGDVYVNDAFGTAHR         | 22d  | 28 |
| FBgn0003075 | 817.77  | 45 | 2 | LGDVYVNDAFGTAHR         | 32d  | 28 |
| FBgn0003075 | 620.48  | 60 | 1 | IGGSLFDEEGSK            | 36d  | 28 |
| FBgn0003075 | 1153.03 | 38 | 2 | LIVWNGPPGVFEFPNFANGTK   | 36d  | 28 |
| FBgn0003075 | 545.42  | 48 | 1 | LGDVYVNDAFGTAHR         | 46d  | 28 |
| FBgn0003075 | 1153.18 | 63 | 1 | LIVWNGPPGVFEFPNFANGTK   | 46d  | 28 |
| FBgn0003075 | 545.71  | 35 | 1 | LGDVYVNDAFGTAHR         | 50d  | 28 |
| FBgn0003075 | 750.2   | 66 | 1 | YFSQALDKPPNPFLAILGGAK   | 50d  | 28 |
| FBgn0003075 | 817.94  | 37 | 1 | LGDVYVNDAFGTAHR         | 56d  | 28 |

|             |         |     |   |                            |      |    |
|-------------|---------|-----|---|----------------------------|------|----|
| FBgn0003075 | 1124.77 | 49  | 3 | YFSQALDKPPNPFLAILGGAK      | 56d  | 28 |
| FBgn0003076 | 940.55  | 34  | 1 | ENVLGQASVMLKPLIDIALEISQLPK | 2d   | 18 |
| FBgn0003076 | 796.18  | 34  | 1 | DLVDTVAQGDYDIGAAFDGDGDR    | 42d  | 18 |
| FBgn0003076 | 1193.59 | 81  | 1 | DLVDTVAQGDYDIGAAFDGDGDR    | 82d  | 18 |
| FBgn0003076 | 1193.59 | 71  | 1 | DLVDTVAQGDYDIGAAFDGDGDR    | 12d  | 28 |
| FBgn0003076 | 1193.61 | 91  | 1 | DLVDTVAQGDYDIGAAFDGDGDR    | 52d  | 28 |
| FBgn0003076 | 1193.65 | 65  | 2 | DLVDTVAQGDYDIGAAFDGDGDR    | 56d  | 28 |
| FBgn0003137 | 1078.76 | 70  | 1 | DLAPGYNDLLLLPEGATNIR       | 2d   | 18 |
| FBgn0003137 | 1078.66 | 40  | 1 | DLAPGYNDLLLLPEGATNIR       | 102d | 18 |
| FBgn0003137 | 1078.72 | 43  | 1 | DLAPGYNDLLLLPEGATNIR       | 2d   | 28 |
| FBgn0003149 | 646.04  | 78  | 3 | ADTAESSLNIIR               | 2d   | 18 |
| FBgn0003149 | 1248.83 | 67  | 1 | ATSTGPGTADVNIIEYIQDLSSLSR  | 2d   | 18 |
| FBgn0003149 | 698.18  | 52  | 1 | FQTEVYELLSQIESYNK          | 2d   | 18 |
| FBgn0003149 | 802.21  | 64  | 1 | INELTTANVSLVSIK            | 2d   | 18 |
| FBgn0003149 | 827.67  | 85  | 2 | ITELEEHIESLIVK             | 2d   | 18 |
| FBgn0003149 | 798.03  | 63  | 1 | KEEEDYIAQTLVR              | 2d   | 18 |
| FBgn0003149 | 549.91  | 72  | 2 | LAADFNQYR                  | 2d   | 18 |
| FBgn0003149 | 708.8   | 61  | 1 | LAEKDEEIEAIR               | 2d   | 18 |
| FBgn0003149 | 651.09  | 43  | 2 | LAGLNGELEEV                | 2d   | 18 |
| FBgn0003149 | 786.4   | 63  | 3 | LASEVEVLIIDLEK             | 2d   | 18 |
| FBgn0003149 | 894.13  | 88  | 1 | LEEAEGGAEHQFEANR           | 2d   | 18 |
| FBgn0003149 | 991.99  | 34  | 1 | LLEDVHLESEETLLLK           | 2d   | 18 |
| FBgn0003149 | 615.8   | 45  | 1 | LLQDDLEVER                 | 2d   | 18 |
| FBgn0003149 | 629.05  | 57  | 1 | NLILLQDALDK                | 2d   | 18 |
| FBgn0003149 | 846.84  | 88  | 3 | QLSEQEGVSQQTTTR            | 2d   | 18 |
| FBgn0003149 | 1029.9  | 50  | 2 | QSLQLTELQAHYEDVQR          | 2d   | 18 |
| FBgn0003149 | 701.99  | 74  | 3 | QTSIEIEQLNAR               | 2d   | 18 |
| FBgn0003149 | 1071.14 | 76  | 3 | SKLEQELSVVASDYEEVSK        | 2d   | 18 |
| FBgn0003149 | 685.76  | 86  | 4 | SLLESSLHQVEIELDSVR         | 2d   | 18 |
| FBgn0003149 | 1108.6  | 57  | 2 | TFVTTSTVPGSQVYIQETTR       | 2d   | 18 |
| FBgn0003149 | 698.97  | 85  | 3 | TVELQYEEAASR               | 2d   | 18 |
| FBgn0003149 | 1248.72 | 106 | 3 | ATSTGPGTADVNIIEYIQDLSSLSR  | 22d  | 18 |

|             |         |     |   |                          |     |    |
|-------------|---------|-----|---|--------------------------|-----|----|
| FBgn0003149 | 1029.53 | 77  | 2 | HNEIITDFQEQVEILTK        | 22d | 18 |
| FBgn0003149 | 827.7   | 66  | 2 | ITELEEHIESLIVK           | 22d | 18 |
| FBgn0003149 | 549.72  | 58  | 3 | LAADFNQYR                | 22d | 18 |
| FBgn0003149 | 708.6   | 78  | 2 | LAEKDEEIEAIR             | 22d | 18 |
| FBgn0003149 | 651.09  | 70  | 1 | LAGLNGELEEVK             | 22d | 18 |
| FBgn0003149 | 628.57  | 56  | 3 | NLILLQDALDK              | 22d | 18 |
| FBgn0003149 | 753.46  | 64  | 1 | SASAIQALLSESEK           | 22d | 18 |
| FBgn0003149 | 1071.26 | 98  | 5 | SKLEQELSVVASDYEEVSK      | 22d | 18 |
| FBgn0003149 | 1028.25 | 47  | 3 | SLLESSLHQVEIELDSVR       | 22d | 18 |
| FBgn0003149 | 623.72  | 61  | 1 | SQVISQLEDAR              | 22d | 18 |
| FBgn0003149 | 698.82  | 85  | 2 | TVELQYEEAASR             | 22d | 18 |
| FBgn0003149 | 1046.69 | 81  | 4 | FQTEVYELLSQIESYNK        | 42d | 18 |
| FBgn0003149 | 1029.48 | 66  | 3 | HNEIITDFQEQVEILTK        | 42d | 18 |
| FBgn0003149 | 507.28  | 47  | 2 | HVVEQVHEEQER             | 42d | 18 |
| FBgn0003149 | 551.97  | 63  | 3 | ITELEEHIESLIVK           | 42d | 18 |
| FBgn0003149 | 708.96  | 53  | 1 | LAEKDEEIEAIR             | 42d | 18 |
| FBgn0003149 | 786.47  | 97  | 2 | LASEVEVLIIDLEK           | 42d | 18 |
| FBgn0003149 | 628.9   | 54  | 3 | NLILLQDALDK              | 42d | 18 |
| FBgn0003149 | 570.37  | 36  | 1 | RLENERDELTAAYK           | 42d | 18 |
| FBgn0003149 | 1070.88 | 113 | 2 | SKLEQELSVVASDYEEVSK      | 42d | 18 |
| FBgn0003149 | 1028.01 | 88  | 5 | SLLESSLHQVEIELDSVR       | 42d | 18 |
| FBgn0003149 | 1248.82 | 93  | 2 | ATSTGPGTADVNIIEYIQLSSLSR | 62d | 18 |
| FBgn0003149 | 801.66  | 83  | 2 | INELTTANVSLVSIK          | 62d | 18 |
| FBgn0003149 | 826.71  | 69  | 2 | ITELEEHIESLIVK           | 62d | 18 |
| FBgn0003149 | 549.74  | 59  | 2 | LAADFNQYR                | 62d | 18 |
| FBgn0003149 | 708.79  | 73  | 2 | LAEKDEEIEAIR             | 62d | 18 |
| FBgn0003149 | 894.48  | 92  | 2 | LEEAEAGAEHQFEANR         | 62d | 18 |
| FBgn0003149 | 628.71  | 57  | 1 | NLILLQDALDK              | 62d | 18 |
| FBgn0003149 | 1071.24 | 88  | 3 | SKLEQELSVVASDYEEVSK      | 62d | 18 |
| FBgn0003149 | 685.74  | 47  | 1 | SLLESSLHQVEIELDSVR       | 62d | 18 |
| FBgn0003149 | 514.77  | 50  | 1 | TVIDISSHR                | 62d | 18 |
| FBgn0003149 | 1248.78 | 109 | 2 | ATSTGPGTADVNIIEYIQLSSLSR | 82d | 18 |



|             |         |     |   |                           |      |    |
|-------------|---------|-----|---|---------------------------|------|----|
| FBgn0003149 | 802.19  | 35  | 1 | INELTTANVSLVSIK           | 82d  | 18 |
| FBgn0003149 | 827.59  | 80  | 4 | ITELEEHIESLIVK            | 82d  | 18 |
| FBgn0003149 | 708.99  | 61  | 1 | LAEKDEEIEAIR              | 82d  | 18 |
| FBgn0003149 | 650.82  | 67  | 2 | LAGLNGELEEVV              | 82d  | 18 |
| FBgn0003149 | 786.15  | 68  | 1 | LASEVEVLIIDLEK            | 82d  | 18 |
| FBgn0003149 | 628.9   | 51  | 1 | NLILLQDALDK               | 82d  | 18 |
| FBgn0003149 | 1071.27 | 94  | 3 | SKLEQELSVVASDYEEVSK       | 82d  | 18 |
| FBgn0003149 | 1028.28 | 66  | 3 | SLLESSLHQVEIELDSVR        | 82d  | 18 |
| FBgn0003149 | 574.46  | 46  | 2 | TVEFYADSSK                | 82d  | 18 |
| FBgn0003149 | 1248.83 | 96  | 3 | ATSTGPGTADVNIIEYIQDLSSLSR | 102d | 18 |
| FBgn0003149 | 1046.63 | 83  | 1 | FQTEVYELLSQIESYNK         | 102d | 18 |
| FBgn0003149 | 827.64  | 63  | 3 | ITELEEHIESLIVK            | 102d | 18 |
| FBgn0003149 | 846.9   | 70  | 1 | QLSEQEGVSQQTTTR           | 102d | 18 |
| FBgn0003149 | 1030.16 | 48  | 1 | QSLQLTELQAHYEDVQR         | 102d | 18 |
| FBgn0003149 | 1071.09 | 103 | 1 | SKLEQELSVVASDYEEVSK       | 102d | 18 |
| FBgn0003149 | 1028.23 | 101 | 3 | SLLESSLHQVEIELDSVR        | 102d | 18 |
| FBgn0003149 | 1046.49 | 84  | 2 | FQTEVYELLSQIESYNK         | 112d | 18 |
| FBgn0003149 | 827.47  | 69  | 2 | ITELEEHIESLIVK            | 112d | 18 |
| FBgn0003149 | 651.09  | 68  | 1 | LAGLNGELEEVV              | 112d | 18 |
| FBgn0003149 | 894.42  | 73  | 1 | LEEAEGGAEHQFEANR          | 112d | 18 |
| FBgn0003149 | 1028.13 | 49  | 1 | SLLESSLHQVEIELDSVR        | 112d | 18 |
| FBgn0003149 | 1248.23 | 48  | 1 | ATSTGPGTADVNIIEYIQDLSSLSR | 122d | 18 |
| FBgn0003149 | 827.55  | 57  | 2 | ITELEEHIESLIVK            | 122d | 18 |
| FBgn0003149 | 894.37  | 67  | 1 | LEEAEGGAEHQFEANR          | 122d | 18 |
| FBgn0003149 | 687.07  | 37  | 1 | QSLQLTELQAHYEDVQR         | 122d | 18 |
| FBgn0003149 | 1071.04 | 63  | 2 | SKLEQELSVVASDYEEVSK       | 122d | 18 |
| FBgn0003149 | 1028.21 | 70  | 1 | SLLESSLHQVEIELDSVR        | 122d | 18 |
| FBgn0003149 | 646.06  | 73  | 1 | ADTAESLNIIR               | 132d | 18 |
| FBgn0003149 | 1248.86 | 83  | 2 | ATSTGPGTADVNIIEYIQDLSSLSR | 132d | 18 |
| FBgn0003149 | 827.63  | 48  | 1 | ITELEEHIESLIVK            | 132d | 18 |
| FBgn0003149 | 650.76  | 68  | 2 | LAGLNGELEEVV              | 132d | 18 |
| FBgn0003149 | 894.3   | 73  | 2 | LEEAEGGAEHQFEANR          | 132d | 18 |

|             |         |     |   |                           |      |    |
|-------------|---------|-----|---|---------------------------|------|----|
| FBgn0003149 | 846.76  | 57  | 1 | QLSEQEGVSQQTTTR           | 132d | 18 |
| FBgn0003149 | 1030    | 77  | 3 | QSLQLTELQAHYEDVQR         | 132d | 18 |
| FBgn0003149 | 1071.26 | 113 | 3 | SKLEQELSVVASDYEEVSK       | 132d | 18 |
| FBgn0003149 | 1028.16 | 67  | 2 | SLLESSLHQVEIELDSVR        | 132d | 18 |
| FBgn0003149 | 698.98  | 75  | 1 | TVELQYEEAASR              | 132d | 18 |
| FBgn0003149 | 1248.75 | 57  | 1 | ATSTGPGTADVNIIEYIQDLSSLSR | 142d | 18 |
| FBgn0003149 | 1046.73 | 53  | 1 | FQTEVYELLSQIESYNK         | 142d | 18 |
| FBgn0003149 | 827.59  | 68  | 1 | ITELEEHIESLIVK            | 142d | 18 |
| FBgn0003149 | 1029.97 | 85  | 1 | QSLQLTELQAHYEDVQR         | 142d | 18 |
| FBgn0003149 | 1071.05 | 101 | 3 | SKLEQELSVVASDYEEVSK       | 142d | 18 |
| FBgn0003149 | 1028.18 | 83  | 4 | SLLESSLHQVEIELDSVR        | 142d | 18 |
| FBgn0003149 | 698.91  | 66  | 2 | TVELQYEEAASR              | 142d | 18 |
| FBgn0003149 | 645.91  | 77  | 3 | ADTAESSLNIIR              | 2d   | 28 |
| FBgn0003149 | 1248.82 | 69  | 3 | ATSTGPGTADVNIIEYIQDLSSLSR | 2d   | 28 |
| FBgn0003149 | 1046.72 | 109 | 1 | FQTEVYELLSQIESYNK         | 2d   | 28 |
| FBgn0003149 | 801.8   | 84  | 2 | INELTTANVSLVSIK           | 2d   | 28 |
| FBgn0003149 | 552.06  | 40  | 1 | ITELEEHIESLIVK            | 2d   | 28 |
| FBgn0003149 | 797.98  | 62  | 2 | KEEEDYIAQTLVR             | 2d   | 28 |
| FBgn0003149 | 549.66  | 59  | 2 | LAADFNQYR                 | 2d   | 28 |
| FBgn0003149 | 708.75  | 71  | 3 | LAEKDEEIEAIR              | 2d   | 28 |
| FBgn0003149 | 650.97  | 59  | 1 | LAGLNGELEEV               | 2d   | 28 |
| FBgn0003149 | 894.15  | 97  | 3 | LEEAEAGGAEHQFEANR         | 2d   | 28 |
| FBgn0003149 | 628.69  | 55  | 3 | NLILLQDALDK               | 2d   | 28 |
| FBgn0003149 | 846.88  | 89  | 3 | QLSEQEGVSQQTTTR           | 2d   | 28 |
| FBgn0003149 | 1071.05 | 90  | 3 | SKLEQELSVVASDYEEVSK       | 2d   | 28 |
| FBgn0003149 | 1028.1  | 89  | 1 | SLLESSLHQVEIELDSVR        | 2d   | 28 |
| FBgn0003149 | 623.73  | 75  | 3 | SQVISQLEDAR               | 2d   | 28 |
| FBgn0003149 | 1108.35 | 39  | 1 | TFVTTSTVPGSQVYIQETTR      | 2d   | 28 |
| FBgn0003149 | 698.6   | 78  | 2 | TVELQYEEAASR              | 2d   | 28 |
| FBgn0003149 | 645.99  | 78  | 2 | ADTAESSLNIIR              | 12d  | 28 |
| FBgn0003149 | 1248.57 | 83  | 1 | ATSTGPGTADVNIIEYIQDLSSLSR | 12d  | 28 |
| FBgn0003149 | 1046.6  | 79  | 1 | FQTEVYELLSQIESYNK         | 12d  | 28 |

|             |         |     |   |                           |     |    |
|-------------|---------|-----|---|---------------------------|-----|----|
| FBgn0003149 | 801.85  | 49  | 1 | INELTTANVSLVSIK           | 12d | 28 |
| FBgn0003149 | 827.34  | 80  | 1 | ITELEEHIESLIVK            | 12d | 28 |
| FBgn0003149 | 549.75  | 59  | 3 | LAADFNQYR                 | 12d | 28 |
| FBgn0003149 | 708.8   | 68  | 2 | LAEKDEEIEAIR              | 12d | 28 |
| FBgn0003149 | 650.99  | 77  | 3 | LAGLNGELEEV               | 12d | 28 |
| FBgn0003149 | 786.58  | 68  | 1 | LASEVEVLIIDLEK            | 12d | 28 |
| FBgn0003149 | 894.27  | 76  | 3 | LEEAEGGAEHQFEANR          | 12d | 28 |
| FBgn0003149 | 615.72  | 73  | 2 | LLQDDLEVER                | 12d | 28 |
| FBgn0003149 | 628.87  | 56  | 2 | NLILLQDALDK               | 12d | 28 |
| FBgn0003149 | 1071.2  | 73  | 2 | SKLEQELSVVASDYEEVSK       | 12d | 28 |
| FBgn0003149 | 1028.22 | 122 | 5 | SLLESSLHQVEIELDSVR        | 12d | 28 |
| FBgn0003149 | 1108.41 | 37  | 1 | TFVTTSTVPGSQVYIQETTR      | 12d | 28 |
| FBgn0003149 | 698.87  | 76  | 2 | TVELQYEEAASR              | 12d | 28 |
| FBgn0003149 | 1248.66 | 53  | 1 | ATSTGPGTADVNIIEYIQDLSSLSR | 22d | 28 |
| FBgn0003149 | 1029.47 | 86  | 1 | HNEIITDFQEQVEILTK         | 22d | 28 |
| FBgn0003149 | 549.99  | 58  | 1 | LAADFNQYR                 | 22d | 28 |
| FBgn0003149 | 650.81  | 62  | 1 | LAGLNGELEEV               | 22d | 28 |
| FBgn0003149 | 1071.27 | 75  | 5 | SKLEQELSVVASDYEEVSK       | 22d | 28 |
| FBgn0003149 | 1248.67 | 67  | 1 | ATSTGPGTADVNIIEYIQDLSSLSR | 32d | 28 |
| FBgn0003149 | 698.11  | 76  | 3 | FQTEVYELLSQIESYNK         | 32d | 28 |
| FBgn0003149 | 1029.69 | 45  | 1 | HNEIITDFQEQVEILTK         | 32d | 28 |
| FBgn0003149 | 827.56  | 59  | 3 | ITELEEHIESLIVK            | 32d | 28 |
| FBgn0003149 | 549.66  | 58  | 3 | LAADFNQYR                 | 32d | 28 |
| FBgn0003149 | 708.58  | 53  | 1 | LAEKDEEIEAIR              | 32d | 28 |
| FBgn0003149 | 680.52  | 44  | 1 | LEEVELNAVAGSK             | 32d | 28 |
| FBgn0003149 | 628.66  | 43  | 1 | NLILLQDALDK               | 32d | 28 |
| FBgn0003149 | 1071.28 | 92  | 2 | SKLEQELSVVASDYEEVSK       | 32d | 28 |
| FBgn0003149 | 623.82  | 52  | 1 | SQVISQLEDAR               | 32d | 28 |
| FBgn0003149 | 1108.43 | 42  | 1 | TFVTTSTVPGSQVYIQETTR      | 32d | 28 |
| FBgn0003149 | 698.76  | 84  | 2 | TVELQYEEAASR              | 32d | 28 |
| FBgn0003149 | 1248.62 | 73  | 1 | ATSTGPGTADVNIIEYIQDLSSLSR | 36d | 28 |
| FBgn0003149 | 1046.35 | 61  | 2 | FQTEVYELLSQIESYNK         | 36d | 28 |

|             |         |    |   |                           |     |    |
|-------------|---------|----|---|---------------------------|-----|----|
| FBgn0003149 | 1029.65 | 65 | 1 | HNEIITDFQEQVEILTK         | 36d | 28 |
| FBgn0003149 | 801.96  | 43 | 1 | INELTTANVSLVSIK           | 36d | 28 |
| FBgn0003149 | 827.44  | 72 | 2 | ITELEEHIESLIVK            | 36d | 28 |
| FBgn0003149 | 549.58  | 65 | 1 | LAADFNQYR                 | 36d | 28 |
| FBgn0003149 | 628.59  | 60 | 3 | NLILLQDALDK               | 36d | 28 |
| FBgn0003149 | 687.02  | 38 | 1 | QSLQLTELQAHYEDVQR         | 36d | 28 |
| FBgn0003149 | 1070.82 | 72 | 3 | SKLEQELSVVASDYEEVSK       | 36d | 28 |
| FBgn0003149 | 685.75  | 35 | 1 | SLLESSLHQVEIELDSVR        | 36d | 28 |
| FBgn0003149 | 645.76  | 58 | 1 | ADTAESSLNIIR              | 42d | 28 |
| FBgn0003149 | 1248.69 | 88 | 1 | ATSTGPGTADVNIIEYIQDLSSLSR | 42d | 28 |
| FBgn0003149 | 697.79  | 43 | 2 | FQTEVYELLSQIESYNK         | 42d | 28 |
| FBgn0003149 | 827.62  | 66 | 3 | ITELEEHIESLIVK            | 42d | 28 |
| FBgn0003149 | 549.92  | 58 | 3 | LAADFNQYR                 | 42d | 28 |
| FBgn0003149 | 992.14  | 35 | 1 | LLEDVHLESEETLLLK          | 42d | 28 |
| FBgn0003149 | 615.41  | 45 | 1 | LLQDDLEVER                | 42d | 28 |
| FBgn0003149 | 629.07  | 49 | 3 | NLILLQDALDK               | 42d | 28 |
| FBgn0003149 | 1029.96 | 44 | 1 | QSLQLTELQAHYEDVQR         | 42d | 28 |
| FBgn0003149 | 753.27  | 46 | 1 | SASAIAQALLSESEK           | 42d | 28 |
| FBgn0003149 | 1070.99 | 93 | 4 | SKLEQELSVVASDYEEVSK       | 42d | 28 |
| FBgn0003149 | 1027.96 | 96 | 6 | SLLESSLHQVEIELDSVR        | 42d | 28 |
| FBgn0003149 | 698.68  | 72 | 3 | TVELQYEEAASR              | 42d | 28 |
| FBgn0003149 | 409.53  | 45 | 2 | VIEAETR                   | 42d | 28 |
| FBgn0003149 | 1248.85 | 90 | 3 | ATSTGPGTADVNIIEYIQDLSSLSR | 46d | 28 |
| FBgn0003149 | 1046.62 | 56 | 2 | FQTEVYELLSQIESYNK         | 46d | 28 |
| FBgn0003149 | 1029.54 | 75 | 1 | HNEIITDFQEQVEILTK         | 46d | 28 |
| FBgn0003149 | 551.93  | 38 | 1 | ITELEEHIESLIVK            | 46d | 28 |
| FBgn0003149 | 708.64  | 57 | 1 | LAEKDEEIEAIR              | 46d | 28 |
| FBgn0003149 | 1071.09 | 71 | 1 | SKLEQELSVVASDYEEVSK       | 46d | 28 |
| FBgn0003149 | 685.48  | 49 | 2 | SLLESSLHQVEIELDSVR        | 46d | 28 |
| FBgn0003149 | 698.5   | 41 | 1 | TVELQYEEAASR              | 46d | 28 |
| FBgn0003149 | 645.66  | 60 | 1 | ADTAESSLNIIR              | 50d | 28 |
| FBgn0003149 | 1248.68 | 96 | 3 | ATSTGPGTADVNIIEYIQDLSSLSR | 50d | 28 |

|             |         |    |   |                            |     |    |
|-------------|---------|----|---|----------------------------|-----|----|
| FBgn0003149 | 1046.66 | 62 | 3 | FQTEVYELLSQIESYNK          | 50d | 28 |
| FBgn0003149 | 826.73  | 70 | 2 | ITELEEHIESLIVK             | 50d | 28 |
| FBgn0003149 | 549.78  | 58 | 1 | LAADFNQYR                  | 50d | 28 |
| FBgn0003149 | 708.9   | 61 | 1 | LAEKDEEIEAIR               | 50d | 28 |
| FBgn0003149 | 776.87  | 64 | 1 | LENERDELTAAYK              | 50d | 28 |
| FBgn0003149 | 628.51  | 48 | 2 | NLILLQDALDK                | 50d | 28 |
| FBgn0003149 | 1071.18 | 94 | 4 | SKLEQELSVVASDYEEVSK        | 50d | 28 |
| FBgn0003149 | 1028.13 | 72 | 2 | SLLESSLHQVEIELDSVR         | 50d | 28 |
| FBgn0003149 | 646.08  | 54 | 1 | ADTAESLNIR                 | 52d | 28 |
| FBgn0003149 | 1248.43 | 71 | 1 | ATSTGPGTADVNIYIQDLSSLSR    | 52d | 28 |
| FBgn0003149 | 1046.43 | 73 | 1 | FQTEVYELLSQIESYNK          | 52d | 28 |
| FBgn0003149 | 1029.75 | 79 | 2 | HNEIITDFQEVEILTK           | 52d | 28 |
| FBgn0003149 | 827.7   | 80 | 3 | ITELEEHIESLIVK             | 52d | 28 |
| FBgn0003149 | 894.26  | 79 | 2 | LEEAEGGAEHQFEANR           | 52d | 28 |
| FBgn0003149 | 628.88  | 61 | 3 | NLILLQDALDK                | 52d | 28 |
| FBgn0003149 | 1029.86 | 56 | 3 | QSLQLTELQAHYEDVQR          | 52d | 28 |
| FBgn0003149 | 1071    | 95 | 2 | SKLEQELSVVASDYEEVSK        | 52d | 28 |
| FBgn0003149 | 1028.04 | 80 | 5 | SLLESSLHQVEIELDSVR         | 52d | 28 |
| FBgn0003149 | 698.92  | 74 | 1 | TVELQYEEAASR               | 52d | 28 |
| FBgn0003149 | 1046.69 | 82 | 4 | FQTEVYELLSQIESYNK          | 56d | 28 |
| FBgn0003149 | 827.45  | 64 | 1 | ITELEEHIESLIVK             | 56d | 28 |
| FBgn0003149 | 650.91  | 70 | 1 | LAGLNGELEEV                | 56d | 28 |
| FBgn0003149 | 628.74  | 55 | 3 | NLILLQDALDK                | 56d | 28 |
| FBgn0003149 | 753.61  | 77 | 1 | SASAIAQALLSESEK            | 56d | 28 |
| FBgn0003149 | 1027.79 | 64 | 2 | SLLESSLHQVEIELDSVR         | 56d | 28 |
| FBgn0003151 | 1031.75 | 44 | 1 | IIPIDDHLGISIAGLTADAR       | 2d  | 18 |
| FBgn0003151 | 677.93  | 43 | 1 | DPEVLVATEQRP               | 2d  | 28 |
| FBgn0003151 | 1031.69 | 36 | 1 | IIPIDDHLGISIAGLTADAR       | 2d  | 28 |
| FBgn0003162 | 1462.83 | 53 | 1 | GYDQSLEDVLNGAVFDEDHDEMVVVK | 2d  | 18 |
| FBgn0003162 | 627.95  | 59 | 3 | LLLGGLGENPDR               | 2d  | 18 |
| FBgn0003162 | 975.34  | 66 | 1 | GYDQSLEDVLNGAVFDEDHDEMVVVK | 2d  | 28 |
| FBgn0003162 | 627.72  | 62 | 3 | LLLGGLGENPDR               | 2d  | 28 |

|             |         |     |   |                          |     |    |
|-------------|---------|-----|---|--------------------------|-----|----|
| FBgn0003162 | 607.01  | 81  | 1 | TVTSTMLGVFR              | 2d  | 28 |
| FBgn0003178 | 949.22  | 115 | 5 | GAGTIDASHAAAIAAVEAATK    | 2d  | 18 |
| FBgn0003178 | 1239.55 | 114 | 5 | GSLEIVYVDYENIVNVVKPGNR   | 2d  | 18 |
| FBgn0003178 | 1327.65 | 66  | 2 | IENQQGMHNLDEIIEAGDGIMVAR | 2d  | 18 |
| FBgn0003178 | 910.52  | 64  | 3 | KGVNLPGVVDLPAVSEK        | 2d  | 18 |
| FBgn0003178 | 509.91  | 36  | 1 | LGYEHPVAIALDTK           | 2d  | 18 |
| FBgn0003178 | 624.95  | 37  | 1 | TGDSVVVVTGWK             | 2d  | 18 |
| FBgn0003178 | 724.17  | 70  | 1 | VFVDDGLISLIVR            | 2d  | 18 |
| FBgn0003178 | 633.16  | 89  | 4 | GAGTIDASHAAAIAAVEAATK    | 22d | 18 |
| FBgn0003178 | 571.53  | 51  | 2 | GDLGIEIPA EK             | 22d | 18 |
| FBgn0003178 | 846.6   | 53  | 2 | GVNLPGVVDLPAVSEK         | 22d | 18 |
| FBgn0003178 | 509.88  | 55  | 2 | LGYEHPVAIALDTK           | 22d | 18 |
| FBgn0003178 | 432.64  | 47  | 1 | LQFDSPVPHVR              | 22d | 18 |
| FBgn0003178 | 624.63  | 60  | 2 | TGDSVVVVTGWK             | 22d | 18 |
| FBgn0003178 | 508.2   | 35  | 1 | EPGLGDWLK                | 42d | 18 |
| FBgn0003178 | 949.09  | 105 | 2 | GAGTIDASHAAAIAAVEAATK    | 42d | 18 |
| FBgn0003178 | 846.72  | 52  | 2 | GVNLPGVVDLPAVSEK         | 42d | 18 |
| FBgn0003178 | 910.36  | 56  | 3 | KGVNLPGVVDLPAVSEK        | 42d | 18 |
| FBgn0003178 | 764.58  | 50  | 2 | LGYEHPVAIALDTK           | 42d | 18 |
| FBgn0003178 | 724.04  | 99  | 4 | VFVDDGLISLIVR            | 42d | 18 |
| FBgn0003178 | 488.72  | 39  | 1 | VQFGLQVGK                | 42d | 18 |
| FBgn0003178 | 508.45  | 39  | 1 | EPGLGDWLK                | 62d | 18 |
| FBgn0003178 | 948.94  | 111 | 4 | GAGTIDASHAAAIAAVEAATK    | 62d | 18 |
| FBgn0003178 | 1239.78 | 54  | 2 | GSLEIVYVDYENIVNVVKPGNR   | 62d | 18 |
| FBgn0003178 | 910.46  | 64  | 1 | KGVNLPGVVDLPAVSEK        | 62d | 18 |
| FBgn0003178 | 764.33  | 63  | 3 | LGYEHPVAIALDTK           | 62d | 18 |
| FBgn0003178 | 648.28  | 48  | 2 | LQFDSPVPHVR              | 62d | 18 |
| FBgn0003178 | 723.83  | 89  | 2 | VFVDDGLISLIVR            | 62d | 18 |
| FBgn0003178 | 488.95  | 44  | 1 | VQFGLQVGK                | 62d | 18 |
| FBgn0003178 | 508.14  | 34  | 1 | EPGLGDWLK                | 82d | 18 |
| FBgn0003178 | 948.89  | 107 | 4 | GAGTIDASHAAAIAAVEAATK    | 82d | 18 |
| FBgn0003178 | 571.65  | 44  | 2 | GDLGIEIPA EK             | 82d | 18 |

|             |         |     |   |                          |      |    |
|-------------|---------|-----|---|--------------------------|------|----|
| FBgn0003178 | 1239.59 | 98  | 2 | GSLEIVYVDYENIVNVVKPGNR   | 82d  | 18 |
| FBgn0003178 | 846.71  | 43  | 2 | GVNLPGV PVDLPAVSEK       | 82d  | 18 |
| FBgn0003178 | 648.59  | 37  | 1 | LQFDSPVPHVR              | 82d  | 18 |
| FBgn0003178 | 480.37  | 60  | 2 | NAAALTEIR                | 82d  | 18 |
| FBgn0003178 | 723.99  | 72  | 2 | VFVDDGLISLIVR            | 82d  | 18 |
| FBgn0003178 | 508.37  | 48  | 1 | EPGLGDWLK                | 102d | 18 |
| FBgn0003178 | 949.2   | 108 | 3 | GAGTIDASHAAAIAAVEAATK    | 102d | 18 |
| FBgn0003178 | 1239.58 | 42  | 1 | GSLEIVYVDYENIVNVVKPGNR   | 102d | 18 |
| FBgn0003178 | 846.2   | 57  | 1 | GVNLPGV PVDLPAVSEK       | 102d | 18 |
| FBgn0003178 | 1327.5  | 70  | 2 | IENQQGMHNLDEIIEAGDGIMVAR | 102d | 18 |
| FBgn0003178 | 910.72  | 48  | 2 | KGVNLPGV PVDLPAVSEK      | 102d | 18 |
| FBgn0003178 | 949.03  | 71  | 3 | GAGTIDASHAAAIAAVEAATK    | 112d | 18 |
| FBgn0003178 | 508.34  | 39  | 1 | EPGLGDWLK                | 122d | 18 |
| FBgn0003178 | 632.29  | 54  | 1 | GAGTIDASHAAAIAAVEAATK    | 122d | 18 |
| FBgn0003178 | 1327.82 | 48  | 1 | IENQQGMHNLDEIIEAGDGIMVAR | 122d | 18 |
| FBgn0003178 | 910.58  | 63  | 3 | KGVNLPGV PVDLPAVSEK      | 122d | 18 |
| FBgn0003178 | 763.17  | 63  | 1 | LGYEHPVAIALDTK           | 122d | 18 |
| FBgn0003178 | 949.04  | 85  | 2 | GAGTIDASHAAAIAAVEAATK    | 132d | 18 |
| FBgn0003178 | 846.54  | 40  | 1 | GVNLPGV PVDLPAVSEK       | 132d | 18 |
| FBgn0003178 | 648.23  | 39  | 1 | LQFDSPVPHVR              | 132d | 18 |
| FBgn0003178 | 948.75  | 72  | 3 | GAGTIDASHAAAIAAVEAATK    | 142d | 18 |
| FBgn0003178 | 910.58  | 37  | 1 | KGVNLPGV PVDLPAVSEK      | 142d | 18 |
| FBgn0003178 | 949.02  | 93  | 3 | GAGTIDASHAAAIAAVEAATK    | 2d   | 28 |
| FBgn0003178 | 571.79  | 44  | 1 | GDLGIEIPA EK             | 2d   | 28 |
| FBgn0003178 | 1327.46 | 57  | 2 | IENQQGMHNLDEIIEAGDGIMVAR | 2d   | 28 |
| FBgn0003178 | 764.28  | 49  | 3 | LGYEHPVAIALDTK           | 2d   | 28 |
| FBgn0003178 | 648.42  | 45  | 1 | LQFDSPVPHVR              | 2d   | 28 |
| FBgn0003178 | 948.66  | 87  | 6 | GAGTIDASHAAAIAAVEAATK    | 12d  | 28 |
| FBgn0003178 | 1239.85 | 80  | 2 | GSLEIVYVDYENIVNVVKPGNR   | 12d  | 28 |
| FBgn0003178 | 1327.57 | 57  | 3 | IENQQGMHNLDEIIEAGDGIMVAR | 12d  | 28 |
| FBgn0003178 | 910.63  | 92  | 2 | KGVNLPGV PVDLPAVSEK      | 12d  | 28 |
| FBgn0003178 | 648.19  | 42  | 1 | LQFDSPVPHVR              | 12d  | 28 |

|             |         |     |   |                           |     |    |
|-------------|---------|-----|---|---------------------------|-----|----|
| FBgn0003178 | 724.05  | 83  | 2 | VFVDDGLISLIVR             | 12d | 28 |
| FBgn0003178 | 949.11  | 113 | 4 | GAGTIDASHAAAIAAVEAATK     | 22d | 28 |
| FBgn0003178 | 910.59  | 66  | 2 | KGVNLPGV PVDLPAVSEK       | 22d | 28 |
| FBgn0003178 | 648.3   | 43  | 3 | LQFDSPVPHVR               | 22d | 28 |
| FBgn0003178 | 949.07  | 100 | 5 | GAGTIDASHAAAIAAVEAATK     | 32d | 28 |
| FBgn0003178 | 826.76  | 57  | 1 | GSLEIVYVDYENIVNVVKPGNR    | 32d | 28 |
| FBgn0003178 | 846.62  | 44  | 1 | GVNLPGV PVDLPAVSEK        | 32d | 28 |
| FBgn0003178 | 910.31  | 56  | 1 | KGVNLPGV PVDLPAVSEK       | 32d | 28 |
| FBgn0003178 | 764.57  | 46  | 3 | LGYEHPVAIALDTK            | 32d | 28 |
| FBgn0003178 | 948.94  | 110 | 5 | GAGTIDASHAAAIAAVEAATK     | 36d | 28 |
| FBgn0003178 | 846.35  | 54  | 1 | GVNLPGV PVDLPAVSEK        | 36d | 28 |
| FBgn0003178 | 764.22  | 60  | 3 | LGYEHPVAIALDTK            | 36d | 28 |
| FBgn0003178 | 948.93  | 119 | 3 | GAGTIDASHAAAIAAVEAATK     | 42d | 28 |
| FBgn0003178 | 910.66  | 58  | 2 | KGVNLPGV PVDLPAVSEK       | 42d | 28 |
| FBgn0003178 | 764.22  | 63  | 3 | LGYEHPVAIALDTK            | 42d | 28 |
| FBgn0003178 | 648.59  | 49  | 1 | LQFDSPVPHVR               | 42d | 28 |
| FBgn0003178 | 624.9   | 62  | 1 | TGDSVVVVTGWK              | 42d | 28 |
| FBgn0003178 | 948.79  | 93  | 3 | GAGTIDASHAAAIAAVEAATK     | 46d | 28 |
| FBgn0003178 | 826.9   | 36  | 1 | GSLEIVYVDYENIVNVVKPGNR    | 46d | 28 |
| FBgn0003178 | 910.22  | 35  | 1 | KGVNLPGV PVDLPAVSEK       | 46d | 28 |
| FBgn0003178 | 764.4   | 46  | 3 | LGYEHPVAIALDTK            | 46d | 28 |
| FBgn0003178 | 624.72  | 36  | 1 | TGDSVVVVTGWK              | 46d | 28 |
| FBgn0003178 | 948.93  | 123 | 2 | GAGTIDASHAAAIAAVEAATK     | 50d | 28 |
| FBgn0003178 | 1327.84 | 61  | 1 | IENQQGMHNLDEIIEAGDGIMVAR  | 50d | 28 |
| FBgn0003178 | 910.57  | 35  | 1 | KGVNLPGV PVDLPAVSEK       | 50d | 28 |
| FBgn0003178 | 764.51  | 48  | 1 | LGYEHPVAIALDTK            | 50d | 28 |
| FBgn0003178 | 1269.06 | 99  | 2 | AEISDVANAVLDGADCVMLSGETAK | 52d | 28 |
| FBgn0003178 | 948.93  | 92  | 3 | GAGTIDASHAAAIAAVEAATK     | 52d | 28 |
| FBgn0003178 | 846.6   | 39  | 1 | GVNLPGV PVDLPAVSEK        | 52d | 28 |
| FBgn0003178 | 1327.51 | 78  | 1 | IENQQGMHNLDEIIEAGDGIMVAR  | 52d | 28 |
| FBgn0003178 | 764.54  | 67  | 3 | LGYEHPVAIALDTK            | 52d | 28 |
| FBgn0003178 | 948.69  | 94  | 3 | GAGTIDASHAAAIAAVEAATK     | 56d | 28 |



|             |         |    |   |                               |      |    |
|-------------|---------|----|---|-------------------------------|------|----|
| FBgn0003178 | 846.59  | 58 | 1 | GVNLPGV PVDLPAVSEK            | 56d  | 28 |
| FBgn0003178 | 764.24  | 51 | 1 | LGYEHPVAIALDTK                | 56d  | 28 |
| FBgn0003204 | 944.96  | 61 | 2 | DPSVMSPTNTVGDVLEAR            | 2d   | 18 |
| FBgn0003204 | 944.96  | 39 | 1 | DPSVMSPTNTVGDVLEAR            | 122d | 18 |
| FBgn0003204 | 945.11  | 48 | 1 | DPSVMSPTNTVGDVLEAR            | 56d  | 28 |
| FBgn0003217 | 871.72  | 70 | 1 | GPGSTDEDLQIGSKPIK             | 2d   | 18 |
| FBgn0003217 | 884.65  | 49 | 1 | LGNYAPIIVPPSWIVK              | 42d  | 18 |
| FBgn0003217 | 884.47  | 57 | 1 | LGNYAPIIVPPSWIVK              | 62d  | 18 |
| FBgn0003217 | 742.12  | 42 | 1 | VKPSVIEIELLNK                 | 62d  | 18 |
| FBgn0003217 | 761.31  | 44 | 1 | ALGWGGGYTDEPIGK               | 112d | 18 |
| FBgn0003217 | 820.03  | 40 | 1 | NANEIATYLESQER                | 112d | 18 |
| FBgn0003217 | 787.37  | 37 | 1 | NNAASGSGGGGAGGGAGGGGGK        | 122d | 18 |
| FBgn0003217 | 761.51  | 53 | 2 | ALGWGGGYTDEPIGK               | 2d   | 28 |
| FBgn0003217 | 826.17  | 49 | 1 | ELGQTALHIAAEQNR               | 2d   | 28 |
| FBgn0003217 | 871.59  | 44 | 1 | GPGSTDEDLQIGSKPIK             | 2d   | 28 |
| FBgn0003217 | 884.25  | 41 | 3 | LGNYAPIIVPPSWIVK              | 2d   | 28 |
| FBgn0003217 | 819.94  | 41 | 1 | NANEIATYLESQER                | 2d   | 28 |
| FBgn0003217 | 533.72  | 38 | 1 | VTPNDDVTDDHVDR                | 2d   | 28 |
| FBgn0003217 | 550.69  | 53 | 1 | FEESISYPK                     | 12d  | 28 |
| FBgn0003217 | 871.92  | 51 | 1 | GPGSTDEDLQIGSKPIK             | 12d  | 28 |
| FBgn0003217 | 884.72  | 42 | 1 | LGNYAPIIVPPSWIVK              | 12d  | 28 |
| FBgn0003217 | 761.34  | 55 | 1 | ALGWGGGYTDEPIGK               | 36d  | 28 |
| FBgn0003217 | 761.32  | 46 | 2 | ALGWGGGYTDEPIGK               | 46d  | 28 |
| FBgn0003217 | 799.72  | 59 | 1 | VTPNDDVTDDHVDR                | 52d  | 28 |
| FBgn0003231 | 992.69  | 66 | 1 | AAEQTESPPQAEPTVTAEK           | 102d | 18 |
| FBgn0003231 | 1205.04 | 67 | 2 | IIDTTEGGDSGIFAPSTTPSAENK      | 102d | 18 |
| FBgn0003231 | 1205.19 | 50 | 2 | IIDTTEGGDSGIFAPSTTPSAENK      | 142d | 18 |
| FBgn0003256 | 1115.56 | 50 | 1 | IPVEEALAHPLYEQYYDPGDEPVAEVPFR | 62d  | 18 |
| FBgn0003256 | 1115.63 | 35 | 1 | IPVEEALAHPLYEQYYDPGDEPVAEVPFR | 112d | 18 |
| FBgn0003256 | 786.29  | 36 | 1 | LFPNADALALDLLGK               | 2d   | 28 |
| FBgn0003274 | 757.16  | 36 | 1 | LSSMPVGGGGAVAAVDAAPAAAAGGDK   | 2d   | 18 |
| FBgn0003274 | 1199.22 | 92 | 3 | LSSMPVGGGGAVAAVDAAPAAAAGGDK   | 2d   | 18 |

|             |         |     |   |                              |      |    |
|-------------|---------|-----|---|------------------------------|------|----|
| FBgn0003274 | 1135.07 | 106 | 1 | LSSMPVGGGGAVAAVDAAPAAAAGGDK  | 42d  | 18 |
| FBgn0003274 | 799.9   | 74  | 2 | LSSMPVGGGGAVAAVDAAPAAAAGGDKK | 42d  | 18 |
| FBgn0003274 | 1135.13 | 94  | 1 | LSSMPVGGGGAVAAVDAAPAAAAGGDK  | 112d | 18 |
| FBgn0003274 | 757.12  | 80  | 2 | LSSMPVGGGGAVAAVDAAPAAAAGGDK  | 122d | 18 |
| FBgn0003274 | 799.9   | 42  | 1 | LSSMPVGGGGAVAAVDAAPAAAAGGDKK | 132d | 18 |
| FBgn0003274 | 1135.13 | 104 | 2 | LSSMPVGGGGAVAAVDAAPAAAAGGDK  | 2d   | 28 |
| FBgn0003274 | 1199    | 97  | 3 | LSSMPVGGGGAVAAVDAAPAAAAGGDKK | 2d   | 28 |
| FBgn0003274 | 799.87  | 72  | 1 | LSSMPVGGGGAVAAVDAAPAAAAGGDKK | 36d  | 28 |
| FBgn0003274 | 799.85  | 55  | 1 | LSSMPVGGGGAVAAVDAAPAAAAGGDKK | 42d  | 28 |
| FBgn0003274 | 799.91  | 66  | 1 | LSSMPVGGGGAVAAVDAAPAAAAGGDKK | 46d  | 28 |
| FBgn0003274 | 1134.95 | 90  | 2 | LSSMPVGGGGAVAAVDAAPAAAAGGDK  | 56d  | 28 |
| FBgn0003279 | 1078.01 | 86  | 3 | GHVIDGVSEFPLVVSDEVQK         | 2d   | 18 |
| FBgn0003279 | 731.5   | 50  | 1 | GPLVVYDKDEGLR                | 2d   | 18 |
| FBgn0003279 | 948.13  | 35  | 1 | NIPGIETINVDKLNLLK            | 2d   | 18 |
| FBgn0003279 | 1077.92 | 80  | 1 | GHVIDGVSEFPLVVSDEVQK         | 22d  | 18 |
| FBgn0003279 | 1078.13 | 86  | 1 | GHVIDGVSEFPLVVSDEVQK         | 62d  | 18 |
| FBgn0003279 | 1077.96 | 78  | 2 | GHVIDGVSEFPLVVSDEVQK         | 82d  | 18 |
| FBgn0003279 | 1078.2  | 46  | 1 | GHVIDGVSEFPLVVSDEVQK         | 102d | 18 |
| FBgn0003279 | 1078.06 | 68  | 1 | GHVIDGVSEFPLVVSDEVQK         | 112d | 18 |
| FBgn0003279 | 1078.14 | 60  | 1 | GHVIDGVSEFPLVVSDEVQK         | 142d | 18 |
| FBgn0003279 | 1078.07 | 101 | 3 | GHVIDGVSEFPLVVSDEVQK         | 2d   | 28 |
| FBgn0003279 | 923.58  | 43  | 2 | YALVSAIAASGVPALVQSK          | 2d   | 28 |
| FBgn0003279 | 1078.05 | 84  | 3 | GHVIDGVSEFPLVVSDEVQK         | 12d  | 28 |
| FBgn0003279 | 1078.15 | 58  | 1 | GHVIDGVSEFPLVVSDEVQK         | 22d  | 28 |
| FBgn0003279 | 1078.05 | 92  | 2 | GHVIDGVSEFPLVVSDEVQK         | 42d  | 28 |
| FBgn0003279 | 948.08  | 39  | 1 | NIPGIETINVDKLNLLK            | 42d  | 28 |
| FBgn0003279 | 1077.96 | 75  | 1 | GHVIDGVSEFPLVVSDEVQK         | 52d  | 28 |
| FBgn0003360 | 572.83  | 38  | 3 | EQGFSSFWR                    | 2d   | 18 |
| FBgn0003360 | 490.54  | 66  | 3 | SDGIVGLYR                    | 2d   | 18 |
| FBgn0003360 | 572.92  | 36  | 2 | EQGFSSFWR                    | 22d  | 18 |
| FBgn0003360 | 490.64  | 34  | 1 | SDGIVGLYR                    | 22d  | 18 |
| FBgn0003360 | 641.98  | 50  | 1 | AAYFGFYDTAR                  | 42d  | 18 |

|             |        |    |   |                 |      |    |
|-------------|--------|----|---|-----------------|------|----|
| FBgn0003360 | 791.82 | 68 | 1 | GTGGAFVLVLYDEIK | 42d  | 18 |
| FBgn0003360 | 482.14 | 34 | 1 | QVFLGGVVK       | 42d  | 18 |
| FBgn0003360 | 490.58 | 46 | 2 | SDGIVGLYR       | 42d  | 18 |
| FBgn0003360 | 490.85 | 53 | 2 | SDGIVGLYR       | 62d  | 18 |
| FBgn0003360 | 490.72 | 61 | 1 | SDGIVGLYR       | 82d  | 18 |
| FBgn0003360 | 641.76 | 36 | 1 | AAYFGFYDTAR     | 102d | 18 |
| FBgn0003360 | 499.74 | 45 | 3 | DFDAVGFVK       | 102d | 18 |
| FBgn0003360 | 572.77 | 37 | 2 | EQGFSSFWR       | 102d | 18 |
| FBgn0003360 | 641.97 | 50 | 2 | AAYFGFYDTAR     | 112d | 18 |
| FBgn0003360 | 572.87 | 40 | 2 | EQGFSSFWR       | 112d | 18 |
| FBgn0003360 | 641.98 | 41 | 2 | AAYFGFYDTAR     | 122d | 18 |
| FBgn0003360 | 490.69 | 47 | 1 | SDGIVGLYR       | 122d | 18 |
| FBgn0003360 | 620.94 | 45 | 1 | EFTGLGNCLTK     | 132d | 18 |
| FBgn0003360 | 572.8  | 34 | 1 | EQGFSSFWR       | 132d | 18 |
| FBgn0003360 | 439.84 | 55 | 3 | GAFSNILR        | 132d | 18 |
| FBgn0003360 | 490.9  | 47 | 3 | SDGIVGLYR       | 132d | 18 |
| FBgn0003360 | 641.96 | 36 | 1 | AAYFGFYDTAR     | 142d | 18 |
| FBgn0003360 | 572.85 | 36 | 1 | EQGFSSFWR       | 142d | 18 |
| FBgn0003360 | 641.77 | 46 | 1 | AAYFGFYDTAR     | 2d   | 28 |
| FBgn0003360 | 490.65 | 43 | 3 | SDGIVGLYR       | 2d   | 28 |
| FBgn0003360 | 572.77 | 39 | 2 | EQGFSSFWR       | 12d  | 28 |
| FBgn0003360 | 439.53 | 52 | 2 | GAFSNILR        | 12d  | 28 |
| FBgn0003360 | 490.9  | 38 | 1 | SDGIVGLYR       | 12d  | 28 |
| FBgn0003360 | 572.27 | 36 | 1 | EQGFSSFWR       | 22d  | 28 |
| FBgn0003360 | 490.7  | 66 | 2 | SDGIVGLYR       | 22d  | 28 |
| FBgn0003360 | 572.61 | 36 | 1 | EQGFSSFWR       | 32d  | 28 |
| FBgn0003360 | 658.3  | 52 | 2 | NLHCWATIAK      | 32d  | 28 |
| FBgn0003360 | 490.85 | 53 | 3 | SDGIVGLYR       | 32d  | 28 |
| FBgn0003360 | 572.77 | 37 | 1 | EQGFSSFWR       | 36d  | 28 |
| FBgn0003360 | 658.28 | 48 | 2 | NLHCWATIAK      | 36d  | 28 |
| FBgn0003360 | 490.73 | 42 | 1 | SDGIVGLYR       | 36d  | 28 |
| FBgn0003360 | 490.49 | 38 | 1 | SDGIVGLYR       | 42d  | 28 |

|             |         |    |   |                          |      |    |
|-------------|---------|----|---|--------------------------|------|----|
| FBgn0003360 | 658.31  | 71 | 2 | NTLHCWATIAK              | 46d  | 28 |
| FBgn0003360 | 490.71  | 48 | 2 | SDGIVGLYR                | 46d  | 28 |
| FBgn0003360 | 572.57  | 36 | 1 | EQGFSSFWR                | 50d  | 28 |
| FBgn0003360 | 490.91  | 44 | 1 | SDGIVGLYR                | 52d  | 28 |
| FBgn0003371 | 954.74  | 48 | 1 | DIKPQNLLLDPETAVLK        | 62d  | 18 |
| FBgn0003371 | 730.41  | 37 | 1 | TPTEAINLVSLLEYP SAR      | 112d | 18 |
| FBgn0003392 | 832.03  | 41 | 1 | AGVYPEKQETQENGDEEGQE QK  | 2d   | 18 |
| FBgn0003392 | 919.79  | 39 | 1 | AMLQMIQQLQSDFER          | 42d  | 18 |
| FBgn0003392 | 779.59  | 73 | 2 | DALQIIGDVSMATVSSPLPP PVK | 42d  | 18 |
| FBgn0003392 | 819.97  | 48 | 1 | VGLFTPDMAFEAIVK          | 42d  | 18 |
| FBgn0003392 | 549.31  | 37 | 3 | GISNIPINLR               | 62d  | 18 |
| FBgn0003392 | 827.59  | 59 | 2 | VAIGDQPV DIEQQIK         | 102d | 18 |
| FBgn0003392 | 826.85  | 48 | 2 | VAIGDQPV DIEQQIK         | 122d | 18 |
| FBgn0003392 | 540.8   | 47 | 1 | SSVLENFV GK              | 2d   | 28 |
| FBgn0003392 | 953.49  | 86 | 2 | TIEGSGSALVNTNELSGG AK    | 2d   | 28 |
| FBgn0003392 | 827.53  | 58 | 1 | VAIGDQPV DIEQQIK         | 2d   | 28 |
| FBgn0003392 | 953.37  | 68 | 2 | TIEGSGSALVNTNELSGG AK    | 12d  | 28 |
| FBgn0003392 | 827.48  | 48 | 3 | VAIGDQPV DIEQQIK         | 12d  | 28 |
| FBgn0003392 | 827.63  | 56 | 3 | VAIGDQPV DIEQQIK         | 32d  | 28 |
| FBgn0003392 | 1168.75 | 60 | 1 | DALQIIGDVSMATVSSPLPP PVK | 36d  | 28 |
| FBgn0003392 | 827.48  | 41 | 2 | VAIGDQPV DIEQQIK         | 36d  | 28 |
| FBgn0003392 | 1168.54 | 43 | 2 | DALQIIGDVSMATVSSPLPP PVK | 42d  | 28 |
| FBgn0003392 | 827.5   | 36 | 1 | VAIGDQPV DIEQQIK         | 42d  | 28 |
| FBgn0003392 | 779.58  | 58 | 1 | DALQIIGDVSMATVSSPLPP PVK | 46d  | 28 |
| FBgn0003392 | 827.51  | 48 | 2 | VAIGDQPV DIEQQIK         | 46d  | 28 |
| FBgn0003392 | 953.37  | 53 | 1 | TIEGSGSALVNTNELSGG AK    | 50d  | 28 |
| FBgn0003392 | 1047.79 | 35 | 1 | VYSPHVLNLT LIDLPLGLTK    | 50d  | 28 |
| FBgn0003392 | 827.37  | 49 | 1 | VAIGDQPV DIEQQIK         | 52d  | 28 |
| FBgn0003392 | 953.28  | 57 | 2 | TIEGSGSALVNTNELSGG AK    | 56d  | 28 |
| FBgn0003392 | 827.25  | 68 | 1 | VAIGDQPV DIEQQIK         | 56d  | 28 |
| FBgn0003423 | 825.62  | 84 | 1 | DPLDV SFNDPIAAFK         | 2d   | 18 |
| FBgn0003423 | 1206.66 | 71 | 2 | SLGYDPVNPTFEAT TDMYHR    | 2d   | 18 |

|             |         |     |   |                           |      |    |
|-------------|---------|-----|---|---------------------------|------|----|
| FBgn0003423 | 825.48  | 71  | 2 | DPLDVSFNDPIAAFK           | 42d  | 18 |
| FBgn0003423 | 662.4   | 67  | 1 | EVESVSSAGDKK              | 42d  | 18 |
| FBgn0003423 | 825.56  | 86  | 2 | DPLDVSFNDPIAAFK           | 62d  | 18 |
| FBgn0003423 | 921.49  | 55  | 2 | EGILHLFPWSGIVDEDSQLSDTFR  | 62d  | 18 |
| FBgn0003423 | 422.72  | 41  | 1 | LLLSEIR                   | 62d  | 18 |
| FBgn0003423 | 825.56  | 79  | 1 | DPLDVSFNDPIAAFK           | 82d  | 18 |
| FBgn0003423 | 825.32  | 84  | 2 | DPLDVSFNDPIAAFK           | 102d | 18 |
| FBgn0003423 | 661.27  | 39  | 1 | EVESVSSAGDKK              | 102d | 18 |
| FBgn0003423 | 825.41  | 62  | 2 | DPLDVSFNDPIAAFK           | 122d | 18 |
| FBgn0003423 | 1206.59 | 69  | 1 | SLGYDPDPVNPTFEATTDYHR     | 122d | 18 |
| FBgn0003423 | 825.35  | 73  | 1 | DPLDVSFNDPIAAFK           | 142d | 18 |
| FBgn0003423 | 506.32  | 41  | 2 | NPSAGSPQR                 | 2d   | 28 |
| FBgn0003423 | 448.25  | 40  | 1 | NMEIFIK                   | 12d  | 28 |
| FBgn0003423 | 825.51  | 76  | 1 | DPLDVSFNDPIAAFK           | 22d  | 28 |
| FBgn0003423 | 825.1   | 77  | 2 | DPLDVSFNDPIAAFK           | 32d  | 28 |
| FBgn0003423 | 928.62  | 71  | 2 | SFGVKPILDYSVEEDITQEEAEKR  | 36d  | 28 |
| FBgn0003423 | 825.54  | 75  | 1 | DPLDVSFNDPIAAFK           | 42d  | 28 |
| FBgn0003423 | 921.47  | 34  | 1 | EGILHLFPWSGIVDEDSQLSDTFR  | 42d  | 28 |
| FBgn0003423 | 506.09  | 63  | 1 | NPSAGSPQR                 | 42d  | 28 |
| FBgn0003423 | 928.34  | 42  | 1 | SFGVKPILDYSVEEDITQEEAEKR  | 42d  | 28 |
| FBgn0003423 | 842.48  | 58  | 1 | ATFYGHFVAGEDQIK           | 46d  | 28 |
| FBgn0003423 | 825.53  | 67  | 2 | DPLDVSFNDPIAAFK           | 52d  | 28 |
| FBgn0003423 | 771.8   | 36  | 1 | IGIMVASHNEDTVR            | 52d  | 28 |
| FBgn0003423 | 825.63  | 66  | 1 | DPLDVSFNDPIAAFK           | 56d  | 28 |
| FBgn0003423 | 662.36  | 61  | 2 | EVESVSSAGDKK              | 56d  | 28 |
| FBgn0003432 | 1000.57 | 100 | 1 | REEEYTVTTAPVFVTK          | 2d   | 18 |
| FBgn0003432 | 822.81  | 65  | 2 | SIYLESQHETALPR            | 2d   | 18 |
| FBgn0003432 | 641.52  | 76  | 1 | VTSSTGQVESSAK             | 2d   | 18 |
| FBgn0003432 | 1127.94 | 70  | 3 | VVAANPIGESEPTESDPVTITK    | 42d  | 18 |
| FBgn0003432 | 1067.34 | 43  | 1 | VVESEAPVAEEVFSEAPESK      | 42d  | 18 |
| FBgn0003432 | 1298.68 | 44  | 1 | VVAVSEDVLPVEEVVPTTEETPEAK | 62d  | 18 |
| FBgn0003432 | 877.97  | 37  | 1 | LKPEFAALEPIKIER           | 82d  | 18 |

|             |         |     |   |                           |      |    |
|-------------|---------|-----|---|---------------------------|------|----|
| FBgn0003432 | 345.18  | 35  | 1 | TIFPPVFGR                 | 112d | 18 |
| FBgn0003432 | 1128.32 | 52  | 1 | VVAANPIGESEPTESDPVTITK    | 132d | 18 |
| FBgn0003432 | 822.73  | 58  | 1 | SIYLESQHETALPR            | 2d   | 28 |
| FBgn0003432 | 1128.26 | 81  | 2 | VVAANPIGESEPTESDPVTITK    | 2d   | 28 |
| FBgn0003432 | 1298.51 | 45  | 1 | VVAVSEDVLPPEEEVVPTEETPEAK | 2d   | 28 |
| FBgn0003432 | 823.12  | 36  | 1 | SIYLESQHETALPR            | 12d  | 28 |
| FBgn0003432 | 1298.39 | 34  | 1 | VVAVSEDVLPPEEEVVPTEETPEAK | 56d  | 28 |
| FBgn0003462 | 899.75  | 87  | 2 | HLGDLGNIEATGDCPTK         | 2d   | 18 |
| FBgn0003462 | 899.7   | 97  | 2 | HLGDLGNIEATGDCPTK         | 22d  | 18 |
| FBgn0003462 | 899.52  | 101 | 1 | HLGDLGNIEATGDCPTK         | 42d  | 18 |
| FBgn0003462 | 632.25  | 73  | 4 | ITLFGADSIIGR              | 42d  | 18 |
| FBgn0003462 | 807.63  | 67  | 1 | GTVFFEQESSGTPVK           | 62d  | 18 |
| FBgn0003462 | 632.31  | 77  | 2 | ITLFGADSIIGR              | 62d  | 18 |
| FBgn0003462 | 899.95  | 100 | 3 | HLGDLGNIEATGDCPTK         | 82d  | 18 |
| FBgn0003462 | 807.6   | 58  | 1 | GTVFFEQESSGTPVK           | 112d | 18 |
| FBgn0003462 | 807.57  | 60  | 2 | GTVFFEQESSGTPVK           | 2d   | 28 |
| FBgn0003462 | 899.74  | 104 | 3 | HLGDLGNIEATGDCPTK         | 2d   | 28 |
| FBgn0003462 | 807.51  | 46  | 1 | GTVFFEQESSGTPVK           | 12d  | 28 |
| FBgn0003462 | 899.7   | 103 | 3 | HLGDLGNIEATGDCPTK         | 12d  | 28 |
| FBgn0003462 | 632.4   | 61  | 1 | ITLFGADSIIGR              | 12d  | 28 |
| FBgn0003462 | 632.2   | 81  | 2 | ITLFGADSIIGR              | 22d  | 28 |
| FBgn0003462 | 807.61  | 62  | 1 | GTVFFEQESSGTPVK           | 32d  | 28 |
| FBgn0003462 | 899.85  | 86  | 2 | HLGDLGNIEATGDCPTK         | 32d  | 28 |
| FBgn0003462 | 632.37  | 81  | 3 | ITLFGADSIIGR              | 32d  | 28 |
| FBgn0003462 | 807.34  | 50  | 1 | GTVFFEQESSGTPVK           | 36d  | 28 |
| FBgn0003462 | 632.5   | 81  | 4 | ITLFGADSIIGR              | 36d  | 28 |
| FBgn0003462 | 807.26  | 59  | 3 | GTVFFEQESSGTPVK           | 42d  | 28 |
| FBgn0003462 | 632.41  | 76  | 3 | ITLFGADSIIGR              | 42d  | 28 |
| FBgn0003462 | 683.73  | 52  | 1 | TVVVHADADDLGQGGHELK       | 42d  | 28 |
| FBgn0003462 | 807.49  | 37  | 1 | GTVFFEQESSGTPVK           | 46d  | 28 |
| FBgn0003462 | 632.54  | 81  | 3 | ITLFGADSIIGR              | 50d  | 28 |
| FBgn0003462 | 807.49  | 47  | 1 | GTVFFEQESSGTPVK           | 52d  | 28 |

|             |         |     |   |                            |     |    |
|-------------|---------|-----|---|----------------------------|-----|----|
| FBgn0003462 | 899.87  | 90  | 2 | HLGDLGNIEATGDCPTK          | 52d | 28 |
| FBgn0003462 | 632.58  | 80  | 3 | ITLFGADSIIGR               | 56d | 28 |
| FBgn0003462 | 683.74  | 43  | 1 | TVVVHADADDLGQGGHELK        | 56d | 28 |
| FBgn0003470 | 969.97  | 91  | 3 | ADVVESWIDDKENYVR           | 2d  | 18 |
| FBgn0003470 | 1420.93 | 86  | 3 | AGTFGAFEQFGNELLQANHYASPEIK | 2d  | 18 |
| FBgn0003470 | 1150.14 | 117 | 2 | ASAFNSWFENAEEDLTDVPR       | 2d  | 18 |
| FBgn0003470 | 853.8   | 88  | 2 | DQLINASHAQSPAILK           | 2d  | 18 |
| FBgn0003470 | 761.39  | 76  | 2 | FIESGHFDADNIR              | 2d  | 18 |
| FBgn0003470 | 827.42  | 34  | 1 | HANLFHQWLTETR              | 2d  | 18 |
| FBgn0003470 | 1363.66 | 61  | 2 | IAALQTVADQLIAQNHYASNLVDEK  | 2d  | 18 |
| FBgn0003470 | 794.41  | 43  | 1 | IQSVLAMGGNLDKK             | 2d  | 18 |
| FBgn0003470 | 1321.14 | 96  | 2 | KHEALVSDLEAFGNTIQALQEQAQ   | 2d  | 18 |
| FBgn0003470 | 1450.55 | 45  | 1 | LDESLTYQQFLAQVEEEEAWITEK   | 2d  | 18 |
| FBgn0003470 | 860.71  | 48  | 2 | LMQSHPDTAEQTYAK            | 2d  | 18 |
| FBgn0003470 | 1011.4  | 57  | 1 | LQAASEESYRDPTNLQAK         | 2d  | 18 |
| FBgn0003470 | 1018.4  | 77  | 3 | LQLATEESYKDPANIQSK         | 2d  | 18 |
| FBgn0003470 | 873.72  | 86  | 2 | LTQIADQWEYLTHK             | 2d  | 18 |
| FBgn0003470 | 1189.57 | 78  | 1 | QEAFLANEDLGDSLDSVEALIK     | 2d  | 18 |
| FBgn0003470 | 909.7   | 85  | 2 | SRIEDITNVGTELIEK           | 2d  | 18 |
| FBgn0003470 | 1328.08 | 43  | 2 | TIEDIELWLSEIEGQLLSEDHGK    | 2d  | 18 |
| FBgn0003470 | 559.1   | 64  | 1 | VTEVNQLADK                 | 2d  | 18 |
| FBgn0003470 | 1304.01 | 56  | 1 | YTEHSTVGLAQQWDQLDQLSMR     | 2d  | 18 |
| FBgn0003470 | 979.99  | 54  | 2 | ETENVQSYEEIENAFR           | 22d | 18 |
| FBgn0003470 | 851.07  | 41  | 1 | LMDVSNLGVPEIEQR            | 22d | 18 |
| FBgn0003470 | 1150.16 | 104 | 1 | ASAFNSWFENAEEDLTDVPR       | 42d | 18 |
| FBgn0003470 | 717.5   | 85  | 2 | DADEIENWIAEK               | 42d | 18 |
| FBgn0003470 | 979.89  | 59  | 1 | ETENVQSYEEIENAFR           | 42d | 18 |
| FBgn0003470 | 574.44  | 49  | 1 | LMQSHPDTAEQTYAK            | 42d | 18 |
| FBgn0003470 | 874.05  | 58  | 1 | LTQIADQWEYLTHK             | 42d | 18 |
| FBgn0003470 | 659.79  | 35  | 1 | WNNLQTLTAEK                | 42d | 18 |
| FBgn0003470 | 970.04  | 78  | 3 | ADVVESWIDDKENYVR           | 62d | 18 |
| FBgn0003470 | 572.86  | 47  | 1 | ALNQAWAELK                 | 62d | 18 |

|             |         |     |   |                            |      |    |
|-------------|---------|-----|---|----------------------------|------|----|
| FBgn0003470 | 1150.18 | 86  | 1 | ASAFNSWFENAEEDLTDPVR       | 62d  | 18 |
| FBgn0003470 | 1128.26 | 77  | 1 | DLDFWLGEVESLLTTEDSGK       | 62d  | 18 |
| FBgn0003470 | 1363.6  | 45  | 1 | IAALQTVADQLIAQNHYASNLVDEK  | 62d  | 18 |
| FBgn0003470 | 1018.34 | 70  | 1 | LQLATEESYKDPANIQSK         | 62d  | 18 |
| FBgn0003470 | 874.02  | 46  | 1 | LTQIADQWEYLTHK             | 62d  | 18 |
| FBgn0003470 | 659.65  | 38  | 1 | WNNLQTLTAEK                | 62d  | 18 |
| FBgn0003470 | 736.96  | 64  | 1 | DADELESWIHEK               | 82d  | 18 |
| FBgn0003470 | 902.88  | 45  | 1 | DKETFVTADEFGQDLEHVEVLQR    | 82d  | 18 |
| FBgn0003470 | 788.14  | 46  | 1 | IEDITNVGTELIEK             | 82d  | 18 |
| FBgn0003470 | 1150.21 | 83  | 1 | ASAFNSWFENAEEDLTDPVR       | 102d | 18 |
| FBgn0003470 | 902.94  | 48  | 1 | DKETFVTADEFGQDLEHVEVLQR    | 102d | 18 |
| FBgn0003470 | 1321.15 | 65  | 2 | KHEALVSDLEAFGNTIQALQEQAQK  | 102d | 18 |
| FBgn0003470 | 849.78  | 49  | 1 | QETFDAGLNAFEQEGIHNTALK     | 102d | 18 |
| FBgn0003470 | 673.08  | 34  | 1 | RQNQINSQYDNLLALAR          | 102d | 18 |
| FBgn0003470 | 970.2   | 59  | 1 | ADVVESWIDDKENYVR           | 112d | 18 |
| FBgn0003470 | 947.11  | 49  | 1 | AGTFGAFEQFGNELLQANHYASPEIK | 112d | 18 |
| FBgn0003470 | 1321.36 | 72  | 1 | KHEALVSDLEAFGNTIQALQEQAQK  | 112d | 18 |
| FBgn0003470 | 1018.47 | 53  | 1 | LQLATEESYKDPANIQSK         | 112d | 18 |
| FBgn0003470 | 1189.46 | 104 | 2 | QEAFLANEDLGDSLDSVEALIK     | 112d | 18 |
| FBgn0003470 | 909.7   | 92  | 2 | SRIEDITNVGTELIEK           | 112d | 18 |
| FBgn0003470 | 572.94  | 42  | 1 | ALNQAWAELK                 | 122d | 18 |
| FBgn0003470 | 1150.24 | 88  | 1 | ASAFNSWFENAEEDLTDPVR       | 122d | 18 |
| FBgn0003470 | 1321.32 | 52  | 1 | KHEALVSDLEAFGNTIQALQEQAQK  | 122d | 18 |
| FBgn0003470 | 1011.36 | 40  | 1 | LQAASEESYRDPTNLQAK         | 122d | 18 |
| FBgn0003470 | 1018.52 | 61  | 2 | LQLATEESYKDPANIQSK         | 122d | 18 |
| FBgn0003470 | 572.85  | 53  | 2 | ALNQAWAELK                 | 132d | 18 |
| FBgn0003470 | 902.71  | 49  | 1 | DKETFVTADEFGQDLEHVEVLQR    | 132d | 18 |
| FBgn0003470 | 854.19  | 60  | 1 | DQLINASHAQSPAILK           | 132d | 18 |
| FBgn0003470 | 1321.29 | 55  | 1 | KHEALVSDLEAFGNTIQALQEQAQK  | 132d | 18 |
| FBgn0003470 | 522.99  | 40  | 1 | LDNLSALAAR                 | 132d | 18 |
| FBgn0003470 | 1189.73 | 72  | 1 | QEAFLANEDLGDSLDSVEALIK     | 132d | 18 |
| FBgn0003470 | 970.17  | 86  | 1 | ADVVESWIDDKENYVR           | 142d | 18 |



|             |         |    |   |                            |      |    |
|-------------|---------|----|---|----------------------------|------|----|
| FBgn0003470 | 551.72  | 40 | 2 | HANLFHQWLTETR              | 142d | 18 |
| FBgn0003470 | 969.81  | 49 | 1 | ADVVESWIDDKENYVR           | 2d   | 28 |
| FBgn0003470 | 947.49  | 48 | 1 | AGTFGAFEQFGNELLQANHYASPEIK | 2d   | 28 |
| FBgn0003470 | 1150.09 | 98 | 1 | ASAFNSWFENAEEDLTDTPVR      | 2d   | 28 |
| FBgn0003470 | 736.84  | 70 | 1 | DADELESWIHEK               | 2d   | 28 |
| FBgn0003470 | 853.86  | 90 | 3 | DQLINASHAQSPAILK           | 2d   | 28 |
| FBgn0003470 | 613.92  | 48 | 1 | DVVLSSDDYGR                | 2d   | 28 |
| FBgn0003470 | 979.87  | 48 | 1 | ETENVQSYEEIENAFR           | 2d   | 28 |
| FBgn0003470 | 886.36  | 36 | 1 | FATDDSYPDPTNLNGK           | 2d   | 28 |
| FBgn0003470 | 761.5   | 73 | 3 | FIESGHFDADNIR              | 2d   | 28 |
| FBgn0003470 | 909.48  | 39 | 1 | IAALQTVADQLIAQNHYASNLVDEK  | 2d   | 28 |
| FBgn0003470 | 836.76  | 73 | 3 | LIDGQHYAADDVAQR            | 2d   | 28 |
| FBgn0003470 | 850.87  | 51 | 1 | LMDVSNLGVPEIEQR            | 2d   | 28 |
| FBgn0003470 | 860.75  | 55 | 3 | LMQSHPDTAEQTYAK            | 2d   | 28 |
| FBgn0003470 | 1011.29 | 66 | 1 | LQAASEESYRDPTNLQAK         | 2d   | 28 |
| FBgn0003470 | 1018.51 | 93 | 2 | LQLATEESYKDPANIQSK         | 2d   | 28 |
| FBgn0003470 | 874.17  | 93 | 3 | LTQIADQWEYLTHK             | 2d   | 28 |
| FBgn0003470 | 1189.51 | 90 | 2 | QEAFLANEDLGDSDLDSVEALIK    | 2d   | 28 |
| FBgn0003470 | 909.54  | 84 | 2 | SRIEDITNVGTELIEK           | 2d   | 28 |
| FBgn0003470 | 1304.03 | 70 | 2 | YTEHSTVGLAQQWDQLDQLSMR     | 2d   | 28 |
| FBgn0003470 | 969.8   | 54 | 2 | ADVVESWIDDKENYVR           | 12d  | 28 |
| FBgn0003470 | 1149.84 | 96 | 2 | ASAFNSWFENAEEDLTDTPVR      | 12d  | 28 |
| FBgn0003470 | 736.72  | 56 | 1 | DADELESWIHEK               | 12d  | 28 |
| FBgn0003470 | 551.93  | 40 | 1 | HANLFHQWLTETR              | 12d  | 28 |
| FBgn0003470 | 793.97  | 34 | 1 | IQSVLAMGGNLIDKK            | 12d  | 28 |
| FBgn0003470 | 1321.29 | 81 | 1 | KHEALVSDLEAFGNTIQALQEQAQ   | 12d  | 28 |
| FBgn0003470 | 1450.79 | 34 | 1 | LDESLTYQQFLAQVEEEEAWITEK   | 12d  | 28 |
| FBgn0003470 | 837.01  | 58 | 2 | LIDGQHYAADDVAQR            | 12d  | 28 |
| FBgn0003470 | 860.9   | 58 | 1 | LMQSHPDTAEQTYAK            | 12d  | 28 |
| FBgn0003470 | 1011.58 | 63 | 2 | LQAASEESYRDPTNLQAK         | 12d  | 28 |
| FBgn0003470 | 1018.33 | 69 | 3 | LQLATEESYKDPANIQSK         | 12d  | 28 |
| FBgn0003470 | 874     | 76 | 1 | LTQIADQWEYLTHK             | 12d  | 28 |

|             |         |     |   |                            |     |    |
|-------------|---------|-----|---|----------------------------|-----|----|
| FBgn0003470 | 1189.82 | 89  | 2 | QEAFLANEDLGDSLDSVEALIK     | 12d | 28 |
| FBgn0003470 | 909.6   | 89  | 2 | SRIEDITNVGTELIEK           | 12d | 28 |
| FBgn0003470 | 646.9   | 59  | 2 | ADVVESWIDDKENYVR           | 22d | 28 |
| FBgn0003470 | 902.91  | 42  | 1 | DKETFVTADEFGQDLEHVEVLQR    | 22d | 28 |
| FBgn0003470 | 970.14  | 64  | 3 | ADVVESWIDDKENYVR           | 32d | 28 |
| FBgn0003470 | 1150.18 | 96  | 3 | ASAFNSWFENAEEDLTDPVR       | 32d | 28 |
| FBgn0003470 | 761.26  | 74  | 1 | FIESGHFDADNIR              | 32d | 28 |
| FBgn0003470 | 909.62  | 42  | 1 | IAALQTVADQLIAQNHYASNLVDEK  | 32d | 28 |
| FBgn0003470 | 873.98  | 64  | 1 | LTQIADQWEYLTHK             | 32d | 28 |
| FBgn0003470 | 647.05  | 35  | 1 | ADVVESWIDDKENYVR           | 36d | 28 |
| FBgn0003470 | 947.52  | 49  | 1 | AGTFGAFEQFGNELLQANHYASPEIK | 36d | 28 |
| FBgn0003470 | 1149.85 | 90  | 3 | ASAFNSWFENAEEDLTDPVR       | 36d | 28 |
| FBgn0003470 | 980.04  | 74  | 1 | ETENVQSYEEIENAFR           | 36d | 28 |
| FBgn0003470 | 881.03  | 58  | 1 | KHEALVSDLEAFGNTIQALQEQAQ   | 36d | 28 |
| FBgn0003470 | 1189.6  | 61  | 1 | QEAFLANEDLGDSLDSVEALIK     | 36d | 28 |
| FBgn0003470 | 970.1   | 70  | 3 | ADVVESWIDDKENYVR           | 42d | 28 |
| FBgn0003470 | 572.84  | 39  | 1 | ALNQAWAELK                 | 42d | 28 |
| FBgn0003470 | 1150.16 | 117 | 2 | ASAFNSWFENAEEDLTDPVR       | 42d | 28 |
| FBgn0003470 | 761.43  | 65  | 2 | FIESGHFDADNIR              | 42d | 28 |
| FBgn0003470 | 552.02  | 49  | 1 | HANLFHQWLTETR              | 42d | 28 |
| FBgn0003470 | 1321.1  | 70  | 2 | KHEALVSDLEAFGNTIQALQEQAQ   | 42d | 28 |
| FBgn0003470 | 1189.53 | 38  | 1 | QEAFLANEDLGDSLDSVEALIK     | 42d | 28 |
| FBgn0003470 | 552.11  | 37  | 1 | HANLFHQWLTETR              | 46d | 28 |
| FBgn0003470 | 702.79  | 56  | 1 | KIEELGALLEEHLILDNR         | 46d | 28 |
| FBgn0003470 | 969.99  | 61  | 1 | ADVVESWIDDKENYVR           | 50d | 28 |
| FBgn0003470 | 761.27  | 71  | 2 | FIESGHFDADNIR              | 50d | 28 |
| FBgn0003470 | 860.89  | 44  | 1 | LMQSHPDTAEQTYAK            | 50d | 28 |
| FBgn0003470 | 1018.28 | 88  | 2 | LQLATEESYKDPANIQSK         | 50d | 28 |
| FBgn0003470 | 962.55  | 36  | 1 | DAHAQFQASLSSAEADFK         | 52d | 28 |
| FBgn0003470 | 903.46  | 43  | 1 | DKENHAQIADVVGEDLEEVEVLQK   | 52d | 28 |
| FBgn0003470 | 737.61  | 47  | 1 | LEALQEQQWNTLK              | 52d | 28 |
| FBgn0003470 | 1018.15 | 75  | 3 | LQLATEESYKDPANIQSK         | 52d | 28 |

|             |         |     |   |                         |     |    |
|-------------|---------|-----|---|-------------------------|-----|----|
| FBgn0003470 | 1274.08 | 60  | 1 | QETFDAGLNAFEQEGIHNTALK  | 52d | 28 |
| FBgn0003470 | 736.83  | 48  | 2 | DADELESWIHEK            | 56d | 28 |
| FBgn0003470 | 902.87  | 70  | 1 | DKETFVTADEFGQDLEHVEVLQR | 56d | 28 |
| FBgn0003470 | 980     | 42  | 1 | ETENVQSYEEIENAFR        | 56d | 28 |
| FBgn0003470 | 860.55  | 37  | 1 | LMQSHPDTAEQTYAK         | 56d | 28 |
| FBgn0003470 | 603.86  | 41  | 1 | SSLLSLWEDR              | 56d | 28 |
| FBgn0003471 | 990.99  | 56  | 1 | ALESEITSHDPQLQNVAK      | 2d  | 18 |
| FBgn0003471 | 583.02  | 70  | 1 | AQSDSTAVAASR            | 2d  | 18 |
| FBgn0003471 | 857.72  | 86  | 2 | DDTPVNLEQAENQLK         | 2d  | 18 |
| FBgn0003471 | 1045.21 | 57  | 1 | DNLNESWQDLELIETR        | 2d  | 18 |
| FBgn0003471 | 893.16  | 42  | 1 | DVSGVELLMNNHQSLK        | 2d  | 18 |
| FBgn0003471 | 1215.54 | 91  | 3 | EVVAGSQELGQDFDHVTLLSER  | 2d  | 18 |
| FBgn0003471 | 1093.63 | 101 | 1 | GEPSYDLQNAAIEIASDYTK    | 2d  | 18 |
| FBgn0003471 | 773.31  | 70  | 2 | GGTPGAGEGHEGYVTR        | 2d  | 18 |
| FBgn0003471 | 1030.57 | 62  | 1 | IVSSEDVGRDEANVQSLLK     | 2d  | 18 |
| FBgn0003471 | 926.53  | 59  | 2 | KHEAIETDIFAYEER         | 2d  | 18 |
| FBgn0003471 | 856.99  | 53  | 1 | MVHDYENFTSDLLK          | 2d  | 18 |
| FBgn0003471 | 637.36  | 55  | 3 | NYAEVIDALHK             | 2d  | 18 |
| FBgn0003471 | 943.83  | 106 | 3 | TNAIHNLNNAFDVAEDK       | 2d  | 18 |
| FBgn0003471 | 1010.51 | 84  | 3 | TQTDVASEDTPTSLPEAEK     | 2d  | 18 |
| FBgn0003471 | 794.72  | 58  | 3 | VGSELITEGHFGADR         | 2d  | 18 |
| FBgn0003471 | 1206.11 | 64  | 2 | VNGIADNLIQAGHSDSATIAEWK | 2d  | 18 |
| FBgn0003471 | 687.51  | 51  | 2 | IVSSEDVGRDEANVQSLLK     | 22d | 18 |
| FBgn0003471 | 697.5   | 53  | 1 | KFEALISDLTQK            | 22d | 18 |
| FBgn0003471 | 983.94  | 46  | 1 | LVSQDNFGFDLAAVEAAAK     | 22d | 18 |
| FBgn0003471 | 637.08  | 49  | 2 | NYAEVIDALHK             | 22d | 18 |
| FBgn0003471 | 943.87  | 89  | 3 | TNAIHNLNNAFDVAEDK       | 22d | 18 |
| FBgn0003471 | 1010.26 | 101 | 2 | TQTDVASEDTPTSLPEAEK     | 22d | 18 |
| FBgn0003471 | 794.73  | 42  | 2 | VGSELITEGHFGADR         | 22d | 18 |
| FBgn0003471 | 717.61  | 81  | 3 | WIETTIQSLGER            | 22d | 18 |
| FBgn0003471 | 582.91  | 76  | 3 | AQSDSTAVAASR            | 42d | 18 |
| FBgn0003471 | 760.43  | 51  | 1 | EVDDLEQWITDR            | 42d | 18 |

|             |         |     |   |                           |      |    |
|-------------|---------|-----|---|---------------------------|------|----|
| FBgn0003471 | 984.14  | 92  | 3 | LVSQDNFGFDLAAVEAAAK       | 42d  | 18 |
| FBgn0003471 | 943.94  | 100 | 3 | TNAIHNLNNAFDVAEDK         | 42d  | 18 |
| FBgn0003471 | 1010.27 | 97  | 3 | TQTDVASEDTPTSLPEAEK       | 42d  | 18 |
| FBgn0003471 | 717.27  | 78  | 3 | WIETTIQSLGER              | 42d  | 18 |
| FBgn0003471 | 1045.18 | 56  | 1 | DNLNESWQDLLELIETR         | 62d  | 18 |
| FBgn0003471 | 878.86  | 71  | 2 | LLDAEDVFVEHPDEK           | 62d  | 18 |
| FBgn0003471 | 984     | 67  | 1 | LVSQDNFGFDLAAVEAAAK       | 62d  | 18 |
| FBgn0003471 | 637.44  | 38  | 1 | NYAEVIDALHK               | 62d  | 18 |
| FBgn0003471 | 943.64  | 41  | 1 | TNAIHNLNNAFDVAEDK         | 62d  | 18 |
| FBgn0003471 | 794.92  | 60  | 3 | VGSELITEGHFGADR           | 62d  | 18 |
| FBgn0003471 | 1206.17 | 57  | 1 | VNGIADNLIQAGHSDSATIAEWK   | 62d  | 18 |
| FBgn0003471 | 991.07  | 49  | 2 | ALESEITSHDPQLQNVAK        | 82d  | 18 |
| FBgn0003471 | 1045.22 | 41  | 1 | DNLNESWQDLLELIETR         | 82d  | 18 |
| FBgn0003471 | 1192.92 | 35  | 1 | EVLVQQTCCDDIDSYITDLEK     | 82d  | 18 |
| FBgn0003471 | 879.02  | 86  | 1 | LLDAEDVFVEHPDEK           | 82d  | 18 |
| FBgn0003471 | 944.13  | 83  | 3 | TNAIHNLNNAFDVAEDK         | 82d  | 18 |
| FBgn0003471 | 991.11  | 44  | 1 | ALESEITSHDPQLQNVAK        | 102d | 18 |
| FBgn0003471 | 857.95  | 72  | 1 | DDTPVNLEQAENQLK           | 102d | 18 |
| FBgn0003471 | 1215.51 | 78  | 2 | EVVAGSQELGQDFDHVTLLSER    | 102d | 18 |
| FBgn0003471 | 637.53  | 54  | 2 | NYAEVIDALHK               | 102d | 18 |
| FBgn0003471 | 1411.86 | 47  | 1 | WDPSQGPNGNEYIDEYEYDGGNSSR | 102d | 18 |
| FBgn0003471 | 717.37  | 58  | 1 | WIETTIQSLGER              | 102d | 18 |
| FBgn0003471 | 858.15  | 62  | 1 | DDTPVNLEQAENQLK           | 112d | 18 |
| FBgn0003471 | 1193.07 | 62  | 2 | EVLVQQTCCDDIDSYITDLEK     | 112d | 18 |
| FBgn0003471 | 878.44  | 38  | 1 | LLDAEDVFVEHPDEK           | 112d | 18 |
| FBgn0003471 | 1412.04 | 36  | 1 | WDPSQGPNGNEYIDEYEYDGGNSSR | 112d | 18 |
| FBgn0003471 | 717.47  | 73  | 1 | WIETTIQSLGER              | 112d | 18 |
| FBgn0003471 | 991.16  | 39  | 1 | ALESEITSHDPQLQNVAK        | 122d | 18 |
| FBgn0003471 | 1215.55 | 49  | 1 | EVVAGSQELGQDFDHVTLLSER    | 122d | 18 |
| FBgn0003471 | 878.09  | 46  | 1 | LLDAEDVFVEHPDEK           | 122d | 18 |
| FBgn0003471 | 943.92  | 37  | 1 | TNAIHNLNNAFDVAEDK         | 122d | 18 |
| FBgn0003471 | 717.4   | 72  | 2 | WIETTIQSLGER              | 122d | 18 |

|             |         |    |   |                            |      |    |
|-------------|---------|----|---|----------------------------|------|----|
| FBgn0003471 | 991.03  | 57 | 3 | ALESEITSHDPQLQNVAK         | 132d | 18 |
| FBgn0003471 | 1215.78 | 65 | 1 | EVVAGSQELGQDFDHVTLLSER     | 132d | 18 |
| FBgn0003471 | 1093.74 | 76 | 2 | GEPSYDLQNA AIEIASDYTK      | 132d | 18 |
| FBgn0003471 | 879.04  | 41 | 1 | LLDAEDVFVEHPDEK            | 132d | 18 |
| FBgn0003471 | 943.97  | 48 | 2 | TNAIHNLNNAFDVAEDK          | 132d | 18 |
| FBgn0003471 | 1010.39 | 99 | 2 | TQTDVASEDTPTSLPEAEK        | 132d | 18 |
| FBgn0003471 | 582.84  | 76 | 2 | AQSDSTAVAASR               | 142d | 18 |
| FBgn0003471 | 1215.69 | 36 | 1 | EVVAGSQELGQDFDHVTLLSER     | 142d | 18 |
| FBgn0003471 | 878.07  | 57 | 1 | LLDAEDVFVEHPDEK            | 142d | 18 |
| FBgn0003471 | 716.88  | 85 | 1 | WIETTIQSLGER               | 142d | 18 |
| FBgn0003471 | 990.9   | 55 | 3 | ALESEITSHDPQLQNVAK         | 2d   | 28 |
| FBgn0003471 | 857.64  | 69 | 2 | DDTPVNLEQAENQLK            | 2d   | 28 |
| FBgn0003471 | 892.99  | 52 | 2 | DVSGVELLMNNHQSLK           | 2d   | 28 |
| FBgn0003471 | 1215.69 | 62 | 1 | EVVAGSQELGQDFDHVTLLSER     | 2d   | 28 |
| FBgn0003471 | 1093.07 | 57 | 1 | GEPSYDLQNA AIEIASDYTK      | 2d   | 28 |
| FBgn0003471 | 773.25  | 70 | 1 | GGTPGAGEGHEGYVTR           | 2d   | 28 |
| FBgn0003471 | 697.23  | 89 | 1 | KFEALISDLTQK               | 2d   | 28 |
| FBgn0003471 | 878.81  | 62 | 1 | LLDAEDVFVEHPDEK            | 2d   | 28 |
| FBgn0003471 | 983.89  | 59 | 1 | LVSQDNFGFDLAAVEAAAK        | 2d   | 28 |
| FBgn0003471 | 812.59  | 69 | 2 | NQSLATEIDNHEPR             | 2d   | 28 |
| FBgn0003471 | 637.2   | 61 | 3 | NYAEVIDALHK                | 2d   | 28 |
| FBgn0003471 | 894.46  | 55 | 2 | QTEVLLSQEHFLSK             | 2d   | 28 |
| FBgn0003471 | 943.99  | 96 | 3 | TNAIHNLNNAFDVAEDK          | 2d   | 28 |
| FBgn0003471 | 1010.66 | 82 | 2 | TQTDVASEDTPTSLPEAEK        | 2d   | 28 |
| FBgn0003471 | 794.71  | 49 | 3 | VGSELITEGHFGADR            | 2d   | 28 |
| FBgn0003471 | 1205.93 | 54 | 2 | VNGIADNLIQAGHSDSATIAEWK    | 2d   | 28 |
| FBgn0003471 | 1411.98 | 41 | 1 | WDPSQGPNGNEYIDEYEYDGGNSSSR | 2d   | 28 |
| FBgn0003471 | 717.26  | 73 | 3 | WIETTIQSLGER               | 2d   | 28 |
| FBgn0003471 | 990.79  | 65 | 3 | ALESEITSHDPQLQNVAK         | 12d  | 28 |
| FBgn0003471 | 1044.92 | 69 | 2 | DNLNESWQDLLELIETR          | 12d  | 28 |
| FBgn0003471 | 710.41  | 64 | 1 | EEIDNYTEDYK                | 12d  | 28 |
| FBgn0003471 | 1215.75 | 75 | 3 | EVVAGSQELGQDFDHVTLLSER     | 12d  | 28 |

|             |         |     |   |                       |     |    |
|-------------|---------|-----|---|-----------------------|-----|----|
| FBgn0003471 | 1093.58 | 35  | 1 | GEPSYDLQNA AIEIASDYTK | 12d | 28 |
| FBgn0003471 | 773.36  | 78  | 1 | GGTPGAGEGHEGYVTR      | 12d | 28 |
| FBgn0003471 | 1030.5  | 34  | 1 | IVSSEDVGRDEANVQSLK    | 12d | 28 |
| FBgn0003471 | 637.48  | 54  | 1 | NYAEVIDALHK           | 12d | 28 |
| FBgn0003471 | 943.74  | 69  | 1 | TNAIHNLNNAFDVAEDK     | 12d | 28 |
| FBgn0003471 | 1010.21 | 87  | 3 | TQTDVASEDTPTSLPEAEK   | 12d | 28 |
| FBgn0003471 | 793.82  | 51  | 3 | VGSELITEGHFGADR       | 12d | 28 |
| FBgn0003471 | 943.84  | 79  | 2 | TNAIHNLNNAFDVAEDK     | 22d | 28 |
| FBgn0003471 | 717.56  | 85  | 3 | WIETTIQSLGER          | 22d | 28 |
| FBgn0003471 | 637.29  | 53  | 1 | NYAEVIDALHK           | 32d | 28 |
| FBgn0003471 | 943.53  | 52  | 1 | TNAIHNLNNAFDVAEDK     | 32d | 28 |
| FBgn0003471 | 717.34  | 57  | 1 | WIETTIQSLGER          | 32d | 28 |
| FBgn0003471 | 710.44  | 61  | 2 | EEIDNYTEDYK           | 36d | 28 |
| FBgn0003471 | 697.23  | 45  | 1 | KFEALISDLTQK          | 36d | 28 |
| FBgn0003471 | 943.9   | 85  | 3 | TNAIHNLNNAFDVAEDK     | 36d | 28 |
| FBgn0003471 | 1010.28 | 79  | 2 | TQTDVASEDTPTSLPEAEK   | 36d | 28 |
| FBgn0003471 | 717.59  | 92  | 2 | WIETTIQSLGER          | 36d | 28 |
| FBgn0003471 | 710.22  | 56  | 1 | EEIDNYTEDYK           | 42d | 28 |
| FBgn0003471 | 697.36  | 94  | 2 | KFEALISDLTQK          | 42d | 28 |
| FBgn0003471 | 983.93  | 45  | 1 | LVSQDNFGFDLAAVEAAAK   | 42d | 28 |
| FBgn0003471 | 856.98  | 58  | 2 | MVHDYENFTSLLK         | 42d | 28 |
| FBgn0003471 | 943.88  | 104 | 3 | TNAIHNLNNAFDVAEDK     | 42d | 28 |
| FBgn0003471 | 1010.33 | 86  | 2 | TQTDVASEDTPTSLPEAEK   | 42d | 28 |
| FBgn0003471 | 717.37  | 78  | 2 | WIETTIQSLGER          | 42d | 28 |
| FBgn0003471 | 697.4   | 36  | 1 | KFEALISDLTQK          | 46d | 28 |
| FBgn0003471 | 983.86  | 45  | 1 | LVSQDNFGFDLAAVEAAAK   | 46d | 28 |
| FBgn0003471 | 943.8   | 99  | 3 | TNAIHNLNNAFDVAEDK     | 46d | 28 |
| FBgn0003471 | 717.62  | 78  | 2 | WIETTIQSLGER          | 46d | 28 |
| FBgn0003471 | 990.85  | 45  | 2 | ALESEITSHDPQLQNVAK    | 50d | 28 |
| FBgn0003471 | 710.43  | 48  | 2 | EEIDNYTEDYK           | 50d | 28 |
| FBgn0003471 | 753.82  | 67  | 2 | LMSEADGVEQWIK         | 50d | 28 |
| FBgn0003471 | 637.47  | 46  | 1 | NYAEVIDALHK           | 50d | 28 |

|             |         |     |   |                                       |      |    |
|-------------|---------|-----|---|---------------------------------------|------|----|
| FBgn0003471 | 943.76  | 102 | 2 | TNAIHNLNNAFDVAEDK                     | 50d  | 28 |
| FBgn0003471 | 1010.28 | 80  | 2 | TQTDVASEDTPTSLPEAEK                   | 50d  | 28 |
| FBgn0003471 | 794.63  | 59  | 3 | VGSELITEGHFGADR                       | 50d  | 28 |
| FBgn0003471 | 717.33  | 70  | 1 | WIETTIQSLGER                          | 50d  | 28 |
| FBgn0003471 | 990.94  | 53  | 1 | ALESEITSHDPQLQNVAK                    | 52d  | 28 |
| FBgn0003471 | 1215.47 | 53  | 1 | EVVAGSQELGQDFDHVTLLSER                | 52d  | 28 |
| FBgn0003471 | 1054.29 | 41  | 1 | HEAFLTTMEANDDKINTLLQVADTLVEK          | 52d  | 28 |
| FBgn0003471 | 637.01  | 41  | 1 | NYAEVIDALHK                           | 52d  | 28 |
| FBgn0003471 | 943.73  | 68  | 2 | TNAIHNLNNAFDVAEDK                     | 52d  | 28 |
| FBgn0003471 | 1010.62 | 74  | 1 | TQTDVASEDTPTSLPEAEK                   | 52d  | 28 |
| FBgn0003471 | 717.46  | 60  | 1 | WIETTIQSLGER                          | 52d  | 28 |
| FBgn0003471 | 582.55  | 68  | 1 | AQSDSTAVAASR                          | 56d  | 28 |
| FBgn0003471 | 1093.48 | 105 | 1 | GEPSYDLQNAAIEIASDYTK                  | 56d  | 28 |
| FBgn0003471 | 773.08  | 34  | 1 | GGTPGAGEGHEGYVTR                      | 56d  | 28 |
| FBgn0003471 | 879.14  | 86  | 3 | LLDAEDVFVEHPDEK                       | 56d  | 28 |
| FBgn0003471 | 753.85  | 61  | 1 | LMSEADGVEQWIK                         | 56d  | 28 |
| FBgn0003471 | 943.86  | 83  | 2 | TNAIHNLNNAFDVAEDK                     | 56d  | 28 |
| FBgn0003498 | 576.95  | 39  | 1 | YGEIESINVK                            | 2d   | 28 |
| FBgn0003517 | 1329.05 | 52  | 1 | IEEAVDHPVEETTNAWADEVAAETVGGVEDWNEDTVK | 2d   | 18 |
| FBgn0003517 | 1328.89 | 51  | 2 | IEEAVDHPVEETTNAWADEVAAETVGGVEDWNEDTVK | 42d  | 18 |
| FBgn0003517 | 1329.03 | 45  | 1 | IEEAVDHPVEETTNAWADEVAAETVGGVEDWNEDTVK | 122d | 18 |
| FBgn0003517 | 1329.08 | 54  | 1 | IEEAVDHPVEETTNAWADEVAAETVGGVEDWNEDTVK | 32d  | 28 |
| FBgn0003517 | 1329.08 | 53  | 1 | IEEAVDHPVEETTNAWADEVAAETVGGVEDWNEDTVK | 36d  | 28 |
| FBgn0003517 | 635.91  | 38  | 1 | RADGVNILNLGK                          | 36d  | 28 |
| FBgn0003517 | 1329.09 | 52  | 2 | IEEAVDHPVEETTNAWADEVAAETVGGVEDWNEDTVK | 46d  | 28 |
| FBgn0003721 | 889.71  | 97  | 4 | DIGDDLDTAFVELILK                      | 2d   | 18 |
| FBgn0003721 | 954.22  | 94  | 6 | DIGDDLDTAFVELILKE                     | 2d   | 18 |
| FBgn0003721 | 787.48  | 68  | 2 | EVDRLLEDDLVEK                         | 2d   | 18 |
| FBgn0003721 | 526.4   | 58  | 3 | FLAEEADKK                             | 2d   | 18 |
| FBgn0003721 | 630.03  | 56  | 2 | IQLLEEDLER                            | 2d   | 18 |
| FBgn0003721 | 1166.31 | 110 | 1 | IQTVENELDQTQEALTLVTGK                 | 2d   | 18 |
| FBgn0003721 | 565.68  | 63  | 3 | IVELEEEELR                            | 2d   | 18 |

|             |         |     |   |                        |      |    |
|-------------|---------|-----|---|------------------------|------|----|
| FBgn0003721 | 1230.04 | 107 | 3 | KIQTVENELDQTQEALTLVTGK | 2d   | 18 |
| FBgn0003721 | 697.47  | 75  | 1 | LSEASQAADER            | 2d   | 18 |
| FBgn0003721 | 1066.45 | 93  | 1 | TNMEDDKVALLENQLAQAK    | 2d   | 18 |
| FBgn0003721 | 743.73  | 82  | 4 | ALQNAESEVAALNR         | 22d  | 18 |
| FBgn0003721 | 787.58  | 68  | 3 | EVDRLEDDLVLK           | 22d  | 18 |
| FBgn0003721 | 629.83  | 54  | 2 | IQLLEEDLER             | 22d  | 18 |
| FBgn0003721 | 1166.04 | 86  | 2 | IQTVENELDQTQEALTLVTGK  | 22d  | 18 |
| FBgn0003721 | 1230.13 | 74  | 1 | KIQTVENELDQTQEALTLVTGK | 22d  | 18 |
| FBgn0003721 | 697.42  | 82  | 1 | LSEASQAADER            | 22d  | 18 |
| FBgn0003721 | 1066.42 | 76  | 1 | TNMEDDKVALLENQLAQAK    | 22d  | 18 |
| FBgn0003721 | 889.59  | 71  | 1 | DIGDDLDTAFVELILK       | 42d  | 18 |
| FBgn0003721 | 954.09  | 89  | 2 | DIGDDLDTAFVELILKE      | 42d  | 18 |
| FBgn0003721 | 787.41  | 62  | 1 | EVDRLEDDLVLK           | 42d  | 18 |
| FBgn0003721 | 630     | 38  | 1 | IQLLEEDLER             | 42d  | 18 |
| FBgn0003721 | 1166.08 | 113 | 4 | IQTVENELDQTQEALTLVTGK  | 42d  | 18 |
| FBgn0003721 | 565.74  | 54  | 1 | IVELEEELR              | 42d  | 18 |
| FBgn0003721 | 1229.97 | 100 | 1 | KIQTVENELDQTQEALTLVTGK | 42d  | 18 |
| FBgn0003721 | 697.38  | 86  | 3 | LSEASQAADER            | 42d  | 18 |
| FBgn0003721 | 954.04  | 46  | 1 | DIGDDLDTAFVELILKE      | 62d  | 18 |
| FBgn0003721 | 787.58  | 66  | 1 | EVDRLEDDLVLK           | 62d  | 18 |
| FBgn0003721 | 526.14  | 49  | 1 | FLAEEADKK              | 62d  | 18 |
| FBgn0003721 | 697.22  | 86  | 8 | LSEASQAADER            | 62d  | 18 |
| FBgn0003721 | 743.72  | 54  | 1 | ALQNAESEVAALNR         | 82d  | 18 |
| FBgn0003721 | 889.54  | 79  | 2 | DIGDDLDTAFVELILK       | 82d  | 18 |
| FBgn0003721 | 787.38  | 66  | 2 | EVDRLEDDLVLK           | 82d  | 18 |
| FBgn0003721 | 526.02  | 68  | 1 | FLAEEADKK              | 82d  | 18 |
| FBgn0003721 | 630.02  | 53  | 3 | IQLLEEDLER             | 82d  | 18 |
| FBgn0003721 | 1165.37 | 83  | 1 | IQTVENELDQTQEALTLVTGK  | 82d  | 18 |
| FBgn0003721 | 565.71  | 64  | 1 | IVELEEELR              | 82d  | 18 |
| FBgn0003721 | 697.11  | 66  | 4 | LSEASQAADER            | 82d  | 18 |
| FBgn0003721 | 787.23  | 57  | 1 | EVDRLEDDLVLK           | 102d | 18 |
| FBgn0003721 | 630.02  | 39  | 1 | IQLLEEDLER             | 102d | 18 |



|             |         |     |   |                        |      |    |
|-------------|---------|-----|---|------------------------|------|----|
| FBgn0003721 | 1166.21 | 144 | 4 | IQTVENELDQTQEALTLVTGK  | 102d | 18 |
| FBgn0003721 | 697.56  | 92  | 2 | LSEASQAADER            | 102d | 18 |
| FBgn0003721 | 953.9   | 39  | 1 | DIGDDLDTAFVELILKE      | 112d | 18 |
| FBgn0003721 | 787.58  | 52  | 2 | EVDREDDLVLEK           | 112d | 18 |
| FBgn0003721 | 629.94  | 48  | 1 | IQLLEEDLER             | 112d | 18 |
| FBgn0003721 | 1166.19 | 108 | 3 | IQTVENELDQTQEALTLVTGK  | 112d | 18 |
| FBgn0003721 | 1230.07 | 35  | 1 | KIQTVENELDQTQEALTLVTGK | 112d | 18 |
| FBgn0003721 | 697.29  | 39  | 1 | LSEASQAADER            | 112d | 18 |
| FBgn0003721 | 787.54  | 48  | 1 | EVDREDDLVLEK           | 122d | 18 |
| FBgn0003721 | 629.74  | 39  | 2 | IQLLEEDLER             | 122d | 18 |
| FBgn0003721 | 1166.09 | 77  | 3 | IQTVENELDQTQEALTLVTGK  | 122d | 18 |
| FBgn0003721 | 1230.36 | 65  | 2 | KIQTVENELDQTQEALTLVTGK | 122d | 18 |
| FBgn0003721 | 697.53  | 65  | 2 | LSEASQAADER            | 122d | 18 |
| FBgn0003721 | 743.88  | 52  | 1 | ALQNAESEVAALNR         | 132d | 18 |
| FBgn0003721 | 697.43  | 85  | 1 | LSEASQAADER            | 132d | 18 |
| FBgn0003721 | 743.97  | 77  | 2 | ALQNAESEVAALNR         | 142d | 18 |
| FBgn0003721 | 787.62  | 46  | 1 | EVDREDDLVLEK           | 142d | 18 |
| FBgn0003721 | 629.86  | 40  | 1 | IQLLEEDLER             | 142d | 18 |
| FBgn0003721 | 1166.14 | 100 | 4 | IQTVENELDQTQEALTLVTGK  | 142d | 18 |
| FBgn0003721 | 1230.39 | 90  | 1 | KIQTVENELDQTQEALTLVTGK | 142d | 18 |
| FBgn0003721 | 697.56  | 66  | 1 | LSEASQAADER            | 142d | 18 |
| FBgn0003721 | 1066.42 | 64  | 2 | TNMEDDKVALLENQLAQAK    | 142d | 18 |
| FBgn0003721 | 889.64  | 97  | 1 | DIGDDLDTAFVELILK       | 2d   | 28 |
| FBgn0003721 | 954.16  | 67  | 1 | DIGDDLDTAFVELILKE      | 2d   | 28 |
| FBgn0003721 | 793.72  | 45  | 1 | EVDREDDLLNVR           | 2d   | 28 |
| FBgn0003721 | 787.61  | 56  | 3 | EVDREDDLVLEK           | 2d   | 28 |
| FBgn0003721 | 526.28  | 57  | 3 | FLAEEADKK              | 2d   | 28 |
| FBgn0003721 | 629.76  | 59  | 6 | IQLLEEDLER             | 2d   | 28 |
| FBgn0003721 | 1165.97 | 82  | 3 | IQTVENELDQTQEALTLVTGK  | 2d   | 28 |
| FBgn0003721 | 565.59  | 62  | 1 | IVELEEELR              | 2d   | 28 |
| FBgn0003721 | 697.27  | 89  | 4 | LSEASQAADER            | 2d   | 28 |
| FBgn0003721 | 531.92  | 45  | 1 | MDALENQLK              | 2d   | 28 |

|             |         |     |   |                        |     |    |
|-------------|---------|-----|---|------------------------|-----|----|
| FBgn0003721 | 743.94  | 90  | 3 | ALQNAESEVAALNR         | 12d | 28 |
| FBgn0003721 | 889.59  | 75  | 1 | DIGDDLDTAFVELILK       | 12d | 28 |
| FBgn0003721 | 953.77  | 78  | 4 | DIGDDLDTAFVELILKE      | 12d | 28 |
| FBgn0003721 | 787.3   | 66  | 3 | EVDREDDLVLEK           | 12d | 28 |
| FBgn0003721 | 629.69  | 59  | 3 | IQLLEEDLER             | 12d | 28 |
| FBgn0003721 | 1166.25 | 130 | 3 | IQTVENELDQTQEALTLVTGK  | 12d | 28 |
| FBgn0003721 | 565.87  | 58  | 1 | IVELEEELR              | 12d | 28 |
| FBgn0003721 | 1229.98 | 73  | 2 | KIQTVENELDQTQEALTLVTGK | 12d | 28 |
| FBgn0003721 | 697.03  | 91  | 1 | LSEASQAADER            | 12d | 28 |
| FBgn0003721 | 1066.53 | 82  | 1 | TNMEDDKVALLENQLAQAK    | 12d | 28 |
| FBgn0003721 | 1099.74 | 57  | 2 | YKDIGDDLDTAFVELILKE    | 12d | 28 |
| FBgn0003721 | 743.96  | 86  | 5 | ALQNAESEVAALNR         | 22d | 28 |
| FBgn0003721 | 787.46  | 47  | 1 | EVDREDDLVLEK           | 22d | 28 |
| FBgn0003721 | 1166.12 | 96  | 3 | IQTVENELDQTQEALTLVTGK  | 22d | 28 |
| FBgn0003721 | 1066.46 | 68  | 1 | TNMEDDKVALLENQLAQAK    | 22d | 28 |
| FBgn0003721 | 743.64  | 65  | 1 | ALQNAESEVAALNR         | 32d | 28 |
| FBgn0003721 | 787.36  | 56  | 3 | EVDREDDLVLEK           | 32d | 28 |
| FBgn0003721 | 629.68  | 61  | 6 | IQLLEEDLER             | 32d | 28 |
| FBgn0003721 | 777.9   | 96  | 3 | IQTVENELDQTQEALTLVTGK  | 32d | 28 |
| FBgn0003721 | 565.81  | 62  | 3 | IVELEEELR              | 32d | 28 |
| FBgn0003721 | 743.77  | 59  | 2 | ALQNAESEVAALNR         | 36d | 28 |
| FBgn0003721 | 787.16  | 66  | 3 | EVDREDDLVLEK           | 36d | 28 |
| FBgn0003721 | 629.89  | 61  | 4 | IQLLEEDLER             | 36d | 28 |
| FBgn0003721 | 1166.07 | 105 | 3 | IQTVENELDQTQEALTLVTGK  | 36d | 28 |
| FBgn0003721 | 565.62  | 57  | 2 | IVELEEELR              | 36d | 28 |
| FBgn0003721 | 1230.19 | 43  | 1 | KIQTVENELDQTQEALTLVTGK | 36d | 28 |
| FBgn0003721 | 697.28  | 94  | 3 | LSEASQAADER            | 36d | 28 |
| FBgn0003721 | 787.53  | 56  | 2 | EVDREDDLVLEK           | 42d | 28 |
| FBgn0003721 | 526.41  | 56  | 1 | FLAEEADKK              | 42d | 28 |
| FBgn0003721 | 629.75  | 61  | 4 | IQLLEEDLER             | 42d | 28 |
| FBgn0003721 | 1166.21 | 110 | 1 | IQTVENELDQTQEALTLVTGK  | 42d | 28 |
| FBgn0003721 | 565.82  | 51  | 2 | IVELEEELR              | 42d | 28 |

|             |         |     |   |                                 |     |    |
|-------------|---------|-----|---|---------------------------------|-----|----|
| FBgn0003721 | 1230.03 | 66  | 2 | KIQTVENELDQTQEALTLVTGK          | 42d | 28 |
| FBgn0003721 | 697.31  | 92  | 2 | LSEASQAADER                     | 42d | 28 |
| FBgn0003721 | 531.51  | 51  | 1 | MDALENQLK                       | 42d | 28 |
| FBgn0003721 | 711.47  | 49  | 1 | TNMEDDKVALLENQLAQAK             | 42d | 28 |
| FBgn0003721 | 787.27  | 59  | 3 | EVDREDDLVLEK                    | 46d | 28 |
| FBgn0003721 | 629.94  | 53  | 3 | IQLLEEDLER                      | 46d | 28 |
| FBgn0003721 | 565.71  | 62  | 2 | IVELEEELR                       | 46d | 28 |
| FBgn0003721 | 743.93  | 78  | 1 | ALQNAESEVAALNR                  | 50d | 28 |
| FBgn0003721 | 787.45  | 42  | 1 | EVDREDDLVLEK                    | 50d | 28 |
| FBgn0003721 | 630.01  | 55  | 1 | IQLLEEDLER                      | 50d | 28 |
| FBgn0003721 | 777.83  | 56  | 2 | IQTVENELDQTQEALTLVTGK           | 50d | 28 |
| FBgn0003721 | 566.03  | 62  | 1 | IVELEEELR                       | 50d | 28 |
| FBgn0003721 | 820.24  | 49  | 1 | KIQTVENELDQTQEALTLVTGK          | 50d | 28 |
| FBgn0003721 | 574.32  | 46  | 1 | LAMVEADLER                      | 50d | 28 |
| FBgn0003721 | 697.16  | 82  | 2 | LSEASQAADER                     | 50d | 28 |
| FBgn0003721 | 787.44  | 52  | 2 | EVDREDDLVLEK                    | 52d | 28 |
| FBgn0003721 | 629.91  | 53  | 2 | IQLLEEDLER                      | 52d | 28 |
| FBgn0003721 | 1166.26 | 73  | 3 | IQTVENELDQTQEALTLVTGK           | 52d | 28 |
| FBgn0003721 | 697.37  | 82  | 2 | LSEASQAADER                     | 52d | 28 |
| FBgn0003721 | 526.47  | 38  | 1 | FLAEEADKK                       | 56d | 28 |
| FBgn0003721 | 629.94  | 56  | 1 | IQLLEEDLER                      | 56d | 28 |
| FBgn0003721 | 1166.23 | 123 | 3 | IQTVENELDQTQEALTLVTGK           | 56d | 28 |
| FBgn0003738 | 682.9   | 77  | 2 | AIFGESDALIAEK                   | 2d  | 18 |
| FBgn0003738 | 784.96  | 95  | 3 | DIGADWVILGHSER                  | 2d  | 18 |
| FBgn0003738 | 661.77  | 55  | 1 | GAFTGEISPAMLK                   | 2d  | 18 |
| FBgn0003738 | 1336.66 | 72  | 3 | KPDIDGFLVGGASLKPEFVDIINAR       | 2d  | 18 |
| FBgn0003738 | 881.57  | 64  | 1 | NLLPCELGLAQONAYK                | 22d | 18 |
| FBgn0003738 | 784.93  | 94  | 1 | DIGADWVILGHSER                  | 42d | 18 |
| FBgn0003738 | 520.05  | 44  | 1 | AEHALAEGLK                      | 62d | 18 |
| FBgn0003738 | 784.77  | 94  | 2 | DIGADWVILGHSER                  | 62d | 18 |
| FBgn0003738 | 1123.69 | 55  | 1 | NVVVAYEPVWAIGTGKTATPDQAQEVHAFLR | 62d | 18 |
| FBgn0003738 | 682.8   | 70  | 1 | AIFGESDALIAEK                   | 82d | 18 |

|             |         |    |   |                                 |      |    |
|-------------|---------|----|---|---------------------------------|------|----|
| FBgn0003738 | 1123.75 | 36 | 1 | NVVVAYEPVWAIGTGKTATPDQAQEVHAFLR | 82d  | 18 |
| FBgn0003738 | 682.64  | 79 | 2 | AIFGESDALIAEK                   | 102d | 18 |
| FBgn0003738 | 1336.75 | 49 | 1 | KPDIDGFLVGGASLKPEFVDIINAR       | 102d | 18 |
| FBgn0003738 | 1123.7  | 52 | 1 | NVVVAYEPVWAIGTGKTATPDQAQEVHAFLR | 112d | 18 |
| FBgn0003738 | 682.83  | 86 | 2 | AIFGESDALIAEK                   | 122d | 18 |
| FBgn0003738 | 661.52  | 60 | 3 | GAFTGEISPAMLK                   | 122d | 18 |
| FBgn0003738 | 891.49  | 58 | 1 | KPDIDGFLVGGASLKPEFVDIINAR       | 132d | 18 |
| FBgn0003738 | 661.71  | 55 | 2 | GAFTGEISPAMLK                   | 142d | 18 |
| FBgn0003738 | 891.56  | 51 | 1 | KPDIDGFLVGGASLKPEFVDIINAR       | 142d | 18 |
| FBgn0003738 | 784.78  | 88 | 3 | DIGADWVILGHSER                  | 2d   | 28 |
| FBgn0003738 | 661.81  | 69 | 2 | GAFTGEISPAMLK                   | 2d   | 28 |
| FBgn0003738 | 640.73  | 69 | 6 | IQYGGSVTAANAK                   | 2d   | 28 |
| FBgn0003738 | 1336.82 | 34 | 1 | KPDIDGFLVGGASLKPEFVDIINAR       | 2d   | 28 |
| FBgn0003738 | 881.51  | 58 | 1 | NLLPCELGLAGQNAYK                | 2d   | 28 |
| FBgn0003738 | 682.88  | 78 | 1 | AIFGESDALIAEK                   | 12d  | 28 |
| FBgn0003738 | 784.72  | 50 | 1 | DIGADWVILGHSER                  | 12d  | 28 |
| FBgn0003738 | 1336.93 | 58 | 1 | KPDIDGFLVGGASLKPEFVDIINAR       | 12d  | 28 |
| FBgn0003738 | 1684.92 | 51 | 2 | NVVVAYEPVWAIGTGKTATPDQAQEVHAFLR | 12d  | 28 |
| FBgn0003738 | 682.89  | 39 | 1 | AIFGESDALIAEK                   | 36d  | 28 |
| FBgn0003738 | 661.62  | 56 | 1 | GAFTGEISPAMLK                   | 36d  | 28 |
| FBgn0003738 | 682.67  | 72 | 1 | AIFGESDALIAEK                   | 42d  | 28 |
| FBgn0003738 | 891.64  | 47 | 1 | KPDIDGFLVGGASLKPEFVDIINAR       | 42d  | 28 |
| FBgn0003738 | 394.97  | 40 | 1 | TNEVVAR                         | 42d  | 28 |
| FBgn0003738 | 1123.7  | 68 | 1 | NVVVAYEPVWAIGTGKTATPDQAQEVHAFLR | 46d  | 28 |
| FBgn0003738 | 784.98  | 55 | 1 | DIGADWVILGHSER                  | 50d  | 28 |
| FBgn0003738 | 661.7   | 47 | 1 | GAFTGEISPAMLK                   | 50d  | 28 |
| FBgn0003738 | 1685.11 | 36 | 1 | NVVVAYEPVWAIGTGKTATPDQAQEVHAFLR | 52d  | 28 |
| FBgn0003738 | 1336.63 | 54 | 2 | KPDIDGFLVGGASLKPEFVDIINAR       | 56d  | 28 |
| FBgn0003748 | 852.09  | 71 | 2 | ENPSFLDLISDPDLK                 | 102d | 18 |
| FBgn0003748 | 852.4   | 55 | 1 | ENPSFLDLISDPDLK                 | 132d | 18 |
| FBgn0003748 | 852.44  | 72 | 1 | ENPSFLDLISDPDLK                 | 2d   | 28 |
| FBgn0003861 | 545.86  | 87 | 1 | VGQSSAAAGGER                    | 42d  | 18 |

|             |         |    |   |                       |     |    |
|-------------|---------|----|---|-----------------------|-----|----|
| FBgn0003861 | 520.05  | 34 | 1 | NFILSCER              | 62d | 18 |
| FBgn0003861 | 545.77  | 49 | 1 | VGQSSAAAGGER          | 42d | 28 |
| FBgn0003884 | 1166.07 | 64 | 5 | AFVHWYVVGEGMEEGEFSEAR | 2d  | 18 |
| FBgn0003884 | 563.78  | 42 | 2 | AVFVDLEPTVVDEV        | 2d  | 18 |
| FBgn0003884 | 508.96  | 37 | 1 | DVNAAIATIK            | 2d  | 18 |
| FBgn0003884 | 1205.79 | 58 | 3 | FDGALNVDLTEFQTNLVPYPR | 2d  | 18 |
| FBgn0003884 | 444.86  | 36 | 1 | FDLMYAK               | 2d  | 18 |
| FBgn0003884 | 893.67  | 57 | 2 | IHFPLVTYAPVISA EK     | 2d  | 18 |
| FBgn0003884 | 860.48  | 41 | 3 | NLDIERPTYTNLNR        | 2d  | 18 |
| FBgn0003884 | 800.63  | 54 | 3 | TIQFVDWCPTGFK         | 2d  | 18 |
| FBgn0003884 | 998.04  | 83 | 3 | TVGGGDDSFNTFFSETGAGK  | 2d  | 18 |
| FBgn0003884 | 913.55  | 52 | 2 | VGINYQPPTVVPGGDLAK    | 2d  | 18 |
| FBgn0003884 | 893.73  | 62 | 2 | IHFPLVTYAPVISA EK     | 22d | 18 |
| FBgn0003884 | 729.83  | 65 | 1 | LIGQIVSSITASLR        | 22d | 18 |
| FBgn0003884 | 860.44  | 41 | 3 | NLDIERPTYTNLNR        | 22d | 18 |
| FBgn0003884 | 471.14  | 59 | 2 | QLFHPEQLITGK          | 22d | 18 |
| FBgn0003884 | 800.36  | 58 | 4 | TIQFVDWCPTGFK         | 22d | 18 |
| FBgn0003884 | 913.56  | 60 | 3 | VGINYQPPTVVPGGDLAK    | 22d | 18 |
| FBgn0003884 | 563.56  | 78 | 3 | AVFVDLEPTVVDEV        | 42d | 18 |
| FBgn0003884 | 512.69  | 41 | 2 | EDAANNYAR             | 42d | 18 |
| FBgn0003884 | 536.79  | 75 | 5 | EIVDLVLDR             | 42d | 18 |
| FBgn0003884 | 1205.61 | 84 | 3 | FDGALNVDLTEFQTNLVPYPR | 42d | 18 |
| FBgn0003884 | 893.43  | 49 | 2 | IHFPLVTYAPVISA EK     | 42d | 18 |
| FBgn0003884 | 729.89  | 66 | 2 | LIGQIVSSITASLR        | 42d | 18 |
| FBgn0003884 | 574.11  | 46 | 3 | NLDIERPTYTNLNR        | 42d | 18 |
| FBgn0003884 | 706.5   | 51 | 2 | QLFHPEQLITGK          | 42d | 18 |
| FBgn0003884 | 800.41  | 68 | 5 | TIQFVDWCPTGFK         | 42d | 18 |
| FBgn0003884 | 997.87  | 94 | 3 | TVGGGDDSFNTFFSETGAGK  | 42d | 18 |
| FBgn0003884 | 913.62  | 45 | 1 | VGINYQPPTVVPGGDLAK    | 42d | 18 |
| FBgn0003884 | 844.86  | 62 | 2 | AVFVDLEPTVVDEV        | 62d | 18 |
| FBgn0003884 | 445.24  | 54 | 1 | EDLAALEK              | 62d | 18 |
| FBgn0003884 | 536.93  | 58 | 2 | EIVDLVLDR             | 62d | 18 |

|             |         |     |   |                       |      |    |
|-------------|---------|-----|---|-----------------------|------|----|
| FBgn0003884 | 1205.79 | 69  | 1 | FDGALNVDLTEFQTNLVPYPR | 62d  | 18 |
| FBgn0003884 | 893.68  | 54  | 2 | IHFPLVTYAPVISA EK     | 62d  | 18 |
| FBgn0003884 | 730.06  | 61  | 1 | LIGQIVSSITASLR        | 62d  | 18 |
| FBgn0003884 | 860.38  | 47  | 1 | NLDIERPTYTNLNR        | 62d  | 18 |
| FBgn0003884 | 800.58  | 63  | 2 | TIQFVDWCPTGFK         | 62d  | 18 |
| FBgn0003884 | 997.92  | 99  | 1 | TVGGGDDSFNTFFSETGAGK  | 62d  | 18 |
| FBgn0003884 | 913.67  | 50  | 1 | VGINYQPPTVVPGGDLAK    | 62d  | 18 |
| FBgn0003884 | 844.98  | 46  | 2 | AVFVDLEPTVVDEV R      | 82d  | 18 |
| FBgn0003884 | 445.3   | 37  | 2 | EDLA ALEK             | 82d  | 18 |
| FBgn0003884 | 537.02  | 61  | 3 | EIVDLVLDR             | 82d  | 18 |
| FBgn0003884 | 595.88  | 50  | 3 | IHFPLVTYAPVISA EK     | 82d  | 18 |
| FBgn0003884 | 860.23  | 44  | 2 | NLDIERPTYTNLNR        | 82d  | 18 |
| FBgn0003884 | 706.39  | 45  | 1 | QLFHPEQLITGK          | 82d  | 18 |
| FBgn0003884 | 998.03  | 101 | 2 | TVGGGDDSFNTFFSETGAGK  | 82d  | 18 |
| FBgn0003884 | 913.43  | 65  | 1 | VGINYQPPTVVPGGDLAK    | 82d  | 18 |
| FBgn0003884 | 536.55  | 80  | 2 | EIVDLVLDR             | 102d | 18 |
| FBgn0003884 | 1205.53 | 91  | 3 | FDGALNVDLTEFQTNLVPYPR | 102d | 18 |
| FBgn0003884 | 596     | 41  | 1 | IHFPLVTYAPVISA EK     | 102d | 18 |
| FBgn0003884 | 800.16  | 50  | 3 | TIQFVDWCPTGFK         | 102d | 18 |
| FBgn0003884 | 998.1   | 103 | 1 | TVGGGDDSFNTFFSETGAGK  | 102d | 18 |
| FBgn0003884 | 913.49  | 67  | 3 | VGINYQPPTVVPGGDLAK    | 102d | 18 |
| FBgn0003884 | 844.81  | 35  | 1 | AVFVDLEPTVVDEV R      | 112d | 18 |
| FBgn0003884 | 1205.53 | 58  | 1 | FDGALNVDLTEFQTNLVPYPR | 112d | 18 |
| FBgn0003884 | 893.6   | 50  | 3 | IHFPLVTYAPVISA EK     | 112d | 18 |
| FBgn0003884 | 706.55  | 42  | 1 | QLFHPEQLITGK          | 112d | 18 |
| FBgn0003884 | 800.52  | 62  | 2 | TIQFVDWCPTGFK         | 112d | 18 |
| FBgn0003884 | 998.1   | 68  | 1 | TVGGGDDSFNTFFSETGAGK  | 112d | 18 |
| FBgn0003884 | 913.54  | 47  | 3 | VGINYQPPTVVPGGDLAK    | 112d | 18 |
| FBgn0003884 | 844.57  | 55  | 1 | AVFVDLEPTVVDEV R      | 122d | 18 |
| FBgn0003884 | 512.82  | 50  | 2 | EDAANNYAR             | 122d | 18 |
| FBgn0003884 | 1205.82 | 72  | 1 | FDGALNVDLTEFQTNLVPYPR | 122d | 18 |
| FBgn0003884 | 444.85  | 38  | 1 | FDLMYAK               | 122d | 18 |

|             |         |     |   |                       |      |    |
|-------------|---------|-----|---|-----------------------|------|----|
| FBgn0003884 | 893.49  | 51  | 2 | IHFPLVTYAPVISA EK     | 122d | 18 |
| FBgn0003884 | 800.4   | 47  | 3 | TIQFVDWCPTGFK         | 122d | 18 |
| FBgn0003884 | 998.07  | 71  | 2 | TVGGGDDSFNTFFSETGAGK  | 122d | 18 |
| FBgn0003884 | 913.6   | 52  | 1 | VGINYQPPTVVPGGDLAK    | 122d | 18 |
| FBgn0003884 | 845.01  | 51  | 1 | AVFVDLEPTVVDEV R      | 132d | 18 |
| FBgn0003884 | 512.79  | 56  | 1 | EDAANNYAR             | 132d | 18 |
| FBgn0003884 | 1205.85 | 58  | 1 | FDGALNVDLTEFQTNLVPYPR | 132d | 18 |
| FBgn0003884 | 893.43  | 44  | 1 | IHFPLVTYAPVISA EK     | 132d | 18 |
| FBgn0003884 | 860.48  | 43  | 1 | NLDIERPTYTNLNR        | 132d | 18 |
| FBgn0003884 | 706.19  | 34  | 2 | QLFHPEQLITGK          | 132d | 18 |
| FBgn0003884 | 800.36  | 68  | 5 | TIQFVDWCPTGFK         | 132d | 18 |
| FBgn0003884 | 998.15  | 57  | 1 | TVGGGDDSFNTFFSETGAGK  | 132d | 18 |
| FBgn0003884 | 913.31  | 43  | 3 | VGINYQPPTVVPGGDLAK    | 132d | 18 |
| FBgn0003884 | 777.78  | 60  | 1 | AFVHWYV GEGMEEGEFSEAR | 142d | 18 |
| FBgn0003884 | 844.66  | 34  | 1 | AVFVDLEPTVVDEV R      | 142d | 18 |
| FBgn0003884 | 893.69  | 52  | 2 | IHFPLVTYAPVISA EK     | 142d | 18 |
| FBgn0003884 | 706.14  | 38  | 2 | QLFHPEQLITGK          | 142d | 18 |
| FBgn0003884 | 800.13  | 57  | 2 | TIQFVDWCPTGFK         | 142d | 18 |
| FBgn0003884 | 997.97  | 90  | 1 | TVGGGDDSFNTFFSETGAGK  | 142d | 18 |
| FBgn0003884 | 913.54  | 63  | 3 | VGINYQPPTVVPGGDLAK    | 142d | 18 |
| FBgn0003884 | 844.93  | 65  | 2 | AVFVDLEPTVVDEV R      | 2d   | 28 |
| FBgn0003884 | 508.55  | 58  | 2 | DVNAAIATIK            | 2d   | 28 |
| FBgn0003884 | 512.47  | 64  | 2 | EDAANNYAR             | 2d   | 28 |
| FBgn0003884 | 536.89  | 69  | 4 | EIVDLVLDR             | 2d   | 28 |
| FBgn0003884 | 1205.43 | 51  | 1 | FDGALNVDLTEFQTNLVPYPR | 2d   | 28 |
| FBgn0003884 | 893.31  | 67  | 3 | IHFPLVTYAPVISA EK     | 2d   | 28 |
| FBgn0003884 | 729.91  | 59  | 1 | LIGQIVSSITASLR        | 2d   | 28 |
| FBgn0003884 | 860.32  | 47  | 3 | NLDIERPTYTNLNR        | 2d   | 28 |
| FBgn0003884 | 800.51  | 61  | 3 | TIQFVDWCPTGFK         | 2d   | 28 |
| FBgn0003884 | 998.03  | 102 | 3 | TVGGGDDSFNTFFSETGAGK  | 2d   | 28 |
| FBgn0003884 | 913.46  | 65  | 2 | VGINYQPPTVVPGGDLAK    | 2d   | 28 |
| FBgn0003884 | 1165.9  | 61  | 5 | AFVHWYV GEGMEEGEFSEAR | 12d  | 28 |

|             |         |    |   |                       |     |    |
|-------------|---------|----|---|-----------------------|-----|----|
| FBgn0003884 | 844.85  | 50 | 2 | AVFVDLEPTVVDEV        | 12d | 28 |
| FBgn0003884 | 536.75  | 63 | 4 | EIVDLVLDR             | 12d | 28 |
| FBgn0003884 | 1205.54 | 78 | 2 | FDGALNVDLTEFQTNLVPYPR | 12d | 28 |
| FBgn0003884 | 444.46  | 35 | 1 | FDLMYAK               | 12d | 28 |
| FBgn0003884 | 893.67  | 71 | 3 | IHFPLVTYAPVISA EK     | 12d | 28 |
| FBgn0003884 | 860.29  | 40 | 2 | NLDIERPTYTNLNR        | 12d | 28 |
| FBgn0003884 | 706.46  | 50 | 2 | QLFHPEQLITGK          | 12d | 28 |
| FBgn0003884 | 800.31  | 48 | 1 | TIQFVDWCPTGFK         | 12d | 28 |
| FBgn0003884 | 998     | 83 | 1 | TVGGGDDSFNTFFSETGAGK  | 12d | 28 |
| FBgn0003884 | 893.63  | 59 | 3 | IHFPLVTYAPVISA EK     | 22d | 28 |
| FBgn0003884 | 730.1   | 83 | 3 | LIGQIVSSITASLR        | 22d | 28 |
| FBgn0003884 | 860.43  | 57 | 2 | NLDIERPTYTNLNR        | 22d | 28 |
| FBgn0003884 | 706.31  | 50 | 1 | QLFHPEQLITGK          | 22d | 28 |
| FBgn0003884 | 913.47  | 51 | 1 | VGINYQPPTVVPGGDLAK    | 22d | 28 |
| FBgn0003884 | 777.7   | 34 | 1 | AFVHWYVGEEMEEGFSEAR   | 32d | 28 |
| FBgn0003884 | 844.88  | 39 | 1 | AVFVDLEPTVVDEV        | 32d | 28 |
| FBgn0003884 | 536.75  | 50 | 1 | EIVDLVLDR             | 32d | 28 |
| FBgn0003884 | 893.62  | 63 | 2 | IHFPLVTYAPVISA EK     | 32d | 28 |
| FBgn0003884 | 860.33  | 36 | 2 | NLDIERPTYTNLNR        | 32d | 28 |
| FBgn0003884 | 706.48  | 46 | 1 | QLFHPEQLITGK          | 32d | 28 |
| FBgn0003884 | 800.63  | 66 | 3 | TIQFVDWCPTGFK         | 32d | 28 |
| FBgn0003884 | 913.49  | 42 | 3 | VGINYQPPTVVPGGDLAK    | 32d | 28 |
| FBgn0003884 | 844.93  | 43 | 1 | AVFVDLEPTVVDEV        | 36d | 28 |
| FBgn0003884 | 512.67  | 51 | 1 | EDAANNYAR             | 36d | 28 |
| FBgn0003884 | 1205.51 | 71 | 3 | FDGALNVDLTEFQTNLVPYPR | 36d | 28 |
| FBgn0003884 | 595.98  | 49 | 3 | IHFPLVTYAPVISA EK     | 36d | 28 |
| FBgn0003884 | 574.12  | 42 | 2 | NLDIERPTYTNLNR        | 36d | 28 |
| FBgn0003884 | 706.31  | 53 | 1 | QLFHPEQLITGK          | 36d | 28 |
| FBgn0003884 | 997.98  | 87 | 1 | TVGGGDDSFNTFFSETGAGK  | 36d | 28 |
| FBgn0003884 | 913.51  | 59 | 3 | VGINYQPPTVVPGGDLAK    | 36d | 28 |
| FBgn0003884 | 844.9   | 44 | 2 | AVFVDLEPTVVDEV        | 42d | 28 |
| FBgn0003884 | 512.63  | 51 | 2 | EDAANNYAR             | 42d | 28 |



|             |         |     |   |                          |     |    |
|-------------|---------|-----|---|--------------------------|-----|----|
| FBgn0003884 | 444.86  | 38  | 1 | EDLAALEK                 | 42d | 28 |
| FBgn0003884 | 1205.55 | 73  | 3 | FDGALNVDLTEFQTNLVPYPR    | 42d | 28 |
| FBgn0003884 | 893.69  | 60  | 3 | IHFPLVTYAPVISA EK        | 42d | 28 |
| FBgn0003884 | 860.31  | 47  | 2 | NLDIERPTYTNLNR           | 42d | 28 |
| FBgn0003884 | 706.36  | 46  | 2 | QLFHPEQLITGK             | 42d | 28 |
| FBgn0003884 | 800.55  | 54  | 3 | TIQFVDWCPTGFK            | 42d | 28 |
| FBgn0003884 | 997.88  | 81  | 3 | TVGGGDDSFNTFFSETGAGK     | 42d | 28 |
| FBgn0003884 | 913.63  | 44  | 2 | VGINYQPPTVVPGGDLAK       | 42d | 28 |
| FBgn0003884 | 844.96  | 41  | 1 | AVFVDLEPTVVDEV R         | 46d | 28 |
| FBgn0003884 | 1205.67 | 50  | 2 | FDGALNVDLTEFQTNLVPYPR    | 46d | 28 |
| FBgn0003884 | 893.31  | 57  | 3 | IHFPLVTYAPVISA EK        | 46d | 28 |
| FBgn0003884 | 860.41  | 50  | 2 | NLDIERPTYTNLNR           | 46d | 28 |
| FBgn0003884 | 706.28  | 37  | 1 | QLFHPEQLITGK             | 46d | 28 |
| FBgn0003884 | 800.39  | 51  | 2 | TIQFVDWCPTGFK            | 46d | 28 |
| FBgn0003884 | 997.98  | 119 | 3 | TVGGGDDSFNTFFSETGAGK     | 46d | 28 |
| FBgn0003884 | 913.54  | 49  | 1 | VGINYQPPTVVPGGDLAK       | 46d | 28 |
| FBgn0003884 | 1165.96 | 42  | 1 | AFVHWYVVGEGMEEGEFSEAR    | 50d | 28 |
| FBgn0003884 | 508.9   | 56  | 1 | DVNAAIATIK               | 50d | 28 |
| FBgn0003884 | 536.75  | 64  | 2 | EIVDLVLDR                | 50d | 28 |
| FBgn0003884 | 1205.82 | 81  | 3 | FDGALNVDLTEFQTNLVPYPR    | 50d | 28 |
| FBgn0003884 | 893.3   | 51  | 3 | IHFPLVTYAPVISA EK        | 50d | 28 |
| FBgn0003884 | 860.58  | 41  | 2 | NLDIERPTYTNLNR           | 50d | 28 |
| FBgn0003884 | 706.61  | 45  | 2 | QLFHPEQLITGK             | 50d | 28 |
| FBgn0003884 | 800.63  | 53  | 1 | TIQFVDWCPTGFK            | 50d | 28 |
| FBgn0003884 | 998.16  | 108 | 3 | TVGGGDDSFNTFFSETGAGK     | 50d | 28 |
| FBgn0003884 | 913.53  | 54  | 3 | VGINYQPPTVVPGGDLAK       | 50d | 28 |
| FBgn0003884 | 845.16  | 44  | 1 | AVFVDLEPTVVDEV R         | 52d | 28 |
| FBgn0003884 | 917.9   | 45  | 1 | AYHEQLSVAEITNACFEPANQMVK | 52d | 28 |
| FBgn0003884 | 536.86  | 59  | 2 | EIVDLVLDR                | 52d | 28 |
| FBgn0003884 | 893.71  | 63  | 3 | IHFPLVTYAPVISA EK        | 52d | 28 |
| FBgn0003884 | 860.5   | 44  | 2 | NLDIERPTYTNLNR           | 52d | 28 |
| FBgn0003884 | 706.23  | 36  | 1 | QLFHPEQLITGK             | 52d | 28 |

|             |         |     |   |                            |      |    |
|-------------|---------|-----|---|----------------------------|------|----|
| FBgn0003884 | 800.28  | 80  | 3 | TIQFVDWCPTGFK              | 52d  | 28 |
| FBgn0003884 | 913.47  | 52  | 3 | VGINYQPPTVVPGLDLAK         | 52d  | 28 |
| FBgn0003884 | 563.72  | 67  | 3 | AVFVDLEPTVVDEVV            | 56d  | 28 |
| FBgn0003884 | 536.73  | 56  | 2 | EIVDLVLDR                  | 56d  | 28 |
| FBgn0003884 | 1205.38 | 80  | 4 | FDGALNVDLTFEQTNLVPYPR      | 56d  | 28 |
| FBgn0003884 | 893.74  | 81  | 3 | IHFPLVTYAPVISA EK          | 56d  | 28 |
| FBgn0003884 | 729.74  | 57  | 1 | LIGQIVSSITASLR             | 56d  | 28 |
| FBgn0003884 | 860.44  | 46  | 2 | NLDIERPTYTNLNR             | 56d  | 28 |
| FBgn0003884 | 800.36  | 58  | 2 | TIQFVDWCPTGFK              | 56d  | 28 |
| FBgn0003884 | 997.94  | 95  | 3 | TVGGGDDSFNTFFSETGAGK       | 56d  | 28 |
| FBgn0003887 | 566.47  | 53  | 2 | FPGQLNADLR                 | 2d   | 18 |
| FBgn0003887 | 615.95  | 94  | 2 | ISEQFTAMFR                 | 2d   | 18 |
| FBgn0003887 | 1376.22 | 40  | 1 | LTTPTYGDLNHLVSLTMSGVTTCLR  | 2d   | 18 |
| FBgn0003887 | 929.57  | 53  | 1 | MSATFIGNSTAIQELFK          | 2d   | 18 |
| FBgn0003887 | 1400.08 | 60  | 4 | SGPFGQIFRPDNFVFGQSGAGNNWAK | 2d   | 18 |
| FBgn0003887 | 527.83  | 54  | 3 | YLTVA AIFR                 | 2d   | 18 |
| FBgn0003887 | 731.54  | 63  | 2 | EVDEQMLNIQNK               | 22d  | 18 |
| FBgn0003887 | 980.64  | 67  | 1 | GHYTEGAELVDSVLDVVR         | 22d  | 18 |
| FBgn0003887 | 930.12  | 54  | 1 | MSATFIGNSTAIQELFK          | 22d  | 18 |
| FBgn0003887 | 933.89  | 70  | 2 | SGPFGQIFRPDNFVFGQSGAGNNWAK | 22d  | 18 |
| FBgn0003887 | 846.8   | 46  | 2 | ALTVPELTQQMFD AK           | 42d  | 18 |
| FBgn0003887 | 930.18  | 85  | 2 | MSATFIGNSTAIQELFK          | 42d  | 18 |
| FBgn0003887 | 933.94  | 48  | 3 | SGPFGQIFRPDNFVFGQSGAGNNWAK | 42d  | 18 |
| FBgn0003887 | 1400.1  | 46  | 2 | SGPFGQIFRPDNFVFGQSGAGNNWAK | 62d  | 18 |
| FBgn0003887 | 566.26  | 58  | 2 | FPGQLNADLR                 | 82d  | 18 |
| FBgn0003887 | 933.75  | 72  | 4 | SGPFGQIFRPDNFVFGQSGAGNNWAK | 82d  | 18 |
| FBgn0003887 | 527.6   | 51  | 1 | YLTVA AIFR                 | 82d  | 18 |
| FBgn0003887 | 731.38  | 51  | 1 | EVDEQMLNIQNK               | 102d | 18 |
| FBgn0003887 | 980.45  | 107 | 2 | GHYTEGAELVDSVLDVVR         | 102d | 18 |
| FBgn0003887 | 929.8   | 69  | 1 | MSATFIGNSTAIQELFK          | 102d | 18 |
| FBgn0003887 | 933.93  | 55  | 3 | SGPFGQIFRPDNFVFGQSGAGNNWAK | 102d | 18 |
| FBgn0003887 | 980.59  | 95  | 3 | GHYTEGAELVDSVLDVVR         | 112d | 18 |

|             |         |    |   |                            |      |    |
|-------------|---------|----|---|----------------------------|------|----|
| FBgn0003887 | 933.87  | 79 | 3 | SGPFGQIFRPDNFVFGQSGAGNNWAK | 112d | 18 |
| FBgn0003887 | 615.83  | 75 | 2 | ISEQFTAMFR                 | 122d | 18 |
| FBgn0003887 | 849.25  | 46 | 1 | NSSYFVEWIPNNVK             | 122d | 18 |
| FBgn0003887 | 933.42  | 79 | 3 | SGPFGQIFRPDNFVFGQSGAGNNWAK | 122d | 18 |
| FBgn0003887 | 933.75  | 79 | 2 | SGPFGQIFRPDNFVFGQSGAGNNWAK | 132d | 18 |
| FBgn0003887 | 933.53  | 60 | 3 | SGPFGQIFRPDNFVFGQSGAGNNWAK | 142d | 18 |
| FBgn0003887 | 731.32  | 69 | 2 | EVDEQMLNIQNK               | 2d   | 28 |
| FBgn0003887 | 565.89  | 63 | 3 | FPGQLNADLR                 | 2d   | 28 |
| FBgn0003887 | 979.79  | 89 | 2 | GHYTEGAELVDSVLDVVR         | 2d   | 28 |
| FBgn0003887 | 615.65  | 76 | 1 | ISEQFTAMFR                 | 2d   | 28 |
| FBgn0003887 | 1376.19 | 59 | 1 | LTTPTYGDLNHLVSLTMSGVTTCLR  | 2d   | 28 |
| FBgn0003887 | 930.21  | 92 | 1 | MSATFIGNSTAIQELFK          | 2d   | 28 |
| FBgn0003887 | 933.95  | 68 | 4 | SGPFGQIFRPDNFVFGQSGAGNNWAK | 2d   | 28 |
| FBgn0003887 | 527.74  | 48 | 1 | YLTVA AIFR                 | 2d   | 28 |
| FBgn0003887 | 615.79  | 87 | 2 | ISEQFTAMFR                 | 12d  | 28 |
| FBgn0003887 | 1376.44 | 58 | 2 | LTTPTYGDLNHLVSLTMSGVTTCLR  | 12d  | 28 |
| FBgn0003887 | 933.86  | 72 | 2 | SGPFGQIFRPDNFVFGQSGAGNNWAK | 12d  | 28 |
| FBgn0003887 | 930.15  | 63 | 1 | MSATFIGNSTAIQELFK          | 22d  | 28 |
| FBgn0003887 | 933.66  | 75 | 2 | SGPFGQIFRPDNFVFGQSGAGNNWAK | 22d  | 28 |
| FBgn0003887 | 980.67  | 37 | 1 | GHYTEGAELVDSVLDVVR         | 32d  | 28 |
| FBgn0003887 | 615.71  | 80 | 2 | ISEQFTAMFR                 | 32d  | 28 |
| FBgn0003887 | 930.14  | 58 | 1 | MSATFIGNSTAIQELFK          | 32d  | 28 |
| FBgn0003887 | 849.35  | 45 | 1 | NSSYFVEWIPNNVK             | 32d  | 28 |
| FBgn0003887 | 933.87  | 79 | 3 | SGPFGQIFRPDNFVFGQSGAGNNWAK | 32d  | 28 |
| FBgn0003887 | 847.14  | 36 | 1 | ALTVPELTQQMFDAK            | 36d  | 28 |
| FBgn0003887 | 731.49  | 69 | 3 | EVDEQMLNIQNK               | 36d  | 28 |
| FBgn0003887 | 929.73  | 64 | 2 | MSATFIGNSTAIQELFK          | 36d  | 28 |
| FBgn0003887 | 933.38  | 68 | 2 | SGPFGQIFRPDNFVFGQSGAGNNWAK | 36d  | 28 |
| FBgn0003887 | 528.03  | 49 | 2 | YLTVA AIFR                 | 36d  | 28 |
| FBgn0003887 | 615.76  | 75 | 2 | ISEQFTAMFR                 | 42d  | 28 |
| FBgn0003887 | 930.2   | 82 | 2 | MSATFIGNSTAIQELFK          | 42d  | 28 |
| FBgn0003887 | 849.51  | 54 | 2 | NSSYFVEWIPNNVK             | 42d  | 28 |

|             |         |     |   |                            |      |    |
|-------------|---------|-----|---|----------------------------|------|----|
| FBgn0003887 | 1400.2  | 68  | 2 | SGPFGQIFRPDNFVFGQSGAGNNWAK | 42d  | 28 |
| FBgn0003887 | 731.42  | 64  | 2 | EVDEQMLNIQNK               | 46d  | 28 |
| FBgn0003887 | 930.05  | 73  | 2 | MSATFIGNSTAIQELFK          | 46d  | 28 |
| FBgn0003887 | 933.33  | 70  | 2 | SGPFGQIFRPDNFVFGQSGAGNNWAK | 46d  | 28 |
| FBgn0003887 | 527.61  | 48  | 1 | YLTVA AIFR                 | 46d  | 28 |
| FBgn0003887 | 980.56  | 100 | 3 | GHYTEGAELVDSVLDVVR         | 50d  | 28 |
| FBgn0003887 | 615.8   | 59  | 1 | ISEQFTAMFR                 | 50d  | 28 |
| FBgn0003887 | 930.16  | 70  | 1 | MSATFIGNSTAIQELFK          | 50d  | 28 |
| FBgn0003887 | 1400.2  | 41  | 2 | SGPFGQIFRPDNFVFGQSGAGNNWAK | 50d  | 28 |
| FBgn0003887 | 615.59  | 75  | 1 | ISEQFTAMFR                 | 52d  | 28 |
| FBgn0003887 | 1376.32 | 56  | 1 | LTTPTYGDLNHLVSLTMSGVTTCLR  | 52d  | 28 |
| FBgn0003887 | 930.05  | 73  | 1 | MSATFIGNSTAIQELFK          | 52d  | 28 |
| FBgn0003887 | 849.33  | 50  | 2 | NSSYFVEWIPNNVK             | 52d  | 28 |
| FBgn0003887 | 1400.03 | 43  | 2 | SGPFGQIFRPDNFVFGQSGAGNNWAK | 52d  | 28 |
| FBgn0003887 | 731.09  | 69  | 1 | EVDEQMLNIQNK               | 56d  | 28 |
| FBgn0003887 | 615.9   | 75  | 2 | ISEQFTAMFR                 | 56d  | 28 |
| FBgn0003887 | 929.99  | 72  | 2 | MSATFIGNSTAIQELFK          | 56d  | 28 |
| FBgn0003887 | 849.43  | 52  | 2 | NSSYFVEWIPNNVK             | 56d  | 28 |
| FBgn0003887 | 1400.16 | 41  | 1 | SGPFGQIFRPDNFVFGQSGAGNNWAK | 56d  | 28 |
| FBgn0003888 | 731.54  | 59  | 2 | EVDEQMLNIQNK               | 62d  | 18 |
| FBgn0003888 | 849.46  | 35  | 1 | NSSYFVEWIPNNVK             | 82d  | 18 |
| FBgn0003888 | 849.33  | 53  | 1 | NSSYFVEWIPNNVK             | 102d | 18 |
| FBgn0003888 | 566.29  | 38  | 1 | FPGQLNADLR                 | 112d | 18 |
| FBgn0003888 | 849.64  | 41  | 2 | NSSYFVEWIPNNVK             | 112d | 18 |
| FBgn0003888 | 404.78  | 39  | 1 | YKKLQK                     | 112d | 18 |
| FBgn0003888 | 846.96  | 52  | 1 | ALTVPELTQQMFDK             | 122d | 18 |
| FBgn0003888 | 848.6   | 46  | 1 | NSSYFVEWIPNNVK             | 142d | 18 |
| FBgn0003888 | 849.17  | 40  | 1 | NSSYFVEWIPNNVK             | 50d  | 28 |
| FBgn0003889 | 925.23  | 64  | 1 | SGAFGQIFRPDNFVFGQSGAGNNWAK | 82d  | 18 |
| FBgn0003889 | 731.21  | 51  | 1 | EVDEQMLNIQNK               | 132d | 18 |
| FBgn0003889 | 846.9   | 43  | 1 | ALTVPELTQQMFDK             | 142d | 18 |
| FBgn0003889 | 731.2   | 69  | 1 | EVDEQMLNIQNK               | 12d  | 28 |

|             |         |     |   |                     |      |    |
|-------------|---------|-----|---|---------------------|------|----|
| FBgn0003889 | 847.17  | 56  | 2 | ALTVPELTQQMFDK      | 22d  | 28 |
| FBgn0003889 | 731.17  | 56  | 2 | EVDEQMLNIQNK        | 22d  | 28 |
| FBgn0003889 | 566.27  | 53  | 1 | FPGQLNADLR          | 52d  | 28 |
| FBgn0003889 | 539.81  | 40  | 1 | IREEYPDR            | 56d  | 28 |
| FBgn0003890 | 615.77  | 81  | 2 | ISEQFTAMFR          | 22d  | 18 |
| FBgn0003890 | 668.13  | 48  | 1 | GHYTEGAELIDSVLEVLR  | 42d  | 18 |
| FBgn0003890 | 668.07  | 78  | 3 | GHYTEGAELIDSVLEVLR  | 62d  | 18 |
| FBgn0003890 | 1001.5  | 43  | 1 | GHYTEGAELIDSVLEVLR  | 82d  | 18 |
| FBgn0003890 | 615.3   | 54  | 2 | ISEQFTAMFR          | 102d | 18 |
| FBgn0003890 | 615.64  | 75  | 1 | ISEQFTAMFR          | 112d | 18 |
| FBgn0003890 | 929.84  | 38  | 2 | MSATFIGNSTAIQEIFK   | 122d | 18 |
| FBgn0003890 | 1001.69 | 39  | 1 | GHYTEGAELIDSVLEVLR  | 2d   | 28 |
| FBgn0003890 | 930.17  | 74  | 1 | MSATFIGNSTAIQEIFK   | 42d  | 28 |
| FBgn0003890 | 1001.69 | 84  | 1 | GHYTEGAELIDSVLEVLR  | 52d  | 28 |
| FBgn0003890 | 930.07  | 76  | 1 | MSATFIGNSTAIQEIFK   | 52d  | 28 |
| FBgn0003909 | 372.35  | 39  | 1 | QRARGR              | 22d  | 18 |
| FBgn0003941 | 535.01  | 70  | 3 | ESTLHLVLR           | 2d   | 18 |
| FBgn0003941 | 534.85  | 73  | 2 | ESTLHLVLR           | 62d  | 18 |
| FBgn0003941 | 534.75  | 67  | 1 | ESTLHLVLR           | 82d  | 18 |
| FBgn0003941 | 894.62  | 47  | 1 | TITLEVEPSDTIENVK    | 82d  | 18 |
| FBgn0003941 | 534.62  | 64  | 3 | ESTLHLVLR           | 2d   | 28 |
| FBgn0003941 | 894.9   | 62  | 2 | TITLEVEPSDTIENVK    | 32d  | 28 |
| FBgn0003941 | 895.08  | 34  | 1 | TITLEVEPSDTIENVK    | 56d  | 28 |
| FBgn0003942 | 541.55  | 35  | 1 | TLSDYNIQK           | 42d  | 28 |
| FBgn0003942 | 534.71  | 36  | 2 | ESTLHLVLR           | 46d  | 28 |
| FBgn0003943 | 895.01  | 50  | 3 | TITLEVEPSDTIENVK    | 36d  | 28 |
| FBgn0004028 | 1217.9  | 36  | 1 | NLSDASEGELQEICEEYER | 2d   | 18 |
| FBgn0004028 | 908.53  | 72  | 1 | DWEINDLNAQVNDLR     | 22d  | 18 |
| FBgn0004028 | 706.05  | 50  | 1 | EFTLEEEKEK          | 22d  | 18 |
| FBgn0004028 | 908.6   | 100 | 1 | DWEINDLNAQVNDLR     | 42d  | 18 |
| FBgn0004028 | 908.64  | 105 | 2 | DWEINDLNAQVNDLR     | 62d  | 18 |
| FBgn0004028 | 706.38  | 64  | 2 | EFTLEEEKEK          | 62d  | 18 |

|             |         |     |   |                        |      |    |
|-------------|---------|-----|---|------------------------|------|----|
| FBgn0004028 | 883.12  | 60  | 1 | LESEKYDFEYDVAR         | 62d  | 18 |
| FBgn0004028 | 908.34  | 78  | 2 | DWEINDLNAQVNDLR        | 82d  | 18 |
| FBgn0004028 | 706.46  | 60  | 3 | EFTLEEEEEKEK           | 82d  | 18 |
| FBgn0004028 | 706.35  | 48  | 1 | EFTLEEEEEKEK           | 102d | 18 |
| FBgn0004028 | 706.29  | 40  | 1 | EFTLEEEEEKEK           | 122d | 18 |
| FBgn0004028 | 706.36  | 42  | 1 | EFTLEEEEEKEK           | 132d | 18 |
| FBgn0004028 | 706.5   | 57  | 2 | EFTLEEEEEKEK           | 142d | 18 |
| FBgn0004028 | 555.99  | 56  | 1 | WDLEYEVR               | 142d | 18 |
| FBgn0004028 | 908.56  | 96  | 2 | DWEINDLNAQVNDLR        | 2d   | 28 |
| FBgn0004028 | 706.46  | 52  | 3 | EFTLEEEEEKEK           | 2d   | 28 |
| FBgn0004028 | 706.21  | 64  | 3 | EFTLEEEEEKEK           | 12d  | 28 |
| FBgn0004028 | 1218.21 | 95  | 2 | NLSDASEGELQEICEEYYER   | 12d  | 28 |
| FBgn0004028 | 908.4   | 44  | 1 | DWEINDLNAQVNDLR        | 32d  | 28 |
| FBgn0004028 | 706.09  | 57  | 3 | EFTLEEEEEKEK           | 32d  | 28 |
| FBgn0004028 | 706.13  | 45  | 3 | EFTLEEEEEKEK           | 36d  | 28 |
| FBgn0004028 | 706.18  | 59  | 3 | EFTLEEEEEKEK           | 42d  | 28 |
| FBgn0004028 | 706.15  | 55  | 3 | EFTLEEEEEKEK           | 46d  | 28 |
| FBgn0004028 | 908.6   | 69  | 1 | DWEINDLNAQVNDLR        | 50d  | 28 |
| FBgn0004028 | 706.16  | 60  | 2 | EFTLEEEEEKEK           | 50d  | 28 |
| FBgn0004028 | 908.49  | 61  | 1 | DWEINDLNAQVNDLR        | 52d  | 28 |
| FBgn0004028 | 706.42  | 55  | 2 | EFTLEEEEEKEK           | 52d  | 28 |
| FBgn0004028 | 1217.96 | 102 | 2 | NLSDASEGELQEICEEYYER   | 52d  | 28 |
| FBgn0004028 | 908.5   | 88  | 2 | DWEINDLNAQVNDLR        | 56d  | 28 |
| FBgn0004047 | 614.32  | 53  | 1 | LENQPLEQGAK            | 62d  | 18 |
| FBgn0004066 | 1222.84 | 110 | 1 | AVTIFSPDGHLLQVEYAQEAVR | 102d | 18 |
| FBgn0004066 | 1222.68 | 91  | 1 | AVTIFSPDGHLLQVEYAQEAVR | 112d | 18 |
| FBgn0004066 | 1222.85 | 57  | 1 | AVTIFSPDGHLLQVEYAQEAVR | 122d | 18 |
| FBgn0004103 | 820.93  | 38  | 1 | AHQVVEDGYEFFAK         | 2d   | 18 |
| FBgn0004103 | 977.78  | 48  | 1 | EIFLSQPILLELEAPLK      | 42d  | 18 |
| FBgn0004117 | 766.11  | 64  | 2 | EVDRLLEDLGINK          | 2d   | 18 |
| FBgn0004117 | 882.37  | 143 | 1 | KLAFVEDELEVAEDR        | 2d   | 18 |
| FBgn0004117 | 731.3   | 76  | 1 | LLEATQSADENNR          | 2d   | 18 |

|             |        |     |   |                 |      |    |
|-------------|--------|-----|---|-----------------|------|----|
| FBgn0004117 | 767.38 | 82  | 3 | LLTATESEVATQNR  | 2d   | 18 |
| FBgn0004117 | 765.71 | 43  | 1 | EVDRELEDELGINK  | 22d  | 18 |
| FBgn0004117 | 767.65 | 103 | 3 | LLTATESEVATQNR  | 22d  | 18 |
| FBgn0004117 | 882.49 | 100 | 3 | KLAFVEDELEVAEDR | 42d  | 18 |
| FBgn0004117 | 767.62 | 89  | 1 | LLTATESEVATQNR  | 42d  | 18 |
| FBgn0004117 | 766.03 | 42  | 2 | EVDRELEDELGINK  | 62d  | 18 |
| FBgn0004117 | 882.54 | 119 | 1 | KLAFVEDELEVAEDR | 62d  | 18 |
| FBgn0004117 | 680.32 | 69  | 2 | KVQQIEEDLEK     | 62d  | 18 |
| FBgn0004117 | 731.33 | 83  | 2 | LLEATQSADENNR   | 62d  | 18 |
| FBgn0004117 | 767.58 | 93  | 6 | LLTATESEVATQNR  | 62d  | 18 |
| FBgn0004117 | 766.02 | 51  | 2 | EVDRELEDELGINK  | 82d  | 18 |
| FBgn0004117 | 882.67 | 55  | 1 | KLAFVEDELEVAEDR | 82d  | 18 |
| FBgn0004117 | 680.42 | 81  | 1 | KVQQIEEDLEK     | 82d  | 18 |
| FBgn0004117 | 731.29 | 96  | 2 | LLEATQSADENNR   | 82d  | 18 |
| FBgn0004117 | 767.36 | 97  | 3 | LLTATESEVATQNR  | 82d  | 18 |
| FBgn0004117 | 616.24 | 42  | 1 | VQQIEEDLEK      | 82d  | 18 |
| FBgn0004117 | 767.36 | 106 | 3 | LLTATESEVATQNR  | 102d | 18 |
| FBgn0004117 | 731.44 | 71  | 1 | LLEATQSADENNR   | 112d | 18 |
| FBgn0004117 | 767.53 | 96  | 2 | LLTATESEVATQNR  | 112d | 18 |
| FBgn0004117 | 866.91 | 34  | 1 | VQQIEEDLEKSEER  | 122d | 18 |
| FBgn0004117 | 765.98 | 48  | 1 | EVDRELEDELGINK  | 132d | 18 |
| FBgn0004117 | 882.23 | 55  | 2 | KLAFVEDELEVAEDR | 2d   | 28 |
| FBgn0004117 | 731.15 | 92  | 5 | LLEATQSADENNR   | 2d   | 28 |
| FBgn0004117 | 767.17 | 105 | 4 | LLTATESEVATQNR  | 2d   | 28 |
| FBgn0004117 | 765.64 | 39  | 1 | EVDRELEDELGINK  | 12d  | 28 |
| FBgn0004117 | 567.81 | 35  | 1 | IMELEEEELK      | 12d  | 28 |
| FBgn0004117 | 882.68 | 83  | 1 | KLAFVEDELEVAEDR | 12d  | 28 |
| FBgn0004117 | 731.5  | 92  | 3 | LLEATQSADENNR   | 12d  | 28 |
| FBgn0004117 | 767.31 | 106 | 4 | LLTATESEVATQNR  | 12d  | 28 |
| FBgn0004117 | 866.73 | 77  | 2 | VQQIEEDLEKSEER  | 12d  | 28 |
| FBgn0004117 | 765.85 | 56  | 3 | EVDRELEDELGINK  | 22d  | 28 |
| FBgn0004117 | 765.82 | 60  | 3 | EVDRELEDELGINK  | 32d  | 28 |

|             |         |     |   |                      |     |    |
|-------------|---------|-----|---|----------------------|-----|----|
| FBgn0004117 | 680.28  | 75  | 2 | KVQQIEEDLEK          | 32d | 28 |
| FBgn0004117 | 767.59  | 96  | 1 | LLTATESEVATQNR       | 32d | 28 |
| FBgn0004117 | 766.09  | 54  | 2 | EVDRELEDELGINK       | 36d | 28 |
| FBgn0004117 | 680.37  | 67  | 1 | KVQQIEEDLEK          | 36d | 28 |
| FBgn0004117 | 767.13  | 100 | 2 | LLTATESEVATQNR       | 36d | 28 |
| FBgn0004117 | 765.73  | 46  | 1 | EVDRELEDELGINK       | 42d | 28 |
| FBgn0004117 | 680.42  | 75  | 2 | KVQQIEEDLEK          | 42d | 28 |
| FBgn0004117 | 731.21  | 56  | 2 | LLEATQSADENNR        | 42d | 28 |
| FBgn0004117 | 767.3   | 97  | 2 | LLTATESEVATQNR       | 42d | 28 |
| FBgn0004117 | 766.04  | 48  | 2 | EVDRELEDELGINK       | 46d | 28 |
| FBgn0004117 | 567.56  | 40  | 1 | IMELEEELK            | 46d | 28 |
| FBgn0004117 | 766.03  | 58  | 3 | EVDRELEDELGINK       | 50d | 28 |
| FBgn0004117 | 767.59  | 87  | 1 | LLTATESEVATQNR       | 50d | 28 |
| FBgn0004117 | 765.93  | 54  | 3 | EVDRELEDELGINK       | 52d | 28 |
| FBgn0004117 | 767.36  | 107 | 2 | LLTATESEVATQNR       | 52d | 28 |
| FBgn0004117 | 882.58  | 108 | 4 | KLAFVEDELEVAEDR      | 56d | 28 |
| FBgn0004167 | 1141.19 | 50  | 1 | DASLISEDYGDLESIQALGR | 12d | 28 |
| FBgn0004167 | 1140.93 | 53  | 2 | DASLISEDYGDLESIQALGR | 56d | 28 |
| FBgn0004169 | 615.48  | 54  | 2 | AQELWELIVK           | 2d  | 18 |
| FBgn0004169 | 689.28  | 62  | 2 | DAGVLGLSSAAMER       | 2d  | 18 |
| FBgn0004169 | 1100.3  | 41  | 2 | EETKPPQTPAEGEGDPEFIK | 2d  | 18 |
| FBgn0004169 | 687.31  | 46  | 2 | IKPLAIEGFGEAK        | 2d  | 18 |
| FBgn0004169 | 613.6   | 50  | 2 | KPPQTPAEGEGDPEFIK    | 2d  | 18 |
| FBgn0004169 | 713.22  | 58  | 3 | LETEKYDLEER          | 2d  | 18 |
| FBgn0004169 | 641.22  | 69  | 2 | LFEGGWDEISK          | 2d  | 18 |
| FBgn0004169 | 927.68  | 77  | 2 | LFEGGWDEISKDSNEK     | 2d  | 18 |
| FBgn0004169 | 689.43  | 62  | 1 | DAGVLGLSSAAMER       | 22d | 18 |
| FBgn0004169 | 920.75  | 39  | 2 | KPPQTPAEGEGDPEFIK    | 22d | 18 |
| FBgn0004169 | 713.23  | 82  | 3 | LETEKYDLEER          | 22d | 18 |
| FBgn0004169 | 641.06  | 73  | 2 | LFEGGWDEISK          | 22d | 18 |
| FBgn0004169 | 615.52  | 52  | 2 | AQELWELIVK           | 42d | 18 |
| FBgn0004169 | 687.63  | 61  | 1 | IKPLAIEGFGEAK        | 42d | 18 |



|             |        |    |   |                   |      |    |
|-------------|--------|----|---|-------------------|------|----|
| FBgn0004169 | 613.6  | 57 | 3 | KPPQTPAEGEGDPEFIK | 42d  | 18 |
| FBgn0004169 | 713.26 | 45 | 1 | LETEKYDLEER       | 42d  | 18 |
| FBgn0004169 | 641.49 | 71 | 3 | LFEGGWDEISK       | 42d  | 18 |
| FBgn0004169 | 927.92 | 85 | 1 | LFEGGWDEISKDSNEK  | 42d  | 18 |
| FBgn0004169 | 615.26 | 46 | 1 | AQELWELIVK        | 62d  | 18 |
| FBgn0004169 | 614.32 | 50 | 2 | KPPQTPAEGEGDPEFIK | 62d  | 18 |
| FBgn0004169 | 713.35 | 59 | 2 | LETEKYDLEER       | 62d  | 18 |
| FBgn0004169 | 613.76 | 46 | 3 | KPPQTPAEGEGDPEFIK | 82d  | 18 |
| FBgn0004169 | 713.5  | 49 | 2 | LETEKYDLEER       | 82d  | 18 |
| FBgn0004169 | 641.52 | 53 | 2 | LFEGGWDEISK       | 82d  | 18 |
| FBgn0004169 | 918.04 | 88 | 1 | LFEGGYNTVYAETLEK  | 82d  | 18 |
| FBgn0004169 | 615.58 | 54 | 2 | AQELWELIVK        | 102d | 18 |
| FBgn0004169 | 689.35 | 84 | 3 | DAGVLGLSSAAMER    | 102d | 18 |
| FBgn0004169 | 641.17 | 69 | 2 | LFEGGWDEISK       | 102d | 18 |
| FBgn0004169 | 927.82 | 42 | 1 | LFEGGWDEISKDSNEK  | 102d | 18 |
| FBgn0004169 | 615.02 | 54 | 1 | AQELWELIVK        | 112d | 18 |
| FBgn0004169 | 687.41 | 53 | 1 | IKPLAIEGFGEAK     | 112d | 18 |
| FBgn0004169 | 921.07 | 36 | 1 | KPPQTPAEGEGDPEFIK | 112d | 18 |
| FBgn0004169 | 641.44 | 62 | 2 | LFEGGWDEISK       | 112d | 18 |
| FBgn0004169 | 927.84 | 44 | 1 | LFEGGWDEISKDSNEK  | 112d | 18 |
| FBgn0004169 | 614.89 | 55 | 1 | AQELWELIVK        | 122d | 18 |
| FBgn0004169 | 689.52 | 74 | 1 | DAGVLGLSSAAMER    | 122d | 18 |
| FBgn0004169 | 613.9  | 46 | 3 | KPPQTPAEGEGDPEFIK | 122d | 18 |
| FBgn0004169 | 641.18 | 73 | 1 | LFEGGWDEISK       | 122d | 18 |
| FBgn0004169 | 927.95 | 54 | 2 | LFEGGWDEISKDSNEK  | 122d | 18 |
| FBgn0004169 | 615.53 | 51 | 2 | AQELWELIVK        | 132d | 18 |
| FBgn0004169 | 687.63 | 45 | 1 | IKPLAIEGFGEAK     | 132d | 18 |
| FBgn0004169 | 641.16 | 47 | 1 | LFEGGWDEISK       | 132d | 18 |
| FBgn0004169 | 689.38 | 61 | 1 | DAGVLGLSSAAMER    | 142d | 18 |
| FBgn0004169 | 687.4  | 41 | 1 | IKPLAIEGFGEAK     | 142d | 18 |
| FBgn0004169 | 921.2  | 36 | 1 | KPPQTPAEGEGDPEFIK | 142d | 18 |
| FBgn0004169 | 713.28 | 50 | 1 | LETEKYDLEER       | 142d | 18 |

|             |        |    |   |                   |      |    |
|-------------|--------|----|---|-------------------|------|----|
| FBgn0004169 | 640.58 | 64 | 1 | LFEGGWDEISK       | 142d | 18 |
| FBgn0004169 | 928.03 | 74 | 1 | LFEGGWDEISKDSNEK  | 142d | 18 |
| FBgn0004169 | 615.38 | 51 | 1 | AQELWELIVK        | 2d   | 28 |
| FBgn0004169 | 689.4  | 73 | 2 | DAGVLGLSSAAMER    | 2d   | 28 |
| FBgn0004169 | 687.28 | 50 | 3 | IKPLAIEGFGEAK     | 2d   | 28 |
| FBgn0004169 | 613.88 | 39 | 3 | KPPQTPAEGEGDPEFIK | 2d   | 28 |
| FBgn0004169 | 713.2  | 55 | 3 | LETEKYDLEER       | 2d   | 28 |
| FBgn0004169 | 641.14 | 73 | 3 | LFEGGWDEISK       | 2d   | 28 |
| FBgn0004169 | 927.93 | 71 | 3 | LFEGGWDEISKDSNEK  | 2d   | 28 |
| FBgn0004169 | 615.41 | 51 | 3 | AQELWELIVK        | 12d  | 28 |
| FBgn0004169 | 687.4  | 47 | 3 | IKPLAIEGFGEAK     | 12d  | 28 |
| FBgn0004169 | 614.14 | 45 | 3 | KPPQTPAEGEGDPEFIK | 12d  | 28 |
| FBgn0004169 | 713.4  | 53 | 2 | LETEKYDLEER       | 12d  | 28 |
| FBgn0004169 | 641.3  | 70 | 3 | LFEGGWDEISK       | 12d  | 28 |
| FBgn0004169 | 927.74 | 75 | 2 | LFEGGWDEISKDSNEK  | 12d  | 28 |
| FBgn0004169 | 453.31 | 41 | 1 | EQLEEEK           | 22d  | 28 |
| FBgn0004169 | 687.6  | 53 | 3 | IKPLAIEGFGEAK     | 22d  | 28 |
| FBgn0004169 | 713.24 | 73 | 3 | LETEKYDLEER       | 22d  | 28 |
| FBgn0004169 | 641.49 | 60 | 2 | LFEGGWDEISK       | 22d  | 28 |
| FBgn0004169 | 618.99 | 75 | 3 | LFEGGWDEISKDSNEK  | 22d  | 28 |
| FBgn0004169 | 687.37 | 44 | 2 | IKPLAIEGFGEAK     | 32d  | 28 |
| FBgn0004169 | 920.78 | 49 | 2 | KPPQTPAEGEGDPEFIK | 32d  | 28 |
| FBgn0004169 | 713.14 | 59 | 3 | LETEKYDLEER       | 32d  | 28 |
| FBgn0004169 | 641.48 | 73 | 1 | LFEGGWDEISK       | 32d  | 28 |
| FBgn0004169 | 928.05 | 34 | 1 | LFEGGWDEISKDSNEK  | 32d  | 28 |
| FBgn0004169 | 614.43 | 46 | 2 | KPPQTPAEGEGDPEFIK | 36d  | 28 |
| FBgn0004169 | 713.34 | 56 | 3 | LETEKYDLEER       | 36d  | 28 |
| FBgn0004169 | 641.4  | 71 | 3 | LFEGGWDEISK       | 36d  | 28 |
| FBgn0004169 | 927.95 | 81 | 1 | LFEGGWDEISKDSNEK  | 36d  | 28 |
| FBgn0004169 | 689.36 | 54 | 2 | DAGVLGLSSAAMER    | 42d  | 28 |
| FBgn0004169 | 920.85 | 34 | 1 | KPPQTPAEGEGDPEFIK | 42d  | 28 |
| FBgn0004169 | 713.21 | 66 | 1 | LETEKYDLEER       | 42d  | 28 |

|             |         |    |   |                         |      |    |
|-------------|---------|----|---|-------------------------|------|----|
| FBgn0004169 | 641.23  | 68 | 2 | LFEGGWDEISK             | 42d  | 28 |
| FBgn0004169 | 927.89  | 85 | 3 | LFEGGWDEISKDSNEK        | 42d  | 28 |
| FBgn0004169 | 687.45  | 38 | 1 | IKPLAIEGFGEAK           | 46d  | 28 |
| FBgn0004169 | 921.18  | 56 | 1 | KPPQTPAEGEGDPEFIK       | 46d  | 28 |
| FBgn0004169 | 713.19  | 82 | 3 | LETEKYDLEER             | 46d  | 28 |
| FBgn0004169 | 641.19  | 75 | 3 | LFEGGWDEISK             | 46d  | 28 |
| FBgn0004169 | 927.8   | 83 | 3 | LFEGGWDEISKDSNEK        | 46d  | 28 |
| FBgn0004169 | 615.37  | 53 | 1 | AQELWELIVK              | 50d  | 28 |
| FBgn0004169 | 689.42  | 45 | 1 | DAGVLGLSSAAMER          | 50d  | 28 |
| FBgn0004169 | 734.16  | 38 | 1 | EETKPPQTPAEGEGDPEFIK    | 50d  | 28 |
| FBgn0004169 | 613.81  | 47 | 3 | KPPQTPAEGEGDPEFIK       | 50d  | 28 |
| FBgn0004169 | 713.22  | 60 | 3 | LETEKYDLEER             | 50d  | 28 |
| FBgn0004169 | 641.47  | 73 | 2 | LFEGGWDEISK             | 50d  | 28 |
| FBgn0004169 | 927.87  | 42 | 3 | LFEGGWDEISKDSNEK        | 50d  | 28 |
| FBgn0004169 | 613.61  | 45 | 3 | KPPQTPAEGEGDPEFIK       | 52d  | 28 |
| FBgn0004169 | 713.44  | 59 | 1 | LETEKYDLEER             | 52d  | 28 |
| FBgn0004169 | 641.35  | 59 | 2 | LFEGGWDEISK             | 52d  | 28 |
| FBgn0004169 | 615.15  | 54 | 2 | AQELWELIVK              | 56d  | 28 |
| FBgn0004169 | 614.32  | 35 | 1 | KPPQTPAEGEGDPEFIK       | 56d  | 28 |
| FBgn0004169 | 641.4   | 60 | 2 | LFEGGWDEISK             | 56d  | 28 |
| FBgn0004177 | 663.1   | 36 | 1 | FSFLQFDPAPR             | 22d  | 18 |
| FBgn0004177 | 663.13  | 58 | 1 | FSFLQFDPAPR             | 122d | 18 |
| FBgn0004177 | 662.94  | 44 | 1 | FSFLQFDPAPR             | 132d | 18 |
| FBgn0004177 | 663.01  | 61 | 2 | FSFLQFDPAPR             | 142d | 18 |
| FBgn0004177 | 663.26  | 60 | 1 | FSFLQFDPAPR             | 56d  | 28 |
| FBgn0004179 | 1170.29 | 37 | 1 | LEDVDLDDVNLGAGGAPVTSQPR | 122d | 18 |
| FBgn0004227 | 1031.12 | 34 | 1 | SISGPTFELEPVEVPTETK     | 2d   | 28 |
| FBgn0004236 | 512.74  | 50 | 1 | EDAANNYAR               | 142d | 18 |
| FBgn0004237 | 566.47  | 51 | 1 | GQGGGGWGGQNR            | 2d   | 18 |
| FBgn0004242 | 973.14  | 54 | 1 | VPLCTIDLAQTIEEWR        | 62d  | 18 |
| FBgn0004242 | 973.2   | 71 | 2 | VPLCTIDLAQTIEEWR        | 52d  | 28 |
| FBgn0004243 | 529.82  | 41 | 1 | AEQRSRALGISNASK         | 82d  | 18 |

|             |         |    |   |                       |      |    |
|-------------|---------|----|---|-----------------------|------|----|
| FBgn0004362 | 763.03  | 51 | 1 | EFEANGGSSAANGGGAK     | 2d   | 18 |
| FBgn0004363 | 1184.63 | 50 | 1 | DFVLHTAVNDGQEFSGSIFQR | 2d   | 18 |
| FBgn0004363 | 493.42  | 37 | 1 | GYNFGLWK              | 2d   | 18 |
| FBgn0004363 | 732.06  | 72 | 2 | LSLEGNFAPQSGNK        | 2d   | 18 |
| FBgn0004363 | 722.89  | 89 | 1 | LTTNNFALGYTTK         | 2d   | 18 |
| FBgn0004363 | 976.36  | 64 | 3 | TSSGIEFNTAGHSNQESGK   | 2d   | 18 |
| FBgn0004363 | 1268.05 | 73 | 3 | WNTDNTLFTEVAVQDQLEGLK | 2d   | 18 |
| FBgn0004363 | 731.84  | 62 | 5 | LSLEGNFAPQSGNK        | 22d  | 18 |
| FBgn0004363 | 634.08  | 40 | 1 | VKDYGLTLTEK           | 22d  | 18 |
| FBgn0004363 | 789.99  | 40 | 1 | DFVLHTAVNDGQEFSGSIFQR | 42d  | 18 |
| FBgn0004363 | 493.21  | 41 | 2 | GYNFGLWK              | 42d  | 18 |
| FBgn0004363 | 976.27  | 72 | 2 | TSSGIEFNTAGHSNQESGK   | 42d  | 18 |
| FBgn0004363 | 1268.21 | 72 | 1 | WNTDNTLFTEVAVQDQLEGLK | 42d  | 18 |
| FBgn0004363 | 732.12  | 61 | 2 | LSLEGNFAPQSGNK        | 62d  | 18 |
| FBgn0004363 | 976.54  | 76 | 2 | TSSGIEFNTAGHSNQESGK   | 62d  | 18 |
| FBgn0004363 | 1267.65 | 59 | 1 | WNTDNTLFTEVAVQDQLEGLK | 62d  | 18 |
| FBgn0004363 | 731.92  | 43 | 1 | LSLEGNFAPQSGNK        | 82d  | 18 |
| FBgn0004363 | 976.31  | 86 | 2 | TSSGIEFNTAGHSNQESGK   | 82d  | 18 |
| FBgn0004363 | 976.45  | 60 | 1 | TSSGIEFNTAGHSNQESGK   | 102d | 18 |
| FBgn0004363 | 1268.27 | 69 | 2 | WNTDNTLFTEVAVQDQLEGLK | 102d | 18 |
| FBgn0004363 | 508.97  | 53 | 1 | VAYGHENVK             | 112d | 18 |
| FBgn0004363 | 1268.29 | 69 | 2 | WNTDNTLFTEVAVQDQLEGLK | 112d | 18 |
| FBgn0004363 | 976.31  | 53 | 1 | TSSGIEFNTAGHSNQESGK   | 122d | 18 |
| FBgn0004363 | 732.04  | 58 | 1 | LSLEGNFAPQSGNK        | 132d | 18 |
| FBgn0004363 | 545.62  | 70 | 1 | ADSDVNIDLK            | 2d   | 28 |
| FBgn0004363 | 731.71  | 64 | 2 | LSLEGNFAPQSGNK        | 2d   | 28 |
| FBgn0004363 | 976.53  | 77 | 3 | TSSGIEFNTAGHSNQESGK   | 2d   | 28 |
| FBgn0004363 | 753.85  | 88 | 6 | VNNASQVGLGYQQK        | 2d   | 28 |
| FBgn0004363 | 731.64  | 60 | 3 | LSLEGNFAPQSGNK        | 12d  | 28 |
| FBgn0004363 | 976.16  | 79 | 3 | TSSGIEFNTAGHSNQESGK   | 12d  | 28 |
| FBgn0004363 | 753.72  | 90 | 1 | VNNASQVGLGYQQK        | 12d  | 28 |
| FBgn0004363 | 1268.23 | 82 | 3 | WNTDNTLFTEVAVQDQLEGLK | 12d  | 28 |

|             |         |     |   |                           |      |    |
|-------------|---------|-----|---|---------------------------|------|----|
| FBgn0004363 | 976.28  | 66  | 2 | TSSGIEFNTAGHSNQESGK       | 22d  | 28 |
| FBgn0004363 | 753.61  | 43  | 1 | VNNASQVGLGYQQK            | 22d  | 28 |
| FBgn0004363 | 976.33  | 88  | 1 | TSSGIEFNTAGHSNQESGK       | 32d  | 28 |
| FBgn0004363 | 753.53  | 53  | 1 | VNNASQVGLGYQQK            | 32d  | 28 |
| FBgn0004363 | 591.67  | 65  | 2 | YQLDDDASVR                | 32d  | 28 |
| FBgn0004363 | 731.76  | 42  | 1 | LSLEGNFAPQSGNK            | 36d  | 28 |
| FBgn0004363 | 731.42  | 45  | 1 | LSLEGNFAPQSGNK            | 42d  | 28 |
| FBgn0004363 | 493.28  | 38  | 2 | GYNFGLWK                  | 46d  | 28 |
| FBgn0004363 | 731.86  | 63  | 3 | LSLEGNFAPQSGNK            | 46d  | 28 |
| FBgn0004363 | 731.89  | 66  | 5 | LSLEGNFAPQSGNK            | 50d  | 28 |
| FBgn0004363 | 976.27  | 84  | 1 | TSSGIEFNTAGHSNQESGK       | 52d  | 28 |
| FBgn0004363 | 753.76  | 42  | 1 | VNNASQVGLGYQQK            | 52d  | 28 |
| FBgn0004363 | 976.35  | 73  | 1 | TSSGIEFNTAGHSNQESGK       | 56d  | 28 |
| FBgn0004366 | 527.33  | 52  | 5 | DELEDEFR                  | 22d  | 18 |
| FBgn0004366 | 582.98  | 35  | 1 | MRDHRDELEDEFR             | 22d  | 18 |
| FBgn0004366 | 526.59  | 52  | 3 | DELEDEFR                  | 22d  | 28 |
| FBgn0004366 | 583.43  | 46  | 1 | MRDHRDELEDEFR             | 22d  | 28 |
| FBgn0004366 | 526.69  | 52  | 3 | DELEDEFR                  | 32d  | 28 |
| FBgn0004366 | 527.06  | 52  | 3 | DELEDEFR                  | 36d  | 28 |
| FBgn0004366 | 526.93  | 52  | 3 | DELEDEFR                  | 42d  | 28 |
| FBgn0004366 | 527.19  | 52  | 2 | DELEDEFR                  | 50d  | 28 |
| FBgn0004366 | 526.83  | 52  | 3 | DELEDEFR                  | 52d  | 28 |
| FBgn0004366 | 940.57  | 52  | 1 | GAGVWFGPDVTDNFLQR         | 56d  | 28 |
| FBgn0004381 | 360.57  | 38  | 1 | DSKLTR                    | 12d  | 28 |
| FBgn0004401 | 1062.19 | 101 | 2 | AAAPAAVASPAAAATSADASPSPAK | 42d  | 18 |
| FBgn0004401 | 1062.24 | 94  | 3 | AAAPAAVASPAAAATSADASPSPAK | 102d | 18 |
| FBgn0004401 | 1062.09 | 81  | 1 | AAAPAAVASPAAAATSADASPSPAK | 112d | 18 |
| FBgn0004401 | 1062.28 | 120 | 1 | AAAPAAVASPAAAATSADASPSPAK | 122d | 18 |
| FBgn0004401 | 551.82  | 37  | 1 | IDYDTHLLSAEHLK            | 122d | 18 |
| FBgn0004401 | 708.34  | 54  | 1 | AAAPAAVASPAAAATSADASPSPAK | 132d | 18 |
| FBgn0004401 | 1061.93 | 99  | 3 | AAAPAAVASPAAAATSADASPSPAK | 2d   | 28 |
| FBgn0004401 | 767.16  | 37  | 1 | QTLPISTEEEEETR            | 2d   | 28 |

|             |         |    |   |                           |      |    |
|-------------|---------|----|---|---------------------------|------|----|
| FBgn0004401 | 1061.93 | 77 | 1 | AAAPAAVASPAAAATSADASPSPAK | 56d  | 28 |
| FBgn0004403 | 716.1   | 35 | 1 | IEDVTPIPSDSTR             | 102d | 18 |
| FBgn0004403 | 715.49  | 38 | 1 | IEDVTPIPSDSTR             | 142d | 18 |
| FBgn0004403 | 715.86  | 52 | 2 | IEDVTPIPSDSTR             | 2d   | 28 |
| FBgn0004432 | 813.97  | 83 | 3 | HVVFGEVVEGLDVVK           | 2d   | 18 |
| FBgn0004432 | 901.55  | 53 | 3 | SIYGNKFPDENFELK           | 2d   | 18 |
| FBgn0004432 | 807.02  | 41 | 1 | VFFDMTADNEPLGR            | 2d   | 18 |
| FBgn0004432 | 542.74  | 53 | 2 | HVVFGEVVEGLDVVK           | 22d  | 18 |
| FBgn0004432 | 814.08  | 80 | 5 | HVVFGEVVEGLDVVK           | 42d  | 18 |
| FBgn0004432 | 592.68  | 60 | 3 | KIESYGSQSGK               | 42d  | 18 |
| FBgn0004432 | 901.43  | 79 | 3 | SIYGNKFPDENFELK           | 42d  | 18 |
| FBgn0004432 | 807     | 74 | 2 | VFFDMTADNEPLGR            | 42d  | 18 |
| FBgn0004432 | 813.99  | 89 | 2 | HVVFGEVVEGLDVVK           | 62d  | 18 |
| FBgn0004432 | 901.66  | 45 | 1 | SIYGNKFPDENFELK           | 62d  | 18 |
| FBgn0004432 | 570.19  | 44 | 1 | FPDENFELK                 | 82d  | 18 |
| FBgn0004432 | 813.85  | 88 | 3 | HVVFGEVVEGLDVVK           | 82d  | 18 |
| FBgn0004432 | 901.41  | 43 | 1 | SIYGNKFPDENFELK           | 82d  | 18 |
| FBgn0004432 | 813.84  | 61 | 1 | HVVFGEVVEGLDVVK           | 102d | 18 |
| FBgn0004432 | 901.42  | 60 | 2 | SIYGNKFPDENFELK           | 102d | 18 |
| FBgn0004432 | 814.04  | 83 | 1 | HVVFGEVVEGLDVVK           | 112d | 18 |
| FBgn0004432 | 593.04  | 62 | 3 | KIESYGSQSGK               | 112d | 18 |
| FBgn0004432 | 901.38  | 54 | 2 | SIYGNKFPDENFELK           | 112d | 18 |
| FBgn0004432 | 806.95  | 65 | 1 | VFFDMTADNEPLGR            | 112d | 18 |
| FBgn0004432 | 901.63  | 46 | 1 | SIYGNKFPDENFELK           | 122d | 18 |
| FBgn0004432 | 570.39  | 46 | 1 | FPDENFELK                 | 132d | 18 |
| FBgn0004432 | 814.05  | 76 | 2 | HVVFGEVVEGLDVVK           | 132d | 18 |
| FBgn0004432 | 806.86  | 68 | 2 | VFFDMTADNEPLGR            | 132d | 18 |
| FBgn0004432 | 570.19  | 42 | 1 | FPDENFELK                 | 142d | 18 |
| FBgn0004432 | 901.58  | 64 | 3 | SIYGNKFPDENFELK           | 142d | 18 |
| FBgn0004432 | 542.82  | 62 | 3 | HVVFGEVVEGLDVVK           | 2d   | 28 |
| FBgn0004432 | 424.68  | 41 | 1 | TAWLDNK                   | 2d   | 28 |
| FBgn0004432 | 806.85  | 40 | 2 | VFFDMTADNEPLGR            | 2d   | 28 |

|             |        |    |   |                 |     |    |
|-------------|--------|----|---|-----------------|-----|----|
| FBgn0004432 | 543.03 | 85 | 3 | HVVFGEVVEGLDVVK | 12d | 28 |
| FBgn0004432 | 901.49 | 62 | 2 | SIYGNKFPDENFELK | 12d | 28 |
| FBgn0004432 | 807.02 | 50 | 1 | VFFDMTADNEPLGR  | 12d | 28 |
| FBgn0004432 | 813.9  | 83 | 3 | HVVFGEVVEGLDVVK | 22d | 28 |
| FBgn0004432 | 901.44 | 51 | 2 | SIYGNKFPDENFELK | 22d | 28 |
| FBgn0004432 | 806.97 | 50 | 1 | VFFDMTADNEPLGR  | 22d | 28 |
| FBgn0004432 | 570.22 | 67 | 1 | FPDENFELK       | 32d | 28 |
| FBgn0004432 | 813.95 | 89 | 2 | HVVFGEVVEGLDVVK | 32d | 28 |
| FBgn0004432 | 901.47 | 56 | 3 | SIYGNKFPDENFELK | 32d | 28 |
| FBgn0004432 | 806.88 | 51 | 2 | VFFDMTADNEPLGR  | 32d | 28 |
| FBgn0004432 | 813.78 | 77 | 2 | HVVFGEVVEGLDVVK | 36d | 28 |
| FBgn0004432 | 528.64 | 41 | 2 | IESYGSQSGK      | 36d | 28 |
| FBgn0004432 | 901.43 | 73 | 3 | SIYGNKFPDENFELK | 36d | 28 |
| FBgn0004432 | 807.11 | 47 | 1 | VFFDMTADNEPLGR  | 36d | 28 |
| FBgn0004432 | 570.22 | 64 | 1 | FPDENFELK       | 42d | 28 |
| FBgn0004432 | 813.82 | 91 | 3 | HVVFGEVVEGLDVVK | 42d | 28 |
| FBgn0004432 | 528.75 | 53 | 2 | IESYGSQSGK      | 42d | 28 |
| FBgn0004432 | 592.54 | 69 | 2 | KIESYGSQSGK     | 42d | 28 |
| FBgn0004432 | 901.51 | 57 | 1 | SIYGNKFPDENFELK | 42d | 28 |
| FBgn0004432 | 570.2  | 51 | 1 | FPDENFELK       | 46d | 28 |
| FBgn0004432 | 813.97 | 75 | 3 | HVVFGEVVEGLDVVK | 46d | 28 |
| FBgn0004432 | 901.25 | 64 | 3 | SIYGNKFPDENFELK | 46d | 28 |
| FBgn0004432 | 542.92 | 90 | 3 | HVVFGEVVEGLDVVK | 50d | 28 |
| FBgn0004432 | 901.5  | 48 | 1 | SIYGNKFPDENFELK | 50d | 28 |
| FBgn0004432 | 806.98 | 88 | 4 | VFFDMTADNEPLGR  | 50d | 28 |
| FBgn0004432 | 813.92 | 93 | 3 | HVVFGEVVEGLDVVK | 52d | 28 |
| FBgn0004432 | 901.61 | 35 | 1 | SIYGNKFPDENFELK | 52d | 28 |
| FBgn0004432 | 807    | 55 | 4 | VFFDMTADNEPLGR  | 52d | 28 |
| FBgn0004432 | 814.15 | 86 | 3 | HVVFGEVVEGLDVVK | 56d | 28 |
| FBgn0004432 | 592.85 | 53 | 3 | KIESYGSQSGK     | 56d | 28 |
| FBgn0004432 | 806.87 | 75 | 3 | VFFDMTADNEPLGR  | 56d | 28 |
| FBgn0004435 | 903.01 | 47 | 2 | IEQADYLPTEQDILR | 2d  | 18 |

|             |         |    |   |                     |      |    |
|-------------|---------|----|---|---------------------|------|----|
| FBgn0004435 | 1077.06 | 68 | 1 | VPTTGILEYPFDLDGIVFR | 2d   | 18 |
| FBgn0004435 | 903.13  | 50 | 2 | IEQADYLPTEQDILR     | 22d  | 18 |
| FBgn0004435 | 1077.27 | 42 | 1 | VPTTGILEYPFDLDGIVFR | 22d  | 18 |
| FBgn0004435 | 1038.21 | 44 | 2 | IMYSHLVDYFPEYDGPK   | 42d  | 18 |
| FBgn0004435 | 718.54  | 58 | 3 | VPTTGILEYPFDLDGIVFR | 42d  | 18 |
| FBgn0004435 | 1077.29 | 56 | 3 | VPTTGILEYPFDLDGIVFR | 62d  | 18 |
| FBgn0004435 | 903.21  | 44 | 1 | IEQADYLPTEQDILR     | 82d  | 18 |
| FBgn0004435 | 1077.32 | 68 | 2 | VPTTGILEYPFDLDGIVFR | 82d  | 18 |
| FBgn0004435 | 1076.06 | 62 | 1 | VPTTGILEYPFDLDGIVFR | 102d | 18 |
| FBgn0004435 | 1076.79 | 61 | 1 | VPTTGILEYPFDLDGIVFR | 112d | 18 |
| FBgn0004435 | 718.39  | 51 | 2 | VPTTGILEYPFDLDGIVFR | 122d | 18 |
| FBgn0004435 | 1038.01 | 51 | 1 | IMYSHLVDYFPEYDGPK   | 2d   | 28 |
| FBgn0004435 | 1077.07 | 45 | 1 | VPTTGILEYPFDLDGIVFR | 2d   | 28 |
| FBgn0004435 | 903.02  | 34 | 2 | IEQADYLPTEQDILR     | 12d  | 28 |
| FBgn0004435 | 1076.93 | 65 | 3 | VPTTGILEYPFDLDGIVFR | 12d  | 28 |
| FBgn0004435 | 903.09  | 42 | 1 | IEQADYLPTEQDILR     | 22d  | 28 |
| FBgn0004435 | 1077.02 | 65 | 2 | VPTTGILEYPFDLDGIVFR | 22d  | 28 |
| FBgn0004435 | 902.95  | 39 | 2 | IEQADYLPTEQDILR     | 32d  | 28 |
| FBgn0004435 | 1077.17 | 49 | 3 | VPTTGILEYPFDLDGIVFR | 32d  | 28 |
| FBgn0004435 | 903.16  | 38 | 1 | IEQADYLPTEQDILR     | 36d  | 28 |
| FBgn0004435 | 871.88  | 38 | 1 | TLWDDAGIQECYDR      | 36d  | 28 |
| FBgn0004435 | 1076.94 | 46 | 2 | VPTTGILEYPFDLDGIVFR | 36d  | 28 |
| FBgn0004435 | 902.93  | 39 | 2 | IEQADYLPTEQDILR     | 42d  | 28 |
| FBgn0004435 | 718.5   | 46 | 2 | VPTTGILEYPFDLDGIVFR | 42d  | 28 |
| FBgn0004435 | 902.67  | 52 | 2 | IEQADYLPTEQDILR     | 46d  | 28 |
| FBgn0004435 | 718.54  | 53 | 2 | VPTTGILEYPFDLDGIVFR | 46d  | 28 |
| FBgn0004435 | 718.31  | 56 | 3 | VPTTGILEYPFDLDGIVFR | 50d  | 28 |
| FBgn0004435 | 872     | 35 | 1 | TLWDDAGIQECYDR      | 52d  | 28 |
| FBgn0004435 | 1077.31 | 45 | 3 | VPTTGILEYPFDLDGIVFR | 52d  | 28 |
| FBgn0004435 | 902.94  | 45 | 1 | IEQADYLPTEQDILR     | 56d  | 28 |
| FBgn0004435 | 718.32  | 40 | 1 | VPTTGILEYPFDLDGIVFR | 56d  | 28 |
| FBgn0004493 | 618.46  | 34 | 1 | CAISLQLSMRQYVQR     | 2d   | 18 |



|             |         |     |   |                           |     |    |
|-------------|---------|-----|---|---------------------------|-----|----|
| FBgn0004507 | 688.05  | 35  | 1 | EIWGVEPTWEK               | 2d  | 18 |
| FBgn0004507 | 609.04  | 35  | 1 | GIAEVGNVTEVK              | 2d  | 18 |
| FBgn0004507 | 891.32  | 38  | 1 | GYNAYDYNNANPEVK           | 2d  | 18 |
| FBgn0004507 | 917.15  | 53  | 4 | IGDEWPVHLDQLVALK          | 2d  | 18 |
| FBgn0004507 | 1241.12 | 106 | 3 | IMPAADLSEQISTAGTEASGTGNMK | 2d  | 18 |
| FBgn0004507 | 656.12  | 67  | 1 | MSMVEEDGEKR               | 2d  | 18 |
| FBgn0004507 | 1112.04 | 55  | 1 | QVIDQIQGGFFSPGNPNEFK      | 2d  | 18 |
| FBgn0004507 | 931.43  | 42  | 1 | SCAYTNHTVLPALER           | 2d  | 18 |
| FBgn0004507 | 1059.99 | 56  | 2 | VAIQLNDTHPSLAPELMR        | 2d  | 18 |
| FBgn0004507 | 527.76  | 36  | 2 | VIFLENYR                  | 2d  | 18 |
| FBgn0004507 | 722.53  | 65  | 2 | VLYPNDNFFEGK              | 2d  | 18 |
| FBgn0004507 | 706.12  | 68  | 2 | WPVSLLESILPR              | 2d  | 18 |
| FBgn0004507 | 963.94  | 73  | 2 | YDHYYLLADYDAYIK           | 2d  | 18 |
| FBgn0004507 | 560.06  | 39  | 1 | YEGIFAQK                  | 2d  | 18 |
| FBgn0004507 | 687.42  | 51  | 2 | EIWGVEPTWEK               | 22d | 18 |
| FBgn0004507 | 837.57  | 58  | 1 | FFNDGDYIQAVLDR            | 22d | 18 |
| FBgn0004507 | 756.73  | 63  | 3 | ILVDEEHLTWEK              | 22d | 18 |
| FBgn0004507 | 949.49  | 53  | 3 | LICAVGNVVNNDPIVGDK        | 22d | 18 |
| FBgn0004507 | 794.24  | 62  | 1 | NGEQVEEPDDWLR             | 22d | 18 |
| FBgn0004507 | 1112.01 | 86  | 1 | QVIDQIQGGFFSPGNPNEFK      | 22d | 18 |
| FBgn0004507 | 1060.16 | 64  | 2 | VAIQLNDTHPSLAPELMR        | 22d | 18 |
| FBgn0004507 | 527.66  | 39  | 2 | VIFLENYR                  | 22d | 18 |
| FBgn0004507 | 687.62  | 47  | 1 | EIWGVEPTWEK               | 42d | 18 |
| FBgn0004507 | 837.45  | 68  | 2 | FFNDGDYIQAVLDR            | 42d | 18 |
| FBgn0004507 | 891.43  | 71  | 1 | GYNAYDYNNANPEVK           | 42d | 18 |
| FBgn0004507 | 917.49  | 57  | 3 | IGDEWPVHLDQLVALK          | 42d | 18 |
| FBgn0004507 | 1240.94 | 79  | 1 | IMPAADLSEQISTAGTEASGTGNMK | 42d | 18 |
| FBgn0004507 | 794.33  | 40  | 1 | NGEQVEEPDDWLR             | 42d | 18 |
| FBgn0004507 | 1111.96 | 60  | 2 | QVIDQIQGGFFSPGNPNEFK      | 42d | 18 |
| FBgn0004507 | 1060.27 | 75  | 3 | VAIQLNDTHPSLAPELMR        | 42d | 18 |
| FBgn0004507 | 705.97  | 86  | 3 | WPVSLLESILPR              | 42d | 18 |
| FBgn0004507 | 431.19  | 34  | 1 | AWDITVR                   | 62d | 18 |

|             |         |    |   |                      |      |    |
|-------------|---------|----|---|----------------------|------|----|
| FBgn0004507 | 687.98  | 47 | 3 | EIWGVEPTWEK          | 62d  | 18 |
| FBgn0004507 | 837.52  | 77 | 2 | FFNDGDYIQAVLDR       | 62d  | 18 |
| FBgn0004507 | 891.61  | 70 | 1 | GYNAYDYNNANPEVK      | 62d  | 18 |
| FBgn0004507 | 917.41  | 70 | 2 | IGDEWVPVHLDQLVALK    | 62d  | 18 |
| FBgn0004507 | 756.46  | 60 | 1 | ILVDEEHLTWEK         | 62d  | 18 |
| FBgn0004507 | 450.9   | 36 | 1 | NIADILLK             | 62d  | 18 |
| FBgn0004507 | 1112.19 | 87 | 1 | QVIDQIQGGFFSPGNPNEFK | 62d  | 18 |
| FBgn0004507 | 527.9   | 40 | 2 | VIFLENYR             | 62d  | 18 |
| FBgn0004507 | 705.75  | 86 | 2 | WPVSLLESILPR         | 62d  | 18 |
| FBgn0004507 | 447.83  | 39 | 1 | YGNPWEK              | 62d  | 18 |
| FBgn0004507 | 510.29  | 58 | 1 | DPTANFTPR            | 82d  | 18 |
| FBgn0004507 | 687.83  | 44 | 1 | EIWGVEPTWEK          | 82d  | 18 |
| FBgn0004507 | 837.09  | 68 | 2 | FFNDGDYIQAVLDR       | 82d  | 18 |
| FBgn0004507 | 917.28  | 53 | 3 | IGDEWVPVHLDQLVALK    | 82d  | 18 |
| FBgn0004507 | 756.94  | 64 | 3 | ILVDEEHLTWEK         | 82d  | 18 |
| FBgn0004507 | 561.36  | 39 | 1 | NTFDHFDPK            | 82d  | 18 |
| FBgn0004507 | 1112.22 | 47 | 1 | QVIDQIQGGFFSPGNPNEFK | 82d  | 18 |
| FBgn0004507 | 467.48  | 39 | 1 | SPIDFNLK             | 82d  | 18 |
| FBgn0004507 | 1059.14 | 35 | 1 | VAIQLNDTHPSLAIPELMR  | 82d  | 18 |
| FBgn0004507 | 527.87  | 38 | 1 | VIFLENYR             | 82d  | 18 |
| FBgn0004507 | 722.23  | 39 | 1 | VLYPNDNFFEGK         | 82d  | 18 |
| FBgn0004507 | 706.03  | 86 | 4 | WPVSLLESILPR         | 82d  | 18 |
| FBgn0004507 | 964.18  | 51 | 1 | YDHYYLLADYDAYIK      | 82d  | 18 |
| FBgn0004507 | 687.64  | 42 | 2 | EIWGVEPTWEK          | 102d | 18 |
| FBgn0004507 | 837.45  | 51 | 1 | FFNDGDYIQAVLDR       | 102d | 18 |
| FBgn0004507 | 756.89  | 68 | 1 | ILVDEEHLTWEK         | 102d | 18 |
| FBgn0004507 | 794.45  | 40 | 2 | NGEQVEEPDDWLR        | 102d | 18 |
| FBgn0004507 | 1112.01 | 76 | 2 | QVIDQIQGGFFSPGNPNEFK | 102d | 18 |
| FBgn0004507 | 722.56  | 49 | 1 | VLYPNDNFFEGK         | 102d | 18 |
| FBgn0004507 | 705.67  | 91 | 3 | WPVSLLESILPR         | 102d | 18 |
| FBgn0004507 | 687.78  | 47 | 2 | EIWGVEPTWEK          | 112d | 18 |
| FBgn0004507 | 837.4   | 73 | 1 | FFNDGDYIQAVLDR       | 112d | 18 |

|             |         |    |   |                           |      |    |
|-------------|---------|----|---|---------------------------|------|----|
| FBgn0004507 | 916.88  | 45 | 1 | IGDEWPVHLDQLVALK          | 112d | 18 |
| FBgn0004507 | 1060.13 | 49 | 1 | VAIQLNDTHPSLAIPELMR       | 112d | 18 |
| FBgn0004507 | 722.22  | 44 | 1 | VLYPNDNFFEGK              | 112d | 18 |
| FBgn0004507 | 705.57  | 92 | 3 | WPVSLLESILPR              | 112d | 18 |
| FBgn0004507 | 687.56  | 36 | 1 | EIWGVEPTWEK               | 122d | 18 |
| FBgn0004507 | 836.65  | 92 | 3 | FFNDGDYIQAVLDR            | 122d | 18 |
| FBgn0004507 | 917.64  | 43 | 1 | IGDEWPVHLDQLVALK          | 122d | 18 |
| FBgn0004507 | 1112.2  | 54 | 2 | QVIDQIQGGFFSPGNPNEFK      | 122d | 18 |
| FBgn0004507 | 527.8   | 40 | 1 | VIFLENYR                  | 122d | 18 |
| FBgn0004507 | 722.35  | 54 | 1 | VLYPNDNFFEGK              | 122d | 18 |
| FBgn0004507 | 706.03  | 86 | 3 | WPVSLLESILPR              | 122d | 18 |
| FBgn0004507 | 837.3   | 73 | 1 | FFNDGDYIQAVLDR            | 132d | 18 |
| FBgn0004507 | 612.04  | 39 | 2 | IGDEWPVHLDQLVALK          | 132d | 18 |
| FBgn0004507 | 756.81  | 62 | 1 | ILVDEEHLTWEK              | 132d | 18 |
| FBgn0004507 | 1241.3  | 57 | 1 | IMPAADLSEQISTAGTEASGTGNMK | 132d | 18 |
| FBgn0004507 | 467.96  | 36 | 1 | SPIDFNLK                  | 132d | 18 |
| FBgn0004507 | 705.79  | 98 | 2 | WPVSLLESILPR              | 132d | 18 |
| FBgn0004507 | 687.95  | 47 | 2 | EIWGVEPTWEK               | 142d | 18 |
| FBgn0004507 | 706.14  | 87 | 2 | WPVSLLESILPR              | 142d | 18 |
| FBgn0004507 | 510.09  | 51 | 3 | DPTANFTPR                 | 2d   | 28 |
| FBgn0004507 | 687.57  | 40 | 2 | EIWGVEPTWEK               | 2d   | 28 |
| FBgn0004507 | 837.47  | 92 | 3 | FFNDGDYIQAVLDR            | 2d   | 28 |
| FBgn0004507 | 608.8   | 64 | 2 | GIAEVGNVTEVK              | 2d   | 28 |
| FBgn0004507 | 917.31  | 50 | 2 | IGDEWPVHLDQLVALK          | 2d   | 28 |
| FBgn0004507 | 756.9   | 74 | 2 | ILVDEEHLTWEK              | 2d   | 28 |
| FBgn0004507 | 1240.94 | 85 | 1 | IMPAADLSEQISTAGTEASGTGNMK | 2d   | 28 |
| FBgn0004507 | 656     | 69 | 3 | MSMVEEDGEKR               | 2d   | 28 |
| FBgn0004507 | 450.67  | 38 | 1 | NIADILLK                  | 2d   | 28 |
| FBgn0004507 | 1112.03 | 86 | 2 | QVIDQIQGGFFSPGNPNEFK      | 2d   | 28 |
| FBgn0004507 | 1060    | 58 | 2 | VAIQLNDTHPSLAIPELMR       | 2d   | 28 |
| FBgn0004507 | 1274.13 | 61 | 2 | VFAMPYDNPIPGYNNNHVNTLR    | 2d   | 28 |
| FBgn0004507 | 527.78  | 35 | 2 | VIFLENYR                  | 2d   | 28 |

|             |         |     |   |                           |     |    |
|-------------|---------|-----|---|---------------------------|-----|----|
| FBgn0004507 | 722.24  | 47  | 4 | VLYPNDNFFEGK              | 2d  | 28 |
| FBgn0004507 | 705.94  | 92  | 3 | WPVSLLESILPR              | 2d  | 28 |
| FBgn0004507 | 964.09  | 60  | 2 | YDHYYLLADYDAYIK           | 2d  | 28 |
| FBgn0004507 | 893.66  | 42  | 1 | DSLFDHDFYEMEPQK           | 12d | 28 |
| FBgn0004507 | 687.95  | 47  | 2 | EIWGVEPTWEK               | 12d | 28 |
| FBgn0004507 | 837.36  | 79  | 4 | FFNDGDYIQAVLDR            | 12d | 28 |
| FBgn0004507 | 891.35  | 36  | 1 | GYNAYDYNNANPEVK           | 12d | 28 |
| FBgn0004507 | 917.22  | 56  | 2 | IGDEWPVHLDQLVALK          | 12d | 28 |
| FBgn0004507 | 1241.26 | 123 | 1 | IMPAADLSEQISTAGTEASGTGNMK | 12d | 28 |
| FBgn0004507 | 794.43  | 45  | 1 | NGEQVEEPDDWLR             | 12d | 28 |
| FBgn0004507 | 450.75  | 34  | 1 | NIADILLK                  | 12d | 28 |
| FBgn0004507 | 1111.77 | 90  | 3 | QVIDQIQGGFFSPGNPNEFK      | 12d | 28 |
| FBgn0004507 | 931.45  | 51  | 2 | SCAYTNHTVLPEALER          | 12d | 28 |
| FBgn0004507 | 1060.31 | 82  | 3 | VAIQLNDTHPSLAIPELMR       | 12d | 28 |
| FBgn0004507 | 527.53  | 44  | 1 | VIFLENYR                  | 12d | 28 |
| FBgn0004507 | 722.19  | 35  | 1 | VLYPNDNFFEGK              | 12d | 28 |
| FBgn0004507 | 705.99  | 88  | 3 | WPVSLLESILPR              | 12d | 28 |
| FBgn0004507 | 756.85  | 59  | 3 | ILVDEEHLTWEK              | 22d | 28 |
| FBgn0004507 | 1112.25 | 79  | 2 | QVIDQIQGGFFSPGNPNEFK      | 22d | 28 |
| FBgn0004507 | 1060.09 | 88  | 1 | VAIQLNDTHPSLAIPELMR       | 22d | 28 |
| FBgn0004507 | 894     | 36  | 1 | DSLFDHDFYEMEPQK           | 32d | 28 |
| FBgn0004507 | 687.59  | 42  | 2 | EIWGVEPTWEK               | 32d | 28 |
| FBgn0004507 | 837.31  | 74  | 2 | FFNDGDYIQAVLDR            | 32d | 28 |
| FBgn0004507 | 891.39  | 71  | 1 | GYNAYDYNNANPEVK           | 32d | 28 |
| FBgn0004507 | 756.89  | 62  | 3 | ILVDEEHLTWEK              | 32d | 28 |
| FBgn0004507 | 794.43  | 50  | 2 | NGEQVEEPDDWLR             | 32d | 28 |
| FBgn0004507 | 722.26  | 37  | 2 | VLYPNDNFFEGK              | 32d | 28 |
| FBgn0004507 | 893.72  | 34  | 1 | DSLFDHDFYEMEPQK           | 36d | 28 |
| FBgn0004507 | 687.42  | 34  | 1 | EIWGVEPTWEK               | 36d | 28 |
| FBgn0004507 | 837.24  | 86  | 1 | FFNDGDYIQAVLDR            | 36d | 28 |
| FBgn0004507 | 1112.06 | 58  | 1 | QVIDQIQGGFFSPGNPNEFK      | 36d | 28 |
| FBgn0004507 | 707.2   | 42  | 1 | VAIQLNDTHPSLAIPELMR       | 36d | 28 |

|             |         |     |   |                      |     |    |
|-------------|---------|-----|---|----------------------|-----|----|
| FBgn0004507 | 722.36  | 46  | 2 | VLYPNDNFFEGK         | 36d | 28 |
| FBgn0004507 | 893.88  | 38  | 1 | DSLFHDFYEMEPQK       | 42d | 28 |
| FBgn0004507 | 687.78  | 42  | 2 | EIWGVEPTWEK          | 42d | 28 |
| FBgn0004507 | 837.27  | 89  | 2 | FFNDGDYIQAVLDR       | 42d | 28 |
| FBgn0004507 | 722.47  | 46  | 2 | VLYPNDNFFEGK         | 42d | 28 |
| FBgn0004507 | 705.84  | 86  | 1 | WPVSLLESILPR         | 42d | 28 |
| FBgn0004507 | 688.06  | 42  | 1 | EIWGVEPTWEK          | 46d | 28 |
| FBgn0004507 | 837.49  | 62  | 1 | FFNDGDYIQAVLDR       | 46d | 28 |
| FBgn0004507 | 917.58  | 58  | 1 | IGDEWPVHLDQLVALK     | 46d | 28 |
| FBgn0004507 | 756.87  | 64  | 1 | ILVDEEHLTWEK         | 46d | 28 |
| FBgn0004507 | 707.21  | 40  | 1 | VAIQLNDTHPSLAIPELMR  | 46d | 28 |
| FBgn0004507 | 688.06  | 50  | 2 | EIWGVEPTWEK          | 50d | 28 |
| FBgn0004507 | 837.09  | 81  | 3 | FFNDGDYIQAVLDR       | 50d | 28 |
| FBgn0004507 | 612.11  | 36  | 2 | IGDEWPVHLDQLVALK     | 50d | 28 |
| FBgn0004507 | 756.91  | 34  | 1 | ILVDEEHLTWEK         | 50d | 28 |
| FBgn0004507 | 1111.71 | 56  | 1 | QVIDQIQGGFFSPGNPNEFK | 50d | 28 |
| FBgn0004507 | 722.43  | 37  | 1 | VLYPNDNFFEGK         | 50d | 28 |
| FBgn0004507 | 776.1   | 55  | 1 | WLEMSINNIASSGK       | 50d | 28 |
| FBgn0004507 | 705.73  | 73  | 1 | WPVSLLESILPR         | 50d | 28 |
| FBgn0004507 | 687.98  | 42  | 1 | EIWGVEPTWEK          | 52d | 28 |
| FBgn0004507 | 837.46  | 92  | 1 | FFNDGDYIQAVLDR       | 52d | 28 |
| FBgn0004507 | 612.13  | 42  | 2 | IGDEWPVHLDQLVALK     | 52d | 28 |
| FBgn0004507 | 1060.26 | 69  | 3 | VAIQLNDTHPSLAIPELMR  | 52d | 28 |
| FBgn0004507 | 705.64  | 105 | 1 | WPVSLLESILPR         | 52d | 28 |
| FBgn0004507 | 837.34  | 68  | 3 | FFNDGDYIQAVLDR       | 56d | 28 |
| FBgn0004507 | 722.2   | 47  | 1 | VLYPNDNFFEGK         | 56d | 28 |
| FBgn0004507 | 706.08  | 100 | 3 | WPVSLLESILPR         | 56d | 28 |
| FBgn0004516 | 578.08  | 43  | 2 | ADSVTWNPHK           | 2d  | 18 |
| FBgn0004516 | 908.04  | 79  | 1 | ALPLQQLIEDCATTLK     | 22d | 18 |
| FBgn0004516 | 581.22  | 44  | 1 | VIDVLLDFVK           | 42d | 18 |
| FBgn0004516 | 907.78  | 56  | 1 | ALPLQQLIEDCATTLK     | 62d | 18 |
| FBgn0004516 | 581.46  | 49  | 1 | VIDVLLDFVK           | 62d | 18 |

|             |         |    |   |                       |      |    |
|-------------|---------|----|---|-----------------------|------|----|
| FBgn0004516 | 908.1   | 53 | 1 | ALPLQQLIEDCATTLK      | 82d  | 18 |
| FBgn0004516 | 528.69  | 63 | 1 | LLDLDPDR              | 82d  | 18 |
| FBgn0004516 | 1216.95 | 36 | 1 | SISSAAVNEADVDFMLDEIHR | 82d  | 18 |
| FBgn0004516 | 581.53  | 44 | 1 | VIDVLLDFVK            | 82d  | 18 |
| FBgn0004516 | 908.18  | 50 | 2 | ALPLQQLIEDCATTLK      | 102d | 18 |
| FBgn0004516 | 969.73  | 44 | 1 | LTAYDLMPTTVTAGPETR    | 112d | 18 |
| FBgn0004516 | 907.72  | 51 | 2 | ALPLQQLIEDCATTLK      | 132d | 18 |
| FBgn0004516 | 1217.3  | 42 | 1 | SISSAAVNEADVDFMLDEIHR | 132d | 18 |
| FBgn0004516 | 969.68  | 41 | 1 | LTAYDLMPTTVTAGPETR    | 142d | 18 |
| FBgn0004516 | 908.08  | 60 | 1 | ALPLQQLIEDCATTLK      | 2d   | 28 |
| FBgn0004516 | 969.64  | 64 | 1 | LTAYDLMPTTVTAGPETR    | 2d   | 28 |
| FBgn0004516 | 1216.64 | 46 | 1 | SISSAAVNEADVDFMLDEIHR | 2d   | 28 |
| FBgn0004516 | 581.56  | 49 | 2 | VIDVLLDFVK            | 2d   | 28 |
| FBgn0004516 | 908.01  | 45 | 1 | ALPLQQLIEDCATTLK      | 12d  | 28 |
| FBgn0004516 | 969.71  | 53 | 1 | LTAYDLMPTTVTAGPETR    | 12d  | 28 |
| FBgn0004516 | 969.68  | 50 | 2 | LTAYDLMPTTVTAGPETR    | 32d  | 28 |
| FBgn0004516 | 811.82  | 45 | 1 | SISSAAVNEADVDFMLDEIHR | 32d  | 28 |
| FBgn0004516 | 969.48  | 41 | 1 | LTAYDLMPTTVTAGPETR    | 36d  | 28 |
| FBgn0004516 | 676.81  | 34 | 1 | GTLMVGYQPDDR          | 42d  | 28 |
| FBgn0004516 | 969.52  | 52 | 3 | LTAYDLMPTTVTAGPETR    | 42d  | 28 |
| FBgn0004516 | 969.24  | 74 | 3 | LTAYDLMPTTVTAGPETR    | 46d  | 28 |
| FBgn0004516 | 907.95  | 56 | 1 | ALPLQQLIEDCATTLK      | 50d  | 28 |
| FBgn0004516 | 969.36  | 40 | 1 | LTAYDLMPTTVTAGPETR    | 50d  | 28 |
| FBgn0004516 | 908.07  | 65 | 2 | ALPLQQLIEDCATTLK      | 52d  | 28 |
| FBgn0004516 | 908.22  | 42 | 1 | ALPLQQLIEDCATTLK      | 56d  | 28 |
| FBgn0004516 | 969.52  | 41 | 2 | LTAYDLMPTTVTAGPETR    | 56d  | 28 |
| FBgn0004516 | 581.42  | 56 | 3 | VIDVLLDFVK            | 56d  | 28 |
| FBgn0004551 | 1111.49 | 59 | 2 | EIVPGDLVEVSVGDKIPADIR | 2d   | 18 |
| FBgn0004551 | 655.36  | 40 | 1 | EFDDLSPTEQK           | 22d  | 18 |
| FBgn0004551 | 625.97  | 62 | 1 | ILALTGQYGTGR          | 22d  | 18 |
| FBgn0004551 | 737.9   | 69 | 2 | FSIPVVLLDETLK         | 42d  | 18 |
| FBgn0004551 | 795.3   | 72 | 2 | IDQSILTGESVSVIK       | 42d  | 18 |

|             |         |    |   |                            |      |    |
|-------------|---------|----|---|----------------------------|------|----|
| FBgn0004551 | 871.11  | 47 | 2 | TVEQSLNFFGTDPER            | 42d  | 18 |
| FBgn0004551 | 1111.65 | 48 | 2 | EIVPGDLVEVSVGDKIPADIR      | 82d  | 18 |
| FBgn0004551 | 738.03  | 49 | 2 | FSIPVVLLDETLK              | 102d | 18 |
| FBgn0004551 | 795.47  | 69 | 2 | IDQSILTGESVSVIK            | 102d | 18 |
| FBgn0004551 | 737.96  | 45 | 1 | FSIPVVLLDETLK              | 112d | 18 |
| FBgn0004551 | 870.88  | 36 | 1 | TVEQSLNFFGTDPER            | 112d | 18 |
| FBgn0004551 | 1111.72 | 36 | 1 | EIVPGDLVEVSVGDKIPADIR      | 122d | 18 |
| FBgn0004551 | 655.26  | 39 | 1 | EFDDLSPTEQK                | 2d   | 28 |
| FBgn0004551 | 737.93  | 44 | 1 | FSIPVVLLDETLK              | 2d   | 28 |
| FBgn0004551 | 795.48  | 48 | 1 | IDQSILTGESVSVIK            | 2d   | 28 |
| FBgn0004551 | 691.89  | 66 | 1 | IGVFAEDEDTTGK              | 2d   | 28 |
| FBgn0004551 | 655.12  | 50 | 2 | EFDDLSPTEQK                | 12d  | 28 |
| FBgn0004551 | 1111.49 | 61 | 3 | EIVPGDLVEVSVGDKIPADIR      | 12d  | 28 |
| FBgn0004551 | 738.04  | 44 | 2 | FSIPVVLLDETLK              | 12d  | 28 |
| FBgn0004551 | 795.38  | 73 | 2 | IDQSILTGESVSVIK            | 12d  | 28 |
| FBgn0004551 | 691.79  | 58 | 2 | IGVFAEDEDTTGK              | 12d  | 28 |
| FBgn0004551 | 625.98  | 72 | 1 | ILALTGQYGTGR               | 12d  | 28 |
| FBgn0004551 | 871.08  | 46 | 1 | TVEQSLNFFGTDPER            | 12d  | 28 |
| FBgn0004551 | 795.38  | 72 | 1 | IDQSILTGESVSVIK            | 50d  | 28 |
| FBgn0004551 | 625.67  | 36 | 1 | ILALTGQYGTGR               | 52d  | 28 |
| FBgn0004574 | 1414.9  | 61 | 1 | NWEVLVGSSHILSPEIFLSDLGSLSK | 2d   | 18 |
| FBgn0004574 | 895.16  | 79 | 2 | NIVPILLDANVSNYDK           | 42d  | 18 |
| FBgn0004574 | 479.59  | 36 | 1 | SQLLILDR                   | 132d | 18 |
| FBgn0004574 | 797.15  | 74 | 3 | VEQDLAMGTDAEGEK            | 2d   | 28 |
| FBgn0004574 | 894.85  | 98 | 2 | NIVPILLDANVSNYDK           | 56d  | 28 |
| FBgn0004575 | 1027.75 | 38 | 1 | DITVVSSADTGPVVTMAAYR       | 2d   | 18 |
| FBgn0004575 | 1073.43 | 41 | 1 | SSISEVPEEPSSSGPSTVGGVR     | 2d   | 18 |
| FBgn0004575 | 1027.47 | 78 | 1 | DITVVSSADTGPVVTMAAYR       | 42d  | 18 |
| FBgn0004575 | 889.77  | 34 | 1 | DGFPLIEQTFPNPR             | 62d  | 18 |
| FBgn0004575 | 1073.49 | 60 | 2 | SSISEVPEEPSSSGPSTVGGVR     | 82d  | 18 |
| FBgn0004575 | 889.86  | 41 | 2 | DGFPLIEQTFPNPR             | 122d | 18 |
| FBgn0004575 | 906.39  | 50 | 1 | AGAGYQPVTNYEQQER           | 132d | 18 |

|             |         |    |   |                           |      |    |
|-------------|---------|----|---|---------------------------|------|----|
| FBgn0004575 | 889.9   | 38 | 2 | DGFPLIEQTFPPNPR           | 142d | 18 |
| FBgn0004575 | 837.53  | 53 | 2 | DQGASILGAAVQSATQR         | 142d | 18 |
| FBgn0004575 | 906.02  | 45 | 1 | AGAGYQPVTNYEQQER          | 2d   | 28 |
| FBgn0004575 | 889.8   | 38 | 1 | DGFPLIEQTFPPNPR           | 2d   | 28 |
| FBgn0004575 | 837.64  | 58 | 1 | DQGASILGAAVQSATQR         | 2d   | 28 |
| FBgn0004575 | 1073.37 | 79 | 2 | SSISEVPEEPSSSGPSTVGGVR    | 2d   | 28 |
| FBgn0004575 | 525.62  | 45 | 3 | TPATAAPAPPR               | 2d   | 28 |
| FBgn0004575 | 906.51  | 55 | 1 | AGAGYQPVTNYEQQER          | 12d  | 28 |
| FBgn0004575 | 889.58  | 61 | 1 | DGFPLIEQTFPPNPR           | 22d  | 28 |
| FBgn0004575 | 889.99  | 40 | 1 | DGFPLIEQTFPPNPR           | 36d  | 28 |
| FBgn0004575 | 889.98  | 47 | 1 | DGFPLIEQTFPPNPR           | 42d  | 28 |
| FBgn0004580 | 931.82  | 49 | 2 | EYDTDNSGYIEADELK          | 2d   | 18 |
| FBgn0004580 | 931.79  | 94 | 3 | EYDTDNSGYIEADELK          | 22d  | 18 |
| FBgn0004580 | 1349.68 | 38 | 1 | EFVSSANATDISPEAVTDTMLEELK | 42d  | 18 |
| FBgn0004580 | 772.46  | 80 | 3 | FDNPLESSVEFMK             | 42d  | 18 |
| FBgn0004580 | 1066.44 | 85 | 3 | KDDYDAQDLAAFEETIMR        | 42d  | 18 |
| FBgn0004580 | 931.73  | 63 | 1 | EYDTDNSGYIEADELK          | 62d  | 18 |
| FBgn0004580 | 1349.76 | 37 | 1 | EFVSSANATDISPEAVTDTMLEELK | 82d  | 18 |
| FBgn0004580 | 931.93  | 63 | 1 | EYDTDNSGYIEADELK          | 82d  | 18 |
| FBgn0004580 | 711.49  | 56 | 2 | KDDYDAQDLAAFEETIMR        | 82d  | 18 |
| FBgn0004580 | 711.26  | 56 | 2 | KDDYDAQDLAAFEETIMR        | 102d | 18 |
| FBgn0004580 | 710.81  | 54 | 2 | KDDYDAQDLAAFEETIMR        | 112d | 18 |
| FBgn0004580 | 524.85  | 41 | 1 | KINDVSEDK                 | 112d | 18 |
| FBgn0004580 | 900.23  | 54 | 1 | EFVSSANATDISPEAVTDTMLEELK | 122d | 18 |
| FBgn0004580 | 1349.73 | 54 | 1 | EFVSSANATDISPEAVTDTMLEELK | 132d | 18 |
| FBgn0004580 | 931.91  | 85 | 1 | EYDTDNSGYIEADELK          | 132d | 18 |
| FBgn0004580 | 1066.52 | 94 | 1 | KDDYDAQDLAAFEETIMR        | 132d | 18 |
| FBgn0004580 | 1066.69 | 89 | 2 | KDDYDAQDLAAFEETIMR        | 142d | 18 |
| FBgn0004580 | 1349.81 | 70 | 2 | EFVSSANATDISPEAVTDTMLEELK | 2d   | 28 |
| FBgn0004580 | 931.82  | 82 | 3 | EYDTDNSGYIEADELK          | 2d   | 28 |
| FBgn0004580 | 772.33  | 52 | 3 | FDNPLESSVEFMK             | 2d   | 28 |
| FBgn0004580 | 1066.58 | 72 | 3 | KDDYDAQDLAAFEETIMR        | 2d   | 28 |



|             |         |     |   |                           |      |    |
|-------------|---------|-----|---|---------------------------|------|----|
| FBgn0004580 | 931.72  | 79  | 2 | EYDTDNSGYIEADELK          | 12d  | 28 |
| FBgn0004580 | 772.23  | 50  | 1 | FDNPLESSVEFMK             | 12d  | 28 |
| FBgn0004580 | 1066.23 | 65  | 2 | KDDYDAQDLAAFEETIMR        | 12d  | 28 |
| FBgn0004580 | 931.92  | 72  | 1 | EYDTDNSGYIEADELK          | 22d  | 28 |
| FBgn0004580 | 1115.49 | 39  | 1 | VFSLYDRDNSGTIENEELK       | 22d  | 28 |
| FBgn0004580 | 1349.66 | 47  | 1 | EFVSSANATDISPEAVTDTMLEELK | 32d  | 28 |
| FBgn0004580 | 931.59  | 78  | 2 | EYDTDNSGYIEADELK          | 32d  | 28 |
| FBgn0004580 | 772.48  | 48  | 1 | FDNPLESSVEFMK             | 32d  | 28 |
| FBgn0004580 | 1349.59 | 67  | 2 | EFVSSANATDISPEAVTDTMLEELK | 36d  | 28 |
| FBgn0004580 | 931.82  | 71  | 2 | EYDTDNSGYIEADELK          | 36d  | 28 |
| FBgn0004580 | 772.2   | 71  | 2 | FDNPLESSVEFMK             | 36d  | 28 |
| FBgn0004580 | 931.77  | 117 | 3 | EYDTDNSGYIEADELK          | 42d  | 28 |
| FBgn0004580 | 772.39  | 77  | 1 | FDNPLESSVEFMK             | 42d  | 28 |
| FBgn0004580 | 1349.64 | 42  | 1 | EFVSSANATDISPEAVTDTMLEELK | 46d  | 28 |
| FBgn0004580 | 931.8   | 76  | 3 | EYDTDNSGYIEADELK          | 46d  | 28 |
| FBgn0004580 | 772.5   | 67  | 2 | FDNPLESSVEFMK             | 46d  | 28 |
| FBgn0004580 | 931.9   | 91  | 3 | EYDTDNSGYIEADELK          | 50d  | 28 |
| FBgn0004580 | 772.38  | 42  | 1 | FDNPLESSVEFMK             | 50d  | 28 |
| FBgn0004580 | 1066.67 | 51  | 1 | KDDYDAQDLAAFEETIMR        | 50d  | 28 |
| FBgn0004580 | 1349.66 | 69  | 1 | EFVSSANATDISPEAVTDTMLEELK | 52d  | 28 |
| FBgn0004580 | 1066.52 | 76  | 1 | KDDYDAQDLAAFEETIMR        | 52d  | 28 |
| FBgn0004580 | 1349.41 | 56  | 2 | EFVSSANATDISPEAVTDTMLEELK | 56d  | 28 |
| FBgn0004580 | 772.49  | 58  | 1 | FDNPLESSVEFMK             | 56d  | 28 |
| FBgn0004587 | 645.6   | 45  | 2 | QAGEVTYADAHK              | 2d   | 28 |
| FBgn0004611 | 1047.05 | 82  | 1 | DYVPDDLNSNFAEALANPIK      | 62d  | 18 |
| FBgn0004611 | 1046.9  | 98  | 1 | DYVPDDLNSNFAEALANPIK      | 132d | 18 |
| FBgn0004623 | 758.89  | 50  | 2 | ADQQIAQYEPPOK             | 2d   | 18 |
| FBgn0004623 | 803.91  | 56  | 1 | FLDDGHLITGSGDMK           | 2d   | 18 |
| FBgn0004623 | 662.92  | 45  | 1 | LYDEINGMIQK               | 2d   | 18 |
| FBgn0004623 | 758.86  | 51  | 2 | ADQQIAQYEPPOK             | 22d  | 18 |
| FBgn0004623 | 662.73  | 67  | 1 | LYDEINGMIQK               | 22d  | 18 |
| FBgn0004623 | 758.82  | 43  | 1 | ADQQIAQYEPPOK             | 42d  | 18 |

|             |        |     |   |                 |      |    |
|-------------|--------|-----|---|-----------------|------|----|
| FBgn0004623 | 420.11 | 35  | 1 | VQIPLR          | 42d  | 18 |
| FBgn0004623 | 758.75 | 46  | 3 | ADQQIAQYEPQK    | 62d  | 18 |
| FBgn0004623 | 758.98 | 44  | 1 | ADQQIAQYEPQK    | 82d  | 18 |
| FBgn0004623 | 595.39 | 50  | 3 | VNSVHFAGDSR     | 82d  | 18 |
| FBgn0004623 | 758.96 | 48  | 1 | ADQQIAQYEPQK    | 102d | 18 |
| FBgn0004623 | 803.63 | 40  | 1 | FLDDGHLITGSGDMK | 102d | 18 |
| FBgn0004623 | 403.7  | 53  | 1 | HTGTLSGHENR     | 102d | 18 |
| FBgn0004623 | 758.83 | 40  | 1 | ADQQIAQYEPQK    | 112d | 18 |
| FBgn0004623 | 605.53 | 70  | 2 | HTGTLSGHENR     | 112d | 18 |
| FBgn0004623 | 758.92 | 40  | 2 | ADQQIAQYEPQK    | 122d | 18 |
| FBgn0004623 | 804.07 | 62  | 1 | FLDDGHLITGSGDMK | 122d | 18 |
| FBgn0004623 | 758.89 | 39  | 1 | ADQQIAQYEPQK    | 132d | 18 |
| FBgn0004623 | 803.89 | 71  | 2 | FLDDGHLITGSGDMK | 132d | 18 |
| FBgn0004623 | 403.8  | 40  | 2 | HTGTLSGHENR     | 132d | 18 |
| FBgn0004623 | 758.85 | 45  | 4 | ADQQIAQYEPQK    | 2d   | 28 |
| FBgn0004623 | 804.07 | 70  | 2 | FLDDGHLITGSGDMK | 2d   | 28 |
| FBgn0004623 | 663    | 67  | 3 | LYDEINGMIQK     | 2d   | 28 |
| FBgn0004623 | 758.95 | 47  | 2 | ADQQIAQYEPQK    | 12d  | 28 |
| FBgn0004623 | 803.79 | 106 | 2 | FLDDGHLITGSGDMK | 12d  | 28 |
| FBgn0004623 | 662.71 | 46  | 1 | LYDEINGMIQK     | 12d  | 28 |
| FBgn0004623 | 803.98 | 54  | 2 | FLDDGHLITGSGDMK | 22d  | 28 |
| FBgn0004623 | 758.64 | 42  | 1 | ADQQIAQYEPQK    | 32d  | 28 |
| FBgn0004623 | 803.79 | 82  | 3 | FLDDGHLITGSGDMK | 32d  | 28 |
| FBgn0004623 | 662.8  | 77  | 1 | LYDEINGMIQK     | 32d  | 28 |
| FBgn0004623 | 758.68 | 52  | 2 | ADQQIAQYEPQK    | 36d  | 28 |
| FBgn0004623 | 775.51 | 54  | 2 | ELMGYEGFLSSCR   | 36d  | 28 |
| FBgn0004623 | 804.13 | 53  | 1 | FLDDGHLITGSGDMK | 36d  | 28 |
| FBgn0004623 | 662.67 | 69  | 1 | LYDEINGMIQK     | 36d  | 28 |
| FBgn0004623 | 758.74 | 48  | 3 | ADQQIAQYEPQK    | 42d  | 28 |
| FBgn0004623 | 775.26 | 37  | 1 | ELMGYEGFLSSCR   | 42d  | 28 |
| FBgn0004623 | 403.86 | 41  | 1 | HTGTLSGHENR     | 42d  | 28 |
| FBgn0004623 | 662.93 | 74  | 3 | LYDEINGMIQK     | 42d  | 28 |

|             |         |    |   |                     |      |    |
|-------------|---------|----|---|---------------------|------|----|
| FBgn0004623 | 803.81  | 60 | 2 | FLDDGHLITGSGDMK     | 46d  | 28 |
| FBgn0004623 | 662.87  | 56 | 1 | LYDEINGMIQK         | 46d  | 28 |
| FBgn0004623 | 758.77  | 48 | 1 | ADQQIAQYEPPOK       | 50d  | 28 |
| FBgn0004623 | 804.04  | 75 | 3 | FLDDGHLITGSGDMK     | 50d  | 28 |
| FBgn0004623 | 662.75  | 67 | 1 | LYDEINGMIQK         | 50d  | 28 |
| FBgn0004623 | 758.73  | 42 | 1 | ADQQIAQYEPPOK       | 52d  | 28 |
| FBgn0004623 | 775.2   | 52 | 1 | ELMGYEGFLSSCR       | 52d  | 28 |
| FBgn0004623 | 803.94  | 68 | 2 | FLDDGHLITGSGDMK     | 52d  | 28 |
| FBgn0004623 | 758.82  | 56 | 2 | ADQQIAQYEPPOK       | 56d  | 28 |
| FBgn0004624 | 1049.47 | 67 | 2 | AGAYDYPSEWDTVTPEAK  | 2d   | 18 |
| FBgn0004624 | 671.38  | 47 | 1 | DLKPENLLLASK        | 2d   | 18 |
| FBgn0004624 | 1058.22 | 46 | 1 | ITEQLIEAINSGDFDGYTK | 2d   | 18 |
| FBgn0004624 | 1049.68 | 49 | 2 | AGAYDYPSEWDTVTPEAK  | 22d  | 18 |
| FBgn0004624 | 559.05  | 39 | 1 | FYFENVLGK           | 22d  | 18 |
| FBgn0004624 | 1057.97 | 56 | 3 | ITEQLIEAINSGDFDGYTK | 42d  | 18 |
| FBgn0004624 | 1049.29 | 69 | 2 | AGAYDYPSEWDTVTPEAK  | 82d  | 18 |
| FBgn0004624 | 1049.43 | 71 | 3 | AGAYDYPSEWDTVTPEAK  | 102d | 18 |
| FBgn0004624 | 1049.63 | 67 | 2 | AGAYDYPSEWDTVTPEAK  | 112d | 18 |
| FBgn0004624 | 1049.36 | 82 | 3 | AGAYDYPSEWDTVTPEAK  | 122d | 18 |
| FBgn0004624 | 671.45  | 38 | 1 | DLKPENLLLASK        | 132d | 18 |
| FBgn0004624 | 559.38  | 41 | 1 | FYFENVLGK           | 132d | 18 |
| FBgn0004624 | 1049.61 | 73 | 3 | AGAYDYPSEWDTVTPEAK  | 142d | 18 |
| FBgn0004624 | 558.96  | 35 | 1 | FYFENVLGK           | 142d | 18 |
| FBgn0004624 | 1049.34 | 71 | 3 | AGAYDYPSEWDTVTPEAK  | 2d   | 28 |
| FBgn0004624 | 671.28  | 47 | 2 | DLKPENLLLASK        | 2d   | 28 |
| FBgn0004624 | 1057.97 | 69 | 1 | ITEQLIEAINSGDFDGYTK | 2d   | 28 |
| FBgn0004624 | 1049.29 | 56 | 2 | AGAYDYPSEWDTVTPEAK  | 12d  | 28 |
| FBgn0004624 | 1049.17 | 61 | 2 | AGAYDYPSEWDTVTPEAK  | 22d  | 28 |
| FBgn0004624 | 1049.38 | 71 | 2 | AGAYDYPSEWDTVTPEAK  | 32d  | 28 |
| FBgn0004624 | 1049.45 | 50 | 2 | AGAYDYPSEWDTVTPEAK  | 36d  | 28 |
| FBgn0004624 | 559.44  | 46 | 1 | FYFENVLGK           | 36d  | 28 |
| FBgn0004624 | 1057.94 | 47 | 1 | ITEQLIEAINSGDFDGYTK | 36d  | 28 |

|             |         |    |   |                       |      |    |
|-------------|---------|----|---|-----------------------|------|----|
| FBgn0004624 | 1049.71 | 58 | 3 | AGAYDYPSPEWDTVTPEAK   | 42d  | 28 |
| FBgn0004624 | 1058.16 | 45 | 1 | ITEQLIEAINSGDFDGYTK   | 42d  | 28 |
| FBgn0004624 | 1049.36 | 58 | 2 | AGAYDYPSPEWDTVTPEAK   | 46d  | 28 |
| FBgn0004624 | 1049.43 | 64 | 3 | AGAYDYPSPEWDTVTPEAK   | 50d  | 28 |
| FBgn0004624 | 1057.99 | 85 | 2 | ITEQLIEAINSGDFDGYTK   | 52d  | 28 |
| FBgn0004624 | 1058.05 | 42 | 1 | ITEQLIEAINSGDFDGYTK   | 56d  | 28 |
| FBgn0004625 | 1111.88 | 87 | 2 | DFDPFADAPVDGVIAAQCSVK | 2d   | 18 |
| FBgn0004625 | 927.93  | 60 | 1 | KEPPLVFEPVTLESLR      | 2d   | 18 |
| FBgn0004625 | 928.05  | 37 | 1 | KEPPLVFEPVTLESLR      | 22d  | 18 |
| FBgn0004625 | 1089.91 | 41 | 1 | LVANNGLNPVYNEDPFVFR   | 22d  | 18 |
| FBgn0004625 | 1112.27 | 78 | 2 | DFDPFADAPVDGVIAAQCSVK | 42d  | 18 |
| FBgn0004625 | 928.01  | 58 | 3 | KEPPLVFEPVTLESLR      | 42d  | 18 |
| FBgn0004625 | 1090    | 70 | 3 | LVANNGLNPVYNEDPFVFR   | 42d  | 18 |
| FBgn0004625 | 705.94  | 66 | 2 | NDIEELFTSITK          | 42d  | 18 |
| FBgn0004625 | 1111.89 | 85 | 1 | DFDPFADAPVDGVIAAQCSVK | 62d  | 18 |
| FBgn0004625 | 658.91  | 34 | 1 | ILPLDGLQAGYR          | 62d  | 18 |
| FBgn0004625 | 928.11  | 37 | 2 | KEPPLVFEPVTLESLR      | 62d  | 18 |
| FBgn0004625 | 928.03  | 38 | 1 | KEPPLVFEPVTLESLR      | 82d  | 18 |
| FBgn0004625 | 1112.23 | 67 | 2 | DFDPFADAPVDGVIAAQCSVK | 112d | 18 |
| FBgn0004625 | 1111.64 | 71 | 2 | DFDPFADAPVDGVIAAQCSVK | 122d | 18 |
| FBgn0004625 | 1111.31 | 88 | 3 | DFDPFADAPVDGVIAAQCSVK | 2d   | 28 |
| FBgn0004625 | 618.94  | 39 | 2 | KEPPLVFEPVTLESLR      | 2d   | 28 |
| FBgn0004625 | 1089.84 | 48 | 2 | LVANNGLNPVYNEDPFVFR   | 2d   | 28 |
| FBgn0004625 | 548.49  | 36 | 1 | VVLPDLAVLR            | 2d   | 28 |
| FBgn0004625 | 836.04  | 41 | 1 | YLMSDENAPVFLDR        | 2d   | 28 |
| FBgn0004625 | 863.81  | 34 | 1 | EPPLVFEPVTLESLR       | 12d  | 28 |
| FBgn0004625 | 928.02  | 55 | 2 | KEPPLVFEPVTLESLR      | 12d  | 28 |
| FBgn0004625 | 706.06  | 37 | 1 | NDIEELFTSITK          | 12d  | 28 |
| FBgn0004625 | 1089.96 | 59 | 3 | LVANNGLNPVYNEDPFVFR   | 22d  | 28 |
| FBgn0004625 | 658.95  | 57 | 2 | ILPLDGLQAGYR          | 32d  | 28 |
| FBgn0004625 | 1111.88 | 81 | 2 | DFDPFADAPVDGVIAAQCSVK | 36d  | 28 |
| FBgn0004625 | 658.88  | 40 | 1 | ILPLDGLQAGYR          | 36d  | 28 |

|             |         |     |   |                                |      |    |
|-------------|---------|-----|---|--------------------------------|------|----|
| FBgn0004625 | 1112.05 | 99  | 2 | DFDPFADAPVDGVIAAQCSVK          | 42d  | 28 |
| FBgn0004625 | 1090.21 | 79  | 1 | LVANNGLNPVYNEDPFVFR            | 42d  | 28 |
| FBgn0004625 | 658.82  | 50  | 2 | ILPLDGLQAGYR                   | 50d  | 28 |
| FBgn0004625 | 1112    | 98  | 3 | DFDPFADAPVDGVIAAQCSVK          | 52d  | 28 |
| FBgn0004625 | 1111.87 | 73  | 2 | DFDPFADAPVDGVIAAQCSVK          | 56d  | 28 |
| FBgn0004625 | 1090.18 | 65  | 2 | LVANNGLNPVYNEDPFVFR            | 56d  | 28 |
| FBgn0004629 | 1138.87 | 49  | 2 | EALELLDATLAQLATGDGPSYK         | 2d   | 18 |
| FBgn0004629 | 1203.36 | 96  | 3 | KEALELLDATLAQLATGDGPSYK        | 2d   | 18 |
| FBgn0004629 | 1203.15 | 90  | 1 | KEALELLDATLAQLATGDGPSYK        | 22d  | 18 |
| FBgn0004629 | 1037.34 | 57  | 1 | AINVTSVTGQVVAGSLNTYEVELDNGSDKK | 42d  | 18 |
| FBgn0004629 | 1139.31 | 68  | 2 | EALELLDATLAQLATGDGPSYK         | 42d  | 18 |
| FBgn0004629 | 1202.97 | 114 | 3 | KEALELLDATLAQLATGDGPSYK        | 42d  | 18 |
| FBgn0004629 | 1139.32 | 62  | 2 | EALELLDATLAQLATGDGPSYK         | 62d  | 18 |
| FBgn0004629 | 1138.9  | 64  | 2 | EALELLDATLAQLATGDGPSYK         | 82d  | 18 |
| FBgn0004629 | 1203.19 | 104 | 2 | KEALELLDATLAQLATGDGPSYK        | 82d  | 18 |
| FBgn0004629 | 1037.17 | 80  | 1 | AINVTSVTGQVVAGSLNTYEVELDNGSDKK | 102d | 18 |
| FBgn0004629 | 1138.97 | 50  | 1 | EALELLDATLAQLATGDGPSYK         | 102d | 18 |
| FBgn0004629 | 802.53  | 43  | 1 | KEALELLDATLAQLATGDGPSYK        | 102d | 18 |
| FBgn0004629 | 759.21  | 55  | 2 | EALELLDATLAQLATGDGPSYK         | 112d | 18 |
| FBgn0004629 | 1203.19 | 94  | 3 | KEALELLDATLAQLATGDGPSYK        | 112d | 18 |
| FBgn0004629 | 759.45  | 72  | 3 | EALELLDATLAQLATGDGPSYK         | 122d | 18 |
| FBgn0004629 | 1202    | 77  | 1 | KEALELLDATLAQLATGDGPSYK        | 122d | 18 |
| FBgn0004629 | 1202.72 | 80  | 1 | KEALELLDATLAQLATGDGPSYK        | 132d | 18 |
| FBgn0004629 | 759.88  | 65  | 3 | EALELLDATLAQLATGDGPSYK         | 142d | 18 |
| FBgn0004629 | 1203.12 | 103 | 2 | KEALELLDATLAQLATGDGPSYK        | 142d | 18 |
| FBgn0004629 | 759.69  | 36  | 1 | EALELLDATLAQLATGDGPSYK         | 2d   | 28 |
| FBgn0004629 | 536.76  | 38  | 1 | IWTQPWLK                       | 2d   | 28 |
| FBgn0004629 | 759.7   | 40  | 1 | EALELLDATLAQLATGDGPSYK         | 12d  | 28 |
| FBgn0004629 | 1203.07 | 113 | 3 | KEALELLDATLAQLATGDGPSYK        | 12d  | 28 |
| FBgn0004629 | 759.87  | 58  | 1 | EALELLDATLAQLATGDGPSYK         | 32d  | 28 |
| FBgn0004629 | 1203.06 | 71  | 1 | KEALELLDATLAQLATGDGPSYK        | 32d  | 28 |
| FBgn0004629 | 759.68  | 55  | 3 | EALELLDATLAQLATGDGPSYK         | 36d  | 28 |

|             |         |     |   |                                |      |    |
|-------------|---------|-----|---|--------------------------------|------|----|
| FBgn0004629 | 1139.23 | 53  | 3 | EALELLDATLAQLATGDGPSYK         | 42d  | 28 |
| FBgn0004629 | 1202.99 | 93  | 2 | KEALELLDATLAQLATGDGPSYK        | 42d  | 28 |
| FBgn0004629 | 1139.1  | 75  | 2 | EALELLDATLAQLATGDGPSYK         | 46d  | 28 |
| FBgn0004629 | 1203.06 | 97  | 1 | KEALELLDATLAQLATGDGPSYK        | 46d  | 28 |
| FBgn0004629 | 1139.29 | 54  | 2 | EALELLDATLAQLATGDGPSYK         | 50d  | 28 |
| FBgn0004629 | 1139.14 | 76  | 3 | EALELLDATLAQLATGDGPSYK         | 52d  | 28 |
| FBgn0004629 | 1203.06 | 107 | 2 | KEALELLDATLAQLATGDGPSYK        | 52d  | 28 |
| FBgn0004629 | 1037.22 | 34  | 1 | AINVTSVTGQVVAGSLNTYEVELDNGSDKK | 56d  | 28 |
| FBgn0004629 | 1139.23 | 45  | 1 | EALELLDATLAQLATGDGPSYK         | 56d  | 28 |
| FBgn0004629 | 1203.24 | 107 | 2 | KEALELLDATLAQLATGDGPSYK        | 56d  | 28 |
| FBgn0004636 | 734.54  | 34  | 1 | VNVNDIFYDLVR                   | 36d  | 28 |
| FBgn0004654 | 1108.92 | 73  | 1 | DAYTSQPELSNLLLDFFK             | 2d   | 18 |
| FBgn0004654 | 1108.73 | 72  | 1 | DAYTSQPELSNLLLDFFK             | 82d  | 18 |
| FBgn0004654 | 1109.11 | 56  | 1 | DAYTSQPELSNLLLDFFK             | 102d | 18 |
| FBgn0004654 | 1108.94 | 40  | 1 | DAYTSQPELSNLLLDFFK             | 2d   | 28 |
| FBgn0004654 | 1109.26 | 76  | 1 | DAYTSQPELSNLLLDFFK             | 12d  | 28 |
| FBgn0004654 | 1108.76 | 37  | 2 | DAYTSQPELSNLLLDFFK             | 56d  | 28 |
| FBgn0004687 | 1614.48 | 41  | 1 | LTDEEVEQLLANMEDQQGNINYEYFVR    | 2d   | 18 |
| FBgn0004687 | 698.92  | 72  | 1 | SGDTADDFIEGLR                  | 62d  | 18 |
| FBgn0004687 | 698.69  | 46  | 1 | SGDTADDFIEGLR                  | 122d | 18 |
| FBgn0004777 | 704.55  | 46  | 1 | EPLVA AVAAAPA AVVAAPAVVR       | 56d  | 28 |
| FBgn0004782 | 738.51  | 35  | 1 | AAEYDPHPQYR                    | 2d   | 28 |
| FBgn0004784 | 920.55  | 58  | 2 | HFSVEAMDIITSFLTK               | 2d   | 18 |
| FBgn0004784 | 712.31  | 84  | 1 | LDNILLDGEHVK                   | 2d   | 18 |
| FBgn0004784 | 946.61  | 38  | 1 | DVIIQTDDMELPMNEK               | 42d  | 18 |
| FBgn0004784 | 920.67  | 92  | 3 | HFSVEAMDIITSFLTK               | 42d  | 18 |
| FBgn0004784 | 712.31  | 48  | 1 | LDNILLDGEHVK                   | 62d  | 18 |
| FBgn0004784 | 920.66  | 56  | 1 | HFSVEAMDIITSFLTK               | 102d | 18 |
| FBgn0004784 | 712.46  | 62  | 1 | LDNILLDGEHVK                   | 12d  | 28 |
| FBgn0004833 | 1212.69 | 35  | 1 | NEVPVDLFEPLYEEIFTQLK           | 12d  | 28 |
| FBgn0004859 | 758.35  | 38  | 1 | DVSQVPAAAFSLKNLDDAREK          | 2d   | 28 |
| FBgn0004867 | 1115.51 | 60  | 1 | EFEIIDFFLGSSLKDEVK             | 2d   | 18 |

|             |         |    |   |                         |      |    |
|-------------|---------|----|---|-------------------------|------|----|
| FBgn0004867 | 1115.75 | 50 | 1 | EFEIIDFFLGSSSLKDEVLK    | 12d  | 28 |
| FBgn0004868 | 722.04  | 54 | 1 | EALASDLMGMFEK           | 2d   | 18 |
| FBgn0004868 | 523.82  | 51 | 2 | SIEGSYVYK               | 2d   | 18 |
| FBgn0004868 | 1030.91 | 73 | 2 | YYGGESASITPLEELFQR      | 2d   | 18 |
| FBgn0004868 | 825.44  | 53 | 2 | DDEYLNPAVNTIR           | 22d  | 18 |
| FBgn0004868 | 658.3   | 49 | 1 | NFLIYVQDFR              | 42d  | 18 |
| FBgn0004868 | 1031.07 | 51 | 1 | YYGGESASITPLEELFQR      | 42d  | 18 |
| FBgn0004868 | 1031.14 | 62 | 3 | YYGGESASITPLEELFQR      | 62d  | 18 |
| FBgn0004868 | 1031.03 | 59 | 3 | YYGGESASITPLEELFQR      | 102d | 18 |
| FBgn0004868 | 1031.1  | 55 | 2 | YYGGESASITPLEELFQR      | 112d | 18 |
| FBgn0004868 | 1031    | 51 | 2 | YYGGESASITPLEELFQR      | 122d | 18 |
| FBgn0004868 | 1031.17 | 48 | 1 | YYGGESASITPLEELFQR      | 132d | 18 |
| FBgn0004868 | 825.25  | 36 | 1 | DDEYLNPAVNTIR           | 2d   | 28 |
| FBgn0004868 | 657.43  | 40 | 1 | DGLSTQIIIPQK            | 2d   | 28 |
| FBgn0004868 | 721.9   | 67 | 2 | EALASDLMGMFEK           | 2d   | 28 |
| FBgn0004868 | 1030.95 | 47 | 1 | YYGGESASITPLEELFQR      | 2d   | 28 |
| FBgn0004868 | 825.21  | 58 | 2 | DDEYLNPAVNTIR           | 12d  | 28 |
| FBgn0004868 | 658.33  | 46 | 1 | NFLIYVQDFR              | 12d  | 28 |
| FBgn0004868 | 1030.97 | 61 | 1 | YYGGESASITPLEELFQR      | 12d  | 28 |
| FBgn0004868 | 825.38  | 71 | 2 | DDEYLNPAVNTIR           | 32d  | 28 |
| FBgn0004868 | 658.41  | 41 | 1 | NFLIYVQDFR              | 36d  | 28 |
| FBgn0004868 | 721.64  | 74 | 1 | EALASDLMGMFEK           | 42d  | 28 |
| FBgn0004868 | 658.52  | 41 | 3 | NFLIYVQDFR              | 42d  | 28 |
| FBgn0004868 | 1031.05 | 42 | 1 | YYGGESASITPLEELFQR      | 42d  | 28 |
| FBgn0004868 | 1030.94 | 62 | 1 | YYGGESASITPLEELFQR      | 46d  | 28 |
| FBgn0004868 | 1031    | 62 | 4 | YYGGESASITPLEELFQR      | 56d  | 28 |
| FBgn0004873 | 733.21  | 50 | 1 | DGGAGASGILQQLSDIVGVPVSR | 2d   | 18 |
| FBgn0004873 | 1077.35 | 90 | 3 | ISAGPQSHILEGVTWDEASR    | 2d   | 18 |
| FBgn0004873 | 939.65  | 48 | 1 | LLPVGLDNLVLIPEESR       | 2d   | 18 |
| FBgn0004873 | 1310.74 | 72 | 4 | NDVELPPAVSSLYLLEEEELFR  | 2d   | 18 |
| FBgn0004873 | 828.18  | 44 | 1 | IEDPLQFVPAGTNPR         | 22d  | 18 |
| FBgn0004873 | 733.23  | 44 | 1 | DGGAGASGILQQLSDIVGVPVSR | 42d  | 18 |

|             |         |     |   |                         |      |    |
|-------------|---------|-----|---|-------------------------|------|----|
| FBgn0004873 | 626.65  | 46  | 1 | LLPVGLDNLVLIPEESR       | 42d  | 18 |
| FBgn0004873 | 1310.57 | 42  | 1 | NDVELPPAVSSLGYLLEEEELFR | 42d  | 18 |
| FBgn0004873 | 590.21  | 38  | 1 | VGGAEFEALMR             | 42d  | 18 |
| FBgn0004873 | 1310.46 | 66  | 2 | NDVELPPAVSSLGYLLEEEELFR | 62d  | 18 |
| FBgn0004873 | 732.98  | 56  | 1 | DGGAGASGILQQLSDIVGVPVSR | 82d  | 18 |
| FBgn0004873 | 733.08  | 63  | 3 | DGGAGASGILQQLSDIVGVPVSR | 102d | 18 |
| FBgn0004873 | 1310.89 | 47  | 3 | NDVELPPAVSSLGYLLEEEELFR | 112d | 18 |
| FBgn0004873 | 591.01  | 48  | 1 | VGGAEFEALMR             | 112d | 18 |
| FBgn0004873 | 733.16  | 35  | 1 | DGGAGASGILQQLSDIVGVPVSR | 122d | 18 |
| FBgn0004873 | 1310.62 | 45  | 1 | NDVELPPAVSSLGYLLEEEELFR | 122d | 18 |
| FBgn0004873 | 733.2   | 36  | 1 | DGGAGASGILQQLSDIVGVPVSR | 142d | 18 |
| FBgn0004873 | 590.99  | 77  | 1 | VGGAEFEALMR             | 142d | 18 |
| FBgn0004873 | 938.41  | 89  | 2 | DATVSQAGDHVMMGAASK      | 2d   | 28 |
| FBgn0004873 | 733.15  | 41  | 1 | DGGAGASGILQQLSDIVGVPVSR | 2d   | 28 |
| FBgn0004873 | 747.38  | 100 | 1 | FAAVAAAEDGAATAEK        | 2d   | 28 |
| FBgn0004873 | 1077.31 | 40  | 1 | ISAGPQSHILEGVTWDEASR    | 2d   | 28 |
| FBgn0004873 | 939.48  | 58  | 2 | LLPVGLDNLVLIPEESR       | 2d   | 28 |
| FBgn0004873 | 1310.75 | 67  | 3 | NDVELPPAVSSLGYLLEEEELFR | 2d   | 28 |
| FBgn0004873 | 657.47  | 36  | 1 | NPFDNVTDELNEYKR         | 2d   | 28 |
| FBgn0004873 | 1099.21 | 68  | 2 | DGGAGASGILQQLSDIVGVPVSR | 12d  | 28 |
| FBgn0004873 | 1077.54 | 67  | 2 | ISAGPQSHILEGVTWDEASR    | 12d  | 28 |
| FBgn0004873 | 939.67  | 40  | 1 | LLPVGLDNLVLIPEESR       | 12d  | 28 |
| FBgn0004873 | 1310.44 | 59  | 3 | NDVELPPAVSSLGYLLEEEELFR | 12d  | 28 |
| FBgn0004873 | 733.05  | 49  | 2 | DGGAGASGILQQLSDIVGVPVSR | 22d  | 28 |
| FBgn0004873 | 1099.01 | 72  | 1 | DGGAGASGILQQLSDIVGVPVSR | 32d  | 28 |
| FBgn0004873 | 733.21  | 34  | 1 | DGGAGASGILQQLSDIVGVPVSR | 36d  | 28 |
| FBgn0004873 | 1099.33 | 50  | 1 | DGGAGASGILQQLSDIVGVPVSR | 42d  | 28 |
| FBgn0004873 | 733.13  | 42  | 2 | DGGAGASGILQQLSDIVGVPVSR | 46d  | 28 |
| FBgn0004873 | 939.58  | 37  | 2 | LLPVGLDNLVLIPEESR       | 46d  | 28 |
| FBgn0004873 | 1310.78 | 55  | 2 | NDVELPPAVSSLGYLLEEEELFR | 46d  | 28 |
| FBgn0004873 | 733.14  | 47  | 2 | DGGAGASGILQQLSDIVGVPVSR | 50d  | 28 |
| FBgn0004873 | 1310.68 | 59  | 2 | NDVELPPAVSSLGYLLEEEELFR | 50d  | 28 |



|             |         |    |   |                         |      |    |
|-------------|---------|----|---|-------------------------|------|----|
| FBgn0004873 | 1099.22 | 37 | 1 | DGGAGASGILQQLSDIVGVPVSR | 52d  | 28 |
| FBgn0004873 | 733.17  | 59 | 3 | DGGAGASGILQQLSDIVGVPVSR | 56d  | 28 |
| FBgn0004873 | 939.51  | 45 | 1 | LLPVGLDNLVLIPEESR       | 56d  | 28 |
| FBgn0004873 | 590.68  | 48 | 1 | VGGAEFEALMR             | 56d  | 28 |
| FBgn0004879 | 587.1   | 34 | 1 | EGSAEPLGTQSPPEGFR       | 2d   | 28 |
| FBgn0004888 | 723.43  | 54 | 2 | AADYLTEYNSGIK           | 2d   | 18 |
| FBgn0004888 | 827.34  | 52 | 2 | AKPVVSFIAGVSAPPGR       | 2d   | 18 |
| FBgn0004888 | 891.98  | 39 | 1 | GGTQHLGLPVFASVAEAK      | 2d   | 18 |
| FBgn0004888 | 723.4   | 64 | 3 | AADYLTEYNSGIK           | 22d  | 18 |
| FBgn0004888 | 891.99  | 40 | 1 | GGTQHLGLPVFASVAEAK      | 22d  | 18 |
| FBgn0004888 | 637.5   | 52 | 1 | KGGTQHLGLPVFASVAEAK     | 22d  | 18 |
| FBgn0004888 | 723.12  | 43 | 1 | AADYLTEYNSGIK           | 42d  | 18 |
| FBgn0004888 | 827.52  | 69 | 2 | AKPVVSFIAGVSAPPGR       | 42d  | 18 |
| FBgn0004888 | 891.85  | 66 | 2 | GGTQHLGLPVFASVAEAK      | 42d  | 18 |
| FBgn0004888 | 637.79  | 58 | 1 | KGGTQHLGLPVFASVAEAK     | 42d  | 18 |
| FBgn0004888 | 723.53  | 58 | 1 | AADYLTEYNSGIK           | 62d  | 18 |
| FBgn0004888 | 827.51  | 93 | 1 | AKPVVSFIAGVSAPPGR       | 62d  | 18 |
| FBgn0004888 | 891.99  | 65 | 2 | GGTQHLGLPVFASVAEAK      | 62d  | 18 |
| FBgn0004888 | 637.69  | 58 | 1 | KGGTQHLGLPVFASVAEAK     | 62d  | 18 |
| FBgn0004888 | 848.43  | 36 | 1 | QGTFFHSQQALEYGTK        | 62d  | 18 |
| FBgn0004888 | 723.43  | 69 | 1 | AADYLTEYNSGIK           | 82d  | 18 |
| FBgn0004888 | 891.91  | 64 | 2 | GGTQHLGLPVFASVAEAK      | 82d  | 18 |
| FBgn0004888 | 749.93  | 80 | 1 | GIILIGEIGGVAEEK         | 82d  | 18 |
| FBgn0004888 | 827.68  | 71 | 2 | AKPVVSFIAGVSAPPGR       | 102d | 18 |
| FBgn0004888 | 827.69  | 71 | 3 | AKPVVSFIAGVSAPPGR       | 112d | 18 |
| FBgn0004888 | 892.03  | 39 | 1 | GGTQHLGLPVFASVAEAK      | 112d | 18 |
| FBgn0004888 | 892.23  | 44 | 1 | GGTQHLGLPVFASVAEAK      | 122d | 18 |
| FBgn0004888 | 722.86  | 50 | 2 | AADYLTEYNSGIK           | 142d | 18 |
| FBgn0004888 | 827.43  | 63 | 2 | AKPVVSFIAGVSAPPGR       | 142d | 18 |
| FBgn0004888 | 891.9   | 42 | 2 | GGTQHLGLPVFASVAEAK      | 142d | 18 |
| FBgn0004888 | 749.6   | 41 | 1 | GIILIGEIGGVAEEK         | 142d | 18 |
| FBgn0004888 | 723.33  | 67 | 2 | AADYLTEYNSGIK           | 2d   | 28 |

|             |         |     |   |                     |     |    |
|-------------|---------|-----|---|---------------------|-----|----|
| FBgn0004888 | 827.49  | 85  | 3 | AKPVVSFIAGVSAPPGR   | 2d  | 28 |
| FBgn0004888 | 891.54  | 42  | 1 | GGTQHLGLPVFASVAEAK  | 2d  | 28 |
| FBgn0004888 | 723.43  | 67  | 3 | AADYLTEYNSGIK       | 12d | 28 |
| FBgn0004888 | 723.38  | 68  | 3 | AADYLTEYNSGIK       | 22d | 28 |
| FBgn0004888 | 723.5   | 58  | 3 | AADYLTEYNSGIK       | 32d | 28 |
| FBgn0004888 | 637.76  | 45  | 1 | KGGTQHLGLPVFASVAEAK | 32d | 28 |
| FBgn0004888 | 723.2   | 66  | 3 | AADYLTEYNSGIK       | 36d | 28 |
| FBgn0004888 | 892.01  | 52  | 3 | GGTQHLGLPVFASVAEAK  | 36d | 28 |
| FBgn0004888 | 637.81  | 67  | 1 | KGGTQHLGLPVFASVAEAK | 36d | 28 |
| FBgn0004888 | 723.47  | 62  | 2 | AADYLTEYNSGIK       | 42d | 28 |
| FBgn0004888 | 827.38  | 76  | 2 | AKPVVSFIAGVSAPPGR   | 42d | 28 |
| FBgn0004888 | 637.76  | 74  | 1 | KGGTQHLGLPVFASVAEAK | 42d | 28 |
| FBgn0004888 | 550.02  | 52  | 2 | MGHAGAIISGGK        | 42d | 28 |
| FBgn0004888 | 723.26  | 58  | 4 | AADYLTEYNSGIK       | 46d | 28 |
| FBgn0004888 | 891.96  | 43  | 1 | GGTQHLGLPVFASVAEAK  | 46d | 28 |
| FBgn0004888 | 723.28  | 54  | 3 | AADYLTEYNSGIK       | 50d | 28 |
| FBgn0004888 | 827.49  | 79  | 2 | AKPVVSFIAGVSAPPGR   | 50d | 28 |
| FBgn0004888 | 891.97  | 39  | 1 | GGTQHLGLPVFASVAEAK  | 50d | 28 |
| FBgn0004888 | 848.51  | 39  | 1 | QGTFFHSQQALEYGTK    | 50d | 28 |
| FBgn0004888 | 723.41  | 65  | 3 | AADYLTEYNSGIK       | 52d | 28 |
| FBgn0004888 | 892.08  | 50  | 1 | GGTQHLGLPVFASVAEAK  | 52d | 28 |
| FBgn0004888 | 877.53  | 45  | 1 | LVGPNCPGIIAPEQCK    | 52d | 28 |
| FBgn0004888 | 827.38  | 49  | 1 | AKPVVSFIAGVSAPPGR   | 56d | 28 |
| FBgn0004888 | 442.5   | 43  | 1 | HALISQSK            | 56d | 28 |
| FBgn0004888 | 637.56  | 67  | 3 | KGGTQHLGLPVFASVAEAK | 56d | 28 |
| FBgn0004889 | 780.25  | 74  | 1 | SFFSEIISISDVK       | 56d | 28 |
| FBgn0004907 | 726.99  | 68  | 2 | EICYEVLGLLDK        | 2d  | 18 |
| FBgn0004907 | 1059.68 | 126 | 3 | NTVVDDSQTAYQDAFDISK | 2d  | 18 |
| FBgn0004907 | 1079.92 | 52  | 1 | QAFDDAIAELDTLNEDSYK | 2d  | 18 |
| FBgn0004907 | 776.05  | 79  | 1 | SVTETGVELSNEER      | 2d  | 18 |
| FBgn0004907 | 537.24  | 62  | 2 | YDDMAQAMK           | 2d  | 18 |
| FBgn0004907 | 583.54  | 77  | 3 | YLAEVATGDAR         | 2d  | 18 |

|             |         |     |   |                         |      |    |
|-------------|---------|-----|---|-------------------------|------|----|
| FBgn0004907 | 726.69  | 76  | 3 | EICYEVLGLLDK            | 22d  | 18 |
| FBgn0004907 | 1059.4  | 105 | 1 | NTVVDDSQTAYQDAFDISK     | 22d  | 18 |
| FBgn0004907 | 1080.05 | 77  | 1 | QAFDDAIAELDTLNEDSYK     | 22d  | 18 |
| FBgn0004907 | 775.63  | 100 | 5 | SVTETGVELSNEER          | 22d  | 18 |
| FBgn0004907 | 583.76  | 64  | 2 | YLAEVATGDAR             | 22d  | 18 |
| FBgn0004907 | 1246.63 | 55  | 2 | DNLTLWTSDTQGDEAEPQEGGDN | 42d  | 18 |
| FBgn0004907 | 727.11  | 76  | 3 | EICYEVLGLLDK            | 42d  | 18 |
| FBgn0004907 | 1059.45 | 118 | 3 | NTVVDDSQTAYQDAFDISK     | 42d  | 18 |
| FBgn0004907 | 1080.19 | 69  | 3 | QAFDDAIAELDTLNEDSYK     | 42d  | 18 |
| FBgn0004907 | 775.79  | 106 | 3 | SVTETGVELSNEER          | 42d  | 18 |
| FBgn0004907 | 583.66  | 70  | 2 | YLAEVATGDAR             | 42d  | 18 |
| FBgn0004907 | 726.87  | 80  | 1 | EICYEVLGLLDK            | 62d  | 18 |
| FBgn0004907 | 454.73  | 36  | 1 | NLLSVAYK                | 62d  | 18 |
| FBgn0004907 | 1059.57 | 125 | 2 | NTVVDDSQTAYQDAFDISK     | 62d  | 18 |
| FBgn0004907 | 1079.83 | 82  | 1 | QAFDDAIAELDTLNEDSYK     | 62d  | 18 |
| FBgn0004907 | 775.9   | 90  | 3 | SVTETGVELSNEER          | 62d  | 18 |
| FBgn0004907 | 452.77  | 43  | 1 | VISSIEQK                | 62d  | 18 |
| FBgn0004907 | 583.83  | 72  | 4 | YLAEVATGDAR             | 62d  | 18 |
| FBgn0004907 | 1059.58 | 125 | 3 | NTVVDDSQTAYQDAFDISK     | 82d  | 18 |
| FBgn0004907 | 1079.95 | 101 | 1 | QAFDDAIAELDTLNEDSYK     | 82d  | 18 |
| FBgn0004907 | 776.04  | 73  | 1 | SVTETGVELSNEER          | 82d  | 18 |
| FBgn0004907 | 583.97  | 77  | 3 | YLAEVATGDAR             | 82d  | 18 |
| FBgn0004907 | 726.7   | 63  | 3 | EICYEVLGLLDK            | 102d | 18 |
| FBgn0004907 | 1059.59 | 118 | 2 | NTVVDDSQTAYQDAFDISK     | 102d | 18 |
| FBgn0004907 | 720.49  | 92  | 2 | QAFDDAIAELDTLNEDSYK     | 102d | 18 |
| FBgn0004907 | 775.95  | 90  | 5 | SVTETGVELSNEER          | 102d | 18 |
| FBgn0004907 | 1059.68 | 105 | 3 | NTVVDDSQTAYQDAFDISK     | 112d | 18 |
| FBgn0004907 | 776.03  | 89  | 2 | SVTETGVELSNEER          | 112d | 18 |
| FBgn0004907 | 596.06  | 55  | 2 | DSTLIMQLLR              | 122d | 18 |
| FBgn0004907 | 726.75  | 70  | 2 | EICYEVLGLLDK            | 122d | 18 |
| FBgn0004907 | 417.36  | 47  | 1 | LAEQSER                 | 122d | 18 |
| FBgn0004907 | 1059.56 | 113 | 2 | NTVVDDSQTAYQDAFDISK     | 122d | 18 |

|             |         |     |   |                         |      |    |
|-------------|---------|-----|---|-------------------------|------|----|
| FBgn0004907 | 1080.23 | 56  | 2 | QAFDDAIAELDTLNEDSYK     | 122d | 18 |
| FBgn0004907 | 776.05  | 99  | 2 | SVTETGVELSNEER          | 122d | 18 |
| FBgn0004907 | 583.67  | 56  | 1 | YLAEVATGDAR             | 122d | 18 |
| FBgn0004907 | 1059.55 | 118 | 2 | NTVVDDSQTAYQDAFDISK     | 132d | 18 |
| FBgn0004907 | 775.95  | 102 | 2 | SVTETGVELSNEER          | 132d | 18 |
| FBgn0004907 | 583.61  | 76  | 1 | YLAEVATGDAR             | 132d | 18 |
| FBgn0004907 | 726.51  | 54  | 3 | EICYEVLGLLDK            | 142d | 18 |
| FBgn0004907 | 454.57  | 39  | 1 | NLLSVAYK                | 142d | 18 |
| FBgn0004907 | 1079.62 | 38  | 1 | QAFDDAIAELDTLNEDSYK     | 142d | 18 |
| FBgn0004907 | 776.06  | 87  | 2 | SVTETGVELSNEER          | 142d | 18 |
| FBgn0004907 | 1246.79 | 49  | 2 | DNLTLWTSDTQGDEAEPQEGGDN | 2d   | 28 |
| FBgn0004907 | 727     | 87  | 2 | EICYEVLGLLDK            | 2d   | 28 |
| FBgn0004907 | 417.4   | 39  | 2 | LAEQSER                 | 2d   | 28 |
| FBgn0004907 | 1059.71 | 101 | 2 | NTVVDDSQTAYQDAFDISK     | 2d   | 28 |
| FBgn0004907 | 1079.91 | 72  | 1 | QAFDDAIAELDTLNEDSYK     | 2d   | 28 |
| FBgn0004907 | 775.65  | 95  | 8 | SVTETGVELSNEER          | 2d   | 28 |
| FBgn0004907 | 537.2   | 50  | 2 | YDDMAQAMK               | 2d   | 28 |
| FBgn0004907 | 583.98  | 82  | 8 | YLAEVATGDAR             | 2d   | 28 |
| FBgn0004907 | 726.84  | 76  | 2 | EICYEVLGLLDK            | 12d  | 28 |
| FBgn0004907 | 1059.53 | 118 | 3 | NTVVDDSQTAYQDAFDISK     | 12d  | 28 |
| FBgn0004907 | 1080.04 | 50  | 1 | QAFDDAIAELDTLNEDSYK     | 12d  | 28 |
| FBgn0004907 | 775.64  | 85  | 4 | SVTETGVELSNEER          | 12d  | 28 |
| FBgn0004907 | 583.77  | 79  | 3 | YLAEVATGDAR             | 12d  | 28 |
| FBgn0004907 | 454.6   | 40  | 2 | NLLSVAYK                | 22d  | 28 |
| FBgn0004907 | 1059.6  | 95  | 2 | NTVVDDSQTAYQDAFDISK     | 22d  | 28 |
| FBgn0004907 | 775.97  | 90  | 3 | SVTETGVELSNEER          | 22d  | 28 |
| FBgn0004907 | 454.57  | 43  | 3 | NLLSVAYK                | 32d  | 28 |
| FBgn0004907 | 1059.67 | 105 | 3 | NTVVDDSQTAYQDAFDISK     | 32d  | 28 |
| FBgn0004907 | 1080.21 | 76  | 2 | QAFDDAIAELDTLNEDSYK     | 32d  | 28 |
| FBgn0004907 | 775.71  | 97  | 6 | SVTETGVELSNEER          | 32d  | 28 |
| FBgn0004907 | 537.4   | 63  | 3 | YDDMAQAMK               | 32d  | 28 |
| FBgn0004907 | 583.64  | 82  | 2 | YLAEVATGDAR             | 32d  | 28 |

|             |         |     |   |                     |     |    |
|-------------|---------|-----|---|---------------------|-----|----|
| FBgn0004907 | 726.61  | 80  | 2 | EICYEVLGLLDDK       | 36d | 28 |
| FBgn0004907 | 454.45  | 44  | 3 | NLLSVAYK            | 36d | 28 |
| FBgn0004907 | 1059.44 | 95  | 3 | NTVVDDSQTAYQDAFDISK | 36d | 28 |
| FBgn0004907 | 1080.19 | 98  | 2 | QAFDDAIAELDTLNEDSYK | 36d | 28 |
| FBgn0004907 | 775.97  | 103 | 6 | SVTETGVELSNEER      | 36d | 28 |
| FBgn0004907 | 583.69  | 67  | 1 | YLAEVATGDAR         | 36d | 28 |
| FBgn0004907 | 726.64  | 34  | 1 | EICYEVLGLLDDK       | 42d | 28 |
| FBgn0004907 | 417.05  | 40  | 1 | LAEQSER             | 42d | 28 |
| FBgn0004907 | 454.78  | 40  | 2 | NLLSVAYK            | 42d | 28 |
| FBgn0004907 | 1059.69 | 97  | 2 | NTVVDDSQTAYQDAFDISK | 42d | 28 |
| FBgn0004907 | 1080.15 | 59  | 1 | QAFDDAIAELDTLNEDSYK | 42d | 28 |
| FBgn0004907 | 775.57  | 103 | 6 | SVTETGVELSNEER      | 42d | 28 |
| FBgn0004907 | 537.06  | 55  | 1 | YDDMAQAMK           | 42d | 28 |
| FBgn0004907 | 583.63  | 75  | 3 | YLAEVATGDAR         | 42d | 28 |
| FBgn0004907 | 726.64  | 62  | 1 | EICYEVLGLLDDK       | 46d | 28 |
| FBgn0004907 | 454.54  | 38  | 1 | NLLSVAYK            | 46d | 28 |
| FBgn0004907 | 1059.72 | 101 | 3 | NTVVDDSQTAYQDAFDISK | 46d | 28 |
| FBgn0004907 | 1079.71 | 64  | 1 | QAFDDAIAELDTLNEDSYK | 46d | 28 |
| FBgn0004907 | 775.81  | 90  | 4 | SVTETGVELSNEER      | 46d | 28 |
| FBgn0004907 | 537.42  | 61  | 2 | YDDMAQAMK           | 46d | 28 |
| FBgn0004907 | 583.94  | 74  | 2 | YLAEVATGDAR         | 46d | 28 |
| FBgn0004907 | 727.07  | 68  | 3 | EICYEVLGLLDDK       | 50d | 28 |
| FBgn0004907 | 1059.29 | 106 | 3 | NTVVDDSQTAYQDAFDISK | 50d | 28 |
| FBgn0004907 | 1080.23 | 72  | 3 | QAFDDAIAELDTLNEDSYK | 50d | 28 |
| FBgn0004907 | 775.7   | 92  | 6 | SVTETGVELSNEER      | 50d | 28 |
| FBgn0004907 | 583.75  | 64  | 2 | YLAEVATGDAR         | 50d | 28 |
| FBgn0004907 | 726.69  | 73  | 4 | EICYEVLGLLDDK       | 52d | 28 |
| FBgn0004907 | 1059.59 | 94  | 1 | NTVVDDSQTAYQDAFDISK | 52d | 28 |
| FBgn0004907 | 1080.09 | 60  | 1 | QAFDDAIAELDTLNEDSYK | 52d | 28 |
| FBgn0004907 | 775.97  | 93  | 4 | SVTETGVELSNEER      | 52d | 28 |
| FBgn0004907 | 583.66  | 63  | 2 | YLAEVATGDAR         | 52d | 28 |
| FBgn0004907 | 726.9   | 80  | 6 | EICYEVLGLLDDK       | 56d | 28 |

|             |         |     |   |                                  |      |    |
|-------------|---------|-----|---|----------------------------------|------|----|
| FBgn0004907 | 1059.53 | 101 | 3 | NTVVDDSQTAYQDAFDISK              | 56d  | 28 |
| FBgn0004907 | 1080.13 | 60  | 3 | QAFDDAIAELDTLNEDSYK              | 56d  | 28 |
| FBgn0004907 | 775.85  | 82  | 4 | SVTETGVELSNEER                   | 56d  | 28 |
| FBgn0004922 | 650.38  | 56  | 1 | DIPGLTDTTIPR                     | 2d   | 28 |
| FBgn0005391 | 496.57  | 35  | 1 | IYGKPEER                         | 62d  | 18 |
| FBgn0005391 | 1078.5  | 48  | 1 | LVELTNTVNVQPQEIHLIGSGPAAHVAGVAGR | 82d  | 18 |
| FBgn0005533 | 1203.52 | 79  | 1 | DNYVPAVSALEQDIIEVDADTK           | 2d   | 18 |
| FBgn0005533 | 1203.69 | 47  | 1 | DNYVPAVSALEQDIIEVDADTK           | 22d  | 18 |
| FBgn0005533 | 1203.39 | 60  | 3 | DNYVPAVSALEQDIIEVDADTK           | 42d  | 18 |
| FBgn0005533 | 1203.29 | 87  | 1 | DNYVPAVSALEQDIIEVDADTK           | 62d  | 18 |
| FBgn0005533 | 1203.66 | 37  | 1 | DNYVPAVSALEQDIIEVDADTK           | 82d  | 18 |
| FBgn0005533 | 1203.64 | 55  | 1 | DNYVPAVSALEQDIIEVDADTK           | 12d  | 28 |
| FBgn0005533 | 1203.73 | 50  | 1 | DNYVPAVSALEQDIIEVDADTK           | 50d  | 28 |
| FBgn0005533 | 1203.49 | 104 | 2 | DNYVPAVSALEQDIIEVDADTK           | 56d  | 28 |
| FBgn0005585 | 1034.39 | 59  | 3 | GAWEHPEIANPEYVPDDK               | 2d   | 18 |
| FBgn0005585 | 894.35  | 42  | 1 | FVLTPGTFYNDAEADK                 | 22d  | 18 |
| FBgn0005585 | 1034.43 | 50  | 1 | GAWEHPEIANPEYVPDDK               | 22d  | 18 |
| FBgn0005585 | 1034.53 | 63  | 2 | GAWEHPEIANPEYVPDDK               | 62d  | 18 |
| FBgn0005585 | 1034.35 | 59  | 1 | GAWEHPEIANPEYVPDDK               | 82d  | 18 |
| FBgn0005585 | 918.5   | 61  | 1 | VESGNLEDDWDFLAPK                 | 82d  | 18 |
| FBgn0005585 | 1034.43 | 53  | 1 | GAWEHPEIANPEYVPDDK               | 112d | 18 |
| FBgn0005585 | 1034.53 | 61  | 1 | GAWEHPEIANPEYVPDDK               | 142d | 18 |
| FBgn0005585 | 1034.35 | 70  | 3 | GAWEHPEIANPEYVPDDK               | 2d   | 28 |
| FBgn0005585 | 1034.68 | 59  | 2 | GAWEHPEIANPEYVPDDK               | 12d  | 28 |
| FBgn0005585 | 1034.33 | 62  | 3 | GAWEHPEIANPEYVPDDK               | 22d  | 28 |
| FBgn0005585 | 1034.38 | 67  | 3 | GAWEHPEIANPEYVPDDK               | 32d  | 28 |
| FBgn0005585 | 1034.35 | 64  | 2 | GAWEHPEIANPEYVPDDK               | 36d  | 28 |
| FBgn0005585 | 1034.43 | 69  | 3 | GAWEHPEIANPEYVPDDK               | 42d  | 28 |
| FBgn0005585 | 1034.4  | 61  | 2 | GAWEHPEIANPEYVPDDK               | 46d  | 28 |
| FBgn0005585 | 1034.4  | 53  | 1 | GAWEHPEIANPEYVPDDK               | 50d  | 28 |
| FBgn0005585 | 1034.36 | 67  | 2 | GAWEHPEIANPEYVPDDK               | 52d  | 28 |
| FBgn0005585 | 895     | 53  | 1 | FVLTPGTFYNDAEADK                 | 56d  | 28 |

|             |         |     |   |                                      |      |    |
|-------------|---------|-----|---|--------------------------------------|------|----|
| FBgn0005586 | 853.11  | 37  | 2 | MSESLDADPTLVGGGQK                    | 50d  | 28 |
| FBgn0005629 | 738.49  | 35  | 1 | EDLAQDIECRVK                         | 46d  | 28 |
| FBgn0005630 | 372.58  | 36  | 1 | FLKAHK                               | 32d  | 28 |
| FBgn0005630 | 371.89  | 37  | 1 | FLKAHK                               | 56d  | 28 |
| FBgn0005633 | 1178.64 | 77  | 2 | ADSVVAGTPANEEAAPVEVEEIK              | 82d  | 18 |
| FBgn0005633 | 656.47  | 36  | 2 | APPPPPEDDGYR                         | 82d  | 18 |
| FBgn0005633 | 719.85  | 56  | 1 | NISGSDIDSYAPAK                       | 82d  | 18 |
| FBgn0005633 | 882.92  | 57  | 2 | TNYDDVIDYIDKK                        | 82d  | 18 |
| FBgn0005633 | 1178.53 | 53  | 1 | ADSVVAGTPANEEAAPVEVEEIK              | 102d | 18 |
| FBgn0005633 | 1178.81 | 58  | 2 | ADSVVAGTPANEEAAPVEVEEIK              | 122d | 18 |
| FBgn0005634 | 613.01  | 40  | 1 | AGVLAHLEER                           | 2d   | 18 |
| FBgn0005634 | 1523.17 | 49  | 2 | DLSEELEALKNELLDLDTTAAQQELR           | 2d   | 18 |
| FBgn0005634 | 1128.38 | 53  | 1 | GSGAVPHPAVLIGELEQQLQANPILEAFGNAK     | 2d   | 18 |
| FBgn0005634 | 1128.37 | 41  | 1 | GSGAVPHPAVLIGELEQQLQANPILEAFGNAK     | 12d  | 28 |
| FBgn0005634 | 362.71  | 34  | 1 | AIRQAKDER                            | 32d  | 28 |
| FBgn0005634 | 362.85  | 34  | 1 | AIRQAKDER                            | 42d  | 28 |
| FBgn0005664 | 504.13  | 62  | 3 | DSLTDGDDKR                           | 2d   | 18 |
| FBgn0005664 | 619.29  | 63  | 7 | FNSLEELQTR                           | 2d   | 18 |
| FBgn0005664 | 668.71  | 71  | 6 | GQYSLIEPDGTR                         | 2d   | 18 |
| FBgn0005664 | 498.39  | 40  | 2 | GQYSLIEPDGTRR                        | 2d   | 18 |
| FBgn0005664 | 964.91  | 76  | 2 | IVEYTADDVSGFNIVSK                    | 2d   | 18 |
| FBgn0005664 | 1109.33 | 46  | 2 | LLDQQTLLLAQSLPSIQATVVSHPTLLATR       | 2d   | 18 |
| FBgn0005664 | 700.72  | 68  | 4 | LLNNDLWQLDR                          | 2d   | 18 |
| FBgn0005664 | 568.68  | 66  | 5 | LPVSTTTSSSR                          | 2d   | 18 |
| FBgn0005664 | 522.43  | 42  | 2 | LQQEQQLR                             | 2d   | 18 |
| FBgn0005664 | 405.18  | 47  | 1 | LSASTSSR                             | 2d   | 18 |
| FBgn0005664 | 1505.71 | 91  | 3 | LTAQAIAEAQSLVEAQQASQLQLEAQR          | 2d   | 18 |
| FBgn0005664 | 1323.66 | 96  | 3 | NQAQQLMEQFQQQVQQQEQQR                | 2d   | 18 |
| FBgn0005664 | 793.68  | 108 | 4 | SSNLQQQQQQQLR                        | 2d   | 18 |
| FBgn0005664 | 1312.55 | 56  | 1 | SSQPLILSQPSSATVQAQLISSPLLESGLNGLITTR | 2d   | 18 |
| FBgn0005664 | 403.77  | 34  | 1 | TTLLTR                               | 2d   | 18 |
| FBgn0005664 | 619.3   | 60  | 2 | FNSLEELQTR                           | 22d  | 18 |

|             |         |     |    |                                  |      |    |
|-------------|---------|-----|----|----------------------------------|------|----|
| FBgn0005664 | 700.95  | 85  | 2  | LLNNDLWQLDR                      | 22d  | 18 |
| FBgn0005664 | 522.41  | 54  | 3  | LQQEQQLR                         | 22d  | 18 |
| FBgn0005664 | 793.73  | 87  | 1  | SSNLQQQQQQQLR                    | 22d  | 18 |
| FBgn0005664 | 619.55  | 61  | 3  | FNSLEELQTR                       | 42d  | 18 |
| FBgn0005664 | 1109.38 | 44  | 1  | LLDQQTLLLAQSLPSIQATVVSHPPPTLLATR | 42d  | 18 |
| FBgn0005664 | 701.1   | 64  | 1  | LLNNDLWQLDR                      | 42d  | 18 |
| FBgn0005664 | 568.87  | 56  | 2  | LPVSTTTSSSR                      | 42d  | 18 |
| FBgn0005664 | 522.08  | 43  | 1  | LQQEQQLR                         | 42d  | 18 |
| FBgn0005664 | 1004.34 | 45  | 1  | LTAQAIAEAQSLVEAQQASQLQLEAQNR     | 42d  | 18 |
| FBgn0005664 | 538.47  | 45  | 1  | ERDLEAWR                         | 62d  | 18 |
| FBgn0005664 | 619.49  | 59  | 4  | FNSLEELQTR                       | 62d  | 18 |
| FBgn0005664 | 523.06  | 62  | 2  | LDEQQQQR                         | 62d  | 18 |
| FBgn0005664 | 701.05  | 57  | 1  | LLNNDLWQLDR                      | 62d  | 18 |
| FBgn0005664 | 547.84  | 50  | 8  | LPGSTTTSSSR                      | 62d  | 18 |
| FBgn0005664 | 522.32  | 61  | 5  | LQQEQQLR                         | 62d  | 18 |
| FBgn0005664 | 405.07  | 36  | 3  | LSASTSSR                         | 62d  | 18 |
| FBgn0005664 | 793.66  | 108 | 11 | SSNLQQQQQQQLR                    | 62d  | 18 |
| FBgn0005664 | 403.68  | 34  | 1  | TTLLTR                           | 62d  | 18 |
| FBgn0005664 | 504.09  | 58  | 3  | DSL TGDDKR                       | 82d  | 18 |
| FBgn0005664 | 619.46  | 64  | 3  | FNSLEELQTR                       | 82d  | 18 |
| FBgn0005664 | 523.3   | 62  | 4  | LDEQQQQR                         | 82d  | 18 |
| FBgn0005664 | 700.92  | 65  | 1  | LLNNDLWQLDR                      | 82d  | 18 |
| FBgn0005664 | 547.78  | 64  | 4  | LPGSTTTSSSR                      | 82d  | 18 |
| FBgn0005664 | 568.77  | 47  | 2  | LPVSTTTSSSR                      | 82d  | 18 |
| FBgn0005664 | 405.16  | 47  | 5  | LSASTSSR                         | 82d  | 18 |
| FBgn0005664 | 793.91  | 108 | 1  | SSNLQQQQQQQLR                    | 82d  | 18 |
| FBgn0005664 | 699.94  | 68  | 2  | LLNNDLWQLDR                      | 102d | 18 |
| FBgn0005664 | 568.99  | 52  | 3  | LPVSTTTSSSR                      | 102d | 18 |
| FBgn0005664 | 522.5   | 44  | 1  | LQQEQQLR                         | 102d | 18 |
| FBgn0005664 | 405.28  | 34  | 1  | LSASTSSR                         | 102d | 18 |
| FBgn0005664 | 523.2   | 53  | 1  | LDEQQQQR                         | 112d | 18 |
| FBgn0005664 | 405.1   | 47  | 6  | LSASTSSR                         | 112d | 18 |



|             |         |     |   |                                  |      |    |
|-------------|---------|-----|---|----------------------------------|------|----|
| FBgn0005664 | 700.41  | 68  | 3 | LLNNDLWQLDR                      | 122d | 18 |
| FBgn0005664 | 568.74  | 56  | 2 | LPVSTTTSSSR                      | 122d | 18 |
| FBgn0005664 | 700.48  | 68  | 2 | LLNNDLWQLDR                      | 132d | 18 |
| FBgn0005664 | 568.65  | 67  | 1 | LPVSTTTSSSR                      | 132d | 18 |
| FBgn0005664 | 522.07  | 45  | 1 | LQQEQQLR                         | 132d | 18 |
| FBgn0005664 | 619.4   | 62  | 3 | FNSLEELQTR                       | 142d | 18 |
| FBgn0005664 | 699.76  | 73  | 1 | LLNNDLWQLDR                      | 142d | 18 |
| FBgn0005664 | 569.02  | 56  | 2 | LPVSTTTSSSR                      | 142d | 18 |
| FBgn0005664 | 522.34  | 44  | 2 | LQQEQQLR                         | 142d | 18 |
| FBgn0005664 | 504.24  | 56  | 4 | DSL TGDDKR                       | 2d   | 28 |
| FBgn0005664 | 619.14  | 78  | 3 | FNSLEELQTR                       | 2d   | 28 |
| FBgn0005664 | 668.77  | 53  | 6 | GQYSLIEPDGTR                     | 2d   | 28 |
| FBgn0005664 | 964.86  | 78  | 2 | IVEYTADDVSGFNAIVSK               | 2d   | 28 |
| FBgn0005664 | 523.12  | 57  | 3 | LDEQQQQR                         | 2d   | 28 |
| FBgn0005664 | 700.84  | 68  | 3 | LLNNDLWQLDR                      | 2d   | 28 |
| FBgn0005664 | 547.85  | 47  | 1 | LPGSTTTSSSR                      | 2d   | 28 |
| FBgn0005664 | 568.76  | 60  | 9 | LPVSTTTSSSR                      | 2d   | 28 |
| FBgn0005664 | 522.48  | 46  | 4 | LQQEQQLR                         | 2d   | 28 |
| FBgn0005664 | 405.21  | 39  | 2 | LSASTSSR                         | 2d   | 28 |
| FBgn0005664 | 1004.34 | 108 | 3 | LTAQAIAEAQSLVEAQQASQLQLEAQNR     | 2d   | 28 |
| FBgn0005664 | 793.86  | 108 | 4 | SSNLQQQQQQQLR                    | 2d   | 28 |
| FBgn0005664 | 403.75  | 48  | 2 | TTLLTR                           | 2d   | 28 |
| FBgn0005664 | 619.39  | 67  | 2 | FNSLEELQTR                       | 12d  | 28 |
| FBgn0005664 | 668.94  | 46  | 2 | GQYSLIEPDGTR                     | 12d  | 28 |
| FBgn0005664 | 965.07  | 58  | 1 | IVEYTADDVSGFNAIVSK               | 12d  | 28 |
| FBgn0005664 | 1663.42 | 34  | 1 | LLDQQTLLLAQSLPSIQATVVSHPPPTLLATR | 12d  | 28 |
| FBgn0005664 | 700.96  | 73  | 3 | LLNNDLWQLDR                      | 12d  | 28 |
| FBgn0005664 | 568.53  | 56  | 6 | LPVSTTTSSSR                      | 12d  | 28 |
| FBgn0005664 | 522.41  | 41  | 3 | LQQEQQLR                         | 12d  | 28 |
| FBgn0005664 | 405.39  | 41  | 1 | LSASTSSR                         | 12d  | 28 |
| FBgn0005664 | 1505.98 | 66  | 3 | LTAQAIAEAQSLVEAQQASQLQLEAQNR     | 12d  | 28 |
| FBgn0005664 | 793.38  | 52  | 3 | SSNLQQQQQQQLR                    | 12d  | 28 |

|             |        |    |   |             |     |    |
|-------------|--------|----|---|-------------|-----|----|
| FBgn0005664 | 538.16 | 35 | 1 | ERDLEAWR    | 22d | 28 |
| FBgn0005664 | 619.21 | 53 | 2 | FNSLEELQTR  | 22d | 28 |
| FBgn0005664 | 700.76 | 64 | 2 | LLNNDLWQLDR | 22d | 28 |
| FBgn0005664 | 619.16 | 72 | 3 | FNSLEELQTR  | 32d | 28 |
| FBgn0005664 | 700.47 | 68 | 2 | LLNNDLWQLDR | 32d | 28 |
| FBgn0005664 | 568.79 | 69 | 1 | LPVSTTTSSSR | 32d | 28 |
| FBgn0005664 | 522.45 | 54 | 1 | LQQEQQLR    | 32d | 28 |
| FBgn0005664 | 619.11 | 67 | 2 | FNSLEELQTR  | 36d | 28 |
| FBgn0005664 | 701.04 | 68 | 3 | LLNNDLWQLDR | 36d | 28 |
| FBgn0005664 | 568.66 | 56 | 3 | LPVSTTTSSSR | 36d | 28 |
| FBgn0005664 | 522.42 | 47 | 3 | LQQEQQLR    | 36d | 28 |
| FBgn0005664 | 504.38 | 44 | 1 | DSL TGDDKR  | 42d | 28 |
| FBgn0005664 | 619.18 | 56 | 3 | FNSLEELQTR  | 42d | 28 |
| FBgn0005664 | 522.98 | 54 | 2 | LDEQQQQR    | 42d | 28 |
| FBgn0005664 | 701.09 | 73 | 2 | LLNNDLWQLDR | 42d | 28 |
| FBgn0005664 | 568.76 | 56 | 3 | LPVSTTTSSSR | 42d | 28 |
| FBgn0005664 | 522.18 | 49 | 3 | LQQEQQLR    | 42d | 28 |
| FBgn0005664 | 405.27 | 42 | 2 | LSASTSSR    | 42d | 28 |
| FBgn0005664 | 619.43 | 61 | 2 | FNSLEELQTR  | 46d | 28 |
| FBgn0005664 | 523.41 | 62 | 1 | LDEQQQQR    | 46d | 28 |
| FBgn0005664 | 700.94 | 73 | 3 | LLNNDLWQLDR | 46d | 28 |
| FBgn0005664 | 568.68 | 56 | 2 | LPVSTTTSSSR | 46d | 28 |
| FBgn0005664 | 522.39 | 45 | 3 | LQQEQQLR    | 46d | 28 |
| FBgn0005664 | 405.18 | 45 | 1 | LSASTSSR    | 46d | 28 |
| FBgn0005664 | 619.44 | 63 | 3 | FNSLEELQTR  | 50d | 28 |
| FBgn0005664 | 700.26 | 68 | 1 | LLNNDLWQLDR | 50d | 28 |
| FBgn0005664 | 547.69 | 39 | 2 | LPGSTTTSSSR | 50d | 28 |
| FBgn0005664 | 568.71 | 56 | 1 | LPVSTTTSSSR | 50d | 28 |
| FBgn0005664 | 522.15 | 59 | 2 | LQQEQQLR    | 50d | 28 |
| FBgn0005664 | 619.19 | 64 | 3 | FNSLEELQTR  | 52d | 28 |
| FBgn0005664 | 568.82 | 61 | 2 | LPVSTTTSSSR | 52d | 28 |
| FBgn0005664 | 522.2  | 40 | 1 | LQQEQQLR    | 52d | 28 |

|             |         |    |   |                              |      |    |
|-------------|---------|----|---|------------------------------|------|----|
| FBgn0005664 | 1505.71 | 90 | 1 | LTAQAIAEAQSLVEAQQASQLQLEAQNR | 52d  | 28 |
| FBgn0005664 | 504.12  | 56 | 3 | DSL TGDDKR                   | 56d  | 28 |
| FBgn0005664 | 522.56  | 67 | 2 | LDEQQQR                      | 56d  | 28 |
| FBgn0005664 | 700.99  | 68 | 1 | LLNNDLWQLDR                  | 56d  | 28 |
| FBgn0005664 | 568.85  | 56 | 2 | LPVSTTTSSSR                  | 56d  | 28 |
| FBgn0005664 | 522.37  | 49 | 2 | LQQEQQLR                     | 56d  | 28 |
| FBgn0005666 | 1002.61 | 34 | 1 | AGNVFEFDVPVTGEPLPSK          | 2d   | 18 |
| FBgn0005666 | 768.92  | 60 | 3 | DDGGEPVESYLVEK               | 2d   | 18 |
| FBgn0005666 | 1052.83 | 82 | 2 | AVNEEGESEPLETESAITAK         | 22d  | 18 |
| FBgn0005666 | 1002.67 | 58 | 2 | AGNVFEFDVPVTGEPLPSK          | 42d  | 18 |
| FBgn0005666 | 1059.9  | 91 | 3 | AINEEGESDPLDSDDSIIAK         | 42d  | 18 |
| FBgn0005666 | 1136.6  | 55 | 3 | VLAVNTEGESEPLTGEQSVIAK       | 42d  | 18 |
| FBgn0005666 | 1041.89 | 70 | 2 | VSAVNAAGTGEPDSTPPIIAK        | 42d  | 18 |
| FBgn0005666 | 861.97  | 66 | 1 | KVESFLSPLIDQFAK              | 62d  | 18 |
| FBgn0005666 | 981.22  | 77 | 1 | AENIYGASEALEGKPV LAK         | 82d  | 18 |
| FBgn0005666 | 806.82  | 37 | 1 | NPFDVPTKPGTPTIK              | 82d  | 18 |
| FBgn0005666 | 1060.08 | 93 | 3 | AINEEGESDPLDSDDSIIAK         | 102d | 18 |
| FBgn0005666 | 1136.35 | 58 | 2 | VLAVNTEGESEPLTGEQSVIAK       | 102d | 18 |
| FBgn0005666 | 1041.82 | 70 | 3 | VSAVNAAGTGEPDSTPPIIAK        | 102d | 18 |
| FBgn0005666 | 1060.18 | 90 | 1 | AINEEGESDPLDSDDSIIAK         | 112d | 18 |
| FBgn0005666 | 1136.68 | 56 | 1 | VLAVNTEGESEPLTGEQSVIAK       | 112d | 18 |
| FBgn0005666 | 1042.25 | 73 | 1 | VSAVNAAGTGEPDSTPPIIAK        | 112d | 18 |
| FBgn0005666 | 769.36  | 54 | 1 | DDGGEPVESYLVEK               | 142d | 18 |
| FBgn0005666 | 1042.21 | 78 | 3 | VSAVNAAGTGEPDSTPPIIAK        | 142d | 18 |
| FBgn0005666 | 1002.43 | 42 | 1 | AGNVFEFDVPVTGEPLPSK          | 2d   | 28 |
| FBgn0005666 | 1052.94 | 76 | 3 | AVNEEGESEPLETESAITAK         | 2d   | 28 |
| FBgn0005666 | 655     | 38 | 1 | SDGPEYNVDGLVPGHDYK           | 2d   | 28 |
| FBgn0005666 | 1002.76 | 56 | 1 | AGNVFEFDVPVTGEPLPSK          | 12d  | 28 |
| FBgn0005666 | 1053.13 | 87 | 2 | AVNEEGESEPLETESAITAK         | 12d  | 28 |
| FBgn0005666 | 1053.15 | 57 | 2 | AVNEEGESEPLETESAITAK         | 36d  | 28 |
| FBgn0005666 | 1052.83 | 67 | 3 | AVNEEGESEPLETESAITAK         | 50d  | 28 |
| FBgn0005666 | 1002.49 | 53 | 1 | AGNVFEFDVPVTGEPLPSK          | 56d  | 28 |

|             |         |    |   |                        |      |    |
|-------------|---------|----|---|------------------------|------|----|
| FBgn0005666 | 837.58  | 40 | 1 | EGESEPLETLGSIIAK       | 56d  | 28 |
| FBgn0005670 | 451.6   | 35 | 1 | LTLWATSFGTTR           | 52d  | 28 |
| FBgn0005671 | 1169.15 | 73 | 2 | AVVGEEALTPDDLLYLEFLTK  | 2d   | 18 |
| FBgn0005671 | 761.61  | 67 | 2 | AVVQVFEGTSGIDAK        | 2d   | 18 |
| FBgn0005671 | 1226.67 | 71 | 2 | IYPEEMIQTGISAIDVMNSIAR | 2d   | 18 |
| FBgn0005671 | 792.55  | 43 | 2 | QIYPPVNVLPPLSR         | 2d   | 18 |
| FBgn0005671 | 821.13  | 42 | 2 | TVSGVNGPLVILDEVK       | 2d   | 18 |
| FBgn0005671 | 761.1   | 77 | 3 | AVVQVFEGTSGIDAK        | 22d  | 18 |
| FBgn0005671 | 726.78  | 38 | 1 | IPIFSAAGLPHNEIAAQICR   | 22d  | 18 |
| FBgn0005671 | 720.58  | 77 | 1 | NTLCEFTGDILR           | 22d  | 18 |
| FBgn0005671 | 820.96  | 55 | 2 | TVSGVNGPLVILDEVK       | 22d  | 18 |
| FBgn0005671 | 1169.26 | 61 | 7 | AVVGEEALTPDDLLYLEFLTK  | 42d  | 18 |
| FBgn0005671 | 488.56  | 52 | 1 | FAEIVQLR               | 42d  | 18 |
| FBgn0005671 | 689.21  | 85 | 3 | IPASILAEFYPR           | 42d  | 18 |
| FBgn0005671 | 1225.82 | 84 | 2 | IYPEEMIQTGISAIDVMNSIAR | 42d  | 18 |
| FBgn0005671 | 792.4   | 42 | 2 | QIYPPVNVLPPLSR         | 42d  | 18 |
| FBgn0005671 | 821.03  | 78 | 3 | TVSGVNGPLVILDEVK       | 42d  | 18 |
| FBgn0005671 | 779.89  | 65 | 1 | AVVGEEALTPDDLLYLEFLTK  | 62d  | 18 |
| FBgn0005671 | 761.65  | 83 | 1 | AVVQVFEGTSGIDAK        | 62d  | 18 |
| FBgn0005671 | 488.86  | 52 | 2 | FAEIVQLR               | 62d  | 18 |
| FBgn0005671 | 689.07  | 86 | 1 | IPASILAEFYPR           | 62d  | 18 |
| FBgn0005671 | 671.86  | 54 | 2 | NFISQGNENR             | 62d  | 18 |
| FBgn0005671 | 792.24  | 39 | 1 | QIYPPVNVLPPLSR         | 62d  | 18 |
| FBgn0005671 | 821.13  | 58 | 2 | TVSGVNGPLVILDEVK       | 62d  | 18 |
| FBgn0005671 | 761.3   | 88 | 2 | AVVQVFEGTSGIDAK        | 82d  | 18 |
| FBgn0005671 | 726.4   | 55 | 3 | IPIFSAAGLPHNEIAAQICR   | 82d  | 18 |
| FBgn0005671 | 1226.45 | 77 | 2 | IYPEEMIQTGISAIDVMNSIAR | 82d  | 18 |
| FBgn0005671 | 821.09  | 71 | 1 | TVSGVNGPLVILDEVK       | 82d  | 18 |
| FBgn0005671 | 1169.23 | 51 | 2 | AVVGEEALTPDDLLYLEFLTK  | 102d | 18 |
| FBgn0005671 | 761.57  | 70 | 1 | AVVQVFEGTSGIDAK        | 102d | 18 |
| FBgn0005671 | 689.46  | 77 | 3 | IPASILAEFYPR           | 102d | 18 |
| FBgn0005671 | 1226.67 | 78 | 2 | IYPEEMIQTGISAIDVMNSIAR | 102d | 18 |

|             |         |    |   |                        |      |    |
|-------------|---------|----|---|------------------------|------|----|
| FBgn0005671 | 671.95  | 49 | 1 | NFISQGNYENR            | 102d | 18 |
| FBgn0005671 | 792.62  | 57 | 2 | QIYPPVNVLPPLSR         | 102d | 18 |
| FBgn0005671 | 820.98  | 43 | 2 | TVSGVNGPLVILDEVK       | 102d | 18 |
| FBgn0005671 | 689.34  | 85 | 3 | IPASILAEFYPR           | 112d | 18 |
| FBgn0005671 | 1089.97 | 38 | 1 | IPIFSAAGLPHNEIAAQICR   | 112d | 18 |
| FBgn0005671 | 1225.83 | 60 | 3 | IYPEEMIQTGISAIDVMNSIAR | 112d | 18 |
| FBgn0005671 | 792.29  | 41 | 1 | QIYPPVNVLPPLSR         | 112d | 18 |
| FBgn0005671 | 820.86  | 54 | 1 | TVSGVNGPLVILDEVK       | 112d | 18 |
| FBgn0005671 | 1169.29 | 36 | 1 | AVVGEEALTPDDLLYLEFLTK  | 122d | 18 |
| FBgn0005671 | 761.57  | 76 | 2 | AVVQVFEGTSGIDAK        | 122d | 18 |
| FBgn0005671 | 488.87  | 51 | 2 | FAEIVQLR               | 122d | 18 |
| FBgn0005671 | 689.38  | 78 | 2 | IPASILAEFYPR           | 122d | 18 |
| FBgn0005671 | 1226.39 | 66 | 2 | IYPEEMIQTGISAIDVMNSIAR | 122d | 18 |
| FBgn0005671 | 671.99  | 54 | 1 | NFISQGNYENR            | 122d | 18 |
| FBgn0005671 | 792     | 55 | 1 | QIYPPVNVLPPLSR         | 122d | 18 |
| FBgn0005671 | 821.15  | 35 | 1 | TVSGVNGPLVILDEVK       | 122d | 18 |
| FBgn0005671 | 488.22  | 45 | 2 | FAEIVQLR               | 132d | 18 |
| FBgn0005671 | 689.61  | 86 | 1 | IPASILAEFYPR           | 132d | 18 |
| FBgn0005671 | 1226.2  | 68 | 3 | IYPEEMIQTGISAIDVMNSIAR | 132d | 18 |
| FBgn0005671 | 792.24  | 42 | 2 | QIYPPVNVLPPLSR         | 132d | 18 |
| FBgn0005671 | 689.48  | 75 | 2 | IPASILAEFYPR           | 142d | 18 |
| FBgn0005671 | 1226.83 | 77 | 1 | IYPEEMIQTGISAIDVMNSIAR | 142d | 18 |
| FBgn0005671 | 820.97  | 43 | 2 | TVSGVNGPLVILDEVK       | 142d | 18 |
| FBgn0005671 | 761.33  | 73 | 2 | AVVQVFEGTSGIDAK        | 2d   | 28 |
| FBgn0005671 | 689.29  | 72 | 3 | IPASILAEFYPR           | 2d   | 28 |
| FBgn0005671 | 818.19  | 36 | 1 | IYPEEMIQTGISAIDVMNSIAR | 2d   | 28 |
| FBgn0005671 | 671.51  | 66 | 3 | NFISQGNYENR            | 2d   | 28 |
| FBgn0005671 | 792.56  | 50 | 2 | QIYPPVNVLPPLSR         | 2d   | 28 |
| FBgn0005671 | 546.37  | 66 | 3 | SGQVLEVSGSK            | 2d   | 28 |
| FBgn0005671 | 821.07  | 72 | 2 | TVSGVNGPLVILDEVK       | 2d   | 28 |
| FBgn0005671 | 1169.09 | 58 | 3 | AVVGEEALTPDDLLYLEFLTK  | 12d  | 28 |
| FBgn0005671 | 761.54  | 87 | 2 | AVVQVFEGTSGIDAK        | 12d  | 28 |

|             |         |     |   |                        |     |    |
|-------------|---------|-----|---|------------------------|-----|----|
| FBgn0005671 | 488.97  | 43  | 3 | FAEIVQLR               | 12d | 28 |
| FBgn0005671 | 689.52  | 86  | 1 | IPASILAEFYPR           | 12d | 28 |
| FBgn0005671 | 1226.46 | 71  | 3 | IYPEEMIQTGISAIDVMNSIAR | 12d | 28 |
| FBgn0005671 | 672.03  | 43  | 1 | NFISQGNYENR            | 12d | 28 |
| FBgn0005671 | 792.63  | 49  | 2 | QIYPPVNVLP SLSR        | 12d | 28 |
| FBgn0005671 | 761.15  | 84  | 1 | AVVQVFEGTSGIDAK        | 22d | 28 |
| FBgn0005671 | 761.25  | 75  | 2 | AVVQVFEGTSGIDAK        | 32d | 28 |
| FBgn0005671 | 689.52  | 55  | 1 | IPASILAEFYPR           | 32d | 28 |
| FBgn0005671 | 671.93  | 72  | 3 | NFISQGNYENR            | 32d | 28 |
| FBgn0005671 | 820.89  | 68  | 2 | TVSGVNGPLVILDEVK       | 32d | 28 |
| FBgn0005671 | 761.16  | 91  | 2 | AVVQVFEGTSGIDAK        | 36d | 28 |
| FBgn0005671 | 488.63  | 48  | 1 | FAEIVQLR               | 36d | 28 |
| FBgn0005671 | 792.63  | 58  | 2 | QIYPPVNVLP SLSR        | 36d | 28 |
| FBgn0005671 | 553.1   | 37  | 2 | TPVSEDM LGR            | 36d | 28 |
| FBgn0005671 | 821.01  | 54  | 2 | TVSGVNGPLVILDEVK       | 36d | 28 |
| FBgn0005671 | 761.31  | 103 | 3 | AVVQVFEGTSGIDAK        | 42d | 28 |
| FBgn0005671 | 488.78  | 52  | 1 | FAEIVQLR               | 42d | 28 |
| FBgn0005671 | 689.43  | 92  | 2 | IPASILAEFYPR           | 42d | 28 |
| FBgn0005671 | 726.86  | 35  | 1 | IPIFSAAGLPHNEIAAQICR   | 42d | 28 |
| FBgn0005671 | 1226.86 | 88  | 2 | IYPEEMIQTGISAIDVMNSIAR | 42d | 28 |
| FBgn0005671 | 792.25  | 70  | 2 | QIYPPVNVLP SLSR        | 42d | 28 |
| FBgn0005671 | 553.14  | 44  | 1 | TPVSEDM LGR            | 42d | 28 |
| FBgn0005671 | 821.14  | 83  | 3 | TVSGVNGPLVILDEVK       | 42d | 28 |
| FBgn0005671 | 727.01  | 60  | 1 | IPIFSAAGLPHNEIAAQICR   | 46d | 28 |
| FBgn0005671 | 671.58  | 46  | 1 | NFISQGNYENR            | 46d | 28 |
| FBgn0005671 | 792.52  | 47  | 1 | QIYPPVNVLP SLSR        | 46d | 28 |
| FBgn0005671 | 553.26  | 48  | 1 | TPVSEDM LGR            | 46d | 28 |
| FBgn0005671 | 761.39  | 92  | 1 | AVVQVFEGTSGIDAK        | 50d | 28 |
| FBgn0005671 | 689.4   | 68  | 1 | IPASILAEFYPR           | 50d | 28 |
| FBgn0005671 | 726.95  | 37  | 1 | IPIFSAAGLPHNEIAAQICR   | 50d | 28 |
| FBgn0005671 | 1226.56 | 46  | 1 | IYPEEMIQTGISAIDVMNSIAR | 50d | 28 |
| FBgn0005671 | 792.61  | 46  | 3 | QIYPPVNVLP SLSR        | 50d | 28 |

|             |         |    |   |                                   |      |    |
|-------------|---------|----|---|-----------------------------------|------|----|
| FBgn0005671 | 820.84  | 48 | 2 | TVSGVNGPLVILDEVK                  | 50d  | 28 |
| FBgn0005671 | 761.31  | 72 | 2 | AVVQVFEGTSGIDAK                   | 52d  | 28 |
| FBgn0005671 | 689.41  | 79 | 1 | IPASILAEFYPR                      | 52d  | 28 |
| FBgn0005671 | 1089.85 | 83 | 1 | IPIFSAAGLPHNEIAAQICR              | 52d  | 28 |
| FBgn0005671 | 1226.66 | 94 | 2 | IYPEEMIQTGISAIDVMNSIAR            | 52d  | 28 |
| FBgn0005671 | 720.33  | 71 | 2 | NTLCEFTGDILR                      | 52d  | 28 |
| FBgn0005671 | 821.03  | 41 | 2 | TVSGVNGPLVILDEVK                  | 52d  | 28 |
| FBgn0005671 | 761.22  | 81 | 1 | AVVQVFEGTSGIDAK                   | 56d  | 28 |
| FBgn0005671 | 689.12  | 79 | 3 | IPASILAEFYPR                      | 56d  | 28 |
| FBgn0005671 | 1226.35 | 98 | 3 | IYPEEMIQTGISAIDVMNSIAR            | 56d  | 28 |
| FBgn0005671 | 792.49  | 59 | 2 | QIYPPVNVLPPLSR                    | 56d  | 28 |
| FBgn0005671 | 767.37  | 42 | 2 | RIPASILAEFYPR                     | 56d  | 28 |
| FBgn0005671 | 821.19  | 71 | 3 | TVSGVNGPLVILDEVK                  | 56d  | 28 |
| FBgn0005674 | 652.11  | 35 | 1 | KASKPEIDAAVKTLLELK                | 22d  | 18 |
| FBgn0005674 | 652.16  | 35 | 2 | KASKPEIDAAVKTLLELK                | 2d   | 28 |
| FBgn0005674 | 651.99  | 35 | 1 | KASKPEIDAAVKTLLELK                | 12d  | 28 |
| FBgn0005674 | 652.16  | 35 | 1 | KASKPEIDAAVKTLLELK                | 36d  | 28 |
| FBgn0005674 | 651.86  | 35 | 2 | KASKPEIDAAVKTLLELK                | 42d  | 28 |
| FBgn0005674 | 652.31  | 35 | 1 | KASKPEIDAAVKTLLELK                | 50d  | 28 |
| FBgn0005771 | 1065.45 | 39 | 1 | SPSGQAKSPKSSTPISSTATSASLSNTSTGEIK | 2d   | 28 |
| FBgn0005776 | 946.16  | 36 | 1 | SVDDSLYPIAVLIDELK                 | 2d   | 18 |
| FBgn0005776 | 1242.04 | 61 | 1 | LAIIEYMPALAGQLGQEFFDQK            | 42d  | 18 |
| FBgn0005776 | 946.16  | 49 | 1 | SVDDSLYPIAVLIDELK                 | 42d  | 18 |
| FBgn0005776 | 1086.51 | 95 | 2 | ISPFLEASVIDAQVKPTLTK              | 62d  | 18 |
| FBgn0005776 | 1241.98 | 55 | 1 | LAIIEYMPALAGQLGQEFFDQK            | 82d  | 18 |
| FBgn0005776 | 945.86  | 56 | 2 | SVDDSLYPIAVLIDELK                 | 82d  | 18 |
| FBgn0005776 | 1241.88 | 58 | 1 | LAIIEYMPALAGQLGQEFFDQK            | 102d | 18 |
| FBgn0005776 | 1242.17 | 54 | 1 | LAIIEYMPALAGQLGQEFFDQK            | 112d | 18 |
| FBgn0005776 | 724.88  | 38 | 1 | ISPFLEASVIDAQVKPTLTK              | 122d | 18 |
| FBgn0005776 | 1086.55 | 74 | 3 | ISPFLEASVIDAQVKPTLTK              | 2d   | 28 |
| FBgn0005776 | 1242.25 | 64 | 1 | LAIIEYMPALAGQLGQEFFDQK            | 12d  | 28 |
| FBgn0005776 | 946.12  | 40 | 1 | SVDDSLYPIAVLIDELK                 | 42d  | 28 |

|             |         |    |   |                            |      |    |
|-------------|---------|----|---|----------------------------|------|----|
| FBgn0005776 | 724.59  | 36 | 1 | ISPFLEASVIDAQVKPTLDK       | 46d  | 28 |
| FBgn0005776 | 1086.63 | 48 | 1 | ISPFLEASVIDAQVKPTLDK       | 52d  | 28 |
| FBgn0005776 | 945.59  | 46 | 1 | SVDDSLYPIAVLIDELK          | 56d  | 28 |
| FBgn0008635 | 1110.85 | 62 | 1 | DNQLGENVFESSLNQALAGSK      | 142d | 18 |
| FBgn0010070 | 945.11  | 34 | 1 | LTNTLANAKTQQSELEK          | 102d | 18 |
| FBgn0010100 | 523.45  | 44 | 1 | APFGDELPAK                 | 2d   | 18 |
| FBgn0010100 | 688.86  | 60 | 3 | FDSDVYLPYEK                | 2d   | 18 |
| FBgn0010100 | 1039.45 | 57 | 2 | GFDPGQDTYTAPPPSGENVK       | 2d   | 18 |
| FBgn0010100 | 602.23  | 73 | 3 | GGTGAIIEYHGK               | 2d   | 18 |
| FBgn0010100 | 1484.69 | 40 | 2 | GHLDNISNNMFIGATNYENNEMNNIK | 2d   | 18 |
| FBgn0010100 | 854.05  | 89 | 2 | LDFNPLTDELTGADGK           | 2d   | 18 |
| FBgn0010100 | 917.84  | 36 | 1 | LDFNPLTDELTGADGKK          | 2d   | 18 |
| FBgn0010100 | 643.99  | 53 | 3 | LKAPFGDELPAK               | 2d   | 18 |
| FBgn0010100 | 850.26  | 71 | 2 | LNHTLNLDLQIGWFK            | 2d   | 18 |
| FBgn0010100 | 1350.68 | 36 | 1 | LQLEPFDKWNGQDLTDLTVLIK     | 2d   | 18 |
| FBgn0010100 | 663.24  | 48 | 2 | SLAPGKPVDAEIK              | 2d   | 18 |
| FBgn0010100 | 618.94  | 35 | 1 | VLYSHLDDPANQDIVR           | 2d   | 18 |
| FBgn0010100 | 814.02  | 71 | 4 | WVAVGDENYEGESSR            | 2d   | 18 |
| FBgn0010100 | 523.14  | 51 | 3 | APFGDELPAK                 | 22d  | 18 |
| FBgn0010100 | 688.43  | 53 | 4 | FDSDVYLPYEK                | 22d  | 18 |
| FBgn0010100 | 1039.35 | 63 | 3 | GFDPGQDTYTAPPPSGENVK       | 22d  | 18 |
| FBgn0010100 | 853.54  | 58 | 1 | LDFNPLTDELTGADGK           | 22d  | 18 |
| FBgn0010100 | 612.48  | 54 | 2 | LDFNPLTDELTGADGKK          | 22d  | 18 |
| FBgn0010100 | 850.46  | 61 | 1 | LNHTLNLDLQIGWFK            | 22d  | 18 |
| FBgn0010100 | 663.34  | 37 | 2 | SLAPGKPVDAEIK              | 22d  | 18 |
| FBgn0010100 | 923.81  | 64 | 1 | VGLIGSCTNSSYEDMGR          | 22d  | 18 |
| FBgn0010100 | 928.51  | 42 | 2 | VLYSHLDDPANQDIVR           | 22d  | 18 |
| FBgn0010100 | 813.76  | 75 | 3 | WVAVGDENYEGESSR            | 22d  | 18 |
| FBgn0010100 | 688.25  | 51 | 3 | FDSDVYLPYEK                | 42d  | 18 |
| FBgn0010100 | 853.81  | 81 | 3 | LDFNPLTDELTGADGK           | 42d  | 18 |
| FBgn0010100 | 917.8   | 64 | 2 | LDFNPLTDELTGADGKK          | 42d  | 18 |
| FBgn0010100 | 850.34  | 72 | 2 | LNHTLNLDLQIGWFK            | 42d  | 18 |



|             |         |    |   |                        |      |    |
|-------------|---------|----|---|------------------------|------|----|
| FBgn0010100 | 663.37  | 43 | 3 | SLAPGKPVDAEIK          | 42d  | 18 |
| FBgn0010100 | 928.41  | 48 | 3 | VLYSHLDDPANQDIVR       | 42d  | 18 |
| FBgn0010100 | 813.68  | 72 | 3 | WVAVGDENYEGSSR         | 42d  | 18 |
| FBgn0010100 | 688.75  | 64 | 2 | FSDVYLPYEK             | 62d  | 18 |
| FBgn0010100 | 1039.46 | 38 | 1 | GFDPGQDTYTAPPPSGENVK   | 62d  | 18 |
| FBgn0010100 | 602.23  | 59 | 2 | GGTGAIEYHGK            | 62d  | 18 |
| FBgn0010100 | 853.81  | 82 | 2 | LDNFPLTDELTGADGK       | 62d  | 18 |
| FBgn0010100 | 918     | 47 | 2 | LDNFPLTDELTGADGKK      | 62d  | 18 |
| FBgn0010100 | 850.43  | 64 | 1 | LNHTLNLDLQIGWFK        | 62d  | 18 |
| FBgn0010100 | 1350.44 | 46 | 1 | LQLEPFDKWNGQDLTDLTVLIK | 62d  | 18 |
| FBgn0010100 | 608.49  | 39 | 1 | NGSWGVPDVAR            | 62d  | 18 |
| FBgn0010100 | 663.59  | 50 | 1 | SLAPGKPVDAEIK          | 62d  | 18 |
| FBgn0010100 | 928.47  | 38 | 1 | VLYSHLDDPANQDIVR       | 62d  | 18 |
| FBgn0010100 | 813.94  | 79 | 4 | WVAVGDENYEGSSR         | 62d  | 18 |
| FBgn0010100 | 523.27  | 46 | 1 | APFGDELPAK             | 82d  | 18 |
| FBgn0010100 | 688.72  | 49 | 1 | FSDVYLPYEK             | 82d  | 18 |
| FBgn0010100 | 1039.54 | 48 | 1 | GFDPGQDTYTAPPPSGENVK   | 82d  | 18 |
| FBgn0010100 | 602.24  | 55 | 1 | GGTGAIEYHGK            | 82d  | 18 |
| FBgn0010100 | 853.86  | 74 | 2 | LDNFPLTDELTGADGK       | 82d  | 18 |
| FBgn0010100 | 918.05  | 34 | 1 | LDNFPLTDELTGADGKK      | 82d  | 18 |
| FBgn0010100 | 850.36  | 64 | 3 | LNHTLNLDLQIGWFK        | 82d  | 18 |
| FBgn0010100 | 663.58  | 54 | 3 | SLAPGKPVDAEIK          | 82d  | 18 |
| FBgn0010100 | 619.47  | 35 | 1 | VLYSHLDDPANQDIVR       | 82d  | 18 |
| FBgn0010100 | 813.89  | 58 | 1 | WVAVGDENYEGSSR         | 82d  | 18 |
| FBgn0010100 | 438.13  | 52 | 1 | AGIASEAQK              | 102d | 18 |
| FBgn0010100 | 688.99  | 75 | 6 | FSDVYLPYEK             | 102d | 18 |
| FBgn0010100 | 853.42  | 71 | 1 | LDNFPLTDELTGADGK       | 102d | 18 |
| FBgn0010100 | 611.75  | 47 | 2 | LDNFPLTDELTGADGKK      | 102d | 18 |
| FBgn0010100 | 586.48  | 51 | 1 | LNRPPLTSEK             | 102d | 18 |
| FBgn0010100 | 608.53  | 46 | 1 | NGSWGVPDVAR            | 102d | 18 |
| FBgn0010100 | 663.24  | 36 | 1 | SLAPGKPVDAEIK          | 102d | 18 |
| FBgn0010100 | 928.7   | 78 | 1 | VLYSHLDDPANQDIVR       | 102d | 18 |

|             |         |    |   |                      |      |    |
|-------------|---------|----|---|----------------------|------|----|
| FBgn0010100 | 688.38  | 71 | 5 | FSDVYLPYEK           | 112d | 18 |
| FBgn0010100 | 1039.71 | 47 | 1 | GFDPGQDTYTAPPPSGENVK | 112d | 18 |
| FBgn0010100 | 853.96  | 65 | 2 | LDNFPLTDELTGADGK     | 112d | 18 |
| FBgn0010100 | 663.46  | 34 | 1 | SLAPGKPVDAEIK        | 112d | 18 |
| FBgn0010100 | 928.08  | 54 | 1 | VLYSHLDDPANQDIVR     | 112d | 18 |
| FBgn0010100 | 438.25  | 48 | 1 | AGIASEAQK            | 122d | 18 |
| FBgn0010100 | 688.41  | 72 | 6 | FSDVYLPYEK           | 122d | 18 |
| FBgn0010100 | 1039.45 | 49 | 1 | GFDPGQDTYTAPPPSGENVK | 122d | 18 |
| FBgn0010100 | 602.22  | 35 | 1 | GGTGAIIEYHGK         | 122d | 18 |
| FBgn0010100 | 853.55  | 82 | 1 | LDNFPLTDELTGADGK     | 122d | 18 |
| FBgn0010100 | 917.13  | 44 | 1 | LDNFPLTDELTGADGKK    | 122d | 18 |
| FBgn0010100 | 643.92  | 38 | 1 | LKAPFGDELPAK         | 122d | 18 |
| FBgn0010100 | 663.36  | 40 | 1 | SLAPGKPVDAEIK        | 122d | 18 |
| FBgn0010100 | 928.39  | 56 | 2 | VLYSHLDDPANQDIVR     | 122d | 18 |
| FBgn0010100 | 813.97  | 76 | 2 | WVAVGDENYEGSSR       | 122d | 18 |
| FBgn0010100 | 522.65  | 46 | 1 | APFGDELPAK           | 132d | 18 |
| FBgn0010100 | 688.75  | 49 | 1 | FSDVYLPYEK           | 132d | 18 |
| FBgn0010100 | 1039.72 | 40 | 2 | GFDPGQDTYTAPPPSGENVK | 132d | 18 |
| FBgn0010100 | 853.63  | 79 | 3 | LDNFPLTDELTGADGK     | 132d | 18 |
| FBgn0010100 | 850.47  | 58 | 1 | LNHTLNLDLQIGWFK      | 132d | 18 |
| FBgn0010100 | 928.66  | 45 | 1 | VLYSHLDDPANQDIVR     | 132d | 18 |
| FBgn0010100 | 814.03  | 51 | 1 | WVAVGDENYEGSSR       | 132d | 18 |
| FBgn0010100 | 687.68  | 64 | 5 | FSDVYLPYEK           | 142d | 18 |
| FBgn0010100 | 1039.73 | 39 | 1 | GFDPGQDTYTAPPPSGENVK | 142d | 18 |
| FBgn0010100 | 853.69  | 69 | 1 | LDNFPLTDELTGADGK     | 142d | 18 |
| FBgn0010100 | 917.91  | 62 | 1 | LDNFPLTDELTGADGKK    | 142d | 18 |
| FBgn0010100 | 608.34  | 43 | 1 | NGSWGVPDVAR          | 142d | 18 |
| FBgn0010100 | 663.3   | 36 | 1 | SLAPGKPVDAEIK        | 142d | 18 |
| FBgn0010100 | 928.66  | 46 | 1 | VLYSHLDDPANQDIVR     | 142d | 18 |
| FBgn0010100 | 813.91  | 70 | 1 | WVAVGDENYEGSSR       | 142d | 18 |
| FBgn0010100 | 523.38  | 45 | 3 | APFGDELPAK           | 2d   | 28 |
| FBgn0010100 | 688.8   | 62 | 4 | FSDVYLPYEK           | 2d   | 28 |

|             |         |    |   |                            |     |    |
|-------------|---------|----|---|----------------------------|-----|----|
| FBgn0010100 | 1039.15 | 55 | 3 | GFDPGQDTYTAPPPSGENVK       | 2d  | 28 |
| FBgn0010100 | 602.35  | 62 | 3 | GGTGAIIEYHGK               | 2d  | 28 |
| FBgn0010100 | 1484.46 | 37 | 1 | GHLDNISNNMFIGATNYENNEMNNIK | 2d  | 28 |
| FBgn0010100 | 853.69  | 78 | 2 | LDNFPLTDELGTADGK           | 2d  | 28 |
| FBgn0010100 | 917.97  | 39 | 2 | LDNFPLTDELGTADGKK          | 2d  | 28 |
| FBgn0010100 | 567.2   | 53 | 2 | LNHTLNLDLQIGWFK            | 2d  | 28 |
| FBgn0010100 | 608.53  | 43 | 1 | NGSWGVPDVAR                | 2d  | 28 |
| FBgn0010100 | 483.98  | 44 | 1 | NGYPMDIR                   | 2d  | 28 |
| FBgn0010100 | 663.24  | 47 | 3 | SLAPGKPVDAEIK              | 2d  | 28 |
| FBgn0010100 | 923.42  | 48 | 1 | VGLIGSCTNSSYEDMGR          | 2d  | 28 |
| FBgn0010100 | 928.12  | 37 | 1 | VLYSHLDDPANQDIVR           | 2d  | 28 |
| FBgn0010100 | 813.94  | 73 | 3 | WVAVGDENYEGSSR             | 2d  | 28 |
| FBgn0010100 | 523.08  | 65 | 3 | APFGDELPAK                 | 12d | 28 |
| FBgn0010100 | 688.84  | 71 | 6 | FSDVYLPYEK                 | 12d | 28 |
| FBgn0010100 | 1039.48 | 41 | 1 | GFDPGQDTYTAPPPSGENVK       | 12d | 28 |
| FBgn0010100 | 730.01  | 48 | 1 | IPFNVTGPSEQIR              | 12d | 28 |
| FBgn0010100 | 853.86  | 95 | 2 | LDNFPLTDELGTADGK           | 12d | 28 |
| FBgn0010100 | 918.18  | 49 | 1 | LDNFPLTDELGTADGKK          | 12d | 28 |
| FBgn0010100 | 643.73  | 57 | 3 | LKAPFGDELPAK               | 12d | 28 |
| FBgn0010100 | 850.36  | 73 | 1 | LNHTLNLDLQIGWFK            | 12d | 28 |
| FBgn0010100 | 1350.74 | 50 | 2 | LQLLEPFDKWNGQDLTDLTVLIK    | 12d | 28 |
| FBgn0010100 | 837.5   | 55 | 1 | SKIPFNVTGPSEQIR            | 12d | 28 |
| FBgn0010100 | 663.48  | 40 | 3 | SLAPGKPVDAEIK              | 12d | 28 |
| FBgn0010100 | 928.3   | 59 | 1 | VLYSHLDDPANQDIVR           | 12d | 28 |
| FBgn0010100 | 813.74  | 87 | 3 | WVAVGDENYEGSSR             | 12d | 28 |
| FBgn0010100 | 523.23  | 37 | 1 | APFGDELPAK                 | 22d | 28 |
| FBgn0010100 | 688.98  | 53 | 4 | FSDVYLPYEK                 | 22d | 28 |
| FBgn0010100 | 1039.5  | 65 | 1 | GFDPGQDTYTAPPPSGENVK       | 22d | 28 |
| FBgn0010100 | 1484.81 | 36 | 1 | GHLDNISNNMFIGATNYENNEMNNIK | 22d | 28 |
| FBgn0010100 | 853.97  | 81 | 2 | LDNFPLTDELGTADGK           | 22d | 28 |
| FBgn0010100 | 612.39  | 47 | 3 | LDNFPLTDELGTADGKK          | 22d | 28 |
| FBgn0010100 | 850.01  | 63 | 3 | LNHTLNLDLQIGWFK            | 22d | 28 |

|             |         |    |   |                     |     |    |
|-------------|---------|----|---|---------------------|-----|----|
| FBgn0010100 | 928.42  | 43 | 3 | VLYSHLDDPANQDIVR    | 22d | 28 |
| FBgn0010100 | 813.67  | 95 | 3 | WVAVGDENYEGSSR      | 22d | 28 |
| FBgn0010100 | 523.52  | 43 | 3 | APFGDELPAK          | 32d | 28 |
| FBgn0010100 | 688.66  | 54 | 3 | FSDVYLPYEK          | 32d | 28 |
| FBgn0010100 | 1039.6  | 56 | 3 | GFDPGQDTYTAPPPGENVK | 32d | 28 |
| FBgn0010100 | 853.64  | 95 | 2 | LDNFPLTDELTGADGK    | 32d | 28 |
| FBgn0010100 | 917.83  | 53 | 1 | LDNFPLTDELTGADGKK   | 32d | 28 |
| FBgn0010100 | 850.55  | 54 | 2 | LNHTLNLDLQIGWFK     | 32d | 28 |
| FBgn0010100 | 663.56  | 38 | 1 | SLAPGKPVDAEIK       | 32d | 28 |
| FBgn0010100 | 923.66  | 85 | 3 | VGLIGSCTNSSYEDMGR   | 32d | 28 |
| FBgn0010100 | 928.46  | 47 | 1 | VLYSHLDDPANQDIVR    | 32d | 28 |
| FBgn0010100 | 813.68  | 72 | 2 | WVAVGDENYEGSSR      | 32d | 28 |
| FBgn0010100 | 523.24  | 48 | 3 | APFGDELPAK          | 36d | 28 |
| FBgn0010100 | 688.98  | 66 | 1 | FSDVYLPYEK          | 36d | 28 |
| FBgn0010100 | 1039.33 | 74 | 3 | GFDPGQDTYTAPPPGENVK | 36d | 28 |
| FBgn0010100 | 853.71  | 72 | 1 | LDNFPLTDELTGADGK    | 36d | 28 |
| FBgn0010100 | 917.86  | 40 | 1 | LDNFPLTDELTGADGKK   | 36d | 28 |
| FBgn0010100 | 850.32  | 74 | 3 | LNHTLNLDLQIGWFK     | 36d | 28 |
| FBgn0010100 | 608.25  | 43 | 1 | NGSWGVPDVAR         | 36d | 28 |
| FBgn0010100 | 483.94  | 36 | 1 | NGYPMDIR            | 36d | 28 |
| FBgn0010100 | 663.14  | 38 | 1 | SLAPGKPVDAEIK       | 36d | 28 |
| FBgn0010100 | 923.64  | 73 | 2 | VGLIGSCTNSSYEDMGR   | 36d | 28 |
| FBgn0010100 | 619.29  | 40 | 2 | VLYSHLDDPANQDIVR    | 36d | 28 |
| FBgn0010100 | 813.64  | 75 | 3 | WVAVGDENYEGSSR      | 36d | 28 |
| FBgn0010100 | 438.28  | 47 | 1 | AGIASEAQK           | 42d | 28 |
| FBgn0010100 | 523.32  | 40 | 2 | APFGDELPAK          | 42d | 28 |
| FBgn0010100 | 779.39  | 44 | 1 | CTTDHISAAGPWLK      | 42d | 28 |
| FBgn0010100 | 505.92  | 38 | 1 | DGISEVFDK           | 42d | 28 |
| FBgn0010100 | 688.92  | 66 | 5 | FSDVYLPYEK          | 42d | 28 |
| FBgn0010100 | 1039.3  | 55 | 3 | GFDPGQDTYTAPPPGENVK | 42d | 28 |
| FBgn0010100 | 853.83  | 47 | 1 | LDNFPLTDELTGADGK    | 42d | 28 |
| FBgn0010100 | 918.09  | 68 | 2 | LDNFPLTDELTGADGKK   | 42d | 28 |

|             |         |    |   |                            |     |    |
|-------------|---------|----|---|----------------------------|-----|----|
| FBgn0010100 | 567.33  | 59 | 2 | LNHTLNDLQIGWFK             | 42d | 28 |
| FBgn0010100 | 663.37  | 34 | 1 | SLAPGKPVDAEIK              | 42d | 28 |
| FBgn0010100 | 924.06  | 80 | 3 | VGLIGSCTNSSYEDMGR          | 42d | 28 |
| FBgn0010100 | 928.35  | 58 | 3 | VLYSHLDDPANQDIVR           | 42d | 28 |
| FBgn0010100 | 813.82  | 66 | 1 | WVAVGDENYEGSSR             | 42d | 28 |
| FBgn0010100 | 523.42  | 40 | 2 | APFGDELPAK                 | 46d | 28 |
| FBgn0010100 | 689.03  | 64 | 2 | FDSDVYLPYEK                | 46d | 28 |
| FBgn0010100 | 1039.39 | 76 | 3 | GFDPGQDTYTAPPPSGENVK       | 46d | 28 |
| FBgn0010100 | 853.79  | 84 | 1 | LDNFPLTDELTGADGK           | 46d | 28 |
| FBgn0010100 | 917.81  | 72 | 3 | LDNFPLTDELTGADGKK          | 46d | 28 |
| FBgn0010100 | 850.52  | 52 | 3 | LNHTLNDLQIGWFK             | 46d | 28 |
| FBgn0010100 | 608.47  | 34 | 1 | NGSWGVPDVAR                | 46d | 28 |
| FBgn0010100 | 663.41  | 52 | 1 | SLAPGKPVDAEIK              | 46d | 28 |
| FBgn0010100 | 923.77  | 72 | 2 | VGLIGSCTNSSYEDMGR          | 46d | 28 |
| FBgn0010100 | 928.4   | 40 | 1 | VLYSHLDDPANQDIVR           | 46d | 28 |
| FBgn0010100 | 814.02  | 77 | 2 | WVAVGDENYEGSSR             | 46d | 28 |
| FBgn0010100 | 523.29  | 49 | 3 | APFGDELPAK                 | 50d | 28 |
| FBgn0010100 | 688.74  | 57 | 3 | FDSDVYLPYEK                | 50d | 28 |
| FBgn0010100 | 1039.22 | 59 | 2 | GFDPGQDTYTAPPPSGENVK       | 50d | 28 |
| FBgn0010100 | 602.53  | 48 | 2 | GGTGAIIHYHGK               | 50d | 28 |
| FBgn0010100 | 990.01  | 52 | 1 | GHLDNISNNMFIGATNYENNEMNNIK | 50d | 28 |
| FBgn0010100 | 729.67  | 35 | 2 | IPFNVTGPSEQIR              | 50d | 28 |
| FBgn0010100 | 854.14  | 65 | 1 | LDNFPLTDELTGADGK           | 50d | 28 |
| FBgn0010100 | 918.17  | 44 | 1 | LDNFPLTDELTGADGKK          | 50d | 28 |
| FBgn0010100 | 850.49  | 68 | 3 | LNHTLNDLQIGWFK             | 50d | 28 |
| FBgn0010100 | 663.41  | 58 | 2 | SLAPGKPVDAEIK              | 50d | 28 |
| FBgn0010100 | 923.7   | 76 | 3 | VGLIGSCTNSSYEDMGR          | 50d | 28 |
| FBgn0010100 | 813.76  | 77 | 3 | WVAVGDENYEGSSR             | 50d | 28 |
| FBgn0010100 | 523.22  | 61 | 1 | APFGDELPAK                 | 52d | 28 |
| FBgn0010100 | 688.66  | 64 | 2 | FDSDVYLPYEK                | 52d | 28 |
| FBgn0010100 | 1039.33 | 83 | 2 | GFDPGQDTYTAPPPSGENVK       | 52d | 28 |
| FBgn0010100 | 918.21  | 52 | 1 | LDNFPLTDELTGADGKK          | 52d | 28 |

|             |         |    |   |                        |      |    |
|-------------|---------|----|---|------------------------|------|----|
| FBgn0010100 | 850.6   | 53 | 2 | LNHTLNDLQIGWFK         | 52d  | 28 |
| FBgn0010100 | 663.47  | 44 | 3 | SLAPGKPVDAEIK          | 52d  | 28 |
| FBgn0010100 | 924.03  | 84 | 3 | VGLIGSCTNSSYEDMGR      | 52d  | 28 |
| FBgn0010100 | 813.9   | 67 | 2 | WVAVGDENYEGESSR        | 52d  | 28 |
| FBgn0010100 | 438.25  | 38 | 1 | AGIASEAQK              | 56d  | 28 |
| FBgn0010100 | 688.71  | 65 | 3 | FSDVYLPYEK             | 56d  | 28 |
| FBgn0010100 | 602.26  | 42 | 1 | GGTGAIIEYHGK           | 56d  | 28 |
| FBgn0010100 | 853.87  | 92 | 3 | LDFNPLTDELTDGADGK      | 56d  | 28 |
| FBgn0010100 | 917.94  | 53 | 2 | LDFNPLTDELTDGADGKK     | 56d  | 28 |
| FBgn0010100 | 567.39  | 60 | 3 | LNHTLNDLQIGWFK         | 56d  | 28 |
| FBgn0010100 | 663.32  | 53 | 1 | SLAPGKPVDAEIK          | 56d  | 28 |
| FBgn0010213 | 847.78  | 61 | 2 | LPYDYAALEPIICR         | 22d  | 18 |
| FBgn0010213 | 847.8   | 42 | 1 | LPYDYAALEPIICR         | 42d  | 18 |
| FBgn0010213 | 847.92  | 58 | 1 | LPYDYAALEPIICR         | 82d  | 18 |
| FBgn0010213 | 848.01  | 43 | 1 | LPYDYAALEPIICR         | 122d | 18 |
| FBgn0010213 | 847.92  | 37 | 1 | LPYDYAALEPIICR         | 142d | 18 |
| FBgn0010213 | 847.85  | 46 | 1 | LPYDYAALEPIICR         | 2d   | 28 |
| FBgn0010213 | 847.9   | 60 | 1 | LPYDYAALEPIICR         | 32d  | 28 |
| FBgn0010213 | 848.07  | 65 | 1 | LPYDYAALEPIICR         | 52d  | 28 |
| FBgn0010217 | 663.71  | 38 | 1 | AIAELGIYPAVDPLDSTSR    | 2d   | 18 |
| FBgn0010217 | 961.59  | 91 | 6 | DQEGQDVLLFIDNIFR       | 2d   | 18 |
| FBgn0010217 | 991.43  | 81 | 2 | EGNDLYNEMIEGGVISLK     | 2d   | 18 |
| FBgn0010217 | 982.5   | 99 | 5 | FLSQPFQVAEVFTGHAGK     | 2d   | 18 |
| FBgn0010217 | 718.89  | 87 | 3 | FTQAGSEVSALLGR         | 2d   | 18 |
| FBgn0010217 | 488.96  | 51 | 3 | IGLFGGAGVGK            | 2d   | 18 |
| FBgn0010217 | 684.98  | 72 | 3 | IINVIGEPIDER           | 2d   | 18 |
| FBgn0010217 | 935.94  | 73 | 2 | IMDPNIIGQEHYNVAR       | 2d   | 18 |
| FBgn0010217 | 1127.05 | 56 | 1 | IPSAVGYQPTLATDMGSMQER  | 2d   | 18 |
| FBgn0010217 | 507.36  | 52 | 4 | IPVGAETLGR             | 2d   | 18 |
| FBgn0010217 | 840     | 80 | 3 | LVLEVAQHLGENTVR        | 2d   | 18 |
| FBgn0010217 | 521.31  | 38 | 1 | LVPLEQTIK              | 2d   | 18 |
| FBgn0010217 | 1330.79 | 81 | 4 | SLQDIILGMDELSEEDKLTVAR | 2d   | 18 |

|             |         |    |   |                            |     |    |
|-------------|---------|----|---|----------------------------|-----|----|
| FBgn0010217 | 1406.8  | 38 | 1 | TAAIHAEAPEFVQMSVEQEILVTGIK | 2d  | 18 |
| FBgn0010217 | 632.27  | 55 | 2 | TIAMDGTEGLVR               | 2d  | 18 |
| FBgn0010217 | 729.93  | 71 | 5 | TVLIMELINNVAK              | 2d  | 18 |
| FBgn0010217 | 721.07  | 90 | 2 | VALTGLTVAEYFR              | 2d  | 18 |
| FBgn0010217 | 801.81  | 83 | 3 | VALVYQMNPEPPGAR            | 2d  | 18 |
| FBgn0010217 | 517.87  | 63 | 5 | VLDTGYPPIR                 | 2d  | 18 |
| FBgn0010217 | 545.29  | 45 | 1 | VVDLLAPYAK                 | 2d  | 18 |
| FBgn0010217 | 995.14  | 53 | 2 | AIAELGIYPAVDPLDSTSR        | 22d | 18 |
| FBgn0010217 | 991.34  | 86 | 3 | EGNDLYNEMIEGGVISLK         | 22d | 18 |
| FBgn0010217 | 719.02  | 86 | 4 | FTQAGSEVSALLGR             | 22d | 18 |
| FBgn0010217 | 488.77  | 49 | 3 | IGLFGGAGVGK                | 22d | 18 |
| FBgn0010217 | 685.05  | 62 | 5 | IINVIGEPIDER               | 22d | 18 |
| FBgn0010217 | 1127.06 | 54 | 2 | IPSAVGYQPTLATDMGSMQER      | 22d | 18 |
| FBgn0010217 | 507.41  | 49 | 3 | IPVGAETLGR                 | 22d | 18 |
| FBgn0010217 | 840.04  | 77 | 4 | LVLEVAQHLGENTVR            | 22d | 18 |
| FBgn0010217 | 521.57  | 48 | 2 | LVPLEQTIK                  | 22d | 18 |
| FBgn0010217 | 632.46  | 67 | 3 | TIAMDGTEGLVR               | 22d | 18 |
| FBgn0010217 | 730.07  | 72 | 1 | TVLIMELINNVAK              | 22d | 18 |
| FBgn0010217 | 720.97  | 87 | 2 | VALTGLTVAEYFR              | 22d | 18 |
| FBgn0010217 | 801.79  | 64 | 1 | VALVYQMNPEPPGAR            | 22d | 18 |
| FBgn0010217 | 517.82  | 63 | 3 | VLDTGYPPIR                 | 22d | 18 |
| FBgn0010217 | 994.99  | 63 | 5 | AIAELGIYPAVDPLDSTSR        | 42d | 18 |
| FBgn0010217 | 961.93  | 83 | 3 | DQEGQDVLLFIDNIFR           | 42d | 18 |
| FBgn0010217 | 991.69  | 71 | 2 | EGNDLYNEMIEGGVISLK         | 42d | 18 |
| FBgn0010217 | 982.46  | 81 | 3 | FLSQPFQVAEVFTGHAGK         | 42d | 18 |
| FBgn0010217 | 719.12  | 83 | 3 | FTQAGSEVSALLGR             | 42d | 18 |
| FBgn0010217 | 488.73  | 42 | 3 | IGLFGGAGVGK                | 42d | 18 |
| FBgn0010217 | 684.95  | 60 | 3 | IINVIGEPIDER               | 42d | 18 |
| FBgn0010217 | 935.86  | 62 | 3 | IMDPNIIGQEHYNVAR           | 42d | 18 |
| FBgn0010217 | 751.79  | 53 | 3 | IPSAVGYQPTLATDMGSMQER      | 42d | 18 |
| FBgn0010217 | 507.27  | 52 | 3 | IPVGAETLGR                 | 42d | 18 |
| FBgn0010217 | 839.91  | 72 | 3 | LVLEVAQHLGENTVR            | 42d | 18 |

|             |         |    |   |                            |     |    |
|-------------|---------|----|---|----------------------------|-----|----|
| FBgn0010217 | 521.41  | 43 | 2 | LVPLEQTIK                  | 42d | 18 |
| FBgn0010217 | 938.32  | 34 | 1 | TAAIHAEAPEFVQMSVEQEILVTGIK | 42d | 18 |
| FBgn0010217 | 632.3   | 61 | 4 | TIAMDGTEGLVR               | 42d | 18 |
| FBgn0010217 | 729.83  | 74 | 9 | TVLIMELINNVAK              | 42d | 18 |
| FBgn0010217 | 720.87  | 88 | 8 | VALTGLTVAEYFR              | 42d | 18 |
| FBgn0010217 | 801.81  | 74 | 2 | VALVYQMNEPPGAR             | 42d | 18 |
| FBgn0010217 | 517.84  | 63 | 2 | VLDTGYPPIR                 | 42d | 18 |
| FBgn0010217 | 545.36  | 44 | 3 | VVDLLAPYAK                 | 42d | 18 |
| FBgn0010217 | 994.48  | 53 | 3 | AIAELGIYPAVDPLDSTSR        | 62d | 18 |
| FBgn0010217 | 962.1   | 78 | 6 | DQEGQDVLLFIDNIFR           | 62d | 18 |
| FBgn0010217 | 991.16  | 60 | 1 | EGNDLYNEMIEGGVISLK         | 62d | 18 |
| FBgn0010217 | 718.99  | 95 | 4 | FTQAGSEVSALLGR             | 62d | 18 |
| FBgn0010217 | 489     | 48 | 2 | IGLFGGAGVGK                | 62d | 18 |
| FBgn0010217 | 685.01  | 66 | 5 | IINVIGEPIDER               | 62d | 18 |
| FBgn0010217 | 507.43  | 62 | 6 | IPVGAETLGR                 | 62d | 18 |
| FBgn0010217 | 840.14  | 76 | 3 | LVLEVAQHLGENTVR            | 62d | 18 |
| FBgn0010217 | 521.37  | 39 | 1 | LVPLEQTIK                  | 62d | 18 |
| FBgn0010217 | 887.47  | 70 | 6 | SLQDIIAILGMDELSEEDKLTVAR   | 62d | 18 |
| FBgn0010217 | 730.01  | 76 | 8 | TVLIMELINNVAK              | 62d | 18 |
| FBgn0010217 | 720.79  | 87 | 2 | VALTGLTVAEYFR              | 62d | 18 |
| FBgn0010217 | 517.99  | 55 | 6 | VLDTGYPPIR                 | 62d | 18 |
| FBgn0010217 | 545.24  | 40 | 1 | VVDLLAPYAK                 | 62d | 18 |
| FBgn0010217 | 994.86  | 60 | 3 | AIAELGIYPAVDPLDSTSR        | 82d | 18 |
| FBgn0010217 | 962.22  | 92 | 7 | DQEGQDVLLFIDNIFR           | 82d | 18 |
| FBgn0010217 | 991.4   | 83 | 2 | EGNDLYNEMIEGGVISLK         | 82d | 18 |
| FBgn0010217 | 718.86  | 85 | 4 | FTQAGSEVSALLGR             | 82d | 18 |
| FBgn0010217 | 685.07  | 66 | 5 | IINVIGEPIDER               | 82d | 18 |
| FBgn0010217 | 1127.02 | 55 | 1 | IPSAVGYQPTLATDMGSMQER      | 82d | 18 |
| FBgn0010217 | 507.15  | 60 | 4 | IPVGAETLGR                 | 82d | 18 |
| FBgn0010217 | 840.19  | 68 | 4 | LVLEVAQHLGENTVR            | 82d | 18 |
| FBgn0010217 | 521.11  | 37 | 2 | LVPLEQTIK                  | 82d | 18 |
| FBgn0010217 | 1330.06 | 60 | 2 | SLQDIIAILGMDELSEEDKLTVAR   | 82d | 18 |



|             |         |     |   |                            |      |    |
|-------------|---------|-----|---|----------------------------|------|----|
| FBgn0010217 | 938.1   | 47  | 2 | TAAIHAEAPEFVQMSVEQEILVTGIK | 82d  | 18 |
| FBgn0010217 | 632.21  | 57  | 1 | TIAMDGTEGLVR               | 82d  | 18 |
| FBgn0010217 | 729.94  | 78  | 7 | TVLIMELINNVAK              | 82d  | 18 |
| FBgn0010217 | 720.47  | 53  | 1 | VALTGLTVAEYFR              | 82d  | 18 |
| FBgn0010217 | 517.92  | 63  | 5 | VLDTGYPPIR                 | 82d  | 18 |
| FBgn0010217 | 994.75  | 42  | 1 | AIAELGIYPAVDPLDSTSR        | 102d | 18 |
| FBgn0010217 | 961.72  | 76  | 2 | DQEGQDVLLFIDNIFR           | 102d | 18 |
| FBgn0010217 | 990.99  | 92  | 1 | EGNDLYNEMIEGGVISLK         | 102d | 18 |
| FBgn0010217 | 982.31  | 52  | 2 | FLSQPFQVAEVFTGHAGK         | 102d | 18 |
| FBgn0010217 | 718.75  | 91  | 3 | FTQAGSEVSALLGR             | 102d | 18 |
| FBgn0010217 | 684.87  | 72  | 6 | IINVIGEPIDER               | 102d | 18 |
| FBgn0010217 | 1126.79 | 63  | 2 | IPSAVGYQPTLATDMGSMQER      | 102d | 18 |
| FBgn0010217 | 839.88  | 68  | 3 | LVLEVAQHLGENTVR            | 102d | 18 |
| FBgn0010217 | 521.35  | 35  | 1 | LVPLEQTIK                  | 102d | 18 |
| FBgn0010217 | 1330.64 | 76  | 2 | SLQDIAILGMDELSEEDKLTVAR    | 102d | 18 |
| FBgn0010217 | 1406.91 | 36  | 1 | TAAIHAEAPEFVQMSVEQEILVTGIK | 102d | 18 |
| FBgn0010217 | 721.08  | 120 | 3 | VALTGLTVAEYFR              | 102d | 18 |
| FBgn0010217 | 802.11  | 67  | 1 | VALVYGQMNEPPGAR            | 102d | 18 |
| FBgn0010217 | 544.95  | 49  | 2 | VVDLLAPYAK                 | 102d | 18 |
| FBgn0010217 | 994.9   | 45  | 1 | AIAELGIYPAVDPLDSTSR        | 112d | 18 |
| FBgn0010217 | 991.44  | 81  | 2 | EGNDLYNEMIEGGVISLK         | 112d | 18 |
| FBgn0010217 | 982.59  | 82  | 3 | FLSQPFQVAEVFTGHAGK         | 112d | 18 |
| FBgn0010217 | 718.77  | 91  | 4 | FTQAGSEVSALLGR             | 112d | 18 |
| FBgn0010217 | 488.61  | 47  | 2 | IGLFGGAGVGK                | 112d | 18 |
| FBgn0010217 | 684.94  | 72  | 5 | IINVIGEPIDER               | 112d | 18 |
| FBgn0010217 | 935.89  | 41  | 1 | IMDPNIIGQEHYNVAR           | 112d | 18 |
| FBgn0010217 | 1127.26 | 106 | 2 | IPSAVGYQPTLATDMGSMQER      | 112d | 18 |
| FBgn0010217 | 1406.88 | 36  | 1 | TAAIHAEAPEFVQMSVEQEILVTGIK | 112d | 18 |
| FBgn0010217 | 729.04  | 91  | 8 | TVLIMELINNVAK              | 112d | 18 |
| FBgn0010217 | 720.57  | 97  | 4 | VALTGLTVAEYFR              | 112d | 18 |
| FBgn0010217 | 801.53  | 62  | 1 | VALVYGQMNEPPGAR            | 112d | 18 |
| FBgn0010217 | 517.83  | 62  | 1 | VLDTGYPPIR                 | 112d | 18 |

|             |         |     |   |                            |      |    |
|-------------|---------|-----|---|----------------------------|------|----|
| FBgn0010217 | 545.33  | 40  | 1 | VVDLLAPYAK                 | 112d | 18 |
| FBgn0010217 | 995.07  | 44  | 3 | AIAELGIYPAVDPLDSTSR        | 122d | 18 |
| FBgn0010217 | 961.91  | 38  | 1 | DQEGQDVLLFIDNIFR           | 122d | 18 |
| FBgn0010217 | 991.6   | 92  | 2 | EGNDLYNEMIEGGVISLK         | 122d | 18 |
| FBgn0010217 | 982.69  | 55  | 2 | FLSQPFQVAEVFTGHAGK         | 122d | 18 |
| FBgn0010217 | 718.77  | 91  | 4 | FTQAGSEVSALLGR             | 122d | 18 |
| FBgn0010217 | 489.01  | 52  | 3 | IGLFGGAGVGK                | 122d | 18 |
| FBgn0010217 | 685.1   | 59  | 5 | IINVIGEPIDER               | 122d | 18 |
| FBgn0010217 | 936     | 58  | 1 | IMDPNIIGQEHYNVAR           | 122d | 18 |
| FBgn0010217 | 751.42  | 65  | 2 | IPSAVGYQPTLATDMGSMQER      | 122d | 18 |
| FBgn0010217 | 507.39  | 47  | 3 | IPVGAETLGR                 | 122d | 18 |
| FBgn0010217 | 560.17  | 55  | 3 | LVLEVAQHLGENTVR            | 122d | 18 |
| FBgn0010217 | 1330.93 | 71  | 2 | SLQDIHAILGMDELSEEDKLTVAR   | 122d | 18 |
| FBgn0010217 | 632.41  | 52  | 1 | TIAMDGTEGLVR               | 122d | 18 |
| FBgn0010217 | 729.33  | 78  | 5 | TVLIMELINNVAK              | 122d | 18 |
| FBgn0010217 | 720.61  | 97  | 3 | VALTGLTVAEYFR              | 122d | 18 |
| FBgn0010217 | 801.71  | 80  | 1 | VALVYQMNEPPGAR             | 122d | 18 |
| FBgn0010217 | 517.88  | 55  | 1 | VLDTGYPPIR                 | 122d | 18 |
| FBgn0010217 | 545.14  | 49  | 2 | VVDLLAPYAK                 | 122d | 18 |
| FBgn0010217 | 994.73  | 59  | 1 | AIAELGIYPAVDPLDSTSR        | 132d | 18 |
| FBgn0010217 | 991.05  | 71  | 2 | EGNDLYNEMIEGGVISLK         | 132d | 18 |
| FBgn0010217 | 655.4   | 66  | 2 | FLSQPFQVAEVFTGHAGK         | 132d | 18 |
| FBgn0010217 | 718.38  | 100 | 4 | FTQAGSEVSALLGR             | 132d | 18 |
| FBgn0010217 | 488.89  | 54  | 3 | IGLFGGAGVGK                | 132d | 18 |
| FBgn0010217 | 685.09  | 59  | 2 | IINVIGEPIDER               | 132d | 18 |
| FBgn0010217 | 624.25  | 36  | 1 | IMDPNIIGQEHYNVAR           | 132d | 18 |
| FBgn0010217 | 1127.06 | 64  | 2 | IPSAVGYQPTLATDMGSMQER      | 132d | 18 |
| FBgn0010217 | 507.29  | 53  | 3 | IPVGAETLGR                 | 132d | 18 |
| FBgn0010217 | 840     | 67  | 2 | LVLEVAQHLGENTVR            | 132d | 18 |
| FBgn0010217 | 521.43  | 35  | 3 | LVPLEQTIK                  | 132d | 18 |
| FBgn0010217 | 1330.14 | 62  | 1 | SLQDIHAILGMDELSEEDKLTVAR   | 132d | 18 |
| FBgn0010217 | 1406.7  | 42  | 2 | TAAIHAEAPEFVQMSVEQEILVTGIK | 132d | 18 |

|             |         |    |   |                          |      |    |
|-------------|---------|----|---|--------------------------|------|----|
| FBgn0010217 | 632.27  | 55 | 1 | TIAMDGTEGLVR             | 132d | 18 |
| FBgn0010217 | 730.04  | 83 | 8 | TVLIMELINNVAK            | 132d | 18 |
| FBgn0010217 | 721.13  | 94 | 2 | VALTGLTVAEYFR            | 132d | 18 |
| FBgn0010217 | 801.9   | 67 | 1 | VALVYQMNPEPPGAR          | 132d | 18 |
| FBgn0010217 | 518.02  | 68 | 3 | VLDGTGYPIR               | 132d | 18 |
| FBgn0010217 | 545.4   | 46 | 2 | VVDLLAPYAK               | 132d | 18 |
| FBgn0010217 | 994.86  | 45 | 1 | AIAELGIYPAVDPLDSTSR      | 142d | 18 |
| FBgn0010217 | 962.23  | 62 | 1 | DQEGQDVLLFIDNIFR         | 142d | 18 |
| FBgn0010217 | 991.51  | 89 | 1 | EGNDLYNEMIEGGVISLK       | 142d | 18 |
| FBgn0010217 | 982.67  | 60 | 2 | FLSQPFQVAEVFTGHAGK       | 142d | 18 |
| FBgn0010217 | 718.92  | 91 | 5 | FTQAGSEVSALLGR           | 142d | 18 |
| FBgn0010217 | 488.83  | 47 | 2 | IGLFGGAGVGK              | 142d | 18 |
| FBgn0010217 | 684.88  | 72 | 5 | IINVIGEPIDER             | 142d | 18 |
| FBgn0010217 | 936     | 63 | 1 | IMDPNIIGQEHYNVAR         | 142d | 18 |
| FBgn0010217 | 1127.18 | 67 | 2 | IPSAVGYQPTLATDMGSMQER    | 142d | 18 |
| FBgn0010217 | 507.45  | 50 | 3 | IPVGAETLGR               | 142d | 18 |
| FBgn0010217 | 839.88  | 60 | 3 | LVLEVAQHLGENTVR          | 142d | 18 |
| FBgn0010217 | 1330.63 | 58 | 1 | SLQDIHAILGMDELSEEDKLTVAR | 142d | 18 |
| FBgn0010217 | 632.44  | 50 | 1 | TIAMDGTEGLVR             | 142d | 18 |
| FBgn0010217 | 729.6   | 82 | 4 | TVLIMELINNVAK            | 142d | 18 |
| FBgn0010217 | 720.71  | 97 | 3 | VALTGLTVAEYFR            | 142d | 18 |
| FBgn0010217 | 545.37  | 47 | 4 | VVDLLAPYAK               | 142d | 18 |
| FBgn0010217 | 994.87  | 36 | 1 | AIAELGIYPAVDPLDSTSR      | 2d   | 28 |
| FBgn0010217 | 961.76  | 79 | 5 | DQEGQDVLLFIDNIFR         | 2d   | 28 |
| FBgn0010217 | 991.03  | 77 | 3 | EGNDLYNEMIEGGVISLK       | 2d   | 28 |
| FBgn0010217 | 655.39  | 87 | 5 | FLSQPFQVAEVFTGHAGK       | 2d   | 28 |
| FBgn0010217 | 488.99  | 44 | 3 | IGLFGGAGVGK              | 2d   | 28 |
| FBgn0010217 | 685.1   | 66 | 4 | IINVIGEPIDER             | 2d   | 28 |
| FBgn0010217 | 936.16  | 69 | 3 | IMDPNIIGQEHYNVAR         | 2d   | 28 |
| FBgn0010217 | 751.84  | 61 | 2 | IPSAVGYQPTLATDMGSMQER    | 2d   | 28 |
| FBgn0010217 | 507.03  | 50 | 7 | IPVGAETLGR               | 2d   | 28 |
| FBgn0010217 | 839.81  | 77 | 3 | LVLEVAQHLGENTVR          | 2d   | 28 |

|             |         |     |   |                            |     |    |
|-------------|---------|-----|---|----------------------------|-----|----|
| FBgn0010217 | 520.9   | 43  | 1 | LVPLEQTIK                  | 2d  | 28 |
| FBgn0010217 | 1330.75 | 96  | 3 | SLQDIIAILGMDELSEEDKLTVAR   | 2d  | 28 |
| FBgn0010217 | 1406.98 | 72  | 1 | TAAIHAEAPEFVQMSVEQEILVTGIK | 2d  | 28 |
| FBgn0010217 | 632.39  | 55  | 3 | TIAMDGTEGLVR               | 2d  | 28 |
| FBgn0010217 | 729.86  | 74  | 3 | TVLIMELINNVAK              | 2d  | 28 |
| FBgn0010217 | 721.13  | 99  | 3 | VALTGLTVAEYFR              | 2d  | 28 |
| FBgn0010217 | 801.83  | 73  | 3 | VALVYQMNEPPGAR             | 2d  | 28 |
| FBgn0010217 | 517.72  | 60  | 3 | VLDTGYPPIR                 | 2d  | 28 |
| FBgn0010217 | 545.09  | 56  | 4 | VVDLLAPYAK                 | 2d  | 28 |
| FBgn0010217 | 994.9   | 61  | 1 | AIAELGIYPAVDPLDSTSR        | 12d | 28 |
| FBgn0010217 | 961.13  | 50  | 4 | DQEGQDVLLFIDNIFR           | 12d | 28 |
| FBgn0010217 | 991.62  | 108 | 3 | EGNDLYNEMIEGGVISLK         | 12d | 28 |
| FBgn0010217 | 655.3   | 70  | 3 | FLSQPFQVAEVFTGHAGK         | 12d | 28 |
| FBgn0010217 | 718.76  | 99  | 3 | FTQAGSEVSALLGR             | 12d | 28 |
| FBgn0010217 | 488.74  | 46  | 3 | IGLFGGAGVGK                | 12d | 28 |
| FBgn0010217 | 684.76  | 66  | 6 | IINVIGEPIDER               | 12d | 28 |
| FBgn0010217 | 935.92  | 65  | 2 | IMDPNIIGQEHYNVAR           | 12d | 28 |
| FBgn0010217 | 1126.96 | 68  | 2 | IPSAVGYQPTLATDMGSMQER      | 12d | 28 |
| FBgn0010217 | 507     | 53  | 7 | IPVGAETLGR                 | 12d | 28 |
| FBgn0010217 | 839.82  | 89  | 3 | LVLEVAQHLGENTVR            | 12d | 28 |
| FBgn0010217 | 1330.67 | 78  | 6 | SLQDIIAILGMDELSEEDKLTVAR   | 12d | 28 |
| FBgn0010217 | 1406.93 | 56  | 2 | TAAIHAEAPEFVQMSVEQEILVTGIK | 12d | 28 |
| FBgn0010217 | 632.08  | 67  | 6 | TIAMDGTEGLVR               | 12d | 28 |
| FBgn0010217 | 729.77  | 82  | 7 | TVLIMELINNVAK              | 12d | 28 |
| FBgn0010217 | 721.02  | 94  | 3 | VALTGLTVAEYFR              | 12d | 28 |
| FBgn0010217 | 801.82  | 91  | 3 | VALVYQMNEPPGAR             | 12d | 28 |
| FBgn0010217 | 517.76  | 63  | 3 | VLDTGYPPIR                 | 12d | 28 |
| FBgn0010217 | 545.4   | 45  | 1 | VVDLLAPYAK                 | 12d | 28 |
| FBgn0010217 | 995.15  | 54  | 1 | AIAELGIYPAVDPLDSTSR        | 22d | 28 |
| FBgn0010217 | 991.69  | 78  | 3 | EGNDLYNEMIEGGVISLK         | 22d | 28 |
| FBgn0010217 | 654.95  | 49  | 3 | FLSQPFQVAEVFTGHAGK         | 22d | 28 |
| FBgn0010217 | 718.81  | 88  | 6 | FTQAGSEVSALLGR             | 22d | 28 |

|             |         |    |   |                          |     |    |
|-------------|---------|----|---|--------------------------|-----|----|
| FBgn0010217 | 488.66  | 49 | 2 | IGLFGGAGVGK              | 22d | 28 |
| FBgn0010217 | 684.91  | 62 | 4 | IINVIGEPIDER             | 22d | 28 |
| FBgn0010217 | 935.86  | 66 | 3 | IMDPNIIGQEHYNVAR         | 22d | 28 |
| FBgn0010217 | 751.52  | 68 | 3 | IPSAVGYQPTLATDMGSMQER    | 22d | 28 |
| FBgn0010217 | 507.28  | 46 | 2 | IPVGAETLGR               | 22d | 28 |
| FBgn0010217 | 840.18  | 48 | 2 | LVLEVAQHLGENTVR          | 22d | 28 |
| FBgn0010217 | 521.38  | 47 | 1 | LVPLEQTIK                | 22d | 28 |
| FBgn0010217 | 1330.26 | 46 | 1 | SLQDIHAILGMDELSEEDKLTVAR | 22d | 28 |
| FBgn0010217 | 632.21  | 46 | 1 | TIAMDGTEGLVR             | 22d | 28 |
| FBgn0010217 | 720.78  | 85 | 2 | VALTGLTVAEYFR            | 22d | 28 |
| FBgn0010217 | 802.11  | 59 | 2 | VALVYQMNEPPGAR           | 22d | 28 |
| FBgn0010217 | 517.42  | 63 | 3 | VLDTGYPPIR               | 22d | 28 |
| FBgn0010217 | 545.13  | 40 | 1 | VVDLLAPYAK               | 22d | 28 |
| FBgn0010217 | 663.78  | 72 | 3 | AIAELGIYPAVDPLDSTSR      | 32d | 28 |
| FBgn0010217 | 991.06  | 84 | 3 | EGNDLYNEMIEGGVISLK       | 32d | 28 |
| FBgn0010217 | 982.38  | 71 | 3 | FLSQPFQVAEVFTGHAGK       | 32d | 28 |
| FBgn0010217 | 718.75  | 91 | 3 | FTQAGSEVSALLGR           | 32d | 28 |
| FBgn0010217 | 488.58  | 46 | 3 | IGLFGGAGVGK              | 32d | 28 |
| FBgn0010217 | 684.8   | 66 | 3 | IINVIGEPIDER             | 32d | 28 |
| FBgn0010217 | 935.79  | 70 | 2 | IMDPNIIGQEHYNVAR         | 32d | 28 |
| FBgn0010217 | 751.4   | 67 | 2 | IPSAVGYQPTLATDMGSMQER    | 32d | 28 |
| FBgn0010217 | 507.29  | 51 | 3 | IPVGAETLGR               | 32d | 28 |
| FBgn0010217 | 839.87  | 70 | 3 | LVLEVAQHLGENTVR          | 32d | 28 |
| FBgn0010217 | 521.09  | 47 | 1 | LVPLEQTIK                | 32d | 28 |
| FBgn0010217 | 1330.59 | 62 | 2 | SLQDIHAILGMDELSEEDKLTVAR | 32d | 28 |
| FBgn0010217 | 632.23  | 73 | 6 | TIAMDGTEGLVR             | 32d | 28 |
| FBgn0010217 | 730.14  | 64 | 3 | TVLIMELINNVAK            | 32d | 28 |
| FBgn0010217 | 720.58  | 78 | 2 | VALTGLTVAEYFR            | 32d | 28 |
| FBgn0010217 | 801.71  | 85 | 3 | VALVYQMNEPPGAR           | 32d | 28 |
| FBgn0010217 | 517.89  | 45 | 2 | VLDTGYPPIR               | 32d | 28 |
| FBgn0010217 | 545.42  | 44 | 3 | VVDLLAPYAK               | 32d | 28 |
| FBgn0010217 | 991.63  | 63 | 4 | EGNDLYNEMIEGGVISLK       | 36d | 28 |

|             |         |    |   |                            |     |    |
|-------------|---------|----|---|----------------------------|-----|----|
| FBgn0010217 | 982.65  | 70 | 3 | FLSQPFQVAEVFTGHAGK         | 36d | 28 |
| FBgn0010217 | 718.89  | 88 | 3 | FTQAGSEVSALLGR             | 36d | 28 |
| FBgn0010217 | 488.76  | 43 | 3 | IGLFGGAGVGK                | 36d | 28 |
| FBgn0010217 | 684.84  | 58 | 5 | IINVIGEPIDER               | 36d | 28 |
| FBgn0010217 | 935.82  | 75 | 2 | IMDPNIIGQEHYNVAR           | 36d | 28 |
| FBgn0010217 | 1126.93 | 58 | 3 | IPSAVGYQPTLATDMGSMQER      | 36d | 28 |
| FBgn0010217 | 507.11  | 47 | 3 | IPVGAETLGR                 | 36d | 28 |
| FBgn0010217 | 839.91  | 69 | 3 | LVLEVAQHLGENTVR            | 36d | 28 |
| FBgn0010217 | 521.33  | 35 | 3 | LVPLEQTIK                  | 36d | 28 |
| FBgn0010217 | 938.27  | 48 | 2 | TAAIHAEAPEFVQMSVEQEILVTGIK | 36d | 28 |
| FBgn0010217 | 632.26  | 67 | 5 | TIAMDGTEGLVR               | 36d | 28 |
| FBgn0010217 | 729.97  | 73 | 6 | TVLIMELINNVAK              | 36d | 28 |
| FBgn0010217 | 720.56  | 88 | 4 | VALTGLTVAEYFR              | 36d | 28 |
| FBgn0010217 | 801.86  | 72 | 3 | VALVYQMNEPPGAR             | 36d | 28 |
| FBgn0010217 | 517.71  | 62 | 2 | VLDTGYPPIR                 | 36d | 28 |
| FBgn0010217 | 545.15  | 40 | 3 | VVDLLAPYAK                 | 36d | 28 |
| FBgn0010217 | 663.84  | 76 | 3 | AIAELGIYPAVDPLDSTSR        | 42d | 28 |
| FBgn0010217 | 991.29  | 80 | 3 | EGNDLYNEMIEGGVISLK         | 42d | 28 |
| FBgn0010217 | 982.68  | 86 | 2 | FLSQPFQVAEVFTGHAGK         | 42d | 28 |
| FBgn0010217 | 684.76  | 66 | 3 | IINVIGEPIDER               | 42d | 28 |
| FBgn0010217 | 935.82  | 71 | 3 | IMDPNIIGQEHYNVAR           | 42d | 28 |
| FBgn0010217 | 1127.03 | 73 | 2 | IPSAVGYQPTLATDMGSMQER      | 42d | 28 |
| FBgn0010217 | 507.26  | 36 | 1 | IPVGAETLGR                 | 42d | 28 |
| FBgn0010217 | 840.04  | 66 | 2 | LVLEVAQHLGENTVR            | 42d | 28 |
| FBgn0010217 | 707.42  | 53 | 2 | SLQDIIAILGMDELSEEDK        | 42d | 28 |
| FBgn0010217 | 1406.7  | 47 | 3 | TAAIHAEAPEFVQMSVEQEILVTGIK | 42d | 28 |
| FBgn0010217 | 632.28  | 67 | 3 | TIAMDGTEGLVR               | 42d | 28 |
| FBgn0010217 | 729.97  | 78 | 7 | TVLIMELINNVAK              | 42d | 28 |
| FBgn0010217 | 720.77  | 98 | 6 | VALTGLTVAEYFR              | 42d | 28 |
| FBgn0010217 | 802.05  | 84 | 3 | VALVYQMNEPPGAR             | 42d | 28 |
| FBgn0010217 | 518.02  | 63 | 3 | VLDTGYPPIR                 | 42d | 28 |
| FBgn0010217 | 545.01  | 44 | 4 | VVDLLAPYAK                 | 42d | 28 |

|             |         |     |   |                            |     |    |
|-------------|---------|-----|---|----------------------------|-----|----|
| FBgn0010217 | 663.78  | 47  | 1 | AIAELGIYPAVDPLDSTSR        | 46d | 28 |
| FBgn0010217 | 991.52  | 98  | 3 | EGNDLYNEMIEGGVISLK         | 46d | 28 |
| FBgn0010217 | 982.54  | 81  | 3 | FLSQPFQVAEVFTGHAGK         | 46d | 28 |
| FBgn0010217 | 488.63  | 46  | 2 | IGLFGGAGVGK                | 46d | 28 |
| FBgn0010217 | 684.83  | 72  | 3 | IINVIGEPIDER               | 46d | 28 |
| FBgn0010217 | 390.76  | 41  | 1 | ILQDYK                     | 46d | 28 |
| FBgn0010217 | 936.14  | 63  | 3 | IMDPNIIGQEHYNVAR           | 46d | 28 |
| FBgn0010217 | 1126.99 | 78  | 3 | IPSAVGYQPTLATDMGSMQER      | 46d | 28 |
| FBgn0010217 | 507.52  | 45  | 2 | IPVGAETLGR                 | 46d | 28 |
| FBgn0010217 | 839.85  | 76  | 2 | LVLEVAQHLGENTVR            | 46d | 28 |
| FBgn0010217 | 521.26  | 35  | 2 | LVPLEQTIK                  | 46d | 28 |
| FBgn0010217 | 1330.49 | 65  | 3 | SLQDIIAILGMDELSEEDKLTVAR   | 46d | 28 |
| FBgn0010217 | 938.22  | 65  | 4 | TAAIHAEAPEFVQMSVEQEILVTGIK | 46d | 28 |
| FBgn0010217 | 632.24  | 57  | 4 | TIAMDGTEGLVR               | 46d | 28 |
| FBgn0010217 | 729.82  | 83  | 5 | TVLIMELINNVAK              | 46d | 28 |
| FBgn0010217 | 721.06  | 102 | 3 | VALTGLTVAEYFR              | 46d | 28 |
| FBgn0010217 | 801.75  | 79  | 3 | VALVYQMNEPPGAR             | 46d | 28 |
| FBgn0010217 | 517.56  | 63  | 3 | VLDTGYPIDR                 | 46d | 28 |
| FBgn0010217 | 545.17  | 41  | 3 | VVDLLAPYAK                 | 46d | 28 |
| FBgn0010217 | 995.04  | 72  | 2 | AIAELGIYPAVDPLDSTSR        | 50d | 28 |
| FBgn0010217 | 991.48  | 83  | 3 | EGNDLYNEMIEGGVISLK         | 50d | 28 |
| FBgn0010217 | 982.34  | 81  | 3 | FLSQPFQVAEVFTGHAGK         | 50d | 28 |
| FBgn0010217 | 718.66  | 90  | 4 | FTQAGSEVSALLGR             | 50d | 28 |
| FBgn0010217 | 488.79  | 45  | 3 | IGLFGGAGVGK                | 50d | 28 |
| FBgn0010217 | 684.99  | 66  | 4 | IINVIGEPIDER               | 50d | 28 |
| FBgn0010217 | 935.87  | 76  | 2 | IMDPNIIGQEHYNVAR           | 50d | 28 |
| FBgn0010217 | 1126.99 | 74  | 3 | IPSAVGYQPTLATDMGSMQER      | 50d | 28 |
| FBgn0010217 | 507.28  | 65  | 3 | IPVGAETLGR                 | 50d | 28 |
| FBgn0010217 | 839.95  | 80  | 3 | LVLEVAQHLGENTVR            | 50d | 28 |
| FBgn0010217 | 521.17  | 40  | 1 | LVPLEQTIK                  | 50d | 28 |
| FBgn0010217 | 1406.85 | 56  | 2 | TAAIHAEAPEFVQMSVEQEILVTGIK | 50d | 28 |
| FBgn0010217 | 632.33  | 60  | 2 | TIAMDGTEGLVR               | 50d | 28 |

|             |         |     |   |                            |     |    |
|-------------|---------|-----|---|----------------------------|-----|----|
| FBgn0010217 | 729.99  | 80  | 6 | TVLIMELINNVAK              | 50d | 28 |
| FBgn0010217 | 720.9   | 105 | 6 | VALTGLTVAEYFR              | 50d | 28 |
| FBgn0010217 | 801.78  | 86  | 3 | VALVYQMNEPPGAR             | 50d | 28 |
| FBgn0010217 | 517.88  | 63  | 1 | VLDTGYPPIR                 | 50d | 28 |
| FBgn0010217 | 545.47  | 40  | 1 | VVDLLAPYAK                 | 50d | 28 |
| FBgn0010217 | 663.69  | 50  | 1 | AIAELGIYPAVDPLDSTSR        | 52d | 28 |
| FBgn0010217 | 991.32  | 80  | 3 | EGNDLYNEMIEGGVISLK         | 52d | 28 |
| FBgn0010217 | 684.95  | 54  | 2 | IINVIGEPIDER               | 52d | 28 |
| FBgn0010217 | 751.81  | 67  | 3 | IPSAVGYQPTLATDMGSMQER      | 52d | 28 |
| FBgn0010217 | 507.45  | 53  | 2 | IPVGAETLGR                 | 52d | 28 |
| FBgn0010217 | 839.77  | 83  | 3 | LVLEVAQHLGENTVR            | 52d | 28 |
| FBgn0010217 | 521.36  | 47  | 2 | LVPLEQTIK                  | 52d | 28 |
| FBgn0010217 | 1406.61 | 48  | 4 | TAAIHAEAPEFVQMSVEQEILVTGIK | 52d | 28 |
| FBgn0010217 | 632.46  | 67  | 5 | TIAMDGTEGLVR               | 52d | 28 |
| FBgn0010217 | 729.37  | 71  | 5 | TVLIMELINNVAK              | 52d | 28 |
| FBgn0010217 | 801.78  | 73  | 3 | VALVYQMNEPPGAR             | 52d | 28 |
| FBgn0010217 | 517.89  | 45  | 2 | VLDTGYPPIR                 | 52d | 28 |
| FBgn0010217 | 995.21  | 64  | 4 | AIAELGIYPAVDPLDSTSR        | 56d | 28 |
| FBgn0010217 | 962.18  | 74  | 4 | DQEGQDVLLFIDNIFR           | 56d | 28 |
| FBgn0010217 | 991.61  | 79  | 5 | EGNDLYNEMIEGGVISLK         | 56d | 28 |
| FBgn0010217 | 982.36  | 76  | 3 | FLSQPFQVAEVFTGHAGK         | 56d | 28 |
| FBgn0010217 | 488.91  | 40  | 1 | IGLFGGAGVGK                | 56d | 28 |
| FBgn0010217 | 684.88  | 66  | 4 | IINVIGEPIDER               | 56d | 28 |
| FBgn0010217 | 1127.24 | 74  | 3 | IPSAVGYQPTLATDMGSMQER      | 56d | 28 |
| FBgn0010217 | 507.3   | 42  | 3 | IPVGAETLGR                 | 56d | 28 |
| FBgn0010217 | 839.86  | 65  | 2 | LVLEVAQHLGENTVR            | 56d | 28 |
| FBgn0010217 | 1406.65 | 44  | 1 | TAAIHAEAPEFVQMSVEQEILVTGIK | 56d | 28 |
| FBgn0010217 | 632.53  | 55  | 1 | TIAMDGTEGLVR               | 56d | 28 |
| FBgn0010217 | 729.97  | 77  | 8 | TVLIMELINNVAK              | 56d | 28 |
| FBgn0010217 | 720.85  | 109 | 3 | VALTGLTVAEYFR              | 56d | 28 |
| FBgn0010217 | 801.85  | 63  | 2 | VALVYQMNEPPGAR             | 56d | 28 |
| FBgn0010218 | 1285.79 | 57  | 2 | AVEEVPTSEIPEQSSPSDSVPVAK   | 2d  | 18 |



|             |         |    |   |                                         |      |    |
|-------------|---------|----|---|-----------------------------------------|------|----|
| FBgn0010218 | 1130.18 | 75 | 3 | DLQTTDVSLLAIAATLDAIGEK                  | 2d   | 18 |
| FBgn0010218 | 1318.1  | 40 | 2 | YAEPVISEAPAAEVPITAGDNPDNSTVGISEVVPTIAEK | 2d   | 18 |
| FBgn0010218 | 1285.71 | 48 | 3 | AVEEVPTSEIPEQSSSPSDSVPVAK               | 22d  | 18 |
| FBgn0010218 | 1285.76 | 47 | 2 | AVEEVPTSEIPEQSSSPSDSVPVAK               | 42d  | 18 |
| FBgn0010218 | 753.8   | 80 | 3 | DLQTTDVSLLAIAATLDAIGEK                  | 42d  | 18 |
| FBgn0010218 | 1285.79 | 65 | 3 | AVEEVPTSEIPEQSSSPSDSVPVAK               | 62d  | 18 |
| FBgn0010218 | 1130.28 | 59 | 1 | DLQTTDVSLLAIAATLDAIGEK                  | 62d  | 18 |
| FBgn0010218 | 1285.86 | 49 | 3 | AVEEVPTSEIPEQSSSPSDSVPVAK               | 82d  | 18 |
| FBgn0010218 | 1129.86 | 64 | 1 | DLQTTDVSLLAIAATLDAIGEK                  | 82d  | 18 |
| FBgn0010218 | 1285.76 | 67 | 3 | AVEEVPTSEIPEQSSSPSDSVPVAK               | 102d | 18 |
| FBgn0010218 | 1285.7  | 61 | 2 | AVEEVPTSEIPEQSSSPSDSVPVAK               | 112d | 18 |
| FBgn0010218 | 1285.64 | 54 | 1 | AVEEVPTSEIPEQSSSPSDSVPVAK               | 122d | 18 |
| FBgn0010218 | 1285.77 | 59 | 2 | AVEEVPTSEIPEQSSSPSDSVPVAK               | 132d | 18 |
| FBgn0010218 | 1285.74 | 77 | 1 | AVEEVPTSEIPEQSSSPSDSVPVAK               | 142d | 18 |
| FBgn0010218 | 1285.51 | 53 | 3 | AVEEVPTSEIPEQSSSPSDSVPVAK               | 2d   | 28 |
| FBgn0010218 | 1130.11 | 90 | 3 | DLQTTDVSLLAIAATLDAIGEK                  | 2d   | 28 |
| FBgn0010218 | 1285.41 | 53 | 6 | AVEEVPTSEIPEQSSSPSDSVPVAK               | 12d  | 28 |
| FBgn0010218 | 1130.05 | 51 | 1 | DLQTTDVSLLAIAATLDAIGEK                  | 12d  | 28 |
| FBgn0010218 | 1285.65 | 73 | 3 | AVEEVPTSEIPEQSSSPSDSVPVAK               | 22d  | 28 |
| FBgn0010218 | 1285.53 | 50 | 1 | AVEEVPTSEIPEQSSSPSDSVPVAK               | 32d  | 28 |
| FBgn0010218 | 1285.47 | 67 | 3 | AVEEVPTSEIPEQSSSPSDSVPVAK               | 36d  | 28 |
| FBgn0010218 | 1285.54 | 60 | 2 | AVEEVPTSEIPEQSSSPSDSVPVAK               | 42d  | 28 |
| FBgn0010218 | 1285.83 | 57 | 1 | AVEEVPTSEIPEQSSSPSDSVPVAK               | 46d  | 28 |
| FBgn0010218 | 1285.74 | 82 | 2 | AVEEVPTSEIPEQSSSPSDSVPVAK               | 50d  | 28 |
| FBgn0010218 | 1285.52 | 43 | 1 | AVEEVPTSEIPEQSSSPSDSVPVAK               | 52d  | 28 |
| FBgn0010218 | 1285.78 | 60 | 2 | AVEEVPTSEIPEQSSSPSDSVPVAK               | 56d  | 28 |
| FBgn0010218 | 1129.99 | 81 | 1 | DLQTTDVSLLAIAATLDAIGEK                  | 56d  | 28 |
| FBgn0010226 | 875.47  | 61 | 3 | IAVVSYEPEDEIKEK                         | 2d   | 18 |
| FBgn0010226 | 663.58  | 46 | 1 | GVVDAVNALEPIK                           | 82d  | 18 |
| FBgn0010226 | 746.92  | 61 | 1 | IAVVSYEPEDEIK                           | 82d  | 18 |
| FBgn0010226 | 663.42  | 77 | 1 | GVVDAVNALEPIK                           | 102d | 18 |
| FBgn0010226 | 746.86  | 52 | 1 | IAVVSYEPEDEIK                           | 46d  | 28 |

|             |         |    |   |                              |      |    |
|-------------|---------|----|---|------------------------------|------|----|
| FBgn0010228 | 698.81  | 80 | 2 | EYEANGGTDSGAPK               | 42d  | 18 |
| FBgn0010228 | 532.93  | 40 | 1 | DKTEWEQK                     | 82d  | 18 |
| FBgn0010288 | 1031.87 | 35 | 1 | LGVSPAWSVTDVIGLEDDTLEWIPRPVK | 46d  | 28 |
| FBgn0010352 | 811.43  | 65 | 1 | IIPDNGPAGQNPSNVK             | 2d   | 18 |
| FBgn0010352 | 1261.54 | 72 | 3 | KPLNQIFTQFAGLEAADDGSGDVK     | 2d   | 18 |
| FBgn0010352 | 1022.73 | 99 | 3 | LAVVANPSHLEAVDPVVQGK         | 2d   | 18 |
| FBgn0010352 | 728.1   | 55 | 3 | NAELVWAQEEHK                 | 2d   | 18 |
| FBgn0010352 | 1261.49 | 72 | 3 | KPLNQIFTQFAGLEAADDGSGDVK     | 22d  | 18 |
| FBgn0010352 | 1022.57 | 70 | 2 | LAVVANPSHLEAVDPVVQGK         | 22d  | 18 |
| FBgn0010352 | 727.76  | 61 | 3 | NAELVWAQEEHK                 | 22d  | 18 |
| FBgn0010352 | 760.4   | 53 | 3 | VEQISPPFDLVK                 | 22d  | 18 |
| FBgn0010352 | 1261.39 | 60 | 3 | KPLNQIFTQFAGLEAADDGSGDVK     | 42d  | 18 |
| FBgn0010352 | 727.75  | 52 | 3 | NAELVWAQEEHK                 | 42d  | 18 |
| FBgn0010352 | 810.08  | 85 | 1 | SPFSEMSEGFQR                 | 42d  | 18 |
| FBgn0010352 | 760.45  | 57 | 3 | VEQISPPFDLVK                 | 42d  | 18 |
| FBgn0010352 | 591.69  | 39 | 1 | EETLIHIGNR                   | 62d  | 18 |
| FBgn0010352 | 811.21  | 40 | 2 | IIPDNGPAGQNPSNVK             | 62d  | 18 |
| FBgn0010352 | 1261.54 | 77 | 2 | KPLNQIFTQFAGLEAADDGSGDVK     | 62d  | 18 |
| FBgn0010352 | 1022.75 | 64 | 1 | LAVVANPSHLEAVDPVVQGK         | 62d  | 18 |
| FBgn0010352 | 727.97  | 62 | 1 | NAELVWAQEEHK                 | 62d  | 18 |
| FBgn0010352 | 760.39  | 34 | 1 | VEQISPPFDLVK                 | 62d  | 18 |
| FBgn0010352 | 591.56  | 52 | 1 | EETLIHIGNR                   | 82d  | 18 |
| FBgn0010352 | 1022.71 | 79 | 3 | LAVVANPSHLEAVDPVVQGK         | 82d  | 18 |
| FBgn0010352 | 727.9   | 62 | 1 | NAELVWAQEEHK                 | 82d  | 18 |
| FBgn0010352 | 806.21  | 39 | 1 | YKDWLDSPWSGFFEGKDKPLK        | 82d  | 18 |
| FBgn0010352 | 1261.69 | 69 | 2 | KPLNQIFTQFAGLEAADDGSGDVK     | 102d | 18 |
| FBgn0010352 | 1022.62 | 67 | 4 | LAVVANPSHLEAVDPVVQGK         | 102d | 18 |
| FBgn0010352 | 727.75  | 51 | 2 | NAELVWAQEEHK                 | 102d | 18 |
| FBgn0010352 | 982.12  | 55 | 1 | YKDWLDSPWSGFFEGK             | 102d | 18 |
| FBgn0010352 | 1261.51 | 72 | 2 | KPLNQIFTQFAGLEAADDGSGDVK     | 112d | 18 |
| FBgn0010352 | 1022.59 | 73 | 2 | LAVVANPSHLEAVDPVVQGK         | 112d | 18 |
| FBgn0010352 | 727.91  | 50 | 1 | NAELVWAQEEHK                 | 112d | 18 |

|             |         |    |   |                          |      |    |
|-------------|---------|----|---|--------------------------|------|----|
| FBgn0010352 | 810.08  | 68 | 2 | SPFSEMSEGSEFQR           | 112d | 18 |
| FBgn0010352 | 1261.62 | 72 | 3 | KPLNQIFTQFAGLEAADDGSGDVK | 122d | 18 |
| FBgn0010352 | 1022.5  | 55 | 2 | LAVVANPSHLEAVDPVVQGK     | 122d | 18 |
| FBgn0010352 | 727.92  | 52 | 2 | NAELVWAQEEHK             | 122d | 18 |
| FBgn0010352 | 809.87  | 81 | 2 | SPFSEMSEGSEFQR           | 122d | 18 |
| FBgn0010352 | 760.08  | 58 | 1 | VEQISPPFDLVK             | 122d | 18 |
| FBgn0010352 | 1261.6  | 68 | 1 | KPLNQIFTQFAGLEAADDGSGDVK | 132d | 18 |
| FBgn0010352 | 1022.78 | 50 | 1 | LAVVANPSHLEAVDPVVQGK     | 132d | 18 |
| FBgn0010352 | 727.92  | 50 | 1 | NAELVWAQEEHK             | 132d | 18 |
| FBgn0010352 | 809.9   | 81 | 2 | SPFSEMSEGSEFQR           | 132d | 18 |
| FBgn0010352 | 1261.79 | 63 | 2 | KPLNQIFTQFAGLEAADDGSGDVK | 142d | 18 |
| FBgn0010352 | 1022.8  | 60 | 3 | LAVVANPSHLEAVDPVVQGK     | 142d | 18 |
| FBgn0010352 | 728.02  | 56 | 3 | NAELVWAQEEHK             | 142d | 18 |
| FBgn0010352 | 810.09  | 75 | 1 | SPFSEMSEGSEFQR           | 142d | 18 |
| FBgn0010352 | 760.27  | 64 | 3 | VEQISPPFDLVK             | 142d | 18 |
| FBgn0010352 | 811.17  | 63 | 3 | IIPDNGPAGQNPSNVK         | 2d   | 28 |
| FBgn0010352 | 1261.85 | 51 | 1 | KPLNQIFTQFAGLEAADDGSGDVK | 2d   | 28 |
| FBgn0010352 | 1022.76 | 65 | 3 | LAVVANPSHLEAVDPVVQGK     | 2d   | 28 |
| FBgn0010352 | 681.06  | 41 | 1 | LIAEGTVTAEVVK            | 2d   | 28 |
| FBgn0010352 | 728.04  | 62 | 2 | NAELVWAQEEHK             | 2d   | 28 |
| FBgn0010352 | 760.22  | 67 | 3 | VEQISPPFDLVK             | 2d   | 28 |
| FBgn0010352 | 1063.15 | 35 | 1 | DWLDPWSGFFEGKDPLK        | 12d  | 28 |
| FBgn0010352 | 811.17  | 37 | 1 | IIPDNGPAGQNPSNVK         | 12d  | 28 |
| FBgn0010352 | 1261.5  | 72 | 3 | KPLNQIFTQFAGLEAADDGSGDVK | 12d  | 28 |
| FBgn0010352 | 1022.4  | 90 | 2 | LAVVANPSHLEAVDPVVQGK     | 12d  | 28 |
| FBgn0010352 | 728.09  | 50 | 3 | NAELVWAQEEHK             | 12d  | 28 |
| FBgn0010352 | 809.74  | 99 | 3 | SPFSEMSEGSEFQR           | 12d  | 28 |
| FBgn0010352 | 890.61  | 34 | 1 | VADWALGEAMAFGSLLK        | 12d  | 28 |
| FBgn0010352 | 760.33  | 38 | 1 | VEQISPPFDLVK             | 12d  | 28 |
| FBgn0010352 | 1022.6  | 73 | 2 | LAVVANPSHLEAVDPVVQGK     | 22d  | 28 |
| FBgn0010352 | 727.98  | 57 | 3 | NAELVWAQEEHK             | 22d  | 28 |
| FBgn0010352 | 760.53  | 57 | 2 | VEQISPPFDLVK             | 22d  | 28 |

|             |         |     |   |                          |     |    |
|-------------|---------|-----|---|--------------------------|-----|----|
| FBgn0010352 | 806.2   | 49  | 1 | YKDWLDSPWSGFFEGKDPLK     | 22d | 28 |
| FBgn0010352 | 1022.38 | 86  | 1 | LAVVANPSHLEAVDPVVQ GK    | 32d | 28 |
| FBgn0010352 | 727.71  | 59  | 3 | NAELVWAQEEHK             | 32d | 28 |
| FBgn0010352 | 809.69  | 95  | 2 | SPFSEMSEGSEFQR           | 32d | 28 |
| FBgn0010352 | 760.5   | 59  | 3 | VEQISPPFDLVK             | 32d | 28 |
| FBgn0010352 | 806.22  | 42  | 1 | YKDWLDSPWSGFFEGKDPLK     | 32d | 28 |
| FBgn0010352 | 811.14  | 42  | 1 | IIPDNGPAGQNPSNVK         | 36d | 28 |
| FBgn0010352 | 1261.52 | 79  | 2 | KPLNQIFTQFAGLEAADDGSGDVK | 36d | 28 |
| FBgn0010352 | 1022.46 | 84  | 2 | LAVVANPSHLEAVDPVVQ GK    | 36d | 28 |
| FBgn0010352 | 727.97  | 63  | 3 | NAELVWAQEEHK             | 36d | 28 |
| FBgn0010352 | 809.69  | 91  | 3 | SPFSEMSEGSEFQR           | 36d | 28 |
| FBgn0010352 | 890.41  | 49  | 1 | VADWALGEAMAFGSLK         | 36d | 28 |
| FBgn0010352 | 760.29  | 65  | 3 | VEQISPPFDLVK             | 36d | 28 |
| FBgn0010352 | 806     | 48  | 1 | YKDWLDSPWSGFFEGKDPLK     | 36d | 28 |
| FBgn0010352 | 1063.24 | 69  | 3 | DWLDSPWSGFFEGKDPLK       | 42d | 28 |
| FBgn0010352 | 1261.4  | 69  | 1 | KPLNQIFTQFAGLEAADDGSGDVK | 42d | 28 |
| FBgn0010352 | 1022.43 | 66  | 1 | LAVVANPSHLEAVDPVVQ GK    | 42d | 28 |
| FBgn0010352 | 727.69  | 63  | 3 | NAELVWAQEEHK             | 42d | 28 |
| FBgn0010352 | 809.68  | 84  | 3 | SPFSEMSEGSEFQR           | 42d | 28 |
| FBgn0010352 | 890.5   | 90  | 1 | VADWALGEAMAFGSLK         | 42d | 28 |
| FBgn0010352 | 760.49  | 41  | 1 | VEQISPPFDLVK             | 42d | 28 |
| FBgn0010352 | 1261.53 | 73  | 2 | KPLNQIFTQFAGLEAADDGSGDVK | 46d | 28 |
| FBgn0010352 | 1022.45 | 91  | 2 | LAVVANPSHLEAVDPVVQ GK    | 46d | 28 |
| FBgn0010352 | 728.09  | 52  | 2 | NAELVWAQEEHK             | 46d | 28 |
| FBgn0010352 | 809.88  | 81  | 2 | SPFSEMSEGSEFQR           | 46d | 28 |
| FBgn0010352 | 760.48  | 57  | 1 | VEQISPPFDLVK             | 46d | 28 |
| FBgn0010352 | 1261.54 | 73  | 2 | KPLNQIFTQFAGLEAADDGSGDVK | 50d | 28 |
| FBgn0010352 | 1022.49 | 100 | 1 | LAVVANPSHLEAVDPVVQ GK    | 50d | 28 |
| FBgn0010352 | 728.09  | 53  | 2 | NAELVWAQEEHK             | 50d | 28 |
| FBgn0010352 | 809.77  | 95  | 3 | SPFSEMSEGSEFQR           | 50d | 28 |
| FBgn0010352 | 890.35  | 56  | 1 | VADWALGEAMAFGSLK         | 50d | 28 |
| FBgn0010352 | 811.6   | 44  | 1 | IIPDNGPAGQNPSNVK         | 52d | 28 |

|             |         |    |   |                           |      |    |
|-------------|---------|----|---|---------------------------|------|----|
| FBgn0010352 | 1261.74 | 77 | 2 | KPLNQIFTQFAGLEAADDGSGDVK  | 52d  | 28 |
| FBgn0010352 | 1022.67 | 81 | 3 | LAVVANPSHLEAVDPVVQGK      | 52d  | 28 |
| FBgn0010352 | 727.69  | 58 | 3 | NAELVWAQEEHK              | 52d  | 28 |
| FBgn0010352 | 809.87  | 78 | 1 | SPFSEMSEGFQR              | 52d  | 28 |
| FBgn0010352 | 760.51  | 38 | 1 | VEQISPPFDLVK              | 52d  | 28 |
| FBgn0010352 | 1063.08 | 39 | 1 | DWLDSPWSGFFEGKDPLK        | 56d  | 28 |
| FBgn0010352 | 811.61  | 45 | 1 | IIPDNGPAGQNPSNVK          | 56d  | 28 |
| FBgn0010352 | 1261.4  | 62 | 2 | KPLNQIFTQFAGLEAADDGSGDVK  | 56d  | 28 |
| FBgn0010352 | 727.85  | 54 | 1 | NAELVWAQEEHK              | 56d  | 28 |
| FBgn0010352 | 760.64  | 35 | 1 | VEQISPPFDLVK              | 56d  | 28 |
| FBgn0010380 | 815.11  | 43 | 1 | LANQSNIAQVLSELK           | 2d   | 18 |
| FBgn0010380 | 815.12  | 62 | 2 | LANQSNIAQVLSELK           | 42d  | 18 |
| FBgn0010380 | 814.83  | 61 | 1 | LANQSNIAQVLSELK           | 62d  | 18 |
| FBgn0010380 | 1275.17 | 45 | 1 | EIPAANELQYTLSGVIGTTDGIASK | 122d | 18 |
| FBgn0010380 | 814.94  | 52 | 1 | LANQSNIAQVLSELK           | 142d | 18 |
| FBgn0010380 | 815.03  | 60 | 3 | LANQSNIAQVLSELK           | 2d   | 28 |
| FBgn0010380 | 1205.1  | 70 | 1 | DVSALFPDVVNCMQTDNLELK     | 52d  | 28 |
| FBgn0010380 | 815.15  | 80 | 1 | LANQSNIAQVLSELK           | 56d  | 28 |
| FBgn0010387 | 1035.95 | 40 | 1 | SSEAAQQEYITFVEGLVAK       | 2d   | 18 |
| FBgn0010387 | 597.9   | 59 | 1 | VSEQFNAAA EK              | 2d   | 18 |
| FBgn0010387 | 1036.18 | 54 | 1 | SSEAAQQEYITFVEGLVAK       | 22d  | 18 |
| FBgn0010387 | 1035.91 | 80 | 2 | SSEAAQQEYITFVEGLVAK       | 42d  | 18 |
| FBgn0010387 | 597.72  | 60 | 1 | VSEQFNAAA EK              | 42d  | 18 |
| FBgn0010387 | 597.8   | 57 | 1 | VSEQFNAAA EK              | 82d  | 18 |
| FBgn0010387 | 1035.89 | 37 | 1 | SSEAAQQEYITFVEGLVAK       | 102d | 18 |
| FBgn0010387 | 1035.88 | 49 | 1 | SSEAAQQEYITFVEGLVAK       | 112d | 18 |
| FBgn0010387 | 1035.89 | 59 | 2 | SSEAAQQEYITFVEGLVAK       | 2d   | 28 |
| FBgn0010387 | 597.8   | 55 | 1 | VSEQFNAAA EK              | 2d   | 28 |
| FBgn0010387 | 1035.92 | 84 | 2 | SSEAAQQEYITFVEGLVAK       | 32d  | 28 |
| FBgn0010387 | 1035.63 | 77 | 2 | SSEAAQQEYITFVEGLVAK       | 36d  | 28 |
| FBgn0010387 | 1036.09 | 68 | 1 | SSEAAQQEYITFVEGLVAK       | 52d  | 28 |
| FBgn0010387 | 1036.03 | 80 | 1 | SSEAAQQEYITFVEGLVAK       | 56d  | 28 |

|             |         |     |   |                                  |      |    |
|-------------|---------|-----|---|----------------------------------|------|----|
| FBgn0010397 | 1124.31 | 45  | 1 | INREEIELLYDNEIQNLK               | 102d | 18 |
| FBgn0010397 | 1124.22 | 54  | 1 | INREEIELLYDNEIQNLK               | 56d  | 28 |
| FBgn0010411 | 523.79  | 41  | 1 | VPNWFLNR                         | 2d   | 18 |
| FBgn0010411 | 688.28  | 46  | 2 | VVTIISNPLQYK                     | 2d   | 18 |
| FBgn0010411 | 722.08  | 69  | 3 | YWQLTSSNLDSK                     | 2d   | 18 |
| FBgn0010411 | 721.85  | 57  | 1 | YWQLTSSNLDSK                     | 42d  | 18 |
| FBgn0010411 | 721.81  | 61  | 2 | YWQLTSSNLDSK                     | 2d   | 28 |
| FBgn0010411 | 721.72  | 52  | 1 | YWQLTSSNLDSK                     | 22d  | 28 |
| FBgn0010411 | 722.08  | 54  | 1 | YWQLTSSNLDSK                     | 46d  | 28 |
| FBgn0010412 | 836.34  | 47  | 1 | ELAPYDPDWFYVR                    | 56d  | 28 |
| FBgn0010413 | 668.09  | 65  | 1 | DKLNNQVLFDK                      | 2d   | 18 |
| FBgn0010413 | 667.74  | 59  | 2 | DKLNNQVLFDK                      | 2d   | 28 |
| FBgn0010434 | 951.35  | 53  | 1 | IRPGEFEQYESTIGFK                 | 2d   | 18 |
| FBgn0010434 | 1702.82 | 43  | 1 | IYTATGEVDQATGEPLYAATQVDPESGEVYTK | 2d   | 18 |
| FBgn0010434 | 1324.98 | 97  | 3 | SEYGDIDPNTGDIDPATAVTDVPVTGK      | 2d   | 18 |
| FBgn0010434 | 945.26  | 90  | 3 | SPLFTTSATTGPHVESTR               | 2d   | 18 |
| FBgn0010434 | 1273.59 | 53  | 1 | VVLGEDTPGFSGHGEIISTQTVSSK        | 2d   | 18 |
| FBgn0010434 | 951.69  | 61  | 1 | IRPGEFEQYESTIGFK                 | 22d  | 18 |
| FBgn0010434 | 1055.8  | 54  | 2 | LIEVGQQIDPIVEVTSLAGK             | 22d  | 18 |
| FBgn0010434 | 1325.22 | 67  | 1 | SEYGDIDPNTGDIDPATAVTDVPVTGK      | 22d  | 18 |
| FBgn0010434 | 1041.89 | 78  | 2 | ADATPTDLGAYVTATAVTR              | 42d  | 18 |
| FBgn0010434 | 1055.67 | 75  | 1 | LIEVGQQIDPIVEVTSLAGK             | 42d  | 18 |
| FBgn0010434 | 1325.02 | 105 | 3 | SEYGDIDPNTGDIDPATAVTDVPVTGK      | 42d  | 18 |
| FBgn0010434 | 855.72  | 58  | 2 | VDPGTGQITILGVVDPK                | 42d  | 18 |
| FBgn0010434 | 1702.42 | 34  | 1 | IYTATGEVDQATGEPLYAATQVDPESGEVYTK | 62d  | 18 |
| FBgn0010434 | 1055.84 | 77  | 1 | LIEVGQQIDPIVEVTSLAGK             | 62d  | 18 |
| FBgn0010434 | 1324.88 | 95  | 2 | SEYGDIDPNTGDIDPATAVTDVPVTGK      | 62d  | 18 |
| FBgn0010434 | 806.43  | 38  | 1 | NIDGVTHNVEEEVR                   | 82d  | 18 |
| FBgn0010434 | 1325.06 | 82  | 1 | SEYGDIDPNTGDIDPATAVTDVPVTGK      | 82d  | 18 |
| FBgn0010434 | 1702.51 | 41  | 1 | IYTATGEVDQATGEPLYAATQVDPESGEVYTK | 102d | 18 |
| FBgn0010434 | 1055.68 | 68  | 1 | LIEVGQQIDPIVEVTSLAGK             | 102d | 18 |
| FBgn0010434 | 1325.1  | 111 | 2 | SEYGDIDPNTGDIDPATAVTDVPVTGK      | 102d | 18 |

|             |         |     |   |                                  |      |    |
|-------------|---------|-----|---|----------------------------------|------|----|
| FBgn0010434 | 1055.69 | 47  | 1 | LIEVGQQIDPIVEVTSLAGK             | 112d | 18 |
| FBgn0010434 | 1702.7  | 36  | 1 | IYTATGEVDQATGEPLYAATQVDPESGEVYTK | 132d | 18 |
| FBgn0010434 | 658.67  | 43  | 1 | TWLDLEKPVSK                      | 132d | 18 |
| FBgn0010434 | 1042.09 | 114 | 2 | ADATPTDLSGAYVTATAVTR             | 142d | 18 |
| FBgn0010434 | 1702.82 | 40  | 1 | IYTATGEVDQATGEPLYAATQVDPESGEVYTK | 142d | 18 |
| FBgn0010434 | 1055.38 | 40  | 1 | LIEVGQQIDPIVEVTSLAGK             | 142d | 18 |
| FBgn0010434 | 1325.29 | 79  | 2 | SEYGDIDPNTGDIDPATAVTDVPVTGK      | 142d | 18 |
| FBgn0010434 | 806.4   | 55  | 1 | NIDGVTHNVEEEVR                   | 2d   | 28 |
| FBgn0010434 | 832.76  | 81  | 1 | NLGTGEVYSTQEHK                   | 2d   | 28 |
| FBgn0010434 | 1325.05 | 76  | 2 | SEYGDIDPNTGDIDPATAVTDVPVTGK      | 2d   | 28 |
| FBgn0010434 | 945.34  | 105 | 3 | SPLFTTSATTGPHVESTR               | 2d   | 28 |
| FBgn0010434 | 733.37  | 57  | 1 | TAQVETSGGQFDPK                   | 2d   | 28 |
| FBgn0010434 | 714.66  | 50  | 1 | TTATVTSGDQYQR                    | 2d   | 28 |
| FBgn0010434 | 1702.86 | 38  | 2 | IYTATGEVDQATGEPLYAATQVDPESGEVYTK | 12d  | 28 |
| FBgn0010434 | 879.54  | 61  | 1 | LQGSAVDAAA VPLSDSQK              | 12d  | 28 |
| FBgn0010434 | 1324.95 | 97  | 3 | SEYGDIDPNTGDIDPATAVTDVPVTGK      | 12d  | 28 |
| FBgn0010434 | 945.04  | 105 | 3 | SPLFTTSATTGPHVESTR               | 12d  | 28 |
| FBgn0010434 | 1325.25 | 109 | 1 | SEYGDIDPNTGDIDPATAVTDVPVTGK      | 22d  | 28 |
| FBgn0010434 | 1325.24 | 80  | 3 | SEYGDIDPNTGDIDPATAVTDVPVTGK      | 32d  | 28 |
| FBgn0010434 | 1055.52 | 58  | 2 | LIEVGQQIDPIVEVTSLAGK             | 36d  | 28 |
| FBgn0010434 | 1324.96 | 105 | 2 | SEYGDIDPNTGDIDPATAVTDVPVTGK      | 36d  | 28 |
| FBgn0010434 | 1055.5  | 72  | 2 | LIEVGQQIDPIVEVTSLAGK             | 42d  | 28 |
| FBgn0010434 | 1325.36 | 84  | 3 | SEYGDIDPNTGDIDPATAVTDVPVTGK      | 42d  | 28 |
| FBgn0010434 | 1325.03 | 94  | 2 | SEYGDIDPNTGDIDPATAVTDVPVTGK      | 46d  | 28 |
| FBgn0010434 | 1324.94 | 92  | 3 | SEYGDIDPNTGDIDPATAVTDVPVTGK      | 50d  | 28 |
| FBgn0010434 | 1702.66 | 34  | 1 | IYTATGEVDQATGEPLYAATQVDPESGEVYTK | 52d  | 28 |
| FBgn0010434 | 1324.96 | 82  | 3 | SEYGDIDPNTGDIDPATAVTDVPVTGK      | 52d  | 28 |
| FBgn0010434 | 1324.97 | 89  | 3 | SEYGDIDPNTGDIDPATAVTDVPVTGK      | 56d  | 28 |
| FBgn0010516 | 1080.14 | 94  | 2 | DPEAPIFQVADIGIVADLFK             | 2d   | 18 |
| FBgn0010516 | 1450.02 | 60  | 2 | TIVAINKDPEAPIFQVADIGIVADLFK      | 2d   | 18 |
| FBgn0010516 | 784.14  | 38  | 1 | IVAPELYI AVGISGAIQHLAGMK         | 22d  | 18 |
| FBgn0010516 | 714.85  | 79  | 1 | LDVSPISEIIDVK                    | 22d  | 18 |

|             |         |     |   |                                        |      |    |
|-------------|---------|-----|---|----------------------------------------|------|----|
| FBgn0010516 | 951.52  | 34  | 1 | AAVDAGFVPNDLQIGQTGK                    | 42d  | 18 |
| FBgn0010516 | 1080.1  | 108 | 4 | DPEAPIFQVADIGIVADLFK                   | 42d  | 18 |
| FBgn0010516 | 784.13  | 45  | 2 | IVAPELYIAVGISGAIQHLAGMK                | 42d  | 18 |
| FBgn0010516 | 714.9   | 62  | 1 | LDVSPISEIIDVK                          | 42d  | 18 |
| FBgn0010516 | 966.79  | 36  | 1 | TIVAINKDPEAPIFQVADIGIVADLFK            | 42d  | 18 |
| FBgn0010516 | 951.17  | 56  | 2 | AAVDAGFVPNDLQIGQTGK                    | 62d  | 18 |
| FBgn0010516 | 1079.75 | 101 | 4 | DPEAPIFQVADIGIVADLFK                   | 62d  | 18 |
| FBgn0010516 | 660.89  | 58  | 2 | FTHILAGASAFGK                          | 62d  | 18 |
| FBgn0010516 | 714.46  | 75  | 1 | LDVSPISEIIDVK                          | 62d  | 18 |
| FBgn0010516 | 951.41  | 56  | 1 | AAVDAGFVPNDLQIGQTGK                    | 82d  | 18 |
| FBgn0010516 | 1080.23 | 93  | 3 | DPEAPIFQVADIGIVADLFK                   | 82d  | 18 |
| FBgn0010516 | 1248.48 | 62  | 2 | STNFPPAATSGGSGAVEQAPAGDFASSLSEFVSQELTK | 82d  | 18 |
| FBgn0010516 | 951.54  | 48  | 1 | AAVDAGFVPNDLQIGQTGK                    | 102d | 18 |
| FBgn0010516 | 1080.27 | 45  | 2 | DPEAPIFQVADIGIVADLFK                   | 102d | 18 |
| FBgn0010516 | 1248.72 | 64  | 1 | STNFPPAATSGGSGAVEQAPAGDFASSLSEFVSQELTK | 102d | 18 |
| FBgn0010516 | 714.38  | 69  | 3 | LDVSPISEIIDVK                          | 112d | 18 |
| FBgn0010516 | 1248.34 | 48  | 1 | STNFPPAATSGGSGAVEQAPAGDFASSLSEFVSQELTK | 122d | 18 |
| FBgn0010516 | 1449.9  | 45  | 2 | TIVAINKDPEAPIFQVADIGIVADLFK            | 122d | 18 |
| FBgn0010516 | 714.97  | 66  | 2 | LDVSPISEIIDVK                          | 132d | 18 |
| FBgn0010516 | 1248.49 | 53  | 1 | STNFPPAATSGGSGAVEQAPAGDFASSLSEFVSQELTK | 132d | 18 |
| FBgn0010516 | 951.41  | 37  | 1 | AAVDAGFVPNDLQIGQTGK                    | 142d | 18 |
| FBgn0010516 | 715.12  | 71  | 1 | LDVSPISEIIDVK                          | 142d | 18 |
| FBgn0010516 | 951.47  | 68  | 1 | AAVDAGFVPNDLQIGQTGK                    | 2d   | 28 |
| FBgn0010516 | 1080.15 | 101 | 1 | DPEAPIFQVADIGIVADLFK                   | 2d   | 28 |
| FBgn0010516 | 783.99  | 47  | 2 | IVAPELYIAVGISGAIQHLAGMK                | 2d   | 28 |
| FBgn0010516 | 714.85  | 74  | 3 | LDVSPISEIIDVK                          | 2d   | 28 |
| FBgn0010516 | 951.48  | 42  | 1 | AAVDAGFVPNDLQIGQTGK                    | 12d  | 28 |
| FBgn0010516 | 1080.17 | 106 | 4 | DPEAPIFQVADIGIVADLFK                   | 12d  | 28 |
| FBgn0010516 | 784.09  | 46  | 1 | IVAPELYIAVGISGAIQHLAGMK                | 12d  | 28 |
| FBgn0010516 | 714.7   | 78  | 3 | LDVSPISEIIDVK                          | 12d  | 28 |
| FBgn0010516 | 1449.53 | 60  | 2 | TIVAINKDPEAPIFQVADIGIVADLFK            | 12d  | 28 |
| FBgn0010516 | 951.65  | 53  | 1 | AAVDAGFVPNDLQIGQTGK                    | 22d  | 28 |



|             |         |     |   |                         |     |    |
|-------------|---------|-----|---|-------------------------|-----|----|
| FBgn0010516 | 784.61  | 46  | 2 | IVAPELYIAVGISGAIQHLAGMK | 22d | 28 |
| FBgn0010516 | 951.57  | 52  | 1 | AAVDAGFVPNDLQIGQTGK     | 32d | 28 |
| FBgn0010516 | 661     | 70  | 2 | FTHILAGASAFGK           | 32d | 28 |
| FBgn0010516 | 783.96  | 49  | 2 | IVAPELYIAVGISGAIQHLAGMK | 32d | 28 |
| FBgn0010516 | 714.69  | 76  | 2 | LDVSPISEIIDVK           | 32d | 28 |
| FBgn0010516 | 951.56  | 44  | 2 | AAVDAGFVPNDLQIGQTGK     | 36d | 28 |
| FBgn0010516 | 660.85  | 62  | 3 | FTHILAGASAFGK           | 36d | 28 |
| FBgn0010516 | 714.75  | 79  | 2 | LDVSPISEIIDVK           | 36d | 28 |
| FBgn0010516 | 951.54  | 65  | 2 | AAVDAGFVPNDLQIGQTGK     | 42d | 28 |
| FBgn0010516 | 1080.08 | 83  | 8 | DPEAPIFQVADIGIVADLFK    | 42d | 28 |
| FBgn0010516 | 661.04  | 56  | 2 | FTHILAGASAFGK           | 42d | 28 |
| FBgn0010516 | 784.83  | 41  | 1 | IVAPELYIAVGISGAIQHLAGMK | 42d | 28 |
| FBgn0010516 | 714.44  | 80  | 2 | LDVSPISEIIDVK           | 42d | 28 |
| FBgn0010516 | 1080.22 | 84  | 1 | DPEAPIFQVADIGIVADLFK    | 46d | 28 |
| FBgn0010516 | 660.66  | 65  | 3 | FTHILAGASAFGK           | 46d | 28 |
| FBgn0010516 | 784.38  | 41  | 1 | IVAPELYIAVGISGAIQHLAGMK | 46d | 28 |
| FBgn0010516 | 715.13  | 73  | 2 | LDVSPISEIIDVK           | 46d | 28 |
| FBgn0010516 | 951.63  | 59  | 3 | AAVDAGFVPNDLQIGQTGK     | 50d | 28 |
| FBgn0010516 | 1080.05 | 102 | 1 | DPEAPIFQVADIGIVADLFK    | 50d | 28 |
| FBgn0010516 | 660.72  | 70  | 3 | FTHILAGASAFGK           | 50d | 28 |
| FBgn0010516 | 783.97  | 45  | 2 | IVAPELYIAVGISGAIQHLAGMK | 50d | 28 |
| FBgn0010516 | 714.95  | 70  | 3 | LDVSPISEIIDVK           | 50d | 28 |
| FBgn0010516 | 1079.82 | 64  | 1 | DPEAPIFQVADIGIVADLFK    | 52d | 28 |
| FBgn0010516 | 951.27  | 57  | 1 | AAVDAGFVPNDLQIGQTGK     | 56d | 28 |
| FBgn0010516 | 784.25  | 56  | 3 | IVAPELYIAVGISGAIQHLAGMK | 56d | 28 |
| FBgn0010516 | 714.7   | 66  | 2 | LDVSPISEIIDVK           | 56d | 28 |
| FBgn0010551 | 608.66  | 41  | 1 | IVQAEGEAEAAK            | 2d  | 18 |
| FBgn0010551 | 582.26  | 62  | 2 | LGGIQSDIYSEGLHVR        | 22d | 18 |
| FBgn0010612 | 795.78  | 56  | 2 | VELTPPTPADIPAIR         | 22d | 18 |
| FBgn0010704 | 397.24  | 36  | 1 | LRYQLKNVR               | 2d  | 18 |
| FBgn0010704 | 397.09  | 36  | 1 | LRYQLKNVR               | 62d | 18 |
| FBgn0010704 | 572.29  | 35  | 1 | GCILIELGLR              | 82d | 18 |

|             |         |    |   |                           |      |    |
|-------------|---------|----|---|---------------------------|------|----|
| FBgn0010704 | 397.24  | 36 | 1 | LRYQLKNVR                 | 82d  | 18 |
| FBgn0010704 | 397.05  | 36 | 2 | LRYQLKNVR                 | 2d   | 28 |
| FBgn0010715 | 843.78  | 34 | 1 | SSVSSDINSISPPAVQFAIGTPPTR | 42d  | 18 |
| FBgn0010808 | 1094.75 | 74 | 1 | TVSMENPTPAGVIDISDDVVK     | 102d | 18 |
| FBgn0010808 | 1094.72 | 64 | 2 | TVSMENPTPAGVIDISDDVVK     | 142d | 18 |
| FBgn0011211 | 514.32  | 46 | 3 | AVDSLVPIGR                | 2d   | 18 |
| FBgn0011211 | 777.61  | 42 | 1 | EAYPGDVFYLSHR             | 2d   | 18 |
| FBgn0011211 | 1183.8  | 75 | 1 | EVAFAAQFGSDLDAATQQLNR     | 2d   | 18 |
| FBgn0011211 | 720.28  | 55 | 3 | GIRPAINVGLSVSR            | 2d   | 18 |
| FBgn0011211 | 1045.09 | 75 | 2 | GMALNLEPDNVGVVVFNDK       | 2d   | 18 |
| FBgn0011211 | 644.93  | 65 | 2 | HALIYDDLK                 | 2d   | 18 |
| FBgn0011211 | 447.38  | 35 | 1 | LELAQYR                   | 2d   | 18 |
| FBgn0011211 | 631.31  | 72 | 4 | SAEISNILEER               | 2d   | 18 |
| FBgn0011211 | 651.45  | 73 | 3 | TALAI DTIINQK             | 2d   | 18 |
| FBgn0011211 | 806.66  | 52 | 1 | TGAIVDVPVGD ELLGR         | 2d   | 18 |
| FBgn0011211 | 645.86  | 89 | 5 | TSEQALLDTIAK              | 2d   | 18 |
| FBgn0011211 | 501.5   | 58 | 1 | VLSIGDGIAR                | 2d   | 18 |
| FBgn0011211 | 586.76  | 86 | 1 | VVDALGNAIDGK              | 2d   | 18 |
| FBgn0011211 | 514.27  | 46 | 4 | AVDSLVPIGR                | 22d  | 18 |
| FBgn0011211 | 720.47  | 39 | 1 | GIRPAINVGLSVSR            | 22d  | 18 |
| FBgn0011211 | 1045.1  | 42 | 1 | GMALNLEPDNVGVVVFNDK       | 22d  | 18 |
| FBgn0011211 | 644.66  | 56 | 2 | HALIYDDLK                 | 22d  | 18 |
| FBgn0011211 | 447.3   | 43 | 1 | LELAQYR                   | 22d  | 18 |
| FBgn0011211 | 631.24  | 86 | 3 | SAEISNILEER               | 22d  | 18 |
| FBgn0011211 | 651.32  | 78 | 3 | TALAI DTIINQK             | 22d  | 18 |
| FBgn0011211 | 806.37  | 59 | 2 | TGAIVDVPVGD ELLGR         | 22d  | 18 |
| FBgn0011211 | 645.95  | 78 | 6 | TSEQALLDTIAK              | 22d  | 18 |
| FBgn0011211 | 501.27  | 51 | 3 | VLSIGDGIAR                | 22d  | 18 |
| FBgn0011211 | 514.32  | 35 | 1 | AVDSLVPIGR                | 42d  | 18 |
| FBgn0011211 | 1183.66 | 79 | 2 | EVAFAAQFGSDLDAATQQLNR     | 42d  | 18 |
| FBgn0011211 | 534.6   | 56 | 2 | FNEAQDESK                 | 42d  | 18 |
| FBgn0011211 | 720.49  | 49 | 1 | GIRPAINVGLSVSR            | 42d  | 18 |

|             |         |    |   |                         |     |    |
|-------------|---------|----|---|-------------------------|-----|----|
| FBgn0011211 | 645.05  | 54 | 1 | HALIIYDDLSK             | 42d | 18 |
| FBgn0011211 | 354.57  | 35 | 1 | QAVAYR                  | 42d | 18 |
| FBgn0011211 | 431.32  | 36 | 1 | QMSLLLR                 | 42d | 18 |
| FBgn0011211 | 631.37  | 67 | 5 | SAEISNILEER             | 42d | 18 |
| FBgn0011211 | 651.45  | 77 | 2 | TALAI DTIINQK           | 42d | 18 |
| FBgn0011211 | 806.44  | 63 | 3 | TGAIVDVPVGD ELLGR       | 42d | 18 |
| FBgn0011211 | 645.98  | 66 | 1 | TSEQALLDTIAK            | 42d | 18 |
| FBgn0011211 | 501.46  | 48 | 2 | VLSIGDGIAR              | 42d | 18 |
| FBgn0011211 | 586.82  | 84 | 3 | VVDALGNAIDGK            | 42d | 18 |
| FBgn0011211 | 1107.57 | 65 | 2 | VYGLNNIQADEMVEFSSGLK    | 42d | 18 |
| FBgn0011211 | 514.38  | 46 | 3 | AVDSLVP IGR             | 62d | 18 |
| FBgn0011211 | 1183.4  | 56 | 1 | EVA AFAQFGSDLDAATQQLLNR | 62d | 18 |
| FBgn0011211 | 534.74  | 63 | 4 | FNEAQDESK               | 62d | 18 |
| FBgn0011211 | 644.2   | 48 | 3 | HALIIYDDLSK             | 62d | 18 |
| FBgn0011211 | 447.35  | 43 | 2 | LELAQYR                 | 62d | 18 |
| FBgn0011211 | 631.47  | 72 | 3 | SAEISNILEER             | 62d | 18 |
| FBgn0011211 | 423.89  | 40 | 2 | STVAQIVK                | 62d | 18 |
| FBgn0011211 | 651.53  | 76 | 2 | TALAI DTIINQK           | 62d | 18 |
| FBgn0011211 | 806.67  | 55 | 2 | TGAIVDVPVGD ELLGR       | 62d | 18 |
| FBgn0011211 | 645.43  | 70 | 4 | TSEQALLDTIAK            | 62d | 18 |
| FBgn0011211 | 501.36  | 65 | 5 | VLSIGDGIAR              | 62d | 18 |
| FBgn0011211 | 586.78  | 78 | 5 | VVDALGNAIDGK            | 62d | 18 |
| FBgn0011211 | 514.3   | 50 | 1 | AVDSLVP IGR             | 82d | 18 |
| FBgn0011211 | 458.31  | 39 | 1 | EFLQHIK                 | 82d | 18 |
| FBgn0011211 | 1183.09 | 41 | 1 | EVA AFAQFGSDLDAATQQLLNR | 82d | 18 |
| FBgn0011211 | 534.64  | 56 | 2 | FNEAQDESK               | 82d | 18 |
| FBgn0011211 | 644.85  | 71 | 2 | HALIIYDDLSK             | 82d | 18 |
| FBgn0011211 | 447.22  | 39 | 3 | LELAQYR                 | 82d | 18 |
| FBgn0011211 | 631.36  | 86 | 5 | SAEISNILEER             | 82d | 18 |
| FBgn0011211 | 651.16  | 93 | 3 | TALAI DTIINQK           | 82d | 18 |
| FBgn0011211 | 806.62  | 62 | 3 | TGAIVDVPVGD ELLGR       | 82d | 18 |
| FBgn0011211 | 645.94  | 88 | 3 | TSEQALLDTIAK            | 82d | 18 |

|             |         |     |   |                       |      |    |
|-------------|---------|-----|---|-----------------------|------|----|
| FBgn0011211 | 501.47  | 68  | 5 | VLSIGDGIAR            | 82d  | 18 |
| FBgn0011211 | 586.71  | 87  | 3 | VVDALGNAIDGK          | 82d  | 18 |
| FBgn0011211 | 1183.8  | 102 | 2 | EVAFAAQFGSDLDAATQQLNR | 102d | 18 |
| FBgn0011211 | 534.87  | 64  | 4 | FNEAQDESK             | 102d | 18 |
| FBgn0011211 | 1044.81 | 36  | 1 | GMALNLEPDNVGVVVFNDK   | 102d | 18 |
| FBgn0011211 | 644.75  | 71  | 4 | HALIYDDLK             | 102d | 18 |
| FBgn0011211 | 631.34  | 86  | 5 | SAEISNILEER           | 102d | 18 |
| FBgn0011211 | 651.26  | 81  | 3 | TALAITIINQK           | 102d | 18 |
| FBgn0011211 | 806.36  | 58  | 1 | TGAIVDVPVGDLLGR       | 102d | 18 |
| FBgn0011211 | 645.44  | 75  | 6 | TSEQALLDTIAK          | 102d | 18 |
| FBgn0011211 | 586.88  | 78  | 2 | VVDALGNAIDGK          | 102d | 18 |
| FBgn0011211 | 514.42  | 36  | 1 | AVDSLVPPIGR           | 112d | 18 |
| FBgn0011211 | 777.98  | 39  | 1 | EAYPGDVFYLSR          | 112d | 18 |
| FBgn0011211 | 1183.01 | 79  | 3 | EVAFAAQFGSDLDAATQQLNR | 112d | 18 |
| FBgn0011211 | 534.9   | 63  | 5 | FNEAQDESK             | 112d | 18 |
| FBgn0011211 | 598.7   | 47  | 2 | FNEAQDESKK            | 112d | 18 |
| FBgn0011211 | 644.87  | 58  | 1 | HALIYDDLK             | 112d | 18 |
| FBgn0011211 | 431.38  | 35  | 1 | QMSLLR                | 112d | 18 |
| FBgn0011211 | 612.87  | 48  | 1 | RFNEAQDESK            | 112d | 18 |
| FBgn0011211 | 631.38  | 67  | 3 | SAEISNILEER           | 112d | 18 |
| FBgn0011211 | 651.49  | 79  | 1 | TALAITIINQK           | 112d | 18 |
| FBgn0011211 | 806.63  | 49  | 3 | TGAIVDVPVGDLLGR       | 112d | 18 |
| FBgn0011211 | 645.82  | 71  | 4 | TSEQALLDTIAK          | 112d | 18 |
| FBgn0011211 | 501.47  | 51  | 1 | VLSIGDGIAR            | 112d | 18 |
| FBgn0011211 | 586.67  | 65  | 1 | VVDALGNAIDGK          | 112d | 18 |
| FBgn0011211 | 514.48  | 42  | 3 | AVDSLVPPIGR           | 122d | 18 |
| FBgn0011211 | 1183.5  | 85  | 2 | EVAFAAQFGSDLDAATQQLNR | 122d | 18 |
| FBgn0011211 | 534.96  | 61  | 4 | FNEAQDESK             | 122d | 18 |
| FBgn0011211 | 1044.71 | 65  | 2 | GMALNLEPDNVGVVVFNDK   | 122d | 18 |
| FBgn0011211 | 643.89  | 53  | 1 | HALIYDDLK             | 122d | 18 |
| FBgn0011211 | 447.2   | 43  | 2 | LELAQYR               | 122d | 18 |
| FBgn0011211 | 631.26  | 73  | 3 | SAEISNILEER           | 122d | 18 |

|             |         |    |   |                        |      |    |
|-------------|---------|----|---|------------------------|------|----|
| FBgn0011211 | 651.31  | 93 | 3 | TALAI DTIINQK          | 122d | 18 |
| FBgn0011211 | 645.98  | 75 | 6 | TSEQALLDTIAK           | 122d | 18 |
| FBgn0011211 | 501.45  | 49 | 4 | VLSIGDGIAR             | 122d | 18 |
| FBgn0011211 | 586.98  | 77 | 2 | VVDALGNAIDGK           | 122d | 18 |
| FBgn0011211 | 514.03  | 41 | 3 | AVDSLVPPIGR            | 132d | 18 |
| FBgn0011211 | 789.35  | 60 | 1 | EVA AFAQFGSDLDAATQQLNR | 132d | 18 |
| FBgn0011211 | 534.98  | 58 | 1 | FNEAQDESK              | 132d | 18 |
| FBgn0011211 | 645.05  | 61 | 2 | HALIIYDDL SK           | 132d | 18 |
| FBgn0011211 | 431.36  | 45 | 2 | QMSLLLR                | 132d | 18 |
| FBgn0011211 | 631.52  | 64 | 2 | SAEISNILEER            | 132d | 18 |
| FBgn0011211 | 651.55  | 77 | 1 | TALAI DTIINQK          | 132d | 18 |
| FBgn0011211 | 806.37  | 63 | 2 | TGAIVDVPVGD ELLGR      | 132d | 18 |
| FBgn0011211 | 646.07  | 68 | 5 | TSEQALLDTIAK           | 132d | 18 |
| FBgn0011211 | 501.18  | 52 | 3 | VLSIGDGIAR             | 132d | 18 |
| FBgn0011211 | 452.96  | 38 | 1 | EPMQTGIK               | 142d | 18 |
| FBgn0011211 | 1183.62 | 79 | 2 | EVA AFAQFGSDLDAATQQLNR | 142d | 18 |
| FBgn0011211 | 534.84  | 61 | 1 | FNEAQDESK              | 142d | 18 |
| FBgn0011211 | 644.38  | 61 | 4 | HALIIYDDL SK           | 142d | 18 |
| FBgn0011211 | 631.14  | 86 | 2 | SAEISNILEER            | 142d | 18 |
| FBgn0011211 | 651.6   | 75 | 3 | TALAI DTIINQK          | 142d | 18 |
| FBgn0011211 | 645.79  | 73 | 5 | TSEQALLDTIAK           | 142d | 18 |
| FBgn0011211 | 501.48  | 50 | 1 | VLSIGDGIAR             | 142d | 18 |
| FBgn0011211 | 586.85  | 75 | 2 | VVDALGNAIDGK           | 142d | 18 |
| FBgn0011211 | 514.21  | 43 | 4 | AVDSLVPPIGR            | 2d   | 28 |
| FBgn0011211 | 1183.55 | 97 | 2 | EVA AFAQFGSDLDAATQQLNR | 2d   | 28 |
| FBgn0011211 | 534.65  | 61 | 3 | FNEAQDESK              | 2d   | 28 |
| FBgn0011211 | 644.85  | 71 | 2 | HALIIYDDL SK           | 2d   | 28 |
| FBgn0011211 | 447.39  | 43 | 3 | LELAQYR                | 2d   | 28 |
| FBgn0011211 | 354.73  | 35 | 1 | QAVAYR                 | 2d   | 28 |
| FBgn0011211 | 631.15  | 66 | 3 | SAEISNILEER            | 2d   | 28 |
| FBgn0011211 | 651.28  | 81 | 3 | TALAI DTIINQK          | 2d   | 28 |
| FBgn0011211 | 806.14  | 79 | 1 | TGAIVDVPVGD ELLGR      | 2d   | 28 |

|             |         |    |   |                       |     |    |
|-------------|---------|----|---|-----------------------|-----|----|
| FBgn0011211 | 645.58  | 89 | 3 | TSEQALLDTIAK          | 2d  | 28 |
| FBgn0011211 | 501.17  | 52 | 3 | VLSIGDGIAR            | 2d  | 28 |
| FBgn0011211 | 586.94  | 86 | 6 | VVDALGNAIDGK          | 2d  | 28 |
| FBgn0011211 | 514.12  | 48 | 6 | AVDSLVPIGR            | 12d | 28 |
| FBgn0011211 | 1183.76 | 94 | 3 | EVAFAAQFGSDLDAATQQLNR | 12d | 28 |
| FBgn0011211 | 534.64  | 56 | 2 | FNEAQDESK             | 12d | 28 |
| FBgn0011211 | 720.31  | 53 | 2 | GIRPAINVGLSVSR        | 12d | 28 |
| FBgn0011211 | 1045.09 | 60 | 1 | GMALNLEPDNVGVVFGNDK   | 12d | 28 |
| FBgn0011211 | 447.23  | 37 | 2 | LELAQR                | 12d | 28 |
| FBgn0011211 | 631.38  | 72 | 4 | SAEISNILEER           | 12d | 28 |
| FBgn0011211 | 651.38  | 94 | 5 | TALAITIINQK           | 12d | 28 |
| FBgn0011211 | 805.99  | 49 | 2 | TGAIVDVPVGDPELLGR     | 12d | 28 |
| FBgn0011211 | 645.78  | 75 | 6 | TSEQALLDTIAK          | 12d | 28 |
| FBgn0011211 | 501.44  | 44 | 2 | VLSIGDGIAR            | 12d | 28 |
| FBgn0011211 | 586.88  | 86 | 7 | VVDALGNAIDGK          | 12d | 28 |
| FBgn0011211 | 1107.58 | 74 | 3 | VYGLNNIQADEMVEFSSGLK  | 12d | 28 |
| FBgn0011211 | 514.21  | 47 | 2 | AVDSLVPIGR            | 22d | 28 |
| FBgn0011211 | 720.49  | 40 | 2 | GIRPAINVGLSVSR        | 22d | 28 |
| FBgn0011211 | 1045.23 | 79 | 2 | GMALNLEPDNVGVVFGNDK   | 22d | 28 |
| FBgn0011211 | 644.87  | 68 | 2 | HALIYDDLSK            | 22d | 28 |
| FBgn0011211 | 447.31  | 39 | 1 | LELAQR                | 22d | 28 |
| FBgn0011211 | 630.92  | 61 | 3 | SAEISNILEER           | 22d | 28 |
| FBgn0011211 | 651.54  | 77 | 2 | TALAITIINQK           | 22d | 28 |
| FBgn0011211 | 806.2   | 61 | 3 | TGAIVDVPVGDPELLGR     | 22d | 28 |
| FBgn0011211 | 645.84  | 83 | 6 | TSEQALLDTIAK          | 22d | 28 |
| FBgn0011211 | 501.27  | 59 | 2 | VLSIGDGIAR            | 22d | 28 |
| FBgn0011211 | 586.94  | 86 | 3 | VVDALGNAIDGK          | 22d | 28 |
| FBgn0011211 | 514.51  | 43 | 4 | AVDSLVPIGR            | 32d | 28 |
| FBgn0011211 | 452.51  | 36 | 1 | EPMQTGIK              | 32d | 28 |
| FBgn0011211 | 1183.59 | 85 | 2 | EVAFAAQFGSDLDAATQQLNR | 32d | 28 |
| FBgn0011211 | 534.6   | 58 | 2 | FNEAQDESK             | 32d | 28 |
| FBgn0011211 | 720.46  | 45 | 1 | GIRPAINVGLSVSR        | 32d | 28 |

|             |         |     |   |                        |     |    |
|-------------|---------|-----|---|------------------------|-----|----|
| FBgn0011211 | 1045.18 | 90  | 2 | GMALNLEPDNVGVVVFNDK    | 32d | 28 |
| FBgn0011211 | 644.59  | 66  | 3 | HALIYDDLK              | 32d | 28 |
| FBgn0011211 | 447.12  | 43  | 3 | LELAQYR                | 32d | 28 |
| FBgn0011211 | 631.19  | 64  | 3 | SAEISNILEER            | 32d | 28 |
| FBgn0011211 | 651.43  | 83  | 4 | TALAI DTIINQK          | 32d | 28 |
| FBgn0011211 | 806.37  | 62  | 3 | TGAIVDVPVGD ELLGR      | 32d | 28 |
| FBgn0011211 | 645.79  | 62  | 3 | TSEQALLDTIAK           | 32d | 28 |
| FBgn0011211 | 501.36  | 50  | 2 | VLSIGDGIAR             | 32d | 28 |
| FBgn0011211 | 586.92  | 84  | 4 | VVDALGNAIDGK           | 32d | 28 |
| FBgn0011211 | 514.16  | 46  | 5 | AVDSLVP IGR            | 36d | 28 |
| FBgn0011211 | 789.33  | 89  | 3 | EVA AFAQFGSDLDAATQQLNR | 36d | 28 |
| FBgn0011211 | 534.82  | 54  | 2 | FNEAQDESK              | 36d | 28 |
| FBgn0011211 | 720.35  | 42  | 2 | GIRPAINVGLSVSR         | 36d | 28 |
| FBgn0011211 | 1045.13 | 72  | 2 | GMALNLEPDNVGVVVFNDK    | 36d | 28 |
| FBgn0011211 | 644.84  | 68  | 2 | HALIYDDLK              | 36d | 28 |
| FBgn0011211 | 447.12  | 39  | 1 | LELAQYR                | 36d | 28 |
| FBgn0011211 | 631.3   | 72  | 3 | SAEISNILEER            | 36d | 28 |
| FBgn0011211 | 651.16  | 83  | 5 | TALAI DTIINQK          | 36d | 28 |
| FBgn0011211 | 806.61  | 59  | 2 | TGAIVDVPVGD ELLGR      | 36d | 28 |
| FBgn0011211 | 646.02  | 70  | 3 | TSEQALLDTIAK           | 36d | 28 |
| FBgn0011211 | 501.16  | 41  | 2 | VLSIGDGIAR             | 36d | 28 |
| FBgn0011211 | 586.68  | 76  | 2 | VVDALGNAIDGK           | 36d | 28 |
| FBgn0011211 | 1107.54 | 51  | 1 | VYGLNNIQADEMVEFSSGLK   | 36d | 28 |
| FBgn0011211 | 362.63  | 41  | 2 | APGIIPR                | 42d | 28 |
| FBgn0011211 | 514.18  | 41  | 3 | AVDSLVP IGR            | 42d | 28 |
| FBgn0011211 | 1183.78 | 106 | 3 | EVA AFAQFGSDLDAATQQLNR | 42d | 28 |
| FBgn0011211 | 534.83  | 61  | 9 | FNEAQDESK              | 42d | 28 |
| FBgn0011211 | 720.29  | 45  | 2 | GIRPAINVGLSVSR         | 42d | 28 |
| FBgn0011211 | 1045.14 | 69  | 2 | GMALNLEPDNVGVVVFNDK    | 42d | 28 |
| FBgn0011211 | 644.72  | 71  | 2 | HALIYDDLK              | 42d | 28 |
| FBgn0011211 | 447.17  | 37  | 1 | LELAQYR                | 42d | 28 |
| FBgn0011211 | 430.93  | 38  | 2 | QMSLLLR                | 42d | 28 |

|             |         |    |   |                         |     |    |
|-------------|---------|----|---|-------------------------|-----|----|
| FBgn0011211 | 631.39  | 64 | 1 | SAEISNILEER             | 42d | 28 |
| FBgn0011211 | 423.6   | 45 | 1 | STVAQIVK                | 42d | 28 |
| FBgn0011211 | 651.6   | 91 | 3 | TALAI DTIINQK           | 42d | 28 |
| FBgn0011211 | 806.52  | 62 | 2 | TGAI DV VPV GDELLGR     | 42d | 28 |
| FBgn0011211 | 645.82  | 77 | 6 | TSEQALLDTIAK            | 42d | 28 |
| FBgn0011211 | 381.26  | 50 | 1 | VGSAAQTK                | 42d | 28 |
| FBgn0011211 | 501.17  | 56 | 1 | VLSIGDGIAR              | 42d | 28 |
| FBgn0011211 | 586.91  | 78 | 3 | VVDALGNAIDGK            | 42d | 28 |
| FBgn0011211 | 1107.84 | 65 | 2 | VYGLNNIQADEMVEFSSGLK    | 42d | 28 |
| FBgn0011211 | 514.34  | 41 | 1 | AVDSLVPPIGR             | 46d | 28 |
| FBgn0011211 | 789.56  | 72 | 2 | EVA AFAQFGSDLDAATQQLLNR | 46d | 28 |
| FBgn0011211 | 534.88  | 61 | 3 | FNEAQDESK               | 46d | 28 |
| FBgn0011211 | 720.43  | 56 | 1 | GIRPAINVGLSVSR          | 46d | 28 |
| FBgn0011211 | 1045.25 | 54 | 1 | GMALNLEPDNVGVVVFNDK     | 46d | 28 |
| FBgn0011211 | 644.73  | 70 | 3 | HALIYDDLK               | 46d | 28 |
| FBgn0011211 | 447.15  | 37 | 3 | LELAQYR                 | 46d | 28 |
| FBgn0011211 | 431.41  | 49 | 1 | QMSLLLR                 | 46d | 28 |
| FBgn0011211 | 631.21  | 67 | 2 | SAEISNILEER             | 46d | 28 |
| FBgn0011211 | 651.47  | 87 | 3 | TALAI DTIINQK           | 46d | 28 |
| FBgn0011211 | 806.13  | 84 | 3 | TGAI DV VPV GDELLGR     | 46d | 28 |
| FBgn0011211 | 645.97  | 79 | 2 | TSEQALLDTIAK            | 46d | 28 |
| FBgn0011211 | 501.12  | 46 | 3 | VLSIGDGIAR              | 46d | 28 |
| FBgn0011211 | 586.73  | 80 | 3 | VVDALGNAIDGK            | 46d | 28 |
| FBgn0011211 | 1108.2  | 35 | 1 | VYGLNNIQADEMVEFSSGLK    | 46d | 28 |
| FBgn0011211 | 514.3   | 44 | 1 | AVDSLVPPIGR             | 50d | 28 |
| FBgn0011211 | 1183.63 | 98 | 3 | EVA AFAQFGSDLDAATQQLLNR | 50d | 28 |
| FBgn0011211 | 534.78  | 56 | 5 | FNEAQDESK               | 50d | 28 |
| FBgn0011211 | 1045.14 | 85 | 1 | GMALNLEPDNVGVVVFNDK     | 50d | 28 |
| FBgn0011211 | 644.72  | 63 | 4 | HALIYDDLK               | 50d | 28 |
| FBgn0011211 | 446.99  | 35 | 2 | LELAQYR                 | 50d | 28 |
| FBgn0011211 | 431.22  | 49 | 1 | QMSLLLR                 | 50d | 28 |
| FBgn0011211 | 631.22  | 73 | 3 | SAEISNILEER             | 50d | 28 |



|             |         |    |   |                        |     |    |
|-------------|---------|----|---|------------------------|-----|----|
| FBgn0011211 | 651.51  | 80 | 6 | TALAI DTIINQK          | 50d | 28 |
| FBgn0011211 | 806.29  | 66 | 2 | TGAIVDVPVGD ELLGR      | 50d | 28 |
| FBgn0011211 | 645.89  | 76 | 5 | TSEQALLDTIAK           | 50d | 28 |
| FBgn0011211 | 501.32  | 58 | 3 | VLSIGDGIAR             | 50d | 28 |
| FBgn0011211 | 586.73  | 80 | 2 | VVDALGNAIDGK           | 50d | 28 |
| FBgn0011211 | 514.01  | 42 | 5 | AVDSLVP IGR            | 52d | 28 |
| FBgn0011211 | 534.94  | 64 | 1 | FNEAQDESK              | 52d | 28 |
| FBgn0011211 | 1045.21 | 79 | 1 | GMALNLEPDNVGVVFGNDK    | 52d | 28 |
| FBgn0011211 | 644.85  | 76 | 4 | HALIYDDL SK            | 52d | 28 |
| FBgn0011211 | 447.16  | 43 | 3 | LELAQYR                | 52d | 28 |
| FBgn0011211 | 631.16  | 72 | 3 | SAEISNILEER            | 52d | 28 |
| FBgn0011211 | 651.34  | 85 | 6 | TALAI DTIINQK          | 52d | 28 |
| FBgn0011211 | 806.37  | 87 | 2 | TGAIVDVPVGD ELLGR      | 52d | 28 |
| FBgn0011211 | 645.86  | 78 | 6 | TSEQALLDTIAK           | 52d | 28 |
| FBgn0011211 | 501.28  | 50 | 3 | VLSIGDGIAR             | 52d | 28 |
| FBgn0011211 | 586.76  | 76 | 2 | VVDALGNAIDGK           | 52d | 28 |
| FBgn0011211 | 514.28  | 39 | 1 | AVDSLVP IGR            | 56d | 28 |
| FBgn0011211 | 532.64  | 65 | 2 | DGAISEASDAK            | 56d | 28 |
| FBgn0011211 | 458.05  | 36 | 2 | EFLQHIK                | 56d | 28 |
| FBgn0011211 | 1183.22 | 69 | 2 | EVA AFAQFGSDLDAATQQLNR | 56d | 28 |
| FBgn0011211 | 534.7   | 59 | 5 | FNEAQDESK              | 56d | 28 |
| FBgn0011211 | 1045.05 | 53 | 2 | GMALNLEPDNVGVVFGNDK    | 56d | 28 |
| FBgn0011211 | 644.68  | 66 | 7 | HALIYDDL SK            | 56d | 28 |
| FBgn0011211 | 431.28  | 34 | 1 | QMSLLLR                | 56d | 28 |
| FBgn0011211 | 631.28  | 73 | 3 | SAEISNILEER            | 56d | 28 |
| FBgn0011211 | 651.14  | 88 | 5 | TALAI DTIINQK          | 56d | 28 |
| FBgn0011211 | 806.39  | 67 | 2 | TGAIVDVPVGD ELLGR      | 56d | 28 |
| FBgn0011211 | 645.96  | 70 | 6 | TSEQALLDTIAK           | 56d | 28 |
| FBgn0011211 | 501.38  | 44 | 1 | VLSIGDGIAR             | 56d | 28 |
| FBgn0011211 | 586.95  | 78 | 3 | VVDALGNAIDGK           | 56d | 28 |
| FBgn0011211 | 1108.08 | 53 | 2 | VYGLNNIQADEMVEFSSGLK   | 56d | 28 |
| FBgn0011219 | 615.83  | 75 | 1 | VPSNTAVVEG EK          | 2d  | 18 |

|             |         |     |   |                       |      |    |
|-------------|---------|-----|---|-----------------------|------|----|
| FBgn0011270 | 558.37  | 47  | 1 | HGESEWNQK             | 42d  | 28 |
| FBgn0011272 | 510.66  | 36  | 1 | TWFNQPAR              | 2d   | 18 |
| FBgn0011280 | 1172.45 | 110 | 1 | AETGATDEDVEQLMSHDLPER | 42d  | 18 |
| FBgn0011280 | 629.78  | 65  | 1 | DHAAELANECK           | 42d  | 18 |
| FBgn0011280 | 630.02  | 63  | 2 | DHAAELANECK           | 62d  | 18 |
| FBgn0011280 | 629.94  | 63  | 1 | DHAAELANECK           | 102d | 18 |
| FBgn0011280 | 1172.46 | 115 | 3 | AETGATDEDVEQLMSHDLPER | 12d  | 28 |
| FBgn0011280 | 629.73  | 61  | 1 | DHAAELANECK           | 12d  | 28 |
| FBgn0011280 | 1172.7  | 97  | 1 | AETGATDEDVEQLMSHDLPER | 22d  | 28 |
| FBgn0011280 | 1172.37 | 110 | 1 | AETGATDEDVEQLMSHDLPER | 32d  | 28 |
| FBgn0011280 | 1172.4  | 80  | 1 | AETGATDEDVEQLMSHDLPER | 52d  | 28 |
| FBgn0011288 | 732.74  | 85  | 3 | PADPSEEVAPQVPK        | 2d   | 28 |
| FBgn0011288 | 732.93  | 56  | 1 | PADPSEEVAPQVPK        | 12d  | 28 |
| FBgn0011361 | 506.32  | 36  | 2 | LLKPADIHK             | 2d   | 18 |
| FBgn0011361 | 616.23  | 48  | 2 | YVADKEDVYE            | 2d   | 18 |
| FBgn0011361 | 506.14  | 58  | 3 | LLKPADIHK             | 42d  | 18 |
| FBgn0011361 | 506.32  | 46  | 1 | LLKPADIHK             | 62d  | 18 |
| FBgn0011361 | 616.24  | 49  | 3 | YVADKEDVYE            | 62d  | 18 |
| FBgn0011361 | 506.17  | 34  | 1 | LLKPADIHK             | 82d  | 18 |
| FBgn0011361 | 506.09  | 56  | 1 | LLKPADIHK             | 2d   | 28 |
| FBgn0011361 | 616.15  | 42  | 1 | YVADKEDVYE            | 2d   | 28 |
| FBgn0011361 | 506.41  | 36  | 1 | LLKPADIHK             | 12d  | 28 |
| FBgn0011361 | 616.34  | 37  | 1 | YVADKEDVYE            | 12d  | 28 |
| FBgn0011361 | 616.08  | 48  | 1 | YVADKEDVYE            | 22d  | 28 |
| FBgn0011361 | 616.45  | 39  | 1 | YVADKEDVYE            | 32d  | 28 |
| FBgn0011361 | 616.32  | 44  | 1 | YVADKEDVYE            | 36d  | 28 |
| FBgn0011361 | 616.29  | 43  | 1 | YVADKEDVYE            | 42d  | 28 |
| FBgn0011361 | 616.26  | 48  | 2 | YVADKEDVYE            | 46d  | 28 |
| FBgn0011361 | 616.26  | 43  | 1 | YVADKEDVYE            | 50d  | 28 |
| FBgn0011361 | 616.17  | 36  | 2 | YVADKEDVYE            | 52d  | 28 |
| FBgn0011559 | 522.64  | 35  | 1 | LKEQEQLR              | 62d  | 18 |
| FBgn0011559 | 721.21  | 60  | 1 | LGLGQQIQSQLQK         | 82d  | 18 |

|             |         |     |   |                                  |      |    |
|-------------|---------|-----|---|----------------------------------|------|----|
| FBgn0011559 | 603.85  | 36  | 1 | NTLLLDQSSSK                      | 82d  | 18 |
| FBgn0011559 | 741.07  | 73  | 3 | SDTQTQSQLQESK                    | 82d  | 18 |
| FBgn0011559 | 910.89  | 91  | 2 | SNEQSAAQSASQIQSQR                | 82d  | 18 |
| FBgn0011559 | 1089.02 | 74  | 1 | SNSLSQSQSQSQEQLQLQR              | 82d  | 18 |
| FBgn0011559 | 1232.92 | 78  | 1 | YADSQSQSQSQSASQSESNASSQFQAQEQSNR | 82d  | 18 |
| FBgn0011559 | 1215.8  | 45  | 1 | DILSPPIFGVNPQPLIEVQQPK           | 102d | 18 |
| FBgn0011559 | 1025.59 | 53  | 1 | TSSSSSHSNSQNSQSSSSQSSQASQSEAQR   | 102d | 18 |
| FBgn0011559 | 1232.98 | 84  | 1 | YADSQSQSQSQSASQSESNASSQFQAQEQSNR | 102d | 18 |
| FBgn0011559 | 757.26  | 39  | 2 | LEMQNIRELLQK                     | 112d | 18 |
| FBgn0011559 | 873.86  | 51  | 2 | SESSSQSSSHSSSQSTSNESSNVQSK       | 112d | 18 |
| FBgn0011573 | 1035.55 | 36  | 2 | LGPGGLDPADVFESELPDELK            | 2d   | 28 |
| FBgn0011573 | 1035.45 | 68  | 2 | LGPGGLDPADVFESELPDELK            | 56d  | 28 |
| FBgn0011581 | 1019.46 | 50  | 2 | SYINNEASALVANSDDLLK              | 22d  | 18 |
| FBgn0011581 | 1019.7  | 88  | 3 | SYINNEASALVANSDDLLK              | 42d  | 18 |
| FBgn0011581 | 1018.91 | 66  | 1 | SYINNEASALVANSDDLLK              | 62d  | 18 |
| FBgn0011581 | 551.61  | 62  | 1 | TDVDHVFLR                        | 62d  | 18 |
| FBgn0011581 | 953.38  | 53  | 1 | KVCQALENSDQLTSALK                | 82d  | 18 |
| FBgn0011581 | 1019.5  | 114 | 3 | SYINNEASALVANSDDLLK              | 82d  | 18 |
| FBgn0011581 | 1019.48 | 75  | 2 | SYINNEASALVANSDDLLK              | 102d | 18 |
| FBgn0011581 | 1019.69 | 91  | 3 | SYINNEASALVANSDDLLK              | 112d | 18 |
| FBgn0011581 | 953.44  | 35  | 1 | KVCQALENSDQLTSALK                | 122d | 18 |
| FBgn0011581 | 1019.19 | 75  | 1 | SYINNEASALVANSDDLLK              | 122d | 18 |
| FBgn0011581 | 953.55  | 98  | 3 | KVCQALENSDQLTSALK                | 132d | 18 |
| FBgn0011581 | 1019.38 | 73  | 1 | SYINNEASALVANSDDLLK              | 142d | 18 |
| FBgn0011581 | 1019.3  | 105 | 1 | SYINNEASALVANSDDLLK              | 2d   | 28 |
| FBgn0011581 | 1019.53 | 39  | 1 | SYINNEASALVANSDDLLK              | 12d  | 28 |
| FBgn0011581 | 1019.25 | 102 | 2 | SYINNEASALVANSDDLLK              | 32d  | 28 |
| FBgn0011581 | 1019.69 | 84  | 2 | SYINNEASALVANSDDLLK              | 36d  | 28 |
| FBgn0011581 | 1019.42 | 95  | 2 | SYINNEASALVANSDDLLK              | 42d  | 28 |
| FBgn0011581 | 1019.34 | 80  | 3 | SYINNEASALVANSDDLLK              | 46d  | 28 |
| FBgn0011581 | 1019.47 | 81  | 2 | SYINNEASALVANSDDLLK              | 50d  | 28 |
| FBgn0011581 | 1019.58 | 81  | 1 | SYINNEASALVANSDDLLK              | 52d  | 28 |

|             |         |    |   |                       |      |    |
|-------------|---------|----|---|-----------------------|------|----|
| FBgn0011581 | 889.56  | 34 | 1 | VCQALENSDQLTSALK      | 52d  | 28 |
| FBgn0011581 | 1019.46 | 89 | 2 | SYINNEASALVANSDDLK    | 56d  | 28 |
| FBgn0011638 | 873.11  | 39 | 1 | LASLSTDLEIVAALNK      | 2d   | 18 |
| FBgn0011638 | 1122.67 | 58 | 1 | GFPLDSQISELLDFAANYDK  | 42d  | 18 |
| FBgn0011638 | 873.44  | 37 | 1 | LASLSTDLEIVAALNK      | 42d  | 18 |
| FBgn0011638 | 873.36  | 54 | 1 | LASLSTDLEIVAALNK      | 62d  | 18 |
| FBgn0011638 | 873.49  | 64 | 1 | LASLSTDLEIVAALNK      | 102d | 18 |
| FBgn0011638 | 873.6   | 52 | 1 | LASLSTDLEIVAALNK      | 112d | 18 |
| FBgn0011638 | 873.69  | 50 | 1 | LASLSTDLEIVAALNK      | 12d  | 28 |
| FBgn0011638 | 873.17  | 55 | 1 | LASLSTDLEIVAALNK      | 36d  | 28 |
| FBgn0011638 | 873.3   | 64 | 3 | LASLSTDLEIVAALNK      | 42d  | 28 |
| FBgn0011638 | 873.58  | 43 | 1 | LASLSTDLEIVAALNK      | 46d  | 28 |
| FBgn0011638 | 873.69  | 84 | 1 | LASLSTDLEIVAALNK      | 50d  | 28 |
| FBgn0011643 | 1099.29 | 91 | 2 | GYFGGGAGCLSTDTGAHLNRE | 2d   | 18 |
| FBgn0011643 | 507.57  | 37 | 2 | PFVPVETPK             | 2d   | 18 |
| FBgn0011643 | 690.38  | 37 | 1 | GYFGGGAGCLSTDTGAHLNR  | 22d  | 18 |
| FBgn0011643 | 733.23  | 49 | 1 | GYFGGGAGCLSTDTGAHLNRE | 22d  | 18 |
| FBgn0011643 | 703.17  | 78 | 1 | ALDSTNCTEHEK          | 62d  | 18 |
| FBgn0011643 | 507.77  | 43 | 5 | PFVPVETPK             | 62d  | 18 |
| FBgn0011643 | 507.88  | 51 | 2 | PFVPVETPK             | 102d | 18 |
| FBgn0011643 | 507.98  | 55 | 5 | PFVPVETPK             | 2d   | 28 |
| FBgn0011643 | 1099.28 | 88 | 2 | GYFGGGAGCLSTDTGAHLNRE | 12d  | 28 |
| FBgn0011643 | 507.95  | 47 | 2 | PFVPVETPK             | 12d  | 28 |
| FBgn0011643 | 733.45  | 40 | 1 | GYFGGGAGCLSTDTGAHLNRE | 36d  | 28 |
| FBgn0011643 | 507.8   | 66 | 1 | PFVPVETPK             | 42d  | 28 |
| FBgn0011643 | 703.42  | 49 | 1 | ALDSTNCTEHEK          | 50d  | 28 |
| FBgn0011643 | 733.49  | 56 | 1 | GYFGGGAGCLSTDTGAHLNRE | 50d  | 28 |
| FBgn0011643 | 703.11  | 63 | 1 | ALDSTNCTEHEK          | 52d  | 28 |
| FBgn0011643 | 1099.22 | 81 | 3 | GYFGGGAGCLSTDTGAHLNRE | 52d  | 28 |
| FBgn0011643 | 703.42  | 35 | 1 | ALDSTNCTEHEK          | 56d  | 28 |
| FBgn0011661 | 1026.59 | 41 | 1 | FYPEDVAEELIQDITLR     | 2d   | 18 |
| FBgn0011661 | 553.29  | 47 | 1 | IGFPWSEIR             | 2d   | 18 |

|             |         |     |   |                        |      |    |
|-------------|---------|-----|---|------------------------|------|----|
| FBgn0011661 | 1026.74 | 67  | 2 | FYPEDVAEELIQDITLR      | 42d  | 18 |
| FBgn0011661 | 1026.31 | 42  | 1 | FYPEDVAEELIQDITLR      | 62d  | 18 |
| FBgn0011661 | 553.33  | 49  | 1 | IGFPWSEIR              | 62d  | 18 |
| FBgn0011661 | 1026.39 | 72  | 2 | FYPEDVAEELIQDITLR      | 82d  | 18 |
| FBgn0011661 | 684.84  | 64  | 2 | FYPEDVAEELIQDITLR      | 102d | 18 |
| FBgn0011661 | 552.92  | 51  | 2 | IGFPWSEIR              | 122d | 18 |
| FBgn0011661 | 553.12  | 37  | 2 | IGFPWSEIR              | 132d | 18 |
| FBgn0011661 | 553.44  | 44  | 2 | IGFPWSEIR              | 142d | 18 |
| FBgn0011661 | 684.51  | 45  | 1 | FYPEDVAEELIQDITLR      | 2d   | 28 |
| FBgn0011661 | 552.78  | 36  | 1 | IGFPWSEIR              | 22d  | 28 |
| FBgn0011668 | 748.38  | 77  | 3 | SQNTNHNVIVIGAK         | 82d  | 18 |
| FBgn0011693 | 648.89  | 45  | 3 | AAHPTQSVMIIK           | 2d   | 18 |
| FBgn0011693 | 605.88  | 51  | 2 | GVEATYEEIAK            | 2d   | 18 |
| FBgn0011693 | 736.26  | 55  | 1 | IIFPETSDETYR           | 2d   | 18 |
| FBgn0011693 | 764.89  | 107 | 2 | NAVVTGGAGGIGLQVSK      | 2d   | 18 |
| FBgn0011693 | 858.59  | 40  | 1 | RVYPLEIKPQWTGK         | 2d   | 18 |
| FBgn0011693 | 780.24  | 36  | 2 | VYPLEIKPQWTGK          | 2d   | 18 |
| FBgn0011693 | 648.84  | 50  | 3 | AAHPTQSVMIIK           | 22d  | 18 |
| FBgn0011693 | 605.94  | 60  | 5 | GVEATYEEIAK            | 22d  | 18 |
| FBgn0011693 | 736.19  | 78  | 6 | IIFPETSDETYR           | 22d  | 18 |
| FBgn0011693 | 669.7   | 89  | 2 | KGVEATYEEIAK           | 22d  | 18 |
| FBgn0011693 | 765.14  | 104 | 3 | NAVVTGGAGGIGLQVSK      | 22d  | 18 |
| FBgn0011693 | 520.36  | 35  | 1 | VYPLEIKPQWTGK          | 22d  | 18 |
| FBgn0011693 | 648.9   | 46  | 3 | AAHPTQSVMIIK           | 42d  | 18 |
| FBgn0011693 | 446.76  | 48  | 3 | AGIINFTR               | 42d  | 18 |
| FBgn0011693 | 766.83  | 50  | 1 | FVTVCPGATMTDMFTNFTEK   | 42d  | 18 |
| FBgn0011693 | 736.4   | 65  | 5 | IIFPETSDETYR           | 42d  | 18 |
| FBgn0011693 | 858.12  | 51  | 1 | RVYPLEIKPQWTGK         | 42d  | 18 |
| FBgn0011693 | 1138.82 | 91  | 2 | TLLVNLGGIINSTLSALPYMGK | 42d  | 18 |
| FBgn0011693 | 780.49  | 54  | 3 | VYPLEIKPQWTGK          | 42d  | 18 |
| FBgn0011693 | 605.95  | 71  | 4 | GVEATYEEIAK            | 62d  | 18 |
| FBgn0011693 | 736.24  | 57  | 5 | IIFPETSDETYR           | 62d  | 18 |

|             |         |     |   |                        |      |    |
|-------------|---------|-----|---|------------------------|------|----|
| FBgn0011693 | 669.75  | 80  | 1 | KGVEATYEEIAK           | 62d  | 18 |
| FBgn0011693 | 764.96  | 115 | 2 | NAVVTGGAGGIGLQVSK      | 62d  | 18 |
| FBgn0011693 | 780.54  | 47  | 1 | VYPLEIKPQWTGK          | 62d  | 18 |
| FBgn0011693 | 1149.64 | 83  | 1 | FVTVCPGATMTDMFTNFTEK   | 82d  | 18 |
| FBgn0011693 | 605.67  | 64  | 2 | GVEATYEEIAK            | 82d  | 18 |
| FBgn0011693 | 736.52  | 65  | 2 | IIFPETSDETYR           | 82d  | 18 |
| FBgn0011693 | 669.92  | 77  | 1 | KGVEATYEEIAK           | 82d  | 18 |
| FBgn0011693 | 780.2   | 44  | 2 | VYPLEIKPQWTGK          | 82d  | 18 |
| FBgn0011693 | 1149.46 | 63  | 1 | FVTVCPGATMTDMFTNFTEK   | 102d | 18 |
| FBgn0011693 | 736.27  | 64  | 2 | IIFPETSDETYR           | 102d | 18 |
| FBgn0011693 | 417.94  | 53  | 1 | QSAADVSR               | 102d | 18 |
| FBgn0011693 | 780.4   | 45  | 2 | VYPLEIKPQWTGK          | 102d | 18 |
| FBgn0011693 | 446.95  | 45  | 1 | AGIINFTR               | 112d | 18 |
| FBgn0011693 | 1149.53 | 71  | 2 | FVTVCPGATMTDMFTNFTEK   | 112d | 18 |
| FBgn0011693 | 736.1   | 65  | 1 | IIFPETSDETYR           | 112d | 18 |
| FBgn0011693 | 417.64  | 54  | 1 | QSAADVSR               | 112d | 18 |
| FBgn0011693 | 780.43  | 52  | 2 | VYPLEIKPQWTGK          | 112d | 18 |
| FBgn0011693 | 648.85  | 42  | 1 | AAHPTQSVMIIK           | 122d | 18 |
| FBgn0011693 | 446.89  | 43  | 1 | AGIINFTR               | 122d | 18 |
| FBgn0011693 | 495.45  | 52  | 1 | CILNVLEK               | 122d | 18 |
| FBgn0011693 | 1149.38 | 79  | 2 | FVTVCPGATMTDMFTNFTEK   | 122d | 18 |
| FBgn0011693 | 736.48  | 43  | 1 | IIFPETSDETYR           | 122d | 18 |
| FBgn0011693 | 1218.05 | 45  | 1 | TFGNIDIVVNVAGIFNDKDVQR | 122d | 18 |
| FBgn0011693 | 780.66  | 44  | 2 | VYPLEIKPQWTGK          | 122d | 18 |
| FBgn0011693 | 649.04  | 52  | 2 | AAHPTQSVMIIK           | 132d | 18 |
| FBgn0011693 | 495.41  | 37  | 1 | CILNVLEK               | 132d | 18 |
| FBgn0011693 | 605.87  | 72  | 3 | GVEATYEEIAK            | 132d | 18 |
| FBgn0011693 | 736.04  | 66  | 4 | IIFPETSDETYR           | 132d | 18 |
| FBgn0011693 | 764.92  | 84  | 1 | NAVVTGGAGGIGLQVSK      | 132d | 18 |
| FBgn0011693 | 780.48  | 51  | 3 | VYPLEIKPQWTGK          | 132d | 18 |
| FBgn0011693 | 648.91  | 34  | 1 | AAHPTQSVMIIK           | 142d | 18 |
| FBgn0011693 | 1149.29 | 54  | 1 | FVTVCPGATMTDMFTNFTEK   | 142d | 18 |

|             |         |     |   |                        |      |    |
|-------------|---------|-----|---|------------------------|------|----|
| FBgn0011693 | 736.08  | 53  | 1 | IIFPETSDETYR           | 142d | 18 |
| FBgn0011693 | 417.95  | 39  | 1 | QSAADVSR               | 142d | 18 |
| FBgn0011693 | 779.99  | 52  | 3 | VYPLEIKPQWTGK          | 142d | 18 |
| FBgn0011693 | 648.56  | 45  | 3 | AAHPTQSVMIIK           | 2d   | 28 |
| FBgn0011693 | 446.53  | 50  | 1 | AGIINFTR               | 2d   | 28 |
| FBgn0011693 | 647.19  | 48  | 1 | DKNGAVYVIEGK           | 2d   | 28 |
| FBgn0011693 | 1149.72 | 60  | 1 | FVTVCPGATMTDMFTNFTEK   | 2d   | 28 |
| FBgn0011693 | 605.99  | 57  | 4 | GVEATYEEIAK            | 2d   | 28 |
| FBgn0011693 | 736.58  | 57  | 4 | IIFPETSDETYR           | 2d   | 28 |
| FBgn0011693 | 764.81  | 97  | 3 | NAVVTGGAGGIGLQVSK      | 2d   | 28 |
| FBgn0011693 | 1138.71 | 36  | 1 | TLLVNLGGIINSTLSALPYMGK | 2d   | 28 |
| FBgn0011693 | 780.4   | 45  | 3 | VYPLEIKPQWTGK          | 2d   | 28 |
| FBgn0011693 | 432.92  | 34  | 1 | AAHPTQSVMIIK           | 12d  | 28 |
| FBgn0011693 | 446.7   | 54  | 2 | AGIINFTR               | 12d  | 28 |
| FBgn0011693 | 1149.38 | 68  | 1 | FVTVCPGATMTDMFTNFTEK   | 12d  | 28 |
| FBgn0011693 | 605.86  | 64  | 3 | GVEATYEEIAK            | 12d  | 28 |
| FBgn0011693 | 736.13  | 34  | 1 | IIFPETSDETYR           | 12d  | 28 |
| FBgn0011693 | 764.84  | 120 | 3 | NAVVTGGAGGIGLQVSK      | 12d  | 28 |
| FBgn0011693 | 858.6   | 61  | 2 | RVYPLEIKPQWTGK         | 12d  | 28 |
| FBgn0011693 | 780.27  | 43  | 2 | VYPLEIKPQWTGK          | 12d  | 28 |
| FBgn0011693 | 605.6   | 43  | 1 | GVEATYEEIAK            | 22d  | 28 |
| FBgn0011693 | 736.52  | 56  | 1 | IIFPETSDETYR           | 22d  | 28 |
| FBgn0011693 | 669.89  | 58  | 1 | KGVEATYEEIAK           | 22d  | 28 |
| FBgn0011693 | 780.62  | 40  | 2 | VYPLEIKPQWTGK          | 22d  | 28 |
| FBgn0011693 | 648.87  | 57  | 1 | AAHPTQSVMIIK           | 32d  | 28 |
| FBgn0011693 | 605.61  | 49  | 3 | GVEATYEEIAK            | 32d  | 28 |
| FBgn0011693 | 736.14  | 60  | 5 | IIFPETSDETYR           | 32d  | 28 |
| FBgn0011693 | 764.68  | 126 | 3 | NAVVTGGAGGIGLQVSK      | 32d  | 28 |
| FBgn0011693 | 780.66  | 45  | 1 | VYPLEIKPQWTGK          | 32d  | 28 |
| FBgn0011693 | 648.65  | 48  | 3 | AAHPTQSVMIIK           | 36d  | 28 |
| FBgn0011693 | 1149.64 | 63  | 2 | FVTVCPGATMTDMFTNFTEK   | 36d  | 28 |
| FBgn0011693 | 605.86  | 68  | 4 | GVEATYEEIAK            | 36d  | 28 |

|             |         |     |   |                        |     |    |
|-------------|---------|-----|---|------------------------|-----|----|
| FBgn0011693 | 765.08  | 104 | 3 | NAVVTGGAGGIGLQVSK      | 36d | 28 |
| FBgn0011693 | 780.23  | 45  | 3 | VYPLEIKPQWTGK          | 36d | 28 |
| FBgn0011693 | 648.86  | 50  | 2 | AAHPTQSVMIK            | 42d | 28 |
| FBgn0011693 | 1149.62 | 73  | 2 | FVTVCPGATMTDMFTNFTEK   | 42d | 28 |
| FBgn0011693 | 605.99  | 67  | 4 | GVEATYEEIAK            | 42d | 28 |
| FBgn0011693 | 736.58  | 73  | 5 | IIFPETSDETYR           | 42d | 28 |
| FBgn0011693 | 764.69  | 112 | 3 | NAVVTGGAGGIGLQVSK      | 42d | 28 |
| FBgn0011693 | 1138.84 | 48  | 2 | TLLVNLGGIINSTLSALPYMGK | 42d | 28 |
| FBgn0011693 | 780.25  | 48  | 3 | VYPLEIKPQWTGK          | 42d | 28 |
| FBgn0011693 | 648.84  | 42  | 3 | AAHPTQSVMIK            | 46d | 28 |
| FBgn0011693 | 1149.36 | 41  | 1 | FVTVCPGATMTDMFTNFTEK   | 46d | 28 |
| FBgn0011693 | 605.68  | 50  | 3 | GVEATYEEIAK            | 46d | 28 |
| FBgn0011693 | 736.33  | 57  | 3 | IIFPETSDETYR           | 46d | 28 |
| FBgn0011693 | 764.76  | 49  | 1 | NAVVTGGAGGIGLQVSK      | 46d | 28 |
| FBgn0011693 | 780.22  | 39  | 2 | VYPLEIKPQWTGK          | 46d | 28 |
| FBgn0011693 | 648.59  | 50  | 3 | AAHPTQSVMIK            | 50d | 28 |
| FBgn0011693 | 1149.67 | 95  | 2 | FVTVCPGATMTDMFTNFTEK   | 50d | 28 |
| FBgn0011693 | 605.75  | 45  | 2 | GVEATYEEIAK            | 50d | 28 |
| FBgn0011693 | 736.49  | 61  | 3 | IIFPETSDETYR           | 50d | 28 |
| FBgn0011693 | 765.12  | 106 | 3 | NAVVTGGAGGIGLQVSK      | 50d | 28 |
| FBgn0011693 | 780.61  | 59  | 2 | VYPLEIKPQWTGK          | 50d | 28 |
| FBgn0011693 | 605.7   | 51  | 1 | GVEATYEEIAK            | 52d | 28 |
| FBgn0011693 | 736.4   | 60  | 1 | IIFPETSDETYR           | 52d | 28 |
| FBgn0011693 | 780.37  | 53  | 3 | VYPLEIKPQWTGK          | 52d | 28 |
| FBgn0011693 | 1149.66 | 53  | 2 | FVTVCPGATMTDMFTNFTEK   | 56d | 28 |
| FBgn0011693 | 736.46  | 61  | 2 | IIFPETSDETYR           | 56d | 28 |
| FBgn0011695 | 669.12  | 53  | 2 | YDNIDVDEILK            | 2d  | 18 |
| FBgn0011695 | 725.19  | 61  | 3 | YIENKPEEWK             | 2d  | 18 |
| FBgn0011695 | 669.18  | 53  | 4 | YDNIDVDEILK            | 22d | 18 |
| FBgn0011695 | 725.27  | 51  | 3 | YIENKPEEWK             | 22d | 18 |
| FBgn0011695 | 669.23  | 56  | 2 | YDNIDVDEILK            | 42d | 18 |
| FBgn0011695 | 725.18  | 52  | 3 | YIENKPEEWK             | 42d | 18 |



|             |        |    |   |               |      |    |
|-------------|--------|----|---|---------------|------|----|
| FBgn0011695 | 669.19 | 53 | 1 | YDNIDVDEILK   | 62d  | 18 |
| FBgn0011695 | 725.2  | 58 | 3 | YIENKPEEWK    | 62d  | 18 |
| FBgn0011695 | 668.83 | 51 | 1 | YDNIDVDEILK   | 82d  | 18 |
| FBgn0011695 | 725.36 | 41 | 1 | YIENKPEEWK    | 82d  | 18 |
| FBgn0011695 | 669.19 | 53 | 5 | YDNIDVDEILK   | 102d | 18 |
| FBgn0011695 | 725.5  | 55 | 2 | YIENKPEEWK    | 102d | 18 |
| FBgn0011695 | 669.1  | 50 | 2 | YDNIDVDEILK   | 112d | 18 |
| FBgn0011695 | 669.29 | 52 | 2 | YDNIDVDEILK   | 122d | 18 |
| FBgn0011695 | 725.51 | 45 | 1 | YIENKPEEWK    | 122d | 18 |
| FBgn0011695 | 725.19 | 46 | 1 | YIENKPEEWK    | 132d | 18 |
| FBgn0011695 | 669.55 | 53 | 1 | YDNIDVDEILK   | 142d | 18 |
| FBgn0011695 | 669.01 | 51 | 3 | YDNIDVDEILK   | 2d   | 28 |
| FBgn0011695 | 483.98 | 47 | 3 | YIENKPEEWK    | 2d   | 28 |
| FBgn0011695 | 669.23 | 52 | 3 | YDNIDVDEILK   | 12d  | 28 |
| FBgn0011695 | 725.44 | 46 | 1 | YIENKPEEWK    | 12d  | 28 |
| FBgn0011695 | 669.3  | 53 | 1 | YDNIDVDEILK   | 22d  | 28 |
| FBgn0011695 | 725.55 | 51 | 2 | YIENKPEEWK    | 22d  | 28 |
| FBgn0011695 | 669.57 | 53 | 4 | YDNIDVDEILK   | 32d  | 28 |
| FBgn0011695 | 725.56 | 52 | 3 | YIENKPEEWK    | 32d  | 28 |
| FBgn0011695 | 668.96 | 53 | 2 | YDNIDVDEILK   | 36d  | 28 |
| FBgn0011695 | 725.42 | 59 | 3 | YIENKPEEWK    | 36d  | 28 |
| FBgn0011695 | 669.23 | 41 | 3 | YDNIDVDEILK   | 42d  | 28 |
| FBgn0011695 | 725.45 | 52 | 3 | YIENKPEEWK    | 42d  | 28 |
| FBgn0011695 | 669.38 | 37 | 1 | YDNIDVDEILK   | 46d  | 28 |
| FBgn0011695 | 725.27 | 52 | 2 | YIENKPEEWK    | 46d  | 28 |
| FBgn0011695 | 669.2  | 51 | 2 | YDNIDVDEILK   | 50d  | 28 |
| FBgn0011695 | 725.3  | 52 | 2 | YIENKPEEWK    | 50d  | 28 |
| FBgn0011695 | 669.45 | 48 | 2 | YDNIDVDEILK   | 52d  | 28 |
| FBgn0011695 | 725.45 | 52 | 3 | YIENKPEEWK    | 52d  | 28 |
| FBgn0011695 | 669.3  | 52 | 1 | YDNIDVDEILK   | 56d  | 28 |
| FBgn0011712 | 801.01 | 42 | 1 | SIQHVEQAADYFK | 2d   | 18 |
| FBgn0011712 | 800.67 | 82 | 2 | SIQHVEQAADYFK | 22d  | 18 |

|             |        |    |   |               |      |    |
|-------------|--------|----|---|---------------|------|----|
| FBgn0011712 | 592.72 | 52 | 1 | GFLGSLFGGSNK  | 62d  | 18 |
| FBgn0011712 | 801.08 | 50 | 1 | SIQHYEQAADYFK | 62d  | 18 |
| FBgn0011712 | 800.89 | 60 | 2 | SIQHYEQAADYFK | 82d  | 18 |
| FBgn0011712 | 592.94 | 62 | 1 | GFLGSLFGGSNK  | 122d | 18 |
| FBgn0011712 | 592.69 | 47 | 1 | GFLGSLFGGSNK  | 132d | 18 |
| FBgn0011712 | 737.85 | 64 | 1 | YAQQYPAFQDSR  | 132d | 18 |
| FBgn0011712 | 800.54 | 50 | 1 | SIQHYEQAADYFK | 2d   | 28 |
| FBgn0011712 | 800.76 | 50 | 2 | SIQHYEQAADYFK | 32d  | 28 |
| FBgn0011712 | 800.55 | 50 | 1 | SIQHYEQAADYFK | 36d  | 28 |
| FBgn0011712 | 800.87 | 65 | 3 | SIQHYEQAADYFK | 42d  | 28 |
| FBgn0011712 | 800.9  | 49 | 1 | SIQHYEQAADYFK | 46d  | 28 |
| FBgn0011726 | 807.22 | 50 | 2 | NAEYDQFLEDIQK | 2d   | 18 |
| FBgn0011726 | 677.79 | 69 | 2 | YIQATDLSEASR  | 2d   | 18 |
| FBgn0011726 | 807.55 | 51 | 2 | NAEYDQFLEDIQK | 22d  | 18 |
| FBgn0011726 | 678.06 | 69 | 1 | YIQATDLSEASR  | 22d  | 18 |
| FBgn0011726 | 807.26 | 72 | 1 | NAEYDQFLEDIQK | 42d  | 18 |
| FBgn0011726 | 807.21 | 78 | 1 | NAEYDQFLEDIQK | 62d  | 18 |
| FBgn0011726 | 677.86 | 62 | 3 | YIQATDLSEASR  | 62d  | 18 |
| FBgn0011726 | 807.22 | 81 | 2 | NAEYDQFLEDIQK | 82d  | 18 |
| FBgn0011726 | 677.96 | 73 | 2 | YIQATDLSEASR  | 82d  | 18 |
| FBgn0011726 | 807.62 | 76 | 1 | NAEYDQFLEDIQK | 102d | 18 |
| FBgn0011726 | 807.54 | 50 | 1 | NAEYDQFLEDIQK | 112d | 18 |
| FBgn0011726 | 807.34 | 82 | 3 | NAEYDQFLEDIQK | 122d | 18 |
| FBgn0011726 | 677.62 | 60 | 1 | YIQATDLSEASR  | 132d | 18 |
| FBgn0011726 | 807.42 | 94 | 3 | NAEYDQFLEDIQK | 2d   | 28 |
| FBgn0011726 | 677.66 | 77 | 6 | YIQATDLSEASR  | 2d   | 28 |
| FBgn0011726 | 807.33 | 50 | 1 | NAEYDQFLEDIQK | 12d  | 28 |
| FBgn0011726 | 677.78 | 66 | 1 | YIQATDLSEASR  | 12d  | 28 |
| FBgn0011726 | 807.55 | 71 | 2 | NAEYDQFLEDIQK | 32d  | 28 |
| FBgn0011726 | 677.56 | 66 | 2 | YIQATDLSEASR  | 32d  | 28 |
| FBgn0011726 | 807.21 | 82 | 3 | NAEYDQFLEDIQK | 36d  | 28 |
| FBgn0011726 | 677.76 | 36 | 1 | YIQATDLSEASR  | 36d  | 28 |

|             |         |    |   |                            |      |    |
|-------------|---------|----|---|----------------------------|------|----|
| FBgn0011726 | 807.6   | 58 | 2 | NAEYDQFLEDIQK              | 42d  | 28 |
| FBgn0011726 | 807.16  | 48 | 3 | NAEYDQFLEDIQK              | 46d  | 28 |
| FBgn0011726 | 807.43  | 68 | 1 | NAEYDQFLEDIQK              | 50d  | 28 |
| FBgn0011726 | 677.79  | 59 | 1 | YIQATDLSEASR               | 50d  | 28 |
| FBgn0011726 | 807.34  | 66 | 1 | NAEYDQFLEDIQK              | 52d  | 28 |
| FBgn0011726 | 807.57  | 63 | 3 | NAEYDQFLEDIQK              | 56d  | 28 |
| FBgn0011768 | 1023.51 | 54 | 1 | DLLVDEFITHELPLSQINEAFDLMHK | 2d   | 18 |
| FBgn0011768 | 869.08  | 57 | 1 | IYGIDINPDKFELAK            | 2d   | 18 |
| FBgn0011768 | 869.21  | 46 | 1 | IYGIDINPDKFELAK            | 12d  | 28 |
| FBgn0011770 | 996     | 52 | 1 | AVEIPYPEGETSDVVS AVK       | 42d  | 18 |
| FBgn0011770 | 996.11  | 35 | 1 | AVEIPYPEGETSDVVS AVK       | 102d | 18 |
| FBgn0011770 | 996.06  | 59 | 1 | AVEIPYPEGETSDVVS AVK       | 2d   | 28 |
| FBgn0011787 | 1284.14 | 53 | 1 | LDSIVNNIAALNLLEVAELSTLLK   | 2d   | 28 |
| FBgn0011787 | 936.56  | 61 | 3 | LNLPETAFAPQFAAGPAR         | 2d   | 28 |
| FBgn0011826 | 755.77  | 38 | 1 | GLTPTGALPLGALSGGK          | 2d   | 18 |
| FBgn0011826 | 756.02  | 44 | 2 | GLTPTGALPLGALSGGK          | 42d  | 18 |
| FBgn0011826 | 756.13  | 47 | 2 | GLTPTGALPLGALSGGK          | 102d | 18 |
| FBgn0011826 | 1014.21 | 53 | 1 | FKEPPAFGPMCDLLWSDPLEDFGNEK | 112d | 18 |
| FBgn0011826 | 756.05  | 40 | 1 | GLTPTGALPLGALSGGK          | 142d | 18 |
| FBgn0011826 | 755.61  | 50 | 2 | GLTPTGALPLGALSGGK          | 2d   | 28 |
| FBgn0011826 | 756.13  | 47 | 3 | GLTPTGALPLGALSGGK          | 12d  | 28 |
| FBgn0011826 | 756.18  | 37 | 1 | GLTPTGALPLGALSGGK          | 22d  | 28 |
| FBgn0011826 | 755.65  | 62 | 2 | GLTPTGALPLGALSGGK          | 32d  | 28 |
| FBgn0011826 | 756.07  | 41 | 1 | GLTPTGALPLGALSGGK          | 50d  | 28 |
| FBgn0011826 | 755.94  | 51 | 1 | GLTPTGALPLGALSGGK          | 52d  | 28 |
| FBgn0012034 | 945.3   | 50 | 1 | FYQESLDNPAEFWSR            | 122d | 18 |
| FBgn0012261 | 679.74  | 60 | 3 | AIELNENGAIWK               | 22d  | 28 |
| FBgn0013279 | 846.88  | 45 | 1 | STAGDTHLGGEDFDNR           | 42d  | 18 |
| FBgn0013279 | 846.64  | 57 | 1 | STAGDTHLGGEDFDNR           | 102d | 18 |
| FBgn0013279 | 846.69  | 59 | 1 | STAGDTHLGGEDFDNR           | 46d  | 28 |
| FBgn0013325 | 788.17  | 81 | 3 | VLEQLTGQQPVFSK             | 2d   | 18 |
| FBgn0013325 | 787.93  | 56 | 1 | VLEQLTGQQPVFSK             | 82d  | 18 |

|             |         |    |   |                             |      |    |
|-------------|---------|----|---|-----------------------------|------|----|
| FBgn0013325 | 787.88  | 47 | 1 | VLEQLTGQQPVFSK              | 122d | 18 |
| FBgn0013325 | 787.89  | 65 | 3 | VLEQLTGQQPVFSK              | 2d   | 28 |
| FBgn0013325 | 787.86  | 47 | 1 | VLEQLTGQQPVFSK              | 36d  | 28 |
| FBgn0013334 | 1446.08 | 56 | 2 | APPAGVDFEFSYDTAYPTAIAIMAEDK | 2d   | 18 |
| FBgn0013334 | 946.36  | 53 | 3 | GQGGVGNGAAPWIGHANEAK        | 2d   | 18 |
| FBgn0013334 | 604.7   | 51 | 3 | IITEENFWR                   | 2d   | 18 |
| FBgn0013334 | 701.1   | 63 | 3 | IKEEILGLSQDR                | 2d   | 18 |
| FBgn0013334 | 604.8   | 46 | 2 | IITEENFWR                   | 22d  | 18 |
| FBgn0013334 | 701.32  | 65 | 3 | IKEEILGLSQDR                | 22d  | 18 |
| FBgn0013334 | 584.38  | 48 | 1 | DNTILDSFNK                  | 42d  | 18 |
| FBgn0013334 | 631.44  | 44 | 1 | GQGGVGNGAAPWIGHANEAK        | 42d  | 18 |
| FBgn0013334 | 641.26  | 43 | 1 | HFGSFLSSAISK                | 42d  | 18 |
| FBgn0013334 | 604.66  | 48 | 3 | IITEENFWR                   | 42d  | 18 |
| FBgn0013334 | 367.09  | 41 | 1 | FELVPK                      | 62d  | 18 |
| FBgn0013334 | 604.9   | 52 | 1 | IITEENFWR                   | 62d  | 18 |
| FBgn0013334 | 701.27  | 62 | 1 | IKEEILGLSQDR                | 62d  | 18 |
| FBgn0013334 | 584.21  | 46 | 1 | DNTILDSFNK                  | 82d  | 18 |
| FBgn0013334 | 367.26  | 43 | 1 | FELVPK                      | 82d  | 18 |
| FBgn0013334 | 604.77  | 44 | 1 | IITEENFWR                   | 82d  | 18 |
| FBgn0013334 | 701.43  | 66 | 3 | IKEEILGLSQDR                | 82d  | 18 |
| FBgn0013334 | 584.21  | 43 | 2 | DNTILDSFNK                  | 102d | 18 |
| FBgn0013334 | 604.69  | 56 | 2 | IITEENFWR                   | 102d | 18 |
| FBgn0013334 | 584.43  | 45 | 1 | DNTILDSFNK                  | 112d | 18 |
| FBgn0013334 | 605.04  | 49 | 2 | IITEENFWR                   | 112d | 18 |
| FBgn0013334 | 604.84  | 56 | 2 | IITEENFWR                   | 122d | 18 |
| FBgn0013334 | 604.97  | 52 | 1 | IITEENFWR                   | 132d | 18 |
| FBgn0013334 | 584.4   | 43 | 2 | DNTILDSFNK                  | 142d | 18 |
| FBgn0013334 | 641.47  | 49 | 3 | HFGSFLSSAISK                | 142d | 18 |
| FBgn0013334 | 604.61  | 56 | 2 | IITEENFWR                   | 142d | 18 |
| FBgn0013334 | 584.03  | 56 | 2 | DNTILDSFNK                  | 2d   | 28 |
| FBgn0013334 | 946.37  | 68 | 3 | GQGGVGNGAAPWIGHANEAK        | 2d   | 28 |
| FBgn0013334 | 604.82  | 49 | 3 | IITEENFWR                   | 2d   | 28 |

|             |         |    |   |                                  |     |    |
|-------------|---------|----|---|----------------------------------|-----|----|
| FBgn0013334 | 701.35  | 65 | 3 | IKEEILGLSQDR                     | 2d  | 28 |
| FBgn0013334 | 403.51  | 40 | 1 | SGWLGSAK                         | 2d  | 28 |
| FBgn0013334 | 1030.91 | 51 | 1 | YISATEGADSHPASGGGTPTGDEGQIGQVTTK | 2d  | 28 |
| FBgn0013334 | 584.11  | 45 | 1 | DNTILDSFNK                       | 12d | 28 |
| FBgn0013334 | 1007.15 | 44 | 1 | DNTILDSFNKEQEAFIK                | 12d | 28 |
| FBgn0013334 | 946.59  | 87 | 2 | GQGGVGNGAAPWIGHANEAK             | 12d | 28 |
| FBgn0013334 | 605.02  | 51 | 3 | IITEENFWR                        | 12d | 28 |
| FBgn0013334 | 701.34  | 45 | 2 | IKEEILGLSQDR                     | 12d | 28 |
| FBgn0013334 | 1030.94 | 64 | 3 | YISATEGADSHPASGGGTPTGDEGQIGQVTTK | 12d | 28 |
| FBgn0013334 | 604.61  | 57 | 2 | IITEENFWR                        | 22d | 28 |
| FBgn0013334 | 641.32  | 34 | 1 | HFGSFLSSAISK                     | 32d | 28 |
| FBgn0013334 | 604.77  | 46 | 2 | IITEENFWR                        | 32d | 28 |
| FBgn0013334 | 701.28  | 58 | 3 | IKEEILGLSQDR                     | 32d | 28 |
| FBgn0013334 | 403.72  | 38 | 2 | SGWLGSAK                         | 32d | 28 |
| FBgn0013334 | 604.7   | 49 | 3 | IITEENFWR                        | 36d | 28 |
| FBgn0013334 | 701.54  | 68 | 2 | IKEEILGLSQDR                     | 36d | 28 |
| FBgn0013334 | 584.08  | 47 | 2 | DNTILDSFNK                       | 42d | 28 |
| FBgn0013334 | 641.16  | 46 | 2 | HFGSFLSSAISK                     | 42d | 28 |
| FBgn0013334 | 604.57  | 56 | 3 | IITEENFWR                        | 42d | 28 |
| FBgn0013334 | 701.19  | 68 | 2 | IKEEILGLSQDR                     | 42d | 28 |
| FBgn0013334 | 604.4   | 53 | 3 | IITEENFWR                        | 46d | 28 |
| FBgn0013334 | 701.64  | 60 | 3 | IKEEILGLSQDR                     | 46d | 28 |
| FBgn0013334 | 580.76  | 37 | 1 | EEILGLSQDR                       | 50d | 28 |
| FBgn0013334 | 604.79  | 58 | 2 | IITEENFWR                        | 50d | 28 |
| FBgn0013334 | 701.22  | 72 | 3 | IKEEILGLSQDR                     | 50d | 28 |
| FBgn0013334 | 641.56  | 52 | 3 | HFGSFLSSAISK                     | 52d | 28 |
| FBgn0013334 | 604.7   | 57 | 3 | IITEENFWR                        | 52d | 28 |
| FBgn0013334 | 1030.83 | 39 | 1 | YISATEGADSHPASGGGTPTGDEGQIGQVTTK | 52d | 28 |
| FBgn0013334 | 584.19  | 51 | 1 | DNTILDSFNK                       | 56d | 28 |
| FBgn0013334 | 604.78  | 46 | 2 | IITEENFWR                        | 56d | 28 |
| FBgn0013342 | 889.46  | 84 | 1 | ADALQQGASQFEQQAGK                | 2d  | 18 |
| FBgn0013342 | 889.39  | 62 | 1 | ADALQQGASQFEQQAGK                | 42d | 18 |

|             |        |    |   |                             |      |    |
|-------------|--------|----|---|-----------------------------|------|----|
| FBgn0013342 | 889.29 | 84 | 2 | ADALQQGASQFEQQAGK           | 102d | 18 |
| FBgn0013342 | 889.18 | 86 | 1 | ADALQQGASQFEQQAGK           | 112d | 18 |
| FBgn0013342 | 889.5  | 75 | 2 | ADALQQGASQFEQQAGK           | 132d | 18 |
| FBgn0013342 | 889.46 | 39 | 1 | ADALQQGASQFEQQAGK           | 142d | 18 |
| FBgn0013342 | 889.33 | 80 | 2 | ADALQQGASQFEQQAGK           | 2d   | 28 |
| FBgn0013342 | 889.46 | 75 | 3 | ADALQQGASQFEQQAGK           | 12d  | 28 |
| FBgn0013342 | 889.31 | 84 | 2 | ADALQQGASQFEQQAGK           | 32d  | 28 |
| FBgn0013342 | 889.29 | 83 | 2 | ADALQQGASQFEQQAGK           | 36d  | 28 |
| FBgn0013342 | 889.3  | 97 | 3 | ADALQQGASQFEQQAGK           | 46d  | 28 |
| FBgn0013342 | 889.3  | 82 | 3 | ADALQQGASQFEQQAGK           | 50d  | 28 |
| FBgn0013342 | 889.37 | 84 | 3 | ADALQQGASQFEQQAGK           | 52d  | 28 |
| FBgn0013342 | 889.42 | 76 | 1 | ADALQQGASQFEQQAGK           | 56d  | 28 |
| FBgn0013348 | 577.16 | 52 | 1 | NAFNAFDPEK                  | 2d   | 18 |
| FBgn0013467 | 972.23 | 39 | 1 | KVAEELDIDLTDPELNK           | 2d   | 18 |
| FBgn0013467 | 752.3  | 62 | 1 | DAPEDEDIQEITK               | 42d  | 18 |
| FBgn0013467 | 972.13 | 36 | 1 | KVAEELDIDLTDPELNK           | 42d  | 18 |
| FBgn0013467 | 908.05 | 54 | 1 | VAEELDIDLTDPELNK            | 42d  | 18 |
| FBgn0013467 | 752.52 | 82 | 2 | DAPEDEDIQEITK               | 62d  | 18 |
| FBgn0013467 | 752.16 | 50 | 1 | DAPEDEDIQEITK               | 82d  | 18 |
| FBgn0013467 | 816.46 | 39 | 1 | DAPEDEDIQEITKK              | 82d  | 18 |
| FBgn0013467 | 751.11 | 81 | 1 | DAPEDEDIQEITK               | 102d | 18 |
| FBgn0013467 | 752.54 | 92 | 1 | DAPEDEDIQEITK               | 112d | 18 |
| FBgn0013467 | 751.19 | 84 | 2 | DAPEDEDIQEITK               | 122d | 18 |
| FBgn0013467 | 752.46 | 40 | 1 | DAPEDEDIQEITK               | 132d | 18 |
| FBgn0013467 | 751.12 | 83 | 1 | DAPEDEDIQEITK               | 142d | 18 |
| FBgn0013467 | 752.21 | 62 | 2 | DAPEDEDIQEITK               | 2d   | 28 |
| FBgn0013467 | 1215.4 | 82 | 1 | TATNNGSAAGAAPSAAAAEAAASAEPK | 2d   | 28 |
| FBgn0013467 | 752.18 | 50 | 1 | DAPEDEDIQEITK               | 32d  | 28 |
| FBgn0013467 | 972.04 | 37 | 1 | KVAEELDIDLTDPELNK           | 36d  | 28 |
| FBgn0013467 | 752.16 | 92 | 3 | DAPEDEDIQEITK               | 42d  | 28 |
| FBgn0013467 | 752.09 | 74 | 3 | DAPEDEDIQEITK               | 50d  | 28 |
| FBgn0013467 | 752.18 | 82 | 2 | DAPEDEDIQEITK               | 52d  | 28 |

|             |         |    |   |                             |      |    |
|-------------|---------|----|---|-----------------------------|------|----|
| FBgn0013675 | 1046.3  | 43 | 1 | ILVTAADVIHSWTVPALGVK        | 12d  | 28 |
| FBgn0013675 | 697.8   | 34 | 1 | ILVTAADVIHSWTVPALGVK        | 46d  | 28 |
| FBgn0013733 | 757.45  | 40 | 1 | DLEETLSCQEPPAAQPQDIK        | 2d   | 18 |
| FBgn0013733 | 992.83  | 39 | 1 | TLVQSQGVQDALDSLVGWVNQAEDKFK | 12d  | 28 |
| FBgn0013733 | 666.24  | 49 | 2 | QSLLDTTKAQVK                | 50d  | 28 |
| FBgn0013749 | 1162.7  | 44 | 1 | LGEIVTTIPTIGFNVETVEYK       | 2d   | 18 |
| FBgn0013749 | 775.48  | 82 | 3 | LGEIVTTIPTIGFNVETVEYK       | 42d  | 18 |
| FBgn0013749 | 1162.78 | 41 | 2 | LGEIVTTIPTIGFNVETVEYK       | 12d  | 28 |
| FBgn0013749 | 1162.74 | 50 | 1 | LGEIVTTIPTIGFNVETVEYK       | 42d  | 28 |
| FBgn0013749 | 1162.53 | 35 | 1 | LGEIVTTIPTIGFNVETVEYK       | 56d  | 28 |
| FBgn0013763 | 969.58  | 52 | 2 | NPEVADYAAPIYELSER           | 2d   | 18 |
| FBgn0013763 | 969.37  | 58 | 1 | NPEVADYAAPIYELSER           | 42d  | 18 |
| FBgn0013763 | 701.37  | 44 | 1 | LTDDSGDTGVPPVK              | 2d   | 28 |
| FBgn0013763 | 969.39  | 81 | 2 | NPEVADYAAPIYELSER           | 2d   | 28 |
| FBgn0013763 | 969.4   | 73 | 2 | NPEVADYAAPIYELSER           | 12d  | 28 |
| FBgn0013763 | 969.45  | 42 | 1 | NPEVADYAAPIYELSER           | 32d  | 28 |
| FBgn0013763 | 969.46  | 50 | 1 | NPEVADYAAPIYELSER           | 36d  | 28 |
| FBgn0013763 | 969.26  | 44 | 1 | NPEVADYAAPIYELSER           | 42d  | 28 |
| FBgn0013763 | 969.5   | 43 | 1 | NPEVADYAAPIYELSER           | 46d  | 28 |
| FBgn0013763 | 969.43  | 57 | 3 | NPEVADYAAPIYELSER           | 56d  | 28 |
| FBgn0013770 | 923.68  | 58 | 2 | SYPYEAIDDSCHF NK            | 2d   | 18 |
| FBgn0013770 | 923.75  | 49 | 1 | SYPYEAIDDSCHF NK            | 52d  | 28 |
| FBgn0013811 | 999.28  | 34 | 1 | VLIYAMPVIFFRPVGLVDVVEGSR YR | 82d  | 18 |
| FBgn0013812 | 489.65  | 35 | 1 | SGSLFEVNIPEFK               | 142d | 18 |
| FBgn0013954 | 843.9   | 35 | 1 | GVQVVPIANGDGSTFPK           | 2d   | 18 |
| FBgn0013954 | 843.51  | 41 | 1 | GVQVVPIAPGDGSTYPK           | 2d   | 18 |
| FBgn0013954 | 843.53  | 36 | 1 | GVQVVPIAPGDGSTYPK           | 62d  | 18 |
| FBgn0013954 | 843.19  | 43 | 1 | GVQVVPIAPGDGSTYPK           | 82d  | 18 |
| FBgn0013954 | 843.59  | 38 | 1 | GVQVVPIANGDGSTFPK           | 102d | 18 |
| FBgn0013954 | 754.48  | 43 | 1 | VTVHYTGTLDDGTK              | 122d | 18 |
| FBgn0013954 | 754.22  | 70 | 3 | VTVHYTGTLDDGTK              | 2d   | 28 |
| FBgn0013954 | 844.12  | 52 | 1 | GVQVVPIANGDGSTFPK           | 12d  | 28 |

|             |         |    |   |                      |      |    |
|-------------|---------|----|---|----------------------|------|----|
| FBgn0013954 | 843.34  | 55 | 2 | GVQVVPIAPGDGSTYPK    | 12d  | 28 |
| FBgn0013954 | 843.24  | 35 | 1 | GVQVVPIAPGDGSTYPK    | 22d  | 28 |
| FBgn0013954 | 843.31  | 52 | 2 | GVQVVPIANGDGSTFFPK   | 32d  | 28 |
| FBgn0013954 | 843.64  | 64 | 1 | GVQVVPIAPGDGSTYPK    | 32d  | 28 |
| FBgn0013954 | 701.81  | 43 | 2 | LICSPDYAYGSR         | 32d  | 28 |
| FBgn0013954 | 843.77  | 43 | 2 | GVQVVPIANGDGSTFFPK   | 36d  | 28 |
| FBgn0013954 | 843.69  | 55 | 2 | GVQVVPIANGDGSTFFPK   | 42d  | 28 |
| FBgn0013954 | 843.73  | 42 | 2 | GVQVVPIANGDGSTFFPK   | 46d  | 28 |
| FBgn0013954 | 843.98  | 42 | 2 | GVQVVPIANGDGSTFFPK   | 50d  | 28 |
| FBgn0013954 | 843.56  | 37 | 1 | GVQVVPIAPGDGSTYPK    | 50d  | 28 |
| FBgn0013954 | 754.38  | 61 | 1 | VTVHYTGTLDDGTK       | 50d  | 28 |
| FBgn0013954 | 843.97  | 46 | 3 | GVQVVPIANGDGSTFFPK   | 52d  | 28 |
| FBgn0013954 | 754.37  | 55 | 2 | VTVHYTGTLDDGTK       | 52d  | 28 |
| FBgn0013972 | 632     | 35 | 1 | NSIEEANSVTK          | 82d  | 18 |
| FBgn0013988 | 769.68  | 40 | 2 | WFFGDQPIAFGPR        | 122d | 18 |
| FBgn0013998 | 676.08  | 76 | 2 | LFAEAEIEEEKR         | 2d   | 18 |
| FBgn0013998 | 646.53  | 48 | 1 | NFSGAELEGLVR         | 62d  | 18 |
| FBgn0013998 | 676.35  | 61 | 1 | LFAEAEIEEEKR         | 2d   | 28 |
| FBgn0014002 | 719.06  | 76 | 3 | DLTSVADAEQFLK        | 2d   | 18 |
| FBgn0014002 | 1116.21 | 57 | 2 | FAQVQSLPLIVDFNHESASK | 2d   | 18 |
| FBgn0014002 | 754.9   | 35 | 1 | SVFEGELNEENLK        | 2d   | 18 |
| FBgn0014002 | 819.05  | 68 | 2 | SVFEGELNEENLKK       | 2d   | 18 |
| FBgn0014002 | 1028.75 | 78 | 1 | YKPESDDLSAETIEAFLK   | 2d   | 18 |
| FBgn0014002 | 719.53  | 74 | 2 | DLTSVADAEQFLK        | 42d  | 18 |
| FBgn0014002 | 1028.94 | 83 | 3 | YKPESDDLSAETIEAFLK   | 42d  | 18 |
| FBgn0014002 | 1028.7  | 42 | 1 | YKPESDDLSAETIEAFLK   | 62d  | 18 |
| FBgn0014002 | 719.6   | 78 | 3 | DLTSVADAEQFLK        | 82d  | 18 |
| FBgn0014002 | 1028.82 | 91 | 2 | YKPESDDLSAETIEAFLK   | 82d  | 18 |
| FBgn0014002 | 1029.25 | 72 | 1 | YKPESDDLSAETIEAFLK   | 112d | 18 |
| FBgn0014002 | 1029.25 | 40 | 1 | YKPESDDLSAETIEAFLK   | 142d | 18 |
| FBgn0014002 | 719.25  | 65 | 1 | DLTSVADAEQFLK        | 2d   | 28 |
| FBgn0014002 | 744.28  | 34 | 1 | FAQVQSLPLIVDFNHESASK | 2d   | 28 |



|             |         |    |   |                       |      |    |
|-------------|---------|----|---|-----------------------|------|----|
| FBgn0014002 | 818.56  | 83 | 3 | SVFEGELNEENLKK        | 2d   | 28 |
| FBgn0014002 | 686.51  | 52 | 2 | YKPESDDLSAETIEAFLK    | 2d   | 28 |
| FBgn0014002 | 719.35  | 46 | 1 | DLTSVADAEQFLK         | 12d  | 28 |
| FBgn0014002 | 818.98  | 63 | 1 | SVFEGELNEENLKK        | 12d  | 28 |
| FBgn0014002 | 1028.8  | 38 | 1 | YKPESDDLSAETIEAFLK    | 12d  | 28 |
| FBgn0014002 | 719.47  | 60 | 1 | DLTSVADAEQFLK         | 50d  | 28 |
| FBgn0014002 | 1029.2  | 37 | 1 | YKPESDDLSAETIEAFLK    | 50d  | 28 |
| FBgn0014002 | 1028.92 | 52 | 1 | YKPESDDLSAETIEAFLK    | 52d  | 28 |
| FBgn0014002 | 719.46  | 64 | 1 | DLTSVADAEQFLK         | 56d  | 28 |
| FBgn0014002 | 686.4   | 39 | 1 | YKPESDDLSAETIEAFLK    | 56d  | 28 |
| FBgn0014026 | 601.57  | 36 | 1 | NFGIGQNVQPK           | 2d   | 28 |
| FBgn0014027 | 710.71  | 60 | 1 | DFGEETPALDVVK         | 2d   | 18 |
| FBgn0014027 | 710.76  | 56 | 2 | DFGEETPALDVVK         | 82d  | 18 |
| FBgn0014027 | 710.66  | 55 | 1 | DFGEETPALDVVK         | 112d | 18 |
| FBgn0014027 | 710.72  | 74 | 2 | DFGEETPALDVVK         | 2d   | 28 |
| FBgn0014028 | 903.05  | 35 | 1 | DLVPDMNNFYEQYR        | 42d  | 28 |
| FBgn0014141 | 756.27  | 45 | 2 | DGTVSVQYLPTAPGEYQVSVR | 2d   | 18 |
| FBgn0014163 | 761.52  | 36 | 1 | AHGIGVHSAEEIEEFGKDDLK | 2d   | 18 |
| FBgn0014163 | 600.77  | 55 | 1 | KDEAVAAPVATK          | 2d   | 18 |
| FBgn0014163 | 882.28  | 74 | 2 | SAAPPADSAAAPAAAPAVEK  | 2d   | 18 |
| FBgn0014163 | 402.92  | 35 | 1 | VETWLR                | 2d   | 18 |
| FBgn0014163 | 882.41  | 87 | 3 | SAAPPADSAAAPAAAPAVEK  | 42d  | 18 |
| FBgn0014163 | 882.63  | 70 | 1 | SAAPPADSAAAPAAAPAVEK  | 102d | 18 |
| FBgn0014163 | 882.23  | 43 | 2 | SAAPPADSAAAPAAAPAVEK  | 112d | 18 |
| FBgn0014163 | 600.91  | 38 | 1 | KDEAVAAPVATK          | 122d | 18 |
| FBgn0014163 | 882.38  | 79 | 2 | SAAPPADSAAAPAAAPAVEK  | 122d | 18 |
| FBgn0014163 | 600.73  | 54 | 3 | KDEAVAAPVATK          | 2d   | 28 |
| FBgn0014163 | 882.64  | 76 | 3 | SAAPPADSAAAPAAAPAVEK  | 2d   | 28 |
| FBgn0014163 | 627.16  | 77 | 3 | YLDSGLTAEQR           | 2d   | 28 |
| FBgn0014163 | 600.58  | 76 | 1 | KDEAVAAPVATK          | 12d  | 28 |
| FBgn0014163 | 882.48  | 78 | 3 | SAAPPADSAAAPAAAPAVEK  | 12d  | 28 |
| FBgn0014163 | 882.2   | 63 | 1 | SAAPPADSAAAPAAAPAVEK  | 42d  | 28 |

|             |         |    |   |                              |      |    |
|-------------|---------|----|---|------------------------------|------|----|
| FBgn0014163 | 882.37  | 75 | 1 | SAAPPADSAAAPAAAPAVEK         | 52d  | 28 |
| FBgn0014163 | 882.27  | 53 | 1 | SAAPPADSAAAPAAAPAVEK         | 56d  | 28 |
| FBgn0014454 | 1268.54 | 74 | 5 | GAIHTAPLAGHIQSVASINAAPAPGTL  | 2d   | 18 |
| FBgn0014454 | 1268.6  | 44 | 2 | GAIHTAPLAGHIQSVASINAAPAPGTL  | 22d  | 18 |
| FBgn0014454 | 1268.51 | 53 | 1 | GAIHTAPLAGHIQSVASINAAPAPGTL  | 42d  | 18 |
| FBgn0014454 | 1268.65 | 46 | 2 | GAIHTAPLAGHIQSVASINAAPAPGTL  | 62d  | 18 |
| FBgn0014454 | 1268.52 | 38 | 1 | GAIHTAPLAGHIQSVASINAAPAPGTL  | 102d | 18 |
| FBgn0014454 | 1268.68 | 44 | 2 | GAIHTAPLAGHIQSVASINAAPAPGTL  | 122d | 18 |
| FBgn0014454 | 1268.89 | 53 | 1 | GAIHTAPLAGHIQSVASINAAPAPGTL  | 132d | 18 |
| FBgn0014454 | 1268.61 | 37 | 2 | GAIHTAPLAGHIQSVASINAAPAPGTL  | 142d | 18 |
| FBgn0014454 | 1268.61 | 43 | 2 | GAIHTAPLAGHIQSVASINAAPAPGTL  | 2d   | 28 |
| FBgn0014454 | 1268.38 | 58 | 5 | GAIHTAPLAGHIQSVASINAAPAPGTL  | 12d  | 28 |
| FBgn0014454 | 1268.56 | 36 | 1 | GAIHTAPLAGHIQSVASINAAPAPGTL  | 32d  | 28 |
| FBgn0014454 | 1268.8  | 43 | 3 | GAIHTAPLAGHIQSVASINAAPAPGTL  | 46d  | 28 |
| FBgn0014454 | 1268.51 | 48 | 3 | GAIHTAPLAGHIQSVASINAAPAPGTL  | 50d  | 28 |
| FBgn0014454 | 1268.57 | 42 | 1 | GAIHTAPLAGHIQSVASINAAPAPGTL  | 52d  | 28 |
| FBgn0014454 | 1268.49 | 45 | 2 | GAIHTAPLAGHIQSVASINAAPAPGTL  | 56d  | 28 |
| FBgn0014455 | 825.56  | 79 | 1 | GLSEETTTGVHNLK               | 2d   | 18 |
| FBgn0014455 | 1570.3  | 57 | 1 | VIVTEVDPINALQAAMEGYEVTMEEASK | 42d  | 28 |
| FBgn0014455 | 1570.19 | 53 | 1 | VIVTEVDPINALQAAMEGYEVTMEEASK | 52d  | 28 |
| FBgn0014869 | 1208.47 | 50 | 3 | SFDTPPPMPEPGHPYENIVK         | 2d   | 18 |
| FBgn0014869 | 999.06  | 40 | 1 | YAEGPKPEEFPQFESLK            | 2d   | 18 |
| FBgn0014869 | 625.83  | 67 | 1 | YGAEQVQIWR                   | 2d   | 18 |
| FBgn0014869 | 860     | 43 | 3 | TLPYWNDVPIQMK                | 22d  | 18 |
| FBgn0014869 | 666.46  | 34 | 2 | YAEGPKPEEFPQFESLK            | 22d  | 18 |
| FBgn0014869 | 625.57  | 74 | 2 | YGAEQVQIWR                   | 22d  | 18 |
| FBgn0014869 | 866.51  | 69 | 1 | DAGLEFDVAHTSVLTR             | 42d  | 18 |
| FBgn0014869 | 1208.57 | 34 | 1 | SFDTPPPMPEPGHPYENIVK         | 42d  | 18 |
| FBgn0014869 | 999.1   | 41 | 2 | YAEGPKPEEFPQFESLK            | 42d  | 18 |
| FBgn0014869 | 625.77  | 73 | 2 | YGAEQVQIWR                   | 42d  | 18 |
| FBgn0014869 | 583.56  | 37 | 1 | ILIAAHGNSLR                  | 62d  | 18 |
| FBgn0014869 | 999.18  | 54 | 2 | YAEGPKPEEFPQFESLK            | 62d  | 18 |

|             |         |    |   |                       |      |    |
|-------------|---------|----|---|-----------------------|------|----|
| FBgn0014869 | 625.38  | 73 | 1 | YGEAQVQIWR            | 62d  | 18 |
| FBgn0014869 | 998.93  | 46 | 2 | YAEGPKPEEFPQFESLK     | 82d  | 18 |
| FBgn0014869 | 625.7   | 61 | 2 | YGEAQVQIWR            | 82d  | 18 |
| FBgn0014869 | 1208.66 | 52 | 1 | SFDTPPPPMEPGHPYYENIVK | 102d | 18 |
| FBgn0014869 | 999.21  | 37 | 1 | YAEGPKPEEFPQFESLK     | 102d | 18 |
| FBgn0014869 | 1208.64 | 45 | 2 | SFDTPPPPMEPGHPYYENIVK | 112d | 18 |
| FBgn0014869 | 999.1   | 45 | 1 | YAEGPKPEEFPQFESLK     | 122d | 18 |
| FBgn0014869 | 999.08  | 42 | 1 | YAEGPKPEEFPQFESLK     | 132d | 18 |
| FBgn0014869 | 625.75  | 57 | 1 | YGEAQVQIWR            | 132d | 18 |
| FBgn0014869 | 867.01  | 69 | 2 | NQFCGWYDANLSEK        | 142d | 18 |
| FBgn0014869 | 1208.42 | 59 | 1 | SFDTPPPPMEPGHPYYENIVK | 142d | 18 |
| FBgn0014869 | 665.99  | 40 | 2 | YAEGPKPEEFPQFESLK     | 142d | 18 |
| FBgn0014869 | 479.74  | 66 | 3 | AIEAVAAQGK            | 2d   | 28 |
| FBgn0014869 | 866.52  | 54 | 2 | DAGLEFDVAHTSVLTR      | 2d   | 28 |
| FBgn0014869 | 1208.12 | 51 | 1 | SFDTPPPPMEPGHPYYENIVK | 2d   | 28 |
| FBgn0014869 | 859.71  | 37 | 1 | TLPYWNDVIIPQMK        | 2d   | 28 |
| FBgn0014869 | 999.01  | 56 | 4 | YAEGPKPEEFPQFESLK     | 2d   | 28 |
| FBgn0014869 | 625.66  | 61 | 1 | YGEAQVQIWR            | 2d   | 28 |
| FBgn0014869 | 866.44  | 34 | 1 | DAGLEFDVAHTSVLTR      | 12d  | 28 |
| FBgn0014869 | 1208.34 | 47 | 1 | SFDTPPPPMEPGHPYYENIVK | 12d  | 28 |
| FBgn0014869 | 999.17  | 41 | 1 | YAEGPKPEEFPQFESLK     | 12d  | 28 |
| FBgn0014869 | 625.16  | 73 | 3 | YGEAQVQIWR            | 12d  | 28 |
| FBgn0014869 | 1208.68 | 36 | 1 | SFDTPPPPMEPGHPYYENIVK | 22d  | 28 |
| FBgn0014869 | 860.14  | 45 | 1 | TLPYWNDVIIPQMK        | 22d  | 28 |
| FBgn0014869 | 625.74  | 73 | 3 | YGEAQVQIWR            | 22d  | 28 |
| FBgn0014869 | 1208.44 | 47 | 1 | SFDTPPPPMEPGHPYYENIVK | 32d  | 28 |
| FBgn0014869 | 999.19  | 36 | 1 | YAEGPKPEEFPQFESLK     | 32d  | 28 |
| FBgn0014869 | 625.87  | 60 | 3 | YGEAQVQIWR            | 32d  | 28 |
| FBgn0014869 | 1208.39 | 41 | 1 | SFDTPPPPMEPGHPYYENIVK | 36d  | 28 |
| FBgn0014869 | 859.91  | 37 | 1 | TLPYWNDVIIPQMK        | 36d  | 28 |
| FBgn0014869 | 998.9   | 41 | 2 | YAEGPKPEEFPQFESLK     | 36d  | 28 |
| FBgn0014869 | 625.78  | 68 | 1 | YGEAQVQIWR            | 36d  | 28 |

|             |         |    |   |                            |     |    |
|-------------|---------|----|---|----------------------------|-----|----|
| FBgn0014869 | 1208.38 | 42 | 2 | SFDTPPPMPEPGHPYYENIVK      | 42d | 28 |
| FBgn0014869 | 860.15  | 56 | 2 | TLPYWNDVIIPQMK             | 42d | 28 |
| FBgn0014869 | 998.93  | 41 | 1 | YAEGPKPEEFPQFESLK          | 42d | 28 |
| FBgn0014869 | 625.96  | 73 | 3 | YGEAQVQIWR                 | 42d | 28 |
| FBgn0014869 | 860.18  | 37 | 1 | TLPYWNDVIIPQMK             | 46d | 28 |
| FBgn0014869 | 998.95  | 49 | 3 | YAEGPKPEEFPQFESLK          | 46d | 28 |
| FBgn0014869 | 625.62  | 75 | 3 | YGEAQVQIWR                 | 46d | 28 |
| FBgn0014869 | 998.9   | 38 | 2 | YAEGPKPEEFPQFESLK          | 50d | 28 |
| FBgn0014869 | 625.88  | 63 | 2 | YGEAQVQIWR                 | 50d | 28 |
| FBgn0014869 | 998.91  | 50 | 2 | YAEGPKPEEFPQFESLK          | 52d | 28 |
| FBgn0014869 | 625.81  | 59 | 1 | YGEAQVQIWR                 | 52d | 28 |
| FBgn0014869 | 860.13  | 40 | 2 | TLPYWNDVIIPQMK             | 56d | 28 |
| FBgn0014877 | 940.2   | 55 | 1 | DLLEVADTLGHATQAVPK         | 56d | 28 |
| FBgn0015031 | 518.74  | 35 | 1 | AAAYADFYSK                 | 2d  | 18 |
| FBgn0015031 | 671.78  | 61 | 3 | ANTPATSSAGPVLR             | 2d  | 18 |
| FBgn0015031 | 671.9   | 73 | 1 | ANTPATSSAGPVLR             | 82d | 18 |
| FBgn0015031 | 671.73  | 68 | 5 | ANTPATSSAGPVLR             | 2d  | 28 |
| FBgn0015218 | 1286.55 | 66 | 1 | EDPQETGEPAGNTATTTAPAGDDAVR | 82d | 18 |
| FBgn0015218 | 1286.37 | 74 | 1 | EDPQETGEPAGNTATTTAPAGDDAVR | 2d  | 28 |
| FBgn0015218 | 1286.42 | 74 | 1 | EDPQETGEPAGNTATTTAPAGDDAVR | 12d | 28 |
| FBgn0015218 | 1286.42 | 95 | 1 | EDPQETGEPAGNTATTTAPAGDDAVR | 56d | 28 |
| FBgn0015221 | 1172.82 | 57 | 4 | FAGIDHIEPEIQSYINANLAK      | 2d  | 18 |
| FBgn0015221 | 1027.73 | 50 | 3 | GTLEVDELHSLALALDTEK        | 2d  | 18 |
| FBgn0015221 | 1105.9  | 68 | 2 | RGTLEVDELHSLALALDTEK       | 2d  | 18 |
| FBgn0015221 | 562.38  | 54 | 2 | SFEDSIALIK                 | 2d  | 18 |
| FBgn0015221 | 982.61  | 67 | 1 | SYDYLLLATHFNSYQK           | 2d  | 18 |
| FBgn0015221 | 1007.71 | 58 | 3 | VPDPSLSVYLFDEYLQK          | 2d  | 18 |
| FBgn0015221 | 921.5   | 42 | 1 | ATHATDAERDPELAHYFEENFLGK   | 22d | 18 |
| FBgn0015221 | 1106.1  | 65 | 1 | RGTLEVDELHSLALALDTEK       | 22d | 18 |
| FBgn0015221 | 561.97  | 45 | 1 | SFEDSIALIK                 | 22d | 18 |
| FBgn0015221 | 1172.5  | 57 | 3 | FAGIDHIEPEIQSYINANLAK      | 42d | 18 |
| FBgn0015221 | 562.34  | 50 | 4 | SFEDSIALIK                 | 42d | 18 |

|             |         |    |   |                          |      |    |
|-------------|---------|----|---|--------------------------|------|----|
| FBgn0015221 | 982.44  | 73 | 3 | SYDYLLLATHFNSYQK         | 42d  | 18 |
| FBgn0015221 | 1007.5  | 49 | 1 | VPDPSLSVYLFDEYLQK        | 42d  | 18 |
| FBgn0015221 | 490.1   | 41 | 2 | GGIVDFNTR                | 62d  | 18 |
| FBgn0015221 | 1028.17 | 92 | 1 | GTLEVDELHSLALALDTEK      | 62d  | 18 |
| FBgn0015221 | 476.93  | 52 | 3 | LYQGLSDR                 | 62d  | 18 |
| FBgn0015221 | 562.24  | 46 | 1 | SFEDSIALIK               | 62d  | 18 |
| FBgn0015221 | 1007.65 | 43 | 1 | VPDPSLSVYLFDEYLQK        | 62d  | 18 |
| FBgn0015221 | 905.13  | 40 | 1 | DPELAHYFEENFLGK          | 82d  | 18 |
| FBgn0015221 | 490.05  | 37 | 1 | GGIVDFNTR                | 82d  | 18 |
| FBgn0015221 | 476.66  | 51 | 1 | LYQGLSDR                 | 82d  | 18 |
| FBgn0015221 | 562.13  | 47 | 2 | SFEDSIALIK               | 82d  | 18 |
| FBgn0015221 | 1106.22 | 56 | 1 | RGTLEVDELHSLALALDTEK     | 102d | 18 |
| FBgn0015221 | 562.24  | 44 | 2 | SFEDSIALIK               | 102d | 18 |
| FBgn0015221 | 1172.8  | 35 | 1 | FAGIDHIEPEIQSYINANLAK    | 112d | 18 |
| FBgn0015221 | 982.71  | 48 | 1 | SYDYLLLATHFNSYQK         | 112d | 18 |
| FBgn0015221 | 982.28  | 47 | 1 | SYDYLLLATHFNSYQK         | 132d | 18 |
| FBgn0015221 | 982.58  | 49 | 1 | SYDYLLLATHFNSYQK         | 142d | 18 |
| FBgn0015221 | 782.23  | 61 | 1 | FAGIDHIEPEIQSYINANLAK    | 2d   | 28 |
| FBgn0015221 | 562.05  | 46 | 1 | SFEDSIALIK               | 2d   | 28 |
| FBgn0015221 | 982.57  | 64 | 2 | SYDYLLLATHFNSYQK         | 2d   | 28 |
| FBgn0015221 | 921.28  | 64 | 1 | ATHATDAERDPELAHYFEENFLGK | 12d  | 28 |
| FBgn0015221 | 982.63  | 74 | 3 | SYDYLLLATHFNSYQK         | 12d  | 28 |
| FBgn0015221 | 1007.63 | 60 | 1 | VPDPSLSVYLFDEYLQK        | 12d  | 28 |
| FBgn0015221 | 737.78  | 46 | 1 | RGTLEVDELHSLALALDTEK     | 32d  | 28 |
| FBgn0015221 | 562.26  | 41 | 2 | SFEDSIALIK               | 32d  | 28 |
| FBgn0015221 | 781.54  | 62 | 2 | FAGIDHIEPEIQSYINANLAK    | 36d  | 28 |
| FBgn0015221 | 737.77  | 47 | 1 | RGTLEVDELHSLALALDTEK     | 36d  | 28 |
| FBgn0015221 | 562.25  | 42 | 2 | SFEDSIALIK               | 36d  | 28 |
| FBgn0015221 | 1381.83 | 43 | 2 | ATHATDAERDPELAHYFEENFLGK | 42d  | 28 |
| FBgn0015221 | 905.63  | 47 | 1 | DPELAHYFEENFLGK          | 42d  | 28 |
| FBgn0015221 | 782.2   | 37 | 1 | FAGIDHIEPEIQSYINANLAK    | 42d  | 28 |
| FBgn0015221 | 510.18  | 34 | 1 | HESSGSVSTK               | 42d  | 28 |

|             |         |     |   |                          |      |    |
|-------------|---------|-----|---|--------------------------|------|----|
| FBgn0015221 | 426.76  | 37  | 1 | QLATGATHVHSR             | 42d  | 28 |
| FBgn0015221 | 562.18  | 50  | 3 | SFEDSIALIK               | 42d  | 28 |
| FBgn0015221 | 1172.64 | 48  | 3 | FAGIDHIEPEIQSYINANLAK    | 46d  | 28 |
| FBgn0015221 | 562.33  | 35  | 1 | SFEDSIALIK               | 46d  | 28 |
| FBgn0015221 | 982.3   | 58  | 3 | SYDYLLLATHFNYSYQK        | 46d  | 28 |
| FBgn0015221 | 1028.09 | 94  | 2 | GTLEVDELHSLALALDTEK      | 50d  | 28 |
| FBgn0015221 | 562.26  | 48  | 3 | SFEDSIALIK               | 50d  | 28 |
| FBgn0015221 | 1381.56 | 34  | 1 | ATHATDAERDPELAHYFEENFLGK | 52d  | 28 |
| FBgn0015221 | 905.34  | 59  | 2 | DPELAHYFEENFLGK          | 52d  | 28 |
| FBgn0015221 | 1028.2  | 66  | 2 | GTLEVDELHSLALALDTEK      | 52d  | 28 |
| FBgn0015221 | 562.37  | 58  | 2 | SFEDSIALIK               | 52d  | 28 |
| FBgn0015221 | 905.54  | 43  | 1 | DPELAHYFEENFLGK          | 56d  | 28 |
| FBgn0015221 | 1027.86 | 113 | 2 | GTLEVDELHSLALALDTEK      | 56d  | 28 |
| FBgn0015221 | 1106.04 | 61  | 2 | RGTLEVDELHSLALALDTEK     | 56d  | 28 |
| FBgn0015221 | 562.19  | 44  | 1 | SFEDSIALIK               | 56d  | 28 |
| FBgn0015221 | 982.59  | 52  | 1 | SYDYLLLATHFNYSYQK        | 56d  | 28 |
| FBgn0015221 | 1007.49 | 78  | 3 | VPDPSLSVYLFDEYLQK        | 56d  | 28 |
| FBgn0015222 | 921.66  | 107 | 1 | GQLTEGVSDLINVPTVAK       | 2d   | 18 |
| FBgn0015222 | 874.39  | 59  | 1 | MMDTNGELGEFLFDK          | 2d   | 18 |
| FBgn0015222 | 556.03  | 43  | 1 | DTVNRPGFAEHFFK           | 22d  | 18 |
| FBgn0015222 | 921.65  | 83  | 3 | GQLTEGVSDLINVPTVAK       | 22d  | 18 |
| FBgn0015222 | 921.6   | 82  | 3 | GQLTEGVSDLINVPTVAK       | 42d  | 18 |
| FBgn0015222 | 874.53  | 40  | 1 | MMDTNGELGEFLFDK          | 42d  | 18 |
| FBgn0015222 | 1024.21 | 105 | 3 | QEWTDGAAALSDALDLEIK      | 42d  | 18 |
| FBgn0015222 | 921.53  | 85  | 2 | GQLTEGVSDLINVPTVAK       | 62d  | 18 |
| FBgn0015222 | 1023.67 | 50  | 1 | QEWTDGAAALSDALDLEIK      | 62d  | 18 |
| FBgn0015222 | 921.48  | 93  | 3 | GQLTEGVSDLINVPTVAK       | 82d  | 18 |
| FBgn0015222 | 833.57  | 40  | 1 | DTVNRPGFAEHFFK           | 102d | 18 |
| FBgn0015222 | 921.61  | 87  | 2 | GQLTEGVSDLINVPTVAK       | 102d | 18 |
| FBgn0015222 | 1022.95 | 51  | 2 | QEWTDGAAALSDALDLEIK      | 102d | 18 |
| FBgn0015222 | 921.62  | 64  | 1 | GQLTEGVSDLINVPTVAK       | 112d | 18 |
| FBgn0015222 | 921.72  | 40  | 1 | GQLTEGVSDLINVPTVAK       | 122d | 18 |

|             |         |     |   |                                       |      |    |
|-------------|---------|-----|---|---------------------------------------|------|----|
| FBgn0015222 | 921.49  | 43  | 1 | GQLTEGVSDLINVPTVAK                    | 132d | 18 |
| FBgn0015222 | 921.7   | 46  | 1 | GQLTEGVSDLINVPTVAK                    | 142d | 18 |
| FBgn0015222 | 921.7   | 91  | 3 | GQLTEGVSDLINVPTVAK                    | 2d   | 28 |
| FBgn0015222 | 874.06  | 99  | 1 | MMDTNGELGEFLFDK                       | 2d   | 28 |
| FBgn0015222 | 921.41  | 85  | 2 | GQLTEGVSDLINVPTVAK                    | 12d  | 28 |
| FBgn0015222 | 921.52  | 74  | 1 | GQLTEGVSDLINVPTVAK                    | 22d  | 28 |
| FBgn0015222 | 921.75  | 90  | 2 | GQLTEGVSDLINVPTVAK                    | 32d  | 28 |
| FBgn0015222 | 921.64  | 69  | 2 | GQLTEGVSDLINVPTVAK                    | 36d  | 28 |
| FBgn0015222 | 874.53  | 71  | 1 | MMDTNGELGEFLFDK                       | 36d  | 28 |
| FBgn0015222 | 921.53  | 79  | 3 | GQLTEGVSDLINVPTVAK                    | 42d  | 28 |
| FBgn0015222 | 874.49  | 92  | 2 | MMDTNGELGEFLFDK                       | 42d  | 28 |
| FBgn0015222 | 1023.9  | 103 | 3 | QEWTDGAAALSDALDLEIK                   | 42d  | 28 |
| FBgn0015222 | 556.06  | 35  | 1 | DTVNRPGFAEHFFK                        | 46d  | 28 |
| FBgn0015222 | 921.41  | 78  | 3 | GQLTEGVSDLINVPTVAK                    | 46d  | 28 |
| FBgn0015222 | 1290.42 | 55  | 1 | GQLTEGVSDLINVPTVAKQEWTDGAAALSDALDLEIK | 46d  | 28 |
| FBgn0015222 | 874.58  | 57  | 1 | MMDTNGELGEFLFDK                       | 46d  | 28 |
| FBgn0015222 | 921.42  | 96  | 2 | GQLTEGVSDLINVPTVAK                    | 50d  | 28 |
| FBgn0015222 | 874.57  | 45  | 1 | MMDTNGELGEFLFDK                       | 50d  | 28 |
| FBgn0015222 | 1024.04 | 86  | 1 | QEWTDGAAALSDALDLEIK                   | 50d  | 28 |
| FBgn0015222 | 921.64  | 105 | 2 | GQLTEGVSDLINVPTVAK                    | 52d  | 28 |
| FBgn0015222 | 921.4   | 90  | 3 | GQLTEGVSDLINVPTVAK                    | 56d  | 28 |
| FBgn0015222 | 874.52  | 54  | 2 | MMDTNGELGEFLFDK                       | 56d  | 28 |
| FBgn0015222 | 1024.12 | 55  | 1 | QEWTDGAAALSDALDLEIK                   | 56d  | 28 |
| FBgn0015234 | 822.32  | 36  | 1 | AKMILLKNNGNALDK                       | 112d | 18 |
| FBgn0015245 | 956.22  | 45  | 1 | ISSVQSIIPALELANAQR                    | 2d   | 18 |
| FBgn0015245 | 1230.35 | 93  | 2 | TAITDASGVASLLTTAEAVVTEIPK             | 2d   | 18 |
| FBgn0015245 | 753.31  | 63  | 1 | VEFQDALLLSEK                          | 2d   | 18 |
| FBgn0015245 | 955.97  | 35  | 1 | ISSVQSIIPALELANAQR                    | 22d  | 18 |
| FBgn0015245 | 956.13  | 45  | 1 | ISSVQSIIPALELANAQR                    | 42d  | 18 |
| FBgn0015245 | 1230.33 | 93  | 2 | TAITDASGVASLLTTAEAVVTEIPK             | 42d  | 18 |
| FBgn0015245 | 739.88  | 90  | 2 | TLTDELEVIEGMK                         | 42d  | 18 |
| FBgn0015245 | 1230.27 | 105 | 5 | TAITDASGVASLLTTAEAVVTEIPK             | 62d  | 18 |

|             |         |     |   |                                     |      |    |
|-------------|---------|-----|---|-------------------------------------|------|----|
| FBgn0015245 | 1229.66 | 108 | 4 | TAITDASGVASLLTTAEAVVTEIPK           | 82d  | 18 |
| FBgn0015245 | 1281.32 | 117 | 2 | LVQDVANNTNEEAGDGTATVTLAR            | 102d | 18 |
| FBgn0015245 | 1230.39 | 73  | 2 | TAITDASGVASLLTTAEAVVTEIPK           | 102d | 18 |
| FBgn0015245 | 1230.29 | 75  | 1 | TAITDASGVASLLTTAEAVVTEIPK           | 112d | 18 |
| FBgn0015245 | 1230.23 | 131 | 1 | TAITDASGVASLLTTAEAVVTEIPK           | 122d | 18 |
| FBgn0015245 | 1281.18 | 99  | 2 | LVQDVANNTNEEAGDGTATVTLAR            | 142d | 18 |
| FBgn0015245 | 955.92  | 64  | 3 | ISSVQSIIPALELANAQR                  | 2d   | 28 |
| FBgn0015245 | 1230.05 | 66  | 2 | TAITDASGVASLLTTAEAVVTEIPK           | 2d   | 28 |
| FBgn0015245 | 753.59  | 89  | 1 | VEFQDALLLSEK                        | 2d   | 28 |
| FBgn0015245 | 1267.59 | 54  | 3 | VETQAGDYGVDALKGEYGNLIEK             | 2d   | 28 |
| FBgn0015245 | 722.75  | 102 | 3 | VSDLGQVGEVVITK                      | 2d   | 28 |
| FBgn0015245 | 956.24  | 39  | 1 | ISSVQSIIPALELANAQR                  | 12d  | 28 |
| FBgn0015245 | 1230.31 | 79  | 1 | TAITDASGVASLLTTAEAVVTEIPK           | 12d  | 28 |
| FBgn0015245 | 739.85  | 40  | 1 | TLTDELEVIEGMK                       | 12d  | 28 |
| FBgn0015245 | 753.61  | 75  | 1 | VEFQDALLLSEK                        | 12d  | 28 |
| FBgn0015245 | 1230.09 | 98  | 4 | TAITDASGVASLLTTAEAVVTEIPK           | 32d  | 28 |
| FBgn0015245 | 706.86  | 37  | 1 | AMMLQGVDVLADAVAVTMGPK               | 36d  | 28 |
| FBgn0015245 | 956.03  | 41  | 1 | ISSVQSIIPALELANAQR                  | 36d  | 28 |
| FBgn0015245 | 1229.73 | 75  | 2 | TAITDASGVASLLTTAEAVVTEIPK           | 36d  | 28 |
| FBgn0015245 | 1210.94 | 67  | 1 | TMSRPVSTPEEIAQVATISANGDQAIGNLISEAMK | 36d  | 28 |
| FBgn0015245 | 706.8   | 47  | 2 | AMMLQGVDVLADAVAVTMGPK               | 42d  | 28 |
| FBgn0015245 | 955.92  | 46  | 3 | ISSVQSIIPALELANAQR                  | 42d  | 28 |
| FBgn0015245 | 1230.16 | 86  | 3 | TAITDASGVASLLTTAEAVVTEIPK           | 42d  | 28 |
| FBgn0015245 | 739.75  | 67  | 1 | TLTDELEVIEGMK                       | 42d  | 28 |
| FBgn0015245 | 956.02  | 42  | 1 | ISSVQSIIPALELANAQR                  | 46d  | 28 |
| FBgn0015245 | 1230.08 | 64  | 1 | TAITDASGVASLLTTAEAVVTEIPK           | 46d  | 28 |
| FBgn0015245 | 739.85  | 77  | 1 | TLTDELEVIEGMK                       | 46d  | 28 |
| FBgn0015245 | 765.84  | 63  | 1 | VETQAGDYGVDALK                      | 46d  | 28 |
| FBgn0015245 | 706.67  | 35  | 1 | AMMLQGVDVLADAVAVTMGPK               | 50d  | 28 |
| FBgn0015245 | 956.04  | 55  | 2 | ISSVQSIIPALELANAQR                  | 50d  | 28 |
| FBgn0015245 | 820.44  | 86  | 5 | TAITDASGVASLLTTAEAVVTEIPK           | 50d  | 28 |
| FBgn0015245 | 1210.92 | 35  | 1 | TMSRPVSTPEEIAQVATISANGDQAIGNLISEAMK | 50d  | 28 |



|             |         |     |   |                           |      |    |
|-------------|---------|-----|---|---------------------------|------|----|
| FBgn0015245 | 765.87  | 88  | 1 | VETQAGDYGYDALK            | 50d  | 28 |
| FBgn0015245 | 722.8   | 82  | 2 | VSDLGQVGEVVITK            | 50d  | 28 |
| FBgn0015245 | 1059.56 | 78  | 1 | AMMLQGVDVLADAVAVTMGPK     | 52d  | 28 |
| FBgn0015245 | 956.11  | 49  | 1 | ISSVQSIIPALELANAQR        | 52d  | 28 |
| FBgn0015245 | 1229.76 | 103 | 4 | TAITDASGVASLLTTAEAVVTEIPK | 52d  | 28 |
| FBgn0015245 | 706.78  | 54  | 1 | AMMLQGVDVLADAVAVTMGPK     | 56d  | 28 |
| FBgn0015245 | 956.18  | 59  | 1 | ISSVQSIIPALELANAQR        | 56d  | 28 |
| FBgn0015245 | 1230.37 | 93  | 4 | TAITDASGVASLLTTAEAVVTEIPK | 56d  | 28 |
| FBgn0015245 | 739.88  | 85  | 2 | TLTDELEVIEGMK             | 56d  | 28 |
| FBgn0015245 | 753.54  | 86  | 4 | VEFQDALLLLSEK             | 56d  | 28 |
| FBgn0015245 | 845.55  | 54  | 1 | VETQAGDYGYDALKGEYGNLIEK   | 56d  | 28 |
| FBgn0015288 | 413.5   | 48  | 1 | KAPAAAAPK                 | 62d  | 18 |
| FBgn0015288 | 689.24  | 56  | 3 | VNNLGNNVTFER              | 2d   | 28 |
| FBgn0015324 | 656.18  | 51  | 3 | NQSEYETVLTK               | 2d   | 18 |
| FBgn0015324 | 763.03  | 48  | 3 | LDLISQQLVPEIR             | 22d  | 18 |
| FBgn0015324 | 656.64  | 55  | 3 | NQSEYETVLTK               | 22d  | 18 |
| FBgn0015324 | 616.65  | 40  | 1 | NVLPAAVEQYK               | 22d  | 18 |
| FBgn0015324 | 762.72  | 57  | 3 | LDLISQQLVPEIR             | 42d  | 18 |
| FBgn0015324 | 762.53  | 62  | 2 | LDLISQQLVPEIR             | 62d  | 18 |
| FBgn0015324 | 656.91  | 53  | 2 | NQSEYETVLTK               | 62d  | 18 |
| FBgn0015324 | 763.06  | 53  | 1 | LDLISQQLVPEIR             | 82d  | 18 |
| FBgn0015324 | 656.7   | 55  | 3 | NQSEYETVLTK               | 82d  | 18 |
| FBgn0015324 | 762.89  | 42  | 2 | LDLISQQLVPEIR             | 112d | 18 |
| FBgn0015324 | 763.09  | 41  | 1 | LDLISQQLVPEIR             | 122d | 18 |
| FBgn0015324 | 763.02  | 53  | 3 | LDLISQQLVPEIR             | 132d | 18 |
| FBgn0015324 | 656.88  | 54  | 3 | NQSEYETVLTK               | 132d | 18 |
| FBgn0015324 | 763.16  | 39  | 1 | LDLISQQLVPEIR             | 142d | 18 |
| FBgn0015324 | 672.21  | 57  | 2 | EDHVSSVLDDAR              | 2d   | 28 |
| FBgn0015324 | 763.08  | 57  | 1 | LDLISQQLVPEIR             | 2d   | 28 |
| FBgn0015324 | 656.69  | 54  | 3 | NQSEYETVLTK               | 2d   | 28 |
| FBgn0015324 | 672.21  | 39  | 1 | EDHVSSVLDDAR              | 12d  | 28 |
| FBgn0015324 | 763     | 35  | 1 | LDLISQQLVPEIR             | 12d  | 28 |

|             |         |     |   |                         |      |    |
|-------------|---------|-----|---|-------------------------|------|----|
| FBgn0015324 | 656.76  | 54  | 2 | NQSEYETVLTk             | 12d  | 28 |
| FBgn0015324 | 762.7   | 39  | 1 | LDLISQQLVPEIR           | 22d  | 28 |
| FBgn0015324 | 656.94  | 40  | 1 | NQSEYETVLTk             | 22d  | 28 |
| FBgn0015324 | 555.1   | 44  | 1 | AEEEFNIEK               | 32d  | 28 |
| FBgn0015324 | 762.82  | 45  | 3 | LDLISQQLVPEIR           | 32d  | 28 |
| FBgn0015324 | 656.71  | 49  | 3 | NQSEYETVLTk             | 32d  | 28 |
| FBgn0015324 | 762.25  | 67  | 1 | LDLISQQLVPEIR           | 36d  | 28 |
| FBgn0015324 | 656.7   | 54  | 1 | NQSEYETVLTk             | 36d  | 28 |
| FBgn0015324 | 616.78  | 39  | 1 | NVLPAAVEQYK             | 36d  | 28 |
| FBgn0015324 | 762.97  | 38  | 1 | LDLISQQLVPEIR           | 42d  | 28 |
| FBgn0015324 | 656.77  | 52  | 2 | NQSEYETVLTk             | 42d  | 28 |
| FBgn0015324 | 762.5   | 46  | 2 | LDLISQQLVPEIR           | 46d  | 28 |
| FBgn0015324 | 656.82  | 67  | 3 | NQSEYETVLTk             | 46d  | 28 |
| FBgn0015324 | 762.93  | 54  | 1 | LDLISQQLVPEIR           | 50d  | 28 |
| FBgn0015324 | 672.35  | 48  | 1 | EDHVSSVLDDAR            | 52d  | 28 |
| FBgn0015324 | 763.13  | 41  | 2 | LDLISQQLVPEIR           | 52d  | 28 |
| FBgn0015324 | 762.58  | 67  | 3 | LDLISQQLVPEIR           | 56d  | 28 |
| FBgn0015372 | 659.42  | 43  | 1 | LQIWDTAGQER             | 36d  | 28 |
| FBgn0015390 | 1253.56 | 71  | 2 | DDQIGAPVDVLPVNLQESLPEEK | 2d   | 18 |
| FBgn0015390 | 1030.91 | 65  | 3 | SLLVSQEASRPESEAESLK     | 2d   | 18 |
| FBgn0015390 | 1248.54 | 112 | 3 | SVLDTNISNVTNLFSTAVETIEK | 2d   | 18 |
| FBgn0015390 | 1253.67 | 36  | 1 | DDQIGAPVDVLPVNLQESLPEEK | 22d  | 18 |
| FBgn0015390 | 687.84  | 38  | 2 | SLLVSQEASRPESEAESLK     | 22d  | 18 |
| FBgn0015390 | 688.86  | 67  | 1 | DGVDAASADATPTGK         | 42d  | 18 |
| FBgn0015390 | 640.08  | 43  | 1 | EASRPASVAESIKDEAEK      | 42d  | 18 |
| FBgn0015390 | 801.9   | 47  | 1 | ELDDLKEEQEVVR           | 42d  | 18 |
| FBgn0015390 | 1248.32 | 71  | 3 | SVLDTNISNVTNLFSTAVETIEK | 42d  | 18 |
| FBgn0015390 | 589.35  | 69  | 1 | TAATGATQATQR            | 42d  | 18 |
| FBgn0015390 | 681.41  | 51  | 1 | EASRPTSVAESVK           | 62d  | 18 |
| FBgn0015390 | 1248.84 | 104 | 1 | SVLDTNISNVTNLFSTAVETIEK | 62d  | 18 |
| FBgn0015390 | 1248.53 | 73  | 2 | SVLDTNISNVTNLFSTAVETIEK | 82d  | 18 |
| FBgn0015390 | 1031.2  | 54  | 1 | SLLVSQEASRPESEAESLK     | 102d | 18 |

|             |         |     |   |                         |      |    |
|-------------|---------|-----|---|-------------------------|------|----|
| FBgn0015390 | 1248.56 | 66  | 2 | SVLDTNISNVTNLFSTAVETIEK | 102d | 18 |
| FBgn0015390 | 444.81  | 56  | 1 | QLEEKLK                 | 112d | 18 |
| FBgn0015390 | 1248.81 | 84  | 3 | SVLDTNISNVTNLFSTAVETIEK | 112d | 18 |
| FBgn0015390 | 589.49  | 79  | 1 | TAATGATQATQR            | 112d | 18 |
| FBgn0015390 | 1031.04 | 55  | 3 | SLLVSQEASRPESEAESLK     | 122d | 18 |
| FBgn0015390 | 1248.62 | 98  | 2 | SVLDTNISNVTNLFSTAVETIEK | 122d | 18 |
| FBgn0015390 | 677.81  | 57  | 1 | TTASAVSSTSASQR          | 122d | 18 |
| FBgn0015390 | 1031.22 | 56  | 2 | SLLVSQEASRPESEAESLK     | 132d | 18 |
| FBgn0015390 | 1248.45 | 36  | 1 | SVLDTNISNVTNLFSTAVETIEK | 142d | 18 |
| FBgn0015390 | 1253.81 | 46  | 2 | DDQIGAPVDVLPVNLQESLPEEK | 2d   | 28 |
| FBgn0015390 | 681.35  | 39  | 1 | EASRPTSVAESVK           | 2d   | 28 |
| FBgn0015390 | 692.08  | 40  | 1 | FLDQADKDFQR             | 2d   | 28 |
| FBgn0015390 | 833.08  | 54  | 1 | QAETTVTDSLEQLTK         | 2d   | 28 |
| FBgn0015390 | 745.78  | 66  | 3 | SAIEATPAPPSASYK         | 2d   | 28 |
| FBgn0015390 | 1248.57 | 98  | 1 | SVLDTNISNVTNLFSTAVETIEK | 2d   | 28 |
| FBgn0015390 | 589.33  | 65  | 1 | TAATGATQATQR            | 2d   | 28 |
| FBgn0015390 | 1038.31 | 84  | 3 | TTTTLQSSEQSSTTTSSTSK    | 2d   | 28 |
| FBgn0015390 | 1253.58 | 58  | 1 | DDQIGAPVDVLPVNLQESLPEEK | 12d  | 28 |
| FBgn0015390 | 899.5   | 49  | 2 | SESRPESVIASGEPVPR       | 12d  | 28 |
| FBgn0015390 | 687.83  | 65  | 3 | SLLVSQEASRPESEAESLK     | 12d  | 28 |
| FBgn0015390 | 824.09  | 54  | 1 | SQEASRPSSVDELLK         | 12d  | 28 |
| FBgn0015390 | 1248.71 | 108 | 3 | SVLDTNISNVTNLFSTAVETIEK | 12d  | 28 |
| FBgn0015390 | 1089.73 | 43  | 1 | VAESGFATVGSVASQQQQQEK   | 12d  | 28 |
| FBgn0015390 | 890.45  | 36  | 1 | SDKDITDIIPDFDER         | 22d  | 28 |
| FBgn0015390 | 1253.52 | 55  | 1 | DDQIGAPVDVLPVNLQESLPEEK | 36d  | 28 |
| FBgn0015390 | 1253.84 | 65  | 2 | DDQIGAPVDVLPVNLQESLPEEK | 42d  | 28 |
| FBgn0015390 | 1248.58 | 39  | 1 | SVLDTNISNVTNLFSTAVETIEK | 42d  | 28 |
| FBgn0015390 | 1248.24 | 77  | 2 | SVLDTNISNVTNLFSTAVETIEK | 46d  | 28 |
| FBgn0015390 | 801.9   | 51  | 1 | ELDDLKEEQEVVR           | 50d  | 28 |
| FBgn0015390 | 1031.01 | 41  | 1 | SLLVSQEASRPESEAESLK     | 50d  | 28 |
| FBgn0015390 | 1248.6  | 82  | 1 | SVLDTNISNVTNLFSTAVETIEK | 50d  | 28 |
| FBgn0015390 | 1253.63 | 60  | 2 | DDQIGAPVDVLPVNLQESLPEEK | 52d  | 28 |

|             |         |    |   |                                |      |    |
|-------------|---------|----|---|--------------------------------|------|----|
| FBgn0015390 | 1030.97 | 58 | 2 | SLLVSQEASRPESEAESLK            | 52d  | 28 |
| FBgn0015527 | 373.11  | 34 | 1 | KDLKLK                         | 46d  | 28 |
| FBgn0015567 | 852.52  | 55 | 1 | LLQNYNPVTEEAGVR                | 2d   | 18 |
| FBgn0015567 | 1186.53 | 80 | 2 | TQVPLTNFNPVLQWSAEDALK          | 2d   | 18 |
| FBgn0015567 | 912.62  | 40 | 1 | FFEPTMNAESFFAR                 | 112d | 18 |
| FBgn0015571 | 731.7   | 37 | 1 | VGPLGFLSLNDPAVGVPGNAGLK        | 46d  | 28 |
| FBgn0015575 | 999.25  | 45 | 1 | LMPQVLQQLDAGTPFIPK             | 22d  | 18 |
| FBgn0015575 | 879.55  | 39 | 1 | VWESLYDDNKDLLF                 | 42d  | 18 |
| FBgn0015575 | 999.23  | 43 | 1 | LMPQVLQQLDAGTPFIPK             | 56d  | 28 |
| FBgn0015575 | 848.1   | 46 | 1 | YDFDSEELIFPYR                  | 56d  | 28 |
| FBgn0015600 | 401.67  | 41 | 2 | LAEANQR                        | 32d  | 28 |
| FBgn0015600 | 401.78  | 41 | 1 | LAEANQR                        | 36d  | 28 |
| FBgn0015600 | 401.46  | 41 | 1 | LAEANQR                        | 42d  | 28 |
| FBgn0015609 | 399.41  | 37 | 1 | GEPPKSGVATVR                   | 22d  | 28 |
| FBgn0015618 | 891.72  | 35 | 1 | AFHLLQKLLMLDPNK                | 82d  | 18 |
| FBgn0015777 | 856.1   | 66 | 3 | HWTDSLDDFLAVYK                 | 2d   | 18 |
| FBgn0015777 | 1028.91 | 54 | 1 | SLIGTNPGLGFRPLPPVDNVESTLIWYK   | 2d   | 18 |
| FBgn0015777 | 856.1   | 69 | 2 | HWTDSLDDFLAVYK                 | 42d  | 18 |
| FBgn0015777 | 854.85  | 63 | 3 | HWTDSLDDFLAVYK                 | 82d  | 18 |
| FBgn0015777 | 855.73  | 57 | 1 | HWTDSLDDFLAVYK                 | 122d | 18 |
| FBgn0015777 | 855.8   | 41 | 1 | HWTDSLDDFLAVYK                 | 132d | 18 |
| FBgn0015777 | 855.86  | 64 | 3 | HWTDSLDDFLAVYK                 | 56d  | 28 |
| FBgn0015788 | 1454.86 | 41 | 1 | SAEEEEAQETPGELEDVASSISTDSGALGK | 62d  | 18 |
| FBgn0015788 | 1454.86 | 58 | 1 | SAEEEEAQETPGELEDVASSISTDSGALGK | 82d  | 18 |
| FBgn0015788 | 1454.73 | 49 | 2 | SAEEEEAQETPGELEDVASSISTDSGALGK | 112d | 18 |
| FBgn0015788 | 665.47  | 44 | 1 | LQLWDIAGQER                    | 122d | 18 |
| FBgn0015788 | 1454.57 | 37 | 1 | SAEEEEAQETPGELEDVASSISTDSGALGK | 132d | 18 |
| FBgn0015788 | 1454.85 | 63 | 1 | SAEEEEAQETPGELEDVASSISTDSGALGK | 2d   | 28 |
| FBgn0015788 | 1454.73 | 46 | 1 | SAEEEEAQETPGELEDVASSISTDSGALGK | 12d  | 28 |
| FBgn0015788 | 1454.44 | 45 | 1 | SAEEEEAQETPGELEDVASSISTDSGALGK | 42d  | 28 |
| FBgn0015797 | 659.36  | 44 | 1 | LQLWDTAGQER                    | 132d | 18 |
| FBgn0015806 | 508.11  | 37 | 2 | TIETILKAK                      | 22d  | 28 |

|             |        |    |   |                    |      |    |
|-------------|--------|----|---|--------------------|------|----|
| FBgn0015806 | 508.34 | 37 | 1 | TIETILKAK          | 42d  | 28 |
| FBgn0015806 | 508.64 | 37 | 1 | TIETILKAK          | 50d  | 28 |
| FBgn0015806 | 508.26 | 37 | 1 | TIETILKAK          | 52d  | 28 |
| FBgn0016075 | 896.78 | 74 | 1 | GDQGEVGYTGADGPQGQR | 2d   | 28 |
| FBgn0016119 | 688.54 | 82 | 2 | ASDPIQQLFLDK       | 2d   | 18 |
| FBgn0016119 | 627.94 | 56 | 4 | FPEFQFPDVK         | 2d   | 18 |
| FBgn0016119 | 579.91 | 51 | 1 | LVDSNPDIER         | 2d   | 18 |
| FBgn0016119 | 688.11 | 75 | 3 | ASDPIQQLFLDK       | 22d  | 18 |
| FBgn0016119 | 627.59 | 63 | 5 | FPEFQFPDVK         | 22d  | 18 |
| FBgn0016119 | 579.8  | 44 | 1 | LVDSNPDIER         | 22d  | 18 |
| FBgn0016119 | 688.17 | 84 | 3 | ASDPIQQLFLDK       | 42d  | 18 |
| FBgn0016119 | 627.44 | 56 | 6 | FPEFQFPDVK         | 42d  | 18 |
| FBgn0016119 | 579.9  | 38 | 1 | LVDSNPDIER         | 42d  | 18 |
| FBgn0016119 | 688.42 | 84 | 3 | ASDPIQQLFLDK       | 62d  | 18 |
| FBgn0016119 | 627.9  | 69 | 5 | FPEFQFPDVK         | 62d  | 18 |
| FBgn0016119 | 579.78 | 49 | 2 | LVDSNPDIER         | 62d  | 18 |
| FBgn0016119 | 688.21 | 76 | 3 | ASDPIQQLFLDK       | 82d  | 18 |
| FBgn0016119 | 627.81 | 66 | 3 | FPEFQFPDVK         | 82d  | 18 |
| FBgn0016119 | 579.79 | 39 | 1 | LVDSNPDIER         | 82d  | 18 |
| FBgn0016119 | 688.28 | 84 | 3 | ASDPIQQLFLDK       | 102d | 18 |
| FBgn0016119 | 627.19 | 56 | 2 | FPEFQFPDVK         | 102d | 18 |
| FBgn0016119 | 688.53 | 69 | 1 | ASDPIQQLFLDK       | 112d | 18 |
| FBgn0016119 | 627.9  | 61 | 2 | FPEFQFPDVK         | 112d | 18 |
| FBgn0016119 | 688.31 | 86 | 2 | ASDPIQQLFLDK       | 122d | 18 |
| FBgn0016119 | 627.56 | 59 | 6 | FPEFQFPDVK         | 122d | 18 |
| FBgn0016119 | 688.44 | 65 | 1 | ASDPIQQLFLDK       | 132d | 18 |
| FBgn0016119 | 627.57 | 50 | 2 | FPEFQFPDVK         | 132d | 18 |
| FBgn0016119 | 579.49 | 62 | 1 | LVDSNPDIER         | 132d | 18 |
| FBgn0016119 | 688.35 | 66 | 2 | ASDPIQQLFLDK       | 142d | 18 |
| FBgn0016119 | 627.42 | 71 | 5 | FPEFQFPDVK         | 142d | 18 |
| FBgn0016119 | 688.39 | 69 | 2 | ASDPIQQLFLDK       | 2d   | 28 |
| FBgn0016119 | 627.98 | 58 | 6 | FPEFQFPDVK         | 2d   | 28 |

|             |         |    |   |                              |      |    |
|-------------|---------|----|---|------------------------------|------|----|
| FBgn0016119 | 579.59  | 62 | 8 | LVDSNPDIER                   | 2d   | 28 |
| FBgn0016119 | 688.5   | 79 | 3 | ASDPIQQLFLDK                 | 12d  | 28 |
| FBgn0016119 | 627.93  | 67 | 4 | FPEFQFPDVK                   | 12d  | 28 |
| FBgn0016119 | 579.94  | 62 | 4 | LVDSNPDIER                   | 12d  | 28 |
| FBgn0016119 | 687.89  | 69 | 3 | ASDPIQQLFLDK                 | 22d  | 28 |
| FBgn0016119 | 627.6   | 63 | 4 | FPEFQFPDVK                   | 22d  | 28 |
| FBgn0016119 | 579.83  | 51 | 1 | LVDSNPDIER                   | 22d  | 28 |
| FBgn0016119 | 688.15  | 65 | 3 | ASDPIQQLFLDK                 | 32d  | 28 |
| FBgn0016119 | 627.47  | 59 | 5 | FPEFQFPDVK                   | 32d  | 28 |
| FBgn0016119 | 579.55  | 62 | 2 | LVDSNPDIER                   | 32d  | 28 |
| FBgn0016119 | 688.13  | 70 | 3 | ASDPIQQLFLDK                 | 36d  | 28 |
| FBgn0016119 | 627.97  | 62 | 2 | FPEFQFPDVK                   | 36d  | 28 |
| FBgn0016119 | 688.24  | 71 | 1 | ASDPIQQLFLDK                 | 42d  | 28 |
| FBgn0016119 | 627.66  | 71 | 3 | FPEFQFPDVK                   | 42d  | 28 |
| FBgn0016119 | 579.72  | 46 | 1 | LVDSNPDIER                   | 42d  | 28 |
| FBgn0016119 | 688.5   | 65 | 2 | ASDPIQQLFLDK                 | 46d  | 28 |
| FBgn0016119 | 628.04  | 65 | 2 | FPEFQFPDVK                   | 46d  | 28 |
| FBgn0016119 | 688.52  | 73 | 3 | ASDPIQQLFLDK                 | 50d  | 28 |
| FBgn0016119 | 627.66  | 65 | 3 | FPEFQFPDVK                   | 50d  | 28 |
| FBgn0016119 | 688.61  | 65 | 2 | ASDPIQQLFLDK                 | 52d  | 28 |
| FBgn0016119 | 627.58  | 67 | 3 | FPEFQFPDVK                   | 52d  | 28 |
| FBgn0016119 | 688.01  | 82 | 6 | ASDPIQQLFLDK                 | 56d  | 28 |
| FBgn0016119 | 627.8   | 62 | 3 | FPEFQFPDVK                   | 56d  | 28 |
| FBgn0016120 | 687.29  | 92 | 2 | LVPVAGLVDSFQK                | 2d   | 18 |
| FBgn0016120 | 687.6   | 70 | 1 | LVPVAGLVDSFQK                | 22d  | 18 |
| FBgn0016120 | 1067.66 | 42 | 1 | DAFPDSALDPLNKPTFWPHTPEEQVGYK | 42d  | 18 |
| FBgn0016120 | 687.41  | 60 | 3 | LVPVAGLVDSFQK                | 42d  | 18 |
| FBgn0016120 | 1067.45 | 39 | 2 | DAFPDSALDPLNKPTFWPHTPEEQVGYK | 62d  | 18 |
| FBgn0016120 | 687.46  | 39 | 1 | LVPVAGLVDSFQK                | 62d  | 18 |
| FBgn0016120 | 687.35  | 61 | 1 | LVPVAGLVDSFQK                | 82d  | 18 |
| FBgn0016120 | 687.34  | 49 | 1 | LVPVAGLVDSFQK                | 102d | 18 |
| FBgn0016120 | 1066.9  | 58 | 1 | DAFPDSALDPLNKPTFWPHTPEEQVGYK | 112d | 18 |

|             |         |    |   |                              |      |    |
|-------------|---------|----|---|------------------------------|------|----|
| FBgn0016120 | 687.42  | 60 | 1 | LVPVAGLVDSFQK                | 112d | 18 |
| FBgn0016120 | 1067.65 | 40 | 1 | DAFPDSALDPLNKPTFWPHTPEEQVGYK | 122d | 18 |
| FBgn0016120 | 687.4   | 64 | 1 | LVPVAGLVDSFQK                | 122d | 18 |
| FBgn0016120 | 1067.02 | 41 | 2 | DAFPDSALDPLNKPTFWPHTPEEQVGYK | 132d | 18 |
| FBgn0016120 | 687.53  | 68 | 2 | LVPVAGLVDSFQK                | 132d | 18 |
| FBgn0016120 | 1067.51 | 39 | 2 | DAFPDSALDPLNKPTFWPHTPEEQVGYK | 2d   | 28 |
| FBgn0016120 | 687.17  | 53 | 1 | LVPVAGLVDSFQK                | 2d   | 28 |
| FBgn0016120 | 538.7   | 63 | 2 | VSSQVDAEIK                   | 2d   | 28 |
| FBgn0016120 | 1067.6  | 53 | 2 | DAFPDSALDPLNKPTFWPHTPEEQVGYK | 12d  | 28 |
| FBgn0016120 | 687.27  | 58 | 2 | LVPVAGLVDSFQK                | 12d  | 28 |
| FBgn0016120 | 1067.15 | 54 | 2 | DAFPDSALDPLNKPTFWPHTPEEQVGYK | 22d  | 28 |
| FBgn0016120 | 687.53  | 75 | 1 | LVPVAGLVDSFQK                | 22d  | 28 |
| FBgn0016120 | 1067.66 | 38 | 1 | DAFPDSALDPLNKPTFWPHTPEEQVGYK | 32d  | 28 |
| FBgn0016120 | 1067.38 | 36 | 1 | DAFPDSALDPLNKPTFWPHTPEEQVGYK | 36d  | 28 |
| FBgn0016120 | 687.38  | 62 | 3 | LVPVAGLVDSFQK                | 36d  | 28 |
| FBgn0016120 | 1067.46 | 43 | 1 | DAFPDSALDPLNKPTFWPHTPEEQVGYK | 42d  | 28 |
| FBgn0016120 | 1067.58 | 50 | 1 | DAFPDSALDPLNKPTFWPHTPEEQVGYK | 46d  | 28 |
| FBgn0016120 | 687.15  | 59 | 2 | LVPVAGLVDSFQK                | 46d  | 28 |
| FBgn0016120 | 687.61  | 69 | 2 | LVPVAGLVDSFQK                | 50d  | 28 |
| FBgn0016120 | 687.23  | 57 | 3 | LVPVAGLVDSFQK                | 56d  | 28 |
| FBgn0016672 | 672.98  | 35 | 1 | TLADVLIQETIK                 | 42d  | 18 |
| FBgn0016672 | 866.47  | 53 | 1 | DTGVPVMGVVAQPFGEK            | 132d | 18 |
| FBgn0016685 | 699.74  | 36 | 1 | AVNPDVEFYESK                 | 2d   | 18 |
| FBgn0016685 | 760.29  | 59 | 2 | ENEFNVVEVNTPK                | 2d   | 18 |
| FBgn0016685 | 699.89  | 38 | 1 | AVNPDVEFYESK                 | 62d  | 18 |
| FBgn0016685 | 699.85  | 39 | 1 | AVNPDVEFYESK                 | 2d   | 28 |
| FBgn0016685 | 760.4   | 73 | 1 | ENEFNVVEVNTPK                | 2d   | 28 |
| FBgn0016687 | 1280.03 | 56 | 1 | FWQNLVHQSPASGSISTTNITNR      | 2d   | 18 |
| FBgn0016687 | 773.42  | 90 | 2 | NADFANTIAETHK                | 2d   | 18 |
| FBgn0016687 | 918.61  | 57 | 2 | VNDIADVDQYFPGLLR             | 22d  | 18 |
| FBgn0016687 | 918.64  | 55 | 3 | VNDIADVDQYFPGLLR             | 42d  | 18 |
| FBgn0016687 | 918.32  | 67 | 1 | VNDIADVDQYFPGLLR             | 62d  | 18 |

|             |         |    |   |                         |      |    |
|-------------|---------|----|---|-------------------------|------|----|
| FBgn0016687 | 918.43  | 53 | 1 | VNDIADVDQYFPGLLR        | 82d  | 18 |
| FBgn0016687 | 1280.08 | 43 | 1 | FWQNLVHQSPASGSISTTNITNR | 122d | 18 |
| FBgn0016687 | 918.69  | 51 | 1 | VNDIADVDQYFPGLLR        | 122d | 18 |
| FBgn0016687 | 918.55  | 34 | 1 | VNDIADVDQYFPGLLR        | 132d | 18 |
| FBgn0016687 | 773.33  | 90 | 1 | NADFANTIIAETHK          | 142d | 18 |
| FBgn0016687 | 918.71  | 52 | 1 | VNDIADVDQYFPGLLR        | 142d | 18 |
| FBgn0016687 | 1279.99 | 61 | 1 | FWQNLVHQSPASGSISTTNITNR | 2d   | 28 |
| FBgn0016687 | 773.25  | 92 | 2 | NADFANTIIAETHK          | 2d   | 28 |
| FBgn0016687 | 918.55  | 56 | 2 | VNDIADVDQYFPGLLR        | 2d   | 28 |
| FBgn0016687 | 1280.37 | 63 | 2 | FWQNLVHQSPASGSISTTNITNR | 12d  | 28 |
| FBgn0016687 | 773.43  | 97 | 1 | NADFANTIIAETHK          | 12d  | 28 |
| FBgn0016687 | 918.71  | 51 | 1 | VNDIADVDQYFPGLLR        | 12d  | 28 |
| FBgn0016687 | 1280.08 | 56 | 1 | FWQNLVHQSPASGSISTTNITNR | 22d  | 28 |
| FBgn0016687 | 918.61  | 57 | 1 | VNDIADVDQYFPGLLR        | 22d  | 28 |
| FBgn0016687 | 685.63  | 54 | 2 | IIAIDVNDPLASK           | 36d  | 28 |
| FBgn0016687 | 918.64  | 76 | 2 | VNDIADVDQYFPGLLR        | 36d  | 28 |
| FBgn0016687 | 918.64  | 39 | 1 | VNDIADVDQYFPGLLR        | 42d  | 28 |
| FBgn0016687 | 918.7   | 39 | 1 | VNDIADVDQYFPGLLR        | 46d  | 28 |
| FBgn0016687 | 773.46  | 95 | 1 | NADFANTIIAETHK          | 52d  | 28 |
| FBgn0016687 | 918.38  | 43 | 1 | VNDIADVDQYFPGLLR        | 52d  | 28 |
| FBgn0016687 | 773.39  | 92 | 1 | NADFANTIIAETHK          | 56d  | 28 |
| FBgn0016687 | 918.42  | 49 | 2 | VNDIADVDQYFPGLLR        | 56d  | 28 |
| FBgn0016691 | 530.66  | 63 | 1 | LSQLDQVEK               | 2d   | 18 |
| FBgn0016691 | 1009.45 | 70 | 1 | GEVVCEVVTAKPLDASQSK     | 22d  | 18 |
| FBgn0016691 | 583.21  | 61 | 1 | KLDTVINAYK              | 22d  | 18 |
| FBgn0016691 | 792.34  | 83 | 1 | VDPSIIGGLIVSIGDK        | 22d  | 18 |
| FBgn0016691 | 581.61  | 47 | 1 | FAPATVNLLGLLADNGR       | 42d  | 18 |
| FBgn0016691 | 792.32  | 79 | 3 | VDPSIIGGLIVSIGDK        | 42d  | 18 |
| FBgn0016691 | 552.01  | 42 | 1 | DLTALQATIR              | 62d  | 18 |
| FBgn0016691 | 871.82  | 81 | 1 | FAPATVNLLGLLADNGR       | 62d  | 18 |
| FBgn0016691 | 792.36  | 48 | 1 | VDPSIIGGLIVSIGDK        | 62d  | 18 |
| FBgn0016691 | 552.05  | 54 | 1 | DLTALQATIR              | 82d  | 18 |



|             |         |    |   |                     |      |    |
|-------------|---------|----|---|---------------------|------|----|
| FBgn0016691 | 1009.31 | 71 | 1 | GEVVCEVVTAKPLDASQSK | 82d  | 18 |
| FBgn0016691 | 583.38  | 63 | 2 | KLDTVINAYK          | 82d  | 18 |
| FBgn0016691 | 530.83  | 47 | 1 | LSQLDQVEK           | 82d  | 18 |
| FBgn0016691 | 792.42  | 66 | 1 | VDPSIIGGLIVSIGDK    | 82d  | 18 |
| FBgn0016691 | 872.22  | 58 | 1 | FAPATVNLLGLLADNGR   | 102d | 18 |
| FBgn0016691 | 583.52  | 47 | 1 | KLDTVINAYK          | 102d | 18 |
| FBgn0016691 | 872.16  | 57 | 1 | FAPATVNLLGLLADNGR   | 112d | 18 |
| FBgn0016691 | 1009.48 | 81 | 2 | GEVVCEVVTAKPLDASQSK | 132d | 18 |
| FBgn0016691 | 583.35  | 62 | 1 | KLDTVINAYK          | 132d | 18 |
| FBgn0016691 | 871.75  | 67 | 1 | FAPATVNLLGLLADNGR   | 142d | 18 |
| FBgn0016691 | 551.67  | 40 | 1 | DLTALQATIR          | 2d   | 28 |
| FBgn0016691 | 582.72  | 42 | 1 | EYVTSPIINK          | 2d   | 28 |
| FBgn0016691 | 871.88  | 79 | 3 | FAPATVNLLGLLADNGR   | 2d   | 28 |
| FBgn0016691 | 1009.41 | 73 | 2 | GEVVCEVVTAKPLDASQSK | 2d   | 28 |
| FBgn0016691 | 871.87  | 67 | 2 | FAPATVNLLGLLADNGR   | 12d  | 28 |
| FBgn0016691 | 1009.44 | 85 | 3 | GEVVCEVVTAKPLDASQSK | 12d  | 28 |
| FBgn0016691 | 583.22  | 67 | 2 | KLDTVINAYK          | 22d  | 28 |
| FBgn0016691 | 791.91  | 94 | 3 | VDPSIIGGLIVSIGDK    | 22d  | 28 |
| FBgn0016691 | 872     | 92 | 2 | FAPATVNLLGLLADNGR   | 32d  | 28 |
| FBgn0016691 | 583.2   | 69 | 2 | KLDTVINAYK          | 32d  | 28 |
| FBgn0016691 | 530.93  | 55 | 3 | LSQLDQVEK           | 32d  | 28 |
| FBgn0016691 | 792.4   | 73 | 3 | VDPSIIGGLIVSIGDK    | 32d  | 28 |
| FBgn0016691 | 582.56  | 34 | 1 | EYVTSPIINK          | 36d  | 28 |
| FBgn0016691 | 872.17  | 60 | 1 | FAPATVNLLGLLADNGR   | 36d  | 28 |
| FBgn0016691 | 1009.42 | 73 | 3 | GEVVCEVVTAKPLDASQSK | 36d  | 28 |
| FBgn0016691 | 792.57  | 40 | 2 | VDPSIIGGLIVSIGDK    | 36d  | 28 |
| FBgn0016691 | 582.67  | 41 | 1 | EYVTSPIINK          | 42d  | 28 |
| FBgn0016691 | 581.73  | 67 | 3 | FAPATVNLLGLLADNGR   | 42d  | 28 |
| FBgn0016691 | 583.26  | 64 | 3 | KLDTVINAYK          | 42d  | 28 |
| FBgn0016691 | 530.68  | 47 | 3 | LSQLDQVEK           | 42d  | 28 |
| FBgn0016691 | 792.44  | 61 | 1 | VDPSIIGGLIVSIGDK    | 42d  | 28 |
| FBgn0016691 | 872.13  | 72 | 2 | FAPATVNLLGLLADNGR   | 46d  | 28 |

|             |         |    |   |                                     |      |    |
|-------------|---------|----|---|-------------------------------------|------|----|
| FBgn0016691 | 1009.58 | 69 | 1 | GEVVCEVVTAKPLDASQSK                 | 46d  | 28 |
| FBgn0016691 | 530.73  | 40 | 1 | LSQLDQVEK                           | 46d  | 28 |
| FBgn0016691 | 792.4   | 49 | 1 | VDPSIIGGLIVSIGDK                    | 46d  | 28 |
| FBgn0016691 | 582.7   | 35 | 1 | EYVTSPIINK                          | 50d  | 28 |
| FBgn0016691 | 871.93  | 83 | 1 | FAPATVNLLGLLADNGR                   | 50d  | 28 |
| FBgn0016691 | 1009.45 | 77 | 1 | GEVVCEVVTAKPLDASQSK                 | 50d  | 28 |
| FBgn0016691 | 530.83  | 44 | 2 | LSQLDQVEK                           | 50d  | 28 |
| FBgn0016691 | 1009.67 | 53 | 1 | GEVVCEVVTAKPLDASQSK                 | 52d  | 28 |
| FBgn0016691 | 792.59  | 83 | 2 | VDPSIIGGLIVSIGDK                    | 52d  | 28 |
| FBgn0016691 | 551.6   | 60 | 1 | DLTALQATIR                          | 56d  | 28 |
| FBgn0016691 | 871.94  | 71 | 2 | FAPATVNLLGLLADNGR                   | 56d  | 28 |
| FBgn0016693 | 721.25  | 65 | 1 | LFEDDEEQDLFR                        | 42d  | 18 |
| FBgn0016693 | 741.3   | 51 | 1 | VYIGSFWDQPLR                        | 112d | 18 |
| FBgn0016697 | 1248.48 | 68 | 1 | AIGSGSEGAQQNLQDLFRPDLTLDEAIDISLNTLK | 2d   | 18 |
| FBgn0016724 | 671.3   | 76 | 3 | AFQLALDYPPFR                        | 2d   | 18 |
| FBgn0016724 | 955.05  | 65 | 3 | AIGEIVKPINDAAQEVK                   | 2d   | 18 |
| FBgn0016724 | 878.01  | 62 | 2 | EKPIIISSIAELLGDR                    | 2d   | 18 |
| FBgn0016724 | 697.71  | 74 | 2 | FDGALIHLIAPVK                       | 2d   | 18 |
| FBgn0016724 | 957.66  | 65 | 3 | IVNHLIENVQLTETYK                    | 2d   | 18 |
| FBgn0016724 | 758.01  | 71 | 3 | IVVNAAEGVTHEFK                      | 2d   | 18 |
| FBgn0016724 | 571.64  | 51 | 1 | MDASLGYGAEK                         | 2d   | 18 |
| FBgn0016724 | 841.82  | 72 | 2 | MLNQITSSLADTLFK                     | 2d   | 18 |
| FBgn0016724 | 1155.77 | 87 | 3 | NDIVQELEADQSIAPIIDGIR               | 2d   | 18 |
| FBgn0016724 | 748.53  | 40 | 1 | NYCQGPEIDAISK                       | 2d   | 18 |
| FBgn0016724 | 999.65  | 93 | 6 | QSDSETLLELAAFPHPNK                  | 2d   | 18 |
| FBgn0016724 | 1069.08 | 91 | 2 | SGLSQGNIDAQLSDTPFGSNK               | 2d   | 18 |
| FBgn0016724 | 785.88  | 43 | 3 | SLIFQRPETYTSK                       | 2d   | 18 |
| FBgn0016724 | 1083.7  | 54 | 1 | SSILNCLLNENWDVVFNK                  | 2d   | 18 |
| FBgn0016724 | 1147.78 | 73 | 3 | SSILNCLLNENWDVVFNKK                 | 2d   | 18 |
| FBgn0016724 | 1063.06 | 94 | 5 | SVDKETLNQAASQLLPNAPK                | 2d   | 18 |
| FBgn0016724 | 649.3   | 39 | 1 | TFKPLDDSTYVVTALFK                   | 2d   | 18 |
| FBgn0016724 | 813.93  | 59 | 1 | TILSDLVDSTGDYVK                     | 2d   | 18 |

|             |         |    |   |                       |     |    |
|-------------|---------|----|---|-----------------------|-----|----|
| FBgn0016724 | 725.71  | 49 | 2 | VIGTPDKTNSDFR         | 2d  | 18 |
| FBgn0016724 | 775.55  | 51 | 2 | VQILDKNPIEITSEVQPNSAK | 2d  | 18 |
| FBgn0016724 | 843.5   | 66 | 3 | YQFTANVQPTSSTIK       | 2d  | 18 |
| FBgn0016724 | 981.12  | 75 | 2 | YQYHLDSFIITGNMFK      | 2d  | 18 |
| FBgn0016724 | 671.14  | 58 | 2 | AFQLALDYPPFR          | 22d | 18 |
| FBgn0016724 | 955.02  | 75 | 3 | AIGEIVKPINDAAQEVK     | 22d | 18 |
| FBgn0016724 | 585.79  | 40 | 1 | EKPIIISSIAELLGDR      | 22d | 18 |
| FBgn0016724 | 848.29  | 34 | 1 | ETLNQAASQLLPNAPK      | 22d | 18 |
| FBgn0016724 | 698.15  | 75 | 3 | FDGALIHLIAPVK         | 22d | 18 |
| FBgn0016724 | 660.56  | 62 | 1 | HAQDYSLEASAK          | 22d | 18 |
| FBgn0016724 | 540.2   | 42 | 1 | ILDIYNSLK             | 22d | 18 |
| FBgn0016724 | 957.94  | 64 | 3 | IVNHLEIENVQLTETYK     | 22d | 18 |
| FBgn0016724 | 758.12  | 88 | 2 | IVVNAAEGVTHEFK        | 22d | 18 |
| FBgn0016724 | 841.98  | 52 | 2 | MLNQITSSLADTLFK       | 22d | 18 |
| FBgn0016724 | 1155.82 | 60 | 1 | NDIVQELEADQSIAPIDGIR  | 22d | 18 |
| FBgn0016724 | 748.16  | 56 | 2 | NYCQGPEIDAISK         | 22d | 18 |
| FBgn0016724 | 690.12  | 92 | 1 | RQDFIDGTAEVK          | 22d | 18 |
| FBgn0016724 | 1063.18 | 79 | 3 | SVDKETLNQAASQLLPNAPK  | 22d | 18 |
| FBgn0016724 | 843.32  | 45 | 1 | YQFTANVQPTSSTIK       | 22d | 18 |
| FBgn0016724 | 671.32  | 66 | 3 | AFQLALDYPPFR          | 42d | 18 |
| FBgn0016724 | 524.17  | 49 | 2 | ANSPGTGSTVR           | 42d | 18 |
| FBgn0016724 | 704.92  | 36 | 1 | DFGYPYEFELK           | 42d | 18 |
| FBgn0016724 | 697.58  | 71 | 3 | FDGALIHLIAPVK         | 42d | 18 |
| FBgn0016724 | 566.91  | 59 | 1 | GLSLEGVLSEK           | 42d | 18 |
| FBgn0016724 | 517.1   | 51 | 2 | IPADGSLFGR            | 42d | 18 |
| FBgn0016724 | 999.2   | 78 | 3 | QSDSETLLELAAFPHPNK    | 42d | 18 |
| FBgn0016724 | 1069.18 | 83 | 2 | SGLSQGNIDAQLSDTPFGSNK | 42d | 18 |
| FBgn0016724 | 1062.98 | 80 | 3 | SVDKETLNQAASQLLPNAPK  | 42d | 18 |
| FBgn0016724 | 973.51  | 68 | 3 | TFKPLDDSTYVVVALFK     | 42d | 18 |
| FBgn0016724 | 878     | 69 | 2 | TILSDLVDSTGDYVKK      | 42d | 18 |
| FBgn0016724 | 1162.51 | 68 | 1 | VQILDKNPIEITSEVQPNSAK | 42d | 18 |
| FBgn0016724 | 843.45  | 39 | 1 | YQFTANVQPTSSTIK       | 42d | 18 |

|             |         |    |   |                       |     |    |
|-------------|---------|----|---|-----------------------|-----|----|
| FBgn0016724 | 981     | 86 | 3 | YQYHLDSFIITGNNEFK     | 42d | 18 |
| FBgn0016724 | 671.41  | 66 | 1 | AFQLALDYPPFR          | 62d | 18 |
| FBgn0016724 | 955.02  | 53 | 2 | AIGEIVKPINDAAQEVK     | 62d | 18 |
| FBgn0016724 | 524.25  | 45 | 3 | ANSPGTGSTVR           | 62d | 18 |
| FBgn0016724 | 704.88  | 48 | 1 | DFGYPYEFELK           | 62d | 18 |
| FBgn0016724 | 878.11  | 59 | 1 | EKPIIISSIAELLGDR      | 62d | 18 |
| FBgn0016724 | 566.77  | 37 | 1 | EQINSGLVSGK           | 62d | 18 |
| FBgn0016724 | 698.15  | 83 | 2 | FDGALIHLIAPVK         | 62d | 18 |
| FBgn0016724 | 957.96  | 72 | 2 | IVNHLEENVQLTETYK      | 62d | 18 |
| FBgn0016724 | 1069.04 | 82 | 2 | SGLSQGNIDAQLSDTPFGSNK | 62d | 18 |
| FBgn0016724 | 903.73  | 62 | 2 | SSTSLSEVQAGNGNVAER    | 62d | 18 |
| FBgn0016724 | 1063.16 | 80 | 3 | SVDKETLNQAASQLLPNAPK  | 62d | 18 |
| FBgn0016724 | 878.04  | 43 | 1 | TILSDLVDSTGDYVKK      | 62d | 18 |
| FBgn0016724 | 1162.74 | 66 | 3 | VQILDKNPIEITSEVQPNK   | 62d | 18 |
| FBgn0016724 | 843.47  | 63 | 1 | YQFTANVQPTSSSTIK      | 62d | 18 |
| FBgn0016724 | 626.19  | 56 | 3 | YSFNNEVSYK            | 62d | 18 |
| FBgn0016724 | 954.76  | 66 | 1 | AIGEIVKPINDAAQEVK     | 82d | 18 |
| FBgn0016724 | 599.78  | 55 | 1 | DSEYISENIK            | 82d | 18 |
| FBgn0016724 | 585.56  | 50 | 1 | EKPIIISSIAELLGDR      | 82d | 18 |
| FBgn0016724 | 698.16  | 65 | 3 | FDGALIHLIAPVK         | 82d | 18 |
| FBgn0016724 | 957.92  | 78 | 1 | IVNHLEENVQLTETYK      | 82d | 18 |
| FBgn0016724 | 757.85  | 62 | 2 | IVVNAAEGVTHEFK        | 82d | 18 |
| FBgn0016724 | 571.69  | 44 | 2 | MDASLGYGAEK           | 82d | 18 |
| FBgn0016724 | 842.11  | 66 | 1 | MLNQITSSLADTLFK       | 82d | 18 |
| FBgn0016724 | 748.34  | 47 | 1 | NYCQGPEIDAISK         | 82d | 18 |
| FBgn0016724 | 999.54  | 92 | 3 | QSDSETLLELAAFPHPNK    | 82d | 18 |
| FBgn0016724 | 1069.09 | 69 | 1 | SGLSQGNIDAQLSDTPFGSNK | 82d | 18 |
| FBgn0016724 | 903.78  | 85 | 2 | SSTSLSEVQAGNGNVAER    | 82d | 18 |
| FBgn0016724 | 1063.3  | 67 | 1 | SVDKETLNQAASQLLPNAPK  | 82d | 18 |
| FBgn0016724 | 813.62  | 62 | 1 | TILSDLVDSTGDYVKK      | 82d | 18 |
| FBgn0016724 | 843.34  | 55 | 2 | YQFTANVQPTSSSTIK      | 82d | 18 |
| FBgn0016724 | 980.9   | 84 | 1 | YQYHLDSFIITGNNEFK     | 82d | 18 |

|             |         |    |   |                       |      |    |
|-------------|---------|----|---|-----------------------|------|----|
| FBgn0016724 | 626.19  | 56 | 3 | YSFNNEVSYK            | 82d  | 18 |
| FBgn0016724 | 671.36  | 42 | 1 | AFQLALDYPFR           | 102d | 18 |
| FBgn0016724 | 524.1   | 39 | 1 | ANSPGTGSTVR           | 102d | 18 |
| FBgn0016724 | 697.95  | 58 | 1 | FDGALIHLIAPVK         | 102d | 18 |
| FBgn0016724 | 465.09  | 35 | 1 | GIAPQADEK             | 102d | 18 |
| FBgn0016724 | 958.03  | 43 | 1 | IVNHLEENVQLTETYK      | 102d | 18 |
| FBgn0016724 | 758.13  | 56 | 1 | IVVNAAEQVTHEFK        | 102d | 18 |
| FBgn0016724 | 999.69  | 83 | 1 | QSDSETLLELAAFPHPNK    | 102d | 18 |
| FBgn0016724 | 1069.23 | 78 | 2 | SGLSQGNIDAQLSDTPFGSNK | 102d | 18 |
| FBgn0016724 | 904.16  | 38 | 1 | SSTSLSEVQAGNGNVAER    | 102d | 18 |
| FBgn0016724 | 709.14  | 83 | 3 | SVDKETLNQAASQLLPNAPK  | 102d | 18 |
| FBgn0016724 | 877.78  | 47 | 1 | TILSDLVDSTGDYVKK      | 102d | 18 |
| FBgn0016724 | 1162.51 | 68 | 3 | VQILDKNPIEITSEVQPNsak | 102d | 18 |
| FBgn0016724 | 671.51  | 90 | 2 | AFQLALDYPFR           | 112d | 18 |
| FBgn0016724 | 954.31  | 40 | 1 | AIGEIVKPINDAAQEVik    | 112d | 18 |
| FBgn0016724 | 524.31  | 34 | 1 | ANSPGTGSTVR           | 112d | 18 |
| FBgn0016724 | 957.83  | 53 | 3 | IVNHLEENVQLTETYK      | 112d | 18 |
| FBgn0016724 | 635.84  | 67 | 8 | LTSESQHPQDK           | 112d | 18 |
| FBgn0016724 | 1155.69 | 41 | 1 | NDIVQELEADQSIAPIIDGIR | 112d | 18 |
| FBgn0016724 | 666.79  | 49 | 1 | QSDSETLLELAAFPHPNK    | 112d | 18 |
| FBgn0016724 | 1068.83 | 67 | 1 | SGLSQGNIDAQLSDTPFGSNK | 112d | 18 |
| FBgn0016724 | 765.54  | 39 | 1 | SSILNCLLNENWDVVFNKK   | 112d | 18 |
| FBgn0016724 | 1062.75 | 77 | 3 | SVDKETLNQAASQLLPNAPK  | 112d | 18 |
| FBgn0016724 | 973.07  | 37 | 1 | TFKPLDDSTYVVTALFK     | 112d | 18 |
| FBgn0016724 | 814.02  | 59 | 1 | TILSDLVDSTGDYVKK      | 112d | 18 |
| FBgn0016724 | 877.89  | 55 | 1 | TILSDLVDSTGDYVKK      | 112d | 18 |
| FBgn0016724 | 1162.53 | 90 | 2 | VQILDKNPIEITSEVQPNsak | 112d | 18 |
| FBgn0016724 | 843.52  | 68 | 1 | YQFTANVQPTSSTIK       | 112d | 18 |
| FBgn0016724 | 981.19  | 96 | 1 | YQYHLDSFIITGNNFk      | 112d | 18 |
| FBgn0016724 | 671.35  | 71 | 3 | AFQLALDYPFR           | 122d | 18 |
| FBgn0016724 | 955.07  | 51 | 1 | AIGEIVKPINDAAQEVik    | 122d | 18 |
| FBgn0016724 | 524.43  | 47 | 1 | ANSPGTGSTVR           | 122d | 18 |

|             |         |     |   |                       |      |    |
|-------------|---------|-----|---|-----------------------|------|----|
| FBgn0016724 | 696.88  | 65  | 3 | FDGALIHLIAPVK         | 122d | 18 |
| FBgn0016724 | 999.14  | 91  | 2 | QSDSETLLELAAFPHPNK    | 122d | 18 |
| FBgn0016724 | 1069.11 | 80  | 1 | SGLSQGNIDAQLSDTPFGSNK | 122d | 18 |
| FBgn0016724 | 1062.94 | 63  | 1 | SVDKETLNQAASQLLPNAPK  | 122d | 18 |
| FBgn0016724 | 877.99  | 62  | 1 | TILSDLVDSTGDYVKK      | 122d | 18 |
| FBgn0016724 | 1162.6  | 49  | 2 | VQILDKNPIEITSEVQPNSAK | 122d | 18 |
| FBgn0016724 | 843.62  | 59  | 3 | YQFTANVQPTSSTIK       | 122d | 18 |
| FBgn0016724 | 671.5   | 40  | 1 | AFQLALDYVFR           | 132d | 18 |
| FBgn0016724 | 637.11  | 45  | 1 | AIGEIVKPINDAAQEVK     | 132d | 18 |
| FBgn0016724 | 585.78  | 35  | 1 | EKPIIISSIAELGDR       | 132d | 18 |
| FBgn0016724 | 698.01  | 82  | 2 | FDGALIHLIAPVK         | 132d | 18 |
| FBgn0016724 | 842.16  | 60  | 1 | MLNQITSSLADTLFK       | 132d | 18 |
| FBgn0016724 | 999.5   | 102 | 3 | QSDSETLLELAAFPHPNK    | 132d | 18 |
| FBgn0016724 | 904.02  | 60  | 1 | SSTLSLSEVQAGNGNVAER   | 132d | 18 |
| FBgn0016724 | 1063.05 | 76  | 2 | SVDKETLNQAASQLLPNAPK  | 132d | 18 |
| FBgn0016724 | 877.95  | 61  | 1 | TILSDLVDSTGDYVKK      | 132d | 18 |
| FBgn0016724 | 1162.58 | 93  | 3 | VQILDKNPIEITSEVQPNSAK | 132d | 18 |
| FBgn0016724 | 843.64  | 69  | 2 | YQFTANVQPTSSTIK       | 132d | 18 |
| FBgn0016724 | 981.06  | 68  | 1 | YQYHLDSFIITGNVFK      | 132d | 18 |
| FBgn0016724 | 671.24  | 38  | 1 | AFQLALDYVFR           | 142d | 18 |
| FBgn0016724 | 955.18  | 48  | 1 | AIGEIVKPINDAAQEVK     | 142d | 18 |
| FBgn0016724 | 524.47  | 42  | 1 | ANSPGTGSTVR           | 142d | 18 |
| FBgn0016724 | 848.62  | 45  | 1 | ETLNQAASQLLPNAPK      | 142d | 18 |
| FBgn0016724 | 697.23  | 76  | 2 | FDGALIHLIAPVK         | 142d | 18 |
| FBgn0016724 | 1001.63 | 35  | 1 | HIFTFDGLNFAYPGNCK     | 142d | 18 |
| FBgn0016724 | 958.24  | 57  | 1 | IVNHLEINVQLTETYK      | 142d | 18 |
| FBgn0016724 | 757.79  | 61  | 2 | IVVNAAEVTHEFK         | 142d | 18 |
| FBgn0016724 | 556.4   | 36  | 1 | KVYLDGLFR             | 142d | 18 |
| FBgn0016724 | 735.75  | 37  | 1 | LNGNLVEYPQHLSGLHAWR   | 142d | 18 |
| FBgn0016724 | 1069.13 | 40  | 1 | SGLSQGNIDAQLSDTPFGSNK | 142d | 18 |
| FBgn0016724 | 708.9   | 88  | 2 | SVDKETLNQAASQLLPNAPK  | 142d | 18 |
| FBgn0016724 | 814.13  | 45  | 1 | TILSDLVDSTGDYVKK      | 142d | 18 |

|             |         |     |   |                       |      |    |
|-------------|---------|-----|---|-----------------------|------|----|
| FBgn0016724 | 1162.86 | 75  | 3 | VQILDKNPIEITSEVQPNSAK | 142d | 18 |
| FBgn0016724 | 981.07  | 42  | 1 | YQYHLDSFIITGNMFK      | 142d | 18 |
| FBgn0016724 | 671.35  | 64  | 5 | AFQLALDYPPFR          | 2d   | 28 |
| FBgn0016724 | 955.17  | 70  | 3 | AIGEIVKPINDAAQEVK     | 2d   | 28 |
| FBgn0016724 | 524.12  | 47  | 2 | ANSPGTGSTVR           | 2d   | 28 |
| FBgn0016724 | 918.63  | 56  | 1 | CAGPAGQHDFGDEFTVK     | 2d   | 28 |
| FBgn0016724 | 704.66  | 55  | 3 | DFGYPYEFELK           | 2d   | 28 |
| FBgn0016724 | 599.72  | 55  | 2 | DSEYISENIK            | 2d   | 28 |
| FBgn0016724 | 848.58  | 66  | 2 | ETLNQAASQLLPNAPK      | 2d   | 28 |
| FBgn0016724 | 697.81  | 75  | 3 | FDGALIHLIAPVK         | 2d   | 28 |
| FBgn0016724 | 566.42  | 50  | 1 | GLSLEGLVSEK           | 2d   | 28 |
| FBgn0016724 | 1001.11 | 47  | 2 | HIFTFDGLNFAYPGNCK     | 2d   | 28 |
| FBgn0016724 | 540.28  | 48  | 3 | ILDIYNSLK             | 2d   | 28 |
| FBgn0016724 | 517.21  | 47  | 3 | IPADGSLFGR            | 2d   | 28 |
| FBgn0016724 | 958.02  | 61  | 2 | IVNHLEIENVQLTETYK     | 2d   | 28 |
| FBgn0016724 | 757.76  | 73  | 3 | IVVNAAEVTHEFK         | 2d   | 28 |
| FBgn0016724 | 533.81  | 50  | 2 | LDGYEAR               | 2d   | 28 |
| FBgn0016724 | 664.39  | 56  | 2 | LIEVGNGVAAGGR         | 2d   | 28 |
| FBgn0016724 | 572     | 52  | 4 | MDASLGYGAEK           | 2d   | 28 |
| FBgn0016724 | 841.95  | 61  | 2 | MLNQITSSLADTLFK       | 2d   | 28 |
| FBgn0016724 | 1155.79 | 73  | 1 | NDIVQELEADQSIAPIIDGIR | 2d   | 28 |
| FBgn0016724 | 999.48  | 102 | 5 | QSDSETLLELAAPHPNK     | 2d   | 28 |
| FBgn0016724 | 749.32  | 37  | 1 | QYVASLPSFESIR         | 2d   | 28 |
| FBgn0016724 | 1068.68 | 86  | 1 | SGLSQGNIDAQLSDTPFGSNK | 2d   | 28 |
| FBgn0016724 | 785.88  | 38  | 1 | SLIFQRPETYTSK         | 2d   | 28 |
| FBgn0016724 | 904.04  | 76  | 2 | SSTSLSEVQAGNGNVAER    | 2d   | 28 |
| FBgn0016724 | 1062.69 | 94  | 5 | SVDKETLNQAASQLLPNAPK  | 2d   | 28 |
| FBgn0016724 | 813.74  | 46  | 2 | TILSDLVDSTGDYVK       | 2d   | 28 |
| FBgn0016724 | 877.82  | 73  | 4 | TILSDLVDSTGDYVKK      | 2d   | 28 |
| FBgn0016724 | 725.78  | 45  | 2 | VIGTPDKTNSDFR         | 2d   | 28 |
| FBgn0016724 | 1162.66 | 80  | 2 | VQILDKNPIEITSEVQPNSAK | 2d   | 28 |
| FBgn0016724 | 843.05  | 52  | 1 | YQFTANVQPTSSTIK       | 2d   | 28 |

|             |         |     |   |                       |     |    |
|-------------|---------|-----|---|-----------------------|-----|----|
| FBgn0016724 | 981     | 67  | 2 | YQYHLDSFIITGNMFK      | 2d  | 28 |
| FBgn0016724 | 626.18  | 53  | 3 | YSFNNEVSYK            | 2d  | 28 |
| FBgn0016724 | 671.07  | 64  | 3 | AFQLALDYPFR           | 12d | 28 |
| FBgn0016724 | 955.01  | 72  | 4 | AIGEIVKPINDAAQEVK     | 12d | 28 |
| FBgn0016724 | 877.96  | 41  | 2 | EKPIIISSIAELLGDR      | 12d | 28 |
| FBgn0016724 | 698.11  | 78  | 2 | FDGALIHLIAPVK         | 12d | 28 |
| FBgn0016724 | 566.8   | 56  | 1 | GLSLEGVLSEK           | 12d | 28 |
| FBgn0016724 | 540.52  | 46  | 2 | ILDIYNSLK             | 12d | 28 |
| FBgn0016724 | 957.74  | 69  | 3 | IVNHLEINVQLTETYK      | 12d | 28 |
| FBgn0016724 | 841.97  | 65  | 1 | MLNQITSSLADTLFK       | 12d | 28 |
| FBgn0016724 | 666.77  | 63  | 1 | QSDSETLLELAAFHPNK     | 12d | 28 |
| FBgn0016724 | 1069.07 | 86  | 1 | SGLSQGNIDAQLSDTPFGSNK | 12d | 28 |
| FBgn0016724 | 903.75  | 90  | 3 | SSTSLSEVQAGNGNVAER    | 12d | 28 |
| FBgn0016724 | 1063.03 | 112 | 3 | SVDKETLNQAASQLLPNAPK  | 12d | 28 |
| FBgn0016724 | 973.2   | 36  | 1 | TFKPLDDSTYVVTALFK     | 12d | 28 |
| FBgn0016724 | 814.15  | 64  | 3 | TILSDLVDSTGDYVK       | 12d | 28 |
| FBgn0016724 | 877.98  | 63  | 2 | TILSDLVDSTGDYVKK      | 12d | 28 |
| FBgn0016724 | 725.64  | 37  | 2 | VIGTPDKTNSDFR         | 12d | 28 |
| FBgn0016724 | 1162.57 | 86  | 3 | VQILDKNPIEITSEVQPNSAK | 12d | 28 |
| FBgn0016724 | 843.46  | 51  | 1 | YQFTANVQPTSSTIK       | 12d | 28 |
| FBgn0016724 | 981.07  | 78  | 2 | YQYHLDSFIITGNMFK      | 12d | 28 |
| FBgn0016724 | 626.26  | 53  | 3 | YSFNNEVSYK            | 12d | 28 |
| FBgn0016724 | 671.48  | 66  | 3 | AFQLALDYPFR           | 22d | 28 |
| FBgn0016724 | 955.05  | 58  | 1 | AIGEIVKPINDAAQEVK     | 22d | 28 |
| FBgn0016724 | 628.45  | 50  | 1 | EKPIIISSIAELLGDRK     | 22d | 28 |
| FBgn0016724 | 698.13  | 69  | 2 | FDGALIHLIAPVK         | 22d | 28 |
| FBgn0016724 | 660.68  | 47  | 1 | HAQDYSLEASAK          | 22d | 28 |
| FBgn0016724 | 540.26  | 44  | 2 | ILDIYNSLK             | 22d | 28 |
| FBgn0016724 | 958.09  | 62  | 2 | IVNHLEINVQLTETYK      | 22d | 28 |
| FBgn0016724 | 757.6   | 74  | 3 | IVVNAAEVTHEFK         | 22d | 28 |
| FBgn0016724 | 635.97  | 53  | 1 | LTSESQHPQDK           | 22d | 28 |
| FBgn0016724 | 842.17  | 62  | 1 | MLNQITSSLADTLFK       | 22d | 28 |



|             |         |    |   |                       |     |    |
|-------------|---------|----|---|-----------------------|-----|----|
| FBgn0016724 | 1155.61 | 65 | 2 | NDIVQELEADQSIAPIIDGIR | 22d | 28 |
| FBgn0016724 | 1062.84 | 74 | 1 | SVDKETLNQAASQLLPNAPK  | 22d | 28 |
| FBgn0016724 | 813.94  | 49 | 1 | TILSDLVDSTGDYVK       | 22d | 28 |
| FBgn0016724 | 877.98  | 54 | 1 | TILSDLVDSTGDYVKK      | 22d | 28 |
| FBgn0016724 | 1162.43 | 93 | 3 | VQILDKNPIEITSEVQPNSAK | 22d | 28 |
| FBgn0016724 | 843.29  | 54 | 3 | YQFTANVQPTSSTIK       | 22d | 28 |
| FBgn0016724 | 626.5   | 53 | 2 | YSFNNEVSYK            | 22d | 28 |
| FBgn0016724 | 671.16  | 69 | 3 | AFQLALDYPPFR          | 32d | 28 |
| FBgn0016724 | 725.81  | 54 | 2 | AGSLVENVEIQYK         | 32d | 28 |
| FBgn0016724 | 954.96  | 41 | 2 | AIGEIVKPINDAAQEVK     | 32d | 28 |
| FBgn0016724 | 524.33  | 52 | 2 | ANSPGTGSTVR           | 32d | 28 |
| FBgn0016724 | 878.1   | 54 | 1 | EKPIIISSIAELLGDR      | 32d | 28 |
| FBgn0016724 | 697.97  | 79 | 3 | FDGALIHLIAPVK         | 32d | 28 |
| FBgn0016724 | 567.04  | 60 | 2 | GLSLEGVLSEK           | 32d | 28 |
| FBgn0016724 | 540.44  | 42 | 1 | ILDIYNSLK             | 32d | 28 |
| FBgn0016724 | 957.82  | 78 | 3 | IVNHLEINVQLTETYK      | 32d | 28 |
| FBgn0016724 | 757.76  | 80 | 3 | IVVNAAEGVTHEFK        | 32d | 28 |
| FBgn0016724 | 556.15  | 37 | 1 | KVYLDGLFR             | 32d | 28 |
| FBgn0016724 | 842.13  | 67 | 2 | MLNQITSSLADTLFK       | 32d | 28 |
| FBgn0016724 | 666.82  | 41 | 1 | QSDSETLLELAAPHPNK     | 32d | 28 |
| FBgn0016724 | 1069.03 | 68 | 1 | SGLSQGNIDAQLSDTPFGSNK | 32d | 28 |
| FBgn0016724 | 1062.98 | 92 | 3 | SVDKETLNQAASQLLPNAPK  | 32d | 28 |
| FBgn0016724 | 813.87  | 41 | 1 | TILSDLVDSTGDYVK       | 32d | 28 |
| FBgn0016724 | 878.17  | 46 | 1 | TILSDLVDSTGDYVKK      | 32d | 28 |
| FBgn0016724 | 1162.52 | 47 | 1 | VQILDKNPIEITSEVQPNSAK | 32d | 28 |
| FBgn0016724 | 843.16  | 61 | 2 | YQFTANVQPTSSTIK       | 32d | 28 |
| FBgn0016724 | 626.35  | 55 | 3 | YSFNNEVSYK            | 32d | 28 |
| FBgn0016724 | 671.21  | 64 | 2 | AFQLALDYPPFR          | 36d | 28 |
| FBgn0016724 | 726.09  | 34 | 1 | AGSLVENVEIQYK         | 36d | 28 |
| FBgn0016724 | 954.84  | 67 | 4 | AIGEIVKPINDAAQEVK     | 36d | 28 |
| FBgn0016724 | 524.27  | 45 | 3 | ANSPGTGSTVR           | 36d | 28 |
| FBgn0016724 | 599.82  | 34 | 1 | DSEYISENIK            | 36d | 28 |

|             |         |     |   |                       |     |    |
|-------------|---------|-----|---|-----------------------|-----|----|
| FBgn0016724 | 778.76  | 49  | 1 | EGSYFEVADNLALK        | 36d | 28 |
| FBgn0016724 | 878.11  | 44  | 1 | EKPIIISSIAELLGDR      | 36d | 28 |
| FBgn0016724 | 628.54  | 36  | 1 | EKPIIISSIAELLGDRK     | 36d | 28 |
| FBgn0016724 | 848.43  | 37  | 1 | ETLNQAASQLLPNAPK      | 36d | 28 |
| FBgn0016724 | 698.13  | 84  | 3 | FDGALIHLIAPVK         | 36d | 28 |
| FBgn0016724 | 566.43  | 68  | 3 | GLSLEGVLSEK           | 36d | 28 |
| FBgn0016724 | 660.47  | 59  | 2 | HAQDYSLEASAK          | 36d | 28 |
| FBgn0016724 | 540.04  | 40  | 3 | ILDIYNSLK             | 36d | 28 |
| FBgn0016724 | 517.07  | 36  | 1 | IPADGSLFGR            | 36d | 28 |
| FBgn0016724 | 957.9   | 73  | 3 | IVNHLIENVQLTETYK      | 36d | 28 |
| FBgn0016724 | 505.66  | 62  | 2 | IVVNAAEGVTHEFK        | 36d | 28 |
| FBgn0016724 | 842.02  | 100 | 2 | MLNQITSSLADTLFK       | 36d | 28 |
| FBgn0016724 | 1155.57 | 40  | 2 | NDIVQELEADQSIAPIIDGIR | 36d | 28 |
| FBgn0016724 | 999.59  | 96  | 3 | QSDSETLLELAAFPHPNK    | 36d | 28 |
| FBgn0016724 | 749.64  | 34  | 1 | QYVASLPSFESIR         | 36d | 28 |
| FBgn0016724 | 690.18  | 77  | 3 | RQDFIDGTAEVK          | 36d | 28 |
| FBgn0016724 | 1069.01 | 92  | 2 | SGLSQGNIDAQLSDTPFGSNK | 36d | 28 |
| FBgn0016724 | 1063.31 | 86  | 2 | SVDKETLNQAASQLLPNAPK  | 36d | 28 |
| FBgn0016724 | 973.4   | 36  | 1 | TFKPLDDSTYVVTALFK     | 36d | 28 |
| FBgn0016724 | 813.89  | 65  | 2 | TILSDLVDSTGDYVK       | 36d | 28 |
| FBgn0016724 | 1162.52 | 80  | 2 | VQILDKNPIEITSEVQPNSAK | 36d | 28 |
| FBgn0016724 | 843.17  | 54  | 3 | YQFTANVQPTSSTIK       | 36d | 28 |
| FBgn0016724 | 626.19  | 53  | 2 | YSFNNEVSYK            | 36d | 28 |
| FBgn0016724 | 954.96  | 68  | 4 | AIGEIVKPINDAAQEVK     | 42d | 28 |
| FBgn0016724 | 524.38  | 61  | 4 | ANSPGTGSTVR           | 42d | 28 |
| FBgn0016724 | 704.82  | 35  | 1 | DFGYPYEFELK           | 42d | 28 |
| FBgn0016724 | 599.76  | 63  | 3 | DSEYISENIK            | 42d | 28 |
| FBgn0016724 | 778.76  | 64  | 2 | EGSYFEVADNLALK        | 42d | 28 |
| FBgn0016724 | 878.02  | 70  | 2 | EKPIIISSIAELLGDR      | 42d | 28 |
| FBgn0016724 | 942.06  | 58  | 2 | EKPIIISSIAELLGDRK     | 42d | 28 |
| FBgn0016724 | 566.63  | 49  | 1 | EQINSGLVSGK           | 42d | 28 |
| FBgn0016724 | 848.53  | 38  | 2 | ETLNQAASQLLPNAPK      | 42d | 28 |

|             |         |    |   |                       |     |    |
|-------------|---------|----|---|-----------------------|-----|----|
| FBgn0016724 | 465.65  | 89 | 3 | FDGALIHLIAPVK         | 42d | 28 |
| FBgn0016724 | 566.65  | 67 | 2 | GLSLEGVLSEK           | 42d | 28 |
| FBgn0016724 | 660.71  | 57 | 3 | HAQDYSLEASAK          | 42d | 28 |
| FBgn0016724 | 540.52  | 45 | 3 | ILDIYNSLK             | 42d | 28 |
| FBgn0016724 | 517.13  | 41 | 1 | IPADGSLFGR            | 42d | 28 |
| FBgn0016724 | 958.05  | 66 | 3 | IVNHLIENVQLTETYK      | 42d | 28 |
| FBgn0016724 | 757.97  | 69 | 3 | IVVNAAEGVTHEFK        | 42d | 28 |
| FBgn0016724 | 556.08  | 37 | 2 | KVYLDGLFR             | 42d | 28 |
| FBgn0016724 | 635.63  | 54 | 5 | LTSESQHPQDK           | 42d | 28 |
| FBgn0016724 | 999.71  | 72 | 3 | QSDSETLLELAAPHPNK     | 42d | 28 |
| FBgn0016724 | 690.2   | 66 | 2 | RQDFIDGTAEVK          | 42d | 28 |
| FBgn0016724 | 1068.9  | 88 | 2 | SGLSQGNIDAQLSDTPFGSNK | 42d | 28 |
| FBgn0016724 | 1063.03 | 73 | 3 | SVDKETLNQAASQLLPNAPK  | 42d | 28 |
| FBgn0016724 | 973.57  | 38 | 1 | TFKPLDDSTYVVTALFK     | 42d | 28 |
| FBgn0016724 | 813.98  | 91 | 3 | TILSDLVDSTGDYVK       | 42d | 28 |
| FBgn0016724 | 878.05  | 61 | 2 | TILSDLVDSTGDYVKK      | 42d | 28 |
| FBgn0016724 | 1162.59 | 76 | 1 | VQILDKNPIEITSEVQPNSAK | 42d | 28 |
| FBgn0016724 | 843.18  | 40 | 1 | YQFTANVQPTSSTIK       | 42d | 28 |
| FBgn0016724 | 626.25  | 51 | 2 | YSFNNEVSYK            | 42d | 28 |
| FBgn0016724 | 671.27  | 60 | 3 | AFQLALDYVFR           | 46d | 28 |
| FBgn0016724 | 725.63  | 62 | 1 | AGSLVENVEIQYK         | 46d | 28 |
| FBgn0016724 | 955     | 66 | 4 | AIGEIVKPINDAAQEVK     | 46d | 28 |
| FBgn0016724 | 524.33  | 47 | 2 | ANSPGTGSTVR           | 46d | 28 |
| FBgn0016724 | 778.81  | 46 | 1 | EGSYFEVADNLALK        | 46d | 28 |
| FBgn0016724 | 877.94  | 56 | 2 | EKPIIISSIAELGDR       | 46d | 28 |
| FBgn0016724 | 848.33  | 62 | 1 | ETLNQAASQLLPNAPK      | 46d | 28 |
| FBgn0016724 | 698.14  | 75 | 2 | FDGALIHLIAPVK         | 46d | 28 |
| FBgn0016724 | 623.59  | 46 | 2 | GIHTQEAFSQK           | 46d | 28 |
| FBgn0016724 | 566.78  | 48 | 2 | GLSLEGVLSEK           | 46d | 28 |
| FBgn0016724 | 660.58  | 52 | 3 | HAQDYSLEASAK          | 46d | 28 |
| FBgn0016724 | 647.06  | 52 | 1 | HIIYIVGDFSK           | 46d | 28 |
| FBgn0016724 | 540.39  | 40 | 2 | ILDIYNSLK             | 46d | 28 |

|             |         |    |   |                       |     |    |
|-------------|---------|----|---|-----------------------|-----|----|
| FBgn0016724 | 517.31  | 48 | 2 | IPADGSLFGR            | 46d | 28 |
| FBgn0016724 | 957.97  | 85 | 3 | IVNHLIENVQLTETYK      | 46d | 28 |
| FBgn0016724 | 999.36  | 57 | 2 | QSDSETLLELAAFPHPNK    | 46d | 28 |
| FBgn0016724 | 690.31  | 76 | 3 | RQDFIDGTAEVK          | 46d | 28 |
| FBgn0016724 | 1069.11 | 91 | 3 | SGLSQGNIDAQLSDTPFGSNK | 46d | 28 |
| FBgn0016724 | 1063.21 | 89 | 3 | SVDKETLNQAASQLLPNAPK  | 46d | 28 |
| FBgn0016724 | 973.77  | 39 | 1 | TFKPLDDSTYVVTALFK     | 46d | 28 |
| FBgn0016724 | 877.81  | 54 | 1 | TILSDLVDSTGDYVKK      | 46d | 28 |
| FBgn0016724 | 1162.45 | 85 | 3 | VQILDKNPIEITSEVQPSAK  | 46d | 28 |
| FBgn0016724 | 843.24  | 55 | 3 | YQFTANVQPTSSTIK       | 46d | 28 |
| FBgn0016724 | 626.23  | 53 | 3 | YSFNNEVSYK            | 46d | 28 |
| FBgn0016724 | 671.47  | 59 | 2 | AFQLALDYPPFR          | 50d | 28 |
| FBgn0016724 | 524.12  | 48 | 1 | ANSPGTGSTVR           | 50d | 28 |
| FBgn0016724 | 599.56  | 38 | 2 | DSEYISENIK            | 50d | 28 |
| FBgn0016724 | 878.13  | 68 | 1 | EKPIIISSIAELLGDR      | 50d | 28 |
| FBgn0016724 | 697.83  | 75 | 3 | FDGALIHLIAPVK         | 50d | 28 |
| FBgn0016724 | 566.79  | 53 | 1 | GLSLEGLVSEK           | 50d | 28 |
| FBgn0016724 | 957.9   | 84 | 2 | IVNHLIENVQLTETYK      | 50d | 28 |
| FBgn0016724 | 758.07  | 59 | 2 | IVVNAAEGVTHEFK        | 50d | 28 |
| FBgn0016724 | 841.99  | 39 | 1 | MLNQITSSLADTLFK       | 50d | 28 |
| FBgn0016724 | 1155.84 | 70 | 2 | NDIVQELEADQSIAPIIDGIR | 50d | 28 |
| FBgn0016724 | 748.17  | 60 | 1 | NYCQGPEIDAISK         | 50d | 28 |
| FBgn0016724 | 999.59  | 95 | 3 | QSDSETLLELAAFPHPNK    | 50d | 28 |
| FBgn0016724 | 749.49  | 34 | 1 | QYVASLPSFESIR         | 50d | 28 |
| FBgn0016724 | 1063.03 | 96 | 3 | SVDKETLNQAASQLLPNAPK  | 50d | 28 |
| FBgn0016724 | 813.77  | 69 | 3 | TILSDLVDSTGDYVK       | 50d | 28 |
| FBgn0016724 | 843.38  | 50 | 4 | YQFTANVQPTSSTIK       | 50d | 28 |
| FBgn0016724 | 626.4   | 51 | 3 | YSFNNEVSYK            | 50d | 28 |
| FBgn0016724 | 671.16  | 72 | 3 | AFQLALDYPPFR          | 52d | 28 |
| FBgn0016724 | 955.27  | 60 | 3 | AIGEIVKPINDAAQEVK     | 52d | 28 |
| FBgn0016724 | 524.34  | 37 | 1 | ANSPGTGSTVR           | 52d | 28 |
| FBgn0016724 | 918.68  | 56 | 3 | CAGPAGQHDFGDEFTVK     | 52d | 28 |

|             |         |    |   |                       |     |    |
|-------------|---------|----|---|-----------------------|-----|----|
| FBgn0016724 | 599.66  | 61 | 3 | DSEYISENIK            | 52d | 28 |
| FBgn0016724 | 878.13  | 69 | 3 | EKPIIISSIAELLGDR      | 52d | 28 |
| FBgn0016724 | 942.01  | 38 | 1 | EKPIIISSIAELLGDRK     | 52d | 28 |
| FBgn0016724 | 698.03  | 82 | 3 | FDGALIHLIAPVK         | 52d | 28 |
| FBgn0016724 | 566.8   | 69 | 2 | GLSLEGVLSEK           | 52d | 28 |
| FBgn0016724 | 540.47  | 37 | 1 | ILDIYNSLK             | 52d | 28 |
| FBgn0016724 | 957.94  | 72 | 3 | IVNHLIENVQLTETYK      | 52d | 28 |
| FBgn0016724 | 757.66  | 73 | 3 | IVVNAAEQVTHEFK        | 52d | 28 |
| FBgn0016724 | 635.98  | 54 | 2 | LTSESQHPQDK           | 52d | 28 |
| FBgn0016724 | 842     | 62 | 1 | MLNQITSSLADTLFK       | 52d | 28 |
| FBgn0016724 | 1155.83 | 64 | 1 | NDIVQELEADQSIAPIIDGIR | 52d | 28 |
| FBgn0016724 | 748.31  | 47 | 1 | NYCQGPEIDAISK         | 52d | 28 |
| FBgn0016724 | 999.57  | 81 | 2 | QSDSETLLELAAPHPNK     | 52d | 28 |
| FBgn0016724 | 749.55  | 42 | 2 | QYVASLPSFESIR         | 52d | 28 |
| FBgn0016724 | 872.17  | 81 | 2 | SFCDNCVEQIITEK        | 52d | 28 |
| FBgn0016724 | 1069.17 | 63 | 2 | SGLSQGNIDAQLSDTPFGSNK | 52d | 28 |
| FBgn0016724 | 903.92  | 85 | 1 | SSTSLSEVQAGNGNVAER    | 52d | 28 |
| FBgn0016724 | 1062.92 | 87 | 2 | SVDKETLNQAASQLLPNAPK  | 52d | 28 |
| FBgn0016724 | 814.15  | 57 | 1 | TILSDLVDSTGDYVK       | 52d | 28 |
| FBgn0016724 | 878.05  | 69 | 1 | TILSDLVDSTGDYVKK      | 52d | 28 |
| FBgn0016724 | 843.27  | 44 | 1 | YQFTANVQPTSSTIK       | 52d | 28 |
| FBgn0016724 | 626.19  | 53 | 3 | YSFNNEVSYK            | 52d | 28 |
| FBgn0016724 | 671.21  | 69 | 3 | AFQLALDYPFR           | 56d | 28 |
| FBgn0016724 | 955.13  | 74 | 2 | AIGEIVKPINDAAQEVK     | 56d | 28 |
| FBgn0016724 | 524.32  | 45 | 2 | ANSPGTGSTVR           | 56d | 28 |
| FBgn0016724 | 704.86  | 47 | 1 | DFGYPYEFELK           | 56d | 28 |
| FBgn0016724 | 779.01  | 49 | 1 | EGSYFEVADNLALK        | 56d | 28 |
| FBgn0016724 | 585.83  | 59 | 2 | EKPIIISSIAELLGDR      | 56d | 28 |
| FBgn0016724 | 628.49  | 49 | 2 | EKPIIISSIAELLGDRK     | 56d | 28 |
| FBgn0016724 | 848.61  | 48 | 1 | ETLNQAASQLLPNAPK      | 56d | 28 |
| FBgn0016724 | 698.1   | 79 | 3 | FDGALIHLIAPVK         | 56d | 28 |
| FBgn0016724 | 1001.71 | 42 | 1 | HIFTFDGLNFAYPGNCK     | 56d | 28 |

|             |         |    |   |                                 |      |    |
|-------------|---------|----|---|---------------------------------|------|----|
| FBgn0016724 | 958     | 52 | 1 | IVNHLEINVQLTETYK                | 56d  | 28 |
| FBgn0016724 | 758.09  | 75 | 3 | IVVNAAEVTHEFK                   | 56d  | 28 |
| FBgn0016724 | 841.86  | 87 | 4 | MLNQITSSLADTLFK                 | 56d  | 28 |
| FBgn0016724 | 1155.68 | 82 | 1 | NDIVQELEADQSIAPIIDGIR           | 56d  | 28 |
| FBgn0016724 | 999.55  | 78 | 2 | QSDSETLLELAAFPHPNK              | 56d  | 28 |
| FBgn0016724 | 690.23  | 38 | 1 | RQDFIDGTAEVK                    | 56d  | 28 |
| FBgn0016724 | 1069.13 | 66 | 3 | SGLSQGNIDAQLSDTPFGSNK           | 56d  | 28 |
| FBgn0016724 | 1063.04 | 80 | 2 | SVDKETLNQAASQLLPNAPK            | 56d  | 28 |
| FBgn0016724 | 973.51  | 39 | 2 | TFKPLDDSTYVVTALFK               | 56d  | 28 |
| FBgn0016724 | 814.14  | 60 | 1 | TILSDLVDSTGDYVK                 | 56d  | 28 |
| FBgn0016724 | 877.38  | 40 | 1 | TILSDLVDSTGDYVKK                | 56d  | 28 |
| FBgn0016724 | 843.3   | 44 | 1 | YQFTANVQPTSSTIK                 | 56d  | 28 |
| FBgn0016724 | 981.17  | 80 | 4 | YQYHLDSFIITGNFK                 | 56d  | 28 |
| FBgn0016920 | 331.32  | 37 | 1 | SGLGSIK                         | 62d  | 18 |
| FBgn0016940 | 1152.61 | 64 | 2 | YFILPDSLPLETLLIDDTPK            | 2d   | 18 |
| FBgn0016940 | 1152.87 | 49 | 1 | YFILPDSLPLETLLIDDTPK            | 42d  | 18 |
| FBgn0016940 | 1152.82 | 62 | 1 | YFILPDSLPLETLLIDDTPK            | 62d  | 18 |
| FBgn0016940 | 1152.84 | 50 | 1 | YFILPDSLPLETLLIDDTPK            | 2d   | 28 |
| FBgn0016940 | 1152.57 | 55 | 2 | YFILPDSLPLETLLIDDTPK            | 12d  | 28 |
| FBgn0016976 | 1328.41 | 63 | 2 | LDNPFAVPTAVPNIQAAVPLPATPIK      | 2d   | 18 |
| FBgn0016976 | 1327.53 | 44 | 2 | LDNPFAVPTAVPNIQAAVPLPATPIK      | 22d  | 18 |
| FBgn0016976 | 1328.13 | 58 | 1 | LDNPFAVPTAVPNIQAAVPLPATPIK      | 42d  | 18 |
| FBgn0016976 | 1109.21 | 81 | 3 | TLVTDVLDVQSDAQELGLGDK           | 42d  | 18 |
| FBgn0016976 | 1087.3  | 57 | 1 | ILGAVDTLQESLIEVTSGQAK           | 62d  | 18 |
| FBgn0016976 | 1328.44 | 62 | 2 | LDNPFAVPTAVPNIQAAVPLPATPIK      | 62d  | 18 |
| FBgn0016976 | 1052.18 | 74 | 1 | SVGFLVPASDLLGAGNELGASK          | 62d  | 18 |
| FBgn0016976 | 1328.37 | 53 | 1 | LDNPFAVPTAVPNIQAAVPLPATPIK      | 82d  | 18 |
| FBgn0016976 | 1328.23 | 48 | 1 | LDNPFAVPTAVPNIQAAVPLPATPIK      | 102d | 18 |
| FBgn0016976 | 1328.44 | 39 | 1 | LDNPFAVPTAVPNIQAAVPLPATPIK      | 122d | 18 |
| FBgn0016976 | 876.57  | 37 | 1 | LGLPVEHAPQSSQLFK                | 142d | 18 |
| FBgn0016976 | 1142.32 | 51 | 2 | DEPVFTSLLIRPDESTHDITSQPQAATGLER | 2d   | 28 |
| FBgn0016976 | 1052.12 | 37 | 1 | SVGFLVPASDLLGAGNELGASK          | 2d   | 28 |

|             |         |    |   |                            |      |    |
|-------------|---------|----|---|----------------------------|------|----|
| FBgn0016976 | 1328.22 | 68 | 3 | LDNPFAVPTAVPNIQAAVPLPATPIK | 12d  | 28 |
| FBgn0016976 | 1328.35 | 59 | 1 | LDNPFAVPTAVPNIQAAVPLPATPIK | 32d  | 28 |
| FBgn0016976 | 1109.24 | 73 | 1 | TLVTDVLDVQSDAQELGLGDK      | 32d  | 28 |
| FBgn0016976 | 1328.42 | 73 | 2 | LDNPFAVPTAVPNIQAAVPLPATPIK | 36d  | 28 |
| FBgn0016976 | 1327.95 | 53 | 1 | LDNPFAVPTAVPNIQAAVPLPATPIK | 46d  | 28 |
| FBgn0016976 | 1328.32 | 76 | 2 | LDNPFAVPTAVPNIQAAVPLPATPIK | 52d  | 28 |
| FBgn0017539 | 811.31  | 63 | 3 | TIAELNKPAPATLK             | 2d   | 18 |
| FBgn0017539 | 569.39  | 86 | 3 | AAFGLVAEGFR                | 42d  | 18 |
| FBgn0017539 | 900.31  | 46 | 2 | EDEYDFSKPLDGQQK            | 42d  | 18 |
| FBgn0017539 | 587.83  | 68 | 1 | GQVITIDKDGK                | 62d  | 18 |
| FBgn0017539 | 754.66  | 96 | 1 | GVLALNLEDGTLHR             | 62d  | 18 |
| FBgn0017539 | 811.44  | 74 | 1 | TIAELNKPAPATLK             | 62d  | 18 |
| FBgn0017539 | 900.21  | 67 | 3 | EDEYDFSKPLDGQQK            | 82d  | 18 |
| FBgn0017539 | 659.76  | 57 | 3 | ENAGEASVANLDK              | 82d  | 18 |
| FBgn0017539 | 755.05  | 78 | 1 | GVLALNLEDGTLHR             | 82d  | 18 |
| FBgn0017539 | 811.68  | 71 | 4 | TIAELNKPAPATLK             | 82d  | 18 |
| FBgn0017539 | 569.87  | 79 | 2 | AAFGLVAEGFR                | 102d | 18 |
| FBgn0017539 | 811.55  | 47 | 2 | TIAELNKPAPATLK             | 102d | 18 |
| FBgn0017539 | 569.7   | 55 | 2 | AAFGLVAEGFR                | 112d | 18 |
| FBgn0017539 | 755.01  | 82 | 2 | GVLALNLEDGTLHR             | 112d | 18 |
| FBgn0017539 | 569.6   | 82 | 2 | AAFGLVAEGFR                | 122d | 18 |
| FBgn0017539 | 1121.74 | 55 | 1 | DVIVPGLYAAGEAASSSVHGANR    | 122d | 18 |
| FBgn0017539 | 900.29  | 52 | 2 | EDEYDFSKPLDGQQK            | 122d | 18 |
| FBgn0017539 | 587.86  | 55 | 1 | GQVITIDKDGK                | 122d | 18 |
| FBgn0017539 | 811.62  | 59 | 2 | TIAELNKPAPATLK             | 122d | 18 |
| FBgn0017539 | 569.84  | 75 | 1 | AAFGLVAEGFR                | 142d | 18 |
| FBgn0017539 | 811.49  | 63 | 1 | TIAELNKPAPATLK             | 142d | 18 |
| FBgn0017539 | 578.97  | 49 | 3 | DGPILQDGVNK                | 2d   | 28 |
| FBgn0017539 | 659.87  | 48 | 3 | ENAGEASVANLDK              | 2d   | 28 |
| FBgn0017539 | 587.75  | 57 | 1 | GQVITIDKDGK                | 2d   | 28 |
| FBgn0017539 | 754.75  | 44 | 1 | GVLALNLEDGTLHR             | 2d   | 28 |
| FBgn0017539 | 811.37  | 66 | 4 | TIAELNKPAPATLK             | 2d   | 28 |

|             |         |    |   |                                       |      |    |
|-------------|---------|----|---|---------------------------------------|------|----|
| FBgn0017539 | 569.7   | 94 | 3 | AAFGLVAEGFR                           | 12d  | 28 |
| FBgn0017539 | 578.71  | 48 | 1 | DGPILQDGVNK                           | 12d  | 28 |
| FBgn0017539 | 900.4   | 48 | 2 | EDEYDFSKPLDGQQK                       | 12d  | 28 |
| FBgn0017539 | 811.58  | 61 | 3 | TIAELNKPAPATLK                        | 12d  | 28 |
| FBgn0017539 | 569.55  | 63 | 1 | AAFGLVAEGFR                           | 22d  | 28 |
| FBgn0017539 | 811.35  | 35 | 1 | TIAELNKPAPATLK                        | 22d  | 28 |
| FBgn0017539 | 569.71  | 54 | 1 | AAFGLVAEGFR                           | 32d  | 28 |
| FBgn0017539 | 1028.11 | 34 | 1 | NVIDTTLDNEVSTVPPAIR                   | 32d  | 28 |
| FBgn0017539 | 569.46  | 63 | 1 | AAFGLVAEGFR                           | 36d  | 28 |
| FBgn0017539 | 600.76  | 38 | 1 | EDEYDFSKPLDGQQK                       | 36d  | 28 |
| FBgn0017539 | 570.01  | 63 | 2 | AAFGLVAEGFR                           | 42d  | 28 |
| FBgn0017539 | 900.24  | 63 | 3 | EDEYDFSKPLDGQQK                       | 42d  | 28 |
| FBgn0017539 | 811.41  | 68 | 1 | TIAELNKPAPATLK                        | 42d  | 28 |
| FBgn0017539 | 569.69  | 74 | 1 | AAFGLVAEGFR                           | 46d  | 28 |
| FBgn0017539 | 900.23  | 55 | 1 | EDEYDFSKPLDGQQK                       | 46d  | 28 |
| FBgn0017539 | 578.92  | 53 | 1 | DGPILQDGVNK                           | 50d  | 28 |
| FBgn0017539 | 900.33  | 46 | 2 | EDEYDFSKPLDGQQK                       | 50d  | 28 |
| FBgn0017539 | 811.35  | 66 | 3 | TIAELNKPAPATLK                        | 50d  | 28 |
| FBgn0017539 | 899.94  | 42 | 1 | EDEYDFSKPLDGQQK                       | 52d  | 28 |
| FBgn0017539 | 811.25  | 70 | 3 | TIAELNKPAPATLK                        | 52d  | 28 |
| FBgn0017545 | 1407.61 | 51 | 1 | SVEAVVSSEGAVIDRPEGYEPPVQEA            | 2d   | 18 |
| FBgn0017545 | 1407.56 | 44 | 1 | SVEAVVSSEGAVIDRPEGYEPPVQEA            | 22d  | 18 |
| FBgn0017545 | 1407.76 | 43 | 1 | SVEAVVSSEGAVIDRPEGYEPPVQEA            | 102d | 18 |
| FBgn0017545 | 1407.9  | 37 | 1 | SVEAVVSSEGAVIDRPEGYEPPVQEA            | 132d | 18 |
| FBgn0017545 | 804.44  | 42 | 1 | MTDIITNEVSGADLK                       | 2d   | 28 |
| FBgn0017545 | 1407.78 | 46 | 3 | SVEAVVSSEGAVIDRPEGYEPPVQEA            | 2d   | 28 |
| FBgn0017545 | 1407.56 | 62 | 2 | SVEAVVSSEGAVIDRPEGYEPPVQEA            | 12d  | 28 |
| FBgn0017545 | 1407.8  | 42 | 1 | SVEAVVSSEGAVIDRPEGYEPPVQEA            | 42d  | 28 |
| FBgn0017565 | 1766.69 | 49 | 1 | APEAAGAADSVGATTSVAPIAEDEEDVDDTGVDEK   | 2d   | 18 |
| FBgn0017565 | 789.79  | 44 | 3 | NPHSDTYIVFGEAK                        | 2d   | 18 |
| FBgn0017565 | 1269.89 | 68 | 1 | FKAPEAAGAADSVGATTSVAPIAEDEEDVDDTGVDEK | 2d   | 28 |
| FBgn0017565 | 801.31  | 88 | 1 | IEDLSQQAQVAAAEK                       | 2d   | 28 |



|             |         |     |   |                                     |      |    |
|-------------|---------|-----|---|-------------------------------------|------|----|
| FBgn0017565 | 789.92  | 52  | 2 | NPHSDTYIVFGEAK                      | 2d   | 28 |
| FBgn0017565 | 582.73  | 48  | 2 | SEAAPSTSAEAKPEDVR                   | 2d   | 28 |
| FBgn0017565 | 1766.68 | 43  | 3 | APEAAGAADSVGATTSVAPIAEDEEDVDDTGVDEK | 12d  | 28 |
| FBgn0017565 | 1766.85 | 38  | 1 | APEAAGAADSVGATTSVAPIAEDEEDVDDTGVDEK | 52d  | 28 |
| FBgn0017566 | 1065.12 | 61  | 1 | ALSEVVGKPLPYDNLDEL                  | 2d   | 18 |
| FBgn0017566 | 973     | 60  | 2 | IDLSYDHENLGADAALVK                  | 2d   | 18 |
| FBgn0017566 | 705.37  | 35  | 1 | KPAIIIIGADLLER                      | 2d   | 18 |
| FBgn0017566 | 828.99  | 36  | 1 | LGQLEPAGDAGAAGTISK                  | 2d   | 18 |
| FBgn0017566 | 796.33  | 63  | 1 | ENEDVNEEWLADK                       | 22d  | 18 |
| FBgn0017566 | 972.95  | 74  | 2 | IDLSYDHENLGADAALVK                  | 22d  | 18 |
| FBgn0017566 | 1091.74 | 128 | 1 | AAGGQIAGISGQLADLEAQVALK             | 62d  | 18 |
| FBgn0017566 | 820.78  | 49  | 1 | AYVHNELQIASIGPK                     | 62d  | 18 |
| FBgn0017566 | 972.86  | 63  | 2 | IDLSYDHENLGADAALVK                  | 62d  | 18 |
| FBgn0017566 | 1091.72 | 88  | 1 | AAGGQIAGISGQLADLEAQVALK             | 82d  | 18 |
| FBgn0017566 | 973.21  | 62  | 1 | IDLSYDHENLGADAALVK                  | 82d  | 18 |
| FBgn0017566 | 828.91  | 55  | 1 | LGQLEPAGDAGAAGTISK                  | 82d  | 18 |
| FBgn0017566 | 1091.76 | 82  | 1 | AAGGQIAGISGQLADLEAQVALK             | 102d | 18 |
| FBgn0017566 | 1065.27 | 49  | 1 | ALSEVVGKPLPYDNLDEL                  | 102d | 18 |
| FBgn0017566 | 973.07  | 46  | 2 | IDLSYDHENLGADAALVK                  | 102d | 18 |
| FBgn0017566 | 805.63  | 45  | 1 | FASEIAGVDDLGTTR                     | 122d | 18 |
| FBgn0017566 | 1065.3  | 60  | 1 | ALSEVVGKPLPYDNLDEL                  | 142d | 18 |
| FBgn0017566 | 972.88  | 51  | 1 | IDLSYDHENLGADAALVK                  | 2d   | 28 |
| FBgn0017566 | 828.9   | 77  | 2 | LGQLEPAGDAGAAGTISK                  | 2d   | 28 |
| FBgn0017566 | 1091.71 | 76  | 2 | AAGGQIAGISGQLADLEAQVALK             | 12d  | 28 |
| FBgn0017566 | 1065.03 | 73  | 2 | ALSEVVGKPLPYDNLDEL                  | 12d  | 28 |
| FBgn0017566 | 820.96  | 84  | 2 | AYVHNELQIASIGPK                     | 12d  | 28 |
| FBgn0017566 | 972.99  | 57  | 3 | IDLSYDHENLGADAALVK                  | 12d  | 28 |
| FBgn0017566 | 828.76  | 83  | 2 | LGQLEPAGDAGAAGTISK                  | 12d  | 28 |
| FBgn0017566 | 805.51  | 67  | 1 | FASEIAGVDDLGTTR                     | 22d  | 28 |
| FBgn0017566 | 973     | 48  | 2 | IDLSYDHENLGADAALVK                  | 22d  | 28 |
| FBgn0017566 | 1091.77 | 82  | 1 | AAGGQIAGISGQLADLEAQVALK             | 32d  | 28 |
| FBgn0017566 | 796.4   | 73  | 2 | ENEDVNEEWLADK                       | 32d  | 28 |

|             |         |    |   |                            |      |    |
|-------------|---------|----|---|----------------------------|------|----|
| FBgn0017566 | 805.38  | 50 | 1 | FASEIAGVDDLGTTR            | 32d  | 28 |
| FBgn0017566 | 828.84  | 75 | 1 | LGQLEPAGDAGAAGTISK         | 32d  | 28 |
| FBgn0017566 | 828.81  | 73 | 1 | LGQLEPAGDAGAAGTISK         | 36d  | 28 |
| FBgn0017566 | 796.27  | 99 | 2 | ENEDVNEEWLADK              | 42d  | 28 |
| FBgn0017566 | 1091.65 | 54 | 1 | AAGGQIAGISGQLADLEAQVALK    | 52d  | 28 |
| FBgn0017579 | 612.41  | 62 | 2 | VLVDGPLTGVP                | 2d   | 28 |
| FBgn0019624 | 538.04  | 44 | 2 | EGIDGWEIR                  | 2d   | 18 |
| FBgn0019624 | 1441.91 | 36 | 1 | ITPTLQELGIPTIEELGYDKPELALK | 2d   | 18 |
| FBgn0019624 | 858.64  | 96 | 2 | KGMNDLLGMDLVSPK            | 2d   | 18 |
| FBgn0019624 | 538.38  | 58 | 3 | EGIDGWEIR                  | 22d  | 18 |
| FBgn0019624 | 794.39  | 59 | 1 | GMNDLLGMDLVSPK             | 22d  | 18 |
| FBgn0019624 | 1441.72 | 49 | 1 | ITPTLQELGIPTIEELGYDKPELALK | 22d  | 18 |
| FBgn0019624 | 858.62  | 74 | 1 | KGMNDLLGMDLVSPK            | 22d  | 18 |
| FBgn0019624 | 538.19  | 44 | 1 | EGIDGWEIR                  | 42d  | 18 |
| FBgn0019624 | 794.35  | 68 | 3 | GMNDLLGMDLVSPK             | 42d  | 18 |
| FBgn0019624 | 1441.96 | 35 | 1 | ITPTLQELGIPTIEELGYDKPELALK | 42d  | 18 |
| FBgn0019624 | 858.61  | 81 | 1 | KGMNDLLGMDLVSPK            | 42d  | 18 |
| FBgn0019624 | 571.48  | 42 | 2 | RVNDIALAIR                 | 42d  | 18 |
| FBgn0019624 | 538.11  | 51 | 3 | EGIDGWEIR                  | 62d  | 18 |
| FBgn0019624 | 1441.52 | 43 | 2 | ITPTLQELGIPTIEELGYDKPELALK | 62d  | 18 |
| FBgn0019624 | 493.22  | 57 | 1 | VNDIALAIR                  | 62d  | 18 |
| FBgn0019624 | 538.29  | 42 | 3 | EGIDGWEIR                  | 82d  | 18 |
| FBgn0019624 | 1441.96 | 37 | 1 | ITPTLQELGIPTIEELGYDKPELALK | 82d  | 18 |
| FBgn0019624 | 858.54  | 52 | 1 | KGMNDLLGMDLVSPK            | 82d  | 18 |
| FBgn0019624 | 538.01  | 49 | 2 | EGIDGWEIR                  | 102d | 18 |
| FBgn0019624 | 858.39  | 41 | 1 | KGMNDLLGMDLVSPK            | 102d | 18 |
| FBgn0019624 | 538.02  | 47 | 3 | EGIDGWEIR                  | 112d | 18 |
| FBgn0019624 | 961.15  | 45 | 3 | ITPTLQELGIPTIEELGYDKPELALK | 112d | 18 |
| FBgn0019624 | 858.53  | 61 | 1 | KGMNDLLGMDLVSPK            | 112d | 18 |
| FBgn0019624 | 537.22  | 43 | 2 | EGIDGWEIR                  | 122d | 18 |
| FBgn0019624 | 1441.91 | 35 | 1 | ITPTLQELGIPTIEELGYDKPELALK | 122d | 18 |
| FBgn0019624 | 538.51  | 42 | 3 | EGIDGWEIR                  | 132d | 18 |

|             |         |    |   |                            |      |    |
|-------------|---------|----|---|----------------------------|------|----|
| FBgn0019624 | 538.1   | 41 | 2 | EGIDGWEIR                  | 142d | 18 |
| FBgn0019624 | 538.02  | 55 | 3 | EGIDGWEIR                  | 2d   | 28 |
| FBgn0019624 | 794.28  | 56 | 1 | GMNDLLGMDLVSPK             | 2d   | 28 |
| FBgn0019624 | 858.5   | 77 | 1 | KGMNDLLGMDLVSPK            | 2d   | 28 |
| FBgn0019624 | 538.18  | 43 | 1 | EGIDGWEIR                  | 12d  | 28 |
| FBgn0019624 | 1441.71 | 43 | 1 | ITPTLQELGIPTIEELGYDKPELALK | 12d  | 28 |
| FBgn0019624 | 858.58  | 81 | 2 | KGMNDLLGMDLVSPK            | 12d  | 28 |
| FBgn0019624 | 493.23  | 79 | 1 | VNDIALAIR                  | 12d  | 28 |
| FBgn0019624 | 537.92  | 58 | 3 | EGIDGWEIR                  | 22d  | 28 |
| FBgn0019624 | 572.65  | 57 | 2 | KGMNDLLGMDLVSPK            | 22d  | 28 |
| FBgn0019624 | 537.66  | 52 | 3 | EGIDGWEIR                  | 32d  | 28 |
| FBgn0019624 | 794.39  | 66 | 3 | GMNDLLGMDLVSPK             | 32d  | 28 |
| FBgn0019624 | 961.42  | 52 | 2 | ITPTLQELGIPTIEELGYDKPELALK | 32d  | 28 |
| FBgn0019624 | 858.4   | 74 | 1 | KGMNDLLGMDLVSPK            | 32d  | 28 |
| FBgn0019624 | 538.26  | 46 | 3 | EGIDGWEIR                  | 36d  | 28 |
| FBgn0019624 | 794.38  | 92 | 3 | GMNDLLGMDLVSPK             | 36d  | 28 |
| FBgn0019624 | 858.49  | 57 | 1 | KGMNDLLGMDLVSPK            | 36d  | 28 |
| FBgn0019624 | 538.11  | 54 | 3 | EGIDGWEIR                  | 42d  | 28 |
| FBgn0019624 | 961.67  | 37 | 2 | ITPTLQELGIPTIEELGYDKPELALK | 42d  | 28 |
| FBgn0019624 | 858.56  | 74 | 2 | KGMNDLLGMDLVSPK            | 42d  | 28 |
| FBgn0019624 | 493.15  | 62 | 1 | VNDIALAIR                  | 42d  | 28 |
| FBgn0019624 | 538.24  | 51 | 2 | EGIDGWEIR                  | 46d  | 28 |
| FBgn0019624 | 1441.94 | 45 | 1 | ITPTLQELGIPTIEELGYDKPELALK | 46d  | 28 |
| FBgn0019624 | 858.47  | 84 | 3 | KGMNDLLGMDLVSPK            | 46d  | 28 |
| FBgn0019624 | 538.12  | 52 | 3 | EGIDGWEIR                  | 50d  | 28 |
| FBgn0019624 | 794.5   | 58 | 1 | GMNDLLGMDLVSPK             | 50d  | 28 |
| FBgn0019624 | 1441.94 | 41 | 1 | ITPTLQELGIPTIEELGYDKPELALK | 50d  | 28 |
| FBgn0019624 | 858.5   | 55 | 2 | KGMNDLLGMDLVSPK            | 50d  | 28 |
| FBgn0019624 | 538.22  | 57 | 2 | EGIDGWEIR                  | 52d  | 28 |
| FBgn0019624 | 961.63  | 36 | 2 | ITPTLQELGIPTIEELGYDKPELALK | 52d  | 28 |
| FBgn0019624 | 794.51  | 63 | 1 | GMNDLLGMDLVSPK             | 56d  | 28 |
| FBgn0019624 | 858.61  | 68 | 1 | KGMNDLLGMDLVSPK            | 56d  | 28 |

|             |         |    |   |                        |      |    |
|-------------|---------|----|---|------------------------|------|----|
| FBgn0019644 | 853.74  | 57 | 2 | WADGEIDKIESEWK         | 22d  | 18 |
| FBgn0019644 | 853.64  | 45 | 1 | WADGEIDKIESEWK         | 42d  | 18 |
| FBgn0019644 | 569.06  | 42 | 1 | WADGEIDKIESEWK         | 82d  | 18 |
| FBgn0019644 | 853.3   | 60 | 1 | WADGEIDKIESEWK         | 132d | 18 |
| FBgn0019644 | 853.8   | 43 | 1 | WADGEIDKIESEWK         | 2d   | 28 |
| FBgn0019644 | 854.1   | 81 | 2 | WADGEIDKIESEWK         | 22d  | 28 |
| FBgn0019644 | 854.01  | 44 | 1 | WADGEIDKIESEWK         | 42d  | 28 |
| FBgn0019644 | 853.91  | 58 | 2 | WADGEIDKIESEWK         | 46d  | 28 |
| FBgn0019936 | 676.07  | 48 | 3 | IIDLHSPSEIVK           | 2d   | 18 |
| FBgn0019936 | 676.3   | 48 | 1 | IIDLHSPSEIVK           | 2d   | 28 |
| FBgn0019948 | 1002.55 | 68 | 1 | DGSTDDSGVFLDYTEEP      | 42d  | 18 |
| FBgn0019948 | 1002.64 | 74 | 1 | DGSTDDSGVFLDYTEEP      | 12d  | 28 |
| FBgn0019948 | 1002.4  | 61 | 2 | DGSTDDSGVFLDYTEEP      | 56d  | 28 |
| FBgn0019949 | 867.75  | 44 | 1 | EIRILQLLKHENVVNIEICR   | 62d  | 18 |
| FBgn0019957 | 896.57  | 35 | 1 | VFSDAYLSDLEQLYK        | 2d   | 18 |
| FBgn0019957 | 950.81  | 74 | 3 | YRPGYNADMGEGLLTK       | 2d   | 18 |
| FBgn0019957 | 896.69  | 56 | 2 | VFSDAYLSDLEQLYK        | 22d  | 18 |
| FBgn0019957 | 896.41  | 76 | 2 | VFSDAYLSDLEQLYK        | 42d  | 18 |
| FBgn0019957 | 896.69  | 68 | 2 | VFSDAYLSDLEQLYK        | 62d  | 18 |
| FBgn0019957 | 1239.04 | 39 | 1 | YSQYIDALQHVLSTGQGVVLER | 62d  | 18 |
| FBgn0019957 | 705.05  | 61 | 1 | FPLEAEWCEAR            | 102d | 18 |
| FBgn0019957 | 896.68  | 63 | 1 | VFSDAYLSDLEQLYK        | 102d | 18 |
| FBgn0019957 | 704.71  | 39 | 1 | FPLEAEWCEAR            | 122d | 18 |
| FBgn0019957 | 1239.32 | 35 | 1 | YSQYIDALQHVLSTGQGVVLER | 132d | 18 |
| FBgn0019957 | 1239.29 | 74 | 1 | YSQYIDALQHVLSTGQGVVLER | 142d | 18 |
| FBgn0019957 | 896.4   | 62 | 1 | VFSDAYLSDLEQLYK        | 2d   | 28 |
| FBgn0019957 | 951.1   | 51 | 1 | YRPGYNADMGEGLLTK       | 2d   | 28 |
| FBgn0019957 | 896.31  | 43 | 1 | VFSDAYLSDLEQLYK        | 12d  | 28 |
| FBgn0019957 | 950.76  | 86 | 3 | YRPGYNADMGEGLLTK       | 12d  | 28 |
| FBgn0019957 | 1239.19 | 52 | 1 | YSQYIDALQHVLSTGQGVVLER | 12d  | 28 |
| FBgn0019957 | 950.87  | 58 | 1 | YRPGYNADMGEGLLTK       | 22d  | 28 |
| FBgn0019957 | 896.19  | 62 | 2 | VFSDAYLSDLEQLYK        | 32d  | 28 |

|             |         |    |   |                             |      |    |
|-------------|---------|----|---|-----------------------------|------|----|
| FBgn0019957 | 896.39  | 72 | 2 | VFSDAYLSDLEQLYK             | 36d  | 28 |
| FBgn0019957 | 896.58  | 44 | 1 | VFSDAYLSDLEQLYK             | 42d  | 28 |
| FBgn0019957 | 896.5   | 64 | 1 | VFSDAYLSDLEQLYK             | 46d  | 28 |
| FBgn0019957 | 950.9   | 46 | 1 | YRPGYNADMGDEGLLTK           | 50d  | 28 |
| FBgn0019957 | 896.41  | 41 | 1 | VFSDAYLSDLEQLYK             | 52d  | 28 |
| FBgn0019957 | 1239.19 | 69 | 1 | YSQYIDALQHVLSTGQGVVLER      | 52d  | 28 |
| FBgn0019957 | 896.44  | 46 | 1 | VFSDAYLSDLEQLYK             | 56d  | 28 |
| FBgn0019960 | 1150.8  | 47 | 1 | NYFIDEIESIFPGLSLADKK        | 122d | 18 |
| FBgn0019982 | 931.48  | 42 | 1 | TSHATQVLAASLADFKPEQFGLPAFTD | 102d | 18 |
| FBgn0020235 | 901.57  | 72 | 2 | IANEVLQTGYDYTEGK            | 2d   | 18 |
| FBgn0020235 | 713.05  | 48 | 2 | LAVYDSLSDVVK                | 2d   | 18 |
| FBgn0020235 | 901.63  | 66 | 3 | IANEVLQTGYDYTEGK            | 22d  | 18 |
| FBgn0020235 | 608.88  | 72 | 1 | NILMVANEVGR                 | 22d  | 18 |
| FBgn0020235 | 901.47  | 76 | 1 | IANEVLQTGYDYTEGK            | 42d  | 18 |
| FBgn0020235 | 712.79  | 73 | 2 | LAVYDSLSDVVK                | 42d  | 18 |
| FBgn0020235 | 901.42  | 69 | 2 | IANEVLQTGYDYTEGK            | 62d  | 18 |
| FBgn0020235 | 712.54  | 58 | 2 | LAVYDSLSDVVK                | 62d  | 18 |
| FBgn0020235 | 485.46  | 45 | 1 | MTAMDNASK                   | 62d  | 18 |
| FBgn0020235 | 901.19  | 62 | 3 | IANEVLQTGYDYTEGK            | 82d  | 18 |
| FBgn0020235 | 713.07  | 60 | 1 | LAVYDSLSDVVK                | 82d  | 18 |
| FBgn0020235 | 609     | 63 | 1 | NILMVANEVGR                 | 82d  | 18 |
| FBgn0020235 | 901.29  | 63 | 1 | IANEVLQTGYDYTEGK            | 112d | 18 |
| FBgn0020235 | 901.18  | 49 | 2 | IANEVLQTGYDYTEGK            | 122d | 18 |
| FBgn0020235 | 608.78  | 65 | 2 | NILMVANEVGR                 | 122d | 18 |
| FBgn0020235 | 901.55  | 57 | 1 | IANEVLQTGYDYTEGK            | 132d | 18 |
| FBgn0020235 | 901.47  | 67 | 3 | IANEVLQTGYDYTEGK            | 142d | 18 |
| FBgn0020235 | 608.82  | 71 | 2 | NILMVANEVGR                 | 142d | 18 |
| FBgn0020235 | 901.43  | 59 | 2 | IANEVLQTGYDYTEGK            | 2d   | 28 |
| FBgn0020235 | 608.92  | 67 | 3 | NILMVANEVGR                 | 2d   | 28 |
| FBgn0020235 | 901.32  | 74 | 3 | IANEVLQTGYDYTEGK            | 12d  | 28 |
| FBgn0020235 | 712.91  | 79 | 3 | LAVYDSLSDVVK                | 12d  | 28 |
| FBgn0020235 | 608.67  | 80 | 2 | NILMVANEVGR                 | 12d  | 28 |

|             |        |    |   |                   |      |    |
|-------------|--------|----|---|-------------------|------|----|
| FBgn0020235 | 651.05 | 45 | 2 | ELIEISGAAALT      | 22d  | 28 |
| FBgn0020235 | 901.48 | 47 | 1 | IANEVLQTYDYTEGK   | 22d  | 28 |
| FBgn0020235 | 901.19 | 64 | 2 | IANEVLQTYDYTEGK   | 32d  | 28 |
| FBgn0020235 | 712.68 | 67 | 3 | LAVYDSLDSVVK      | 32d  | 28 |
| FBgn0020235 | 608.9  | 74 | 3 | NILMVANEVGR       | 32d  | 28 |
| FBgn0020235 | 901.27 | 57 | 2 | IANEVLQTYDYTEGK   | 36d  | 28 |
| FBgn0020235 | 559.06 | 39 | 1 | KLLIAVTSR         | 36d  | 28 |
| FBgn0020235 | 713.08 | 58 | 3 | LAVYDSLDSVVK      | 36d  | 28 |
| FBgn0020235 | 608.8  | 59 | 2 | NILMVANEVGR       | 36d  | 28 |
| FBgn0020235 | 712.67 | 58 | 3 | LAVYDSLDSVVK      | 42d  | 28 |
| FBgn0020235 | 485.2  | 35 | 1 | MTAMDASK          | 42d  | 28 |
| FBgn0020235 | 608.69 | 50 | 1 | NILMVANEVGR       | 42d  | 28 |
| FBgn0020235 | 901.26 | 57 | 2 | IANEVLQTYDYTEGK   | 46d  | 28 |
| FBgn0020235 | 713.1  | 63 | 2 | LAVYDSLDSVVK      | 46d  | 28 |
| FBgn0020235 | 609.07 | 55 | 2 | NILMVANEVGR       | 46d  | 28 |
| FBgn0020235 | 651.23 | 40 | 1 | ELIEISGAAALT      | 50d  | 28 |
| FBgn0020235 | 901.38 | 61 | 2 | IANEVLQTYDYTEGK   | 50d  | 28 |
| FBgn0020235 | 712.85 | 65 | 3 | LAVYDSLDSVVK      | 50d  | 28 |
| FBgn0020235 | 608.73 | 56 | 1 | NILMVANEVGR       | 50d  | 28 |
| FBgn0020235 | 712.87 | 73 | 3 | LAVYDSLDSVVK      | 52d  | 28 |
| FBgn0020235 | 901.33 | 58 | 2 | IANEVLQTYDYTEGK   | 56d  | 28 |
| FBgn0020235 | 608.88 | 64 | 2 | NILMVANEVGR       | 56d  | 28 |
| FBgn0020236 | 698.88 | 45 | 1 | SIGFIGHYMDQK      | 2d   | 18 |
| FBgn0020236 | 918.42 | 57 | 1 | GQELIYAGMPISEVLSK | 42d  | 18 |
| FBgn0020236 | 938.94 | 48 | 1 | HPWDDISYVIPEQYN   | 42d  | 18 |
| FBgn0020236 | 938.77 | 41 | 1 | HPWDDISYVIPEQYN   | 82d  | 18 |
| FBgn0020236 | 544.72 | 39 | 1 | DLVSSVVSGLLTIGDR  | 122d | 18 |
| FBgn0020236 | 938.73 | 48 | 1 | HPWDDISYVIPEQYN   | 122d | 18 |
| FBgn0020236 | 918.49 | 56 | 1 | GQELIYAGMPISEVLSK | 132d | 18 |
| FBgn0020236 | 938.64 | 39 | 1 | HPWDDISYVIPEQYN   | 2d   | 28 |
| FBgn0020236 | 918.55 | 58 | 1 | GQELIYAGMPISEVLSK | 32d  | 28 |
| FBgn0020236 | 779.39 | 85 | 2 | LDVPVNSSLSLADVK   | 36d  | 28 |

|             |         |    |   |                           |      |    |
|-------------|---------|----|---|---------------------------|------|----|
| FBgn0020236 | 699.07  | 37 | 1 | SIGFIGHYMDQK              | 36d  | 28 |
| FBgn0020236 | 918.31  | 57 | 2 | GQELIYAGMPISEVLSK         | 42d  | 28 |
| FBgn0020236 | 779.36  | 62 | 2 | LDVPVNSSLADVK             | 42d  | 28 |
| FBgn0020236 | 699.01  | 54 | 3 | SIGFIGHYMDQK              | 42d  | 28 |
| FBgn0020236 | 918.54  | 69 | 1 | GQELIYAGMPISEVLSK         | 56d  | 28 |
| FBgn0020238 | 1044.98 | 82 | 3 | AAFDDAIAELDTLSEESYK       | 2d   | 18 |
| FBgn0020238 | 910.52  | 50 | 2 | AASDIAMNDLPPTHPIR         | 2d   | 18 |
| FBgn0020238 | 598.27  | 79 | 3 | DAAENSLIAYK               | 2d   | 18 |
| FBgn0020238 | 710.58  | 78 | 2 | DICSDILNVLEK              | 2d   | 18 |
| FBgn0020238 | 1367.02 | 79 | 2 | DNLTLWTSDMQAEEVDPNAGDGEPK | 2d   | 18 |
| FBgn0020238 | 454.75  | 46 | 2 | NLLSVAYK                  | 2d   | 18 |
| FBgn0020238 | 615.58  | 81 | 2 | YLAEFATGSDR               | 2d   | 18 |
| FBgn0020238 | 679.82  | 56 | 1 | YLAEFATGSDRK              | 2d   | 18 |
| FBgn0020238 | 1044.9  | 71 | 2 | AAFDDAIAELDTLSEESYK       | 22d  | 18 |
| FBgn0020238 | 710.23  | 76 | 1 | DICSDILNVLEK              | 22d  | 18 |
| FBgn0020238 | 558.72  | 36 | 1 | YDEMVEAMK                 | 22d  | 18 |
| FBgn0020238 | 615.74  | 50 | 1 | YLAEFATGSDR               | 22d  | 18 |
| FBgn0020238 | 1044.91 | 75 | 1 | AAFDDAIAELDTLSEESYK       | 42d  | 18 |
| FBgn0020238 | 910.32  | 76 | 2 | AASDIAMNDLPPTHPIR         | 42d  | 18 |
| FBgn0020238 | 710.54  | 78 | 2 | DICSDILNVLEK              | 42d  | 18 |
| FBgn0020238 | 409.06  | 51 | 1 | LAEQAER                   | 42d  | 18 |
| FBgn0020238 | 1045.14 | 91 | 3 | AAFDDAIAELDTLSEESYK       | 62d  | 18 |
| FBgn0020238 | 598.27  | 85 | 1 | DAAENSLIAYK               | 62d  | 18 |
| FBgn0020238 | 710.14  | 86 | 2 | DICSDILNVLEK              | 62d  | 18 |
| FBgn0020238 | 409.24  | 49 | 1 | LAEQAER                   | 62d  | 18 |
| FBgn0020238 | 615.88  | 64 | 1 | YLAEFATGSDR               | 62d  | 18 |
| FBgn0020238 | 1045.19 | 92 | 3 | AAFDDAIAELDTLSEESYK       | 82d  | 18 |
| FBgn0020238 | 710.36  | 81 | 3 | DICSDILNVLEK              | 82d  | 18 |
| FBgn0020238 | 408.9   | 48 | 1 | LAEQAER                   | 82d  | 18 |
| FBgn0020238 | 1044.86 | 88 | 3 | AAFDDAIAELDTLSEESYK       | 102d | 18 |
| FBgn0020238 | 710.43  | 69 | 1 | DICSDILNVLEK              | 102d | 18 |
| FBgn0020238 | 1367.18 | 62 | 1 | DNLTLWTSDMQAEEVDPNAGDGEPK | 102d | 18 |

|             |         |     |   |                            |      |    |
|-------------|---------|-----|---|----------------------------|------|----|
| FBgn0020238 | 679.95  | 65  | 1 | YLAEFATGSDRK               | 102d | 18 |
| FBgn0020238 | 1044.93 | 80  | 2 | AAFDDAIAELDTLSEESYK        | 112d | 18 |
| FBgn0020238 | 710.54  | 79  | 3 | DICSDILNVLEK               | 112d | 18 |
| FBgn0020238 | 1367.18 | 34  | 1 | DNLTTLWTSDMQAEEVDPNAGDGEPK | 112d | 18 |
| FBgn0020238 | 1044.93 | 107 | 1 | AAFDDAIAELDTLSEESYK        | 122d | 18 |
| FBgn0020238 | 910.46  | 35  | 1 | AASDIAMNDLPPTHPIR          | 122d | 18 |
| FBgn0020238 | 409.23  | 48  | 1 | LAEQAER                    | 122d | 18 |
| FBgn0020238 | 1045.02 | 80  | 1 | AAFDDAIAELDTLSEESYK        | 132d | 18 |
| FBgn0020238 | 598.49  | 60  | 1 | DAAENSLIAYK                | 132d | 18 |
| FBgn0020238 | 710.49  | 66  | 1 | DICSDILNVLEK               | 132d | 18 |
| FBgn0020238 | 558.43  | 62  | 1 | YDEMVEAMK                  | 132d | 18 |
| FBgn0020238 | 1044.52 | 80  | 3 | AAFDDAIAELDTLSEESYK        | 142d | 18 |
| FBgn0020238 | 710.44  | 73  | 2 | DICSDILNVLEK               | 142d | 18 |
| FBgn0020238 | 697.14  | 80  | 3 | AAFDDAIAELDTLSEESYK        | 2d   | 28 |
| FBgn0020238 | 910.29  | 44  | 3 | AASDIAMNDLPPTHPIR          | 2d   | 28 |
| FBgn0020238 | 598.44  | 76  | 3 | DAAENSLIAYK                | 2d   | 28 |
| FBgn0020238 | 710.47  | 80  | 3 | DICSDILNVLEK               | 2d   | 28 |
| FBgn0020238 | 1366.92 | 58  | 3 | DNLTTLWTSDMQAEEVDPNAGDGEPK | 2d   | 28 |
| FBgn0020238 | 409.12  | 47  | 1 | LAEQAER                    | 2d   | 28 |
| FBgn0020238 | 616.02  | 60  | 3 | YLAEFATGSDR                | 2d   | 28 |
| FBgn0020238 | 679.75  | 63  | 3 | YLAEFATGSDRK               | 2d   | 28 |
| FBgn0020238 | 1044.86 | 86  | 3 | AAFDDAIAELDTLSEESYK        | 12d  | 28 |
| FBgn0020238 | 910.44  | 54  | 1 | AASDIAMNDLPPTHPIR          | 12d  | 28 |
| FBgn0020238 | 598.19  | 69  | 3 | DAAENSLIAYK                | 12d  | 28 |
| FBgn0020238 | 710.36  | 79  | 3 | DICSDILNVLEK               | 12d  | 28 |
| FBgn0020238 | 615.83  | 54  | 2 | YLAEFATGSDR                | 12d  | 28 |
| FBgn0020238 | 679.69  | 34  | 1 | YLAEFATGSDRK               | 22d  | 28 |
| FBgn0020238 | 1044.87 | 79  | 3 | AAFDDAIAELDTLSEESYK        | 32d  | 28 |
| FBgn0020238 | 598.04  | 54  | 3 | DAAENSLIAYK                | 32d  | 28 |
| FBgn0020238 | 710.04  | 74  | 3 | DICSDILNVLEK               | 32d  | 28 |
| FBgn0020238 | 696.91  | 62  | 2 | AAFDDAIAELDTLSEESYK        | 36d  | 28 |
| FBgn0020238 | 607.44  | 50  | 1 | AASDIAMNDLPPTHPIR          | 36d  | 28 |



|             |         |    |   |                                  |      |    |
|-------------|---------|----|---|----------------------------------|------|----|
| FBgn0020238 | 710.51  | 79 | 3 | DICSDILNVLEK                     | 36d  | 28 |
| FBgn0020238 | 679.63  | 81 | 2 | YLAEFATGSDRK                     | 36d  | 28 |
| FBgn0020238 | 1045.11 | 87 | 2 | AAFDDAIAELDTLSEESYK              | 42d  | 28 |
| FBgn0020238 | 710.47  | 86 | 1 | DICSDILNVLEK                     | 42d  | 28 |
| FBgn0020238 | 1367.31 | 53 | 1 | DNLTWTSMDQAEEVDPNAGDGEPK         | 42d  | 28 |
| FBgn0020238 | 697.08  | 76 | 3 | AAFDDAIAELDTLSEESYK              | 46d  | 28 |
| FBgn0020238 | 598.13  | 47 | 2 | DAAENSLIAYK                      | 46d  | 28 |
| FBgn0020238 | 710.1   | 67 | 1 | DICSDILNVLEK                     | 46d  | 28 |
| FBgn0020238 | 615.91  | 55 | 1 | YLAEFATGSDR                      | 46d  | 28 |
| FBgn0020238 | 679.75  | 72 | 3 | YLAEFATGSDRK                     | 46d  | 28 |
| FBgn0020238 | 1045.13 | 80 | 3 | AAFDDAIAELDTLSEESYK              | 50d  | 28 |
| FBgn0020238 | 910.36  | 86 | 2 | AASDIAMNDLPPTHPIR                | 50d  | 28 |
| FBgn0020238 | 598.48  | 75 | 3 | DAAENSLIAYK                      | 50d  | 28 |
| FBgn0020238 | 710.08  | 78 | 3 | DICSDILNVLEK                     | 50d  | 28 |
| FBgn0020238 | 615.76  | 73 | 1 | YLAEFATGSDR                      | 50d  | 28 |
| FBgn0020238 | 1045.01 | 69 | 2 | AAFDDAIAELDTLSEESYK              | 52d  | 28 |
| FBgn0020238 | 710.07  | 73 | 2 | DICSDILNVLEK                     | 52d  | 28 |
| FBgn0020238 | 1366.98 | 89 | 1 | DNLTWTSMDQAEEVDPNAGDGEPK         | 52d  | 28 |
| FBgn0020238 | 1045.04 | 91 | 2 | AAFDDAIAELDTLSEESYK              | 56d  | 28 |
| FBgn0020238 | 597.99  | 52 | 1 | DAAENSLIAYK                      | 56d  | 28 |
| FBgn0020238 | 710.54  | 76 | 1 | DICSDILNVLEK                     | 56d  | 28 |
| FBgn0020238 | 1366.93 | 52 | 1 | DNLTWTSMDQAEEVDPNAGDGEPK         | 56d  | 28 |
| FBgn0020238 | 408.92  | 49 | 1 | LAEQAER                          | 56d  | 28 |
| FBgn0020254 | 481.64  | 36 | 1 | ADEELRTK                         | 82d  | 18 |
| FBgn0020254 | 1577.74 | 54 | 2 | VLVTGAAGTQDQLANAAQNAVSTITQLAEAVK | 52d  | 28 |
| FBgn0020255 | 648.47  | 73 | 1 | FNVWDTAGQEK                      | 2d   | 18 |
| FBgn0020255 | 1125.76 | 68 | 2 | LVGDPNLEFVAMPALLPPEVK            | 2d   | 18 |
| FBgn0020255 | 1125.41 | 60 | 1 | LVGDPNLEFVAMPALLPPEVK            | 112d | 18 |
| FBgn0020255 | 648.02  | 45 | 1 | FNVWDTAGQEK                      | 132d | 18 |
| FBgn0020255 | 1125.67 | 48 | 1 | LVGDPNLEFVAMPALLPPEVK            | 142d | 18 |
| FBgn0020255 | 648.12  | 35 | 1 | FNVWDTAGQEK                      | 12d  | 28 |
| FBgn0020255 | 1125.75 | 77 | 4 | LVGDPNLEFVAMPALLPPEVK            | 56d  | 28 |

|             |         |     |   |                           |      |    |
|-------------|---------|-----|---|---------------------------|------|----|
| FBgn0020258 | 510.63  | 41  | 1 | IPFPTITICPEIK             | 42d  | 28 |
| FBgn0020279 | 811.63  | 62  | 1 | AANNTADGAAGDGDWADGNGNADRR | 2d   | 28 |
| FBgn0020367 | 758.86  | 58  | 1 | TALVANTSNPVAAAR           | 2d   | 18 |
| FBgn0020367 | 924.37  | 72  | 2 | ADFEQLHEDLQQAFR           | 22d  | 18 |
| FBgn0020367 | 891.96  | 83  | 3 | LAEMPADSGYPAYLGAR         | 22d  | 18 |
| FBgn0020367 | 768.65  | 64  | 1 | DINELTESIYIPK             | 42d  | 18 |
| FBgn0020367 | 924.26  | 39  | 1 | ADFEQLHEDLQQAFR           | 62d  | 18 |
| FBgn0020367 | 706.56  | 82  | 1 | VGYVELVGEIIR              | 62d  | 18 |
| FBgn0020367 | 1036.7  | 35  | 1 | EILQEEEDLSEIVQLVGK        | 102d | 18 |
| FBgn0020367 | 706.37  | 89  | 2 | VGYVELVGEIIR              | 102d | 18 |
| FBgn0020367 | 706.3   | 73  | 3 | VGYVELVGEIIR              | 112d | 18 |
| FBgn0020367 | 703.07  | 59  | 1 | VASWEFNPLNVK              | 122d | 18 |
| FBgn0020367 | 924.62  | 36  | 1 | ADFEQLHEDLQQAFR           | 132d | 18 |
| FBgn0020367 | 1036.75 | 38  | 1 | EILQEEEDLSEIVQLVGK        | 132d | 18 |
| FBgn0020367 | 616.57  | 54  | 1 | ADFEQLHEDLQQAFR           | 2d   | 28 |
| FBgn0020367 | 924.53  | 62  | 1 | ADFEQLHEDLQQAFR           | 12d  | 28 |
| FBgn0020367 | 892.14  | 71  | 3 | LAEMPADSGYPAYLGAR         | 12d  | 28 |
| FBgn0020367 | 758.83  | 60  | 2 | TALVANTSNPVAAAR           | 12d  | 28 |
| FBgn0020367 | 706.41  | 76  | 1 | VGYVELVGEIIR              | 12d  | 28 |
| FBgn0020367 | 1036.69 | 66  | 1 | EILQEEEDLSEIVQLVGK        | 32d  | 28 |
| FBgn0020367 | 706.18  | 85  | 3 | VGYVELVGEIIR              | 52d  | 28 |
| FBgn0020367 | 768.54  | 44  | 1 | DINELTESIYIPK             | 56d  | 28 |
| FBgn0020367 | 1036.38 | 81  | 3 | EILQEEEDLSEIVQLVGK        | 56d  | 28 |
| FBgn0020367 | 891.99  | 76  | 2 | LAEMPADSGYPAYLGAR         | 56d  | 28 |
| FBgn0020368 | 1067.04 | 76  | 2 | ALDEYYDKNYPEFVPLR         | 2d   | 18 |
| FBgn0020368 | 891.95  | 76  | 1 | LAEMPADSGYPAYLGAR         | 2d   | 18 |
| FBgn0020368 | 676.52  | 47  | 3 | LPANHPLFTGQR              | 2d   | 18 |
| FBgn0020368 | 761.98  | 45  | 3 | SEMWEFNPLNVR              | 2d   | 18 |
| FBgn0020368 | 711.72  | 36  | 1 | ALDEYYDKNYPEFVPLR         | 22d  | 18 |
| FBgn0020368 | 938.54  | 73  | 3 | ADYDQLYEDLQQAFR           | 42d  | 18 |
| FBgn0020368 | 1066.93 | 100 | 3 | ALDEYYDKNYPEFVPLR         | 42d  | 18 |
| FBgn0020368 | 762     | 61  | 1 | SEMWEFNPLNVR              | 42d  | 18 |

|             |         |    |   |                    |      |    |
|-------------|---------|----|---|--------------------|------|----|
| FBgn0020368 | 938.6   | 75 | 1 | ADYDQLYEDLQQAFR    | 62d  | 18 |
| FBgn0020368 | 1066.75 | 66 | 2 | ALDEYYDKNYPEFVPLR  | 62d  | 18 |
| FBgn0020368 | 676.22  | 37 | 1 | LPANHPLFTGQR       | 62d  | 18 |
| FBgn0020368 | 938.6   | 65 | 2 | ADYDQLYEDLQQAFR    | 82d  | 18 |
| FBgn0020368 | 706.58  | 72 | 2 | VGYYELVGEIIR       | 82d  | 18 |
| FBgn0020368 | 938.48  | 53 | 1 | ADYDQLYEDLQQAFR    | 102d | 18 |
| FBgn0020368 | 938.58  | 58 | 2 | ADYDQLYEDLQQAFR    | 112d | 18 |
| FBgn0020368 | 644.47  | 52 | 1 | HAVESTAQSDNK       | 112d | 18 |
| FBgn0020368 | 761.3   | 70 | 2 | SEMWEFNPLNVR       | 122d | 18 |
| FBgn0020368 | 706.4   | 84 | 2 | VGYYELVGEIIR       | 122d | 18 |
| FBgn0020368 | 1066.86 | 47 | 1 | ALDEYYDKNYPEFVPLR  | 132d | 18 |
| FBgn0020368 | 761.71  | 50 | 1 | SEMWEFNPLNVR       | 132d | 18 |
| FBgn0020368 | 761.91  | 52 | 1 | SEMWEFNPLNVR       | 142d | 18 |
| FBgn0020368 | 938.47  | 51 | 2 | ADYDQLYEDLQQAFR    | 2d   | 28 |
| FBgn0020368 | 1036.37 | 34 | 1 | EILQEEEDLSEIVQLVGK | 2d   | 28 |
| FBgn0020368 | 676.33  | 55 | 2 | LPANHPLFTGQR       | 2d   | 28 |
| FBgn0020368 | 761.92  | 55 | 2 | SEMWEFNPLNVR       | 2d   | 28 |
| FBgn0020368 | 705.68  | 73 | 2 | VGYYELVGEIIR       | 2d   | 28 |
| FBgn0020368 | 1066.96 | 62 | 2 | ALDEYYDKNYPEFVPLR  | 12d  | 28 |
| FBgn0020368 | 676.53  | 42 | 1 | LPANHPLFTGQR       | 12d  | 28 |
| FBgn0020368 | 762.08  | 60 | 1 | SEMWEFNPLNVR       | 12d  | 28 |
| FBgn0020368 | 1066.73 | 60 | 1 | ALDEYYDKNYPEFVPLR  | 22d  | 28 |
| FBgn0020368 | 676.25  | 48 | 3 | LPANHPLFTGQR       | 22d  | 28 |
| FBgn0020368 | 1066.88 | 55 | 2 | ALDEYYDKNYPEFVPLR  | 32d  | 28 |
| FBgn0020368 | 1042.84 | 35 | 1 | DFPELTCEIDGVTESIMK | 32d  | 28 |
| FBgn0020368 | 676.46  | 39 | 1 | LPANHPLFTGQR       | 32d  | 28 |
| FBgn0020368 | 761.84  | 56 | 3 | SEMWEFNPLNVR       | 32d  | 28 |
| FBgn0020368 | 706.21  | 73 | 1 | VGYYELVGEIIR       | 32d  | 28 |
| FBgn0020368 | 1043.08 | 45 | 1 | DFPELTCEIDGVTESIMK | 36d  | 28 |
| FBgn0020368 | 762.03  | 51 | 2 | SEMWEFNPLNVR       | 36d  | 28 |
| FBgn0020368 | 938.53  | 46 | 1 | ADYDQLYEDLQQAFR    | 42d  | 28 |
| FBgn0020368 | 1067    | 81 | 2 | ALDEYYDKNYPEFVPLR  | 42d  | 28 |

|             |         |    |   |                           |      |    |
|-------------|---------|----|---|---------------------------|------|----|
| FBgn0020368 | 644.11  | 80 | 2 | HAVESTAQSDNK              | 42d  | 28 |
| FBgn0020368 | 891.76  | 54 | 1 | LAEMPADSGYPAYLGAR         | 42d  | 28 |
| FBgn0020368 | 676.33  | 45 | 3 | LPANHPLFTGQR              | 42d  | 28 |
| FBgn0020368 | 761.78  | 65 | 2 | SEMWEFNPLNVR              | 42d  | 28 |
| FBgn0020368 | 938.47  | 49 | 1 | ADYDQLYEDLQQAFR           | 46d  | 28 |
| FBgn0020368 | 1066.97 | 88 | 2 | ALDEYYDKNYPEFVPLR         | 46d  | 28 |
| FBgn0020368 | 1042.81 | 38 | 1 | DFPELTCEIDGVTESIMK        | 46d  | 28 |
| FBgn0020368 | 676.46  | 41 | 1 | LPANHPLFTGQR              | 46d  | 28 |
| FBgn0020368 | 761.99  | 59 | 2 | SEMWEFNPLNVR              | 46d  | 28 |
| FBgn0020368 | 706.22  | 92 | 2 | VGYYELVGEIIR              | 46d  | 28 |
| FBgn0020368 | 761.75  | 65 | 1 | SEMWEFNPLNVR              | 50d  | 28 |
| FBgn0020368 | 758.89  | 64 | 1 | TALVANTSNMPVAAR           | 50d  | 28 |
| FBgn0020368 | 706.15  | 82 | 1 | VGYYELVGEIIR              | 50d  | 28 |
| FBgn0020368 | 938.36  | 73 | 1 | ADYDQLYEDLQQAFR           | 52d  | 28 |
| FBgn0020368 | 1043.19 | 37 | 1 | DFPELTCEIDGVTESIMK        | 52d  | 28 |
| FBgn0020368 | 761.74  | 63 | 2 | SEMWEFNPLNVR              | 56d  | 28 |
| FBgn0020368 | 706.2   | 86 | 3 | VGYYELVGEIIR              | 56d  | 28 |
| FBgn0020370 | 768.51  | 93 | 3 | IVEFESQNPGEASK            | 2d   | 28 |
| FBgn0020414 | 1134.44 | 54 | 1 | DSGDSGMPVVPSTQGPAPAGPQSK  | 2d   | 18 |
| FBgn0020414 | 1134.67 | 39 | 2 | DSGDSGMPVVPSTQGPAPAGPQSK  | 12d  | 28 |
| FBgn0020414 | 1134.51 | 43 | 1 | DSGDSGMPVVPSTQGPAPAGPQSK  | 36d  | 28 |
| FBgn0020414 | 1134.52 | 36 | 1 | DSGDSGMPVVPSTQGPAPAGPQSK  | 52d  | 28 |
| FBgn0020439 | 1204.14 | 49 | 1 | TSTTGAGPGGYSYSTTSGNLPGGTK | 102d | 18 |
| FBgn0020439 | 465.86  | 77 | 1 | LAEEAAAQK                 | 142d | 18 |
| FBgn0020497 | 690.61  | 34 | 1 | NVDFLKNMTAVK              | 36d  | 28 |
| FBgn0020513 | 1035.13 | 36 | 1 | DDANHDPQWSEEQIVSAK        | 2d   | 18 |
| FBgn0020513 | 795.95  | 86 | 3 | NLASVTASDLDTVKR           | 2d   | 18 |
| FBgn0020513 | 1035.31 | 57 | 1 | DDANHDPQWSEEQIVSAK        | 62d  | 18 |
| FBgn0020513 | 872.53  | 56 | 1 | NFIWVAEQLADIVPK           | 82d  | 18 |
| FBgn0020513 | 795.81  | 77 | 2 | NLASVTASDLDTVKR           | 2d   | 28 |
| FBgn0020513 | 795.83  | 90 | 2 | NLASVTASDLDTVKR           | 12d  | 28 |
| FBgn0020513 | 795.8   | 42 | 1 | NLASVTASDLDTVKR           | 22d  | 28 |

|             |         |    |   |                         |      |    |
|-------------|---------|----|---|-------------------------|------|----|
| FBgn0020513 | 872.38  | 35 | 1 | NFIWVAEQLADIVPK         | 56d  | 28 |
| FBgn0020611 | 816.11  | 49 | 1 | VGTL DQLVGLSDDL GK      | 2d   | 18 |
| FBgn0020611 | 816.17  | 69 | 1 | VGTL DQLVGLSDDL GK      | 22d  | 18 |
| FBgn0020611 | 816.03  | 58 | 2 | VGTL DQLVGLSDDL GK      | 42d  | 18 |
| FBgn0020611 | 742.98  | 55 | 1 | VMANDWLTNYEK            | 42d  | 18 |
| FBgn0020611 | 754     | 44 | 1 | VANYLGEVLEDQR           | 102d | 18 |
| FBgn0020611 | 815.99  | 68 | 2 | VGTL DQLVGLSDDL GK      | 102d | 18 |
| FBgn0020611 | 743     | 43 | 1 | VMANDWLTNYEK            | 112d | 18 |
| FBgn0020611 | 815.8   | 39 | 1 | VGTL DQLVGLSDDL GK      | 122d | 18 |
| FBgn0020611 | 742.99  | 60 | 1 | VMANDWLTNYEK            | 122d | 18 |
| FBgn0020611 | 815.98  | 63 | 1 | VGTL DQLVGLSDDL GK      | 142d | 18 |
| FBgn0020611 | 816.06  | 74 | 1 | VGTL DQLVGLSDDL GK      | 2d   | 28 |
| FBgn0020611 | 816.18  | 45 | 1 | VGTL DQLVGLSDDL GK      | 12d  | 28 |
| FBgn0020611 | 816.17  | 67 | 3 | VGTL DQLVGLSDDL GK      | 32d  | 28 |
| FBgn0020611 | 742.89  | 59 | 1 | VMANDWLTNYEK            | 32d  | 28 |
| FBgn0020611 | 815.9   | 93 | 2 | VGTL DQLVGLSDDL GK      | 36d  | 28 |
| FBgn0020611 | 815.91  | 95 | 3 | VGTL DQLVGLSDDL GK      | 42d  | 28 |
| FBgn0020611 | 742.77  | 60 | 3 | VMANDWLTNYEK            | 42d  | 28 |
| FBgn0020611 | 816     | 62 | 2 | VGTL DQLVGLSDDL GK      | 46d  | 28 |
| FBgn0020611 | 742.81  | 51 | 1 | VMANDWLTNYEK            | 46d  | 28 |
| FBgn0020611 | 742.98  | 68 | 2 | VMANDWLTNYEK            | 50d  | 28 |
| FBgn0020611 | 816.13  | 49 | 1 | VGTL DQLVGLSDDL GK      | 52d  | 28 |
| FBgn0020611 | 743.03  | 53 | 2 | VMANDWLTNYEK            | 52d  | 28 |
| FBgn0020611 | 816.09  | 61 | 1 | VGTL DQLVGLSDDL GK      | 56d  | 28 |
| FBgn0020618 | 954.56  | 90 | 1 | GTLIGHNGWVTQIATNPK      | 2d   | 18 |
| FBgn0020618 | 836.54  | 53 | 6 | TVEELRPEVVSPTSK         | 2d   | 18 |
| FBgn0020618 | 836.38  | 44 | 1 | TVEELRPEVVSPTSK         | 2d   | 28 |
| FBgn0020618 | 836.28  | 40 | 1 | TVEELRPEVVSPTSK         | 12d  | 28 |
| FBgn0020653 | 1293.69 | 66 | 2 | SGLTINTLINTVGIHPTTAEFTR | 2d   | 18 |
| FBgn0020653 | 792.15  | 39 | 1 | VYGLHYIGPVAGEVIQGF AALK | 2d   | 18 |
| FBgn0020653 | 1293.87 | 45 | 1 | SGLTINTLINTVGIHPTTAEFTR | 62d  | 18 |
| FBgn0020653 | 792.11  | 54 | 1 | VYGLHYIGPVAGEVIQGF AALK | 102d | 18 |

|             |         |     |   |                          |      |    |
|-------------|---------|-----|---|--------------------------|------|----|
| FBgn0020653 | 1293.73 | 67  | 1 | SGLTINTLINTVGIHPTTAEFTR  | 122d | 18 |
| FBgn0020653 | 791.83  | 50  | 1 | VYGLHYIGPVAGEVIQGFAAALK  | 122d | 18 |
| FBgn0020653 | 1293.48 | 65  | 2 | SGLTINTLINTVGIHPTTAEFTR  | 12d  | 28 |
| FBgn0020653 | 862.94  | 54  | 1 | SGLTINTLINTVGIHPTTAEFTR  | 50d  | 28 |
| FBgn0020653 | 1308.27 | 61  | 1 | DVATTVFTPLEYACVGLSEEDAVK | 52d  | 28 |
| FBgn0020653 | 874.49  | 47  | 2 | VACLDFVKPTPTLGTK         | 52d  | 28 |
| FBgn0020653 | 791.64  | 35  | 1 | VYGLHYIGPVAGEVIQGFAAALK  | 52d  | 28 |
| FBgn0020653 | 803.1   | 95  | 2 | WGVGGTCVNVGCIPK          | 52d  | 28 |
| FBgn0020653 | 956.89  | 36  | 1 | GFDQQMAELVAASMEER        | 56d  | 28 |
| FBgn0020653 | 731.41  | 43  | 1 | KVEYINGLGSFVDSHTLLAK     | 56d  | 28 |
| FBgn0020765 | 1003.71 | 87  | 3 | TEEGVVNNAGTDNESISIR      | 2d   | 18 |
| FBgn0020765 | 1003.27 | 93  | 3 | TEEGVVNNAGTDNESISIR      | 22d  | 18 |
| FBgn0020765 | 1003.47 | 94  | 6 | TEEGVVNNAGTDNESISIR      | 62d  | 18 |
| FBgn0020765 | 1003.55 | 74  | 2 | TEEGVVNNAGTDNESISIR      | 82d  | 18 |
| FBgn0020765 | 1003.54 | 85  | 3 | TEEGVVNNAGTDNESISIR      | 102d | 18 |
| FBgn0020765 | 1003.54 | 77  | 2 | TEEGVVNNAGTDNESISIR      | 112d | 18 |
| FBgn0020765 | 1003.47 | 88  | 1 | TEEGVVNNAGTDNESISIR      | 122d | 18 |
| FBgn0020765 | 1003.7  | 101 | 2 | TEEGVVNNAGTDNESISIR      | 132d | 18 |
| FBgn0020765 | 1003.68 | 82  | 3 | TEEGVVNNAGTDNESISIR      | 142d | 18 |
| FBgn0020765 | 1003.48 | 100 | 7 | TEEGVVNNAGTDNESISIR      | 2d   | 28 |
| FBgn0020765 | 1003.35 | 93  | 3 | TEEGVVNNAGTDNESISIR      | 12d  | 28 |
| FBgn0020765 | 1003.41 | 74  | 2 | TEEGVVNNAGTDNESISIR      | 22d  | 28 |
| FBgn0020765 | 1003.35 | 82  | 3 | TEEGVVNNAGTDNESISIR      | 32d  | 28 |
| FBgn0020765 | 1003.36 | 87  | 3 | TEEGVVNNAGTDNESISIR      | 36d  | 28 |
| FBgn0020765 | 1003.37 | 90  | 3 | TEEGVVNNAGTDNESISIR      | 42d  | 28 |
| FBgn0020765 | 1003.3  | 90  | 3 | TEEGVVNNAGTDNESISIR      | 46d  | 28 |
| FBgn0020765 | 1003.71 | 94  | 3 | TEEGVVNNAGTDNESISIR      | 50d  | 28 |
| FBgn0020765 | 1003.45 | 62  | 1 | TEEGVVNNAGTDNESISIR      | 56d  | 28 |
| FBgn0020907 | 562.35  | 80  | 1 | MSQGQSEVTR               | 102d | 18 |
| FBgn0020907 | 497.02  | 44  | 1 | EQFAALWK                 | 122d | 18 |
| FBgn0020907 | 562.42  | 51  | 1 | MSQGQSEVTR               | 122d | 18 |
| FBgn0020907 | 562.42  | 56  | 2 | MSQGQSEVTR               | 132d | 18 |

|             |         |     |   |                           |      |    |
|-------------|---------|-----|---|---------------------------|------|----|
| FBgn0020907 | 497.2   | 49  | 1 | EQFAALWK                  | 2d   | 28 |
| FBgn0020907 | 562.11  | 74  | 2 | MSQGQSEVTR                | 2d   | 28 |
| FBgn0020907 | 562.19  | 88  | 1 | MSQGQSEVTR                | 12d  | 28 |
| FBgn0020907 | 978.42  | 36  | 1 | SKADKDNDGQVSVDEWCNMWDAYAK | 12d  | 28 |
| FBgn0020907 | 562.04  | 55  | 2 | MSQGQSEVTR                | 42d  | 28 |
| FBgn0020908 | 726.38  | 59  | 3 | AFETLLNDEDRK              | 2d   | 18 |
| FBgn0020908 | 1244.51 | 73  | 3 | ELYGQFLGNTADNHPAVNLFGPL   | 2d   | 18 |
| FBgn0020908 | 953.3   | 96  | 2 | NLWDEISAIADDDKDGK         | 2d   | 18 |
| FBgn0020908 | 953.41  | 48  | 1 | NLWDEISAIADDDKDGK         | 22d  | 18 |
| FBgn0020908 | 953.46  | 53  | 3 | NLWDEISAIADDDKDGK         | 42d  | 18 |
| FBgn0020908 | 953.12  | 96  | 2 | NLWDEISAIADDDKDGK         | 62d  | 18 |
| FBgn0020908 | 1244.8  | 45  | 1 | ELYGQFLGNTADNHPAVNLFGPL   | 82d  | 18 |
| FBgn0020908 | 952.43  | 75  | 2 | NLWDEISAIADDDKDGK         | 82d  | 18 |
| FBgn0020908 | 600.74  | 69  | 2 | VAIDDITPIDK               | 82d  | 18 |
| FBgn0020908 | 953.57  | 70  | 2 | NLWDEISAIADDDKDGK         | 102d | 18 |
| FBgn0020908 | 1244.84 | 34  | 1 | ELYGQFLGNTADNHPAVNLFGPL   | 112d | 18 |
| FBgn0020908 | 953.6   | 62  | 1 | NLWDEISAIADDDKDGK         | 112d | 18 |
| FBgn0020908 | 1244.68 | 72  | 1 | ELYGQFLGNTADNHPAVNLFGPL   | 122d | 18 |
| FBgn0020908 | 1244.85 | 59  | 1 | ELYGQFLGNTADNHPAVNLFGPL   | 132d | 18 |
| FBgn0020908 | 953.59  | 65  | 1 | NLWDEISAIADDDKDGK         | 132d | 18 |
| FBgn0020908 | 952.92  | 104 | 1 | NLWDEISAIADDDKDGK         | 142d | 18 |
| FBgn0020908 | 1244.68 | 71  | 2 | ELYGQFLGNTADNHPAVNLFGPL   | 12d  | 28 |
| FBgn0020908 | 953.2   | 103 | 2 | NLWDEISAIADDDKDGK         | 12d  | 28 |
| FBgn0020908 | 952.78  | 50  | 1 | NLWDEISAIADDDKDGK         | 22d  | 28 |
| FBgn0020908 | 953.48  | 78  | 1 | NLWDEISAIADDDKDGK         | 32d  | 28 |
| FBgn0020908 | 953.27  | 43  | 1 | NLWDEISAIADDDKDGK         | 42d  | 28 |
| FBgn0020908 | 636.12  | 78  | 2 | NLWDEISAIADDDKDGK         | 46d  | 28 |
| FBgn0020908 | 662.38  | 60  | 2 | AFETLLNDEDR               | 50d  | 28 |
| FBgn0020908 | 1244.52 | 60  | 3 | ELYGQFLGNTADNHPAVNLFGPL   | 50d  | 28 |
| FBgn0020908 | 636.08  | 41  | 1 | NLWDEISAIADDDKDGK         | 50d  | 28 |
| FBgn0020908 | 601.05  | 78  | 1 | VAIDDITPIDK               | 50d  | 28 |
| FBgn0020908 | 662.44  | 64  | 2 | AFETLLNDEDR               | 52d  | 28 |

|             |         |     |   |                             |      |    |
|-------------|---------|-----|---|-----------------------------|------|----|
| FBgn0020908 | 726.42  | 63  | 2 | AFETLLNDEDRK                | 52d  | 28 |
| FBgn0020908 | 1244.64 | 41  | 1 | ELYGQFLGNTADNHPAVNLFGPL     | 52d  | 28 |
| FBgn0020908 | 953.29  | 78  | 3 | NLWDEISAIADDDKDGK           | 52d  | 28 |
| FBgn0020908 | 600.73  | 69  | 3 | VAIDDITPIDK                 | 52d  | 28 |
| FBgn0020908 | 953     | 52  | 1 | NLWDEISAIADDDKDGK           | 56d  | 28 |
| FBgn0021765 | 1463.08 | 64  | 2 | LGEPSEY AHLVQAIYENPLLNGEVIR | 2d   | 18 |
| FBgn0021765 | 879.74  | 69  | 2 | LSAGLMGANEPNQDGQR           | 22d  | 18 |
| FBgn0021765 | 680.28  | 75  | 3 | NAVSLVTGGASGLGR             | 22d  | 18 |
| FBgn0021765 | 975.82  | 40  | 1 | LGEPSEY AHLVQAIYENPLLNGEVIR | 42d  | 18 |
| FBgn0021765 | 680.19  | 81  | 2 | NAVSLVTGGASGLGR             | 42d  | 18 |
| FBgn0021765 | 693.96  | 76  | 1 | QGASVILADLPSSK              | 42d  | 18 |
| FBgn0021765 | 680.62  | 54  | 1 | NAVSLVTGGASGLGR             | 62d  | 18 |
| FBgn0021765 | 694.08  | 97  | 1 | QGASVILADLPSSK              | 62d  | 18 |
| FBgn0021765 | 680.54  | 92  | 2 | NAVSLVTGGASGLGR             | 82d  | 18 |
| FBgn0021765 | 693.7   | 59  | 1 | QGASVILADLPSSK              | 102d | 18 |
| FBgn0021765 | 694.04  | 64  | 1 | QGASVILADLPSSK              | 112d | 18 |
| FBgn0021765 | 600.2   | 35  | 1 | AAVVGMTLPIAR                | 122d | 18 |
| FBgn0021765 | 975.97  | 44  | 1 | LGEPSEY AHLVQAIYENPLLNGEVIR | 122d | 18 |
| FBgn0021765 | 680.45  | 108 | 3 | NAVSLVTGGASGLGR             | 122d | 18 |
| FBgn0021765 | 693.93  | 75  | 3 | QGASVILADLPSSK              | 122d | 18 |
| FBgn0021765 | 880.02  | 66  | 1 | LSAGLMGANEPNQDGQR           | 132d | 18 |
| FBgn0021765 | 680.22  | 79  | 1 | NAVSLVTGGASGLGR             | 132d | 18 |
| FBgn0021765 | 693.64  | 66  | 1 | QGASVILADLPSSK              | 132d | 18 |
| FBgn0021765 | 600.44  | 47  | 2 | AAVVGMTLPIAR                | 142d | 18 |
| FBgn0021765 | 694     | 56  | 2 | QGASVILADLPSSK              | 142d | 18 |
| FBgn0021765 | 660.4   | 43  | 1 | VVFVPVDVTSEK                | 142d | 18 |
| FBgn0021765 | 879.9   | 76  | 2 | LSAGLMGANEPNQDGQR           | 2d   | 28 |
| FBgn0021765 | 680.29  | 81  | 5 | NAVSLVTGGASGLGR             | 2d   | 28 |
| FBgn0021765 | 1463.11 | 75  | 3 | LGEPSEY AHLVQAIYENPLLNGEVIR | 12d  | 28 |
| FBgn0021765 | 879.73  | 75  | 3 | LSAGLMGANEPNQDGQR           | 12d  | 28 |
| FBgn0021765 | 680.29  | 72  | 4 | NAVSLVTGGASGLGR             | 12d  | 28 |
| FBgn0021765 | 693.86  | 69  | 2 | QGASVILADLPSSK              | 12d  | 28 |



|             |         |    |   |                                        |      |    |
|-------------|---------|----|---|----------------------------------------|------|----|
| FBgn0021765 | 680.33  | 96 | 2 | NAVSLVTGGASGLGR                        | 22d  | 28 |
| FBgn0021765 | 879.7   | 51 | 3 | LSAGLMGANEPNQDGQR                      | 32d  | 28 |
| FBgn0021765 | 680.52  | 83 | 3 | NAVSLVTGGASGLGR                        | 32d  | 28 |
| FBgn0021765 | 660.3   | 39 | 1 | VVFVPVDVTSEK                           | 32d  | 28 |
| FBgn0021765 | 879.75  | 68 | 3 | LSAGLMGANEPNQDGQR                      | 36d  | 28 |
| FBgn0021765 | 680.58  | 93 | 5 | NAVSLVTGGASGLGR                        | 36d  | 28 |
| FBgn0021765 | 693.88  | 78 | 3 | QGASVILADLPSSK                         | 36d  | 28 |
| FBgn0021765 | 879.74  | 68 | 3 | LSAGLMGANEPNQDGQR                      | 42d  | 28 |
| FBgn0021765 | 680.27  | 87 | 5 | NAVSLVTGGASGLGR                        | 42d  | 28 |
| FBgn0021765 | 693.67  | 71 | 1 | QGASVILADLPSSK                         | 42d  | 28 |
| FBgn0021765 | 879.8   | 63 | 3 | LSAGLMGANEPNQDGQR                      | 46d  | 28 |
| FBgn0021765 | 680.45  | 88 | 6 | NAVSLVTGGASGLGR                        | 46d  | 28 |
| FBgn0021765 | 693.79  | 69 | 1 | QGASVILADLPSSK                         | 46d  | 28 |
| FBgn0021765 | 879.96  | 60 | 3 | LSAGLMGANEPNQDGQR                      | 50d  | 28 |
| FBgn0021765 | 680.38  | 79 | 3 | NAVSLVTGGASGLGR                        | 50d  | 28 |
| FBgn0021765 | 879.83  | 55 | 1 | LSAGLMGANEPNQDGQR                      | 52d  | 28 |
| FBgn0021765 | 680.49  | 82 | 4 | NAVSLVTGGASGLGR                        | 52d  | 28 |
| FBgn0021765 | 693.62  | 71 | 1 | QGASVILADLPSSK                         | 52d  | 28 |
| FBgn0021765 | 975.54  | 57 | 1 | LGEPSEYAHLVQAIYENPLLNGEVIR             | 56d  | 28 |
| FBgn0021765 | 680.47  | 86 | 2 | NAVSLVTGGASGLGR                        | 56d  | 28 |
| FBgn0021765 | 693.8   | 65 | 1 | QGASVILADLPSSK                         | 56d  | 28 |
| FBgn0021765 | 659.85  | 48 | 1 | VVFVPVDVTSEK                           | 56d  | 28 |
| FBgn0021873 | 393.7   | 35 | 1 | STAAPNPK                               | 32d  | 28 |
| FBgn0022097 | 882.51  | 81 | 1 | FTSGDINQVVLQNVTK                       | 42d  | 18 |
| FBgn0022097 | 882.65  | 57 | 1 | FTSGDINQVVLQNVTK                       | 2d   | 28 |
| FBgn0022160 | 929.55  | 41 | 1 | SFGDGDVSQEQLHEILR                      | 102d | 18 |
| FBgn0022343 | 701.4   | 37 | 1 | VQESTAAPVAASNR                         | 2d   | 18 |
| FBgn0022343 | 701.56  | 59 | 1 | VQESTAAPVAASNR                         | 2d   | 28 |
| FBgn0022349 | 1316.01 | 39 | 1 | GSSDTAQVDTPAIENVSAAPETEAAK             | 112d | 18 |
| FBgn0022349 | 1314.77 | 63 | 1 | EAESNTDESATPVPIDVSTAPASNDVSKPLEIDTTLVK | 2d   | 28 |
| FBgn0022349 | 1316.02 | 91 | 1 | GSSDTAQVDTPAIENVSAAPETEAAK             | 2d   | 28 |
| FBgn0022349 | 1314.77 | 50 | 1 | EAESNTDESATPVPIDVSTAPASNDVSKPLEIDTTLVK | 42d  | 28 |

|             |         |    |   |                                        |      |    |
|-------------|---------|----|---|----------------------------------------|------|----|
| FBgn0022349 | 1314.68 | 47 | 1 | EAESNTDESATPVPIDVSTAPASNDVSKPLEIDTTLVK | 52d  | 28 |
| FBgn0022355 | 791.91  | 73 | 3 | AQDDVLVAVAAPGVTR                       | 2d   | 18 |
| FBgn0022355 | 637.67  | 74 | 2 | VSADPQISATER                           | 2d   | 18 |
| FBgn0022355 | 995.26  | 73 | 3 | VSSSDDGEVQIVPASELEK                    | 2d   | 18 |
| FBgn0022355 | 1098.34 | 83 | 3 | NEIQNEQIYTDLQCNANK                     | 22d  | 18 |
| FBgn0022355 | 995.66  | 60 | 2 | VSSSDDGEVQIVPASELEK                    | 22d  | 18 |
| FBgn0022355 | 637.7   | 69 | 2 | VSADPQISATER                           | 42d  | 18 |
| FBgn0022355 | 995.54  | 62 | 3 | VSSSDDGEVQIVPASELEK                    | 42d  | 18 |
| FBgn0022355 | 468.1   | 43 | 2 | YEGIILVK                               | 42d  | 18 |
| FBgn0022355 | 792.12  | 58 | 1 | AQDDVLVAVAAPGVTR                       | 62d  | 18 |
| FBgn0022355 | 619.82  | 53 | 1 | FFANGLQAQNK                            | 62d  | 18 |
| FBgn0022355 | 995.65  | 69 | 2 | VSSSDDGEVQIVPASELEK                    | 62d  | 18 |
| FBgn0022355 | 468.24  | 45 | 3 | YEGIILVK                               | 62d  | 18 |
| FBgn0022355 | 792.07  | 67 | 2 | AQDDVLVAVAAPGVTR                       | 82d  | 18 |
| FBgn0022355 | 619.98  | 67 | 1 | FFANGLQAQNK                            | 82d  | 18 |
| FBgn0022355 | 656.33  | 43 | 1 | LCAQNDDFAK                             | 82d  | 18 |
| FBgn0022355 | 1098.41 | 81 | 1 | NEIQNEQIYTDLQCNANK                     | 82d  | 18 |
| FBgn0022355 | 662.77  | 63 | 1 | SDTTSVEQETVK                           | 82d  | 18 |
| FBgn0022355 | 638.02  | 76 | 2 | VSADPQISATER                           | 82d  | 18 |
| FBgn0022355 | 995.14  | 67 | 3 | VSSSDDGEVQIVPASELEK                    | 82d  | 18 |
| FBgn0022355 | 792.05  | 56 | 3 | AQDDVLVAVAAPGVTR                       | 102d | 18 |
| FBgn0022355 | 662.86  | 58 | 1 | SDTTSVEQETVK                           | 102d | 18 |
| FBgn0022355 | 637.58  | 73 | 1 | VSADPQISATER                           | 102d | 18 |
| FBgn0022355 | 995.38  | 54 | 2 | VSSSDDGEVQIVPASELEK                    | 102d | 18 |
| FBgn0022355 | 792.09  | 60 | 3 | AQDDVLVAVAAPGVTR                       | 112d | 18 |
| FBgn0022355 | 995.6   | 47 | 1 | VSSSDDGEVQIVPASELEK                    | 112d | 18 |
| FBgn0022355 | 792.09  | 54 | 2 | AQDDVLVAVAAPGVTR                       | 122d | 18 |
| FBgn0022355 | 493.75  | 34 | 1 | FSGYDGAIR                              | 122d | 18 |
| FBgn0022355 | 1098.68 | 79 | 2 | NEIQNEQIYTDLQCNANK                     | 122d | 18 |
| FBgn0022355 | 662.73  | 50 | 2 | SDTTSVEQETVK                           | 122d | 18 |
| FBgn0022355 | 638.06  | 83 | 3 | VSADPQISATER                           | 122d | 18 |
| FBgn0022355 | 995.71  | 58 | 1 | VSSSDDGEVQIVPASELEK                    | 122d | 18 |

|             |         |     |   |                    |      |    |
|-------------|---------|-----|---|--------------------|------|----|
| FBgn0022355 | 468.23  | 39  | 1 | YEGILVK            | 122d | 18 |
| FBgn0022355 | 413.17  | 41  | 1 | ATGYADAR           | 132d | 18 |
| FBgn0022355 | 738.62  | 54  | 2 | SNQLQPIVYEQR       | 132d | 18 |
| FBgn0022355 | 637.8   | 66  | 2 | VSADPQISATER       | 132d | 18 |
| FBgn0022355 | 995.66  | 57  | 3 | VSSDDGEVQIVPASELEK | 132d | 18 |
| FBgn0022355 | 413.1   | 49  | 2 | ATGYADAR           | 142d | 18 |
| FBgn0022355 | 757.47  | 40  | 1 | LVDVFALFGEFQK      | 142d | 18 |
| FBgn0022355 | 1098.5  | 60  | 1 | NEIQNEQIYTDLQCNANK | 142d | 18 |
| FBgn0022355 | 662.93  | 60  | 2 | SDTTSVEQETVK       | 142d | 18 |
| FBgn0022355 | 638.02  | 72  | 2 | VSADPQISATER       | 142d | 18 |
| FBgn0022355 | 995.64  | 59  | 3 | VSSDDGEVQIVPASELEK | 142d | 18 |
| FBgn0022355 | 468.44  | 39  | 1 | YEGILVK            | 142d | 18 |
| FBgn0022355 | 792.04  | 77  | 3 | AQDDVLVAVAAPGVTR   | 2d   | 28 |
| FBgn0022355 | 662.67  | 52  | 2 | SDTTSVEQETVK       | 2d   | 28 |
| FBgn0022355 | 637.71  | 79  | 4 | VSADPQISATER       | 2d   | 28 |
| FBgn0022355 | 995.47  | 64  | 2 | VSSDDGEVQIVPASELEK | 2d   | 28 |
| FBgn0022355 | 791.87  | 68  | 2 | AQDDVLVAVAAPGVTR   | 12d  | 28 |
| FBgn0022355 | 1098.43 | 105 | 3 | NEIQNEQIYTDLQCNANK | 12d  | 28 |
| FBgn0022355 | 738.55  | 53  | 2 | SNQLQPIVYEQR       | 12d  | 28 |
| FBgn0022355 | 637.93  | 83  | 3 | VSADPQISATER       | 12d  | 28 |
| FBgn0022355 | 995.26  | 56  | 3 | VSSDDGEVQIVPASELEK | 12d  | 28 |
| FBgn0022355 | 468.24  | 52  | 2 | YEGILVK            | 12d  | 28 |
| FBgn0022355 | 995.54  | 57  | 2 | VSSDDGEVQIVPASELEK | 22d  | 28 |
| FBgn0022355 | 619.86  | 50  | 1 | FFANGLQAQNK        | 32d  | 28 |
| FBgn0022355 | 1098.38 | 71  | 3 | NEIQNEQIYTDLQCNANK | 32d  | 28 |
| FBgn0022355 | 637.83  | 45  | 1 | VSADPQISATER       | 32d  | 28 |
| FBgn0022355 | 995.65  | 65  | 3 | VSSDDGEVQIVPASELEK | 32d  | 28 |
| FBgn0022355 | 468.22  | 45  | 2 | YEGILVK            | 32d  | 28 |
| FBgn0022355 | 1098.6  | 71  | 2 | NEIQNEQIYTDLQCNANK | 36d  | 28 |
| FBgn0022355 | 738.55  | 56  | 2 | SNQLQPIVYEQR       | 36d  | 28 |
| FBgn0022355 | 637.94  | 70  | 2 | VSADPQISATER       | 36d  | 28 |
| FBgn0022355 | 995.71  | 69  | 2 | VSSDDGEVQIVPASELEK | 36d  | 28 |

|             |         |     |   |                                 |      |    |
|-------------|---------|-----|---|---------------------------------|------|----|
| FBgn0022355 | 468.03  | 41  | 1 | YEGIILVK                        | 36d  | 28 |
| FBgn0022355 | 413.25  | 46  | 1 | ATGYADAR                        | 42d  | 28 |
| FBgn0022355 | 619.76  | 75  | 2 | FFANGLQAQNK                     | 42d  | 28 |
| FBgn0022355 | 1098.38 | 89  | 3 | NEIQNEQIYTDLQCNANK              | 42d  | 28 |
| FBgn0022355 | 637.67  | 77  | 6 | VSADPQISATER                    | 42d  | 28 |
| FBgn0022355 | 995.27  | 69  | 2 | VSSSDDGEVQIVPASELEK             | 42d  | 28 |
| FBgn0022355 | 468.09  | 43  | 3 | YEGIILVK                        | 42d  | 28 |
| FBgn0022355 | 791.91  | 64  | 1 | AQDDVLVAVAAPGVTR                | 46d  | 28 |
| FBgn0022355 | 619.81  | 74  | 2 | FFANGLQAQNK                     | 46d  | 28 |
| FBgn0022355 | 1098.34 | 73  | 2 | NEIQNEQIYTDLQCNANK              | 46d  | 28 |
| FBgn0022355 | 995.42  | 67  | 2 | VSSSDDGEVQIVPASELEK             | 46d  | 28 |
| FBgn0022355 | 468.27  | 41  | 1 | YEGIILVK                        | 46d  | 28 |
| FBgn0022355 | 791.84  | 67  | 2 | AQDDVLVAVAAPGVTR                | 50d  | 28 |
| FBgn0022355 | 1098.58 | 66  | 2 | NEIQNEQIYTDLQCNANK              | 50d  | 28 |
| FBgn0022355 | 637.76  | 54  | 1 | VSADPQISATER                    | 50d  | 28 |
| FBgn0022355 | 995.7   | 64  | 3 | VSSSDDGEVQIVPASELEK             | 50d  | 28 |
| FBgn0022355 | 792.06  | 77  | 2 | AQDDVLVAVAAPGVTR                | 52d  | 28 |
| FBgn0022355 | 1146.51 | 70  | 4 | DARPELECVQSTDCVVALTK            | 52d  | 28 |
| FBgn0022355 | 773.89  | 54  | 3 | DRVDCLELIEQR                    | 52d  | 28 |
| FBgn0022355 | 1123.97 | 49  | 2 | KYFGLPGAGPDAPPAEGNPENFEYLCEDGTR | 52d  | 28 |
| FBgn0022355 | 1098.65 | 83  | 3 | NEIQNEQIYTDLQCNANK              | 52d  | 28 |
| FBgn0022355 | 637.94  | 53  | 2 | VSADPQISATER                    | 52d  | 28 |
| FBgn0022355 | 995.39  | 67  | 2 | VSSSDDGEVQIVPASELEK             | 52d  | 28 |
| FBgn0022355 | 1621.05 | 40  | 1 | YFGLPGAGPDAPPAEGNPENFEYLCEDGTR  | 52d  | 28 |
| FBgn0022355 | 791.76  | 80  | 2 | AQDDVLVAVAAPGVTR                | 56d  | 28 |
| FBgn0022355 | 663.06  | 49  | 2 | SDTTSVEQETVK                    | 56d  | 28 |
| FBgn0022355 | 637.83  | 85  | 3 | VSADPQISATER                    | 56d  | 28 |
| FBgn0022355 | 995.28  | 78  | 3 | VSSSDDGEVQIVPASELEK             | 56d  | 28 |
| FBgn0022361 | 694.82  | 37  | 1 | NFYFDIGQNNR                     | 122d | 18 |
| FBgn0022361 | 897.44  | 58  | 1 | DALTDLLEEFGANDGGR               | 2d   | 28 |
| FBgn0022382 | 832.36  | 134 | 1 | PEADDDDDGATAVFPK                | 2d   | 18 |
| FBgn0022382 | 1273.61 | 68  | 3 | SVFAEAYDPEADDDDDGATAVFPK        | 2d   | 18 |

|             |         |     |   |                                       |      |    |
|-------------|---------|-----|---|---------------------------------------|------|----|
| FBgn0022382 | 1273.35 | 71  | 3 | SVFAEAYDPEADDDDDGATAVFPK              | 42d  | 18 |
| FBgn0022382 | 832.28  | 71  | 1 | PEADDDDDGATAVFPK                      | 62d  | 18 |
| FBgn0022382 | 1273.75 | 107 | 2 | SVFAEAYDPEADDDDDGATAVFPK              | 62d  | 18 |
| FBgn0022382 | 1273.5  | 82  | 2 | SVFAEAYDPEADDDDDGATAVFPK              | 82d  | 18 |
| FBgn0022382 | 1273.62 | 68  | 1 | SVFAEAYDPEADDDDDGATAVFPK              | 102d | 18 |
| FBgn0022382 | 1273.7  | 53  | 1 | SVFAEAYDPEADDDDDGATAVFPK              | 112d | 18 |
| FBgn0022382 | 1273.47 | 64  | 1 | SVFAEAYDPEADDDDDGATAVFPK              | 132d | 18 |
| FBgn0022382 | 849.31  | 34  | 1 | SVFAEAYDPEADDDDDGATAVFPK              | 142d | 18 |
| FBgn0022382 | 1273.66 | 86  | 5 | SVFAEAYDPEADDDDDGATAVFPK              | 2d   | 28 |
| FBgn0022382 | 839.87  | 50  | 1 | MDQDDAEVEISQLGK                       | 12d  | 28 |
| FBgn0022382 | 832.53  | 75  | 1 | PEADDDDDGATAVFPK                      | 12d  | 28 |
| FBgn0022382 | 1273.53 | 81  | 4 | SVFAEAYDPEADDDDDGATAVFPK              | 12d  | 28 |
| FBgn0022382 | 839.93  | 78  | 2 | MDQDDAEVEISQLGK                       | 36d  | 28 |
| FBgn0022382 | 1273.61 | 63  | 1 | SVFAEAYDPEADDDDDGATAVFPK              | 36d  | 28 |
| FBgn0022382 | 1273.4  | 83  | 2 | SVFAEAYDPEADDDDDGATAVFPK              | 42d  | 28 |
| FBgn0022382 | 531.86  | 52  | 1 | MNLADALVSK                            | 46d  | 28 |
| FBgn0022382 | 1273.33 | 83  | 3 | SVFAEAYDPEADDDDDGATAVFPK              | 50d  | 28 |
| FBgn0022382 | 806.55  | 73  | 2 | EQMNQVLDAMFER                         | 56d  | 28 |
| FBgn0022382 | 1273.34 | 77  | 1 | SVFAEAYDPEADDDDDGATAVFPK              | 56d  | 28 |
| FBgn0022708 | 568.73  | 38  | 1 | NGFLLDGFPR                            | 22d  | 18 |
| FBgn0022708 | 1203.65 | 59  | 1 | LVSDDL VVDMIDS NLDKPECK               | 52d  | 28 |
| FBgn0022708 | 801.59  | 66  | 1 | SSDVFSTIDSIFQR                        | 56d  | 28 |
| FBgn0022709 | 733.98  | 53  | 2 | YGFTHLSSGDLR                          | 42d  | 28 |
| FBgn0022740 | 732.5   | 47  | 1 | LKTKLPNIPPDTK                         | 32d  | 28 |
| FBgn0022893 | 1608.45 | 72  | 1 | ESSEAVLPAVENGSEEV TNGDSTDAPAIEAVK     | 2d   | 18 |
| FBgn0022959 | 1307.49 | 45  | 1 | DGEVEGEDAESSAQQQQQQAAPIVDGQPQQQVQSGPR | 102d | 18 |
| FBgn0022959 | 1307.73 | 94  | 2 | DGEVEGEDAESSAQQQQQQAAPIVDGQPQQQVQSGPR | 2d   | 28 |
| FBgn0022959 | 1307.67 | 56  | 1 | DGEVEGEDAESSAQQQQQQAAPIVDGQPQQQVQSGPR | 12d  | 28 |
| FBgn0022959 | 1307.75 | 53  | 1 | DGEVEGEDAESSAQQQQQQAAPIVDGQPQQQVQSGPR | 42d  | 28 |
| FBgn0023023 | 758.8   | 56  | 3 | FVGPSSEITIPGGVR                       | 2d   | 18 |
| FBgn0023023 | 758.99  | 49  | 1 | FVGPSSEITIPGGVR                       | 22d  | 18 |
| FBgn0023023 | 1044.96 | 42  | 1 | FIPTPVRPPFVYDIIEGK                    | 62d  | 18 |

|             |         |     |   |                        |      |    |
|-------------|---------|-----|---|------------------------|------|----|
| FBgn0023023 | 758.47  | 43  | 2 | FVGPSSEITIPGGVR        | 102d | 18 |
| FBgn0023023 | 759     | 56  | 1 | FVGPSSEITIPGGVR        | 112d | 18 |
| FBgn0023023 | 949.3   | 75  | 1 | GLYQLNDSDLLDVFER       | 122d | 18 |
| FBgn0023023 | 949.71  | 66  | 1 | GLYQLNDSDLLDVFER       | 142d | 18 |
| FBgn0023023 | 758.86  | 56  | 1 | FVGPSSEITIPGGVR        | 2d   | 28 |
| FBgn0023023 | 949.48  | 34  | 1 | GLYQLNDSDLLDVFER       | 2d   | 28 |
| FBgn0023023 | 758.75  | 61  | 1 | FVGPSSEITIPGGVR        | 12d  | 28 |
| FBgn0023023 | 949.55  | 42  | 1 | GLYQLNDSDLLDVFER       | 12d  | 28 |
| FBgn0023023 | 758.78  | 39  | 1 | FVGPSSEITIPGGVR        | 42d  | 28 |
| FBgn0023023 | 1045.1  | 39  | 1 | FIPTPVRPPFVYDIIEGK     | 52d  | 28 |
| FBgn0023143 | 769.08  | 52  | 1 | LPGIQPLEILDSIK         | 22d  | 18 |
| FBgn0023143 | 1105.67 | 64  | 1 | IIPAIATTTSVLSGLAVLEVIK | 42d  | 18 |
| FBgn0023143 | 768.81  | 40  | 1 | LPGIQPLEILDSIK         | 42d  | 18 |
| FBgn0023143 | 769.07  | 66  | 1 | LPGIQPLEILDSIK         | 102d | 18 |
| FBgn0023143 | 768.8   | 50  | 1 | LPGIQPLEILDSIK         | 2d   | 28 |
| FBgn0023143 | 787.7   | 68  | 2 | VVVLTNSDGEEQQR         | 2d   | 28 |
| FBgn0023143 | 769.1   | 51  | 3 | LPGIQPLEILDSIK         | 36d  | 28 |
| FBgn0023143 | 768.87  | 51  | 1 | LPGIQPLEILDSIK         | 46d  | 28 |
| FBgn0023175 | 854.97  | 71  | 3 | VTGGLHLINPSELTEK       | 2d   | 18 |
| FBgn0023211 | 666.24  | 66  | 3 | LISSDGHEFVVK           | 2d   | 28 |
| FBgn0023215 | 1163.74 | 34  | 1 | MSGIGGIGVLLAAQFLEQHEK  | 22d  | 18 |
| FBgn0023388 | 882.86  | 102 | 2 | KEDINTNDVQMSELK        | 2d   | 18 |
| FBgn0023388 | 754.49  | 51  | 2 | TDSGWWEDELQAK          | 42d  | 18 |
| FBgn0023388 | 1126.25 | 91  | 3 | AQNDELDFDKDDIISVLGR    | 62d  | 18 |
| FBgn0023388 | 1125.94 | 64  | 1 | AQNDELDFDKDDIISVLGR    | 112d | 18 |
| FBgn0023388 | 754.55  | 47  | 1 | TDSGWWEDELQAK          | 122d | 18 |
| FBgn0023388 | 880.44  | 37  | 1 | IPVTLPQEWVPPNLR        | 2d   | 28 |
| FBgn0023388 | 882.72  | 98  | 3 | KEDINTNDVQMSELK        | 2d   | 28 |
| FBgn0023388 | 882.79  | 72  | 1 | KEDINTNDVQMSELK        | 12d  | 28 |
| FBgn0023388 | 882.97  | 60  | 1 | KEDINTNDVQMSELK        | 50d  | 28 |
| FBgn0023388 | 1125.96 | 70  | 1 | AQNDELDFDKDDIISVLGR    | 52d  | 28 |
| FBgn0023458 | 718.25  | 35  | 1 | WQDFALSILIAR           | 132d | 18 |

|             |         |    |   |                                  |      |    |
|-------------|---------|----|---|----------------------------------|------|----|
| FBgn0023477 | 720.43  | 49 | 1 | ILDWYVANTDTK                     | 112d | 18 |
| FBgn0023477 | 720.39  | 48 | 1 | ILDWYVANTDTK                     | 36d  | 28 |
| FBgn0023512 | 649.74  | 36 | 1 | FDKGTAATLVFK                     | 32d  | 28 |
| FBgn0023514 | 543.52  | 37 | 1 | TGTDLMRYK                        | 36d  | 28 |
| FBgn0023529 | 567.38  | 35 | 1 | ALKGMIDGAEK                      | 42d  | 28 |
| FBgn0023535 | 1048.37 | 75 | 1 | TNEWIDVHDPATNQVVTR               | 2d   | 18 |
| FBgn0023535 | 699.44  | 58 | 1 | TNEWIDVHDPATNQVVTR               | 22d  | 18 |
| FBgn0023535 | 1048.28 | 63 | 1 | TNEWIDVHDPATNQVVTR               | 42d  | 18 |
| FBgn0023535 | 635.81  | 44 | 1 | VNAGHVPGTDVGPVISAASR             | 42d  | 18 |
| FBgn0023535 | 1344.15 | 52 | 2 | ITVPGYEDGYFVGPTILSDVTPSMK        | 122d | 18 |
| FBgn0023535 | 1344.19 | 38 | 1 | ITVPGYEDGYFVGPTILSDVTPSMK        | 132d | 18 |
| FBgn0023535 | 699.5   | 47 | 1 | TNEWIDVHDPATNQVVTR               | 142d | 18 |
| FBgn0023535 | 810.84  | 79 | 3 | ATQAEMQAALSNKK                   | 2d   | 28 |
| FBgn0023535 | 1048.38 | 64 | 3 | TNEWIDVHDPATNQVVTR               | 2d   | 28 |
| FBgn0023535 | 635.8   | 53 | 3 | VNAGHVPGTDVGPVISAASR             | 2d   | 28 |
| FBgn0023535 | 810.77  | 61 | 1 | ATQAEMQAALSNKK                   | 12d  | 28 |
| FBgn0023535 | 1344.18 | 36 | 1 | ITVPGYEDGYFVGPTILSDVTPSMK        | 12d  | 28 |
| FBgn0023535 | 952.96  | 45 | 1 | VNAGHVPGTDVGPVISAASR             | 12d  | 28 |
| FBgn0023535 | 1048.36 | 69 | 3 | TNEWIDVHDPATNQVVTR               | 22d  | 28 |
| FBgn0023535 | 699.43  | 57 | 2 | TNEWIDVHDPATNQVVTR               | 32d  | 28 |
| FBgn0023535 | 1344.2  | 47 | 1 | ITVPGYEDGYFVGPTILSDVTPSMK        | 36d  | 28 |
| FBgn0023535 | 699.45  | 46 | 1 | TNEWIDVHDPATNQVVTR               | 36d  | 28 |
| FBgn0023535 | 1344.03 | 73 | 1 | ITVPGYEDGYFVGPTILSDVTPSMK        | 42d  | 28 |
| FBgn0023535 | 1048.4  | 64 | 3 | TNEWIDVHDPATNQVVTR               | 42d  | 28 |
| FBgn0023535 | 1048.41 | 49 | 3 | TNEWIDVHDPATNQVVTR               | 46d  | 28 |
| FBgn0023535 | 699.23  | 50 | 1 | TNEWIDVHDPATNQVVTR               | 50d  | 28 |
| FBgn0023535 | 1048.36 | 42 | 1 | TNEWIDVHDPATNQVVTR               | 52d  | 28 |
| FBgn0023542 | 372.95  | 40 | 1 | QRAENK                           | 22d  | 18 |
| FBgn0024183 | 1568.64 | 47 | 1 | YELLFMDDDVSDPLDNLVAPTAASAAAAAAGK | 2d   | 18 |
| FBgn0024211 | 1041.71 | 34 | 1 | TTAYNLLGEPLLLNRTHR               | 122d | 18 |
| FBgn0024234 | 483.67  | 42 | 1 | NFITDLDK                         | 62d  | 18 |
| FBgn0024234 | 483.58  | 47 | 1 | NFITDLDK                         | 132d | 18 |

|             |         |     |   |                             |      |    |
|-------------|---------|-----|---|-----------------------------|------|----|
| FBgn0024289 | 793.03  | 51  | 3 | DNLTAVLHGIEDMR              | 2d   | 18 |
| FBgn0024289 | 717.03  | 98  | 1 | DQTAEETAFLVQK               | 102d | 18 |
| FBgn0024289 | 716.67  | 103 | 3 | DQTAEETAFLVQK               | 122d | 18 |
| FBgn0024289 | 792.81  | 55  | 2 | DNLTAVLHGIEDMR              | 42d  | 28 |
| FBgn0024332 | 744.96  | 36  | 1 | LRSQEADETDVAR               | 32d  | 28 |
| FBgn0024556 | 1179.15 | 43  | 1 | DGNLTLGTGVVTSTLPPLTESQR     | 2d   | 18 |
| FBgn0024556 | 954.74  | 63  | 1 | ELLTEMGYDGDKIPVVK           | 2d   | 18 |
| FBgn0024556 | 1450.76 | 55  | 2 | STVTGVEMFHQILEEAQAGDQLGALVR | 2d   | 18 |
| FBgn0024556 | 1179.21 | 41  | 1 | DGNLTLGTGVVTSTLPPLTESQR     | 22d  | 18 |
| FBgn0024556 | 1179.07 | 88  | 2 | DGNLTLGTGVVTSTLPPLTESQR     | 42d  | 18 |
| FBgn0024556 | 1179.32 | 95  | 1 | DGNLTLGTGVVTSTLPPLTESQR     | 62d  | 18 |
| FBgn0024556 | 1178.6  | 59  | 1 | DGNLTLGTGVVTSTLPPLTESQR     | 82d  | 18 |
| FBgn0024556 | 1178.97 | 85  | 1 | DGNLTLGTGVVTSTLPPLTESQR     | 102d | 18 |
| FBgn0024556 | 786.44  | 34  | 1 | DGNLTLGTGVVTSTLPPLTESQR     | 112d | 18 |
| FBgn0024556 | 1178.45 | 34  | 1 | DGNLTLGTGVVTSTLPPLTESQR     | 122d | 18 |
| FBgn0024556 | 786.49  | 45  | 1 | DGNLTLGTGVVTSTLPPLTESQR     | 132d | 18 |
| FBgn0024556 | 1178.9  | 51  | 1 | DGNLTLGTGVVTSTLPPLTESQR     | 142d | 18 |
| FBgn0024556 | 1179.31 | 63  | 2 | DGNLTLGTGVVTSTLPPLTESQR     | 2d   | 28 |
| FBgn0024556 | 954.72  | 52  | 1 | ELLTEMGYDGDKIPVVK           | 2d   | 28 |
| FBgn0024556 | 1179.19 | 76  | 2 | DGNLTLGTGVVTSTLPPLTESQR     | 12d  | 28 |
| FBgn0024556 | 1178.93 | 67  | 3 | DGNLTLGTGVVTSTLPPLTESQR     | 32d  | 28 |
| FBgn0024556 | 1179.32 | 72  | 2 | DGNLTLGTGVVTSTLPPLTESQR     | 36d  | 28 |
| FBgn0024556 | 1179.28 | 84  | 3 | DGNLTLGTGVVTSTLPPLTESQR     | 42d  | 28 |
| FBgn0024556 | 1179.17 | 76  | 3 | DGNLTLGTGVVTSTLPPLTESQR     | 46d  | 28 |
| FBgn0024556 | 1179.1  | 85  | 2 | DGNLTLGTGVVTSTLPPLTESQR     | 50d  | 28 |
| FBgn0024556 | 1179.35 | 45  | 2 | DGNLTLGTGVVTSTLPPLTESQR     | 52d  | 28 |
| FBgn0024556 | 1179.08 | 63  | 2 | DGNLTLGTGVVTSTLPPLTESQR     | 56d  | 28 |
| FBgn0024556 | 808.09  | 45  | 1 | LLQEVDSEFIPTVR              | 56d  | 28 |
| FBgn0024832 | 1155.1  | 42  | 1 | WTRPPISMNFVFPFAPSGFK        | 2d   | 18 |
| FBgn0024841 | 834.99  | 51  | 1 | LQPLLDAGWTLVEGR             | 36d  | 28 |
| FBgn0024891 | 833.11  | 40  | 1 | VGPLPW LAPATDDAIK           | 56d  | 28 |
| FBgn0024897 | 374.36  | 35  | 1 | LNYP LK                     | 82d  | 18 |



|             |         |    |   |                        |      |    |
|-------------|---------|----|---|------------------------|------|----|
| FBgn0024923 | 912.95  | 50 | 1 | ELQELVQYPVEHPDK        | 2d   | 18 |
| FBgn0024923 | 1138.26 | 85 | 2 | ETVVEVPNTTWTDIGGLESVK  | 2d   | 18 |
| FBgn0024923 | 772.3   | 44 | 1 | LDQLIYIPLPDDK          | 2d   | 18 |
| FBgn0024923 | 1080.56 | 97 | 3 | LIVEEAQNDDNSVVSLSQAK   | 2d   | 18 |
| FBgn0024923 | 914.74  | 53 | 1 | NSPAIIFIDEIDAIAPK      | 2d   | 18 |
| FBgn0024923 | 1137.93 | 87 | 1 | ETVVEVPNTTWTDIGGLESVK  | 22d  | 18 |
| FBgn0024923 | 1137.9  | 44 | 1 | ETVVEVPNTTWTDIGGLESVK  | 42d  | 18 |
| FBgn0024923 | 914.69  | 69 | 5 | NSPAIIFIDEIDAIAPK      | 42d  | 18 |
| FBgn0024923 | 914.45  | 55 | 1 | NSPAIIFIDEIDAIAPK      | 62d  | 18 |
| FBgn0024923 | 914.48  | 48 | 1 | NSPAIIFIDEIDAIAPK      | 82d  | 18 |
| FBgn0024923 | 914.36  | 38 | 1 | NSPAIIFIDEIDAIAPK      | 102d | 18 |
| FBgn0024923 | 1138.3  | 56 | 1 | ETVVEVPNTTWTDIGGLESVK  | 112d | 18 |
| FBgn0024923 | 914.32  | 58 | 1 | NSPAIIFIDEIDAIAPK      | 112d | 18 |
| FBgn0024923 | 912.96  | 63 | 1 | ELQELVQYPVEHPDK        | 132d | 18 |
| FBgn0024923 | 1138.25 | 68 | 1 | ETVVEVPNTTWTDIGGLESVK  | 142d | 18 |
| FBgn0024923 | 914.67  | 69 | 1 | NSPAIIFIDEIDAIAPK      | 142d | 18 |
| FBgn0024923 | 912.94  | 65 | 2 | ELQELVQYPVEHPDK        | 2d   | 28 |
| FBgn0024923 | 1137.94 | 68 | 3 | ETVVEVPNTTWTDIGGLESVK  | 2d   | 28 |
| FBgn0024923 | 772.28  | 52 | 1 | LDQLIYIPLPDDK          | 2d   | 28 |
| FBgn0024923 | 914.23  | 58 | 1 | NSPAIIFIDEIDAIAPK      | 2d   | 28 |
| FBgn0024923 | 914.24  | 39 | 1 | NSPAIIFIDEIDAIAPK      | 12d  | 28 |
| FBgn0024923 | 1138.15 | 66 | 1 | ETVVEVPNTTWTDIGGLESVK  | 22d  | 28 |
| FBgn0024923 | 1202.14 | 68 | 2 | ETVVEVPNTTWTDIGGLESVKK | 22d  | 28 |
| FBgn0024923 | 1137.74 | 61 | 1 | ETVVEVPNTTWTDIGGLESVK  | 46d  | 28 |
| FBgn0024923 | 914.32  | 36 | 1 | NSPAIIFIDEIDAIAPK      | 46d  | 28 |
| FBgn0024923 | 914.67  | 53 | 2 | NSPAIIFIDEIDAIAPK      | 56d  | 28 |
| FBgn0024939 | 534.13  | 49 | 2 | GAPLAVVHFR             | 2d   | 18 |
| FBgn0024939 | 534.19  | 37 | 1 | GAPLAVVHFR             | 2d   | 28 |
| FBgn0024939 | 860.75  | 70 | 1 | TSGNYATVIAHNQDTK       | 2d   | 28 |
| FBgn0024957 | 641.61  | 55 | 1 | VVFENDATDGSK           | 2d   | 28 |
| FBgn0024957 | 691.16  | 44 | 1 | TVHIPSQEELDIFDAAER     | 12d  | 28 |
| FBgn0024957 | 1136.73 | 56 | 1 | GFAIAPEAQSAFGEFQWDDGK  | 56d  | 28 |

|             |         |    |   |                                    |      |    |
|-------------|---------|----|---|------------------------------------|------|----|
| FBgn0025352 | 1266.63 | 65 | 1 | DFLFVSQDPVNQLLLGPAYGIPK            | 2d   | 18 |
| FBgn0025352 | 1267    | 42 | 2 | QLGLKPKAYLRDFLFVSQDPVNQLLLGPAYGIPK | 2d   | 18 |
| FBgn0025352 | 1266.85 | 45 | 1 | DFLFVSQDPVNQLLLGPAYGIPK            | 42d  | 18 |
| FBgn0025352 | 594.29  | 40 | 2 | GYFTDLVPFK                         | 42d  | 18 |
| FBgn0025352 | 1267.06 | 35 | 1 | QLGLKPKAYLRDFLFVSQDPVNQLLLGPAYGIPK | 42d  | 18 |
| FBgn0025352 | 808.2   | 78 | 2 | VSGVDQIVDKDNGIR                    | 42d  | 18 |
| FBgn0025352 | 1266.77 | 71 | 3 | DFLFVSQDPVNQLLLGPAYGIPK            | 62d  | 18 |
| FBgn0025352 | 594.01  | 38 | 1 | GYFTDLVPFK                         | 62d  | 18 |
| FBgn0025352 | 1267.18 | 49 | 1 | QLGLKPKAYLRDFLFVSQDPVNQLLLGPAYGIPK | 62d  | 18 |
| FBgn0025352 | 808.26  | 66 | 1 | VSGVDQIVDKDNGIR                    | 62d  | 18 |
| FBgn0025352 | 1267.42 | 46 | 1 | QLGLKPKAYLRDFLFVSQDPVNQLLLGPAYGIPK | 82d  | 18 |
| FBgn0025352 | 808.37  | 59 | 1 | VSGVDQIVDKDNGIR                    | 82d  | 18 |
| FBgn0025352 | 1266.78 | 56 | 2 | DFLFVSQDPVNQLLLGPAYGIPK            | 102d | 18 |
| FBgn0025352 | 594.14  | 42 | 1 | GYFTDLVPFK                         | 102d | 18 |
| FBgn0025352 | 1267    | 38 | 1 | QLGLKPKAYLRDFLFVSQDPVNQLLLGPAYGIPK | 102d | 18 |
| FBgn0025352 | 1266.83 | 62 | 2 | DFLFVSQDPVNQLLLGPAYGIPK            | 112d | 18 |
| FBgn0025352 | 593.95  | 44 | 1 | GYFTDLVPFK                         | 112d | 18 |
| FBgn0025352 | 808.21  | 37 | 1 | VSGVDQIVDKDNGIR                    | 112d | 18 |
| FBgn0025352 | 594.02  | 47 | 2 | GYFTDLVPFK                         | 122d | 18 |
| FBgn0025352 | 1267.42 | 52 | 2 | QLGLKPKAYLRDFLFVSQDPVNQLLLGPAYGIPK | 122d | 18 |
| FBgn0025352 | 808.2   | 35 | 1 | VSGVDQIVDKDNGIR                    | 122d | 18 |
| FBgn0025352 | 1265.87 | 56 | 2 | DFLFVSQDPVNQLLLGPAYGIPK            | 132d | 18 |
| FBgn0025352 | 593.94  | 44 | 2 | GYFTDLVPFK                         | 142d | 18 |
| FBgn0025352 | 1267.34 | 43 | 1 | QLGLKPKAYLRDFLFVSQDPVNQLLLGPAYGIPK | 142d | 18 |
| FBgn0025352 | 1266.35 | 34 | 1 | DFLFVSQDPVNQLLLGPAYGIPK            | 2d   | 28 |
| FBgn0025352 | 808.43  | 53 | 3 | VSGVDQIVDKDNGIR                    | 2d   | 28 |
| FBgn0025352 | 1266.87 | 46 | 1 | DFLFVSQDPVNQLLLGPAYGIPK            | 12d  | 28 |
| FBgn0025352 | 658.01  | 60 | 2 | NSQNIVLVDGVR                       | 12d  | 28 |
| FBgn0025352 | 808.49  | 65 | 1 | VSGVDQIVDKDNGIR                    | 12d  | 28 |
| FBgn0025352 | 594.32  | 47 | 2 | GYFTDLVPFK                         | 32d  | 28 |
| FBgn0025352 | 594.28  | 48 | 3 | GYFTDLVPFK                         | 36d  | 28 |
| FBgn0025352 | 657.72  | 44 | 2 | NSQNIVLVDGVR                       | 36d  | 28 |

|             |         |     |   |                                    |      |    |
|-------------|---------|-----|---|------------------------------------|------|----|
| FBgn0025352 | 1266.67 | 69  | 2 | DFLFVSQDPVNQLLLGPAYGIPK            | 42d  | 28 |
| FBgn0025352 | 594.15  | 37  | 1 | GYFTDLVPEFK                        | 42d  | 28 |
| FBgn0025352 | 808.29  | 53  | 1 | VSGVDQIVDKDNGIR                    | 42d  | 28 |
| FBgn0025352 | 594.3   | 37  | 1 | GYFTDLVPEFK                        | 46d  | 28 |
| FBgn0025352 | 594.36  | 67  | 2 | GYFTDLVPEFK                        | 50d  | 28 |
| FBgn0025352 | 808.4   | 65  | 1 | VSGVDQIVDKDNGIR                    | 50d  | 28 |
| FBgn0025352 | 594.34  | 50  | 1 | GYFTDLVPEFK                        | 52d  | 28 |
| FBgn0025352 | 1267.12 | 35  | 1 | QLGLKPKAYLRDFLFVSQDPVNQLLLGPAYGIPK | 52d  | 28 |
| FBgn0025352 | 808.35  | 58  | 2 | VSGVDQIVDKDNGIR                    | 52d  | 28 |
| FBgn0025352 | 1266.76 | 54  | 5 | DFLFVSQDPVNQLLLGPAYGIPK            | 56d  | 28 |
| FBgn0025352 | 594.04  | 43  | 2 | GYFTDLVPEFK                        | 56d  | 28 |
| FBgn0025525 | 858.11  | 41  | 1 | FDIPYPTFVLYANR                     | 56d  | 28 |
| FBgn0025680 | 1118.01 | 56  | 1 | FLLDSLQDIDDQLQAATDGR               | 42d  | 18 |
| FBgn0025680 | 1118.25 | 107 | 1 | FLLDSLQDIDDQLQAATDGR               | 112d | 18 |
| FBgn0025687 | 891.16  | 54  | 1 | SLDFLPGFALEGFPNR                   | 56d  | 28 |
| FBgn0025698 | 1003.22 | 69  | 1 | GLASGVFYDNIFPSFLEK                 | 2d   | 18 |
| FBgn0025698 | 1003.24 | 55  | 1 | GLASGVFYDNIFPSFLEK                 | 42d  | 18 |
| FBgn0025698 | 908.53  | 86  | 4 | NYMEFLEVLTGLEK                     | 42d  | 18 |
| FBgn0025698 | 1003.15 | 38  | 1 | GLASGVFYDNIFPSFLEK                 | 142d | 18 |
| FBgn0025698 | 1002.99 | 48  | 1 | GLASGVFYDNIFPSFLEK                 | 2d   | 28 |
| FBgn0025698 | 908.59  | 42  | 1 | NYMEFLEVLTGLEK                     | 12d  | 28 |
| FBgn0025742 | 902.73  | 48  | 1 | DQEPPVVVDVPLGVIAR                  | 2d   | 18 |
| FBgn0025742 | 712.45  | 34  | 1 | LQANAFPLSYSGR                      | 42d  | 18 |
| FBgn0025742 | 902.68  | 36  | 1 | DQEPPVVVDVPLGVIAR                  | 132d | 18 |
| FBgn0025742 | 902.55  | 37  | 1 | DQEPPVVVDVPLGVIAR                  | 56d  | 28 |
| FBgn0025777 | 896.87  | 87  | 1 | LTSALQESTANVDEWK                   | 22d  | 18 |
| FBgn0025777 | 498.4   | 61  | 1 | FGQWSDVR                           | 62d  | 18 |
| FBgn0025777 | 897.18  | 61  | 1 | LTSALQESTANVDEWK                   | 112d | 18 |
| FBgn0025777 | 896.7   | 38  | 1 | LTSALQESTANVDEWK                   | 2d   | 28 |
| FBgn0025777 | 896.97  | 73  | 1 | LTSALQESTANVDEWK                   | 22d  | 28 |
| FBgn0025777 | 896.76  | 63  | 1 | LTSALQESTANVDEWK                   | 32d  | 28 |
| FBgn0025777 | 896.94  | 49  | 1 | LTSALQESTANVDEWK                   | 50d  | 28 |

|             |         |     |   |                        |      |    |
|-------------|---------|-----|---|------------------------|------|----|
| FBgn0025839 | 755     | 40  | 1 | EVLPPIDLVEQQK          | 42d  | 18 |
| FBgn0025865 | 1077.69 | 51  | 1 | EEPTASTTSAAVAPTPTVVPAR | 102d | 18 |
| FBgn0025885 | 1202.49 | 79  | 2 | VQVDDEFITTDYDYQTSHVK   | 2d   | 18 |
| FBgn0025885 | 563.78  | 37  | 1 | NVFIAGDDFK             | 142d | 18 |
| FBgn0026084 | 686.1   | 64  | 2 | IILPTAEDVAAEK          | 2d   | 28 |
| FBgn0026141 | 1242.96 | 114 | 2 | NADMSEEMQQDAVDCATQALEK | 2d   | 18 |
| FBgn0026141 | 1242.93 | 51  | 1 | NADMSEEMQQDAVDCATQALEK | 22d  | 18 |
| FBgn0026141 | 656.27  | 58  | 1 | NFGSYVTHETR            | 42d  | 18 |
| FBgn0026141 | 1242.96 | 97  | 3 | NADMSEEMQQDAVDCATQALEK | 2d   | 28 |
| FBgn0026141 | 1242.8  | 105 | 3 | NADMSEEMQQDAVDCATQALEK | 12d  | 28 |
| FBgn0026141 | 656.56  | 44  | 1 | NFGSYVTHETR            | 22d  | 28 |
| FBgn0026141 | 656.52  | 43  | 1 | NFGSYVTHETR            | 32d  | 28 |
| FBgn0026141 | 1242.92 | 95  | 1 | NADMSEEMQQDAVDCATQALEK | 36d  | 28 |
| FBgn0026141 | 1242.91 | 93  | 1 | NADMSEEMQQDAVDCATQALEK | 42d  | 28 |
| FBgn0026141 | 1242.81 | 108 | 2 | NADMSEEMQQDAVDCATQALEK | 50d  | 28 |
| FBgn0026141 | 1243.04 | 90  | 2 | NADMSEEMQQDAVDCATQALEK | 52d  | 28 |
| FBgn0026141 | 1242.87 | 85  | 1 | NADMSEEMQQDAVDCATQALEK | 56d  | 28 |
| FBgn0026141 | 656.32  | 46  | 1 | NFGSYVTHETR            | 56d  | 28 |
| FBgn0026170 | 659.91  | 83  | 1 | VLGQDNAVVQFK           | 2d   | 18 |
| FBgn0026188 | 1190.92 | 47  | 2 | EESGSYVQISQKPTDVSQER   | 2d   | 18 |
| FBgn0026188 | 910.94  | 37  | 1 | NVEVPEVIIGAILGPSGR     | 2d   | 18 |
| FBgn0026188 | 911.01  | 38  | 1 | NVEVPEVIIGAILGPSGR     | 22d  | 18 |
| FBgn0026188 | 911.02  | 62  | 1 | NVEVPEVIIGAILGPSGR     | 2d   | 28 |
| FBgn0026210 | 674.68  | 67  | 2 | APSSLLDALEQHLATLEGR    | 2d   | 18 |
| FBgn0026210 | 674.65  | 67  | 1 | APSSLLDALEQHLATLEGR    | 22d  | 18 |
| FBgn0026210 | 1011.66 | 107 | 2 | APSSLLDALEQHLATLEGR    | 42d  | 18 |
| FBgn0026210 | 1011.78 | 86  | 2 | APSSLLDALEQHLATLEGR    | 62d  | 18 |
| FBgn0026210 | 1011.71 | 84  | 3 | APSSLLDALEQHLATLEGR    | 82d  | 18 |
| FBgn0026210 | 674.83  | 53  | 1 | APSSLLDALEQHLATLEGR    | 112d | 18 |
| FBgn0026210 | 1011.54 | 83  | 2 | APSSLLDALEQHLATLEGR    | 122d | 18 |
| FBgn0026210 | 674.65  | 42  | 1 | APSSLLDALEQHLATLEGR    | 132d | 18 |
| FBgn0026210 | 1011.3  | 45  | 1 | APSSLLDALEQHLATLEGR    | 142d | 18 |

|             |         |    |   |                     |      |    |
|-------------|---------|----|---|---------------------|------|----|
| FBgn0026210 | 674.71  | 58 | 1 | APSSLLDALEQHLATLEGR | 2d   | 28 |
| FBgn0026210 | 674.73  | 79 | 3 | APSSLLDALEQHLATLEGR | 12d  | 28 |
| FBgn0026210 | 893.18  | 41 | 2 | VAENVGIDKGDIPDLTK   | 12d  | 28 |
| FBgn0026210 | 674.61  | 52 | 2 | APSSLLDALEQHLATLEGR | 22d  | 28 |
| FBgn0026210 | 674.8   | 58 | 1 | APSSLLDALEQHLATLEGR | 32d  | 28 |
| FBgn0026210 | 1011.72 | 88 | 2 | APSSLLDALEQHLATLEGR | 42d  | 28 |
| FBgn0026210 | 674.85  | 56 | 1 | APSSLLDALEQHLATLEGR | 46d  | 28 |
| FBgn0026210 | 893.06  | 45 | 1 | VAENVGIDKGDIPDLTK   | 50d  | 28 |
| FBgn0026210 | 1011.28 | 70 | 2 | APSSLLDALEQHLATLEGR | 56d  | 28 |
| FBgn0026369 | 399.06  | 35 | 3 | FSEQASK             | 22d  | 18 |
| FBgn0026369 | 399.33  | 35 | 2 | FSEQASK             | 62d  | 18 |
| FBgn0026369 | 399.25  | 35 | 3 | FSEQASK             | 22d  | 28 |
| FBgn0026369 | 399.09  | 35 | 5 | FSEQASK             | 32d  | 28 |
| FBgn0026369 | 399.17  | 35 | 7 | FSEQASK             | 36d  | 28 |
| FBgn0026369 | 399.31  | 35 | 5 | FSEQASK             | 42d  | 28 |
| FBgn0026369 | 399.05  | 35 | 9 | FSEQASK             | 46d  | 28 |
| FBgn0026369 | 399.08  | 35 | 1 | FSEQASK             | 50d  | 28 |
| FBgn0026369 | 399.3   | 35 | 2 | FSEQASK             | 52d  | 28 |
| FBgn0026401 | 709.53  | 36 | 1 | NSILGDILTSIDR       | 122d | 18 |
| FBgn0026409 | 697.75  | 52 | 2 | IQTIPGYANNFR        | 22d  | 18 |
| FBgn0026409 | 762.46  | 73 | 2 | SLGFSGMWNGLTTPR     | 22d  | 18 |
| FBgn0026409 | 762.41  | 68 | 2 | SLGFSGMWNGLTTPR     | 42d  | 18 |
| FBgn0026409 | 936.16  | 42 | 1 | VALGIPRPPPEMPASLK   | 42d  | 18 |
| FBgn0026409 | 697.99  | 46 | 1 | IQTIPGYANNFR        | 102d | 18 |
| FBgn0026409 | 762.51  | 83 | 1 | SLGFSGMWNGLTTPR     | 102d | 18 |
| FBgn0026409 | 698.08  | 41 | 1 | IQTIPGYANNFR        | 122d | 18 |
| FBgn0026409 | 762.25  | 71 | 1 | SLGFSGMWNGLTTPR     | 122d | 18 |
| FBgn0026409 | 697.6   | 37 | 1 | IQTIPGYANNFR        | 132d | 18 |
| FBgn0026409 | 698.02  | 48 | 1 | IQTIPGYANNFR        | 142d | 18 |
| FBgn0026409 | 762.36  | 49 | 1 | SLGFSGMWNGLTTPR     | 142d | 18 |
| FBgn0026409 | 697.73  | 46 | 2 | IQTIPGYANNFR        | 12d  | 28 |
| FBgn0026409 | 762.35  | 72 | 3 | SLGFSGMWNGLTTPR     | 12d  | 28 |

|             |         |    |   |                         |      |    |
|-------------|---------|----|---|-------------------------|------|----|
| FBgn0026409 | 936.2   | 45 | 1 | VALGIPRPPPEMPASLK       | 12d  | 28 |
| FBgn0026409 | 697.54  | 34 | 1 | IQTIPGYANNFR            | 22d  | 28 |
| FBgn0026409 | 762.42  | 57 | 1 | SLGFSGMWNGLTPR          | 22d  | 28 |
| FBgn0026409 | 935.84  | 39 | 1 | VALGIPRPPPEMPASLK       | 22d  | 28 |
| FBgn0026409 | 697.88  | 48 | 2 | IQTIPGYANNFR            | 32d  | 28 |
| FBgn0026409 | 762.4   | 51 | 2 | SLGFSGMWNGLTPR          | 32d  | 28 |
| FBgn0026409 | 762.56  | 59 | 1 | SLGFSGMWNGLTPR          | 36d  | 28 |
| FBgn0026409 | 697.69  | 54 | 3 | IQTIPGYANNFR            | 42d  | 28 |
| FBgn0026409 | 762.53  | 59 | 1 | SLGFSGMWNGLTPR          | 42d  | 28 |
| FBgn0026409 | 697.76  | 41 | 1 | IQTIPGYANNFR            | 46d  | 28 |
| FBgn0026409 | 715.11  | 70 | 3 | MLKEEGVNAFYK            | 46d  | 28 |
| FBgn0026409 | 762.35  | 70 | 3 | SLGFSGMWNGLTPR          | 46d  | 28 |
| FBgn0026409 | 697.86  | 34 | 1 | IQTIPGYANNFR            | 50d  | 28 |
| FBgn0026409 | 762.41  | 55 | 2 | SLGFSGMWNGLTPR          | 50d  | 28 |
| FBgn0026409 | 697.69  | 52 | 1 | IQTIPGYANNFR            | 52d  | 28 |
| FBgn0026409 | 762.02  | 40 | 1 | SLGFSGMWNGLTPR          | 56d  | 28 |
| FBgn0026415 | 996.68  | 73 | 3 | NNEVADFPAPIYELNER       | 2d   | 18 |
| FBgn0026415 | 1198.91 | 54 | 2 | SADDSGENGVWVGIEDPDATAIK | 2d   | 18 |
| FBgn0026415 | 872.94  | 80 | 1 | TYGFDGLDLGWQFPK         | 2d   | 18 |
| FBgn0026415 | 950.87  | 57 | 2 | VLLSVGGDKDTVDPENNK      | 2d   | 18 |
| FBgn0026415 | 996.43  | 45 | 1 | NNEVADFPAPIYELNER       | 42d  | 18 |
| FBgn0026415 | 1198.8  | 50 | 1 | SADDSGENGVWVGIEDPDATAIK | 42d  | 18 |
| FBgn0026415 | 873.12  | 49 | 1 | TYGFDGLDLGWQFPK         | 42d  | 18 |
| FBgn0026415 | 1199.15 | 86 | 2 | SADDSGENGVWVGIEDPDATAIK | 102d | 18 |
| FBgn0026415 | 996.48  | 64 | 2 | NNEVADFPAPIYELNER       | 112d | 18 |
| FBgn0026415 | 872.42  | 93 | 2 | TYGFDGLDLGWQFPK         | 112d | 18 |
| FBgn0026415 | 996.42  | 39 | 1 | NNEVADFPAPIYELNER       | 122d | 18 |
| FBgn0026415 | 1199.27 | 63 | 2 | SADDSGENGVWVGIEDPDATAIK | 122d | 18 |
| FBgn0026415 | 872.9   | 64 | 1 | TYGFDGLDLGWQFPK         | 122d | 18 |
| FBgn0026415 | 1199.27 | 42 | 1 | SADDSGENGVWVGIEDPDATAIK | 132d | 18 |
| FBgn0026415 | 873.1   | 56 | 2 | TYGFDGLDLGWQFPK         | 142d | 18 |
| FBgn0026415 | 996.47  | 62 | 2 | NNEVADFPAPIYELNER       | 2d   | 28 |

|             |         |    |   |                          |      |    |
|-------------|---------|----|---|--------------------------|------|----|
| FBgn0026415 | 676.57  | 56 | 2 | NPEFNVNYQVK              | 2d   | 28 |
| FBgn0026415 | 1198.98 | 62 | 1 | SADDSGENGVWVGIEDPDPTAAIK | 2d   | 28 |
| FBgn0026415 | 950.89  | 42 | 2 | VLLSVGGDKDTPDPENNK       | 2d   | 28 |
| FBgn0026415 | 996.54  | 39 | 1 | NNEVADFPAPIYELNER        | 12d  | 28 |
| FBgn0026415 | 676.86  | 43 | 1 | NPEFNVNYQVK              | 12d  | 28 |
| FBgn0026415 | 872.89  | 94 | 3 | TYGFDGLDLGWQFPK          | 22d  | 28 |
| FBgn0026415 | 996.22  | 73 | 1 | NNEVADFPAPIYELNER        | 32d  | 28 |
| FBgn0026415 | 873.11  | 45 | 1 | TYGFDGLDLGWQFPK          | 32d  | 28 |
| FBgn0026415 | 996.63  | 73 | 3 | NNEVADFPAPIYELNER        | 36d  | 28 |
| FBgn0026415 | 676.66  | 40 | 1 | NPEFNVNYQVK              | 36d  | 28 |
| FBgn0026415 | 996.47  | 51 | 1 | NNEVADFPAPIYELNER        | 42d  | 28 |
| FBgn0026415 | 676.67  | 59 | 3 | NPEFNVNYQVK              | 42d  | 28 |
| FBgn0026415 | 873     | 36 | 1 | TYGFDGLDLGWQFPK          | 42d  | 28 |
| FBgn0026415 | 996.62  | 69 | 2 | NNEVADFPAPIYELNER        | 46d  | 28 |
| FBgn0026415 | 676.85  | 41 | 1 | NPEFNVNYQVK              | 46d  | 28 |
| FBgn0026415 | 872.83  | 88 | 2 | TYGFDGLDLGWQFPK          | 46d  | 28 |
| FBgn0026415 | 677.05  | 48 | 2 | NPEFNVNYQVK              | 50d  | 28 |
| FBgn0026415 | 873.07  | 53 | 2 | TYGFDGLDLGWQFPK          | 50d  | 28 |
| FBgn0026415 | 950.82  | 34 | 1 | VLLSVGGDKDTPDPENNK       | 50d  | 28 |
| FBgn0026415 | 996.7   | 52 | 2 | NNEVADFPAPIYELNER        | 52d  | 28 |
| FBgn0026415 | 676.74  | 37 | 1 | NPEFNVNYQVK              | 52d  | 28 |
| FBgn0026415 | 618.97  | 39 | 2 | LDLDLGSSLFR              | 56d  | 28 |
| FBgn0026415 | 996.47  | 76 | 2 | NNEVADFPAPIYELNER        | 56d  | 28 |
| FBgn0026415 | 1199.23 | 52 | 1 | SADDSGENGVWVGIEDPDPTAAIK | 56d  | 28 |
| FBgn0026415 | 872.86  | 86 | 2 | TYGFDGLDLGWQFPK          | 56d  | 28 |
| FBgn0026418 | 1299.71 | 39 | 1 | IVSQLNDLENWLYEDGEDCER    | 112d | 18 |
| FBgn0026418 | 1295.23 | 49 | 1 | QLIEQVFNKPASTTLNQDEAVSR  | 22d  | 28 |
| FBgn0026418 | 821.33  | 54 | 2 | ASDYEQGPAAFDELK          | 42d  | 28 |
| FBgn0026439 | 632.36  | 63 | 1 | IVETQTESIDK              | 2d   | 18 |
| FBgn0026439 | 687.47  | 55 | 1 | VLTPDTLMDLVR             | 2d   | 18 |
| FBgn0026439 | 687.54  | 66 | 2 | VLTPDTLMDLVR             | 42d  | 18 |
| FBgn0026439 | 687.25  | 42 | 1 | VLTPDTLMDLVR             | 102d | 18 |

|             |        |    |   |                  |      |    |
|-------------|--------|----|---|------------------|------|----|
| FBgn0026439 | 687.53 | 43 | 1 | VLTPDTLMDLVR     | 132d | 18 |
| FBgn0026439 | 632.13 | 69 | 4 | IVETQTESIDK      | 2d   | 28 |
| FBgn0026439 | 687.5  | 59 | 2 | VLTPDTLMDLVR     | 2d   | 28 |
| FBgn0026573 | 489.04 | 41 | 1 | MKVMVKLK         | 50d  | 28 |
| FBgn0026597 | 588.24 | 35 | 1 | IKQIIGAIYR       | 62d  | 18 |
| FBgn0026708 | 547.68 | 39 | 2 | ALGLPIERPK       | 2d   | 18 |
| FBgn0026708 | 845.63 | 39 | 1 | ALVTETSVLDADEGIR | 2d   | 18 |
| FBgn0026708 | 772.35 | 55 | 3 | HLPEDETFQLVSK    | 2d   | 18 |
| FBgn0026708 | 830.07 | 61 | 2 | MLGYDNAPFTELMR   | 2d   | 18 |
| FBgn0026708 | 720.76 | 70 | 2 | SGQVVPGYGHAVLR   | 2d   | 18 |
| FBgn0026708 | 785.49 | 82 | 2 | SIDSSLDWSANFVK   | 2d   | 18 |
| FBgn0026708 | 577.83 | 42 | 2 | VVPPILTETGK      | 2d   | 18 |
| FBgn0026708 | 547.9  | 36 | 3 | ALGLPIERPK       | 22d  | 18 |
| FBgn0026708 | 845.44 | 76 | 2 | ALVTETSVLDADEGIR | 22d  | 18 |
| FBgn0026708 | 772.22 | 47 | 3 | HLPEDETFQLVSK    | 22d  | 18 |
| FBgn0026708 | 829.71 | 59 | 3 | MLGYDNAPFTELMR   | 22d  | 18 |
| FBgn0026708 | 505.75 | 39 | 1 | SFSTDLLVK        | 22d  | 18 |
| FBgn0026708 | 480.91 | 52 | 3 | SGQVVPGYGHAVLR   | 22d  | 18 |
| FBgn0026708 | 547.74 | 37 | 1 | ALGLPIERPK       | 42d  | 18 |
| FBgn0026708 | 650.83 | 86 | 3 | ALGVLASLVWDR     | 42d  | 18 |
| FBgn0026708 | 845.43 | 58 | 2 | ALVTETSVLDADEGIR | 42d  | 18 |
| FBgn0026708 | 658.94 | 54 | 2 | EAGNNPSEEQLK     | 42d  | 18 |
| FBgn0026708 | 772.39 | 57 | 1 | HLPEDETFQLVSK    | 42d  | 18 |
| FBgn0026708 | 830.1  | 69 | 5 | MLGYDNAPFTELMR   | 42d  | 18 |
| FBgn0026708 | 505.81 | 35 | 1 | SFSTDLLVK        | 42d  | 18 |
| FBgn0026708 | 481.08 | 41 | 1 | SGQVVPGYGHAVLR   | 42d  | 18 |
| FBgn0026708 | 785.24 | 84 | 5 | SIDSSLDWSANFVK   | 42d  | 18 |
| FBgn0026708 | 578.07 | 34 | 1 | VVPPILTETGK      | 42d  | 18 |
| FBgn0026708 | 547.72 | 39 | 2 | ALGLPIERPK       | 62d  | 18 |
| FBgn0026708 | 650.86 | 87 | 1 | ALGVLASLVWDR     | 62d  | 18 |
| FBgn0026708 | 845.66 | 77 | 3 | ALVTETSVLDADEGIR | 62d  | 18 |
| FBgn0026708 | 772.5  | 65 | 1 | HLPEDETFQLVSK    | 62d  | 18 |



|             |        |    |   |                  |      |    |
|-------------|--------|----|---|------------------|------|----|
| FBgn0026708 | 505.9  | 40 | 2 | SFSTDLLVK        | 62d  | 18 |
| FBgn0026708 | 720.83 | 54 | 2 | SGQVVPGYGHAVLR   | 62d  | 18 |
| FBgn0026708 | 577.98 | 35 | 1 | VVPPILTETGK      | 62d  | 18 |
| FBgn0026708 | 547.76 | 43 | 1 | ALGLPIERPK       | 82d  | 18 |
| FBgn0026708 | 845.24 | 52 | 2 | ALVTETSVLDADEGIR | 82d  | 18 |
| FBgn0026708 | 658.95 | 50 | 2 | EAGNNPSEEQLK     | 82d  | 18 |
| FBgn0026708 | 772.39 | 61 | 2 | HLPEDETFQLVSK    | 82d  | 18 |
| FBgn0026708 | 480.43 | 69 | 2 | SGQVVPGYGHAVLR   | 82d  | 18 |
| FBgn0026708 | 785.4  | 82 | 2 | SIDSSLDWSANFVK   | 82d  | 18 |
| FBgn0026708 | 577.95 | 35 | 1 | VVPPILTETGK      | 82d  | 18 |
| FBgn0026708 | 650.63 | 65 | 1 | ALGVLASLVWDR     | 102d | 18 |
| FBgn0026708 | 845.51 | 56 | 2 | ALVTETSVLDADEGIR | 102d | 18 |
| FBgn0026708 | 658.67 | 47 | 1 | EAGNNPSEEQLK     | 102d | 18 |
| FBgn0026708 | 830.02 | 51 | 1 | MLGYDNAPFTELMR   | 102d | 18 |
| FBgn0026708 | 785.54 | 96 | 4 | SIDSSLDWSANFVK   | 102d | 18 |
| FBgn0026708 | 651.11 | 85 | 3 | ALGVLASLVWDR     | 112d | 18 |
| FBgn0026708 | 845.62 | 51 | 1 | ALVTETSVLDADEGIR | 112d | 18 |
| FBgn0026708 | 439.3  | 37 | 1 | AYSDBGVHK        | 112d | 18 |
| FBgn0026708 | 785.23 | 70 | 4 | SIDSSLDWSANFVK   | 112d | 18 |
| FBgn0026708 | 548.01 | 41 | 1 | ALGLPIERPK       | 122d | 18 |
| FBgn0026708 | 650.94 | 72 | 1 | ALGVLASLVWDR     | 122d | 18 |
| FBgn0026708 | 659.01 | 38 | 1 | EAGNNPSEEQLK     | 122d | 18 |
| FBgn0026708 | 797.29 | 60 | 1 | MGETTIDMMYGGM    | 122d | 18 |
| FBgn0026708 | 830.09 | 53 | 1 | MLGYDNAPFTELMR   | 122d | 18 |
| FBgn0026708 | 720.93 | 51 | 3 | SGQVVPGYGHAVLR   | 122d | 18 |
| FBgn0026708 | 784.31 | 49 | 1 | SIDSSLDWSANFVK   | 122d | 18 |
| FBgn0026708 | 772.07 | 48 | 1 | HLPEDETFQLVSK    | 132d | 18 |
| FBgn0026708 | 830.05 | 47 | 2 | MLGYDNAPFTELMR   | 132d | 18 |
| FBgn0026708 | 785.57 | 57 | 2 | SIDSSLDWSANFVK   | 132d | 18 |
| FBgn0026708 | 651.11 | 72 | 3 | ALGVLASLVWDR     | 142d | 18 |
| FBgn0026708 | 797.3  | 47 | 1 | MGETTIDMMYGGM    | 142d | 18 |
| FBgn0026708 | 829.93 | 69 | 2 | MLGYDNAPFTELMR   | 142d | 18 |

|             |        |    |   |                  |      |    |
|-------------|--------|----|---|------------------|------|----|
| FBgn0026708 | 721.03 | 51 | 2 | SGQVVPGYGHAVLR   | 142d | 18 |
| FBgn0026708 | 547.84 | 35 | 2 | ALGLPIERPK       | 2d   | 28 |
| FBgn0026708 | 651.02 | 43 | 1 | ALGVLASLVWDR     | 2d   | 28 |
| FBgn0026708 | 845.47 | 50 | 2 | ALVTETSVLDADEGIR | 2d   | 28 |
| FBgn0026708 | 658.73 | 52 | 3 | EAGNNPSEEQLK     | 2d   | 28 |
| FBgn0026708 | 772.02 | 62 | 3 | HLPEDETFQLVSK    | 2d   | 28 |
| FBgn0026708 | 830.04 | 37 | 1 | MLGYDNAPFTELMR   | 2d   | 28 |
| FBgn0026708 | 720.66 | 58 | 3 | SGQVVPGYGHAVLR   | 2d   | 28 |
| FBgn0026708 | 785.42 | 87 | 1 | SIDSSLDWSANFVK   | 2d   | 28 |
| FBgn0026708 | 443.71 | 39 | 2 | VPQEQR           | 2d   | 28 |
| FBgn0026708 | 577.74 | 44 | 1 | VVPPILTETGK      | 2d   | 28 |
| FBgn0026708 | 650.85 | 66 | 1 | ALGVLASLVWDR     | 12d  | 28 |
| FBgn0026708 | 772.52 | 50 | 3 | HLPEDETFQLVSK    | 12d  | 28 |
| FBgn0026708 | 829.58 | 39 | 1 | MLGYDNAPFTELMR   | 12d  | 28 |
| FBgn0026708 | 720.88 | 65 | 3 | SGQVVPGYGHAVLR   | 12d  | 28 |
| FBgn0026708 | 785.55 | 68 | 3 | SIDSSLDWSANFVK   | 12d  | 28 |
| FBgn0026708 | 577.86 | 35 | 1 | VVPPILTETGK      | 12d  | 28 |
| FBgn0026708 | 845.6  | 48 | 1 | ALVTETSVLDADEGIR | 22d  | 28 |
| FBgn0026708 | 772.14 | 59 | 2 | HLPEDETFQLVSK    | 22d  | 28 |
| FBgn0026708 | 829.93 | 49 | 1 | MLGYDNAPFTELMR   | 22d  | 28 |
| FBgn0026708 | 720.94 | 60 | 3 | SGQVVPGYGHAVLR   | 22d  | 28 |
| FBgn0026708 | 650.77 | 78 | 2 | ALGVLASLVWDR     | 32d  | 28 |
| FBgn0026708 | 845.64 | 51 | 2 | ALVTETSVLDADEGIR | 32d  | 28 |
| FBgn0026708 | 772.28 | 51 | 3 | HLPEDETFQLVSK    | 32d  | 28 |
| FBgn0026708 | 829.97 | 48 | 1 | MLGYDNAPFTELMR   | 32d  | 28 |
| FBgn0026708 | 720.88 | 63 | 3 | SGQVVPGYGHAVLR   | 32d  | 28 |
| FBgn0026708 | 785.32 | 83 | 2 | SIDSSLDWSANFVK   | 32d  | 28 |
| FBgn0026708 | 547.62 | 43 | 2 | ALGLPIERPK       | 36d  | 28 |
| FBgn0026708 | 650.91 | 64 | 1 | ALGVLASLVWDR     | 36d  | 28 |
| FBgn0026708 | 845.34 | 45 | 1 | ALVTETSVLDADEGIR | 36d  | 28 |
| FBgn0026708 | 772.28 | 65 | 2 | HLPEDETFQLVSK    | 36d  | 28 |
| FBgn0026708 | 829.88 | 36 | 1 | MLGYDNAPFTELMR   | 36d  | 28 |

|             |        |    |   |                  |     |    |
|-------------|--------|----|---|------------------|-----|----|
| FBgn0026708 | 721.04 | 55 | 2 | SGQVVPGYGHAVLR   | 36d | 28 |
| FBgn0026708 | 785.55 | 72 | 3 | SIDSSLDWSANFVK   | 36d | 28 |
| FBgn0026708 | 577.74 | 35 | 1 | VVPPILTETGK      | 36d | 28 |
| FBgn0026708 | 548.07 | 38 | 3 | ALGLPIERPK       | 42d | 28 |
| FBgn0026708 | 650.72 | 66 | 2 | ALGVLASLVWDR     | 42d | 28 |
| FBgn0026708 | 845.58 | 98 | 3 | ALVTETSVLDADEGIR | 42d | 28 |
| FBgn0026708 | 658.83 | 50 | 1 | EAGNNPSEEQLK     | 42d | 28 |
| FBgn0026708 | 772.47 | 51 | 2 | HLPEDETFQLVSK    | 42d | 28 |
| FBgn0026708 | 830.09 | 82 | 2 | MLGYDNAPFTELMR   | 42d | 28 |
| FBgn0026708 | 720.71 | 63 | 2 | SGQVVPGYGHAVLR   | 42d | 28 |
| FBgn0026708 | 785.28 | 77 | 5 | SIDSSLDWSANFVK   | 42d | 28 |
| FBgn0026708 | 473.63 | 52 | 2 | SQVQQLSR         | 42d | 28 |
| FBgn0026708 | 547.6  | 44 | 3 | ALGLPIERPK       | 46d | 28 |
| FBgn0026708 | 845.41 | 52 | 1 | ALVTETSVLDADEGIR | 46d | 28 |
| FBgn0026708 | 772.21 | 60 | 3 | HLPEDETFQLVSK    | 46d | 28 |
| FBgn0026708 | 797.48 | 62 | 2 | MGETTIDMMYGGMR   | 46d | 28 |
| FBgn0026708 | 829.65 | 48 | 1 | MLGYDNAPFTELMR   | 46d | 28 |
| FBgn0026708 | 720.67 | 62 | 3 | SGQVVPGYGHAVLR   | 46d | 28 |
| FBgn0026708 | 785.48 | 84 | 2 | SIDSSLDWSANFVK   | 46d | 28 |
| FBgn0026708 | 548.02 | 45 | 3 | ALGLPIERPK       | 50d | 28 |
| FBgn0026708 | 650.74 | 73 | 2 | ALGVLASLVWDR     | 50d | 28 |
| FBgn0026708 | 845.45 | 36 | 2 | ALVTETSVLDADEGIR | 50d | 28 |
| FBgn0026708 | 772.4  | 44 | 2 | HLPEDETFQLVSK    | 50d | 28 |
| FBgn0026708 | 830.06 | 71 | 1 | MLGYDNAPFTELMR   | 50d | 28 |
| FBgn0026708 | 720.84 | 49 | 3 | SGQVVPGYGHAVLR   | 50d | 28 |
| FBgn0026708 | 785.52 | 89 | 2 | SIDSSLDWSANFVK   | 50d | 28 |
| FBgn0026708 | 650.97 | 74 | 1 | ALGVLASLVWDR     | 52d | 28 |
| FBgn0026708 | 845.47 | 70 | 2 | ALVTETSVLDADEGIR | 52d | 28 |
| FBgn0026708 | 829.95 | 60 | 4 | MLGYDNAPFTELMR   | 52d | 28 |
| FBgn0026708 | 505.96 | 45 | 1 | SFSTDLLVK        | 52d | 28 |
| FBgn0026708 | 720.68 | 58 | 3 | SGQVVPGYGHAVLR   | 52d | 28 |
| FBgn0026708 | 785.3  | 70 | 2 | SIDSSLDWSANFVK   | 52d | 28 |

|             |         |    |   |                             |      |    |
|-------------|---------|----|---|-----------------------------|------|----|
| FBgn0026708 | 547.75  | 37 | 1 | ALGLPIERPK                  | 56d  | 28 |
| FBgn0026708 | 650.68  | 83 | 2 | ALGVLASLVWDR                | 56d  | 28 |
| FBgn0026708 | 845.5   | 41 | 1 | ALVTETSVLDADEGIR            | 56d  | 28 |
| FBgn0026708 | 658.73  | 70 | 1 | EAGNNPSEEQLK                | 56d  | 28 |
| FBgn0026708 | 829.92  | 66 | 3 | MLGYDNAPFTELMR              | 56d  | 28 |
| FBgn0026708 | 720.82  | 59 | 3 | SGQVVPGYGHAVLR              | 56d  | 28 |
| FBgn0026708 | 785.51  | 90 | 3 | SIDSSLDWSANFVK              | 56d  | 28 |
| FBgn0026729 | 471.16  | 36 | 1 | LNGGEWHK                    | 32d  | 28 |
| FBgn0026729 | 471.02  | 38 | 1 | LNGGEWHK                    | 46d  | 28 |
| FBgn0026761 | 758.08  | 55 | 1 | GVVDSEDIPLNLSR              | 102d | 18 |
| FBgn0026761 | 758.01  | 67 | 1 | GVVDSEDIPLNLSR              | 142d | 18 |
| FBgn0026761 | 757.78  | 71 | 1 | GVVDSEDIPLNLSR              | 12d  | 28 |
| FBgn0026777 | 1244.97 | 50 | 1 | IPSTLDNVDLFSPDLEVATSAQR     | 2d   | 18 |
| FBgn0027066 | 825.36  | 39 | 1 | FQDNFEFLQWFK                | 2d   | 18 |
| FBgn0027066 | 768.86  | 74 | 3 | TNLEHEYIQNFK                | 42d  | 28 |
| FBgn0027066 | 768.83  | 52 | 1 | TNLEHEYIQNFK                | 46d  | 28 |
| FBgn0027082 | 681.83  | 38 | 1 | SQKLLTELGFVK                | 32d  | 28 |
| FBgn0027082 | 681.68  | 52 | 3 | SQKLLTELGFVK                | 42d  | 28 |
| FBgn0027082 | 681.89  | 38 | 2 | SQKLLTELGFVK                | 46d  | 28 |
| FBgn0027082 | 681.7   | 36 | 2 | SQKLLTELGFVK                | 50d  | 28 |
| FBgn0027082 | 681.99  | 37 | 2 | SQKLLTELGFVK                | 52d  | 28 |
| FBgn0027092 | 1044.18 | 67 | 1 | DDGTFYEFGEDIPEAPER          | 2d   | 28 |
| FBgn0027092 | 1044.56 | 76 | 1 | DDGTFYEFGEDIPEAPER          | 12d  | 28 |
| FBgn0027094 | 1457.9  | 34 | 1 | SNYDSDLFVPLFDAIQAGTGAPPYQGR | 2d   | 18 |
| FBgn0027109 | 753.78  | 77 | 3 | FLQDLDTYYGDR                | 102d | 18 |
| FBgn0027109 | 753.75  | 72 | 1 | FLQDLDTYYGDR                | 122d | 18 |
| FBgn0027109 | 754.1   | 83 | 1 | FLQDLDTYYGDR                | 142d | 18 |
| FBgn0027291 | 1267.24 | 91 | 3 | ENTEGEYSGIEHEIVDGVVQSIK     | 2d   | 18 |
| FBgn0027291 | 788.57  | 62 | 1 | FGIPQAAIDSVNTNK             | 2d   | 18 |
| FBgn0027291 | 584.25  | 57 | 3 | FPEIQFEK                    | 2d   | 18 |
| FBgn0027291 | 1341.82 | 50 | 2 | IFTAANVPIEWEAVDVTVPVRGPDGK  | 2d   | 18 |
| FBgn0027291 | 705.45  | 36 | 1 | TLYDDVDVVTIR                | 2d   | 18 |

|             |         |     |   |                         |      |    |
|-------------|---------|-----|---|-------------------------|------|----|
| FBgn0027291 | 1267.03 | 57  | 1 | ENTEGEYSGIEHEIVDGVVQSIK | 22d  | 18 |
| FBgn0027291 | 788.28  | 68  | 1 | FGIPQAAIDSVNTNK         | 22d  | 18 |
| FBgn0027291 | 584.11  | 60  | 2 | FPEIQFEK                | 22d  | 18 |
| FBgn0027291 | 1114.76 | 82  | 2 | IFTAANVPIEWEAVDVTTPVR   | 22d  | 18 |
| FBgn0027291 | 933.7   | 46  | 3 | VTLIPGDGIGPEISAAVQK     | 22d  | 18 |
| FBgn0027291 | 1267.04 | 63  | 2 | ENTEGEYSGIEHEIVDGVVQSIK | 42d  | 18 |
| FBgn0027291 | 788.3   | 86  | 1 | FGIPQAAIDSVNTNK         | 42d  | 18 |
| FBgn0027291 | 584.4   | 53  | 3 | FPEIQFEK                | 42d  | 18 |
| FBgn0027291 | 541.01  | 36  | 1 | HMELNTYADKIER           | 42d  | 18 |
| FBgn0027291 | 1114.59 | 71  | 3 | IFTAANVPIEWEAVDVTTPVR   | 42d  | 18 |
| FBgn0027291 | 705.55  | 60  | 3 | TLYDDVDVVTIR            | 42d  | 18 |
| FBgn0027291 | 933.58  | 60  | 2 | VTLIPGDGIGPEISAAVQK     | 42d  | 18 |
| FBgn0027291 | 1267.15 | 95  | 2 | ENTEGEYSGIEHEIVDGVVQSIK | 62d  | 18 |
| FBgn0027291 | 788.56  | 60  | 1 | FGIPQAAIDSVNTNK         | 62d  | 18 |
| FBgn0027291 | 584.35  | 62  | 3 | FPEIQFEK                | 62d  | 18 |
| FBgn0027291 | 1114.43 | 72  | 3 | IFTAANVPIEWEAVDVTTPVR   | 62d  | 18 |
| FBgn0027291 | 705.59  | 58  | 1 | TLYDDVDVVTIR            | 62d  | 18 |
| FBgn0027291 | 933.15  | 52  | 2 | VTLIPGDGIGPEISAAVQK     | 62d  | 18 |
| FBgn0027291 | 1267.15 | 83  | 2 | ENTEGEYSGIEHEIVDGVVQSIK | 82d  | 18 |
| FBgn0027291 | 788.5   | 56  | 2 | FGIPQAAIDSVNTNK         | 82d  | 18 |
| FBgn0027291 | 584.26  | 62  | 2 | FPEIQFEK                | 82d  | 18 |
| FBgn0027291 | 1114.72 | 57  | 1 | IFTAANVPIEWEAVDVTTPVR   | 82d  | 18 |
| FBgn0027291 | 705.19  | 68  | 2 | TLYDDVDVVTIR            | 82d  | 18 |
| FBgn0027291 | 933.36  | 64  | 2 | VTLIPGDGIGPEISAAVQK     | 82d  | 18 |
| FBgn0027291 | 1267.09 | 107 | 1 | ENTEGEYSGIEHEIVDGVVQSIK | 102d | 18 |
| FBgn0027291 | 787.79  | 74  | 3 | FGIPQAAIDSVNTNK         | 102d | 18 |
| FBgn0027291 | 584.39  | 57  | 3 | FPEIQFEK                | 102d | 18 |
| FBgn0027291 | 1114.34 | 47  | 1 | IFTAANVPIEWEAVDVTTPVR   | 102d | 18 |
| FBgn0027291 | 1267.2  | 47  | 1 | ENTEGEYSGIEHEIVDGVVQSIK | 112d | 18 |
| FBgn0027291 | 787.99  | 50  | 3 | FGIPQAAIDSVNTNK         | 112d | 18 |
| FBgn0027291 | 583.77  | 64  | 3 | FPEIQFEK                | 112d | 18 |
| FBgn0027291 | 1114.55 | 50  | 2 | IFTAANVPIEWEAVDVTTPVR   | 112d | 18 |

|             |         |    |   |                            |      |    |
|-------------|---------|----|---|----------------------------|------|----|
| FBgn0027291 | 705.35  | 45 | 2 | TLYDDVDVVTIR               | 112d | 18 |
| FBgn0027291 | 933.48  | 44 | 1 | VTLIPGDGIGPEISAAVQK        | 112d | 18 |
| FBgn0027291 | 1267.26 | 77 | 3 | ENTEGEYSGIEHEIVDGVVQSIK    | 122d | 18 |
| FBgn0027291 | 788.08  | 61 | 3 | FGIPQAAIDSVNTNK            | 122d | 18 |
| FBgn0027291 | 584.08  | 63 | 3 | FPEIQFE EK                 | 122d | 18 |
| FBgn0027291 | 1114.78 | 54 | 1 | IFTAANVPIEWEAVDVT PVR      | 122d | 18 |
| FBgn0027291 | 1267.17 | 55 | 1 | ENTEGEYSGIEHEIVDGVVQSIK    | 132d | 18 |
| FBgn0027291 | 584.22  | 55 | 1 | FPEIQFE EK                 | 132d | 18 |
| FBgn0027291 | 705.6   | 43 | 1 | TLYDDVDVVTIR               | 132d | 18 |
| FBgn0027291 | 1267.2  | 68 | 2 | ENTEGEYSGIEHEIVDGVVQSIK    | 142d | 18 |
| FBgn0027291 | 788.4   | 72 | 3 | FGIPQAAIDSVNTNK            | 142d | 18 |
| FBgn0027291 | 584.49  | 62 | 2 | FPEIQFE EK                 | 142d | 18 |
| FBgn0027291 | 1114.68 | 67 | 2 | IFTAANVPIEWEAVDVT PVR      | 142d | 18 |
| FBgn0027291 | 705.57  | 44 | 1 | TLYDDVDVVTIR               | 142d | 18 |
| FBgn0027291 | 1267.27 | 67 | 1 | ENTEGEYSGIEHEIVDGVVQSIK    | 2d   | 28 |
| FBgn0027291 | 788.63  | 66 | 2 | FGIPQAAIDSVNTNK            | 2d   | 28 |
| FBgn0027291 | 584.03  | 45 | 1 | FPEIQFE EK                 | 2d   | 28 |
| FBgn0027291 | 1114.62 | 56 | 2 | IFTAANVPIEWEAVDVT PVR      | 2d   | 28 |
| FBgn0027291 | 705.58  | 60 | 2 | TLYDDVDVVTIR               | 2d   | 28 |
| FBgn0027291 | 933.31  | 44 | 1 | VTLIPGDGIGPEISAAVQK        | 2d   | 28 |
| FBgn0027291 | 476.58  | 37 | 1 | YLTGDLGGR                  | 2d   | 28 |
| FBgn0027291 | 699.44  | 43 | 1 | DAPAVTATPAVSQVNATPAASR     | 12d  | 28 |
| FBgn0027291 | 1267.2  | 79 | 5 | ENTEGEYSGIEHEIVDGVVQSIK    | 12d  | 28 |
| FBgn0027291 | 788.41  | 88 | 4 | FGIPQAAIDSVNTNK            | 12d  | 28 |
| FBgn0027291 | 584.03  | 62 | 2 | FPEIQFE EK                 | 12d  | 28 |
| FBgn0027291 | 1114.41 | 64 | 1 | IFTAANVPIEWEAVDVT PVR      | 12d  | 28 |
| FBgn0027291 | 1341.8  | 53 | 3 | IFTAANVPIEWEAVDVT PVRGPDGK | 12d  | 28 |
| FBgn0027291 | 705.51  | 37 | 1 | TLYDDVDVVTIR               | 12d  | 28 |
| FBgn0027291 | 1267.21 | 62 | 4 | ENTEGEYSGIEHEIVDGVVQSIK    | 22d  | 28 |
| FBgn0027291 | 788.34  | 68 | 2 | FGIPQAAIDSVNTNK            | 22d  | 28 |
| FBgn0027291 | 584.12  | 56 | 1 | FPEIQFE EK                 | 22d  | 28 |
| FBgn0027291 | 1114.79 | 65 | 2 | IFTAANVPIEWEAVDVT PVR      | 22d  | 28 |

|             |         |    |   |                           |     |    |
|-------------|---------|----|---|---------------------------|-----|----|
| FBgn0027291 | 894.86  | 45 | 1 | IFTAANVPIEWEAVDVTPVRGPDGK | 22d | 28 |
| FBgn0027291 | 933.58  | 50 | 1 | VTLIPGDGIGPEISAAVQK       | 22d | 28 |
| FBgn0027291 | 1267.31 | 66 | 1 | ENTEGEYSGIEHEIVDGVVQSIK   | 32d | 28 |
| FBgn0027291 | 788.5   | 67 | 3 | FGIPQAAIDSVNTNK           | 32d | 28 |
| FBgn0027291 | 584.36  | 60 | 3 | FPEIQFEK                  | 32d | 28 |
| FBgn0027291 | 1114.55 | 92 | 3 | IFTAANVPIEWEAVDVTPVR      | 32d | 28 |
| FBgn0027291 | 933.48  | 71 | 3 | VTLIPGDGIGPEISAAVQK       | 32d | 28 |
| FBgn0027291 | 1267.19 | 71 | 4 | ENTEGEYSGIEHEIVDGVVQSIK   | 36d | 28 |
| FBgn0027291 | 788.33  | 58 | 1 | FGIPQAAIDSVNTNK           | 36d | 28 |
| FBgn0027291 | 584.21  | 59 | 1 | FPEIQFEK                  | 36d | 28 |
| FBgn0027291 | 1114.63 | 86 | 2 | IFTAANVPIEWEAVDVTPVR      | 36d | 28 |
| FBgn0027291 | 705.36  | 69 | 1 | TLYDDVDVVTIR              | 36d | 28 |
| FBgn0027291 | 933.47  | 39 | 1 | VTLIPGDGIGPEISAAVQK       | 36d | 28 |
| FBgn0027291 | 1267.09 | 72 | 6 | ENTEGEYSGIEHEIVDGVVQSIK   | 42d | 28 |
| FBgn0027291 | 788.52  | 63 | 2 | FGIPQAAIDSVNTNK           | 42d | 28 |
| FBgn0027291 | 584.27  | 55 | 3 | FPEIQFEK                  | 42d | 28 |
| FBgn0027291 | 1114.49 | 76 | 3 | IFTAANVPIEWEAVDVTPVR      | 42d | 28 |
| FBgn0027291 | 933.69  | 54 | 3 | VTLIPGDGIGPEISAAVQK       | 42d | 28 |
| FBgn0027291 | 1267.17 | 58 | 3 | ENTEGEYSGIEHEIVDGVVQSIK   | 46d | 28 |
| FBgn0027291 | 788.41  | 56 | 2 | FGIPQAAIDSVNTNK           | 46d | 28 |
| FBgn0027291 | 584.05  | 62 | 2 | FPEIQFEK                  | 46d | 28 |
| FBgn0027291 | 1114.54 | 66 | 1 | IFTAANVPIEWEAVDVTPVR      | 46d | 28 |
| FBgn0027291 | 705.36  | 66 | 2 | TLYDDVDVVTIR              | 46d | 28 |
| FBgn0027291 | 1267.26 | 94 | 1 | ENTEGEYSGIEHEIVDGVVQSIK   | 50d | 28 |
| FBgn0027291 | 788.36  | 59 | 4 | FGIPQAAIDSVNTNK           | 50d | 28 |
| FBgn0027291 | 584.52  | 62 | 2 | FPEIQFEK                  | 50d | 28 |
| FBgn0027291 | 1114.66 | 85 | 3 | IFTAANVPIEWEAVDVTPVR      | 50d | 28 |
| FBgn0027291 | 1267.25 | 75 | 4 | ENTEGEYSGIEHEIVDGVVQSIK   | 52d | 28 |
| FBgn0027291 | 788.64  | 78 | 3 | FGIPQAAIDSVNTNK           | 52d | 28 |
| FBgn0027291 | 584.02  | 57 | 3 | FPEIQFEK                  | 52d | 28 |
| FBgn0027291 | 1114.58 | 45 | 1 | IFTAANVPIEWEAVDVTPVR      | 52d | 28 |
| FBgn0027291 | 933.61  | 62 | 2 | VTLIPGDGIGPEISAAVQK       | 52d | 28 |

|             |         |     |   |                              |      |    |
|-------------|---------|-----|---|------------------------------|------|----|
| FBgn0027291 | 476.84  | 43  | 2 | YLTGDLGGR                    | 52d  | 28 |
| FBgn0027291 | 1267.03 | 107 | 2 | ENTEGEYSGIEHEIVDGVVQSIK      | 56d  | 28 |
| FBgn0027291 | 584.32  | 52  | 2 | FPEIQFEEK                    | 56d  | 28 |
| FBgn0027291 | 1114.78 | 58  | 2 | IFTAANVPIEWEAVDVTTPVR        | 56d  | 28 |
| FBgn0027291 | 705.05  | 51  | 4 | TLYDDVDVVTIR                 | 56d  | 28 |
| FBgn0027291 | 933.5   | 50  | 1 | VTLIPGDGIGPEISAAVQK          | 56d  | 28 |
| FBgn0027335 | 389.41  | 36  | 1 | ELEEEK                       | 22d  | 28 |
| FBgn0027356 | 911.15  | 41  | 1 | TADEIFDDHLNMFNR              | 2d   | 18 |
| FBgn0027356 | 911.36  | 54  | 1 | TADEIFDDHLNMFNR              | 22d  | 18 |
| FBgn0027356 | 911.43  | 57  | 2 | TADEIFDDHLNMFNR              | 62d  | 18 |
| FBgn0027356 | 911.35  | 67  | 3 | TADEIFDDHLNMFNR              | 2d   | 28 |
| FBgn0027356 | 787.16  | 59  | 1 | SLERPELSGLNASAK              | 12d  | 28 |
| FBgn0027493 | 784.44  | 43  | 1 | VGELLGDFNLFSEK               | 122d | 18 |
| FBgn0027495 | 400.94  | 38  | 1 | LIGIISGK                     | 42d  | 28 |
| FBgn0027515 | 676.28  | 42  | 1 | NIYNKIIEMSK                  | 56d  | 28 |
| FBgn0027552 | 679.23  | 69  | 2 | YLIEIGTIPLPK                 | 22d  | 18 |
| FBgn0027552 | 679.31  | 48  | 1 | YLIEIGTIPLPK                 | 42d  | 18 |
| FBgn0027552 | 920.08  | 74  | 1 | GEVELNDIDYLDTW               | 102d | 18 |
| FBgn0027552 | 919.97  | 50  | 1 | GEVELNDIDYLDTW               | 12d  | 28 |
| FBgn0027552 | 776.84  | 53  | 1 | SIGVSNFNSEQLTR               | 12d  | 28 |
| FBgn0027552 | 776.77  | 56  | 1 | SIGVSNFNSEQLTR               | 36d  | 28 |
| FBgn0027552 | 919.8   | 55  | 3 | GEVELNDIDYLDTW               | 56d  | 28 |
| FBgn0027552 | 679.55  | 62  | 1 | YLIEIGTIPLPK                 | 56d  | 28 |
| FBgn0027554 | 953.27  | 50  | 1 | DPETTSVSNSTGGVEEAK           | 56d  | 28 |
| FBgn0027560 | 1105.24 | 44  | 1 | DPNEAIPESNPNDQTPTAGLK        | 2d   | 18 |
| FBgn0027560 | 1104.96 | 70  | 3 | DPNEAIPESNPNDQTPTAGLK        | 22d  | 18 |
| FBgn0027560 | 1105.04 | 49  | 2 | DPNEAIPESNPNDQTPTAGLK        | 42d  | 18 |
| FBgn0027560 | 986.99  | 47  | 1 | LALLLDYDGTLAPIAPHPDLATLSPEIK | 42d  | 18 |
| FBgn0027560 | 1105.02 | 48  | 1 | DPNEAIPESNPNDQTPTAGLK        | 62d  | 18 |
| FBgn0027560 | 1479.9  | 37  | 1 | LALLLDYDGTLAPIAPHPDLATLSPEIK | 62d  | 18 |
| FBgn0027560 | 1105.08 | 48  | 1 | DPNEAIPESNPNDQTPTAGLK        | 82d  | 18 |
| FBgn0027560 | 1105.2  | 57  | 1 | DPNEAIPESNPNDQTPTAGLK        | 102d | 18 |



|             |         |    |   |                                 |      |    |
|-------------|---------|----|---|---------------------------------|------|----|
| FBgn0027560 | 1105.14 | 44 | 2 | DPNEAIPESNPNDQTPTAGLK           | 112d | 18 |
| FBgn0027560 | 1105.11 | 40 | 1 | DPNEAIPESNPNDQTPTAGLK           | 142d | 18 |
| FBgn0027560 | 737.09  | 36 | 1 | DPNEAIPESNPNDQTPTAGLK           | 2d   | 28 |
| FBgn0027560 | 1105.24 | 65 | 2 | DPNEAIPESNPNDQTPTAGLK           | 12d  | 28 |
| FBgn0027560 | 836.97  | 46 | 1 | PDTEIIVTNAGEPSTK                | 12d  | 28 |
| FBgn0027560 | 1104.92 | 58 | 3 | DPNEAIPESNPNDQTPTAGLK           | 36d  | 28 |
| FBgn0027560 | 987.04  | 42 | 1 | LALLLDYDGTAPIAPHDLATLSPEIK      | 36d  | 28 |
| FBgn0027560 | 1105.09 | 52 | 3 | DPNEAIPESNPNDQTPTAGLK           | 42d  | 28 |
| FBgn0027560 | 1105.12 | 51 | 3 | DPNEAIPESNPNDQTPTAGLK           | 50d  | 28 |
| FBgn0027560 | 1105.15 | 48 | 1 | DPNEAIPESNPNDQTPTAGLK           | 52d  | 28 |
| FBgn0027560 | 1104.92 | 62 | 2 | DPNEAIPESNPNDQTPTAGLK           | 56d  | 28 |
| FBgn0027567 | 1395.18 | 94 | 2 | LNEDDDEYDDDGDAAVEEGDATNDK       | 2d   | 18 |
| FBgn0027567 | 1394.84 | 92 | 2 | LNEDDDEYDDDGDAAVEEGDATNDK       | 82d  | 18 |
| FBgn0027571 | 776.4   | 64 | 2 | AAPQLDLGGGGHYVPR                | 2d   | 18 |
| FBgn0027571 | 1296.99 | 88 | 3 | ETYEEIGLNPADVYVEAHGTGTK         | 2d   | 18 |
| FBgn0027571 | 731.59  | 49 | 1 | FAEEVITAEPQR                    | 2d   | 18 |
| FBgn0027571 | 544.99  | 42 | 1 | FSLTSTLYR                       | 2d   | 18 |
| FBgn0027571 | 1312.67 | 74 | 2 | ITIPESIDNEELPLEEQTPSAVAK        | 2d   | 18 |
| FBgn0027571 | 738.61  | 72 | 3 | KLELADGYQPTLK                   | 2d   | 18 |
| FBgn0027571 | 1128.76 | 97 | 3 | LETQQATLQVEHAYVNALVK            | 2d   | 18 |
| FBgn0027571 | 1270.02 | 59 | 3 | LEVPAYGLQYTEAVPSDSLESAK         | 2d   | 18 |
| FBgn0027571 | 1348.41 | 70 | 1 | RLEVPAYGLQYTEAVPSDSLESAK        | 2d   | 18 |
| FBgn0027571 | 1762.47 | 38 | 1 | TFEAVEQLLESASTNADDDEYLQLINEIHSK | 2d   | 18 |
| FBgn0027571 | 1202.69 | 63 | 1 | TGAVVPLPTSVFNDQQVEQAFR          | 2d   | 18 |
| FBgn0027571 | 776.39  | 48 | 2 | AAPQLDLGGGGHYVPR                | 22d  | 18 |
| FBgn0027571 | 1174.48 | 44 | 1 | EEQVETGLPVQWYSDINVIK            | 22d  | 18 |
| FBgn0027571 | 1296.98 | 94 | 1 | ETYEEIGLNPADVYVEAHGTGTK         | 22d  | 18 |
| FBgn0027571 | 1312.61 | 70 | 4 | ITIPESIDNEELPLEEQTPSAVAK        | 22d  | 18 |
| FBgn0027571 | 738.8   | 70 | 2 | KLELADGYQPTLK                   | 22d  | 18 |
| FBgn0027571 | 1128.59 | 55 | 2 | LETQQATLQVEHAYVNALVK            | 22d  | 18 |
| FBgn0027571 | 1269.97 | 45 | 3 | LEVPAYGLQYTEAVPSDSLESAK         | 22d  | 18 |
| FBgn0027571 | 1202.46 | 64 | 3 | TGAVVPLPTSVFNDQQVEQAFR          | 22d  | 18 |

|             |         |     |   |                          |     |    |
|-------------|---------|-----|---|--------------------------|-----|----|
| FBgn0027571 | 1063.81 | 47  | 1 | YQFVPNINTTDLNENSEK       | 22d | 18 |
| FBgn0027571 | 776.5   | 47  | 2 | AAPQLDLGGGGHYVPR         | 42d | 18 |
| FBgn0027571 | 1027.86 | 42  | 1 | DSDLENFDQQFFGVHQQ        | 42d | 18 |
| FBgn0027571 | 604.79  | 60  | 1 | DTSFEQLVLR               | 42d | 18 |
| FBgn0027571 | 1174.25 | 53  | 3 | EEQVETGLPVQWYSINVIK      | 42d | 18 |
| FBgn0027571 | 935.06  | 59  | 2 | ENGFLILEETLPTYTK         | 42d | 18 |
| FBgn0027571 | 1296.95 | 102 | 1 | ETYEEIGLNPADVYVEAHGTGTK  | 42d | 18 |
| FBgn0027571 | 1312.6  | 65  | 3 | ITIPESIDNEELPLEEQTPSAVAK | 42d | 18 |
| FBgn0027571 | 1128.58 | 78  | 1 | LETQQATLQVEHAYVNALVK     | 42d | 18 |
| FBgn0027571 | 693.31  | 40  | 1 | LHALDVAIQVIIENSSGAVK     | 42d | 18 |
| FBgn0027571 | 671.2   | 54  | 2 | LLIVIPTWEEK              | 42d | 18 |
| FBgn0027571 | 788.48  | 68  | 4 | QSPIFFISPIEGFASALEPLAK   | 42d | 18 |
| FBgn0027571 | 1202.5  | 68  | 2 | TGAVVPLPTSVFNDQQVEQAFR   | 42d | 18 |
| FBgn0027571 | 552.71  | 50  | 1 | TLENSIASIR               | 42d | 18 |
| FBgn0027571 | 744.84  | 54  | 1 | TNVTLVKPTDNSAK           | 42d | 18 |
| FBgn0027571 | 1144.15 | 46  | 1 | VDNALVAGAGLILKPTMSLQFK   | 42d | 18 |
| FBgn0027571 | 776.29  | 62  | 3 | AAPQLDLGGGGHYVPR         | 62d | 18 |
| FBgn0027571 | 934.64  | 56  | 1 | ENGFLILEETLPTYTK         | 62d | 18 |
| FBgn0027571 | 1297.08 | 100 | 1 | ETYEEIGLNPADVYVEAHGTGTK  | 62d | 18 |
| FBgn0027571 | 731.35  | 48  | 1 | FAEEVITAEPQR             | 62d | 18 |
| FBgn0027571 | 1312.5  | 67  | 3 | ITIPESIDNEELPLEEQTPSAVAK | 62d | 18 |
| FBgn0027571 | 738.99  | 67  | 1 | KLELADGYQPTLK            | 62d | 18 |
| FBgn0027571 | 1128.55 | 55  | 1 | LETQQATLQVEHAYVNALVK     | 62d | 18 |
| FBgn0027571 | 1270.3  | 61  | 2 | LEVPAYGLQYTEAVPSDSLESAK  | 62d | 18 |
| FBgn0027571 | 640.81  | 65  | 1 | LPESSTIEEFK              | 62d | 18 |
| FBgn0027571 | 1181.75 | 63  | 1 | QSPIFFISPIEGFASALEPLAK   | 62d | 18 |
| FBgn0027571 | 1347.96 | 50  | 2 | RLEVPAYGLQYTEAVPSDSLESAK | 62d | 18 |
| FBgn0027571 | 1202.55 | 64  | 2 | TGAVVPLPTSVFNDQQVEQAFR   | 62d | 18 |
| FBgn0027571 | 552.74  | 43  | 1 | TLENSIASIR               | 62d | 18 |
| FBgn0027571 | 776.58  | 63  | 2 | AAPQLDLGGGGHYVPR         | 82d | 18 |
| FBgn0027571 | 1297.31 | 88  | 2 | ETYEEIGLNPADVYVEAHGTGTK  | 82d | 18 |
| FBgn0027571 | 731.57  | 35  | 1 | FAEEVITAEPQR             | 82d | 18 |

|             |         |     |   |                                 |      |    |
|-------------|---------|-----|---|---------------------------------|------|----|
| FBgn0027571 | 1312.78 | 81  | 3 | ITIPESIDNEELPLEEQTPSAVAK        | 82d  | 18 |
| FBgn0027571 | 739.14  | 71  | 3 | KLELADGYQPTLK                   | 82d  | 18 |
| FBgn0027571 | 675.05  | 59  | 1 | LELADGYQPTLK                    | 82d  | 18 |
| FBgn0027571 | 1270.24 | 65  | 1 | LEVPAYGLQYTEAVPSDSLESAAK        | 82d  | 18 |
| FBgn0027571 | 640.85  | 76  | 1 | LPESTIEEFK                      | 82d  | 18 |
| FBgn0027571 | 1174.52 | 57  | 2 | EEQVETGLPVQWYSINVIK             | 102d | 18 |
| FBgn0027571 | 1297.03 | 138 | 4 | ETYEEIGLNPADVYVEAHGTGTK         | 102d | 18 |
| FBgn0027571 | 1128.72 | 58  | 1 | LETQQATLQVEHAYVNALVK            | 102d | 18 |
| FBgn0027571 | 1181.41 | 49  | 3 | QSPIFFISPIEGFASALEPLAK          | 102d | 18 |
| FBgn0027571 | 1348.18 | 40  | 1 | RLEVPAYGLQYTEAVPSDSLESAAK       | 102d | 18 |
| FBgn0027571 | 1175.23 | 46  | 1 | TFEAVEQLLESASTNADDDEYLQLINEIHSK | 102d | 18 |
| FBgn0027571 | 1202.77 | 65  | 3 | TGAVVPLPTSVFNDQQVEQAFR          | 102d | 18 |
| FBgn0027571 | 776.48  | 58  | 2 | AAPQLDLGGGHYVPR                 | 112d | 18 |
| FBgn0027571 | 1174.81 | 50  | 1 | EEQVETGLPVQWYSINVIK             | 112d | 18 |
| FBgn0027571 | 1297.14 | 113 | 4 | ETYEEIGLNPADVYVEAHGTGTK         | 112d | 18 |
| FBgn0027571 | 1312.81 | 64  | 1 | ITIPESIDNEELPLEEQTPSAVAK        | 112d | 18 |
| FBgn0027571 | 944.34  | 38  | 1 | NAISVEIAPHGLLQAILK              | 112d | 18 |
| FBgn0027571 | 1181.91 | 53  | 1 | QSPIFFISPIEGFASALEPLAK          | 112d | 18 |
| FBgn0027571 | 1348.4  | 43  | 2 | RLEVPAYGLQYTEAVPSDSLESAAK       | 112d | 18 |
| FBgn0027571 | 776.6   | 46  | 1 | AAPQLDLGGGHYVPR                 | 122d | 18 |
| FBgn0027571 | 1297.06 | 81  | 2 | ETYEEIGLNPADVYVEAHGTGTK         | 122d | 18 |
| FBgn0027571 | 545.03  | 52  | 1 | FSLTSTLYR                       | 122d | 18 |
| FBgn0027571 | 1312.8  | 74  | 2 | ITIPESIDNEELPLEEQTPSAVAK        | 122d | 18 |
| FBgn0027571 | 1128.69 | 68  | 2 | LETQQATLQVEHAYVNALVK            | 122d | 18 |
| FBgn0027571 | 1182.21 | 68  | 2 | QSPIFFISPIEGFASALEPLAK          | 122d | 18 |
| FBgn0027571 | 1348.21 | 38  | 2 | RLEVPAYGLQYTEAVPSDSLESAAK       | 122d | 18 |
| FBgn0027571 | 944.35  | 39  | 1 | WISTSIPESAWNTPVAK               | 122d | 18 |
| FBgn0027571 | 776.37  | 72  | 2 | AAPQLDLGGGHYVPR                 | 132d | 18 |
| FBgn0027571 | 1297.13 | 56  | 1 | ETYEEIGLNPADVYVEAHGTGTK         | 132d | 18 |
| FBgn0027571 | 1312.77 | 54  | 1 | ITIPESIDNEELPLEEQTPSAVAK        | 132d | 18 |
| FBgn0027571 | 1128.78 | 72  | 2 | LETQQATLQVEHAYVNALVK            | 132d | 18 |
| FBgn0027571 | 640.94  | 60  | 1 | LPESTIEEFK                      | 132d | 18 |

|             |         |    |   |                                    |      |    |
|-------------|---------|----|---|------------------------------------|------|----|
| FBgn0027571 | 1202.73 | 46 | 1 | TGAVVPLPTSVFNDQQVEQAFR             | 132d | 18 |
| FBgn0027571 | 1144.31 | 59 | 1 | VDNALVAGAGLILKPTMSLQFK             | 132d | 18 |
| FBgn0027571 | 1297.26 | 78 | 1 | ETYEEIGLNPADVYVEAHGTGTK            | 142d | 18 |
| FBgn0027571 | 1312.78 | 61 | 1 | ITIPESIDNEELPLEEQTPSAVAK           | 142d | 18 |
| FBgn0027571 | 738.81  | 71 | 1 | KLELADGYQPTLK                      | 142d | 18 |
| FBgn0027571 | 1128.78 | 75 | 1 | LETQQATLQVEHAYVNALVK               | 142d | 18 |
| FBgn0027571 | 671.54  | 35 | 1 | LLIVIPTWEEK                        | 142d | 18 |
| FBgn0027571 | 1182.3  | 44 | 1 | QSPIFFISPIEGFASALEPLAK             | 142d | 18 |
| FBgn0027571 | 1202.77 | 47 | 1 | TGAVVPLPTSVFNDQQVEQAFR             | 142d | 18 |
| FBgn0027571 | 745.03  | 38 | 1 | TNVTLVKPTDNSAK                     | 142d | 18 |
| FBgn0027571 | 776.57  | 61 | 2 | AAPQLDLGGGHYVPR                    | 2d   | 28 |
| FBgn0027571 | 1470.37 | 48 | 1 | AMDGGADV KPAAAAPAAAAGVPEANITSGGSSR | 2d   | 28 |
| FBgn0027571 | 552.82  | 59 | 2 | DALIEDQTAK                         | 2d   | 28 |
| FBgn0027571 | 1028.01 | 49 | 1 | DSDLENFDQQFFGVHQB                  | 2d   | 28 |
| FBgn0027571 | 759.57  | 42 | 1 | EDDAFLAGHTIDGR                     | 2d   | 28 |
| FBgn0027571 | 1174.58 | 75 | 2 | EEQVETGLPVQWYSINVIK                | 2d   | 28 |
| FBgn0027571 | 1297.05 | 80 | 2 | ETYEEIGLNPADVYVEAHGTGTK            | 2d   | 28 |
| FBgn0027571 | 731.55  | 77 | 3 | FAEEVITAEPQR                       | 2d   | 28 |
| FBgn0027571 | 1312.85 | 75 | 3 | ITIPESIDNEELPLEEQTPSAVAK           | 2d   | 28 |
| FBgn0027571 | 738.68  | 71 | 3 | KLELADGYQPTLK                      | 2d   | 28 |
| FBgn0027571 | 1128.62 | 76 | 2 | LETQQATLQVEHAYVNALVK               | 2d   | 28 |
| FBgn0027571 | 1270.19 | 63 | 1 | LEVPAYGLQYTEAVPSDSLESAAK           | 2d   | 28 |
| FBgn0027571 | 671.09  | 43 | 2 | LLIVIPTWEEK                        | 2d   | 28 |
| FBgn0027571 | 1182.04 | 60 | 2 | QSPIFFISPIEGFASALEPLAK             | 2d   | 28 |
| FBgn0027571 | 1202.4  | 74 | 1 | TGAVVPLPTSVFNDQQVEQAFR             | 2d   | 28 |
| FBgn0027571 | 552.76  | 57 | 2 | TLENSIASIR                         | 2d   | 28 |
| FBgn0027571 | 744.78  | 69 | 2 | TNVTLVKPTDNSAK                     | 2d   | 28 |
| FBgn0027571 | 928.84  | 48 | 2 | VGDPQEVNSITDFCK                    | 2d   | 28 |
| FBgn0027571 | 944.71  | 52 | 2 | WISTSIPESAWNTPVAK                  | 2d   | 28 |
| FBgn0027571 | 1064.18 | 38 | 1 | YQFVPNINTTDLNENSEK                 | 2d   | 28 |
| FBgn0027571 | 776.49  | 51 | 2 | AAPQLDLGGGHYVPR                    | 12d  | 28 |
| FBgn0027571 | 1174.74 | 64 | 1 | EEQVETGLPVQWYSINVIK                | 12d  | 28 |

|             |         |     |   |                                 |     |    |
|-------------|---------|-----|---|---------------------------------|-----|----|
| FBgn0027571 | 1297.02 | 88  | 3 | ETYEEIGLNPADVYVEAHGTGTK         | 12d | 28 |
| FBgn0027571 | 731.33  | 52  | 2 | FAEEVITAEPQR                    | 12d | 28 |
| FBgn0027571 | 1312.47 | 78  | 6 | ITIPESIDNEELPLEEQTPSAVAK        | 12d | 28 |
| FBgn0027571 | 738.95  | 70  | 2 | KLELADGYQPTLK                   | 12d | 28 |
| FBgn0027571 | 1128.56 | 79  | 2 | LETQQATLQVEHAYVNALVK            | 12d | 28 |
| FBgn0027571 | 1269.99 | 54  | 4 | LEVPAYGLQYTEAVPSDSLESAAK        | 12d | 28 |
| FBgn0027571 | 641.05  | 69  | 3 | LPESSTIEEFK                     | 12d | 28 |
| FBgn0027571 | 1182.07 | 76  | 1 | QSPIFFISPIEGFASALEPLAK          | 12d | 28 |
| FBgn0027571 | 1348.27 | 62  | 2 | RLEVPAYGLQYTEAVPSDSLESAAK       | 12d | 28 |
| FBgn0027571 | 1175.39 | 52  | 2 | TFEAVEQLLESASTNADDDEYLQLINEIHSK | 12d | 28 |
| FBgn0027571 | 1202.78 | 81  | 1 | TGAVVPLPTSVFNDQQVEQAFR          | 12d | 28 |
| FBgn0027571 | 552.58  | 63  | 1 | TLENSIASIR                      | 12d | 28 |
| FBgn0027571 | 1064.11 | 51  | 1 | YQFVPNINTTDLNENSEK              | 12d | 28 |
| FBgn0027571 | 776.53  | 47  | 2 | AAPQLDLGGGHYVPR                 | 22d | 28 |
| FBgn0027571 | 524.65  | 36  | 1 | GYDYGGIFR                       | 22d | 28 |
| FBgn0027571 | 1312.53 | 70  | 4 | ITIPESIDNEELPLEEQTPSAVAK        | 22d | 28 |
| FBgn0027571 | 1128.83 | 59  | 2 | LETQQATLQVEHAYVNALVK            | 22d | 28 |
| FBgn0027571 | 1348.26 | 50  | 1 | RLEVPAYGLQYTEAVPSDSLESAAK       | 22d | 28 |
| FBgn0027571 | 1202.84 | 84  | 3 | TGAVVPLPTSVFNDQQVEQAFR          | 22d | 28 |
| FBgn0027571 | 944.71  | 47  | 1 | WISTSIPESAWNTPVAK               | 22d | 28 |
| FBgn0027571 | 1174.72 | 73  | 3 | EEQVETGLPVQWYSDINVIK            | 32d | 28 |
| FBgn0027571 | 1297.13 | 101 | 2 | ETYEEIGLNPADVYVEAHGTGTK         | 32d | 28 |
| FBgn0027571 | 976     | 39  | 1 | FAELMSNEITQPVETIK               | 32d | 28 |
| FBgn0027571 | 1312.81 | 63  | 5 | ITIPESIDNEELPLEEQTPSAVAK        | 32d | 28 |
| FBgn0027571 | 738.72  | 67  | 2 | KLELADGYQPTLK                   | 32d | 28 |
| FBgn0027571 | 752.9   | 68  | 1 | LETQQATLQVEHAYVNALVK            | 32d | 28 |
| FBgn0027571 | 1202.48 | 70  | 2 | TGAVVPLPTSVFNDQQVEQAFR          | 32d | 28 |
| FBgn0027571 | 552.78  | 43  | 1 | TLENSIASIR                      | 32d | 28 |
| FBgn0027571 | 763.18  | 77  | 1 | VDNALVAGAGLILKPTMSLQFK          | 32d | 28 |
| FBgn0027571 | 776.33  | 62  | 3 | AAPQLDLGGGHYVPR                 | 36d | 28 |
| FBgn0027571 | 1174.75 | 59  | 2 | EEQVETGLPVQWYSDINVIK            | 36d | 28 |
| FBgn0027571 | 1297.36 | 109 | 3 | ETYEEIGLNPADVYVEAHGTGTK         | 36d | 28 |

|             |         |     |   |                          |     |    |
|-------------|---------|-----|---|--------------------------|-----|----|
| FBgn0027571 | 731.21  | 77  | 3 | FAEEVITAEPQR             | 36d | 28 |
| FBgn0027571 | 806.05  | 48  | 1 | FGFVAVQEQLGATR           | 36d | 28 |
| FBgn0027571 | 580.18  | 58  | 3 | HFELLSALTK               | 36d | 28 |
| FBgn0027571 | 1312.49 | 75  | 5 | ITIPESIDNEELPLEEQTPSAVAK | 36d | 28 |
| FBgn0027571 | 738.97  | 78  | 2 | KLELADGYQPTLK            | 36d | 28 |
| FBgn0027571 | 1128.67 | 69  | 2 | LETQQATLQVEHAYVNALVK     | 36d | 28 |
| FBgn0027571 | 640.86  | 58  | 1 | LPESTIEEFK               | 36d | 28 |
| FBgn0027571 | 766     | 71  | 1 | MAAVGLSWEDAHSR           | 36d | 28 |
| FBgn0027571 | 1182.17 | 53  | 1 | QSPIFFISPIEGFASALEPLAK   | 36d | 28 |
| FBgn0027571 | 1202.5  | 69  | 3 | TGAVVPLPTSVFNDQQVEQAFR   | 36d | 28 |
| FBgn0027571 | 552.69  | 47  | 2 | TLENSIASIR               | 36d | 28 |
| FBgn0027571 | 763.18  | 61  | 2 | VDNALVAGAGLILKPTMSLQFK   | 36d | 28 |
| FBgn0027571 | 1064.15 | 60  | 2 | YQFVPNINTTDLNENSEK       | 36d | 28 |
| FBgn0027571 | 776.24  | 59  | 2 | AAPQLDLGGGGHYVPR         | 42d | 28 |
| FBgn0027571 | 1174.71 | 79  | 3 | EEQVETGLPVQWYSDINVIK     | 42d | 28 |
| FBgn0027571 | 1297.02 | 109 | 2 | ETYEEIGLNPADVVEAHGTGTK   | 42d | 28 |
| FBgn0027571 | 731.42  | 65  | 2 | FAEEVITAEPQR             | 42d | 28 |
| FBgn0027571 | 524.85  | 51  | 3 | GYDYGGIFR                | 42d | 28 |
| FBgn0027571 | 1312.59 | 65  | 5 | ITIPESIDNEELPLEEQTPSAVAK | 42d | 28 |
| FBgn0027571 | 738.89  | 72  | 3 | KLELADGYQPTLK            | 42d | 28 |
| FBgn0027571 | 1270.09 | 42  | 2 | LEVPAYGLQYTEAVPSDSLESAK  | 42d | 28 |
| FBgn0027571 | 1148.78 | 60  | 1 | LKSDLENFDQQFFGVHQK       | 42d | 28 |
| FBgn0027571 | 671.42  | 38  | 1 | LLIVIPTWEEK              | 42d | 28 |
| FBgn0027571 | 765.91  | 61  | 1 | MAAVGLSWEDAHSR           | 42d | 28 |
| FBgn0027571 | 1182.17 | 68  | 3 | QSPIFFISPIEGFASALEPLAK   | 42d | 28 |
| FBgn0027571 | 1202.46 | 77  | 3 | TGAVVPLPTSVFNDQQVEQAFR   | 42d | 28 |
| FBgn0027571 | 552.89  | 42  | 1 | TLENSIASIR               | 42d | 28 |
| FBgn0027571 | 944.39  | 35  | 1 | WISTSIPESAWNTPVAK        | 42d | 28 |
| FBgn0027571 | 1064.18 | 34  | 1 | YQFVPNINTTDLNENSEK       | 42d | 28 |
| FBgn0027571 | 776.61  | 74  | 2 | AAPQLDLGGGGHYVPR         | 46d | 28 |
| FBgn0027571 | 1174.55 | 60  | 3 | EEQVETGLPVQWYSDINVIK     | 46d | 28 |
| FBgn0027571 | 1297    | 114 | 3 | ETYEEIGLNPADVVEAHGTGTK   | 46d | 28 |

|             |         |     |   |                          |     |    |
|-------------|---------|-----|---|--------------------------|-----|----|
| FBgn0027571 | 975.97  | 72  | 3 | FAELMSNEITQPVETIK        | 46d | 28 |
| FBgn0027571 | 805.93  | 63  | 1 | FGFVAVQEQLGATR           | 46d | 28 |
| FBgn0027571 | 1312.52 | 68  | 3 | ITIPESIDNEELPLEEQTPSAVAK | 46d | 28 |
| FBgn0027571 | 738.88  | 70  | 3 | KLELADGYQPTLK            | 46d | 28 |
| FBgn0027571 | 1128.62 | 79  | 1 | LETQQATLQVEHAYVNALVK     | 46d | 28 |
| FBgn0027571 | 1269.9  | 47  | 3 | LEVPAYGLQYTEAVPSDSLESAAK | 46d | 28 |
| FBgn0027571 | 766.04  | 36  | 1 | LKSDLENFDQQFFGVHQB       | 46d | 28 |
| FBgn0027571 | 1202.53 | 72  | 3 | TGAVVPLPTSVFNDQQVEQAFR   | 46d | 28 |
| FBgn0027571 | 763.18  | 51  | 1 | VDNALVAGAGLILKPTMSLQFK   | 46d | 28 |
| FBgn0027571 | 776.31  | 57  | 3 | AAPQLDLGGGHYVPR          | 50d | 28 |
| FBgn0027571 | 1174.72 | 78  | 3 | EEQVETGLPVQWYSINVIK      | 50d | 28 |
| FBgn0027571 | 1297.01 | 108 | 2 | ETYEEIGLNPADVYVEAHGTGTK  | 50d | 28 |
| FBgn0027571 | 731.56  | 65  | 3 | FAEEVITAEPQR             | 50d | 28 |
| FBgn0027571 | 975.95  | 48  | 1 | FAELMSNEITQPVETIK        | 50d | 28 |
| FBgn0027571 | 1312.5  | 71  | 6 | ITIPESIDNEELPLEEQTPSAVAK | 50d | 28 |
| FBgn0027571 | 738.86  | 82  | 2 | KLELADGYQPTLK            | 50d | 28 |
| FBgn0027571 | 1269.97 | 47  | 1 | LEVPAYGLQYTEAVPSDSLESAAK | 50d | 28 |
| FBgn0027571 | 641.05  | 76  | 1 | LPESTIEEFK               | 50d | 28 |
| FBgn0027571 | 774.85  | 46  | 1 | MLELTHEAIIDAGLNPSDLR     | 50d | 28 |
| FBgn0027571 | 776.33  | 64  | 1 | AAPQLDLGGGHYVPR          | 52d | 28 |
| FBgn0027571 | 1297    | 91  | 3 | ETYEEIGLNPADVYVEAHGTGTK  | 52d | 28 |
| FBgn0027571 | 976.09  | 46  | 1 | FAELMSNEITQPVETIK        | 52d | 28 |
| FBgn0027571 | 1312.64 | 71  | 4 | ITIPESIDNEELPLEEQTPSAVAK | 52d | 28 |
| FBgn0027571 | 739.03  | 80  | 2 | KLELADGYQPTLK            | 52d | 28 |
| FBgn0027571 | 1251.8  | 68  | 3 | LAADALPGDLAEQDCVLGLEFAGR | 52d | 28 |
| FBgn0027571 | 1270.1  | 47  | 2 | LEVPAYGLQYTEAVPSDSLESAAK | 52d | 28 |
| FBgn0027571 | 671.32  | 42  | 1 | LLIVIPTWEEK              | 52d | 28 |
| FBgn0027571 | 774.89  | 50  | 1 | MLELTHEAIIDAGLNPSDLR     | 52d | 28 |
| FBgn0027571 | 944.67  | 54  | 1 | NAISVEIAPHLLQAILK        | 52d | 28 |
| FBgn0027571 | 1202.75 | 81  | 3 | TGAVVPLPTSVFNDQQVEQAFR   | 52d | 28 |
| FBgn0027571 | 776.42  | 67  | 2 | AAPQLDLGGGHYVPR          | 56d | 28 |
| FBgn0027571 | 1007.31 | 34  | 1 | CADVLKPEGVDLIDVLTR       | 56d | 28 |

|             |         |    |   |                          |     |    |
|-------------|---------|----|---|--------------------------|-----|----|
| FBgn0027571 | 604.85  | 46 | 1 | DTSFEQLVLR               | 56d | 28 |
| FBgn0027571 | 1174.45 | 42 | 1 | EEQVETGLPVQWYSINVIK      | 56d | 28 |
| FBgn0027571 | 935.2   | 36 | 1 | ENGFLILEETLPTYTK         | 56d | 28 |
| FBgn0027571 | 805.63  | 39 | 1 | FGFVAVQEQLGATR           | 56d | 28 |
| FBgn0027571 | 1312.5  | 66 | 3 | ITIPESIDNEELPLEEQTPSAVAK | 56d | 28 |
| FBgn0027571 | 1128.78 | 80 | 2 | LETQQATLQVEHAYVNALVK     | 56d | 28 |
| FBgn0027571 | 1269.93 | 49 | 3 | LEVPAYGLQYTEAVPSDSLESAAK | 56d | 28 |
| FBgn0027571 | 766.08  | 43 | 1 | LKSDLENFDQQFFGVHQK       | 56d | 28 |
| FBgn0027571 | 671.02  | 43 | 2 | LLIVIPTWEEK              | 56d | 28 |
| FBgn0027571 | 1182.25 | 87 | 3 | QSPIFFISPIEGFASALEPLAK   | 56d | 28 |
| FBgn0027571 | 1202.56 | 56 | 3 | TGAVVPLPTSVFNDQQVEQAFR   | 56d | 28 |
| FBgn0027571 | 744.83  | 43 | 1 | TNVTLVKPTDNSAK           | 56d | 28 |
| FBgn0027580 | 953.28  | 50 | 3 | ENDVDAVHPGYGFLSER        | 2d  | 18 |
| FBgn0027580 | 774.21  | 40 | 1 | FLHGVLDTYFIDEHPQLFK      | 2d  | 18 |
| FBgn0027580 | 1177.1  | 80 | 3 | SVVEYLQGSIGIPHGGFPEPLR   | 2d  | 18 |
| FBgn0027580 | 997.13  | 40 | 1 | VAAIEAGVPIVPGTDGPVTTK    | 2d  | 18 |
| FBgn0027580 | 1083.75 | 41 | 1 | VFDSLNYLPNLILGMEAAGK     | 2d  | 18 |
| FBgn0027580 | 715.59  | 64 | 2 | VISHASDLQSSASK           | 2d  | 18 |
| FBgn0027580 | 881.73  | 62 | 3 | VTTEDPANDFQPNTGR         | 2d  | 18 |
| FBgn0027580 | 600.19  | 66 | 3 | EANLLLGDIK               | 22d | 18 |
| FBgn0027580 | 953.41  | 43 | 2 | ENDVDAVHPGYGFLSER        | 22d | 18 |
| FBgn0027580 | 682.18  | 65 | 1 | SDFQAVIDAGLR             | 22d | 18 |
| FBgn0027580 | 771.84  | 47 | 2 | SEVGAPMPGTVIDIR          | 22d | 18 |
| FBgn0027580 | 785.2   | 80 | 2 | SVVEYLQGSIGIPHGGFPEPLR   | 22d | 18 |
| FBgn0027580 | 997.21  | 38 | 1 | VAAIEAGVPIVPGTDGPVTTK    | 22d | 18 |
| FBgn0027580 | 877.12  | 47 | 1 | VAEGMTLPELGYTQDK         | 22d | 18 |
| FBgn0027580 | 645.64  | 55 | 3 | VGEEFDVPLER              | 22d | 18 |
| FBgn0027580 | 882.03  | 66 | 3 | VTTEDPANDFQPNTGR         | 22d | 18 |
| FBgn0027580 | 665.53  | 46 | 3 | YYTNLADELVK              | 22d | 18 |
| FBgn0027580 | 644.92  | 57 | 2 | DMAGLLKPESAR             | 42d | 18 |
| FBgn0027580 | 1101.28 | 39 | 2 | DVMSAALYPQVTNDFLNFR      | 42d | 18 |
| FBgn0027580 | 600.2   | 64 | 3 | EANLLLGDIK               | 42d | 18 |



|             |         |     |   |                        |     |    |
|-------------|---------|-----|---|------------------------|-----|----|
| FBgn0027580 | 953.36  | 55  | 2 | ENDVDAVHPGYGFLSER      | 42d | 18 |
| FBgn0027580 | 1160.6  | 80  | 3 | FLHGVLDTYFIDEHPQLFK    | 42d | 18 |
| FBgn0027580 | 577.01  | 38  | 1 | HIEVQLLGDK             | 42d | 18 |
| FBgn0027580 | 400.97  | 40  | 1 | LLITAIR                | 42d | 18 |
| FBgn0027580 | 682.3   | 86  | 5 | SDFAQAVIDAGLR          | 42d | 18 |
| FBgn0027580 | 1176.97 | 82  | 6 | SVVEYLQGSIGIPHGGFPEPLR | 42d | 18 |
| FBgn0027580 | 822.64  | 62  | 1 | TNIPFLNVLLENQK         | 42d | 18 |
| FBgn0027580 | 665.08  | 59  | 2 | VAAIEAGVPIVPGTDGPVTTK  | 42d | 18 |
| FBgn0027580 | 1083.44 | 52  | 3 | VFDSLNYLPNLIIGMEAAGK   | 42d | 18 |
| FBgn0027580 | 665.24  | 74  | 3 | YYTNLADELVK            | 42d | 18 |
| FBgn0027580 | 601.51  | 53  | 2 | FIGPSPEVVQK            | 62d | 18 |
| FBgn0027580 | 774.19  | 46  | 1 | FLHGVLDTYFIDEHPQLFK    | 62d | 18 |
| FBgn0027580 | 400.97  | 41  | 2 | LLITAIR                | 62d | 18 |
| FBgn0027580 | 371.12  | 34  | 1 | LPIEIR                 | 62d | 18 |
| FBgn0027580 | 1255.25 | 44  | 1 | LQVEHTVTEEITGIDLVSQIR  | 62d | 18 |
| FBgn0027580 | 682.2   | 105 | 2 | SDFAQAVIDAGLR          | 62d | 18 |
| FBgn0027580 | 1177.08 | 101 | 2 | SVVEYLQGSIGIPHGGFPEPLR | 62d | 18 |
| FBgn0027580 | 645.74  | 50  | 2 | VGEEFDVPLER            | 62d | 18 |
| FBgn0027580 | 665.16  | 54  | 2 | YYTNLADELVK            | 62d | 18 |
| FBgn0027580 | 644.7   | 46  | 1 | DMAGLLKPESAR           | 82d | 18 |
| FBgn0027580 | 1101.37 | 43  | 1 | DVMSAALYPQVTNDFLNFR    | 82d | 18 |
| FBgn0027580 | 600.08  | 74  | 3 | EANLLLGDIK             | 82d | 18 |
| FBgn0027580 | 953.24  | 43  | 1 | ENDVDAVHPGYGFLSER      | 82d | 18 |
| FBgn0027580 | 601.26  | 46  | 1 | FIGPSPEVVQK            | 82d | 18 |
| FBgn0027580 | 1255.17 | 61  | 2 | LQVEHTVTEEITGIDLVSQIR  | 82d | 18 |
| FBgn0027580 | 682.58  | 94  | 2 | SDFAQAVIDAGLR          | 82d | 18 |
| FBgn0027580 | 1176.77 | 64  | 1 | SVVEYLQGSIGIPHGGFPEPLR | 82d | 18 |
| FBgn0027580 | 997     | 43  | 1 | VAAIEAGVPIVPGTDGPVTTK  | 82d | 18 |
| FBgn0027580 | 1083.61 | 55  | 1 | VFDSLNYLPNLIIGMEAAGK   | 82d | 18 |
| FBgn0027580 | 645.75  | 50  | 2 | VGEEFDVPLER            | 82d | 18 |
| FBgn0027580 | 881.77  | 57  | 3 | VTTEDPANDFQPNTGR       | 82d | 18 |
| FBgn0027580 | 476.73  | 45  | 1 | VVEIAPAPR              | 82d | 18 |

|             |         |     |   |                        |      |    |
|-------------|---------|-----|---|------------------------|------|----|
| FBgn0027580 | 665.57  | 40  | 1 | YYTNLADELVK            | 82d  | 18 |
| FBgn0027580 | 1101.72 | 46  | 2 | DVMSAALYPQVTNDFLNFR    | 102d | 18 |
| FBgn0027580 | 600.2   | 53  | 1 | EANLLLGDIK             | 102d | 18 |
| FBgn0027580 | 953.03  | 42  | 1 | ENDVDAVHPGYGFLSER      | 102d | 18 |
| FBgn0027580 | 1160.8  | 80  | 1 | FLHGVLDTYFIDEHPQLFK    | 102d | 18 |
| FBgn0027580 | 576.98  | 54  | 1 | HIEVQLLGDK             | 102d | 18 |
| FBgn0027580 | 1255.11 | 109 | 3 | LQVEHTVTEEITGIDLVSQIR  | 102d | 18 |
| FBgn0027580 | 770.67  | 40  | 1 | SEVGAPMPGTVIDIR        | 102d | 18 |
| FBgn0027580 | 784.32  | 95  | 2 | SVVEYLQGSIGIPHGGFPEPLR | 102d | 18 |
| FBgn0027580 | 996.93  | 40  | 1 | VAAIEAGVPIVPGTDGPVTTK  | 102d | 18 |
| FBgn0027580 | 876.45  | 43  | 3 | VAEGMTLPELGYTQDK       | 102d | 18 |
| FBgn0027580 | 722.84  | 65  | 2 | VFDSLNYLPNLILGMEAAGK   | 102d | 18 |
| FBgn0027580 | 645.65  | 44  | 1 | VGEEFDVPLER            | 102d | 18 |
| FBgn0027580 | 881.75  | 69  | 3 | VTTEDPANDFQPNTGR       | 102d | 18 |
| FBgn0027580 | 665.58  | 61  | 2 | YYTNLADELVK            | 102d | 18 |
| FBgn0027580 | 600.5   | 70  | 1 | EANLLLGDIK             | 112d | 18 |
| FBgn0027580 | 953.34  | 42  | 1 | ENDVDAVHPGYGFLSER      | 112d | 18 |
| FBgn0027580 | 774.08  | 53  | 3 | FLHGVLDTYFIDEHPQLFK    | 112d | 18 |
| FBgn0027580 | 1159.82 | 35  | 1 | LDSASAYAGAIISPYDSSLVK  | 112d | 18 |
| FBgn0027580 | 1255.32 | 96  | 3 | LQVEHTVTEEITGIDLVSQIR  | 112d | 18 |
| FBgn0027580 | 682.46  | 71  | 2 | SDFAQAVIDAQLR          | 112d | 18 |
| FBgn0027580 | 771.54  | 34  | 1 | SEVGAPMPGTVIDIR        | 112d | 18 |
| FBgn0027580 | 1176.96 | 87  | 3 | SVVEYLQGSIGIPHGGFPEPLR | 112d | 18 |
| FBgn0027580 | 646.05  | 61  | 2 | VGEEFDVPLER            | 112d | 18 |
| FBgn0027580 | 716.09  | 58  | 2 | VISHASDLQSSASK         | 112d | 18 |
| FBgn0027580 | 881.76  | 41  | 2 | VTTEDPANDFQPNTGR       | 112d | 18 |
| FBgn0027580 | 600.22  | 59  | 2 | EANLLLGDIK             | 122d | 18 |
| FBgn0027580 | 1160.68 | 74  | 2 | FLHGVLDTYFIDEHPQLFK    | 122d | 18 |
| FBgn0027580 | 771.07  | 40  | 1 | SEVGAPMPGTVIDIR        | 122d | 18 |
| FBgn0027580 | 784.66  | 65  | 1 | SVVEYLQGSIGIPHGGFPEPLR | 122d | 18 |
| FBgn0027580 | 997.26  | 43  | 1 | VAAIEAGVPIVPGTDGPVTTK  | 122d | 18 |
| FBgn0027580 | 876.85  | 46  | 1 | VAEGMTLPELGYTQDK       | 122d | 18 |

|             |         |     |   |                        |      |    |
|-------------|---------|-----|---|------------------------|------|----|
| FBgn0027580 | 1082.77 | 39  | 1 | VFDSLNYLPNLILGMEAAGK   | 122d | 18 |
| FBgn0027580 | 645.73  | 45  | 1 | VGEEFDVPLER            | 122d | 18 |
| FBgn0027580 | 665.33  | 61  | 1 | YYTNLADELVK            | 122d | 18 |
| FBgn0027580 | 644.71  | 34  | 1 | DMAGLLKPESAR           | 132d | 18 |
| FBgn0027580 | 601.39  | 51  | 1 | FIGPSPEVVQK            | 132d | 18 |
| FBgn0027580 | 1255.37 | 101 | 2 | LQVEHTVTEEITGIDLVSQIR  | 132d | 18 |
| FBgn0027580 | 772.13  | 41  | 1 | SEVGAPMPGTVIDIR        | 132d | 18 |
| FBgn0027580 | 1177.26 | 93  | 3 | SVVEYLQGSIGIPHGGFPEPLR | 132d | 18 |
| FBgn0027580 | 646.01  | 37  | 1 | VGEEFDVPLER            | 132d | 18 |
| FBgn0027580 | 665.21  | 54  | 1 | YYTNLADELVK            | 132d | 18 |
| FBgn0027580 | 600.48  | 45  | 2 | EANLLLGDIK             | 142d | 18 |
| FBgn0027580 | 953.46  | 35  | 1 | ENDVDAVHPGYGFLSER      | 142d | 18 |
| FBgn0027580 | 773.9   | 68  | 2 | FLHGVLDTYFIDEHPQLFK    | 142d | 18 |
| FBgn0027580 | 456.48  | 54  | 1 | HGLPVIFK               | 142d | 18 |
| FBgn0027580 | 772.09  | 44  | 2 | SEVGAPMPGTVIDIR        | 142d | 18 |
| FBgn0027580 | 784.34  | 90  | 2 | SVVEYLQGSIGIPHGGFPEPLR | 142d | 18 |
| FBgn0027580 | 796.56  | 43  | 1 | TLYAPFECTTTMR          | 142d | 18 |
| FBgn0027580 | 665.23  | 53  | 3 | YYTNLADELVK            | 142d | 18 |
| FBgn0027580 | 644.76  | 42  | 1 | DMAGLLKPESAR           | 2d   | 28 |
| FBgn0027580 | 600.3   | 47  | 1 | EANLLLGDIK             | 2d   | 28 |
| FBgn0027580 | 953.43  | 53  | 3 | ENDVDAVHPGYGFLSER      | 2d   | 28 |
| FBgn0027580 | 601.25  | 45  | 2 | FIGPSPEVVQK            | 2d   | 28 |
| FBgn0027580 | 784.85  | 96  | 2 | SVVEYLQGSIGIPHGGFPEPLR | 2d   | 28 |
| FBgn0027580 | 810.52  | 39  | 1 | TVSEYSAYWEQTR          | 2d   | 28 |
| FBgn0027580 | 997.2   | 39  | 2 | VAAIEAGVPIVPGTDGPVTTK  | 2d   | 28 |
| FBgn0027580 | 1083.64 | 43  | 1 | VFDSLNYLPNLILGMEAAGK   | 2d   | 28 |
| FBgn0027580 | 645.79  | 55  | 1 | VGEEFDVPLER            | 2d   | 28 |
| FBgn0027580 | 715.77  | 54  | 1 | VISHASDLQSSASK         | 2d   | 28 |
| FBgn0027580 | 881.61  | 74  | 3 | VTTEDPANDFQPNTGR       | 2d   | 28 |
| FBgn0027580 | 476.67  | 55  | 2 | VVEIAPAPR              | 2d   | 28 |
| FBgn0027580 | 665.29  | 53  | 1 | YYTNLADELVK            | 2d   | 28 |
| FBgn0027580 | 645.02  | 60  | 2 | DMAGLLKPESAR           | 12d  | 28 |

|             |         |    |   |                                           |     |    |
|-------------|---------|----|---|-------------------------------------------|-----|----|
| FBgn0027580 | 600.56  | 51 | 2 | EANLLLGDIK                                | 12d | 28 |
| FBgn0027580 | 953.26  | 49 | 3 | ENDVDAVHPGYGFLSER                         | 12d | 28 |
| FBgn0027580 | 601.41  | 35 | 1 | FIGPSPEVVQK                               | 12d | 28 |
| FBgn0027580 | 774.14  | 61 | 2 | FLHGVLDTYFIDEHPQLFK                       | 12d | 28 |
| FBgn0027580 | 713.73  | 57 | 1 | GKTLVKALAVSADLKPNGIR                      | 12d | 28 |
| FBgn0027580 | 1454.18 | 63 | 1 | LLNYMGEVLVNGPQTPLATTLKPALVSPHVPEVPLVTEPPK | 12d | 28 |
| FBgn0027580 | 682.41  | 40 | 1 | SDFAQAVIDAGLR                             | 12d | 28 |
| FBgn0027580 | 772.03  | 53 | 3 | SEVGAPMPGTVIDIR                           | 12d | 28 |
| FBgn0027580 | 1177.17 | 87 | 3 | SVVEYLQGSIGIPHGGFPEPLR                    | 12d | 28 |
| FBgn0027580 | 876.98  | 37 | 1 | VAEGMTLPELGYTQDK                          | 12d | 28 |
| FBgn0027580 | 645.52  | 42 | 1 | VGEEFDVPLER                               | 12d | 28 |
| FBgn0027580 | 715.57  | 73 | 3 | VISHASDLQSSASK                            | 12d | 28 |
| FBgn0027580 | 881.51  | 65 | 2 | VTTEDPANDFQPNTGR                          | 12d | 28 |
| FBgn0027580 | 664.64  | 74 | 2 | YYTNLADELVK                               | 12d | 28 |
| FBgn0027580 | 600.49  | 73 | 3 | EANLLLGDIK                                | 22d | 28 |
| FBgn0027580 | 953.34  | 45 | 3 | ENDVDAVHPGYGFLSER                         | 22d | 28 |
| FBgn0027580 | 897.8   | 68 | 1 | GLPPVEAYLNIPELIR                          | 22d | 28 |
| FBgn0027580 | 1255.24 | 60 | 2 | LQVEHTVTEEITGIDLVQSQIR                    | 22d | 28 |
| FBgn0027580 | 682.34  | 94 | 3 | SDFAQAVIDAGLR                             | 22d | 28 |
| FBgn0027580 | 771.97  | 52 | 2 | SEVGAPMPGTVIDIR                           | 22d | 28 |
| FBgn0027580 | 1176.99 | 88 | 2 | SVVEYLQGSIGIPHGGFPEPLR                    | 22d | 28 |
| FBgn0027580 | 876.99  | 45 | 1 | VAEGMTLPELGYTQDK                          | 22d | 28 |
| FBgn0027580 | 881.66  | 59 | 1 | VTTEDPANDFQPNTGR                          | 22d | 28 |
| FBgn0027580 | 665.42  | 53 | 2 | YYTNLADELVK                               | 22d | 28 |
| FBgn0027580 | 644.96  | 58 | 2 | DMAGLLKPESAR                              | 32d | 28 |
| FBgn0027580 | 600.5   | 71 | 2 | EANLLLGDIK                                | 32d | 28 |
| FBgn0027580 | 953.32  | 43 | 2 | ENDVDAVHPGYGFLSER                         | 32d | 28 |
| FBgn0027580 | 774.14  | 37 | 1 | FLHGVLDTYFIDEHPQLFK                       | 32d | 28 |
| FBgn0027580 | 456.26  | 41 | 1 | HGLPVIFK                                  | 32d | 28 |
| FBgn0027580 | 682.52  | 84 | 3 | SDFAQAVIDAGLR                             | 32d | 28 |
| FBgn0027580 | 771.95  | 71 | 3 | SEVGAPMPGTVIDIR                           | 32d | 28 |
| FBgn0027580 | 785.03  | 77 | 4 | SVVEYLQGSIGIPHGGFPEPLR                    | 32d | 28 |

|             |         |     |   |                        |     |    |
|-------------|---------|-----|---|------------------------|-----|----|
| FBgn0027580 | 876.84  | 55  | 1 | VAEGMTLPELGYTQDK       | 32d | 28 |
| FBgn0027580 | 1083.34 | 76  | 2 | VFDSLNYLPNLILGMEAAGK   | 32d | 28 |
| FBgn0027580 | 645.88  | 51  | 4 | VGEEFDVPLER            | 32d | 28 |
| FBgn0027580 | 881.74  | 66  | 3 | VTTEDPANDFQPNTGR       | 32d | 28 |
| FBgn0027580 | 645     | 48  | 2 | DMAGLLKPESAR           | 36d | 28 |
| FBgn0027580 | 734.8   | 41  | 1 | DVMSAALYPQVTNDFLNFR    | 36d | 28 |
| FBgn0027580 | 599.95  | 72  | 3 | EANLLLGDIIK            | 36d | 28 |
| FBgn0027580 | 953.66  | 52  | 3 | ENDVDAVHPGYGFLSER      | 36d | 28 |
| FBgn0027580 | 601.35  | 59  | 3 | FIGPSPEVVQK            | 36d | 28 |
| FBgn0027580 | 1160.61 | 79  | 1 | FLHGVLDTYFIDEHPQLFK    | 36d | 28 |
| FBgn0027580 | 576.99  | 57  | 1 | HIEVQLLGDK             | 36d | 28 |
| FBgn0027580 | 1255.15 | 79  | 2 | LQVEHTVTEEITGIDLVSQIR  | 36d | 28 |
| FBgn0027580 | 682.44  | 98  | 2 | SDFAQAVIDAGLR          | 36d | 28 |
| FBgn0027580 | 771.8   | 44  | 2 | SEVGAPMPGTVIDIR        | 36d | 28 |
| FBgn0027580 | 785.21  | 77  | 4 | SVVEYLQGSIGIPHGGFPEPLR | 36d | 28 |
| FBgn0027580 | 876.87  | 35  | 1 | VAEGMTLPELGYTQDK       | 36d | 28 |
| FBgn0027580 | 1083.53 | 51  | 3 | VFDSLNYLPNLILGMEAAGK   | 36d | 28 |
| FBgn0027580 | 644.98  | 46  | 4 | VGEEFDVPLER            | 36d | 28 |
| FBgn0027580 | 881.65  | 66  | 3 | VTTEDPANDFQPNTGR       | 36d | 28 |
| FBgn0027580 | 665.25  | 62  | 2 | YYTNLADELVK            | 36d | 28 |
| FBgn0027580 | 734.81  | 41  | 2 | DVMSAALYPQVTNDFLNFR    | 42d | 28 |
| FBgn0027580 | 600.34  | 74  | 5 | EANLLLGDIIK            | 42d | 28 |
| FBgn0027580 | 953.4   | 54  | 2 | ENDVDAVHPGYGFLSER      | 42d | 28 |
| FBgn0027580 | 601.19  | 54  | 3 | FIGPSPEVVQK            | 42d | 28 |
| FBgn0027580 | 774.19  | 61  | 1 | FLHGVLDTYFIDEHPQLFK    | 42d | 28 |
| FBgn0027580 | 576.95  | 50  | 2 | HIEVQLLGDK             | 42d | 28 |
| FBgn0027580 | 1255.27 | 96  | 5 | LQVEHTVTEEITGIDLVSQIR  | 42d | 28 |
| FBgn0027580 | 682.39  | 93  | 2 | SDFAQAVIDAGLR          | 42d | 28 |
| FBgn0027580 | 771.72  | 51  | 1 | SEVGAPMPGTVIDIR        | 42d | 28 |
| FBgn0027580 | 1177.27 | 106 | 6 | SVVEYLQGSIGIPHGGFPEPLR | 42d | 28 |
| FBgn0027580 | 810.8   | 49  | 1 | TVSEYSAYWEQTR          | 42d | 28 |
| FBgn0027580 | 877.11  | 43  | 1 | VAEGMTLPELGYTQDK       | 42d | 28 |

|             |         |     |   |                        |     |    |
|-------------|---------|-----|---|------------------------|-----|----|
| FBgn0027580 | 722.77  | 55  | 3 | VFDSLNYLPNLILGMEAAGK   | 42d | 28 |
| FBgn0027580 | 645.18  | 55  | 5 | VGEEFDVPLER            | 42d | 28 |
| FBgn0027580 | 715.65  | 59  | 2 | VISHASDLQSSASK         | 42d | 28 |
| FBgn0027580 | 881.74  | 77  | 3 | VTTEDPANDFQPNTGR       | 42d | 28 |
| FBgn0027580 | 665.4   | 60  | 1 | YYTNLADELVK            | 42d | 28 |
| FBgn0027580 | 734.85  | 44  | 1 | DVMSAALYPQVTNDFLNFR    | 46d | 28 |
| FBgn0027580 | 600.1   | 61  | 2 | EANLLLGDIK             | 46d | 28 |
| FBgn0027580 | 600.45  | 35  | 1 | EANLLLGDIKVTSSK        | 46d | 28 |
| FBgn0027580 | 953.31  | 42  | 2 | ENDVDAVHPGYGFLSER      | 46d | 28 |
| FBgn0027580 | 601.31  | 45  | 1 | FIGPSPEVVQK            | 46d | 28 |
| FBgn0027580 | 576.76  | 62  | 2 | HIEVQLLGDK             | 46d | 28 |
| FBgn0027580 | 699.61  | 66  | 2 | KMEDVEESFOR            | 46d | 28 |
| FBgn0027580 | 1255.35 | 100 | 3 | LQVEHTVTEEITGIDLVSQIR  | 46d | 28 |
| FBgn0027580 | 682.43  | 79  | 3 | SDFAQAVIDAGLR          | 46d | 28 |
| FBgn0027580 | 771.63  | 42  | 2 | SEVGAPMPGTVIDIR        | 46d | 28 |
| FBgn0027580 | 784.27  | 85  | 2 | SVVEYLQGSIGIPHGGFPEPLR | 46d | 28 |
| FBgn0027580 | 810.72  | 42  | 1 | TVSEYSAYWEQTR          | 46d | 28 |
| FBgn0027580 | 997.03  | 38  | 1 | VAAIEAGVPIVPGTDGPVTTK  | 46d | 28 |
| FBgn0027580 | 876.29  | 49  | 2 | VAEGMTLPELGYTQDK       | 46d | 28 |
| FBgn0027580 | 722.23  | 45  | 2 | VFDSLNYLPNLILGMEAAGK   | 46d | 28 |
| FBgn0027580 | 645.58  | 62  | 4 | VGEEFDVPLER            | 46d | 28 |
| FBgn0027580 | 881.73  | 71  | 3 | VTTEDPANDFQPNTGR       | 46d | 28 |
| FBgn0027580 | 665.37  | 62  | 3 | YYTNLADELVK            | 46d | 28 |
| FBgn0027580 | 1101.52 | 37  | 2 | DVMSAALYPQVTNDFLNFR    | 50d | 28 |
| FBgn0027580 | 600.29  | 67  | 5 | EANLLLGDIK             | 50d | 28 |
| FBgn0027580 | 953.52  | 51  | 3 | ENDVDAVHPGYGFLSER      | 50d | 28 |
| FBgn0027580 | 844.46  | 53  | 1 | FCELAVQTGMDFR          | 50d | 28 |
| FBgn0027580 | 573.29  | 35  | 1 | KAYREANLLLGDIK         | 50d | 28 |
| FBgn0027580 | 682.3   | 83  | 2 | SDFAQAVIDAGLR          | 50d | 28 |
| FBgn0027580 | 785.23  | 80  | 4 | SVVEYLQGSIGIPHGGFPEPLR | 50d | 28 |
| FBgn0027580 | 997.29  | 34  | 1 | VAAIEAGVPIVPGTDGPVTTK  | 50d | 28 |
| FBgn0027580 | 876.82  | 59  | 1 | VAEGMTLPELGYTQDK       | 50d | 28 |

|             |         |     |   |                        |     |    |
|-------------|---------|-----|---|------------------------|-----|----|
| FBgn0027580 | 1083.39 | 68  | 3 | VFDSLNYLPNLILGMEAAGK   | 50d | 28 |
| FBgn0027580 | 645.8   | 50  | 5 | VGEEFDVPLER            | 50d | 28 |
| FBgn0027580 | 715.63  | 71  | 2 | VISHASDLQSSASK         | 50d | 28 |
| FBgn0027580 | 881.74  | 59  | 3 | VTTEDPANDFQPNTGR       | 50d | 28 |
| FBgn0027580 | 665.45  | 51  | 1 | YYTNLADELVK            | 50d | 28 |
| FBgn0027580 | 644.74  | 52  | 1 | DMAGLLKPESAR           | 52d | 28 |
| FBgn0027580 | 1101.68 | 44  | 1 | DVMSAALYPQVTNDFLNFR    | 52d | 28 |
| FBgn0027580 | 600.12  | 63  | 5 | EANLLLGDIK             | 52d | 28 |
| FBgn0027580 | 601.23  | 54  | 3 | FIGPSPEVVQK            | 52d | 28 |
| FBgn0027580 | 1160.76 | 73  | 2 | FLHGVLDTYFIDEHPQLFK    | 52d | 28 |
| FBgn0027580 | 1255.13 | 89  | 2 | LQVEHTVTEEITGIDLVSQIR  | 52d | 28 |
| FBgn0027580 | 681.92  | 83  | 1 | SDFQAVIDAGLR           | 52d | 28 |
| FBgn0027580 | 771.93  | 56  | 2 | SEVGAPMPGTVIDIR        | 52d | 28 |
| FBgn0027580 | 1176.92 | 100 | 4 | SVVEYLQGSIGIPHGGFPEPLR | 52d | 28 |
| FBgn0027580 | 997.2   | 49  | 1 | VAAIEAGVPIVPGTDGPVTTK  | 52d | 28 |
| FBgn0027580 | 722.86  | 51  | 1 | VFDSLNYLPNLILGMEAAGK   | 52d | 28 |
| FBgn0027580 | 645.96  | 46  | 3 | VGEEFDVPLER            | 52d | 28 |
| FBgn0027580 | 715.8   | 62  | 3 | VISHASDLQSSASK         | 52d | 28 |
| FBgn0027580 | 881.69  | 72  | 3 | VTTEDPANDFQPNTGR       | 52d | 28 |
| FBgn0027580 | 665.17  | 59  | 3 | YYTNLADELVK            | 52d | 28 |
| FBgn0027580 | 644.74  | 54  | 2 | DMAGLLKPESAR           | 56d | 28 |
| FBgn0027580 | 600.6   | 75  | 6 | EANLLLGDIK             | 56d | 28 |
| FBgn0027580 | 620.15  | 43  | 3 | ELLMDTTFR              | 56d | 28 |
| FBgn0027580 | 953.59  | 46  | 1 | ENDVDAVHPGYGFLSER      | 56d | 28 |
| FBgn0027580 | 844.62  | 86  | 1 | FCELAVQTGMDFR          | 56d | 28 |
| FBgn0027580 | 1160.43 | 60  | 1 | FLHGVLDTYFIDEHPQLFK    | 56d | 28 |
| FBgn0027580 | 682.57  | 86  | 3 | SDFQAVIDAGLR           | 56d | 28 |
| FBgn0027580 | 771.79  | 56  | 2 | SEVGAPMPGTVIDIR        | 56d | 28 |
| FBgn0027580 | 357.09  | 36  | 1 | SHDLLK                 | 56d | 28 |
| FBgn0027580 | 1177.02 | 88  | 3 | SVVEYLQGSIGIPHGGFPEPLR | 56d | 28 |
| FBgn0027580 | 997.29  | 42  | 1 | VAAIEAGVPIVPGTDGPVTTK  | 56d | 28 |
| FBgn0027580 | 877.05  | 52  | 1 | VAEGMTLPELGYTQDK       | 56d | 28 |

|             |         |    |   |                      |      |    |
|-------------|---------|----|---|----------------------|------|----|
| FBgn0027580 | 722.58  | 52 | 1 | VFDSLNYLPNLILGMEAAGK | 56d  | 28 |
| FBgn0027580 | 881.75  | 56 | 2 | VTTEDPANDFQPNTGR     | 56d  | 28 |
| FBgn0027580 | 665.43  | 66 | 3 | YYTNLADELVK          | 56d  | 28 |
| FBgn0027584 | 710.38  | 45 | 1 | GLNWPLYNAQDK         | 142d | 18 |
| FBgn0027584 | 892.04  | 42 | 1 | YQIWEDLFPLSSFH       | 56d  | 28 |
| FBgn0027586 | 741.03  | 54 | 1 | NVVIHGLSEGIVDK       | 2d   | 18 |
| FBgn0027586 | 740.8   | 75 | 3 | NVVIHGLSEGIVDK       | 2d   | 28 |
| FBgn0027586 | 740.94  | 61 | 2 | NVVIHGLSEGIVDK       | 12d  | 28 |
| FBgn0027586 | 741.09  | 58 | 1 | NVVIHGLSEGIVDK       | 36d  | 28 |
| FBgn0027586 | 959.58  | 51 | 2 | STNDFFAALPFDMLVTK    | 56d  | 28 |
| FBgn0027590 | 840.19  | 53 | 2 | AIGLDLELRPINLLK      | 2d   | 18 |
| FBgn0027590 | 1063.15 | 88 | 2 | LAELPYYQEVNGDGADELK  | 2d   | 18 |
| FBgn0027590 | 586.08  | 39 | 1 | GEHLTPEFLK           | 22d  | 18 |
| FBgn0027590 | 1063.06 | 65 | 2 | LAELPYYQEVNGDGADELK  | 22d  | 18 |
| FBgn0027590 | 1062.94 | 68 | 2 | LAELPYYQEVNGDGADELK  | 42d  | 18 |
| FBgn0027590 | 839.88  | 54 | 2 | AIGLDLELRPINLLK      | 62d  | 18 |
| FBgn0027590 | 586.37  | 39 | 1 | GEHLTPEFLK           | 62d  | 18 |
| FBgn0027590 | 1063.26 | 64 | 1 | LAELPYYQEVNGDGADELK  | 62d  | 18 |
| FBgn0027590 | 839.48  | 45 | 2 | AIGLDLELRPINLLK      | 82d  | 18 |
| FBgn0027590 | 586.56  | 49 | 2 | GEHLTPEFLK           | 82d  | 18 |
| FBgn0027590 | 840.01  | 43 | 1 | AIGLDLELRPINLLK      | 102d | 18 |
| FBgn0027590 | 1063.08 | 68 | 3 | LAELPYYQEVNGDGADELK  | 112d | 18 |
| FBgn0027590 | 1062.9  | 68 | 2 | LAELPYYQEVNGDGADELK  | 122d | 18 |
| FBgn0027590 | 1062.98 | 59 | 1 | LAELPYYQEVNGDGADELK  | 132d | 18 |
| FBgn0027590 | 1063.02 | 50 | 2 | LAELPYYQEVNGDGADELK  | 142d | 18 |
| FBgn0027590 | 1062.88 | 66 | 2 | LAELPYYQEVNGDGADELK  | 2d   | 28 |
| FBgn0027590 | 839.82  | 44 | 1 | AIGLDLELRPINLLK      | 12d  | 28 |
| FBgn0027590 | 1063.02 | 82 | 3 | LAELPYYQEVNGDGADELK  | 12d  | 28 |
| FBgn0027590 | 586.43  | 46 | 1 | GEHLTPEFLK           | 22d  | 28 |
| FBgn0027590 | 1062.93 | 68 | 1 | LAELPYYQEVNGDGADELK  | 22d  | 28 |
| FBgn0027590 | 1062.95 | 68 | 2 | LAELPYYQEVNGDGADELK  | 32d  | 28 |
| FBgn0027590 | 586.48  | 49 | 3 | GEHLTPEFLK           | 36d  | 28 |



|             |         |    |   |                                      |      |    |
|-------------|---------|----|---|--------------------------------------|------|----|
| FBgn0027590 | 1062.95 | 69 | 3 | LAELPYYQEVNGDGADELK                  | 36d  | 28 |
| FBgn0027590 | 839.99  | 47 | 2 | AIGLDLELRPINLLK                      | 42d  | 28 |
| FBgn0027590 | 586.12  | 46 | 2 | GEHLTPEFLK                           | 42d  | 28 |
| FBgn0027590 | 1063.13 | 59 | 2 | LAELPYYQEVNGDGADELK                  | 42d  | 28 |
| FBgn0027590 | 586.45  | 47 | 2 | GEHLTPEFLK                           | 46d  | 28 |
| FBgn0027590 | 1062.98 | 88 | 3 | LAELPYYQEVNGDGADELK                  | 46d  | 28 |
| FBgn0027590 | 1062.98 | 47 | 1 | LAELPYYQEVNGDGADELK                  | 50d  | 28 |
| FBgn0027590 | 1063.17 | 67 | 1 | LAELPYYQEVNGDGADELK                  | 52d  | 28 |
| FBgn0027590 | 1062.94 | 91 | 2 | LAELPYYQEVNGDGADELK                  | 56d  | 28 |
| FBgn0027604 | 1622.14 | 35 | 1 | IPVENETSSAPVEAPFDTVSIPASVDSVEQK      | 2d   | 18 |
| FBgn0027604 | 1622.16 | 39 | 1 | IPVENETSSAPVEAPFDTVSIPASVDSVEQK      | 12d  | 28 |
| FBgn0027604 | 1622.22 | 39 | 1 | IPVENETSSAPVEAPFDTVSIPASVDSVEQK      | 52d  | 28 |
| FBgn0027608 | 765.55  | 46 | 1 | GQGLLTSVVM PGVDR                     | 42d  | 18 |
| FBgn0027608 | 621.32  | 82 | 7 | HGAGSSSAAAPEK                        | 112d | 18 |
| FBgn0027608 | 507.68  | 46 | 1 | AGDVLADAPGK                          | 2d   | 28 |
| FBgn0027608 | 765.3   | 54 | 1 | GQGLLTSVVM PGVDR                     | 36d  | 28 |
| FBgn0027608 | 621.15  | 86 | 3 | HGAGSSSAAAPEK                        | 42d  | 28 |
| FBgn0027608 | 765.49  | 43 | 1 | GQGLLTSVVM PGVDR                     | 46d  | 28 |
| FBgn0027608 | 765.37  | 43 | 1 | GQGLLTSVVM PGVDR                     | 56d  | 28 |
| FBgn0027619 | 867.16  | 49 | 1 | ESEHFPPQFVEDLVR                      | 42d  | 18 |
| FBgn0027621 | 1189.9  | 44 | 1 | IPGDVSEPGLDGLSGELVAPDGVGK            | 2d   | 18 |
| FBgn0027621 | 1190.21 | 81 | 1 | IPGDVSEPGLDGLSGELVAPDGVGK            | 62d  | 18 |
| FBgn0027621 | 1190.29 | 52 | 1 | IPGDVSEPGLDGLSGELVAPDGVGK            | 82d  | 18 |
| FBgn0027621 | 1190.34 | 44 | 1 | IPGDVSEPGLDGLSGELVAPDGVGK            | 122d | 18 |
| FBgn0027621 | 1190.33 | 78 | 1 | IPGDVSEPGLDGLSGELVAPDGVGK            | 142d | 18 |
| FBgn0027621 | 1190.1  | 52 | 1 | IPGDVSEPGLDGLSGELVAPDGVGK            | 2d   | 28 |
| FBgn0027621 | 1190.08 | 70 | 3 | IPGDVSEPGLDGLSGELVAPDGVGK            | 12d  | 28 |
| FBgn0027621 | 793.71  | 43 | 1 | IPGDVSEPGLDGLSGELVAPDGVGK            | 56d  | 28 |
| FBgn0027654 | 1036.53 | 52 | 1 | MLPETGGAAAQGP GTGAGCSSGGLTAASP NPAHR | 2d   | 18 |
| FBgn0027654 | 1036.61 | 75 | 2 | MLPETGGAAAQGP GTGAGCSSGGLTAASP NPAHR | 22d  | 18 |
| FBgn0027654 | 1036.6  | 45 | 1 | MLPETGGAAAQGP GTGAGCSSGGLTAASP NPAHR | 122d | 18 |
| FBgn0027654 | 1036.52 | 77 | 2 | MLPETGGAAAQGP GTGAGCSSGGLTAASP NPAHR | 2d   | 28 |

|             |         |     |   |                      |      |    |
|-------------|---------|-----|---|----------------------|------|----|
| FBgn0027654 | 592.7   | 49  | 1 | VLALQYHPDK           | 2d   | 28 |
| FBgn0027654 | 753.2   | 57  | 1 | KGEWGGENTDVANK       | 46d  | 28 |
| FBgn0027657 | 651.05  | 35  | 1 | DVPLEELSGNAR         | 82d  | 18 |
| FBgn0027657 | 758.95  | 35  | 1 | IIRVFDESIQVLGQDGDLEK | 82d  | 18 |
| FBgn0027657 | 758.93  | 37  | 1 | IIRVFDESIQVLGQDGDLEK | 102d | 18 |
| FBgn0027657 | 758.7   | 34  | 1 | IIRVFDESIQVLGQDGDLEK | 2d   | 28 |
| FBgn0027657 | 947.12  | 60  | 1 | VFDESIQVLGQDGDLEK    | 32d  | 28 |
| FBgn0027657 | 947.1   | 49  | 1 | VFDESIQVLGQDGDLEK    | 42d  | 28 |
| FBgn0027657 | 947.05  | 43  | 1 | VFDESIQVLGQDGDLEK    | 56d  | 28 |
| FBgn0027779 | 1023.45 | 114 | 3 | RFDDEDITADVEYLSEK    | 2d   | 18 |
| FBgn0027779 | 552.36  | 49  | 1 | VDLFHDTAGK           | 2d   | 18 |
| FBgn0027779 | 1023.12 | 77  | 1 | RFDDEDITADVEYLSEK    | 22d  | 18 |
| FBgn0027779 | 882.15  | 73  | 1 | FSVIPILADILSDCAK     | 42d  | 18 |
| FBgn0027779 | 612.77  | 37  | 1 | TLLNLVSHLSK          | 42d  | 18 |
| FBgn0027779 | 1101.35 | 93  | 1 | LQNSVQDLSSFDEYATEVR  | 62d  | 18 |
| FBgn0027779 | 1023.28 | 107 | 1 | RFDDEDITADVEYLSEK    | 62d  | 18 |
| FBgn0027779 | 881.93  | 72  | 2 | FSVIPILADILSDCAK     | 82d  | 18 |
| FBgn0027779 | 1023.43 | 60  | 1 | RFDDEDITADVEYLSEK    | 82d  | 18 |
| FBgn0027779 | 881.84  | 39  | 1 | FSVIPILADILSDCAK     | 102d | 18 |
| FBgn0027779 | 1023.65 | 61  | 1 | RFDDEDITADVEYLSEK    | 102d | 18 |
| FBgn0027779 | 1101.67 | 68  | 1 | LQNSVQDLSSFDEYATEVR  | 112d | 18 |
| FBgn0027779 | 1101.63 | 45  | 1 | LQNSVQDLSSFDEYATEVR  | 132d | 18 |
| FBgn0027779 | 881.83  | 37  | 1 | FSVIPILADILSDCAK     | 142d | 18 |
| FBgn0027779 | 882.22  | 86  | 2 | FSVIPILADILSDCAK     | 2d   | 28 |
| FBgn0027779 | 1023.68 | 103 | 2 | RFDDEDITADVEYLSEK    | 2d   | 28 |
| FBgn0027779 | 882.16  | 45  | 1 | FSVIPILADILSDCAK     | 12d  | 28 |
| FBgn0027779 | 1101.51 | 91  | 1 | LQNSVQDLSSFDEYATEVR  | 12d  | 28 |
| FBgn0027779 | 1023.37 | 135 | 3 | RFDDEDITADVEYLSEK    | 12d  | 28 |
| FBgn0027779 | 1022.92 | 47  | 1 | RFDDEDITADVEYLSEK    | 32d  | 28 |
| FBgn0027779 | 1101.5  | 99  | 1 | LQNSVQDLSSFDEYATEVR  | 36d  | 28 |
| FBgn0027779 | 793.61  | 67  | 2 | IAATSVLQQQAADIR      | 42d  | 28 |
| FBgn0027779 | 1101.41 | 88  | 1 | LQNSVQDLSSFDEYATEVR  | 42d  | 28 |

|             |         |     |   |                              |      |    |
|-------------|---------|-----|---|------------------------------|------|----|
| FBgn0027779 | 1023.64 | 82  | 2 | RFDDEDITADVEYLSEK            | 42d  | 28 |
| FBgn0027779 | 881.68  | 58  | 1 | FSVIPILADILSDCAK             | 46d  | 28 |
| FBgn0027779 | 1101.44 | 134 | 1 | LQNSVQDLSSFDEYATEVR          | 50d  | 28 |
| FBgn0027779 | 1023.5  | 94  | 1 | RFDDEDITADVEYLSEK            | 52d  | 28 |
| FBgn0027779 | 882.14  | 37  | 1 | FSVIPILADILSDCAK             | 56d  | 28 |
| FBgn0027779 | 1101.24 | 95  | 3 | LQNSVQDLSSFDEYATEVR          | 56d  | 28 |
| FBgn0027794 | 779.96  | 34  | 1 | LQLFKGLWAQLIK                | 102d | 18 |
| FBgn0027794 | 780.02  | 36  | 1 | LQLFKGLWAQLIK                | 12d  | 28 |
| FBgn0027794 | 779.79  | 43  | 1 | LQLFKGLWAQLIK                | 42d  | 28 |
| FBgn0027794 | 779.9   | 36  | 1 | LQLFKGLWAQLIK                | 50d  | 28 |
| FBgn0027794 | 780.14  | 35  | 1 | LQLFKGLWAQLIK                | 52d  | 28 |
| FBgn0027835 | 1026.24 | 41  | 1 | INIPSQSESEFITIAGTK           | 2d   | 18 |
| FBgn0027835 | 1083.28 | 53  | 1 | DATEPVEGLTNGGSGENGENEGEQEVEK | 2d   | 28 |
| FBgn0027844 | 1067.08 | 76  | 1 | VDVNGADSELTTGGPLGDQIFK       | 22d  | 18 |
| FBgn0027844 | 1066.96 | 81  | 3 | VDVNGADSELTTGGPLGDQIFK       | 42d  | 18 |
| FBgn0027844 | 1067.03 | 63  | 2 | VDVNGADSELTTGGPLGDQIFK       | 62d  | 18 |
| FBgn0027844 | 967.53  | 74  | 1 | SFGEAAAAPDGLAVLGVFLK         | 82d  | 18 |
| FBgn0027844 | 1067.15 | 39  | 1 | VDVNGADSELTTGGPLGDQIFK       | 82d  | 18 |
| FBgn0027844 | 967.62  | 46  | 1 | SFGEAAAAPDGLAVLGVFLK         | 102d | 18 |
| FBgn0027844 | 967.5   | 50  | 1 | SFGEAAAAPDGLAVLGVFLK         | 142d | 18 |
| FBgn0027844 | 1066.96 | 93  | 2 | VDVNGADSELTTGGPLGDQIFK       | 2d   | 28 |
| FBgn0027844 | 967.61  | 59  | 1 | SFGEAAAAPDGLAVLGVFLK         | 12d  | 28 |
| FBgn0027844 | 1067.08 | 61  | 1 | VDVNGADSELTTGGPLGDQIFK       | 12d  | 28 |
| FBgn0027844 | 1067.06 | 68  | 1 | VDVNGADSELTTGGPLGDQIFK       | 22d  | 28 |
| FBgn0027844 | 967.62  | 58  | 1 | SFGEAAAAPDGLAVLGVFLK         | 46d  | 28 |
| FBgn0027844 | 1066.99 | 71  | 1 | VDVNGADSELTTGGPLGDQIFK       | 50d  | 28 |
| FBgn0027844 | 1066.96 | 83  | 1 | VDVNGADSELTTGGPLGDQIFK       | 56d  | 28 |
| FBgn0027932 | 865.92  | 55  | 3 | EAAAGEDITPLADESIK            | 2d   | 18 |
| FBgn0027932 | 664.65  | 74  | 2 | TDAPAVNGDAATPK               | 2d   | 18 |
| FBgn0027932 | 865.68  | 51  | 3 | EAAAGEDITPLADESIK            | 2d   | 28 |
| FBgn0027932 | 724.11  | 91  | 2 | SAAVAEGGDAVAETAK             | 2d   | 28 |
| FBgn0027932 | 664.75  | 55  | 3 | TDAPAVNGDAATPK               | 2d   | 28 |

|             |         |    |   |                        |      |    |
|-------------|---------|----|---|------------------------|------|----|
| FBgn0027945 | 735.95  | 46 | 2 | ELEALMTEDQYK           | 12d  | 28 |
| FBgn0027945 | 735.88  | 60 | 1 | ELEALMTEDQYK           | 32d  | 28 |
| FBgn0027945 | 735.67  | 61 | 1 | ELEALMTEDQYK           | 36d  | 28 |
| FBgn0027945 | 735.83  | 52 | 1 | ELEALMTEDQYK           | 42d  | 28 |
| FBgn0027945 | 735.98  | 70 | 2 | ELEALMTEDQYK           | 46d  | 28 |
| FBgn0027945 | 735.73  | 75 | 1 | ELEALMTEDQYK           | 50d  | 28 |
| FBgn0027945 | 1013.84 | 72 | 1 | NAEVEDTPALVNSSCYEK     | 50d  | 28 |
| FBgn0028325 | 766.31  | 73 | 2 | GTIAYDIDHIQER          | 2d   | 18 |
| FBgn0028325 | 1238.06 | 47 | 1 | SDAELGVSHLWTDVYSNNLEPK | 2d   | 18 |
| FBgn0028325 | 602.82  | 54 | 1 | YYTQMQTIR              | 2d   | 18 |
| FBgn0028325 | 766.42  | 71 | 1 | GTIAYDIDHIQER          | 22d  | 18 |
| FBgn0028325 | 530.27  | 55 | 1 | LDEGPATEVK             | 42d  | 18 |
| FBgn0028325 | 766.11  | 74 | 1 | GTIAYDIDHIQER          | 62d  | 18 |
| FBgn0028325 | 1238.15 | 65 | 1 | SDAELGVSHLWTDVYSNNLEPK | 62d  | 18 |
| FBgn0028325 | 766.48  | 64 | 1 | GTIAYDIDHIQER          | 82d  | 18 |
| FBgn0028325 | 1238.26 | 50 | 2 | SDAELGVSHLWTDVYSNNLEPK | 102d | 18 |
| FBgn0028325 | 1238.04 | 60 | 3 | SDAELGVSHLWTDVYSNNLEPK | 112d | 18 |
| FBgn0028325 | 1238.1  | 60 | 3 | SDAELGVSHLWTDVYSNNLEPK | 122d | 18 |
| FBgn0028325 | 1238.2  | 61 | 3 | SDAELGVSHLWTDVYSNNLEPK | 142d | 18 |
| FBgn0028325 | 766.52  | 75 | 2 | GTIAYDIDHIQER          | 2d   | 28 |
| FBgn0028325 | 530.37  | 59 | 1 | LDEGPATEVK             | 2d   | 28 |
| FBgn0028325 | 1238.26 | 61 | 2 | SDAELGVSHLWTDVYSNNLEPK | 2d   | 28 |
| FBgn0028325 | 602.9   | 37 | 1 | YYTQMQTIR              | 2d   | 28 |
| FBgn0028325 | 943.14  | 49 | 1 | GDALPGIWVDGMDVLAVR     | 12d  | 28 |
| FBgn0028325 | 766.56  | 96 | 3 | GTIAYDIDHIQER          | 12d  | 28 |
| FBgn0028325 | 1237.78 | 61 | 3 | SDAELGVSHLWTDVYSNNLEPK | 12d  | 28 |
| FBgn0028325 | 766.24  | 72 | 3 | GTIAYDIDHIQER          | 22d  | 28 |
| FBgn0028325 | 602.88  | 49 | 2 | YYTQMQTIR              | 32d  | 28 |
| FBgn0028325 | 511.19  | 64 | 3 | GTIAYDIDHIQER          | 36d  | 28 |
| FBgn0028325 | 1238.07 | 55 | 1 | SDAELGVSHLWTDVYSNNLEPK | 42d  | 28 |
| FBgn0028325 | 766.51  | 71 | 2 | GTIAYDIDHIQER          | 46d  | 28 |
| FBgn0028325 | 602.77  | 54 | 1 | YYTQMQTIR              | 46d  | 28 |

|             |         |     |   |                             |      |    |
|-------------|---------|-----|---|-----------------------------|------|----|
| FBgn0028325 | 766.44  | 69  | 2 | GTIAYDIDHIQER               | 50d  | 28 |
| FBgn0028325 | 1237.88 | 58  | 1 | SDAELGVSHLWTDVYSNNLEPK      | 50d  | 28 |
| FBgn0028325 | 602.94  | 40  | 1 | YYTQMQTIR                   | 50d  | 28 |
| FBgn0028325 | 766.63  | 72  | 1 | GTIAYDIDHIQER               | 52d  | 28 |
| FBgn0028325 | 766.02  | 75  | 1 | GTIAYDIDHIQER               | 56d  | 28 |
| FBgn0028336 | 695.7   | 58  | 3 | SQINFPIGGATER               | 22d  | 18 |
| FBgn0028336 | 695.77  | 41  | 1 | SQINFPIGGATER               | 82d  | 18 |
| FBgn0028336 | 695.96  | 48  | 1 | SQINFPIGGATER               | 122d | 18 |
| FBgn0028336 | 695.55  | 37  | 1 | SQINFPIGGATER               | 132d | 18 |
| FBgn0028336 | 695.94  | 43  | 1 | SQINFPIGGATER               | 142d | 18 |
| FBgn0028336 | 1069.67 | 43  | 1 | EEAINLGYLTEQQFNDWVRPEQMLGPK | 2d   | 28 |
| FBgn0028336 | 695.63  | 60  | 2 | SQINFPIGGATER               | 2d   | 28 |
| FBgn0028336 | 1069.64 | 62  | 1 | EEAINLGYLTEQQFNDWVRPEQMLGPK | 32d  | 28 |
| FBgn0028336 | 695.74  | 64  | 3 | SQINFPIGGATER               | 32d  | 28 |
| FBgn0028336 | 1069.21 | 68  | 2 | EEAINLGYLTEQQFNDWVRPEQMLGPK | 36d  | 28 |
| FBgn0028336 | 695.74  | 71  | 3 | SQINFPIGGATER               | 36d  | 28 |
| FBgn0028336 | 695.69  | 57  | 2 | SQINFPIGGATER               | 42d  | 28 |
| FBgn0028336 | 1069.67 | 80  | 1 | EEAINLGYLTEQQFNDWVRPEQMLGPK | 46d  | 28 |
| FBgn0028336 | 695.83  | 60  | 2 | SQINFPIGGATER               | 46d  | 28 |
| FBgn0028336 | 1069.26 | 50  | 1 | EEAINLGYLTEQQFNDWVRPEQMLGPK | 50d  | 28 |
| FBgn0028336 | 695.88  | 67  | 2 | SQINFPIGGATER               | 50d  | 28 |
| FBgn0028336 | 1014.65 | 49  | 1 | DAMVEVHGVLNTIAVSLMK         | 52d  | 28 |
| FBgn0028336 | 695.89  | 61  | 2 | SQINFPIGGATER               | 52d  | 28 |
| FBgn0028336 | 1069.56 | 37  | 1 | EEAINLGYLTEQQFNDWVRPEQMLGPK | 56d  | 28 |
| FBgn0028336 | 753.68  | 43  | 1 | IMNESLMLVTALNPHIGYDK        | 56d  | 28 |
| FBgn0028342 | 521.63  | 57  | 3 | TFYDAAVVR                   | 2d   | 18 |
| FBgn0028342 | 742.29  | 96  | 3 | AQAIAVEVAEALVK              | 22d  | 18 |
| FBgn0028342 | 521.75  | 44  | 2 | TFYDAAVVR                   | 22d  | 18 |
| FBgn0028342 | 650.17  | 59  | 2 | YQSQLSSAGDDK                | 22d  | 18 |
| FBgn0028342 | 742.62  | 100 | 6 | AQAIAVEVAEALVK              | 42d  | 18 |
| FBgn0028342 | 834.06  | 37  | 1 | QIDVPSFSGSFGILAK            | 42d  | 18 |
| FBgn0028342 | 521.94  | 41  | 1 | TFYDAAVVR                   | 42d  | 18 |

|             |         |     |   |                                     |      |    |
|-------------|---------|-----|---|-------------------------------------|------|----|
| FBgn0028342 | 650.31  | 77  | 2 | YQSQLSSAGDDK                        | 42d  | 18 |
| FBgn0028342 | 742.2   | 99  | 3 | AQAAIAVEVAEALVK                     | 62d  | 18 |
| FBgn0028342 | 1260.71 | 55  | 1 | FFVSSGSVTVNEDSSVQVLAEEAHNIEDIDANEAR | 62d  | 18 |
| FBgn0028342 | 521.85  | 55  | 1 | TFYDAAVVR                           | 62d  | 18 |
| FBgn0028342 | 650.13  | 58  | 3 | YQSQLSSAGDDK                        | 62d  | 18 |
| FBgn0028342 | 741.27  | 106 | 4 | AQAAIAVEVAEALVK                     | 82d  | 18 |
| FBgn0028342 | 1260.62 | 77  | 2 | FFVSSGSVTVNEDSSVQVLAEEAHNIEDIDANEAR | 82d  | 18 |
| FBgn0028342 | 521.93  | 54  | 2 | TFYDAAVVR                           | 82d  | 18 |
| FBgn0028342 | 650.27  | 73  | 1 | YQSQLSSAGDDK                        | 82d  | 18 |
| FBgn0028342 | 742.67  | 113 | 1 | AQAAIAVEVAEALVK                     | 102d | 18 |
| FBgn0028342 | 1260.68 | 37  | 1 | FFVSSGSVTVNEDSSVQVLAEEAHNIEDIDANEAR | 102d | 18 |
| FBgn0028342 | 649.58  | 35  | 1 | YQSQLSSAGDDK                        | 102d | 18 |
| FBgn0028342 | 650.49  | 62  | 1 | YQSQLSSAGDDK                        | 122d | 18 |
| FBgn0028342 | 834.11  | 34  | 1 | QIDVPSFSGSFGILAK                    | 142d | 18 |
| FBgn0028342 | 650.47  | 82  | 1 | YQSQLSSAGDDK                        | 142d | 18 |
| FBgn0028342 | 521.65  | 55  | 3 | TFYDAAVVR                           | 2d   | 28 |
| FBgn0028342 | 650.33  | 64  | 3 | YQSQLSSAGDDK                        | 2d   | 28 |
| FBgn0028342 | 742.56  | 83  | 1 | AQAAIAVEVAEALVK                     | 12d  | 28 |
| FBgn0028342 | 1260.69 | 64  | 3 | FFVSSGSVTVNEDSSVQVLAEEAHNIEDIDANEAR | 12d  | 28 |
| FBgn0028342 | 521.26  | 42  | 3 | TFYDAAVVR                           | 12d  | 28 |
| FBgn0028342 | 650.29  | 54  | 2 | YQSQLSSAGDDK                        | 12d  | 28 |
| FBgn0028342 | 521.62  | 55  | 1 | TFYDAAVVR                           | 22d  | 28 |
| FBgn0028342 | 650.21  | 71  | 1 | YQSQLSSAGDDK                        | 22d  | 28 |
| FBgn0028342 | 742.44  | 89  | 3 | AQAAIAVEVAEALVK                     | 32d  | 28 |
| FBgn0028342 | 650.3   | 55  | 1 | YQSQLSSAGDDK                        | 32d  | 28 |
| FBgn0028342 | 742.67  | 113 | 7 | AQAAIAVEVAEALVK                     | 36d  | 28 |
| FBgn0028342 | 1260.68 | 45  | 3 | FFVSSGSVTVNEDSSVQVLAEEAHNIEDIDANEAR | 36d  | 28 |
| FBgn0028342 | 834.1   | 39  | 2 | QIDVPSFSGSFGILAK                    | 36d  | 28 |
| FBgn0028342 | 521.9   | 36  | 1 | TFYDAAVVR                           | 36d  | 28 |
| FBgn0028342 | 650.12  | 69  | 2 | YQSQLSSAGDDK                        | 36d  | 28 |
| FBgn0028342 | 742.39  | 86  | 4 | AQAAIAVEVAEALVK                     | 42d  | 28 |
| FBgn0028342 | 1260.49 | 59  | 4 | FFVSSGSVTVNEDSSVQVLAEEAHNIEDIDANEAR | 42d  | 28 |

|             |         |     |   |                                     |     |    |
|-------------|---------|-----|---|-------------------------------------|-----|----|
| FBgn0028342 | 1100.48 | 58  | 1 | HVPTLAVLKPGVVQVVENDGK               | 42d | 28 |
| FBgn0028342 | 521.45  | 34  | 2 | TFYDAAVVR                           | 42d | 28 |
| FBgn0028342 | 650.14  | 70  | 3 | YQSQLSSAGDDK                        | 42d | 28 |
| FBgn0028342 | 742.4   | 95  | 5 | AQAIAVEVAEALVK                      | 46d | 28 |
| FBgn0028342 | 1260.71 | 71  | 3 | FFVSSGSVTVNEDSSVQVLAEEAHNIEDIDANEAR | 46d | 28 |
| FBgn0028342 | 521.68  | 63  | 3 | TFYDAAVVR                           | 46d | 28 |
| FBgn0028342 | 650.07  | 65  | 3 | YQSQLSSAGDDK                        | 46d | 28 |
| FBgn0028342 | 742.62  | 55  | 2 | AQAIAVEVAEALVK                      | 50d | 28 |
| FBgn0028342 | 1260.76 | 48  | 2 | FFVSSGSVTVNEDSSVQVLAEEAHNIEDIDANEAR | 50d | 28 |
| FBgn0028342 | 834     | 35  | 1 | QIDVPSFSGSFGILAK                    | 50d | 28 |
| FBgn0028342 | 521.43  | 38  | 3 | TFYDAAVVR                           | 50d | 28 |
| FBgn0028342 | 650.13  | 38  | 1 | YQSQLSSAGDDK                        | 50d | 28 |
| FBgn0028342 | 742.67  | 75  | 2 | AQAIAVEVAEALVK                      | 52d | 28 |
| FBgn0028342 | 1260.47 | 55  | 3 | FFVSSGSVTVNEDSSVQVLAEEAHNIEDIDANEAR | 52d | 28 |
| FBgn0028342 | 1100.47 | 35  | 1 | HVPTLAVLKPGVVQVVENDGK               | 52d | 28 |
| FBgn0028342 | 650.19  | 44  | 1 | YQSQLSSAGDDK                        | 52d | 28 |
| FBgn0028342 | 742.37  | 109 | 4 | AQAIAVEVAEALVK                      | 56d | 28 |
| FBgn0028342 | 1260.65 | 50  | 1 | FFVSSGSVTVNEDSSVQVLAEEAHNIEDIDANEAR | 56d | 28 |
| FBgn0028342 | 1100.6  | 44  | 1 | HVPTLAVLKPGVVQVVENDGK               | 56d | 28 |
| FBgn0028342 | 650.11  | 47  | 1 | YQSQLSSAGDDK                        | 56d | 28 |
| FBgn0028383 | 510.27  | 34  | 1 | RSLATQQLLQEK                        | 42d | 18 |
| FBgn0028388 | 1369.94 | 52  | 2 | GAAPAGGAPPPPPGGLPPPPMLDLSALK        | 2d  | 18 |
| FBgn0028388 | 1415.17 | 40  | 1 | SSEMNIILLPDDSGDYTELALPEQYK          | 2d  | 18 |
| FBgn0028388 | 1369.52 | 38  | 1 | GAAPAGGAPPPPPGGLPPPPMLDLSALK        | 2d  | 28 |
| FBgn0028388 | 669.11  | 66  | 2 | IGGDVAQHAELVK                       | 2d  | 28 |
| FBgn0028388 | 1415.15 | 40  | 2 | SSEMNIILLPDDSGDYTELALPEQYK          | 12d | 28 |
| FBgn0028396 | 1076.61 | 68  | 3 | FVNEHTDAIIIDGVPIQGGR                | 2d  | 18 |
| FBgn0028396 | 678.95  | 39  | 1 | GLATGFFEELGSK                       | 2d  | 18 |
| FBgn0028396 | 678.76  | 53  | 1 | GLATGFFEELGSK                       | 42d | 18 |
| FBgn0028396 | 733.53  | 47  | 1 | INSTQELLDIYR                        | 42d | 18 |
| FBgn0028396 | 1076.47 | 89  | 1 | FVNEHTDAIIIDGVPIQGGR                | 62d | 18 |
| FBgn0028396 | 1076.54 | 70  | 3 | FVNEHTDAIIIDGVPIQGGR                | 82d | 18 |

|             |         |     |   |                      |      |    |
|-------------|---------|-----|---|----------------------|------|----|
| FBgn0028396 | 1076.59 | 88  | 2 | FVNEHTDAIIIDGVPIQGGR | 102d | 18 |
| FBgn0028396 | 733.39  | 79  | 1 | INSTQELLDIYR         | 102d | 18 |
| FBgn0028396 | 718.07  | 82  | 3 | FVNEHTDAIIIDGVPIQGGR | 112d | 18 |
| FBgn0028396 | 679.06  | 69  | 3 | GLATGFFEELGSK        | 112d | 18 |
| FBgn0028396 | 733.23  | 97  | 1 | INSTQELLDIYR         | 112d | 18 |
| FBgn0028396 | 679.09  | 73  | 1 | GLATGFFEELGSK        | 122d | 18 |
| FBgn0028396 | 733.34  | 79  | 1 | INSTQELLDIYR         | 122d | 18 |
| FBgn0028396 | 1076.73 | 36  | 1 | FVNEHTDAIIIDGVPIQGGR | 132d | 18 |
| FBgn0028396 | 678.93  | 56  | 1 | GLATGFFEELGSK        | 132d | 18 |
| FBgn0028396 | 1076.74 | 71  | 2 | FVNEHTDAIIIDGVPIQGGR | 142d | 18 |
| FBgn0028396 | 679.07  | 53  | 2 | GLATGFFEELGSK        | 142d | 18 |
| FBgn0028396 | 603.54  | 48  | 2 | LYPSTPEER            | 142d | 18 |
| FBgn0028396 | 1076.79 | 70  | 2 | FVNEHTDAIIIDGVPIQGGR | 2d   | 28 |
| FBgn0028396 | 733.58  | 97  | 2 | INSTQELLDIYR         | 2d   | 28 |
| FBgn0028396 | 1076.61 | 91  | 3 | FVNEHTDAIIIDGVPIQGGR | 12d  | 28 |
| FBgn0028396 | 1076.61 | 53  | 2 | FVNEHTDAIIIDGVPIQGGR | 22d  | 28 |
| FBgn0028396 | 1076.5  | 68  | 1 | FVNEHTDAIIIDGVPIQGGR | 32d  | 28 |
| FBgn0028396 | 733.39  | 97  | 3 | INSTQELLDIYR         | 32d  | 28 |
| FBgn0028396 | 1076.41 | 65  | 2 | FVNEHTDAIIIDGVPIQGGR | 36d  | 28 |
| FBgn0028396 | 733.31  | 90  | 3 | INSTQELLDIYR         | 36d  | 28 |
| FBgn0028396 | 1076.27 | 75  | 2 | FVNEHTDAIIIDGVPIQGGR | 42d  | 28 |
| FBgn0028396 | 733.37  | 95  | 3 | INSTQELLDIYR         | 42d  | 28 |
| FBgn0028396 | 1076.52 | 62  | 2 | FVNEHTDAIIIDGVPIQGGR | 46d  | 28 |
| FBgn0028396 | 1076.6  | 83  | 3 | FVNEHTDAIIIDGVPIQGGR | 50d  | 28 |
| FBgn0028396 | 733.28  | 98  | 3 | INSTQELLDIYR         | 50d  | 28 |
| FBgn0028396 | 1076.61 | 86  | 3 | FVNEHTDAIIIDGVPIQGGR | 52d  | 28 |
| FBgn0028396 | 733.32  | 111 | 3 | INSTQELLDIYR         | 52d  | 28 |
| FBgn0028396 | 1076.6  | 94  | 3 | FVNEHTDAIIIDGVPIQGGR | 56d  | 28 |
| FBgn0028396 | 678.27  | 65  | 3 | GLATGFFEELGSK        | 56d  | 28 |
| FBgn0028396 | 733.26  | 89  | 2 | INSTQELLDIYR         | 56d  | 28 |
| FBgn0028396 | 679.01  | 40  | 1 | IVSPGVKGLATGFFEELGSK | 56d  | 28 |
| FBgn0028433 | 734.57  | 51  | 1 | SFIEENEKNDPLINAPDKK  | 122d | 18 |



|             |         |    |   |                               |      |    |
|-------------|---------|----|---|-------------------------------|------|----|
| FBgn0028433 | 733.97  | 54 | 1 | SFIEENEKNDPLINAPDKK           | 142d | 18 |
| FBgn0028433 | 613.53  | 54 | 2 | NDPLINAPDKK                   | 2d   | 28 |
| FBgn0028433 | 734.78  | 39 | 1 | SFIEENEKNDPLINAPDKK           | 42d  | 28 |
| FBgn0028433 | 613.09  | 50 | 3 | NDPLINAPDKK                   | 52d  | 28 |
| FBgn0028479 | 985.96  | 50 | 2 | DQTLASLRPTLDYSDFK             | 2d   | 18 |
| FBgn0028479 | 763.85  | 67 | 3 | GTRPVNNDALEIVK                | 2d   | 18 |
| FBgn0028479 | 1518.23 | 34 | 1 | LGIVDLLVDPLGPGQLQPAEQNTIEYLEK | 2d   | 18 |
| FBgn0028479 | 523.66  | 44 | 2 | MQLLEIITHPGTSK                | 2d   | 18 |
| FBgn0028479 | 785.02  | 50 | 1 | VNSLGSEVSDEFER                | 2d   | 18 |
| FBgn0028479 | 690.24  | 51 | 1 | VVGMHYFSPVDK                  | 2d   | 18 |
| FBgn0028479 | 986.17  | 40 | 1 | DQTLASLRPTLDYSDFK             | 22d  | 18 |
| FBgn0028479 | 762.74  | 65 | 2 | GTRPVNNDALEIVK                | 22d  | 18 |
| FBgn0028479 | 784.72  | 74 | 2 | VNSLGSEVSDEFER                | 22d  | 18 |
| FBgn0028479 | 986.1   | 36 | 1 | DQTLASLRPTLDYSDFK             | 42d  | 18 |
| FBgn0028479 | 924.31  | 65 | 3 | FGFPVGAATLADEVGIDVGSIAVDLAK   | 42d  | 18 |
| FBgn0028479 | 1055.71 | 50 | 1 | FSGGNLEVMNDLVLAGFLGR          | 42d  | 18 |
| FBgn0028479 | 763.85  | 64 | 2 | GTRPVNNDALEIVK                | 42d  | 18 |
| FBgn0028479 | 716.08  | 53 | 1 | IQSFVMDTDFVK                  | 42d  | 18 |
| FBgn0028479 | 918.85  | 36 | 2 | LGLPEVMLGLLPGGGGTVR           | 42d  | 18 |
| FBgn0028479 | 789.03  | 38 | 1 | LTSVPTALDMELTGK               | 42d  | 18 |
| FBgn0028479 | 795.86  | 81 | 3 | NADIIIIEAVFEDIK               | 42d  | 18 |
| FBgn0028479 | 500.28  | 52 | 2 | STNPAPVANK                    | 42d  | 18 |
| FBgn0028479 | 690.36  | 35 | 1 | VVGMHYFSPVDK                  | 42d  | 18 |
| FBgn0028479 | 986.04  | 45 | 1 | DQTLASLRPTLDYSDFK             | 62d  | 18 |
| FBgn0028479 | 1247.18 | 68 | 1 | ELEAVVPEHCVIATNTSAIPITK       | 62d  | 18 |
| FBgn0028479 | 924.31  | 35 | 1 | FGFPVGAATLADEVGIDVGSIAVDLAK   | 62d  | 18 |
| FBgn0028479 | 1518.21 | 57 | 2 | LGIVDLLVDPLGPGQLQPAEQNTIEYLEK | 62d  | 18 |
| FBgn0028479 | 796.17  | 82 | 2 | NADIIIIEAVFEDIK               | 62d  | 18 |
| FBgn0028479 | 637.8   | 53 | 1 | TAVQVANDLASGK                 | 62d  | 18 |
| FBgn0028479 | 784.89  | 74 | 2 | VNSLGSEVSDEFER                | 62d  | 18 |
| FBgn0028479 | 763.9   | 64 | 3 | GTRPVNNDALEIVK                | 82d  | 18 |
| FBgn0028479 | 784.75  | 70 | 1 | MQLLEIITHPGTSK                | 82d  | 18 |

|             |         |    |    |                                |      |    |
|-------------|---------|----|----|--------------------------------|------|----|
| FBgn0028479 | 796.08  | 87 | 2  | NADIIIIEAVFEDIK                | 82d  | 18 |
| FBgn0028479 | 637.79  | 57 | 1  | TAVQVANDLASGK                  | 82d  | 18 |
| FBgn0028479 | 784.69  | 77 | 3  | VNSLGSEVSDEFER                 | 82d  | 18 |
| FBgn0028479 | 1247.05 | 51 | 1  | ELEAVVPEHCVIATNTSAIPITK        | 102d | 18 |
| FBgn0028479 | 1518.05 | 63 | 2  | LGIVDLLVDPLGPGQLQPAEQNTIEYLEK  | 102d | 18 |
| FBgn0028479 | 1064.7  | 51 | 1  | RLGIVDLLVDPLGPGQLQPAEQNTIEYLEK | 102d | 18 |
| FBgn0028479 | 1247.19 | 68 | 2  | ELEAVVPEHCVIATNTSAIPITK        | 112d | 18 |
| FBgn0028479 | 508.93  | 67 | 11 | IAAGSSRPEK                     | 112d | 18 |
| FBgn0028479 | 784.78  | 65 | 1  | VNSLGSEVSDEFER                 | 112d | 18 |
| FBgn0028479 | 1247.38 | 35 | 1  | ELEAVVPEHCVIATNTSAIPITK        | 122d | 18 |
| FBgn0028479 | 523.53  | 42 | 1  | MQLLEIITHPGTSK                 | 122d | 18 |
| FBgn0028479 | 986.15  | 41 | 1  | DQTLASLRPTLDYSDFK              | 132d | 18 |
| FBgn0028479 | 1012.72 | 41 | 1  | LGIVDLLVDPLGPGQLQPAEQNTIEYLEK  | 132d | 18 |
| FBgn0028479 | 1247.33 | 54 | 1  | ELEAVVPEHCVIATNTSAIPITK        | 142d | 18 |
| FBgn0028479 | 1012.7  | 38 | 1  | LGIVDLLVDPLGPGQLQPAEQNTIEYLEK  | 142d | 18 |
| FBgn0028479 | 784.92  | 42 | 1  | VNSLGSEVSDEFER                 | 142d | 18 |
| FBgn0028479 | 986.05  | 54 | 3  | DQTLASLRPTLDYSDFK              | 2d   | 28 |
| FBgn0028479 | 763.74  | 59 | 2  | GTRPVNNDALIVK                  | 2d   | 28 |
| FBgn0028479 | 918.89  | 59 | 2  | LGLPEVMLGLLPGGGGTVR            | 2d   | 28 |
| FBgn0028479 | 500.17  | 38 | 1  | STNPAPVANK                     | 2d   | 28 |
| FBgn0028479 | 637.72  | 62 | 2  | TAVQVANDLASGK                  | 2d   | 28 |
| FBgn0028479 | 986.1   | 52 | 3  | DQTLASLRPTLDYSDFK              | 12d  | 28 |
| FBgn0028479 | 763.99  | 73 | 3  | GTRPVNNDALIVK                  | 12d  | 28 |
| FBgn0028479 | 1518.38 | 49 | 2  | LGIVDLLVDPLGPGQLQPAEQNTIEYLEK  | 12d  | 28 |
| FBgn0028479 | 919.21  | 44 | 1  | LGLPEVMLGLLPGGGGTVR            | 12d  | 28 |
| FBgn0028479 | 523.65  | 62 | 2  | MQLLEIITHPGTSK                 | 12d  | 28 |
| FBgn0028479 | 796.03  | 61 | 1  | NADIIIIEAVFEDIK                | 12d  | 28 |
| FBgn0028479 | 784.86  | 77 | 3  | VNSLGSEVSDEFER                 | 12d  | 28 |
| FBgn0028479 | 986.17  | 63 | 1  | DQTLASLRPTLDYSDFK              | 22d  | 28 |
| FBgn0028479 | 690.3   | 38 | 1  | VVGMHYFSPVDK                   | 22d  | 28 |
| FBgn0028479 | 986.06  | 42 | 2  | DQTLASLRPTLDYSDFK              | 32d  | 28 |
| FBgn0028479 | 923.81  | 47 | 2  | FGFPVGAATLADEVGIDVGSIAVDLAK    | 32d  | 28 |

|             |        |    |   |                               |     |    |
|-------------|--------|----|---|-------------------------------|-----|----|
| FBgn0028479 | 919.13 | 73 | 1 | LGLPEVMLGLLPGGGGTVR           | 32d | 28 |
| FBgn0028479 | 789.06 | 44 | 2 | LTSVPTALDMELT GK              | 32d | 28 |
| FBgn0028479 | 784.76 | 81 | 3 | MQLEIITHPGTSK                 | 32d | 28 |
| FBgn0028479 | 796.02 | 51 | 1 | NADIIIIEAVFEDIK               | 32d | 28 |
| FBgn0028479 | 637.69 | 47 | 1 | TAVQVANDLASGK                 | 32d | 28 |
| FBgn0028479 | 785.03 | 74 | 3 | VNSLGSEVSDEFER                | 32d | 28 |
| FBgn0028479 | 986    | 48 | 2 | DQTLASLRPTLDYSDFK             | 36d | 28 |
| FBgn0028479 | 924.2  | 64 | 2 | FGFPVGAATLADEVGIDVGSHIAVDLAK  | 36d | 28 |
| FBgn0028479 | 763.62 | 52 | 3 | GTRPVNNDAL EIVK               | 36d | 28 |
| FBgn0028479 | 918.82 | 56 | 1 | LGLPEVMLGLLPGGGGTVR           | 36d | 28 |
| FBgn0028479 | 788.86 | 45 | 3 | LTSVPTALDMELT GK              | 36d | 28 |
| FBgn0028479 | 784.89 | 85 | 2 | MQLEIITHPGTSK                 | 36d | 28 |
| FBgn0028479 | 796.17 | 74 | 2 | NADIIIIEAVFEDIK               | 36d | 28 |
| FBgn0028479 | 637.59 | 58 | 2 | TAVQVANDLASGK                 | 36d | 28 |
| FBgn0028479 | 784.73 | 78 | 5 | VNSLGSEVSDEFER                | 36d | 28 |
| FBgn0028479 | 690.37 | 39 | 1 | VVGMHYFSPVDK                  | 36d | 28 |
| FBgn0028479 | 985.8  | 53 | 3 | DQTLASLRPTLDYSDFK             | 42d | 28 |
| FBgn0028479 | 924.04 | 72 | 2 | FGFPVGAATLADEVGIDVGSHIAVDLAK  | 42d | 28 |
| FBgn0028479 | 508.83 | 66 | 4 | IAAGSSRPEK                    | 42d | 28 |
| FBgn0028479 | 1518.4 | 45 | 2 | LGIVDLLVDPLG PGLQPAEQNTIEYLEK | 42d | 28 |
| FBgn0028479 | 918.92 | 62 | 3 | LGLPEVMLGLLPGGGGTVR           | 42d | 28 |
| FBgn0028479 | 785.03 | 75 | 2 | MQLEIITHPGTSK                 | 42d | 28 |
| FBgn0028479 | 638    | 73 | 3 | TAVQVANDLASGK                 | 42d | 28 |
| FBgn0028479 | 785.08 | 73 | 4 | VNSLGSEVSDEFER                | 42d | 28 |
| FBgn0028479 | 690.52 | 40 | 2 | VVGMHYFSPVDK                  | 42d | 28 |
| FBgn0028479 | 986.08 | 53 | 3 | DQTLASLRPTLDYSDFK             | 46d | 28 |
| FBgn0028479 | 924.18 | 48 | 3 | FGFPVGAATLADEVGIDVGSHIAVDLAK  | 46d | 28 |
| FBgn0028479 | 763.58 | 54 | 3 | GTRPVNNDAL EIVK               | 46d | 28 |
| FBgn0028479 | 715.71 | 44 | 1 | IQSFVMDTDFVK                  | 46d | 28 |
| FBgn0028479 | 919.09 | 50 | 2 | LGLPEVMLGLLPGGGGTVR           | 46d | 28 |
| FBgn0028479 | 789.12 | 46 | 1 | LTSVPTALDMELT GK              | 46d | 28 |
| FBgn0028479 | 785.02 | 81 | 2 | MQLEIITHPGTSK                 | 46d | 28 |

|             |         |    |   |                              |     |    |
|-------------|---------|----|---|------------------------------|-----|----|
| FBgn0028479 | 795.8   | 90 | 3 | NADIIIIEAVFEDIK              | 46d | 28 |
| FBgn0028479 | 637.78  | 39 | 1 | TAVQVANDLASGK                | 46d | 28 |
| FBgn0028479 | 784.79  | 73 | 4 | VNSLGSEVSDEFER               | 46d | 28 |
| FBgn0028479 | 690.53  | 46 | 1 | VVGMHYFSPVDK                 | 46d | 28 |
| FBgn0028479 | 985.87  | 53 | 1 | DQTLASLRPTLDYSDFK            | 50d | 28 |
| FBgn0028479 | 593.66  | 54 | 1 | DTIAQAVAVGLK                 | 50d | 28 |
| FBgn0028479 | 924.24  | 50 | 3 | FGFPVGAATLADEVGIDVGSIAVDLAK  | 50d | 28 |
| FBgn0028479 | 764.09  | 63 | 2 | GTRPVNNDALIVK                | 50d | 28 |
| FBgn0028479 | 715.95  | 38 | 1 | IQSFVMDTDFVK                 | 50d | 28 |
| FBgn0028479 | 788.82  | 47 | 2 | LTSVPTALDMELTGK              | 50d | 28 |
| FBgn0028479 | 784.98  | 70 | 1 | MQLLEIITHPGTSK               | 50d | 28 |
| FBgn0028479 | 637.96  | 57 | 1 | TAVQVANDLASGK                | 50d | 28 |
| FBgn0028479 | 784.84  | 74 | 3 | VNSLGSEVSDEFER               | 50d | 28 |
| FBgn0028479 | 690.43  | 42 | 1 | VVGMHYFSPVDK                 | 50d | 28 |
| FBgn0028479 | 985.94  | 57 | 4 | DQTLASLRPTLDYSDFK            | 52d | 28 |
| FBgn0028479 | 1247.12 | 64 | 2 | ELEAVVPEHCVIATNTSAIPITK      | 52d | 28 |
| FBgn0028479 | 924.22  | 75 | 4 | FGFPVGAATLADEVGIDVGSIAVDLAK  | 52d | 28 |
| FBgn0028479 | 1518.33 | 53 | 2 | LGIVDLLVDPLGPGLPQAEQNTIEYLEK | 52d | 28 |
| FBgn0028479 | 784.88  | 54 | 1 | MQLLEIITHPGTSK               | 52d | 28 |
| FBgn0028479 | 796.15  | 93 | 1 | NADIIIIEAVFEDIK              | 52d | 28 |
| FBgn0028479 | 784.83  | 74 | 2 | VNSLGSEVSDEFER               | 52d | 28 |
| FBgn0028479 | 986.1   | 50 | 2 | DQTLASLRPTLDYSDFK            | 56d | 28 |
| FBgn0028479 | 612.97  | 45 | 2 | LGLPEVMLGLLPGGGGTVR          | 56d | 28 |
| FBgn0028479 | 788.9   | 48 | 2 | LTSVPTALDMELTGK              | 56d | 28 |
| FBgn0028479 | 784.92  | 75 | 2 | MQLLEIITHPGTSK               | 56d | 28 |
| FBgn0028479 | 500.05  | 39 | 1 | STNPAPVANK                   | 56d | 28 |
| FBgn0028490 | 694.77  | 79 | 2 | VVSSNSYSGGGGGGGTHGGDDK       | 2d  | 28 |
| FBgn0028510 | 613.24  | 54 | 4 | LVPGGPTEQAQK                 | 2d  | 28 |
| FBgn0028510 | 781.67  | 41 | 1 | NTVFLKDLNDFGAVNEVYKR         | 32d | 28 |
| FBgn0028552 | 1016.34 | 70 | 1 | SASLYQQHGSPEAAASALDK         | 12d | 28 |
| FBgn0028554 | 808.94  | 34 | 1 | SGGGGGGGGGGGGGGLGGRDR        | 2d  | 18 |
| FBgn0028554 | 809.07  | 40 | 2 | SGGGGGGGGGGGGGGLGGRDR        | 12d | 28 |

|             |         |    |   |                          |      |    |
|-------------|---------|----|---|--------------------------|------|----|
| FBgn0028646 | 853.33  | 38 | 1 | ITTPLEQAAASVTTENLDHIGGYR | 102d | 18 |
| FBgn0028646 | 1124.01 | 52 | 1 | DPAGTGFISPLDFQDIIVNVK    | 56d  | 28 |
| FBgn0028671 | 955.9   | 62 | 2 | DGIPMLDTGESPEAPQPR       | 2d   | 18 |
| FBgn0028671 | 956.17  | 65 | 2 | DGIPMLDTGESPEAPQPR       | 42d  | 18 |
| FBgn0028671 | 554.35  | 43 | 1 | NFLELTELK                | 42d  | 18 |
| FBgn0028671 | 870.6   | 61 | 2 | IEDLNTVLGQTQDHR          | 62d  | 18 |
| FBgn0028671 | 870.36  | 78 | 3 | IEDLNTVLGQTQDHR          | 82d  | 18 |
| FBgn0028671 | 955.44  | 48 | 1 | DGIPMLDTGESPEAPQPR       | 102d | 18 |
| FBgn0028671 | 955.97  | 64 | 1 | DGIPMLDTGESPEAPQPR       | 132d | 18 |
| FBgn0028671 | 870.46  | 68 | 2 | IEDLNTVLGQTQDHR          | 132d | 18 |
| FBgn0028671 | 956.17  | 68 | 1 | DGIPMLDTGESPEAPQPR       | 142d | 18 |
| FBgn0028671 | 956.13  | 84 | 3 | DGIPMLDTGESPEAPQPR       | 2d   | 28 |
| FBgn0028671 | 870.47  | 46 | 2 | IEDLNTVLGQTQDHR          | 2d   | 28 |
| FBgn0028671 | 870.57  | 47 | 1 | IEDLNTVLGQTQDHR          | 12d  | 28 |
| FBgn0028671 | 870.34  | 39 | 1 | IEDLNTVLGQTQDHR          | 50d  | 28 |
| FBgn0028686 | 404.67  | 37 | 1 | YKKLQK                   | 2d   | 18 |
| FBgn0028690 | 810.98  | 65 | 1 | TGLTPVDSAASTDEQK         | 2d   | 28 |
| FBgn0028690 | 811.09  | 40 | 1 | TGLTPVDSAASTDEQK         | 12d  | 28 |
| FBgn0028690 | 450.71  | 34 | 1 | DSTKHGKK                 | 50d  | 28 |
| FBgn0028691 | 662.43  | 46 | 1 | AISFTDIAQETK             | 56d  | 28 |
| FBgn0028707 | 540.09  | 35 | 1 | IVQQRDLLHQVR             | 22d  | 28 |
| FBgn0028737 | 990.05  | 60 | 3 | SSVLLDVKPWDEETDMK        | 2d   | 18 |
| FBgn0028744 | 749.84  | 36 | 1 | GEYLVSGSDDKTVK           | 2d   | 18 |
| FBgn0028744 | 749.79  | 46 | 1 | GEYLVSGSDDKTVK           | 42d  | 18 |
| FBgn0028744 | 749.78  | 40 | 1 | GEYLVSGSDDKTVK           | 82d  | 18 |
| FBgn0028744 | 749.83  | 39 | 1 | GEYLVSGSDDKTVK           | 122d | 18 |
| FBgn0028744 | 749.91  | 44 | 1 | GEYLVSGSDDKTVK           | 12d  | 28 |
| FBgn0028744 | 749.72  | 44 | 1 | GEYLVSGSDDKTVK           | 52d  | 28 |
| FBgn0028833 | 753.36  | 49 | 2 | FQFTHLSAGDLLR            | 2d   | 18 |
| FBgn0028833 | 822     | 61 | 3 | EGSEFGNLIEDYIR           | 42d  | 18 |
| FBgn0028833 | 821.76  | 54 | 2 | EGSEFGNLIEDYIR           | 62d  | 18 |
| FBgn0028833 | 822.08  | 45 | 1 | EGSEFGNLIEDYIR           | 82d  | 18 |

|             |         |    |   |                                 |      |    |
|-------------|---------|----|---|---------------------------------|------|----|
| FBgn0028833 | 753.58  | 46 | 1 | FQFTHLSAGDLLR                   | 82d  | 18 |
| FBgn0028833 | 821.56  | 38 | 2 | EGSEFGNLIEDYIR                  | 112d | 18 |
| FBgn0028833 | 821.72  | 74 | 2 | EGSEFGNLIEDYIR                  | 2d   | 28 |
| FBgn0028833 | 739.9   | 36 | 1 | ISTYNNDSLPIIK                   | 2d   | 28 |
| FBgn0028833 | 753.43  | 63 | 2 | FQFTHLSAGDLLR                   | 12d  | 28 |
| FBgn0028833 | 946.51  | 71 | 1 | RIDASPDAEEVFGEVEK               | 12d  | 28 |
| FBgn0028833 | 753.42  | 60 | 3 | FQFTHLSAGDLLR                   | 32d  | 28 |
| FBgn0028833 | 753.26  | 49 | 1 | FQFTHLSAGDLLR                   | 36d  | 28 |
| FBgn0028833 | 753.54  | 69 | 2 | FQFTHLSAGDLLR                   | 42d  | 28 |
| FBgn0028833 | 821.79  | 61 | 3 | EGSEFGNLIEDYIR                  | 50d  | 28 |
| FBgn0028833 | 753.21  | 43 | 2 | FQFTHLSAGDLLR                   | 50d  | 28 |
| FBgn0028833 | 821.84  | 54 | 1 | EGSEFGNLIEDYIR                  | 52d  | 28 |
| FBgn0028833 | 821.85  | 58 | 3 | EGSEFGNLIEDYIR                  | 56d  | 28 |
| FBgn0028968 | 974.27  | 37 | 1 | TSIVDTIITIEENADAK               | 2d   | 18 |
| FBgn0028968 | 649.75  | 52 | 2 | TSIVDTIITIEENADAK               | 42d  | 18 |
| FBgn0028986 | 688.05  | 40 | 1 | ELGANVIELPYR                    | 82d  | 18 |
| FBgn0029093 | 997.72  | 62 | 1 | DQTFAEALSEPGLVFVAAK             | 112d | 18 |
| FBgn0029093 | 997.36  | 48 | 2 | DQTFAEALSEPGLVFVAAK             | 122d | 18 |
| FBgn0029093 | 1109.02 | 42 | 1 | DPASPEGGEIIFGGSDPNHYTGEFTYLPVTR | 56d  | 28 |
| FBgn0029093 | 997.75  | 34 | 1 | DQTFAEALSEPGLVFVAAK             | 56d  | 28 |
| FBgn0029095 | 711.78  | 42 | 1 | FKLSFNLLAKLK                    | 50d  | 28 |
| FBgn0029133 | 1158.37 | 36 | 1 | NFEEVHQDLNIPVLPPLLVK            | 2d   | 18 |
| FBgn0029155 | 1136.73 | 74 | 3 | YGQNTLIQFEDFGNHNAFR             | 2d   | 18 |
| FBgn0029155 | 758.16  | 70 | 1 | YGQNTLIQFEDFGNHNAFR             | 22d  | 18 |
| FBgn0029155 | 1011.16 | 67 | 1 | EYDEFIDEFMEAVVQR                | 42d  | 18 |
| FBgn0029155 | 691.62  | 66 | 2 | IYMVDIDGLLTK                    | 42d  | 18 |
| FBgn0029155 | 888.44  | 37 | 1 | VIFSSGSPFPVQIGDK                | 42d  | 18 |
| FBgn0029155 | 758.04  | 55 | 2 | YGQNTLIQFEDFGNHNAFR             | 42d  | 18 |
| FBgn0029155 | 1136.39 | 82 | 1 | YGQNTLIQFEDFGNHNAFR             | 62d  | 18 |
| FBgn0029155 | 758.03  | 67 | 1 | YGQNTLIQFEDFGNHNAFR             | 82d  | 18 |
| FBgn0029155 | 757.78  | 60 | 1 | YGQNTLIQFEDFGNHNAFR             | 102d | 18 |
| FBgn0029155 | 757.99  | 78 | 2 | YGQNTLIQFEDFGNHNAFR             | 112d | 18 |

|             |         |     |   |                                |      |    |
|-------------|---------|-----|---|--------------------------------|------|----|
| FBgn0029155 | 758.13  | 55  | 2 | YGQNTLIQFEDFGNHNAFR            | 132d | 18 |
| FBgn0029155 | 1136.77 | 61  | 1 | YGQNTLIQFEDFGNHNAFR            | 142d | 18 |
| FBgn0029155 | 846.94  | 54  | 1 | AMVQDGVPIEEAYNR                | 2d   | 28 |
| FBgn0029155 | 653.8   | 53  | 3 | GLASTYPEPQDK                   | 2d   | 28 |
| FBgn0029155 | 1136.53 | 59  | 3 | YGQNTLIQFEDFGNHNAFR            | 2d   | 28 |
| FBgn0029155 | 653.9   | 38  | 1 | GLASTYPEPQDK                   | 12d  | 28 |
| FBgn0029155 | 1136.22 | 82  | 3 | YGQNTLIQFEDFGNHNAFR            | 12d  | 28 |
| FBgn0029155 | 758.01  | 69  | 1 | YGQNTLIQFEDFGNHNAFR            | 22d  | 28 |
| FBgn0029155 | 758.13  | 45  | 1 | YGQNTLIQFEDFGNHNAFR            | 32d  | 28 |
| FBgn0029155 | 846.96  | 40  | 1 | AMVQDGVPIEEAYNR                | 42d  | 28 |
| FBgn0029155 | 757.87  | 58  | 2 | YGQNTLIQFEDFGNHNAFR            | 42d  | 28 |
| FBgn0029155 | 846.97  | 53  | 2 | AMVQDGVPIEEAYNR                | 46d  | 28 |
| FBgn0029155 | 846.96  | 65  | 2 | AMVQDGVPIEEAYNR                | 50d  | 28 |
| FBgn0029155 | 1136.31 | 59  | 1 | YGQNTLIQFEDFGNHNAFR            | 50d  | 28 |
| FBgn0029155 | 1136.42 | 67  | 1 | YGQNTLIQFEDFGNHNAFR            | 52d  | 28 |
| FBgn0029170 | 1146.2  | 47  | 1 | APSPPSYQAPVIPLQPQNEEK          | 102d | 18 |
| FBgn0029176 | 1006.63 | 86  | 3 | AAEPAEELDAADEALAAEPK           | 42d  | 18 |
| FBgn0029176 | 1006.61 | 36  | 1 | AAEPAEELDAADEALAAEPK           | 62d  | 18 |
| FBgn0029176 | 1006.42 | 84  | 3 | AAEPAEELDAADEALAAEPK           | 102d | 18 |
| FBgn0029176 | 1006.57 | 76  | 1 | AAEPAEELDAADEALAAEPK           | 2d   | 28 |
| FBgn0029176 | 1070.25 | 77  | 1 | KAAEPAEELDAADEALAAEPK          | 12d  | 28 |
| FBgn0029176 | 1006.46 | 36  | 1 | AAEPAEELDAADEALAAEPK           | 36d  | 28 |
| FBgn0029280 | 950.58  | 42  | 1 | ENSAEGKQQQQQQPATK              | 2d   | 28 |
| FBgn0029280 | 593.54  | 34  | 1 | QQQQQQPATK                     | 36d  | 28 |
| FBgn0029577 | 1394.78 | 51  | 1 | ATTTATGGAAGPVPEGDAVMATTNQDALAK | 2d   | 18 |
| FBgn0029577 | 1394.5  | 102 | 3 | ATTTATGGAAGPVPEGDAVMATTNQDALAK | 22d  | 18 |
| FBgn0029577 | 1394.59 | 37  | 1 | ATTTATGGAAGPVPEGDAVMATTNQDALAK | 112d | 18 |
| FBgn0029577 | 1394.67 | 35  | 1 | ATTTATGGAAGPVPEGDAVMATTNQDALAK | 122d | 18 |
| FBgn0029577 | 1394.82 | 34  | 1 | ATTTATGGAAGPVPEGDAVMATTNQDALAK | 12d  | 28 |
| FBgn0029656 | 372.73  | 34  | 1 | KVGAKIK                        | 56d  | 28 |
| FBgn0029687 | 1161.14 | 90  | 3 | FKPSNLLTSESLDLLSGEIK           | 2d   | 18 |
| FBgn0029687 | 955.53  | 60  | 3 | SLFDLPLTIEPEHELK               | 2d   | 18 |

|             |         |    |   |                            |      |    |
|-------------|---------|----|---|----------------------------|------|----|
| FBgn0029687 | 1160.92 | 62 | 1 | FKPSNLEETSESLDLLSGEIK      | 42d  | 18 |
| FBgn0029687 | 955.67  | 59 | 3 | SLFDLPLTIEPEHELK           | 42d  | 18 |
| FBgn0029687 | 1161.12 | 91 | 2 | FKPSNLEETSESLDLLSGEIK      | 62d  | 18 |
| FBgn0029687 | 955.47  | 61 | 1 | SLFDLPLTIEPEHELK           | 82d  | 18 |
| FBgn0029687 | 1160.94 | 56 | 1 | FKPSNLEETSESLDLLSGEIK      | 122d | 18 |
| FBgn0029687 | 1160.98 | 81 | 3 | FKPSNLEETSESLDLLSGEIK      | 12d  | 28 |
| FBgn0029687 | 955.08  | 34 | 1 | SLFDLPLTIEPEHELK           | 12d  | 28 |
| FBgn0029687 | 955.55  | 45 | 1 | SLFDLPLTIEPEHELK           | 22d  | 28 |
| FBgn0029687 | 955.71  | 46 | 1 | SLFDLPLTIEPEHELK           | 32d  | 28 |
| FBgn0029687 | 955.63  | 59 | 1 | SLFDLPLTIEPEHELK           | 42d  | 28 |
| FBgn0029687 | 955.54  | 37 | 1 | SLFDLPLTIEPEHELK           | 46d  | 28 |
| FBgn0029687 | 955.31  | 63 | 2 | SLFDLPLTIEPEHELK           | 50d  | 28 |
| FBgn0029687 | 1161.06 | 76 | 2 | FKPSNLEETSESLDLLSGEIK      | 52d  | 28 |
| FBgn0029687 | 955.46  | 70 | 1 | SLFDLPLTIEPEHELK           | 52d  | 28 |
| FBgn0029687 | 955.74  | 40 | 1 | SLFDLPLTIEPEHELK           | 56d  | 28 |
| FBgn0029764 | 373.06  | 34 | 1 | KRAFINQIK                  | 56d  | 28 |
| FBgn0029779 | 909     | 51 | 2 | GAAYQEAPVDAEVAVTPK         | 2d   | 18 |
| FBgn0029779 | 1084.89 | 83 | 3 | THAGPNSEFEVLDGEDILPK       | 2d   | 18 |
| FBgn0029779 | 1084.92 | 70 | 1 | THAGPNSEFEVLDGEDILPK       | 42d  | 18 |
| FBgn0029779 | 1085.21 | 75 | 3 | THAGPNSEFEVLDGEDILPK       | 82d  | 18 |
| FBgn0029779 | 909     | 50 | 1 | GAAYQEAPVDAEVAVTPK         | 2d   | 28 |
| FBgn0029779 | 1084.98 | 79 | 3 | THAGPNSEFEVLDGEDILPK       | 2d   | 28 |
| FBgn0029779 | 966.5   | 41 | 1 | VATVDVEGGDNMATLPVSR        | 2d   | 28 |
| FBgn0029779 | 908.82  | 60 | 1 | GAAYQEAPVDAEVAVTPK         | 12d  | 28 |
| FBgn0029779 | 1084.94 | 48 | 1 | THAGPNSEFEVLDGEDILPK       | 12d  | 28 |
| FBgn0029823 | 1016.16 | 57 | 2 | GLAEQDIEQVAFIDAALK         | 2d   | 18 |
| FBgn0029823 | 1311.87 | 48 | 1 | INQAVFPSLQGGPHNNAVAGIATAFK | 2d   | 18 |
| FBgn0029823 | 975.73  | 63 | 1 | LLQTPLAQGDPELAELIK         | 102d | 18 |
| FBgn0029823 | 975.68  | 41 | 1 | LLQTPLAQGDPELAELIK         | 122d | 18 |
| FBgn0029823 | 974.72  | 52 | 1 | VNPETGIIDYDKLAEAAK         | 122d | 18 |
| FBgn0029823 | 625.72  | 34 | 1 | YYGGNEYIDR                 | 122d | 18 |
| FBgn0029823 | 875.26  | 39 | 1 | INQAVFPSLQGGPHNNAVAGIATAFK | 142d | 18 |



|             |         |    |   |                            |      |    |
|-------------|---------|----|---|----------------------------|------|----|
| FBgn0029823 | 1312.2  | 63 | 1 | INQAVFPSLQGGPHNNAVAGIATAFK | 2d   | 28 |
| FBgn0029823 | 975.26  | 59 | 2 | LLQTPLAQGDPELAELIK         | 2d   | 28 |
| FBgn0029823 | 677.77  | 42 | 1 | GLAEQDIEQVAFIDAALK         | 12d  | 28 |
| FBgn0029823 | 975.74  | 40 | 2 | LLQTPLAQGDPELAELIK         | 42d  | 28 |
| FBgn0029823 | 974.38  | 49 | 1 | VNPETGIIDYDKLAEAAK         | 42d  | 28 |
| FBgn0029823 | 1312.26 | 50 | 2 | INQAVFPSLQGGPHNNAVAGIATAFK | 52d  | 28 |
| FBgn0029823 | 975.52  | 38 | 1 | LLQTPLAQGDPELAELIK         | 52d  | 28 |
| FBgn0029823 | 975.33  | 50 | 1 | LLQTPLAQGDPELAELIK         | 56d  | 28 |
| FBgn0029846 | 387.4   | 34 | 1 | IISERR                     | 12d  | 28 |
| FBgn0029856 | 895.1   | 46 | 1 | TITLEVEPSDTIENVK           | 22d  | 18 |
| FBgn0029863 | 469.2   | 40 | 1 | LIDFDADK                   | 112d | 18 |
| FBgn0029863 | 469.09  | 35 | 1 | LIDFDADK                   | 122d | 18 |
| FBgn0029863 | 469.15  | 35 | 1 | LIDFDADK                   | 132d | 18 |
| FBgn0029868 | 983.56  | 38 | 1 | NVPGWEVGTWYGEVFK           | 102d | 18 |
| FBgn0029899 | 1033.54 | 34 | 1 | IVEFACTHCDGTNTNLPDLRSQHWAR | 50d  | 28 |
| FBgn0029969 | 1277.32 | 88 | 2 | IVAFQDAETDPIDFPIAPALAIK    | 2d   | 18 |
| FBgn0029969 | 1276.96 | 50 | 2 | IVAFQDAETDPIDFPIAPALAIK    | 22d  | 18 |
| FBgn0029969 | 1277.36 | 58 | 2 | IVAFQDAETDPIDFPIAPALAIK    | 42d  | 18 |
| FBgn0029969 | 1277.34 | 57 | 2 | IVAFQDAETDPIDFPIAPALAIK    | 62d  | 18 |
| FBgn0029969 | 1277.35 | 61 | 2 | IVAFQDAETDPIDFPIAPALAIK    | 82d  | 18 |
| FBgn0029969 | 1277.2  | 51 | 1 | IVAFQDAETDPIDFPIAPALAIK    | 112d | 18 |
| FBgn0029969 | 1276.22 | 68 | 3 | IVAFQDAETDPIDFPIAPALAIK    | 122d | 18 |
| FBgn0029969 | 1277.43 | 34 | 1 | IVAFQDAETDPIDFPIAPALAIK    | 132d | 18 |
| FBgn0029969 | 1277.42 | 45 | 1 | IVAFQDAETDPIDFPIAPALAIK    | 142d | 18 |
| FBgn0029969 | 1277.18 | 43 | 2 | IVAFQDAETDPIDFPIAPALAIK    | 2d   | 28 |
| FBgn0029969 | 1277.28 | 45 | 2 | IVAFQDAETDPIDFPIAPALAIK    | 22d  | 28 |
| FBgn0029969 | 1277.13 | 55 | 2 | IVAFQDAETDPIDFPIAPALAIK    | 32d  | 28 |
| FBgn0029969 | 1277.13 | 73 | 2 | IVAFQDAETDPIDFPIAPALAIK    | 36d  | 28 |
| FBgn0029969 | 1277.23 | 47 | 1 | IVAFQDAETDPIDFPIAPALAIK    | 42d  | 28 |
| FBgn0029969 | 1277.25 | 59 | 3 | IVAFQDAETDPIDFPIAPALAIK    | 46d  | 28 |
| FBgn0029969 | 1277.07 | 56 | 3 | IVAFQDAETDPIDFPIAPALAIK    | 50d  | 28 |
| FBgn0029969 | 1277.4  | 72 | 3 | IVAFQDAETDPIDFPIAPALAIK    | 52d  | 28 |

|             |         |    |   |                              |      |    |
|-------------|---------|----|---|------------------------------|------|----|
| FBgn0029969 | 1277.1  | 65 | 3 | IVAFQDAETDPIDFPIAPALAI PK    | 56d  | 28 |
| FBgn0029969 | 1079.33 | 59 | 1 | TPIGSFQSQLAPLTATQLGAR        | 56d  | 28 |
| FBgn0029997 | 1000.64 | 45 | 1 | VVLTSLEQLYNGAINPYLEAVAVHVTGK | 42d  | 18 |
| FBgn0030004 | 372.99  | 36 | 1 | VANERR                       | 50d  | 28 |
| FBgn0030026 | 1246.27 | 58 | 1 | TDMGGSSAPLDVPTSTGQIVQTISK    | 122d | 18 |
| FBgn0030026 | 1245.92 | 53 | 3 | TDMGGSSAPLDVPTSTGQIVQTISK    | 56d  | 28 |
| FBgn0030054 | 912.58  | 38 | 1 | MLLAPIVRNSLQEQQR             | 12d  | 28 |
| FBgn0030060 | 842.77  | 87 | 1 | AAGSLEETYYGEHTR              | 2d   | 28 |
| FBgn0030105 | 1052.44 | 36 | 1 | VLEGEDLASAQQTLEASLTK         | 2d   | 18 |
| FBgn0030106 | 815.91  | 54 | 2 | ELEGVADGAEVEFHK              | 2d   | 18 |
| FBgn0030106 | 1240.07 | 55 | 2 | NFLILSKPLNETYLPLYQSPK        | 2d   | 18 |
| FBgn0030106 | 882.42  | 86 | 2 | LFLHLDEILPQALK               | 42d  | 18 |
| FBgn0030106 | 882.71  | 95 | 2 | LFLHLDEILPQALK               | 62d  | 18 |
| FBgn0030106 | 815.54  | 55 | 3 | ELEGVADGAEVEFHK              | 2d   | 28 |
| FBgn0030106 | 697.58  | 68 | 1 | ALLATSNVDDAFR                | 12d  | 28 |
| FBgn0030106 | 816.06  | 77 | 1 | ELEGVADGAEVEFHK              | 12d  | 28 |
| FBgn0030106 | 1240.15 | 62 | 2 | NFLILSKPLNETYLPLYQSPK        | 12d  | 28 |
| FBgn0030106 | 815.84  | 42 | 3 | ELEGVADGAEVEFHK              | 32d  | 28 |
| FBgn0030106 | 815.79  | 36 | 1 | ELEGVADGAEVEFHK              | 50d  | 28 |
| FBgn0030109 | 338.2   | 35 | 1 | VEEAVK                       | 22d  | 18 |
| FBgn0030122 | 807.61  | 39 | 1 | QCPPFSTLPDLALR               | 142d | 18 |
| FBgn0030136 | 688.19  | 72 | 2 | EGDILTLESER                  | 2d   | 28 |
| FBgn0030136 | 688.21  | 65 | 2 | EGDILTLESER                  | 56d  | 28 |
| FBgn0030151 | 466.59  | 37 | 1 | IKEWIDK                      | 46d  | 28 |
| FBgn0030160 | 661.53  | 51 | 3 | EVAEAAKPYTDK                 | 2d   | 28 |
| FBgn0030195 | 440.12  | 38 | 2 | SSINNSEK                     | 132d | 18 |
| FBgn0030205 | 965.86  | 35 | 1 | DQPSEGIQDQQQLQQQQQQQEV R     | 2d   | 28 |
| FBgn0030223 | 595.87  | 40 | 1 | DMNGSERLIKILLER              | 42d  | 18 |
| FBgn0030223 | 595.86  | 39 | 1 | DMNGSERLIKILLER              | 102d | 18 |
| FBgn0030223 | 596.3   | 38 | 2 | DMNGSERLIKILLER              | 112d | 18 |
| FBgn0030223 | 596.26  | 40 | 1 | DMNGSERLIKILLER              | 122d | 18 |
| FBgn0030223 | 596.05  | 38 | 2 | DMNGSERLIKILLER              | 132d | 18 |

|             |         |    |   |                                           |      |    |
|-------------|---------|----|---|-------------------------------------------|------|----|
| FBgn0030223 | 596.47  | 36 | 1 | DMNGSERLIKILLER                           | 36d  | 28 |
| FBgn0030223 | 595.95  | 36 | 1 | DMNGSERLIKILLER                           | 42d  | 28 |
| FBgn0030223 | 330.02  | 43 | 2 | INNVAK                                    | 42d  | 28 |
| FBgn0030239 | 723.06  | 49 | 1 | VIPSASEEQLVQALGDLLQR                      | 22d  | 18 |
| FBgn0030239 | 723.21  | 39 | 1 | VIPSASEEQLVQALGDLLQR                      | 62d  | 18 |
| FBgn0030239 | 1084.27 | 64 | 1 | VIPSASEEQLVQALGDLLQR                      | 22d  | 28 |
| FBgn0030239 | 723.17  | 48 | 1 | VIPSASEEQLVQALGDLLQR                      | 32d  | 28 |
| FBgn0030239 | 723.21  | 50 | 1 | VIPSASEEQLVQALGDLLQR                      | 36d  | 28 |
| FBgn0030239 | 723.15  | 40 | 1 | VIPSASEEQLVQALGDLLQR                      | 42d  | 28 |
| FBgn0030239 | 1084.06 | 39 | 1 | VIPSASEEQLVQALGDLLQR                      | 46d  | 28 |
| FBgn0030251 | 658.66  | 37 | 1 | EQDIGTKGKIVK                              | 2d   | 28 |
| FBgn0030251 | 659.02  | 36 | 1 | EQDIGTKGKIVK                              | 12d  | 28 |
| FBgn0030268 | 1217.08 | 42 | 1 | IASAVPNNTLPNPSAAASAGPAAQGVATAATTQGAGGASTR | 2d   | 18 |
| FBgn0030268 | 589.75  | 46 | 1 | SHAVFQIVLRPQGSTK                          | 22d  | 18 |
| FBgn0030268 | 1217.02 | 67 | 2 | IASAVPNNTLPNPSAAASAGPAAQGVATAATTQGAGGASTR | 2d   | 28 |
| FBgn0030293 | 567.65  | 36 | 1 | SGPPVVGANSKMSAQR                          | 42d  | 18 |
| FBgn0030311 | 719.66  | 38 | 1 | MSEAGTSADAVAAEK                           | 22d  | 18 |
| FBgn0030317 | 1229.57 | 67 | 1 | IPQLNQTFGDQLLEGDDEPEAK                    | 22d  | 18 |
| FBgn0030317 | 1012.11 | 40 | 1 | ETAAYEVFLPLTALIQDK                        | 42d  | 18 |
| FBgn0030317 | 1189.48 | 97 | 2 | HLENMLEDYYEELGLQLIR                       | 102d | 18 |
| FBgn0030317 | 976.08  | 35 | 1 | QLVSQLWPELGANPELR                         | 102d | 18 |
| FBgn0030317 | 1018.56 | 56 | 2 | QSQEVIEVASDQGNSPDSTESYPDVDQK              | 102d | 18 |
| FBgn0030317 | 1299.18 | 88 | 3 | LAEISASEIQLTGNLAAPAEQVDQK                 | 112d | 18 |
| FBgn0030317 | 1526.99 | 67 | 3 | QSQEVIEVASDQGNSPDSTESYPDVDQK              | 112d | 18 |
| FBgn0030317 | 608.2   | 45 | 1 | FLDLSVEHVR                                | 132d | 18 |
| FBgn0030317 | 1175.13 | 70 | 1 | IEAGATDLHGAGFLGAGNEATFK                   | 132d | 18 |
| FBgn0030317 | 1229.77 | 72 | 1 | IPQLNQTFGDQLLEGDDEPEAK                    | 132d | 18 |
| FBgn0030317 | 1299.12 | 75 | 1 | LAEISASEIQLTGNLAAPAEQVDQK                 | 132d | 18 |
| FBgn0030317 | 1527.17 | 64 | 3 | QSQEVIEVASDQGNSPDSTESYPDVDQK              | 132d | 18 |
| FBgn0030317 | 1012.19 | 36 | 1 | ETAAYEVFLPLTALIQDK                        | 142d | 18 |
| FBgn0030317 | 1189.92 | 64 | 1 | HLENMLEDYYEELGLQLIR                       | 142d | 18 |
| FBgn0030317 | 1299.38 | 68 | 1 | LAEISASEIQLTGNLAAPAEQVDQK                 | 142d | 18 |

|             |         |     |   |                                 |      |    |
|-------------|---------|-----|---|---------------------------------|------|----|
| FBgn0030317 | 889.06  | 60  | 1 | MQQLQQLVDIFEQR                  | 142d | 18 |
| FBgn0030317 | 1018.25 | 47  | 2 | QSQEVIEV ASDQGN SPDSTESYPD VDQK | 142d | 18 |
| FBgn0030317 | 1229.67 | 46  | 1 | IPQLNQTFGDQLLEG DDEPEAK         | 2d   | 28 |
| FBgn0030317 | 1018.58 | 56  | 1 | QSQEVIEV ASDQGN SPDSTESYPD VDQK | 2d   | 28 |
| FBgn0030317 | 1190.14 | 89  | 1 | HLENMLEDYEEELGLQLIR             | 12d  | 28 |
| FBgn0030317 | 1229.57 | 81  | 1 | IPQLNQTFGDQLLEG DDEPEAK         | 22d  | 28 |
| FBgn0030317 | 1189.85 | 80  | 1 | HLENMLEDYEEELGLQLIR             | 42d  | 28 |
| FBgn0030317 | 1229.46 | 68  | 1 | IPQLNQTFGDQLLEG DDEPEAK         | 42d  | 28 |
| FBgn0030317 | 1011.95 | 52  | 2 | ETAAYEVFLPLTALI QDK             | 56d  | 28 |
| FBgn0030329 | 1311.17 | 87  | 3 | LTPQQLTGEDEFDQAIAEGVAFIK        | 2d   | 18 |
| FBgn0030347 | 1127.72 | 57  | 1 | IPDYYADSVADVAQMLGEAPK           | 22d  | 28 |
| FBgn0030362 | 648.85  | 36  | 1 | FDQPAPAGTTYK                    | 2d   | 18 |
| FBgn0030362 | 1133.44 | 100 | 6 | VEPLPDSYAGLGEGPHWDVAR           | 2d   | 18 |
| FBgn0030362 | 588.94  | 35  | 1 | YIGDEFEFR                       | 2d   | 18 |
| FBgn0030362 | 847.25  | 80  | 1 | SYDYDFETGVASNPK                 | 22d  | 18 |
| FBgn0030362 | 752.9   | 56  | 1 | VTGLNATGYPGVNLK                 | 22d  | 18 |
| FBgn0030362 | 736.18  | 61  | 1 | VVIVNWDGVSPSAK                  | 22d  | 18 |
| FBgn0030362 | 1133.57 | 75  | 3 | VEPLPDSYAGLGEGPHWDVAR           | 42d  | 18 |
| FBgn0030362 | 756.16  | 68  | 2 | VEPLPDSYAGLGEGPHWDVAR           | 62d  | 18 |
| FBgn0030362 | 736.52  | 83  | 2 | VVIVNWDGVSPSAK                  | 62d  | 18 |
| FBgn0030362 | 588.75  | 36  | 2 | YIGDEFEFR                       | 62d  | 18 |
| FBgn0030362 | 648.8   | 50  | 1 | FDQPAPAGTTYK                    | 82d  | 18 |
| FBgn0030362 | 1133.41 | 85  | 3 | VEPLPDSYAGLGEGPHWDVAR           | 82d  | 18 |
| FBgn0030362 | 1126.58 | 45  | 1 | QITSAAFGGPNLDILYVTTAAK          | 102d | 18 |
| FBgn0030362 | 1133.42 | 72  | 2 | VEPLPDSYAGLGEGPHWDVAR           | 102d | 18 |
| FBgn0030362 | 736.46  | 82  | 2 | VVIVNWDGVSPSAK                  | 102d | 18 |
| FBgn0030362 | 755.92  | 37  | 1 | VEPLPDSYAGLGEGPHWDVAR           | 112d | 18 |
| FBgn0030362 | 648.71  | 36  | 1 | FDQPAPAGTTYK                    | 122d | 18 |
| FBgn0030362 | 1133.57 | 72  | 1 | VEPLPDSYAGLGEGPHWDVAR           | 122d | 18 |
| FBgn0030362 | 736.5   | 71  | 3 | VVIVNWDGVSPSAK                  | 122d | 18 |
| FBgn0030362 | 588.9   | 37  | 1 | YIGDEFEFR                       | 122d | 18 |
| FBgn0030362 | 756.18  | 72  | 3 | VEPLPDSYAGLGEGPHWDVAR           | 132d | 18 |

|             |         |     |   |                                 |      |    |
|-------------|---------|-----|---|---------------------------------|------|----|
| FBgn0030362 | 648.98  | 37  | 1 | FDQPAPAGTTYK                    | 142d | 18 |
| FBgn0030362 | 1133.47 | 93  | 2 | VEPLPDSYAGLGEGPHWDVAR           | 142d | 18 |
| FBgn0030362 | 736.26  | 64  | 2 | VVIVNWDGVSPSAK                  | 142d | 18 |
| FBgn0030362 | 589     | 36  | 1 | YIGDEFEFR                       | 142d | 18 |
| FBgn0030362 | 648.5   | 52  | 2 | FDQPAPAGTTYK                    | 2d   | 28 |
| FBgn0030362 | 756.1   | 76  | 3 | VEPLPDSYAGLGEGPHWDVAR           | 2d   | 28 |
| FBgn0030362 | 752.81  | 53  | 1 | VTGLNATGYPGVNLK                 | 2d   | 28 |
| FBgn0030362 | 736.29  | 71  | 3 | VVIVNWDGVSPSAK                  | 2d   | 28 |
| FBgn0030362 | 648.85  | 40  | 1 | FDQPAPAGTTYK                    | 12d  | 28 |
| FBgn0030362 | 847.54  | 51  | 1 | SYDYDFETGVASNPK                 | 12d  | 28 |
| FBgn0030362 | 1133.44 | 97  | 4 | VEPLPDSYAGLGEGPHWDVAR           | 12d  | 28 |
| FBgn0030362 | 752.77  | 40  | 1 | VTGLNATGYPGVNLK                 | 12d  | 28 |
| FBgn0030362 | 736.33  | 66  | 1 | VVIVNWDGVSPSAK                  | 12d  | 28 |
| FBgn0030362 | 1133.62 | 48  | 1 | VEPLPDSYAGLGEGPHWDVAR           | 22d  | 28 |
| FBgn0030362 | 756.18  | 35  | 1 | VEPLPDSYAGLGEGPHWDVAR           | 36d  | 28 |
| FBgn0030362 | 847.35  | 95  | 1 | SYDYDFETGVASNPK                 | 42d  | 28 |
| FBgn0030362 | 756.08  | 39  | 1 | VEPLPDSYAGLGEGPHWDVAR           | 42d  | 28 |
| FBgn0030362 | 736.35  | 68  | 1 | VVIVNWDGVSPSAK                  | 42d  | 28 |
| FBgn0030362 | 1133.48 | 60  | 2 | VEPLPDSYAGLGEGPHWDVAR           | 50d  | 28 |
| FBgn0030362 | 1133.42 | 89  | 3 | VEPLPDSYAGLGEGPHWDVAR           | 52d  | 28 |
| FBgn0030437 | 372.36  | 37  | 1 | KFLAHK                          | 42d  | 28 |
| FBgn0030437 | 371.61  | 38  | 1 | KFLAHK                          | 52d  | 28 |
| FBgn0030478 | 875.75  | 50  | 2 | ALVVINPGNPTGQVLTR               | 2d   | 18 |
| FBgn0030478 | 1110.95 | 115 | 3 | DGGIASNWQDIYLTGGASPGIK          | 2d   | 18 |
| FBgn0030478 | 696.48  | 64  | 2 | LLDSPDYPEDVK                    | 2d   | 18 |
| FBgn0030478 | 942.65  | 51  | 2 | VLVLADEVYQDNVYDK                | 2d   | 18 |
| FBgn0030478 | 875.61  | 52  | 1 | ALVVINPGNPTGQVLTR               | 22d  | 18 |
| FBgn0030478 | 696.35  | 60  | 2 | LLDSPDYPEDVK                    | 22d  | 18 |
| FBgn0030478 | 1112.79 | 64  | 2 | QVAQYIEKRDGGIASNWQDIYLTGGASPGIK | 22d  | 18 |
| FBgn0030478 | 875.38  | 37  | 1 | ALVVINPGNPTGQVLTR               | 42d  | 18 |
| FBgn0030478 | 1110.92 | 105 | 3 | DGGIASNWQDIYLTGGASPGIK          | 42d  | 18 |
| FBgn0030478 | 942.57  | 78  | 2 | VLVLADEVYQDNVYDK                | 42d  | 18 |

|             |         |     |   |                                 |      |    |
|-------------|---------|-----|---|---------------------------------|------|----|
| FBgn0030478 | 1111.19 | 122 | 3 | DGGIASNWQDIYLTGGASPGIK          | 62d  | 18 |
| FBgn0030478 | 696.44  | 66  | 3 | LLDSPDYPEDVK                    | 62d  | 18 |
| FBgn0030478 | 1112.38 | 48  | 1 | QVAQYIEKRDGGIASNWQDIYLTGGASPGIK | 62d  | 18 |
| FBgn0030478 | 515.41  | 45  | 1 | ALNSFEGYK                       | 82d  | 18 |
| FBgn0030478 | 1111.21 | 110 | 4 | DGGIASNWQDIYLTGGASPGIK          | 82d  | 18 |
| FBgn0030478 | 696.35  | 59  | 2 | LLDSPDYPEDVK                    | 82d  | 18 |
| FBgn0030478 | 1112.34 | 41  | 2 | QVAQYIEKRDGGIASNWQDIYLTGGASPGIK | 82d  | 18 |
| FBgn0030478 | 942.44  | 54  | 1 | VLVLADEVYQDNVYDK                | 82d  | 18 |
| FBgn0030478 | 1111.08 | 106 | 2 | DGGIASNWQDIYLTGGASPGIK          | 102d | 18 |
| FBgn0030478 | 1112.51 | 55  | 2 | QVAQYIEKRDGGIASNWQDIYLTGGASPGIK | 102d | 18 |
| FBgn0030478 | 942.66  | 36  | 1 | VLVLADEVYQDNVYDK                | 102d | 18 |
| FBgn0030478 | 875.62  | 53  | 1 | ALVVINPGNPTGQVLTR               | 112d | 18 |
| FBgn0030478 | 1111.02 | 115 | 2 | DGGIASNWQDIYLTGGASPGIK          | 112d | 18 |
| FBgn0030478 | 1112.61 | 63  | 1 | QVAQYIEKRDGGIASNWQDIYLTGGASPGIK | 112d | 18 |
| FBgn0030478 | 942.54  | 36  | 1 | VLVLADEVYQDNVYDK                | 112d | 18 |
| FBgn0030478 | 1111.08 | 83  | 4 | DGGIASNWQDIYLTGGASPGIK          | 122d | 18 |
| FBgn0030478 | 942.64  | 46  | 1 | VLVLADEVYQDNVYDK                | 122d | 18 |
| FBgn0030478 | 1106.91 | 54  | 1 | VLVLADEVYQDNVYDKNSK             | 122d | 18 |
| FBgn0030478 | 696.41  | 61  | 2 | LLDSPDYPEDVK                    | 132d | 18 |
| FBgn0030478 | 1112.3  | 67  | 2 | QVAQYIEKRDGGIASNWQDIYLTGGASPGIK | 132d | 18 |
| FBgn0030478 | 942.56  | 52  | 1 | VLVLADEVYQDNVYDK                | 132d | 18 |
| FBgn0030478 | 1111.28 | 136 | 2 | DGGIASNWQDIYLTGGASPGIK          | 142d | 18 |
| FBgn0030478 | 942.6   | 42  | 1 | VLVLADEVYQDNVYDK                | 142d | 18 |
| FBgn0030478 | 875.68  | 58  | 1 | ALVVINPGNPTGQVLTR               | 2d   | 28 |
| FBgn0030478 | 1110.9  | 111 | 2 | DGGIASNWQDIYLTGGASPGIK          | 2d   | 28 |
| FBgn0030478 | 696.56  | 66  | 3 | LLDSPDYPEDVK                    | 2d   | 28 |
| FBgn0030478 | 942.48  | 72  | 1 | VLVLADEVYQDNVYDK                | 2d   | 28 |
| FBgn0030478 | 1111.22 | 108 | 2 | DGGIASNWQDIYLTGGASPGIK          | 12d  | 28 |
| FBgn0030478 | 696.2   | 62  | 2 | LLDSPDYPEDVK                    | 12d  | 28 |
| FBgn0030478 | 942.4   | 46  | 1 | VLVLADEVYQDNVYDK                | 12d  | 28 |
| FBgn0030478 | 875.62  | 47  | 1 | ALVVINPGNPTGQVLTR               | 22d  | 28 |
| FBgn0030478 | 1110.1  | 79  | 2 | DGGIASNWQDIYLTGGASPGIK          | 22d  | 28 |

|             |         |     |   |                                 |     |    |
|-------------|---------|-----|---|---------------------------------|-----|----|
| FBgn0030478 | 696.28  | 60  | 2 | LLDSPDYPEDVK                    | 22d | 28 |
| FBgn0030478 | 1112.58 | 78  | 2 | QVAQYIEKRDGGIASNWQDIYLTGGASPGIK | 22d | 28 |
| FBgn0030478 | 401.61  | 34  | 1 | AIEAAKAK                        | 32d | 28 |
| FBgn0030478 | 515.41  | 42  | 1 | ALNSFEGYK                       | 32d | 28 |
| FBgn0030478 | 1111.28 | 86  | 2 | DGGIASNWQDIYLTGGASPGIK          | 32d | 28 |
| FBgn0030478 | 668.92  | 39  | 1 | GGYMEVLNLDPK                    | 32d | 28 |
| FBgn0030478 | 696.23  | 69  | 3 | LLDSPDYPEDVK                    | 32d | 28 |
| FBgn0030478 | 1112.15 | 54  | 1 | QVAQYIEKRDGGIASNWQDIYLTGGASPGIK | 32d | 28 |
| FBgn0030478 | 601.39  | 44  | 2 | VAYEMGDPYR                      | 32d | 28 |
| FBgn0030478 | 942.7   | 101 | 2 | VLVLADEVYQDNVYDK                | 32d | 28 |
| FBgn0030478 | 875.41  | 34  | 1 | ALVVINPGNPTGQVLTR               | 36d | 28 |
| FBgn0030478 | 1110.88 | 92  | 3 | DGGIASNWQDIYLTGGASPGIK          | 36d | 28 |
| FBgn0030478 | 669.06  | 34  | 1 | GGYMEVLNLDPK                    | 36d | 28 |
| FBgn0030478 | 696.49  | 60  | 1 | LLDSPDYPEDVK                    | 36d | 28 |
| FBgn0030478 | 1112.56 | 47  | 1 | QVAQYIEKRDGGIASNWQDIYLTGGASPGIK | 36d | 28 |
| FBgn0030478 | 942.36  | 85  | 1 | VLVLADEVYQDNVYDK                | 36d | 28 |
| FBgn0030478 | 875.64  | 39  | 1 | ALVVINPGNPTGQVLTR               | 42d | 28 |
| FBgn0030478 | 1110.87 | 78  | 2 | DGGIASNWQDIYLTGGASPGIK          | 42d | 28 |
| FBgn0030478 | 696.26  | 60  | 1 | LLDSPDYPEDVK                    | 42d | 28 |
| FBgn0030478 | 1112.61 | 83  | 1 | QVAQYIEKRDGGIASNWQDIYLTGGASPGIK | 42d | 28 |
| FBgn0030478 | 601.27  | 50  | 2 | VAYEMGDPYR                      | 42d | 28 |
| FBgn0030478 | 942.66  | 86  | 2 | VLVLADEVYQDNVYDK                | 42d | 28 |
| FBgn0030478 | 401.8   | 38  | 1 | AIEAAKAK                        | 46d | 28 |
| FBgn0030478 | 515.25  | 40  | 3 | ALNSFEGYK                       | 46d | 28 |
| FBgn0030478 | 1111.24 | 109 | 3 | DGGIASNWQDIYLTGGASPGIK          | 46d | 28 |
| FBgn0030478 | 696.3   | 60  | 1 | LLDSPDYPEDVK                    | 46d | 28 |
| FBgn0030478 | 1112.14 | 56  | 2 | QVAQYIEKRDGGIASNWQDIYLTGGASPGIK | 46d | 28 |
| FBgn0030478 | 601.2   | 52  | 3 | VAYEMGDPYR                      | 46d | 28 |
| FBgn0030478 | 942.69  | 79  | 2 | VLVLADEVYQDNVYDK                | 46d | 28 |
| FBgn0030478 | 875.61  | 37  | 1 | ALVVINPGNPTGQVLTR               | 50d | 28 |
| FBgn0030478 | 1110.97 | 89  | 3 | DGGIASNWQDIYLTGGASPGIK          | 50d | 28 |
| FBgn0030478 | 668.95  | 48  | 1 | GGYMEVLNLDPK                    | 50d | 28 |

|             |         |     |   |                                 |      |    |
|-------------|---------|-----|---|---------------------------------|------|----|
| FBgn0030478 | 696.3   | 42  | 1 | LLDSPDYPEDVK                    | 50d  | 28 |
| FBgn0030478 | 1112.22 | 80  | 1 | QVAQYIEKRDGGIASNWQDIYLTGGASPGIK | 50d  | 28 |
| FBgn0030478 | 875.66  | 61  | 1 | ALVVINPGNPTGQVLTR               | 52d  | 28 |
| FBgn0030478 | 1110.99 | 97  | 2 | DGGIASNWQDIYLTGGASPGIK          | 52d  | 28 |
| FBgn0030478 | 696.34  | 64  | 3 | LLDSPDYPEDVK                    | 52d  | 28 |
| FBgn0030478 | 1112.25 | 66  | 2 | QVAQYIEKRDGGIASNWQDIYLTGGASPGIK | 52d  | 28 |
| FBgn0030478 | 942.57  | 110 | 2 | VLVLADEVYQDNVYDK                | 52d  | 28 |
| FBgn0030478 | 875.39  | 47  | 1 | ALVVINPGNPTGQVLTR               | 56d  | 28 |
| FBgn0030478 | 1110.97 | 91  | 3 | DGGIASNWQDIYLTGGASPGIK          | 56d  | 28 |
| FBgn0030478 | 668.98  | 71  | 1 | GGYMEVLNLDPK                    | 56d  | 28 |
| FBgn0030478 | 1112.36 | 88  | 2 | QVAQYIEKRDGGIASNWQDIYLTGGASPGIK | 56d  | 28 |
| FBgn0030479 | 763.32  | 34  | 1 | NPPGFADFVEFEDR                  | 2d   | 18 |
| FBgn0030554 | 473.84  | 35  | 1 | DISGLDINMGCPK                   | 132d | 18 |
| FBgn0030587 | 1178.8  | 38  | 1 | HNLHILTLARVTRVLIDAATK           | 22d  | 18 |
| FBgn0030593 | 842.68  | 37  | 1 | MGPSTDPTAVVDPQLR                | 2d   | 28 |
| FBgn0030631 | 493.74  | 36  | 1 | LIKEELLK                        | 22d  | 18 |
| FBgn0030631 | 493.58  | 48  | 1 | LIKEELLK                        | 32d  | 28 |
| FBgn0030631 | 493.77  | 46  | 1 | LIKEELLK                        | 46d  | 28 |
| FBgn0030718 | 552     | 62  | 1 | LDDLLNWGR                       | 42d  | 18 |
| FBgn0030720 | 647.97  | 36  | 1 | KSSLLHPEKQK                     | 52d  | 28 |
| FBgn0030724 | 873.98  | 45  | 2 | LTPGTMIEWGNNWAR                 | 42d  | 18 |
| FBgn0030724 | 1020.11 | 70  | 2 | EDLWNDPEYLSLMQER                | 56d  | 28 |
| FBgn0030809 | 915.15  | 36  | 1 | DIACLQIGASLMESNEFLIHVLNR        | 12d  | 28 |
| FBgn0030853 | 1040.17 | 66  | 3 | DTPEDNPNIPFEFTAENK              | 2d   | 18 |
| FBgn0030853 | 693.67  | 44  | 2 | DTPEDNPNIPFEFTAENK              | 42d  | 18 |
| FBgn0030853 | 1040.13 | 76  | 2 | DTPEDNPNIPFEFTAENK              | 62d  | 18 |
| FBgn0030853 | 1040.07 | 53  | 1 | DTPEDNPNIPFEFTAENK              | 82d  | 18 |
| FBgn0030853 | 1040.19 | 49  | 1 | DTPEDNPNIPFEFTAENK              | 102d | 18 |
| FBgn0030853 | 1040.19 | 44  | 1 | DTPEDNPNIPFEFTAENK              | 112d | 18 |
| FBgn0030853 | 1039.8  | 54  | 1 | DTPEDNPNIPFEFTAENK              | 132d | 18 |
| FBgn0030853 | 1040.27 | 37  | 1 | ASDNLFVHRDTPEDNPNIPFEFTAENK     | 2d   | 28 |
| FBgn0030853 | 1040.12 | 54  | 2 | DTPEDNPNIPFEFTAENK              | 2d   | 28 |



|             |         |    |   |                           |      |    |
|-------------|---------|----|---|---------------------------|------|----|
| FBgn0030853 | 1039.98 | 68 | 3 | DTPEDNPNIPEFTAENK         | 12d  | 28 |
| FBgn0030940 | 882.18  | 39 | 1 | KNENFAEAILIILFK           | 42d  | 18 |
| FBgn0030940 | 882.66  | 37 | 1 | KNENFAEAILIILFK           | 82d  | 18 |
| FBgn0030940 | 882.59  | 50 | 1 | KNENFAEAILIILFK           | 102d | 18 |
| FBgn0030940 | 882.31  | 50 | 1 | KNENFAEAILIILFK           | 56d  | 28 |
| FBgn0030989 | 522.71  | 36 | 1 | VWEGRRLK                  | 2d   | 28 |
| FBgn0031021 | 1115.84 | 86 | 2 | ITVPTAVNLSPISGVPEEHIR     | 2d   | 18 |
| FBgn0031021 | 706.97  | 34 | 1 | TALARPEELEQR              | 2d   | 18 |
| FBgn0031021 | 744.02  | 76 | 3 | ITVPTAVNLSPISGVPEEHIR     | 22d  | 18 |
| FBgn0031021 | 1115.47 | 48 | 1 | ITVPTAVNLSPISGVPEEHIR     | 62d  | 18 |
| FBgn0031021 | 1115.61 | 82 | 2 | ITVPTAVNLSPISGVPEEHIR     | 102d | 18 |
| FBgn0031021 | 1115.67 | 73 | 2 | ITVPTAVNLSPISGVPEEHIR     | 112d | 18 |
| FBgn0031021 | 1115.83 | 60 | 1 | ITVPTAVNLSPISGVPEEHIR     | 142d | 18 |
| FBgn0031021 | 1115.7  | 86 | 3 | ITVPTAVNLSPISGVPEEHIR     | 2d   | 28 |
| FBgn0031021 | 707.39  | 41 | 2 | TALARPEELEQR              | 2d   | 28 |
| FBgn0031021 | 1115.57 | 81 | 3 | ITVPTAVNLSPISGVPEEHIR     | 12d  | 28 |
| FBgn0031021 | 707.42  | 55 | 3 | TALARPEELEQR              | 12d  | 28 |
| FBgn0031021 | 743.77  | 61 | 2 | ITVPTAVNLSPISGVPEEHIR     | 22d  | 28 |
| FBgn0031021 | 744.2   | 79 | 1 | ITVPTAVNLSPISGVPEEHIR     | 32d  | 28 |
| FBgn0031021 | 744.22  | 58 | 1 | ITVPTAVNLSPISGVPEEHIR     | 46d  | 28 |
| FBgn0031021 | 744.22  | 39 | 2 | ITVPTAVNLSPISGVPEEHIR     | 52d  | 28 |
| FBgn0031021 | 1115.44 | 74 | 2 | ITVPTAVNLSPISGVPEEHIR     | 56d  | 28 |
| FBgn0031035 | 848.09  | 37 | 1 | SYLHLPPEIVPSTLK           | 2d   | 18 |
| FBgn0031037 | 1257.21 | 90 | 1 | DGVLTVDAPLPALTAGETLIPIAHK | 2d   | 18 |
| FBgn0031037 | 1024.01 | 55 | 2 | EANFFESTSSTTNSALPSR       | 2d   | 18 |
| FBgn0031037 | 812.85  | 34 | 1 | FDVSQYAPEEIVVK            | 2d   | 18 |
| FBgn0031037 | 857.5   | 39 | 1 | LGDFSVIDTEFSNIR           | 2d   | 18 |
| FBgn0031037 | 1126.24 | 66 | 2 | QQNYVSDISSPLIQDEGDNK      | 2d   | 18 |
| FBgn0031037 | 1257.15 | 71 | 2 | DGVLTVDAPLPALTAGETLIPIAHK | 22d  | 18 |
| FBgn0031037 | 857.44  | 71 | 2 | LGDFSVIDTEFSNIR           | 22d  | 18 |
| FBgn0031037 | 1257.14 | 87 | 3 | DGVLTVDAPLPALTAGETLIPIAHK | 42d  | 18 |
| FBgn0031037 | 813.12  | 65 | 1 | FDVSQYAPEEIVVK            | 42d  | 18 |

|             |         |    |   |                           |      |    |
|-------------|---------|----|---|---------------------------|------|----|
| FBgn0031037 | 1256.86 | 74 | 3 | DGVLTVDAPLPALTAGETLIPIAHK | 62d  | 18 |
| FBgn0031037 | 812.82  | 35 | 1 | FDVSQYAPEEIVVK            | 62d  | 18 |
| FBgn0031037 | 857.38  | 54 | 1 | LGDFSVIDTEFSNIR           | 62d  | 18 |
| FBgn0031037 | 1257.01 | 50 | 1 | DGVLTVDAPLPALTAGETLIPIAHK | 82d  | 18 |
| FBgn0031037 | 1256.51 | 45 | 1 | DGVLTVDAPLPALTAGETLIPIAHK | 102d | 18 |
| FBgn0031037 | 857.42  | 53 | 1 | LGDFSVIDTEFSNIR           | 102d | 18 |
| FBgn0031037 | 1125.95 | 52 | 2 | QQNYVSDISSPLIQDEGDNK      | 102d | 18 |
| FBgn0031037 | 1257.41 | 63 | 1 | DGVLTVDAPLPALTAGETLIPIAHK | 112d | 18 |
| FBgn0031037 | 1126.17 | 45 | 1 | QQNYVSDISSPLIQDEGDNK      | 112d | 18 |
| FBgn0031037 | 1257.35 | 62 | 1 | DGVLTVDAPLPALTAGETLIPIAHK | 122d | 18 |
| FBgn0031037 | 857.3   | 67 | 1 | LGDFSVIDTEFSNIR           | 142d | 18 |
| FBgn0031037 | 1126.08 | 57 | 1 | QQNYVSDISSPLIQDEGDNK      | 142d | 18 |
| FBgn0031037 | 1257.16 | 67 | 1 | DGVLTVDAPLPALTAGETLIPIAHK | 2d   | 28 |
| FBgn0031037 | 1024.04 | 38 | 1 | EANFFESTSSTTNSALPSR       | 2d   | 28 |
| FBgn0031037 | 812.8   | 46 | 1 | FDVSQYAPEEIVVK            | 2d   | 28 |
| FBgn0031037 | 857.45  | 72 | 3 | LGDFSVIDTEFSNIR           | 2d   | 28 |
| FBgn0031037 | 1257.18 | 91 | 3 | DGVLTVDAPLPALTAGETLIPIAHK | 12d  | 28 |
| FBgn0031037 | 1023.84 | 68 | 2 | EANFFESTSSTTNSALPSR       | 12d  | 28 |
| FBgn0031037 | 813.07  | 43 | 1 | FDVSQYAPEEIVVK            | 12d  | 28 |
| FBgn0031037 | 857.41  | 74 | 2 | LGDFSVIDTEFSNIR           | 12d  | 28 |
| FBgn0031037 | 1257.35 | 45 | 3 | DGVLTVDAPLPALTAGETLIPIAHK | 22d  | 28 |
| FBgn0031037 | 857.56  | 46 | 1 | LGDFSVIDTEFSNIR           | 22d  | 28 |
| FBgn0031037 | 1126.11 | 70 | 2 | QQNYVSDISSPLIQDEGDNK      | 22d  | 28 |
| FBgn0031037 | 857.6   | 77 | 2 | LGDFSVIDTEFSNIR           | 32d  | 28 |
| FBgn0031037 | 1125.94 | 79 | 1 | QQNYVSDISSPLIQDEGDNK      | 32d  | 28 |
| FBgn0031037 | 813.08  | 36 | 1 | FDVSQYAPEEIVVK            | 36d  | 28 |
| FBgn0031037 | 857.36  | 52 | 2 | LGDFSVIDTEFSNIR           | 36d  | 28 |
| FBgn0031037 | 1126.18 | 84 | 2 | QQNYVSDISSPLIQDEGDNK      | 36d  | 28 |
| FBgn0031037 | 1257.03 | 54 | 2 | DGVLTVDAPLPALTAGETLIPIAHK | 42d  | 28 |
| FBgn0031037 | 812.79  | 38 | 1 | FDVSQYAPEEIVVK            | 42d  | 28 |
| FBgn0031037 | 857.5   | 75 | 2 | LGDFSVIDTEFSNIR           | 42d  | 28 |
| FBgn0031037 | 1126.14 | 91 | 2 | QQNYVSDISSPLIQDEGDNK      | 42d  | 28 |

|             |         |     |   |                           |      |    |
|-------------|---------|-----|---|---------------------------|------|----|
| FBgn0031037 | 857.52  | 80  | 1 | LGDFSVIDTEFSNIR           | 46d  | 28 |
| FBgn0031037 | 1125.97 | 87  | 1 | QQNYVSDISSPLIQDEGDNK      | 46d  | 28 |
| FBgn0031037 | 1023.97 | 57  | 2 | EANFFESTSSTTNSALPSR       | 50d  | 28 |
| FBgn0031037 | 857.4   | 72  | 2 | LGDFSVIDTEFSNIR           | 50d  | 28 |
| FBgn0031037 | 1126.05 | 63  | 1 | QQNYVSDISSPLIQDEGDNK      | 50d  | 28 |
| FBgn0031037 | 857.62  | 57  | 1 | LGDFSVIDTEFSNIR           | 52d  | 28 |
| FBgn0031037 | 1126.14 | 75  | 1 | QQNYVSDISSPLIQDEGDNK      | 52d  | 28 |
| FBgn0031037 | 1257.08 | 78  | 2 | DGVLTVDAPLPALTAGETLIPIAHK | 56d  | 28 |
| FBgn0031037 | 857.58  | 69  | 4 | LGDFSVIDTEFSNIR           | 56d  | 28 |
| FBgn0031078 | 868.51  | 42  | 1 | LRINLYSSLLNCLR            | 82d  | 18 |
| FBgn0031078 | 868.44  | 34  | 1 | LRINLYSSLLNCLR            | 52d  | 28 |
| FBgn0031090 | 659.46  | 52  | 2 | LQIWDTAGQER               | 42d  | 18 |
| FBgn0031090 | 659.21  | 51  | 1 | LQIWDTAGQER               | 62d  | 18 |
| FBgn0031090 | 659.36  | 51  | 1 | LQIWDTAGQER               | 22d  | 28 |
| FBgn0031090 | 659.24  | 53  | 2 | LQIWDTAGQER               | 32d  | 28 |
| FBgn0031092 | 1137.14 | 59  | 1 | LFPDKDSSLTGALAVAELIASK    | 2d   | 18 |
| FBgn0031092 | 967.02  | 38  | 1 | LNLLEDFAQAVAAQLTK         | 2d   | 18 |
| FBgn0031092 | 645.14  | 59  | 1 | LNLLEDFAQAVAAQLTK         | 22d  | 18 |
| FBgn0031092 | 758.58  | 47  | 2 | LFPDKDSSLTGALAVAELIASK    | 42d  | 18 |
| FBgn0031092 | 966.89  | 73  | 3 | LNLLEDFAQAVAAQLTK         | 42d  | 18 |
| FBgn0031092 | 1137.32 | 69  | 5 | LFPDKDSSLTGALAVAELIASK    | 62d  | 18 |
| FBgn0031092 | 758.52  | 47  | 1 | LFPDKDSSLTGALAVAELIASK    | 102d | 18 |
| FBgn0031092 | 967.21  | 89  | 3 | LNLLEDFAQAVAAQLTK         | 132d | 18 |
| FBgn0031092 | 758.57  | 37  | 1 | LFPDKDSSLTGALAVAELIASK    | 2d   | 28 |
| FBgn0031092 | 967.19  | 46  | 1 | LNLLEDFAQAVAAQLTK         | 2d   | 28 |
| FBgn0031092 | 967.06  | 116 | 3 | LNLLEDFAQAVAAQLTK         | 32d  | 28 |
| FBgn0031092 | 758.51  | 39  | 1 | LFPDKDSSLTGALAVAELIASK    | 36d  | 28 |
| FBgn0031092 | 967.1   | 93  | 3 | LNLLEDFAQAVAAQLTK         | 36d  | 28 |
| FBgn0031092 | 758.2   | 47  | 1 | LFPDKDSSLTGALAVAELIASK    | 42d  | 28 |
| FBgn0031092 | 966.91  | 92  | 3 | LNLLEDFAQAVAAQLTK         | 42d  | 28 |
| FBgn0031092 | 645.15  | 42  | 1 | LNLLEDFAQAVAAQLTK         | 46d  | 28 |
| FBgn0031092 | 967.03  | 97  | 2 | LNLLEDFAQAVAAQLTK         | 50d  | 28 |

|             |         |     |   |                       |      |    |
|-------------|---------|-----|---|-----------------------|------|----|
| FBgn0031092 | 967.15  | 115 | 3 | LNLLSEDFAQAVAAQLTK    | 52d  | 28 |
| FBgn0031092 | 967.16  | 75  | 1 | LNLLSEDFAQAVAAQLTK    | 56d  | 28 |
| FBgn0031207 | 1023.96 | 46  | 2 | VTSISPGLVDTELVPDYK    | 42d  | 18 |
| FBgn0031207 | 1024.03 | 43  | 1 | VTSISPGLVDTELVPDYK    | 82d  | 18 |
| FBgn0031207 | 1024.08 | 44  | 1 | VTSISPGLVDTELVPDYK    | 112d | 18 |
| FBgn0031207 | 1024    | 51  | 2 | VTSISPGLVDTELVPDYK    | 142d | 18 |
| FBgn0031207 | 1024.07 | 60  | 2 | VTSISPGLVDTELVPDYK    | 12d  | 28 |
| FBgn0031264 | 1015.88 | 64  | 1 | VEPAITPSAPQPVTAEPPK   | 2d   | 28 |
| FBgn0031306 | 1113.98 | 105 | 2 | DTQLNPADMLALVALVEAGER | 42d  | 18 |
| FBgn0031306 | 1114.06 | 38  | 1 | DTQLNPADMLALVALVEAGER | 112d | 18 |
| FBgn0031306 | 1114.26 | 38  | 1 | DTQLNPADMLALVALVEAGER | 122d | 18 |
| FBgn0031306 | 1114.05 | 86  | 3 | DTQLNPADMLALVALVEAGER | 56d  | 28 |
| FBgn0031347 | 423.62  | 37  | 1 | RVQIIAEALQK           | 52d  | 28 |
| FBgn0031380 | 652.28  | 58  | 2 | NVEYLAESIHK           | 2d   | 18 |
| FBgn0031380 | 1051.37 | 64  | 2 | SLDKEYATIIGIPEFYNK    | 2d   | 18 |
| FBgn0031380 | 686.29  | 34  | 1 | IAAEILNEDLR           | 22d  | 18 |
| FBgn0031380 | 652.35  | 59  | 2 | NVEYLAESIHK           | 22d  | 18 |
| FBgn0031380 | 830.15  | 42  | 1 | EYATIIGIPEFYNK        | 42d  | 18 |
| FBgn0031380 | 652.29  | 55  | 3 | NVEYLAESIHK           | 42d  | 18 |
| FBgn0031380 | 1051.51 | 52  | 2 | SLDKEYATIIGIPEFYNK    | 42d  | 18 |
| FBgn0031380 | 686.51  | 79  | 1 | IAAEILNEDLR           | 62d  | 18 |
| FBgn0031380 | 652.53  | 56  | 2 | NVEYLAESIHK           | 62d  | 18 |
| FBgn0031380 | 1051.67 | 61  | 1 | SLDKEYATIIGIPEFYNK    | 62d  | 18 |
| FBgn0031380 | 1119.25 | 50  | 1 | YYDKDTCALDFGGLIEDLK   | 62d  | 18 |
| FBgn0031380 | 686.48  | 74  | 1 | IAAEILNEDLR           | 82d  | 18 |
| FBgn0031380 | 652.5   | 52  | 1 | NVEYLAESIHK           | 82d  | 18 |
| FBgn0031380 | 1051.71 | 63  | 1 | SLDKEYATIIGIPEFYNK    | 82d  | 18 |
| FBgn0031380 | 1051.7  | 72  | 1 | SLDKEYATIIGIPEFYNK    | 102d | 18 |
| FBgn0031380 | 1118.84 | 42  | 1 | YYDKDTCALDFGGLIEDLK   | 112d | 18 |
| FBgn0031380 | 470.96  | 36  | 1 | NMGLYGER              | 122d | 18 |
| FBgn0031380 | 652.24  | 56  | 1 | NVEYLAESIHK           | 122d | 18 |
| FBgn0031380 | 652.11  | 52  | 1 | NVEYLAESIHK           | 132d | 18 |

|             |         |    |   |                     |      |    |
|-------------|---------|----|---|---------------------|------|----|
| FBgn0031380 | 1051.44 | 55 | 2 | SLDKEYATIIGIPEFYNK  | 132d | 18 |
| FBgn0031380 | 1051.66 | 47 | 1 | SLDKEYATIIGIPEFYNK  | 142d | 18 |
| FBgn0031380 | 652.33  | 54 | 1 | NVEYLAESIHK         | 2d   | 28 |
| FBgn0031380 | 1051.67 | 61 | 1 | SLDKEYATIIGIPEFYNK  | 2d   | 28 |
| FBgn0031380 | 652.22  | 53 | 3 | NVEYLAESIHK         | 12d  | 28 |
| FBgn0031380 | 1051.66 | 66 | 1 | SLDKEYATIIGIPEFYNK  | 12d  | 28 |
| FBgn0031380 | 1118.98 | 87 | 2 | YYDKDTCALDFGGLIEDLK | 12d  | 28 |
| FBgn0031380 | 1051.57 | 43 | 1 | SLDKEYATIIGIPEFYNK  | 22d  | 28 |
| FBgn0031380 | 686.28  | 79 | 3 | IAAEILNNEDLR        | 32d  | 28 |
| FBgn0031380 | 652.54  | 48 | 2 | NVEYLAESIHK         | 32d  | 28 |
| FBgn0031380 | 1051.61 | 72 | 3 | SLDKEYATIIGIPEFYNK  | 32d  | 28 |
| FBgn0031380 | 686.18  | 82 | 4 | IAAEILNNEDLR        | 36d  | 28 |
| FBgn0031380 | 652.24  | 63 | 3 | NVEYLAESIHK         | 36d  | 28 |
| FBgn0031380 | 1051.64 | 87 | 2 | SLDKEYATIIGIPEFYNK  | 36d  | 28 |
| FBgn0031380 | 973.01  | 42 | 1 | TFEADGHDFCLAQSF     | 36d  | 28 |
| FBgn0031380 | 746.35  | 42 | 1 | YYDKDTCALDFGGLIEDLK | 36d  | 28 |
| FBgn0031380 | 864.04  | 49 | 1 | AGAFTVLCSDDEEEAAR   | 42d  | 28 |
| FBgn0031380 | 829.85  | 44 | 1 | EYATIIGIPEFYNK      | 42d  | 28 |
| FBgn0031380 | 686.41  | 53 | 1 | IAAEILNNEDLR        | 42d  | 28 |
| FBgn0031380 | 470.89  | 35 | 1 | NMGLYGER            | 42d  | 28 |
| FBgn0031380 | 652.24  | 59 | 3 | NVEYLAESIHK         | 42d  | 28 |
| FBgn0031380 | 1051.32 | 79 | 3 | SLDKEYATIIGIPEFYNK  | 42d  | 28 |
| FBgn0031380 | 686.44  | 72 | 2 | IAAEILNNEDLR        | 46d  | 28 |
| FBgn0031380 | 470.74  | 34 | 1 | NMGLYGER            | 46d  | 28 |
| FBgn0031380 | 652.51  | 55 | 3 | NVEYLAESIHK         | 46d  | 28 |
| FBgn0031380 | 1051.45 | 66 | 3 | SLDKEYATIIGIPEFYNK  | 46d  | 28 |
| FBgn0031380 | 686.26  | 76 | 3 | IAAEILNNEDLR        | 50d  | 28 |
| FBgn0031380 | 652.32  | 47 | 2 | NVEYLAESIHK         | 50d  | 28 |
| FBgn0031380 | 1051.66 | 73 | 3 | SLDKEYATIIGIPEFYNK  | 50d  | 28 |
| FBgn0031380 | 686.3   | 68 | 1 | IAAEILNNEDLR        | 52d  | 28 |
| FBgn0031380 | 652.4   | 67 | 3 | NVEYLAESIHK         | 52d  | 28 |
| FBgn0031380 | 1051.47 | 66 | 2 | SLDKEYATIIGIPEFYNK  | 52d  | 28 |

|             |         |     |   |                             |      |    |
|-------------|---------|-----|---|-----------------------------|------|----|
| FBgn0031380 | 1118.92 | 61  | 1 | YYDKDTCALDFGGLIEDLK         | 52d  | 28 |
| FBgn0031380 | 756.88  | 54  | 1 | HNVTQAQSIGTGALR             | 56d  | 28 |
| FBgn0031380 | 1154.33 | 38  | 1 | NLYPFIDMAYQGFATGDIDR        | 56d  | 28 |
| FBgn0031380 | 1051.63 | 81  | 2 | SLDKEYATHIIGIPEFYNK         | 56d  | 28 |
| FBgn0031408 | 451.52  | 35  | 1 | HLPVDQGGQDKSK               | 82d  | 18 |
| FBgn0031415 | 706.12  | 64  | 2 | NAAAFSGDSYVSHR              | 82d  | 18 |
| FBgn0031415 | 706.3   | 59  | 1 | NAAAFSGDSYVSHR              | 2d   | 28 |
| FBgn0031418 | 753.47  | 56  | 1 | GQVTLIDFWSPNK               | 122d | 18 |
| FBgn0031451 | 873.69  | 38  | 1 | VLHDKPAKPFLAILGGAK          | 62d  | 18 |
| FBgn0031453 | 739.19  | 95  | 1 | AAAADAAGDAADNGTSK           | 2d   | 18 |
| FBgn0031453 | 739.29  | 97  | 2 | AAAADAAGDAADNGTSK           | 42d  | 18 |
| FBgn0031453 | 672.96  | 79  | 3 | DGEDAADAAAAAPAK             | 42d  | 18 |
| FBgn0031453 | 672.61  | 87  | 3 | DGEDAADAAAAAPAK             | 62d  | 18 |
| FBgn0031453 | 739.12  | 88  | 2 | AAAADAAGDAADNGTSK           | 102d | 18 |
| FBgn0031453 | 672.73  | 83  | 1 | DGEDAADAAAAAPAK             | 102d | 18 |
| FBgn0031453 | 672.88  | 84  | 2 | DGEDAADAAAAAPAK             | 122d | 18 |
| FBgn0031453 | 673.02  | 74  | 2 | DGEDAADAAAAAPAK             | 132d | 18 |
| FBgn0031453 | 739.42  | 106 | 2 | AAAADAAGDAADNGTSK           | 142d | 18 |
| FBgn0031453 | 672.6   | 76  | 1 | DGEDAADAAAAAPAK             | 2d   | 28 |
| FBgn0031453 | 487.95  | 55  | 1 | VAADDVSAVK                  | 2d   | 28 |
| FBgn0031453 | 723.87  | 52  | 1 | VAADDVSAVKDDLK              | 2d   | 28 |
| FBgn0031453 | 723.98  | 66  | 1 | VAADDVSAVKDDLK              | 12d  | 28 |
| FBgn0031453 | 739.21  | 94  | 3 | AAAADAAGDAADNGTSK           | 56d  | 28 |
| FBgn0031453 | 672.63  | 85  | 3 | DGEDAADAAAAAPAK             | 56d  | 28 |
| FBgn0031459 | 713.68  | 75  | 2 | SQTAAASEDTIFGK              | 42d  | 28 |
| FBgn0031490 | 441.69  | 36  | 1 | NAIDLPLK                    | 22d  | 18 |
| FBgn0031497 | 814.94  | 36  | 1 | FQDEIPFVKPAPIDLELAAAEK      | 36d  | 28 |
| FBgn0031500 | 1408.77 | 34  | 1 | RQYSAPAKSVLSGSQTNDQATPPPTSK | 102d | 18 |
| FBgn0031500 | 523.13  | 37  | 1 | SVTQRGGLVK                  | 132d | 18 |
| FBgn0031561 | 620.87  | 51  | 5 | FGTQELCEQK                  | 62d  | 18 |
| FBgn0031561 | 620.59  | 41  | 1 | FGTQELCEQK                  | 52d  | 28 |
| FBgn0031692 | 558.66  | 42  | 1 | AFQMFDTQK                   | 2d   | 18 |

|             |         |    |   |                          |      |    |
|-------------|---------|----|---|--------------------------|------|----|
| FBgn0031692 | 469.12  | 52 | 2 | TGFIETLR                 | 22d  | 18 |
| FBgn0031692 | 558.72  | 36 | 1 | AFQMFDTQK                | 42d  | 18 |
| FBgn0031692 | 469.2   | 54 | 3 | TGFIETLR                 | 42d  | 18 |
| FBgn0031692 | 469.26  | 55 | 2 | TGFIETLR                 | 62d  | 18 |
| FBgn0031692 | 469.37  | 49 | 1 | TGFIETLR                 | 82d  | 18 |
| FBgn0031692 | 558.91  | 38 | 1 | AFQMFDTQK                | 122d | 18 |
| FBgn0031692 | 468.86  | 49 | 1 | TGFIETLR                 | 122d | 18 |
| FBgn0031692 | 558.97  | 43 | 1 | AFQMFDTQK                | 132d | 18 |
| FBgn0031692 | 469.2   | 46 | 2 | TGFIETLR                 | 132d | 18 |
| FBgn0031692 | 469.35  | 46 | 1 | TGFIETLR                 | 142d | 18 |
| FBgn0031692 | 558.57  | 35 | 2 | AFQMFDTQK                | 12d  | 28 |
| FBgn0031692 | 469.12  | 53 | 3 | TGFIETLR                 | 12d  | 28 |
| FBgn0031692 | 558.66  | 36 | 1 | AFQMFDTQK                | 32d  | 28 |
| FBgn0031692 | 469.16  | 55 | 2 | TGFIETLR                 | 36d  | 28 |
| FBgn0031692 | 558.67  | 36 | 3 | AFQMFDTQK                | 46d  | 28 |
| FBgn0031692 | 469.27  | 42 | 1 | TGFIETLR                 | 46d  | 28 |
| FBgn0031692 | 914.56  | 54 | 2 | VNFDGFCSIAAHFLEEEDAEAIQK | 52d  | 28 |
| FBgn0031701 | 999.31  | 65 | 1 | VVLVDGTPAQGGFWLPLVK      | 50d  | 28 |
| FBgn0031701 | 999.09  | 84 | 1 | VVLVDGTPAQGGFWLPLVK      | 56d  | 28 |
| FBgn0031746 | 912.18  | 82 | 1 | SKPNPSPSAPATLLEANK       | 82d  | 18 |
| FBgn0031765 | 825.81  | 35 | 1 | HSLAAGVGLLQQTGLGK        | 62d  | 18 |
| FBgn0031775 | 674.4   | 60 | 2 | ETELVTPSNTQK             | 2d   | 28 |
| FBgn0031809 | 451.84  | 35 | 1 | EGDNVTLR                 | 36d  | 28 |
| FBgn0031817 | 1306.06 | 46 | 1 | FSSVPDSFDQLQLNPGQLADFER  | 2d   | 18 |
| FBgn0031830 | 590.57  | 64 | 1 | AAGNDNPFDMK              | 2d   | 18 |
| FBgn0031830 | 793.51  | 62 | 1 | MMNDPLEHATGIEK           | 2d   | 18 |
| FBgn0031830 | 590.49  | 64 | 2 | AAGNDNPFDMK              | 22d  | 18 |
| FBgn0031830 | 793.64  | 58 | 1 | MMNDPLEHATGIEK           | 22d  | 18 |
| FBgn0031830 | 590.78  | 56 | 1 | AAGNDNPFDMK              | 42d  | 18 |
| FBgn0031830 | 793.6   | 74 | 2 | MMNDPLEHATGIEK           | 42d  | 18 |
| FBgn0031830 | 590.67  | 68 | 1 | AAGNDNPFDMK              | 132d | 18 |
| FBgn0031830 | 590.82  | 49 | 3 | AAGNDNPFDMK              | 2d   | 28 |

|             |        |     |   |                 |     |    |
|-------------|--------|-----|---|-----------------|-----|----|
| FBgn0031830 | 793.74 | 45  | 2 | MMNDPLEHATGIEK  | 2d  | 28 |
| FBgn0031830 | 590.62 | 64  | 3 | AAGNDNPFDMK     | 12d | 28 |
| FBgn0031830 | 793.66 | 81  | 3 | MMNDPLEHATGIEK  | 22d | 28 |
| FBgn0031830 | 590.73 | 64  | 3 | AAGNDNPFDMK     | 32d | 28 |
| FBgn0031830 | 793.67 | 79  | 3 | MMNDPLEHATGIEK  | 32d | 28 |
| FBgn0031830 | 793.76 | 88  | 2 | MMNDPLEHATGIEK  | 36d | 28 |
| FBgn0031830 | 590.52 | 64  | 3 | AAGNDNPFDMK     | 42d | 28 |
| FBgn0031830 | 793.82 | 69  | 3 | MMNDPLEHATGIEK  | 42d | 28 |
| FBgn0031830 | 590.99 | 51  | 2 | AAGNDNPFDMK     | 46d | 28 |
| FBgn0031830 | 794.1  | 66  | 2 | MMNDPLEHATGIEK  | 46d | 28 |
| FBgn0031830 | 590.89 | 74  | 3 | AAGNDNPFDMK     | 50d | 28 |
| FBgn0031830 | 793.69 | 74  | 2 | MMNDPLEHATGIEK  | 50d | 28 |
| FBgn0031830 | 590.75 | 56  | 1 | AAGNDNPFDMK     | 52d | 28 |
| FBgn0031835 | 596.56 | 39  | 1 | GYEESDLKYVDNLR  | 42d | 28 |
| FBgn0031869 | 690.48 | 38  | 1 | VNDLTPKSHLKK    | 22d | 28 |
| FBgn0031885 | 674.79 | 37  | 1 | AEQEAKEAKESK    | 32d | 28 |
| FBgn0031885 | 674.71 | 37  | 2 | AEQEAKEAKESK    | 50d | 28 |
| FBgn0031885 | 674.76 | 36  | 3 | AEQEAKEAKESK    | 52d | 28 |
| FBgn0031907 | 358.7  | 35  | 1 | DTPAALK         | 82d | 18 |
| FBgn0031908 | 827.76 | 110 | 3 | IVYVGDDTTDEDAIK | 2d  | 18 |
| FBgn0031908 | 827.7  | 91  | 3 | IVYVGDDTTDEDAIK | 22d | 18 |
| FBgn0031908 | 827.79 | 87  | 1 | IVYVGDDTTDEDAIK | 62d | 18 |
| FBgn0031908 | 827.84 | 81  | 2 | IVYVGDDTTDEDAIK | 82d | 18 |
| FBgn0031908 | 828.04 | 109 | 3 | IVYVGDDTTDEDAIK | 2d  | 28 |
| FBgn0031908 | 827.61 | 96  | 2 | IVYVGDDTTDEDAIK | 12d | 28 |
| FBgn0031908 | 827.72 | 89  | 2 | IVYVGDDTTDEDAIK | 22d | 28 |
| FBgn0031908 | 827.81 | 76  | 3 | IVYVGDDTTDEDAIK | 32d | 28 |
| FBgn0031908 | 827.79 | 71  | 2 | IVYVGDDTTDEDAIK | 36d | 28 |
| FBgn0031908 | 827.97 | 73  | 3 | IVYVGDDTTDEDAIK | 42d | 28 |
| FBgn0031908 | 828.13 | 59  | 2 | IVYVGDDTTDEDAIK | 46d | 28 |
| FBgn0031908 | 827.76 | 85  | 2 | IVYVGDDTTDEDAIK | 50d | 28 |
| FBgn0031908 | 827.83 | 65  | 3 | IVYVGDDTTDEDAIK | 52d | 28 |



|             |         |    |   |                             |      |    |
|-------------|---------|----|---|-----------------------------|------|----|
| FBgn0031912 | 519.86  | 76 | 2 | AAAKPAAAAPAK                | 112d | 18 |
| FBgn0031912 | 518.04  | 54 | 1 | VSVNDFIIK                   | 112d | 18 |
| FBgn0031912 | 794.74  | 59 | 1 | VPEANSAWMDTVIR              | 132d | 18 |
| FBgn0031912 | 795.4   | 63 | 1 | VPEANSAWMDTVIR              | 12d  | 28 |
| FBgn0031912 | 518.1   | 56 | 3 | VSVNDFIIK                   | 12d  | 28 |
| FBgn0031912 | 795.27  | 72 | 2 | VPEANSAWMDTVIR              | 22d  | 28 |
| FBgn0031912 | 795.54  | 64 | 1 | VPEANSAWMDTVIR              | 32d  | 28 |
| FBgn0031912 | 518.12  | 47 | 2 | VSVNDFIIK                   | 32d  | 28 |
| FBgn0031912 | 795.42  | 73 | 1 | VPEANSAWMDTVIR              | 36d  | 28 |
| FBgn0031912 | 518.12  | 56 | 2 | VSVNDFIIK                   | 36d  | 28 |
| FBgn0031912 | 519.98  | 44 | 1 | AAAKPAAAAPAK                | 42d  | 28 |
| FBgn0031912 | 795.52  | 65 | 5 | VPEANSAWMDTVIR              | 42d  | 28 |
| FBgn0031912 | 518.09  | 41 | 3 | VSVNDFIIK                   | 42d  | 28 |
| FBgn0031912 | 518.11  | 51 | 2 | VSVNDFIIK                   | 46d  | 28 |
| FBgn0031912 | 795.33  | 73 | 1 | VPEANSAWMDTVIR              | 50d  | 28 |
| FBgn0031912 | 518.06  | 40 | 1 | VSVNDFIIK                   | 50d  | 28 |
| FBgn0031912 | 518.5   | 44 | 2 | VSVNDFIIK                   | 52d  | 28 |
| FBgn0031912 | 795.39  | 57 | 1 | VPEANSAWMDTVIR              | 56d  | 28 |
| FBgn0031912 | 518.47  | 39 | 1 | VSVNDFIIK                   | 56d  | 28 |
| FBgn0031913 | 682.98  | 43 | 1 | FLDPSVLPANYK                | 102d | 18 |
| FBgn0031913 | 682.86  | 59 | 3 | FLDPSVLPANYK                | 142d | 18 |
| FBgn0031913 | 682.79  | 43 | 1 | FLDPSVLPANYK                | 2d   | 28 |
| FBgn0031913 | 683.03  | 73 | 1 | FLDPSVLPANYK                | 36d  | 28 |
| FBgn0031926 | 976.08  | 35 | 1 | RMLQLLKELLHKPQATPAGNEPALTR  | 46d  | 28 |
| FBgn0031940 | 1269.63 | 63 | 3 | GAIHTAPLAGHINSATSVNVAPAPGTL | 2d   | 18 |
| FBgn0031940 | 1269.49 | 44 | 1 | GAIHTAPLAGHINSATSVNVAPAPGTL | 22d  | 18 |
| FBgn0031940 | 1269.91 | 44 | 1 | GAIHTAPLAGHINSATSVNVAPAPGTL | 102d | 18 |
| FBgn0031940 | 1269.47 | 65 | 3 | GAIHTAPLAGHINSATSVNVAPAPGTL | 2d   | 28 |
| FBgn0031940 | 1269.86 | 68 | 5 | GAIHTAPLAGHINSATSVNVAPAPGTL | 12d  | 28 |
| FBgn0031940 | 1269.73 | 50 | 1 | GAIHTAPLAGHINSATSVNVAPAPGTL | 22d  | 28 |
| FBgn0031942 | 1332.02 | 68 | 6 | GAVHVAPLPGHVQSAASVNLEPAPGTW | 2d   | 18 |
| FBgn0031942 | 1332.02 | 55 | 5 | GAVHVAPLPGHVQSAASVNLEPAPGTW | 22d  | 18 |

|             |         |    |   |                             |      |    |
|-------------|---------|----|---|-----------------------------|------|----|
| FBgn0031942 | 1332.05 | 53 | 3 | GAVHVAPLPGHVQSAASVNLEPAPGTW | 42d  | 18 |
| FBgn0031942 | 1332.31 | 55 | 3 | GAVHVAPLPGHVQSAASVNLEPAPGTW | 62d  | 18 |
| FBgn0031942 | 1332.09 | 36 | 1 | GAVHVAPLPGHVQSAASVNLEPAPGTW | 82d  | 18 |
| FBgn0031942 | 1332.09 | 53 | 3 | GAVHVAPLPGHVQSAASVNLEPAPGTW | 102d | 18 |
| FBgn0031942 | 1332.13 | 57 | 3 | GAVHVAPLPGHVQSAASVNLEPAPGTW | 112d | 18 |
| FBgn0031942 | 1332.21 | 38 | 2 | GAVHVAPLPGHVQSAASVNLEPAPGTW | 122d | 18 |
| FBgn0031942 | 1332.42 | 53 | 3 | GAVHVAPLPGHVQSAASVNLEPAPGTW | 142d | 18 |
| FBgn0031942 | 1332.18 | 63 | 5 | GAVHVAPLPGHVQSAASVNLEPAPGTW | 2d   | 28 |
| FBgn0031942 | 1332.28 | 56 | 6 | GAVHVAPLPGHVQSAASVNLEPAPGTW | 12d  | 28 |
| FBgn0031942 | 1332.43 | 66 | 5 | GAVHVAPLPGHVQSAASVNLEPAPGTW | 22d  | 28 |
| FBgn0031942 | 1332.01 | 61 | 6 | GAVHVAPLPGHVQSAASVNLEPAPGTW | 32d  | 28 |
| FBgn0031942 | 1331.95 | 56 | 4 | GAVHVAPLPGHVQSAASVNLEPAPGTW | 36d  | 28 |
| FBgn0031942 | 1332.01 | 60 | 6 | GAVHVAPLPGHVQSAASVNLEPAPGTW | 42d  | 28 |
| FBgn0031942 | 1332.05 | 55 | 4 | GAVHVAPLPGHVQSAASVNLEPAPGTW | 46d  | 28 |
| FBgn0031942 | 1332.34 | 55 | 3 | GAVHVAPLPGHVQSAASVNLEPAPGTW | 50d  | 28 |
| FBgn0031942 | 1332.16 | 60 | 3 | GAVHVAPLPGHVQSAASVNLEPAPGTW | 52d  | 28 |
| FBgn0031942 | 1332.41 | 60 | 3 | GAVHVAPLPGHVQSAASVNLEPAPGTW | 56d  | 28 |
| FBgn0031969 | 1259.1  | 35 | 1 | EKPKVDIEWHNNHNASVSFHK       | 122d | 18 |
| FBgn0031987 | 763.87  | 36 | 1 | TPKKLDPNIIFLK               | 62d  | 18 |
| FBgn0032001 | 1116.62 | 66 | 1 | EFQSLDPSIQEIIILAAATEAR      | 102d | 18 |
| FBgn0032001 | 1116.47 | 42 | 1 | EFQSLDPSIQEIIILAAATEAR      | 122d | 18 |
| FBgn0032001 | 744.73  | 38 | 1 | EFQSLDPSIQEIIILAAATEAR      | 142d | 18 |
| FBgn0032001 | 1116.73 | 44 | 1 | EFQSLDPSIQEIIILAAATEAR      | 36d  | 28 |
| FBgn0032001 | 1116.62 | 50 | 2 | EFQSLDPSIQEIIILAAATEAR      | 42d  | 28 |
| FBgn0032001 | 1116.79 | 53 | 1 | EFQSLDPSIQEIIILAAATEAR      | 46d  | 28 |
| FBgn0032001 | 1116.82 | 67 | 1 | EFQSLDPSIQEIIILAAATEAR      | 52d  | 28 |
| FBgn0032001 | 1116.81 | 97 | 3 | EFQSLDPSIQEIIILAAATEAR      | 56d  | 28 |
| FBgn0032050 | 371.39  | 43 | 1 | KEPAPAK                     | 42d  | 18 |
| FBgn0032076 | 953.73  | 39 | 1 | ANVLPPLGSGALAGNPLGIDR       | 42d  | 18 |
| FBgn0032076 | 953.78  | 95 | 3 | ANVLPPLGSGALAGNPLGIDR       | 2d   | 28 |
| FBgn0032114 | 715.41  | 65 | 2 | EEIFGPVQQLIR                | 2d   | 18 |
| FBgn0032114 | 536.1   | 52 | 3 | IYDEFVER                    | 2d   | 18 |

|             |         |    |   |                                  |      |    |
|-------------|---------|----|---|----------------------------------|------|----|
| FBgn0032114 | 1303.26 | 73 | 3 | TVGNPFDLNTEQGPQVNEEQMEK          | 2d   | 18 |
| FBgn0032114 | 1000.08 | 41 | 1 | EAGFPEGVVNVVPGFGTAGAALANHCDVDK   | 22d  | 18 |
| FBgn0032114 | 715.45  | 70 | 5 | EEIFGPVQQLIR                     | 22d  | 18 |
| FBgn0032114 | 536.15  | 37 | 1 | IYDEFVER                         | 22d  | 18 |
| FBgn0032114 | 636.82  | 70 | 3 | LIQLASGNTNLK                     | 22d  | 18 |
| FBgn0032114 | 1303.34 | 73 | 2 | TVGNPFDLNTEQGPQVNEEQMEK          | 22d  | 18 |
| FBgn0032114 | 479.55  | 37 | 1 | YFAGWADK                         | 22d  | 18 |
| FBgn0032114 | 482.18  | 55 | 3 | ANYIVGGLR                        | 42d  | 18 |
| FBgn0032114 | 1000.3  | 36 | 1 | EAGFPEGVVNVVPGFGTAGAALANHCDVDK   | 42d  | 18 |
| FBgn0032114 | 715     | 76 | 3 | EEIFGPVQQLIR                     | 42d  | 18 |
| FBgn0032114 | 1182.77 | 60 | 1 | IFETINPTTAEVIAEIQCADKEDIDIAVQAAR | 42d  | 18 |
| FBgn0032114 | 536.48  | 42 | 2 | IYDEFVER                         | 42d  | 18 |
| FBgn0032114 | 501.77  | 49 | 2 | KLDEVIER                         | 42d  | 18 |
| FBgn0032114 | 1136.71 | 49 | 3 | LVAGGSRPEGLPGYFVQPTVFADVQDDMTIAR | 42d  | 18 |
| FBgn0032114 | 1303.01 | 88 | 3 | TVGNPFDLNTEQGPQVNEEQMEK          | 42d  | 18 |
| FBgn0032114 | 541.85  | 52 | 1 | VAFTGSTDVGK                      | 42d  | 18 |
| FBgn0032114 | 479.62  | 38 | 1 | YFAGWADK                         | 42d  | 18 |
| FBgn0032114 | 482.37  | 46 | 2 | ANYIVGGLR                        | 62d  | 18 |
| FBgn0032114 | 715.37  | 61 | 3 | EEIFGPVQQLIR                     | 62d  | 18 |
| FBgn0032114 | 536.31  | 48 | 3 | IYDEFVER                         | 62d  | 18 |
| FBgn0032114 | 636.94  | 72 | 4 | LIQLASGNTNLK                     | 62d  | 18 |
| FBgn0032114 | 482.14  | 39 | 1 | ANYIVGGLR                        | 82d  | 18 |
| FBgn0032114 | 715.2   | 60 | 3 | EEIFGPVQQLIR                     | 82d  | 18 |
| FBgn0032114 | 536.48  | 48 | 3 | IYDEFVER                         | 82d  | 18 |
| FBgn0032114 | 637.01  | 56 | 3 | LIQLASGNTNLK                     | 82d  | 18 |
| FBgn0032114 | 1303.1  | 79 | 2 | TVGNPFDLNTEQGPQVNEEQMEK          | 82d  | 18 |
| FBgn0032114 | 541.72  | 53 | 2 | VAFTGSTDVGK                      | 82d  | 18 |
| FBgn0032114 | 1000.41 | 45 | 1 | EAGFPEGVVNVVPGFGTAGAALANHCDVDK   | 102d | 18 |
| FBgn0032114 | 715.43  | 73 | 6 | EEIFGPVQQLIR                     | 102d | 18 |
| FBgn0032114 | 536.23  | 50 | 1 | IYDEFVER                         | 102d | 18 |
| FBgn0032114 | 501.91  | 52 | 1 | KLDEVIER                         | 102d | 18 |
| FBgn0032114 | 1303.3  | 97 | 3 | TVGNPFDLNTEQGPQVNEEQMEK          | 102d | 18 |

|             |         |     |   |                                  |      |    |
|-------------|---------|-----|---|----------------------------------|------|----|
| FBgn0032114 | 715.27  | 71  | 5 | EEIFGPVQQLIR                     | 112d | 18 |
| FBgn0032114 | 536.2   | 51  | 2 | IYDEFVER                         | 112d | 18 |
| FBgn0032114 | 1136.58 | 52  | 2 | LVAGGSRPEGLPGYFVQPTVFADVQDDMTIAR | 112d | 18 |
| FBgn0032114 | 1303.29 | 107 | 3 | TVGNPFDLNTEQGPQVNEEQMEK          | 112d | 18 |
| FBgn0032114 | 482.47  | 49  | 2 | ANYIVGGLR                        | 122d | 18 |
| FBgn0032114 | 1000.45 | 34  | 1 | EAGFPEGVVNVVPGFGTAGAALANHCDVDK   | 122d | 18 |
| FBgn0032114 | 715.29  | 71  | 4 | EEIFGPVQQLIR                     | 122d | 18 |
| FBgn0032114 | 536.28  | 51  | 1 | IYDEFVER                         | 122d | 18 |
| FBgn0032114 | 1136.38 | 49  | 1 | LVAGGSRPEGLPGYFVQPTVFADVQDDMTIAR | 122d | 18 |
| FBgn0032114 | 1302.97 | 89  | 3 | TVGNPFDLNTEQGPQVNEEQMEK          | 122d | 18 |
| FBgn0032114 | 715.44  | 66  | 4 | EEIFGPVQQLIR                     | 132d | 18 |
| FBgn0032114 | 536.47  | 51  | 2 | IYDEFVER                         | 132d | 18 |
| FBgn0032114 | 1303.21 | 63  | 2 | TVGNPFDLNTEQGPQVNEEQMEK          | 132d | 18 |
| FBgn0032114 | 715.26  | 63  | 5 | EEIFGPVQQLIR                     | 142d | 18 |
| FBgn0032114 | 536.45  | 48  | 2 | IYDEFVER                         | 142d | 18 |
| FBgn0032114 | 501.52  | 34  | 1 | KLDEVIER                         | 142d | 18 |
| FBgn0032114 | 1303.32 | 72  | 3 | TVGNPFDLNTEQGPQVNEEQMEK          | 142d | 18 |
| FBgn0032114 | 541.58  | 55  | 1 | VAFTGSTDVGK                      | 142d | 18 |
| FBgn0032114 | 715.51  | 81  | 3 | EEIFGPVQQLIR                     | 2d   | 28 |
| FBgn0032114 | 536.11  | 47  | 3 | IYDEFVER                         | 2d   | 28 |
| FBgn0032114 | 636.89  | 66  | 5 | LIQLASGNTNLK                     | 2d   | 28 |
| FBgn0032114 | 1303.3  | 89  | 3 | TVGNPFDLNTEQGPQVNEEQMEK          | 2d   | 28 |
| FBgn0032114 | 541.55  | 74  | 3 | VAFTGSTDVGK                      | 2d   | 28 |
| FBgn0032114 | 479.72  | 39  | 1 | YFAGWADK                         | 2d   | 28 |
| FBgn0032114 | 482.42  | 37  | 1 | ANYIVGGLR                        | 12d  | 28 |
| FBgn0032114 | 715.54  | 75  | 4 | EEIFGPVQQLIR                     | 12d  | 28 |
| FBgn0032114 | 536.14  | 54  | 2 | IYDEFVER                         | 12d  | 28 |
| FBgn0032114 | 636.82  | 65  | 3 | LIQLASGNTNLK                     | 12d  | 28 |
| FBgn0032114 | 1302.97 | 66  | 1 | TVGNPFDLNTEQGPQVNEEQMEK          | 12d  | 28 |
| FBgn0032114 | 541.85  | 49  | 1 | VAFTGSTDVGK                      | 12d  | 28 |
| FBgn0032114 | 1000.52 | 38  | 1 | EAGFPEGVVNVVPGFGTAGAALANHCDVDK   | 22d  | 28 |
| FBgn0032114 | 715.6   | 68  | 3 | EEIFGPVQQLIR                     | 22d  | 28 |

|             |         |    |   |                                  |     |    |
|-------------|---------|----|---|----------------------------------|-----|----|
| FBgn0032114 | 1302.82 | 81 | 3 | TVGNPFDLNTEQGPQVNEEQMEK          | 22d | 28 |
| FBgn0032114 | 479.79  | 40 | 1 | YFAGWADK                         | 22d | 28 |
| FBgn0032114 | 482.23  | 45 | 1 | ANYIVGGLR                        | 32d | 28 |
| FBgn0032114 | 1000.53 | 38 | 2 | EAGFPEGVVNVVPGFGTAGAALANHCDVDK   | 32d | 28 |
| FBgn0032114 | 715.55  | 65 | 5 | EEIFGPVQQLIR                     | 32d | 28 |
| FBgn0032114 | 809.47  | 60 | 3 | ENGEYALSNYTEVK                   | 32d | 28 |
| FBgn0032114 | 536.36  | 64 | 3 | IYDEFVER                         | 32d | 28 |
| FBgn0032114 | 637.04  | 51 | 3 | LIQLASGNTNLK                     | 32d | 28 |
| FBgn0032114 | 1136.63 | 39 | 2 | LVAGGSRPEGLPGYFVQPTVFADVQDDMTIAR | 32d | 28 |
| FBgn0032114 | 1303.01 | 79 | 2 | TVGNPFDLNTEQGPQVNEEQMEK          | 32d | 28 |
| FBgn0032114 | 479.62  | 38 | 1 | YFAGWADK                         | 32d | 28 |
| FBgn0032114 | 482.3   | 34 | 1 | ANYIVGGLR                        | 36d | 28 |
| FBgn0032114 | 1000.54 | 40 | 2 | EAGFPEGVVNVVPGFGTAGAALANHCDVDK   | 36d | 28 |
| FBgn0032114 | 715.56  | 74 | 5 | EEIFGPVQQLIR                     | 36d | 28 |
| FBgn0032114 | 809.29  | 53 | 1 | ENGEYALSNYTEVK                   | 36d | 28 |
| FBgn0032114 | 1182.57 | 53 | 1 | IFETINPTTAEVIAEIQCADKEDIDIAVQAAR | 36d | 28 |
| FBgn0032114 | 536.12  | 46 | 3 | IYDEFVER                         | 36d | 28 |
| FBgn0032114 | 637.1   | 62 | 6 | LIQLASGNTNLK                     | 36d | 28 |
| FBgn0032114 | 1136.72 | 42 | 2 | LVAGGSRPEGLPGYFVQPTVFADVQDDMTIAR | 36d | 28 |
| FBgn0032114 | 1303.16 | 72 | 1 | TVGNPFDLNTEQGPQVNEEQMEK          | 36d | 28 |
| FBgn0032114 | 541.64  | 52 | 2 | VAFTGSTDVGK                      | 36d | 28 |
| FBgn0032114 | 482.28  | 53 | 2 | ANYIVGGLR                        | 42d | 28 |
| FBgn0032114 | 1000.59 | 35 | 2 | EAGFPEGVVNVVPGFGTAGAALANHCDVDK   | 42d | 28 |
| FBgn0032114 | 715.11  | 71 | 6 | EEIFGPVQQLIR                     | 42d | 28 |
| FBgn0032114 | 809.16  | 58 | 4 | ENGEYALSNYTEVK                   | 42d | 28 |
| FBgn0032114 | 536.47  | 47 | 3 | IYDEFVER                         | 42d | 28 |
| FBgn0032114 | 636.68  | 53 | 5 | LIQLASGNTNLK                     | 42d | 28 |
| FBgn0032114 | 1136.68 | 39 | 1 | LVAGGSRPEGLPGYFVQPTVFADVQDDMTIAR | 42d | 28 |
| FBgn0032114 | 1302.92 | 78 | 3 | TVGNPFDLNTEQGPQVNEEQMEK          | 42d | 28 |
| FBgn0032114 | 541.63  | 52 | 1 | VAFTGSTDVGK                      | 42d | 28 |
| FBgn0032114 | 479.64  | 36 | 2 | YFAGWADK                         | 42d | 28 |
| FBgn0032114 | 481.94  | 52 | 1 | ANYIVGGLR                        | 46d | 28 |

|             |         |    |   |                                  |      |    |
|-------------|---------|----|---|----------------------------------|------|----|
| FBgn0032114 | 715.19  | 60 | 3 | EEIFGPVQQLIR                     | 46d  | 28 |
| FBgn0032114 | 536.35  | 47 | 1 | IYDEFVER                         | 46d  | 28 |
| FBgn0032114 | 636.78  | 67 | 3 | LIQLASGNTNLK                     | 46d  | 28 |
| FBgn0032114 | 1136.7  | 58 | 2 | LVAGGSRPEGLPGYFVQPTVFADVQDDMTIAR | 46d  | 28 |
| FBgn0032114 | 1303.08 | 96 | 3 | TVGNPFDLNTEQGPQVNEEQMEK          | 46d  | 28 |
| FBgn0032114 | 479.76  | 37 | 1 | YFAGWADK                         | 46d  | 28 |
| FBgn0032114 | 1000.55 | 50 | 2 | EAGFPEGVVNVVPGFGTAGAALANHCDVVK   | 50d  | 28 |
| FBgn0032114 | 715.4   | 65 | 4 | EEIFGPVQQLIR                     | 50d  | 28 |
| FBgn0032114 | 809.48  | 50 | 3 | ENGEYALSNYTEVK                   | 50d  | 28 |
| FBgn0032114 | 536.3   | 46 | 3 | IYDEFVER                         | 50d  | 28 |
| FBgn0032114 | 636.98  | 63 | 3 | LIQLASGNTNLK                     | 50d  | 28 |
| FBgn0032114 | 1303.02 | 94 | 3 | TVGNPFDLNTEQGPQVNEEQMEK          | 50d  | 28 |
| FBgn0032114 | 541.84  | 44 | 1 | VAFTGSTDVGK                      | 50d  | 28 |
| FBgn0032114 | 479.59  | 39 | 1 | YFAGWADK                         | 50d  | 28 |
| FBgn0032114 | 1000.37 | 45 | 3 | EAGFPEGVVNVVPGFGTAGAALANHCDVVK   | 52d  | 28 |
| FBgn0032114 | 715.34  | 72 | 6 | EEIFGPVQQLIR                     | 52d  | 28 |
| FBgn0032114 | 536.19  | 45 | 1 | IYDEFVER                         | 52d  | 28 |
| FBgn0032114 | 501.82  | 64 | 3 | KLDEVIER                         | 52d  | 28 |
| FBgn0032114 | 1136.73 | 38 | 1 | LVAGGSRPEGLPGYFVQPTVFADVQDDMTIAR | 52d  | 28 |
| FBgn0032114 | 1303.04 | 62 | 1 | TVGNPFDLNTEQGPQVNEEQMEK          | 52d  | 28 |
| FBgn0032114 | 479.62  | 34 | 1 | YFAGWADK                         | 52d  | 28 |
| FBgn0032114 | 1000.47 | 51 | 1 | EAGFPEGVVNVVPGFGTAGAALANHCDVVK   | 56d  | 28 |
| FBgn0032114 | 715.49  | 76 | 5 | EEIFGPVQQLIR                     | 56d  | 28 |
| FBgn0032114 | 1136.66 | 48 | 2 | LVAGGSRPEGLPGYFVQPTVFADVQDDMTIAR | 56d  | 28 |
| FBgn0032114 | 1303.2  | 56 | 3 | TVGNPFDLNTEQGPQVNEEQMEK          | 56d  | 28 |
| FBgn0032160 | 937.62  | 78 | 3 | VGLIDETANNKEEAIEK                | 2d   | 18 |
| FBgn0032160 | 937.24  | 70 | 1 | VGLIDETANNKEEAIEK                | 22d  | 18 |
| FBgn0032160 | 937.42  | 68 | 1 | VGLIDETANNKEEAIEK                | 42d  | 18 |
| FBgn0032160 | 937.45  | 97 | 2 | VGLIDETANNKEEAIEK                | 62d  | 18 |
| FBgn0032160 | 937.4   | 62 | 1 | VGLIDETANNKEEAIEK                | 82d  | 18 |
| FBgn0032160 | 937.46  | 66 | 1 | VGLIDETANNKEEAIEK                | 122d | 18 |
| FBgn0032160 | 937.55  | 66 | 1 | VGLIDETANNKEEAIEK                | 132d | 18 |

|             |         |     |   |                        |      |    |
|-------------|---------|-----|---|------------------------|------|----|
| FBgn0032160 | 937.08  | 79  | 1 | VGLIDETANNKEEAIEK      | 32d  | 28 |
| FBgn0032160 | 937.36  | 107 | 3 | VGLIDETANNKEEAIEK      | 50d  | 28 |
| FBgn0032160 | 937.38  | 106 | 3 | VGLIDETANNKEEAIEK      | 52d  | 28 |
| FBgn0032227 | 496.9   | 36  | 1 | EELSQRGLSEAR           | 82d  | 18 |
| FBgn0032237 | 1116.94 | 53  | 1 | ELQEEKDEALSVLDSNVSNL   | 2d   | 18 |
| FBgn0032237 | 1100.92 | 84  | 3 | NIIIWGNHSSTQYPDAGQAK   | 2d   | 18 |
| FBgn0032237 | 1117.22 | 66  | 2 | ELQEEKDEALSVLDSNVSNL   | 22d  | 18 |
| FBgn0032237 | 626.4   | 64  | 2 | IVSGLTSLDFAK           | 22d  | 18 |
| FBgn0032237 | 1100.96 | 72  | 3 | NIIIWGNHSSTQYPDAGQAK   | 22d  | 18 |
| FBgn0032237 | 1116.91 | 65  | 2 | ELQEEKDEALSVLDSNVSNL   | 42d  | 18 |
| FBgn0032237 | 626.32  | 80  | 2 | IVSGLTSLDFAK           | 42d  | 18 |
| FBgn0032237 | 1100.89 | 89  | 1 | NIIIWGNHSSTQYPDAGQAK   | 42d  | 18 |
| FBgn0032237 | 1117.08 | 64  | 2 | ELQEEKDEALSVLDSNVSNL   | 62d  | 18 |
| FBgn0032237 | 626.36  | 65  | 1 | IVSGLTSLDFAK           | 62d  | 18 |
| FBgn0032237 | 1101.02 | 78  | 1 | NIIIWGNHSSTQYPDAGQAK   | 62d  | 18 |
| FBgn0032237 | 1117.03 | 62  | 2 | ELQEEKDEALSVLDSNVSNL   | 82d  | 18 |
| FBgn0032237 | 1100.89 | 94  | 3 | NIIIWGNHSSTQYPDAGQAK   | 82d  | 18 |
| FBgn0032237 | 1192.73 | 53  | 1 | SVVDAINDNGYLQGSFVETVQK | 82d  | 18 |
| FBgn0032237 | 1117.13 | 56  | 2 | ELQEEKDEALSVLDSNVSNL   | 102d | 18 |
| FBgn0032237 | 1100.86 | 94  | 2 | NIIIWGNHSSTQYPDAGQAK   | 102d | 18 |
| FBgn0032237 | 1192.58 | 85  | 1 | SVVDAINDNGYLQGSFVETVQK | 102d | 18 |
| FBgn0032237 | 1116.86 | 44  | 1 | ELQEEKDEALSVLDSNVSNL   | 112d | 18 |
| FBgn0032237 | 1101.02 | 88  | 2 | NIIIWGNHSSTQYPDAGQAK   | 112d | 18 |
| FBgn0032237 | 1117    | 54  | 1 | ELQEEKDEALSVLDSNVSNL   | 122d | 18 |
| FBgn0032237 | 1100.9  | 79  | 2 | NIIIWGNHSSTQYPDAGQAK   | 122d | 18 |
| FBgn0032237 | 1117.03 | 74  | 2 | ELQEEKDEALSVLDSNVSNL   | 132d | 18 |
| FBgn0032237 | 626.56  | 53  | 1 | IVSGLTSLDFAK           | 132d | 18 |
| FBgn0032237 | 1100.98 | 73  | 3 | NIIIWGNHSSTQYPDAGQAK   | 132d | 18 |
| FBgn0032237 | 1117.19 | 49  | 2 | ELQEEKDEALSVLDSNVSNL   | 142d | 18 |
| FBgn0032237 | 1101.04 | 76  | 1 | NIIIWGNHSSTQYPDAGQAK   | 142d | 18 |
| FBgn0032237 | 1117.08 | 60  | 1 | ELQEEKDEALSVLDSNVSNL   | 2d   | 28 |
| FBgn0032237 | 626.38  | 39  | 1 | IVSGLTSLDFAK           | 2d   | 28 |

|             |         |     |   |                              |      |    |
|-------------|---------|-----|---|------------------------------|------|----|
| FBgn0032237 | 1100.83 | 80  | 2 | NIIIWGNHSSTQYPDAGQAK         | 2d   | 28 |
| FBgn0032237 | 1116.85 | 91  | 2 | ELQEEKDEALSVLDSNVSNL         | 12d  | 28 |
| FBgn0032237 | 626.25  | 55  | 1 | IVSGLTLSDFAK                 | 12d  | 28 |
| FBgn0032237 | 1100.92 | 86  | 3 | NIIIWGNHSSTQYPDAGQAK         | 12d  | 28 |
| FBgn0032237 | 1192.8  | 109 | 2 | SVVD AINDNGYLQGSFVETVQK      | 12d  | 28 |
| FBgn0032237 | 1117.18 | 47  | 1 | ELQEEKDEALSVLDSNVSNL         | 22d  | 28 |
| FBgn0032237 | 1100.91 | 78  | 2 | NIIIWGNHSSTQYPDAGQAK         | 22d  | 28 |
| FBgn0032237 | 1116.93 | 55  | 1 | ELQEEKDEALSVLDSNVSNL         | 32d  | 28 |
| FBgn0032237 | 1100.93 | 87  | 3 | NIIIWGNHSSTQYPDAGQAK         | 32d  | 28 |
| FBgn0032237 | 1117.22 | 50  | 2 | ELQEEKDEALSVLDSNVSNL         | 36d  | 28 |
| FBgn0032237 | 626.45  | 62  | 2 | IVSGLTLSDFAK                 | 36d  | 28 |
| FBgn0032237 | 1117.06 | 67  | 2 | ELQEEKDEALSVLDSNVSNL         | 42d  | 28 |
| FBgn0032237 | 626.21  | 66  | 3 | IVSGLTLSDFAK                 | 42d  | 28 |
| FBgn0032237 | 1100.9  | 67  | 3 | NIIIWGNHSSTQYPDAGQAK         | 42d  | 28 |
| FBgn0032237 | 1117.27 | 62  | 2 | ELQEEKDEALSVLDSNVSNL         | 46d  | 28 |
| FBgn0032237 | 626.08  | 95  | 1 | IVSGLTLSDFAK                 | 46d  | 28 |
| FBgn0032237 | 1117.15 | 36  | 1 | ELQEEKDEALSVLDSNVSNL         | 50d  | 28 |
| FBgn0032237 | 1100.9  | 70  | 1 | NIIIWGNHSSTQYPDAGQAK         | 50d  | 28 |
| FBgn0032237 | 1117.15 | 56  | 4 | ELQEEKDEALSVLDSNVSNL         | 52d  | 28 |
| FBgn0032237 | 1116.84 | 55  | 3 | ELQEEKDEALSVLDSNVSNL         | 56d  | 28 |
| FBgn0032242 | 638.63  | 45  | 1 | FSPLHNVHTPK                  | 12d  | 28 |
| FBgn0032287 | 1257.4  | 60  | 2 | DVSIEFLTPADQSLVAVQGPQVAK     | 82d  | 18 |
| FBgn0032287 | 1257.39 | 52  | 2 | DVSIEFLTPADQSLVAVQGPQVAK     | 112d | 18 |
| FBgn0032287 | 1257.4  | 37  | 1 | DVSIEFLTPADQSLVAVQGPQVAK     | 12d  | 28 |
| FBgn0032287 | 1257.13 | 73  | 1 | DVSIEFLTPADQSLVAVQGPQVAK     | 52d  | 28 |
| FBgn0032299 | 1336.04 | 67  | 3 | DAQIQNVQEGIELGAYEQIPGNQR     | 2d   | 18 |
| FBgn0032299 | 1570.24 | 114 | 2 | INLFEILGDQVPSEVINNLQSQVDQIGR | 2d   | 18 |
| FBgn0032299 | 1336.06 | 60  | 2 | DAQIQNVQEGIELGAYEQIPGNQR     | 62d  | 18 |
| FBgn0032299 | 1570.53 | 46  | 2 | INLFEILGDQVPSEVINNLQSQVDQIGR | 62d  | 18 |
| FBgn0032299 | 1336.22 | 55  | 1 | DAQIQNVQEGIELGAYEQIPGNQR     | 112d | 18 |
| FBgn0032299 | 1336.17 | 60  | 1 | DAQIQNVQEGIELGAYEQIPGNQR     | 122d | 18 |
| FBgn0032299 | 1335.97 | 37  | 1 | DAQIQNVQEGIELGAYEQIPGNQR     | 132d | 18 |



|             |         |     |   |                                      |      |    |
|-------------|---------|-----|---|--------------------------------------|------|----|
| FBgn0032299 | 1336.09 | 53  | 2 | DAQIQNVQEGIELGAYEQIPGNQR             | 12d  | 28 |
| FBgn0032299 | 1570.13 | 55  | 2 | INLFEILGDQVPSEVINNLQSQVDQIGR         | 12d  | 28 |
| FBgn0032336 | 707.48  | 73  | 1 | SPTYGNVNELYR                         | 42d  | 28 |
| FBgn0032350 | 851.04  | 62  | 1 | GGIIDEQAVLDGLES GK                   | 2d   | 18 |
| FBgn0032350 | 851.14  | 97  | 2 | GGIIDEQAVLDGLES GK                   | 22d  | 18 |
| FBgn0032350 | 795.71  | 58  | 1 | VAGAAFDVYPEEPPK                      | 22d  | 18 |
| FBgn0032350 | 851.39  | 63  | 1 | GGIIDEQAVLDGLES GK                   | 42d  | 18 |
| FBgn0032350 | 851.57  | 58  | 1 | GGIIDEQAVLDGLES GK                   | 62d  | 18 |
| FBgn0032350 | 796.13  | 59  | 1 | VAGAAFDVYPEEPPK                      | 62d  | 18 |
| FBgn0032350 | 850.78  | 84  | 1 | GGIIDEQAVLDGLES GK                   | 122d | 18 |
| FBgn0032350 | 851.52  | 67  | 1 | GGIIDEQAVLDGLES GK                   | 2d   | 28 |
| FBgn0032350 | 761.18  | 64  | 1 | IIGYDPITTEAEAK                       | 2d   | 28 |
| FBgn0032350 | 795.91  | 66  | 3 | VAGAAFDVYPEEPPK                      | 2d   | 28 |
| FBgn0032350 | 862.17  | 53  | 1 | VVATPHLGASTSEAQVR                    | 2d   | 28 |
| FBgn0032350 | 761.3   | 56  | 1 | IIGYDPITTEAEAK                       | 12d  | 28 |
| FBgn0032350 | 851.64  | 44  | 2 | GGIIDEQAVLDGLES GK                   | 22d  | 28 |
| FBgn0032350 | 851.44  | 55  | 1 | GGIIDEQAVLDGLES GK                   | 32d  | 28 |
| FBgn0032350 | 761.42  | 76  | 2 | IIGYDPITTEAEAK                       | 32d  | 28 |
| FBgn0032350 | 851.44  | 101 | 3 | GGIIDEQAVLDGLES GK                   | 36d  | 28 |
| FBgn0032350 | 761.36  | 58  | 1 | IIGYDPITTEAEAK                       | 36d  | 28 |
| FBgn0032350 | 795.82  | 63  | 2 | VAGAAFDVYPEEPPK                      | 36d  | 28 |
| FBgn0032350 | 851.62  | 65  | 3 | GGIIDEQAVLDGLES GK                   | 42d  | 28 |
| FBgn0032350 | 761.22  | 51  | 1 | IIGYDPITTEAEAK                       | 42d  | 28 |
| FBgn0032350 | 850.45  | 87  | 1 | GGIIDEQAVLDGLES GK                   | 46d  | 28 |
| FBgn0032350 | 761.32  | 65  | 1 | IIGYDPITTEAEAK                       | 50d  | 28 |
| FBgn0032350 | 1391.41 | 69  | 2 | MTLEEIWPLADYITVHTPLIPATR             | 52d  | 28 |
| FBgn0032350 | 851.51  | 44  | 1 | GGIIDEQAVLDGLES GK                   | 56d  | 28 |
| FBgn0032407 | 1204.11 | 55  | 1 | SGAGDQKEPSASSDVATNAGPEGSEDPDAFFIEQAK | 2d   | 28 |
| FBgn0032407 | 1204.29 | 52  | 2 | SGAGDQKEPSASSDVATNAGPEGSEDPDAFFIEQAK | 12d  | 28 |
| FBgn0032453 | 1453.66 | 50  | 3 | APAQTAVVEYPGDIVVKPGQVLTPTQVK         | 2d   | 18 |
| FBgn0032453 | 1432.65 | 66  | 1 | YALGNPIAGNLYQA EYDDYVPILYK           | 2d   | 18 |
| FBgn0032453 | 1453.98 | 46  | 2 | APAQTAVVEYPGDIVVKPGQVLTPTQVK         | 22d  | 18 |

|             |         |    |   |                              |      |    |
|-------------|---------|----|---|------------------------------|------|----|
| FBgn0032453 | 969.68  | 64 | 1 | APAQTAVVEYPGDIVVKPGQVLTPTQVK | 42d  | 18 |
| FBgn0032453 | 1453.66 | 58 | 2 | APAQTAVVEYPGDIVVKPGQVLTPTQVK | 62d  | 18 |
| FBgn0032453 | 1432.69 | 44 | 1 | YALGNPIAGNLYQAEYDDYVPILYK    | 102d | 18 |
| FBgn0032453 | 1453.68 | 52 | 2 | APAQTAVVEYPGDIVVKPGQVLTPTQVK | 112d | 18 |
| FBgn0032453 | 1432.95 | 34 | 1 | YALGNPIAGNLYQAEYDDYVPILYK    | 112d | 18 |
| FBgn0032453 | 1453.75 | 40 | 2 | APAQTAVVEYPGDIVVKPGQVLTPTQVK | 122d | 18 |
| FBgn0032453 | 969.55  | 53 | 2 | APAQTAVVEYPGDIVVKPGQVLTPTQVK | 132d | 18 |
| FBgn0032453 | 1453.7  | 38 | 1 | APAQTAVVEYPGDIVVKPGQVLTPTQVK | 142d | 18 |
| FBgn0032453 | 1432.9  | 42 | 1 | YALGNPIAGNLYQAEYDDYVPILYK    | 2d   | 28 |
| FBgn0032453 | 1453.66 | 35 | 1 | APAQTAVVEYPGDIVVKPGQVLTPTQVK | 12d  | 28 |
| FBgn0032453 | 1432.64 | 48 | 1 | YALGNPIAGNLYQAEYDDYVPILYK    | 12d  | 28 |
| FBgn0032453 | 1453.73 | 52 | 2 | APAQTAVVEYPGDIVVKPGQVLTPTQVK | 22d  | 28 |
| FBgn0032453 | 969.7   | 61 | 1 | APAQTAVVEYPGDIVVKPGQVLTPTQVK | 32d  | 28 |
| FBgn0032453 | 969.69  | 44 | 1 | APAQTAVVEYPGDIVVKPGQVLTPTQVK | 36d  | 28 |
| FBgn0032453 | 1432.66 | 61 | 1 | YALGNPIAGNLYQAEYDDYVPILYK    | 42d  | 28 |
| FBgn0032453 | 1453.71 | 51 | 1 | APAQTAVVEYPGDIVVKPGQVLTPTQVK | 46d  | 28 |
| FBgn0032453 | 1453.66 | 40 | 1 | APAQTAVVEYPGDIVVKPGQVLTPTQVK | 52d  | 28 |
| FBgn0032505 | 734.23  | 39 | 1 | LTNGVGNEEAEEIINELLSR         | 22d  | 18 |
| FBgn0032505 | 1101.06 | 59 | 1 | LTNGVGNEEAEEIINELLSR         | 42d  | 18 |
| FBgn0032505 | 741.72  | 38 | 2 | WYQWSDAQLER                  | 42d  | 18 |
| FBgn0032505 | 1100.93 | 55 | 2 | LTNGVGNEEAEEIINELLSR         | 12d  | 28 |
| FBgn0032505 | 1101.09 | 55 | 3 | LTNGVGNEEAEEIINELLSR         | 36d  | 28 |
| FBgn0032509 | 998.63  | 41 | 1 | LQFISLNAEQFPEISMK            | 2d   | 18 |
| FBgn0032517 | 640.17  | 42 | 1 | SRQFRFVAVGHLGDLSK            | 22d  | 28 |
| FBgn0032517 | 368.83  | 35 | 1 | FLSQLK                       | 36d  | 28 |
| FBgn0032518 | 628.72  | 62 | 1 | AIVGASLAEILAK                | 2d   | 28 |
| FBgn0032538 | 627.37  | 41 | 1 | VPVPQYPVEK                   | 2d   | 28 |
| FBgn0032621 | 472.12  | 40 | 1 | IQVSFTHL                     | 42d  | 28 |
| FBgn0032650 | 446.32  | 53 | 2 | YDRIGDGGISKR                 | 122d | 18 |
| FBgn0032656 | 369.63  | 38 | 1 | QKFIMRER                     | 22d  | 28 |
| FBgn0032656 | 370     | 38 | 1 | QKFIMRER                     | 42d  | 28 |
| FBgn0032679 | 533.81  | 38 | 1 | YVEELLGDK                    | 22d  | 18 |

|             |         |     |   |                            |      |    |
|-------------|---------|-----|---|----------------------------|------|----|
| FBgn0032686 | 330.53  | 54  | 1 | SGLQVR                     | 2d   | 18 |
| FBgn0032686 | 330.53  | 47  | 2 | SGLQVR                     | 62d  | 18 |
| FBgn0032686 | 330.67  | 47  | 1 | SGLQVR                     | 82d  | 18 |
| FBgn0032686 | 330.78  | 47  | 1 | SGLQVR                     | 12d  | 28 |
| FBgn0032686 | 330.72  | 51  | 3 | SGLQVR                     | 42d  | 28 |
| FBgn0032721 | 1001.14 | 53  | 1 | YLEDLFGGPTVFEPFLR          | 32d  | 28 |
| FBgn0032721 | 1001    | 43  | 1 | YLEDLFGGPTVFEPFLR          | 42d  | 28 |
| FBgn0032721 | 1001.12 | 44  | 1 | YLEDLFGGPTVFEPFLR          | 56d  | 28 |
| FBgn0032729 | 916.31  | 39  | 1 | EIVLRHPSLKVAVLEK           | 12d  | 28 |
| FBgn0032794 | 410.17  | 42  | 1 | YVIALLK                    | 12d  | 28 |
| FBgn0032798 | 436.84  | 41  | 3 | VLLEELR                    | 12d  | 28 |
| FBgn0032820 | 930.86  | 65  | 3 | SATGDLSQLLNSIQTAIK         | 42d  | 18 |
| FBgn0032820 | 931.11  | 102 | 2 | SATGDLSQLLNSIQTAIK         | 82d  | 18 |
| FBgn0032820 | 931.19  | 47  | 1 | SATGDLSQLLNSIQTAIK         | 22d  | 28 |
| FBgn0032820 | 931.18  | 37  | 1 | SATGDLSQLLNSIQTAIK         | 32d  | 28 |
| FBgn0032820 | 931.1   | 49  | 1 | SATGDLSQLLNSIQTAIK         | 36d  | 28 |
| FBgn0032833 | 807.44  | 34  | 1 | IIDLEINPVTGLTSK            | 2d   | 18 |
| FBgn0032833 | 807.61  | 72  | 1 | IIDLEINPVTGLTSK            | 22d  | 18 |
| FBgn0032833 | 730.86  | 37  | 1 | FREPTNEINALR               | 42d  | 18 |
| FBgn0032833 | 807.53  | 46  | 2 | IIDLEINPVTGLTSK            | 42d  | 18 |
| FBgn0032833 | 807.48  | 37  | 1 | IIDLEINPVTGLTSK            | 82d  | 18 |
| FBgn0032833 | 807.65  | 57  | 2 | IIDLEINPVTGLTSK            | 12d  | 28 |
| FBgn0032835 | 1080.46 | 62  | 1 | DADKESPELSGYPSYPTFR        | 2d   | 18 |
| FBgn0032840 | 728.45  | 49  | 1 | SQWYNSSLNSDK               | 122d | 18 |
| FBgn0032889 | 1308.04 | 73  | 2 | GVDGVLWGGHEPLNAEALDAAGPQLK | 2d   | 18 |
| FBgn0032889 | 1308.22 | 43  | 2 | GVDGVLWGGHEPLNAEALDAAGPQLK | 132d | 18 |
| FBgn0032889 | 1308.25 | 52  | 1 | GVDGVLWGGHEPLNAEALDAAGPQLK | 12d  | 28 |
| FBgn0032897 | 704.22  | 52  | 2 | TLESVAGHPQIVR              | 2d   | 28 |
| FBgn0032904 | 517.77  | 37  | 1 | ALFKSELVK                  | 22d  | 28 |
| FBgn0032946 | 799.84  | 71  | 2 | FLWNSETSQCCLGR             | 2d   | 18 |
| FBgn0032946 | 569.41  | 60  | 3 | IGEYYAPPVK                 | 2d   | 18 |
| FBgn0032946 | 570.51  | 37  | 1 | MADKKIGEYYAPPVK            | 2d   | 18 |

|             |        |    |   |                 |      |    |
|-------------|--------|----|---|-----------------|------|----|
| FBgn0032946 | 655.89 | 44 | 2 | TLPDHMPEELK     | 2d   | 18 |
| FBgn0032946 | 528.96 | 37 | 2 | YWVDETSR        | 2d   | 18 |
| FBgn0032946 | 799.87 | 62 | 2 | FLWNSETSQCLGR   | 22d  | 18 |
| FBgn0032946 | 569.54 | 61 | 5 | IGEYYAPPVK      | 22d  | 18 |
| FBgn0032946 | 655.6  | 45 | 2 | TLPDHMPEELK     | 22d  | 18 |
| FBgn0032946 | 528.56 | 34 | 1 | YWVDETSR        | 22d  | 18 |
| FBgn0032946 | 799.79 | 55 | 1 | FLWNSETSQCLGR   | 42d  | 18 |
| FBgn0032946 | 569.16 | 43 | 1 | IGEYYAPPVK      | 42d  | 18 |
| FBgn0032946 | 655.64 | 42 | 3 | TLPDHMPEELK     | 42d  | 18 |
| FBgn0032946 | 799.85 | 50 | 1 | FLWNSETSQCLGR   | 62d  | 18 |
| FBgn0032946 | 569.31 | 47 | 2 | IGEYYAPPVK      | 62d  | 18 |
| FBgn0032946 | 799.8  | 49 | 1 | FLWNSETSQCLGR   | 82d  | 18 |
| FBgn0032946 | 568.77 | 45 | 2 | IGEYYAPPVK      | 82d  | 18 |
| FBgn0032946 | 570.24 | 34 | 1 | MADKKIGEYYAPPVK | 82d  | 18 |
| FBgn0032946 | 655.85 | 39 | 2 | TLPDHMPEELK     | 82d  | 18 |
| FBgn0032946 | 799.12 | 44 | 1 | FLWNSETSQCLGR   | 102d | 18 |
| FBgn0032946 | 570.29 | 37 | 1 | MADKKIGEYYAPPVK | 102d | 18 |
| FBgn0032946 | 655.47 | 41 | 1 | TLPDHMPEELK     | 102d | 18 |
| FBgn0032946 | 799.86 | 62 | 3 | FLWNSETSQCLGR   | 112d | 18 |
| FBgn0032946 | 799.77 | 94 | 2 | FLWNSETSQCLGR   | 122d | 18 |
| FBgn0032946 | 656.01 | 37 | 1 | TLPDHMPEELK     | 122d | 18 |
| FBgn0032946 | 528.99 | 37 | 1 | YWVDETSR        | 122d | 18 |
| FBgn0032946 | 570.29 | 37 | 1 | MADKKIGEYYAPPVK | 132d | 18 |
| FBgn0032946 | 655.96 | 39 | 1 | TLPDHMPEELK     | 132d | 18 |
| FBgn0032946 | 800.09 | 65 | 3 | FLWNSETSQCLGR   | 142d | 18 |
| FBgn0032946 | 569.11 | 61 | 5 | IGEYYAPPVK      | 2d   | 28 |
| FBgn0032946 | 655.65 | 36 | 3 | TLPDHMPEELK     | 2d   | 28 |
| FBgn0032946 | 799.73 | 67 | 3 | FLWNSETSQCLGR   | 12d  | 28 |
| FBgn0032946 | 569.52 | 57 | 4 | IGEYYAPPVK      | 12d  | 28 |
| FBgn0032946 | 570.44 | 37 | 3 | MADKKIGEYYAPPVK | 12d  | 28 |
| FBgn0032946 | 655.82 | 45 | 2 | TLPDHMPEELK     | 12d  | 28 |
| FBgn0032946 | 569.21 | 51 | 1 | IGEYYAPPVK      | 22d  | 28 |

|             |         |     |   |                             |      |    |
|-------------|---------|-----|---|-----------------------------|------|----|
| FBgn0032946 | 569.05  | 61  | 4 | IGEYYAPPVK                  | 32d  | 28 |
| FBgn0032946 | 799.67  | 69  | 1 | FLWNSETSQCLGR               | 36d  | 28 |
| FBgn0032946 | 569.19  | 55  | 3 | IGEYYAPPVK                  | 36d  | 28 |
| FBgn0032946 | 569.49  | 55  | 3 | IGEYYAPPVK                  | 42d  | 28 |
| FBgn0032946 | 799.79  | 78  | 3 | FLWNSETSQCLGR               | 46d  | 28 |
| FBgn0032946 | 569.37  | 47  | 4 | IGEYYAPPVK                  | 46d  | 28 |
| FBgn0032946 | 655.69  | 37  | 2 | TLPDHMPEELK                 | 46d  | 28 |
| FBgn0032946 | 569.34  | 61  | 5 | IGEYYAPPVK                  | 50d  | 28 |
| FBgn0032946 | 655.89  | 39  | 3 | TLPDHMPEELK                 | 50d  | 28 |
| FBgn0032946 | 799.77  | 71  | 2 | FLWNSETSQCLGR               | 52d  | 28 |
| FBgn0032946 | 568.99  | 46  | 2 | IGEYYAPPVK                  | 52d  | 28 |
| FBgn0032946 | 655.6   | 43  | 2 | TLPDHMPEELK                 | 52d  | 28 |
| FBgn0032987 | 820.49  | 114 | 2 | IFNVTQHAVGVIVNK             | 2d   | 18 |
| FBgn0032987 | 820.46  | 84  | 1 | IFNVTQHAVGVIVNK             | 2d   | 28 |
| FBgn0033027 | 870.9   | 57  | 1 | AFDHDGAGSIEHADVSSILEILGQK   | 82d  | 18 |
| FBgn0033027 | 917.64  | 71  | 3 | FIEVEEDVGALQNELK            | 82d  | 18 |
| FBgn0033035 | 976.37  | 38  | 1 | EDGWNTNPFELTEVDGK           | 42d  | 18 |
| FBgn0033035 | 976.32  | 49  | 1 | EDGWNTNPFELTEVDGK           | 112d | 18 |
| FBgn0033035 | 1345.82 | 35  | 1 | SLGAETELADVGQQTLPNGQIPLPK   | 142d | 18 |
| FBgn0033109 | 827.72  | 35  | 1 | TLTEPVVDLVFHQR              | 2d   | 18 |
| FBgn0033109 | 827.37  | 43  | 1 | TLTEPVVDLVFHQR              | 2d   | 28 |
| FBgn0033188 | 1275.06 | 74  | 1 | VIVYPFDETPAGYAELLVVPDLK     | 42d  | 18 |
| FBgn0033188 | 1275.09 | 60  | 3 | VIVYPFDETPAGYAELLVVPDLK     | 62d  | 18 |
| FBgn0033188 | 1274.92 | 63  | 2 | VIVYPFDETPAGYAELLVVPDLK     | 82d  | 18 |
| FBgn0033188 | 1275.41 | 65  | 2 | VIVYPFDETPAGYAELLVVPDLK     | 102d | 18 |
| FBgn0033188 | 1275.33 | 54  | 2 | VIVYPFDETPAGYAELLVVPDLK     | 112d | 18 |
| FBgn0033188 | 1275.28 | 43  | 1 | VIVYPFDETPAGYAELLVVPDLK     | 142d | 18 |
| FBgn0033188 | 1429.43 | 85  | 1 | EGSFFPGFEVAGVIESLGSEITEANNR | 12d  | 28 |
| FBgn0033188 | 1429.02 | 87  | 1 | EGSFFPGFEVAGVIESLGSEITEANNR | 50d  | 28 |
| FBgn0033188 | 1429.38 | 89  | 2 | EGSFFPGFEVAGVIESLGSEITEANNR | 52d  | 28 |
| FBgn0033215 | 528.8   | 37  | 1 | LFDQYKDK                    | 52d  | 28 |
| FBgn0033246 | 1130.16 | 36  | 1 | IIEEAPAIVAQPEVFEDMEK        | 2d   | 18 |

|             |         |    |   |                      |      |    |
|-------------|---------|----|---|----------------------|------|----|
| FBgn0033246 | 936.38  | 73 | 1 | TLQQAGQVWYPDSSYK     | 22d  | 18 |
| FBgn0033246 | 1019.78 | 41 | 2 | DPSPALLELQEVIASISGR  | 42d  | 18 |
| FBgn0033246 | 1130.24 | 65 | 2 | IIEEAPAIVAQPEVFEDMEK | 42d  | 18 |
| FBgn0033246 | 958.74  | 58 | 3 | TVEVEMPADPANLDSEAK   | 42d  | 18 |
| FBgn0033246 | 1019.67 | 42 | 1 | DPSPALLELQEVIASISGR  | 62d  | 18 |
| FBgn0033246 | 1032.49 | 48 | 1 | FLDNSIDTAWLDALIAER   | 62d  | 18 |
| FBgn0033246 | 1019.41 | 74 | 4 | DPSPALLELQEVIASISGR  | 82d  | 18 |
| FBgn0033246 | 1019.72 | 63 | 2 | DPSPALLELQEVIASISGR  | 102d | 18 |
| FBgn0033246 | 1130.17 | 35 | 1 | IIEEAPAIVAQPEVFEDMEK | 102d | 18 |
| FBgn0033246 | 1019.33 | 94 | 3 | DPSPALLELQEVIASISGR  | 2d   | 28 |
| FBgn0033246 | 1129.86 | 64 | 2 | IIEEAPAIVAQPEVFEDMEK | 2d   | 28 |
| FBgn0033246 | 936.11  | 44 | 2 | TLQQAGQVWYPDSSYK     | 2d   | 28 |
| FBgn0033246 | 1032.55 | 47 | 1 | FLDNSIDTAWLDALIAER   | 12d  | 28 |
| FBgn0033246 | 936.44  | 45 | 1 | TLQQAGQVWYPDSSYK     | 32d  | 28 |
| FBgn0033246 | 1019.54 | 37 | 1 | DPSPALLELQEVIASISGR  | 36d  | 28 |
| FBgn0033246 | 1130.3  | 60 | 1 | IIEEAPAIVAQPEVFEDMEK | 36d  | 28 |
| FBgn0033246 | 1019.79 | 49 | 1 | DPSPALLELQEVIASISGR  | 42d  | 28 |
| FBgn0033246 | 1130.3  | 55 | 1 | IIEEAPAIVAQPEVFEDMEK | 42d  | 28 |
| FBgn0033246 | 1019.65 | 54 | 1 | DPSPALLELQEVIASISGR  | 46d  | 28 |
| FBgn0033246 | 936.47  | 70 | 1 | TLQQAGQVWYPDSSYK     | 46d  | 28 |
| FBgn0033250 | 618.45  | 47 | 1 | GLEENLQYLR           | 2d   | 18 |
| FBgn0033268 | 493.11  | 46 | 4 | FDLFDEAK             | 2d   | 18 |
| FBgn0033268 | 794.98  | 91 | 3 | GFKVENLVAQLGQGK      | 2d   | 18 |
| FBgn0033268 | 591.45  | 61 | 2 | NLPLVQAAVQK          | 2d   | 18 |
| FBgn0033268 | 628.98  | 73 | 3 | VENLVAQLGQGK         | 2d   | 18 |
| FBgn0033268 | 814.69  | 62 | 3 | VENLVAQLGQGKEDK      | 2d   | 18 |
| FBgn0033268 | 492.97  | 43 | 2 | FDLFDEAK             | 22d  | 18 |
| FBgn0033268 | 591.2   | 54 | 1 | NLPLVQAAVQK          | 22d  | 18 |
| FBgn0033268 | 679.87  | 40 | 4 | TFDYPDDDITR          | 22d  | 18 |
| FBgn0033268 | 628.75  | 79 | 6 | VENLVAQLGQGK         | 22d  | 18 |
| FBgn0033268 | 493.14  | 36 | 1 | FDLFDEAK             | 42d  | 18 |
| FBgn0033268 | 679.64  | 42 | 2 | TFDYPDDDITR          | 42d  | 18 |

|             |        |    |   |                 |      |    |
|-------------|--------|----|---|-----------------|------|----|
| FBgn0033268 | 814.78 | 63 | 3 | VENLVAQLGQGKEDK | 42d  | 18 |
| FBgn0033268 | 493.29 | 43 | 3 | FDLFDEAK        | 62d  | 18 |
| FBgn0033268 | 496.36 | 66 | 1 | TAEDLQSAR       | 62d  | 18 |
| FBgn0033268 | 815.11 | 65 | 1 | VENLVAQLGQGKEDK | 62d  | 18 |
| FBgn0033268 | 493.29 | 44 | 3 | FDLFDEAK        | 82d  | 18 |
| FBgn0033268 | 591.25 | 42 | 1 | NLPLVQAAVQK     | 82d  | 18 |
| FBgn0033268 | 679.89 | 42 | 2 | TFDYPDDDITR     | 82d  | 18 |
| FBgn0033268 | 628.92 | 75 | 2 | VENLVAQLGQGK    | 82d  | 18 |
| FBgn0033268 | 493.28 | 42 | 2 | FDLFDEAK        | 102d | 18 |
| FBgn0033268 | 493.33 | 42 | 2 | FDLFDEAK        | 112d | 18 |
| FBgn0033268 | 493.19 | 42 | 1 | FDLFDEAK        | 122d | 18 |
| FBgn0033268 | 493.33 | 41 | 1 | FDLFDEAK        | 132d | 18 |
| FBgn0033268 | 679.79 | 42 | 1 | TFDYPDDDITR     | 132d | 18 |
| FBgn0033268 | 493.14 | 39 | 2 | FDLFDEAK        | 2d   | 28 |
| FBgn0033268 | 794.86 | 90 | 2 | GFKVENLVAQLGQGK | 2d   | 28 |
| FBgn0033268 | 591.14 | 67 | 3 | NLPLVQAAVQK     | 2d   | 28 |
| FBgn0033268 | 679.77 | 46 | 2 | TFDYPDDDITR     | 2d   | 28 |
| FBgn0033268 | 628.69 | 80 | 5 | VENLVAQLGQGK    | 2d   | 28 |
| FBgn0033268 | 814.85 | 67 | 3 | VENLVAQLGQGKEDK | 2d   | 28 |
| FBgn0033268 | 493.29 | 40 | 3 | FDLFDEAK        | 12d  | 28 |
| FBgn0033268 | 794.88 | 75 | 1 | GFKVENLVAQLGQGK | 12d  | 28 |
| FBgn0033268 | 679.62 | 46 | 5 | TFDYPDDDITR     | 12d  | 28 |
| FBgn0033268 | 814.83 | 65 | 2 | VENLVAQLGQGKEDK | 12d  | 28 |
| FBgn0033268 | 493.06 | 42 | 2 | FDLFDEAK        | 22d  | 28 |
| FBgn0033268 | 679.82 | 46 | 6 | TFDYPDDDITR     | 22d  | 28 |
| FBgn0033268 | 493.43 | 44 | 3 | FDLFDEAK        | 32d  | 28 |
| FBgn0033268 | 628.82 | 42 | 2 | VENLVAQLGQGK    | 32d  | 28 |
| FBgn0033268 | 493.18 | 42 | 2 | FDLFDEAK        | 36d  | 28 |
| FBgn0033268 | 679.95 | 42 | 2 | TFDYPDDDITR     | 36d  | 28 |
| FBgn0033268 | 628.57 | 63 | 2 | VENLVAQLGQGK    | 36d  | 28 |
| FBgn0033268 | 492.99 | 47 | 3 | FDLFDEAK        | 42d  | 28 |
| FBgn0033268 | 679.73 | 39 | 1 | TFDYPDDDITR     | 42d  | 28 |

|             |         |     |   |                           |      |    |
|-------------|---------|-----|---|---------------------------|------|----|
| FBgn0033268 | 814.88  | 45  | 1 | VENLVAQLGQGKEDK           | 42d  | 28 |
| FBgn0033268 | 493.01  | 46  | 3 | FDLFDEAK                  | 46d  | 28 |
| FBgn0033268 | 679.92  | 36  | 1 | TFDYPDDDDITR              | 46d  | 28 |
| FBgn0033268 | 493.34  | 41  | 1 | FDLFDEAK                  | 50d  | 28 |
| FBgn0033268 | 679.74  | 42  | 3 | TFDYPDDDDITR              | 50d  | 28 |
| FBgn0033268 | 628.65  | 65  | 1 | VENLVAQLGQGK              | 50d  | 28 |
| FBgn0033268 | 814.79  | 41  | 1 | VENLVAQLGQGKEDK           | 50d  | 28 |
| FBgn0033268 | 493.24  | 43  | 2 | FDLFDEAK                  | 52d  | 28 |
| FBgn0033268 | 679.77  | 43  | 2 | TFDYPDDDDITR              | 52d  | 28 |
| FBgn0033273 | 758.2   | 34  | 1 | RSKPAPYVDPEQK             | 122d | 18 |
| FBgn0033342 | 749.3   | 34  | 1 | LGITTAEISDGYEK            | 2d   | 18 |
| FBgn0033367 | 1322.12 | 103 | 3 | VPLDEATGIDTLGNMIESSILSPNR | 2d   | 18 |
| FBgn0033367 | 1322.08 | 66  | 1 | VPLDEATGIDTLGNMIESSILSPNR | 22d  | 18 |
| FBgn0033367 | 1322.08 | 123 | 3 | VPLDEATGIDTLGNMIESSILSPNR | 12d  | 28 |
| FBgn0033385 | 1244.07 | 40  | 3 | EIIGIPEPTPTLPEAPTEDLPEK   | 2d   | 18 |
| FBgn0033385 | 1246.55 | 53  | 1 | EISDAISNPVAFGADLDDEDLER   | 2d   | 18 |
| FBgn0033385 | 1244.33 | 41  | 1 | EIIGIPEPTPTLPEAPTEDLPEK   | 22d  | 18 |
| FBgn0033385 | 1244.35 | 42  | 1 | EIIGIPEPTPTLPEAPTEDLPEK   | 62d  | 18 |
| FBgn0033385 | 1246.52 | 93  | 2 | EISDAISNPVAFGADLDDEDLER   | 62d  | 18 |
| FBgn0033385 | 1244.37 | 37  | 1 | EIIGIPEPTPTLPEAPTEDLPEK   | 82d  | 18 |
| FBgn0033385 | 1244.04 | 69  | 3 | EIIGIPEPTPTLPEAPTEDLPEK   | 102d | 18 |
| FBgn0033385 | 1244.05 | 39  | 1 | EIIGIPEPTPTLPEAPTEDLPEK   | 112d | 18 |
| FBgn0033385 | 1243.98 | 43  | 1 | EIIGIPEPTPTLPEAPTEDLPEK   | 122d | 18 |
| FBgn0033385 | 1244.29 | 36  | 1 | EIIGIPEPTPTLPEAPTEDLPEK   | 142d | 18 |
| FBgn0033385 | 1246.82 | 92  | 2 | EISDAISNPVAFGADLDDEDLER   | 142d | 18 |
| FBgn0033385 | 1244.08 | 36  | 1 | EIIGIPEPTPTLPEAPTEDLPEK   | 2d   | 28 |
| FBgn0033385 | 1243.94 | 52  | 3 | EIIGIPEPTPTLPEAPTEDLPEK   | 12d  | 28 |
| FBgn0033385 | 1244.25 | 43  | 1 | EIIGIPEPTPTLPEAPTEDLPEK   | 22d  | 28 |
| FBgn0033385 | 1244.01 | 55  | 1 | EIIGIPEPTPTLPEAPTEDLPEK   | 36d  | 28 |
| FBgn0033385 | 1244.07 | 50  | 2 | EIIGIPEPTPTLPEAPTEDLPEK   | 42d  | 28 |
| FBgn0033385 | 1244.07 | 56  | 3 | EIIGIPEPTPTLPEAPTEDLPEK   | 46d  | 28 |
| FBgn0033385 | 1244.18 | 58  | 2 | EIIGIPEPTPTLPEAPTEDLPEK   | 50d  | 28 |



|             |         |     |   |                              |      |    |
|-------------|---------|-----|---|------------------------------|------|----|
| FBgn0033385 | 1244.2  | 46  | 2 | EIIGIPEPTPTLPEAPTEDLPEK      | 52d  | 28 |
| FBgn0033385 | 1244.36 | 51  | 3 | EIIGIPEPTPTLPEAPTEDLPEK      | 56d  | 28 |
| FBgn0033398 | 522.87  | 40  | 1 | IKEGAEKLR                    | 142d | 18 |
| FBgn0033408 | 660.77  | 37  | 1 | MSKATTIKEALK                 | 32d  | 28 |
| FBgn0033418 | 886.78  | 90  | 1 | AYLGDLQHQNIDLQR              | 2d   | 28 |
| FBgn0033418 | 886.93  | 73  | 2 | AYLGDLQHQNIDLQR              | 12d  | 28 |
| FBgn0033421 | 544.26  | 34  | 1 | KPEAVLAAGSSGGTSGNK           | 42d  | 28 |
| FBgn0033424 | 658.58  | 35  | 1 | IEEQMSQPKPK                  | 22d  | 28 |
| FBgn0033426 | 723     | 67  | 1 | NVFNEQFGSVFR                 | 142d | 18 |
| FBgn0033427 | 596.3   | 45  | 1 | GCAERSKNLR                   | 112d | 18 |
| FBgn0033427 | 596.25  | 42  | 1 | GCAERSKNLR                   | 122d | 18 |
| FBgn0033427 | 596.44  | 40  | 1 | GCAERSKNLR                   | 142d | 18 |
| FBgn0033435 | 1012.86 | 34  | 1 | NGYTLSIITLPSSESHCVAIGATVGS�K | 2d   | 18 |
| FBgn0033446 | 668.85  | 72  | 2 | LQEANQYVDQK                  | 2d   | 18 |
| FBgn0033446 | 588.65  | 70  | 1 | GEAEQLAASTAK                 | 82d  | 18 |
| FBgn0033446 | 668.77  | 77  | 1 | LQEANQYVDQK                  | 82d  | 18 |
| FBgn0033446 | 588.66  | 62  | 1 | GEAEQLAASTAK                 | 102d | 18 |
| FBgn0033446 | 1129.1  | 57  | 1 | TVQDAAGQAQESAGQQANALLGK      | 112d | 18 |
| FBgn0033446 | 1128.97 | 51  | 1 | TVQDAAGQAQESAGQQANALLGK      | 122d | 18 |
| FBgn0033446 | 668.8   | 62  | 1 | LQEANQYVDQK                  | 132d | 18 |
| FBgn0033446 | 668.72  | 78  | 2 | LQEANQYVDQK                  | 142d | 18 |
| FBgn0033446 | 587.53  | 58  | 1 | EAAALATAEAQK                 | 2d   | 28 |
| FBgn0033446 | 588.42  | 71  | 6 | GEAEQLAASTAK                 | 2d   | 28 |
| FBgn0033446 | 668.93  | 84  | 4 | LQEANQYVDQK                  | 2d   | 28 |
| FBgn0033446 | 894.15  | 85  | 2 | QAVDNTVAQAAVAQNSK            | 2d   | 28 |
| FBgn0033446 | 588.84  | 43  | 1 | GEAEQLAASTAK                 | 12d  | 28 |
| FBgn0033446 | 1129.06 | 106 | 1 | TVQDAAGQAQESAGQQANALLGK      | 12d  | 28 |
| FBgn0033461 | 466.55  | 35  | 1 | DEDTIPNK                     | 22d  | 28 |
| FBgn0033461 | 466.85  | 35  | 1 | DEDTIPNK                     | 32d  | 28 |
| FBgn0033461 | 466.62  | 35  | 1 | DEDTIPNK                     | 36d  | 28 |
| FBgn0033465 | 775.59  | 41  | 1 | NPWLSPFQEFQR                 | 12d  | 28 |
| FBgn0033484 | 831.89  | 49  | 1 | LQSIEDFIIIDETIK              | 82d  | 18 |

|             |         |     |   |                           |      |    |
|-------------|---------|-----|---|---------------------------|------|----|
| FBgn0033484 | 1175.62 | 48  | 1 | EIQPLNAEPAHNELTEQFLR      | 122d | 18 |
| FBgn0033484 | 832.14  | 47  | 1 | LQSIEDFIIIDETIK           | 122d | 18 |
| FBgn0033484 | 832.75  | 70  | 1 | LQSIEDFIIIDETIK           | 142d | 18 |
| FBgn0033504 | 344.93  | 34  | 1 | NSQPSR                    | 32d  | 28 |
| FBgn0033520 | 761.38  | 36  | 1 | LGQTVPNFEADTTK            | 2d   | 18 |
| FBgn0033520 | 792.26  | 52  | 1 | VMILPTVTDEEAHK            | 2d   | 18 |
| FBgn0033520 | 671.97  | 59  | 1 | VVATPANWTPGTK             | 2d   | 18 |
| FBgn0033520 | 761.35  | 35  | 1 | LGQTVPNFEADTTK            | 82d  | 18 |
| FBgn0033520 | 761.28  | 34  | 1 | LGQTVPNFEADTTK            | 132d | 18 |
| FBgn0033520 | 761.49  | 43  | 3 | LGQTVPNFEADTTK            | 2d   | 28 |
| FBgn0033520 | 761.22  | 34  | 1 | LGQTVPNFEADTTK            | 36d  | 28 |
| FBgn0033520 | 671.73  | 35  | 1 | VVATPANWTPGTK             | 42d  | 28 |
| FBgn0033520 | 1156.05 | 44  | 2 | SYCLDIPGDFPYPIIADPTR      | 52d  | 28 |
| FBgn0033608 | 1133.74 | 112 | 1 | SALPQDNALLATLAGLGTGAAIVK  | 2d   | 18 |
| FBgn0033608 | 756.15  | 49  | 1 | SALPQDNALLATLAGLGTGAAIVK  | 42d  | 18 |
| FBgn0033608 | 1133.27 | 60  | 1 | SALPQDNALLATLAGLGTGAAIVK  | 62d  | 18 |
| FBgn0033608 | 1133.84 | 65  | 1 | SALPQDNALLATLAGLGTGAAIVK  | 82d  | 18 |
| FBgn0033608 | 1133.84 | 62  | 1 | SALPQDNALLATLAGLGTGAAIVK  | 122d | 18 |
| FBgn0033608 | 1133.66 | 73  | 1 | SALPQDNALLATLAGLGTGAAIVK  | 132d | 18 |
| FBgn0033608 | 1133.67 | 41  | 1 | SALPQDNALLATLAGLGTGAAIVK  | 142d | 18 |
| FBgn0033608 | 1133.46 | 43  | 1 | SALPQDNALLATLAGLGTGAAIVK  | 12d  | 28 |
| FBgn0033608 | 1133.52 | 56  | 1 | SALPQDNALLATLAGLGTGAAIVK  | 46d  | 28 |
| FBgn0033608 | 1133.71 | 44  | 1 | SALPQDNALLATLAGLGTGAAIVK  | 50d  | 28 |
| FBgn0033608 | 1133.88 | 80  | 1 | SALPQDNALLATLAGLGTGAAIVK  | 56d  | 28 |
| FBgn0033624 | 1237.44 | 47  | 1 | DAEDCTGLTQPIAVNSGSVSGAPVK | 2d   | 18 |
| FBgn0033624 | 1237.55 | 80  | 2 | DAEDCTGLTQPIAVNSGSVSGAPVK | 22d  | 18 |
| FBgn0033624 | 1237.78 | 80  | 3 | DAEDCTGLTQPIAVNSGSVSGAPVK | 62d  | 18 |
| FBgn0033624 | 1237.54 | 76  | 3 | DAEDCTGLTQPIAVNSGSVSGAPVK | 82d  | 18 |
| FBgn0033624 | 1237.53 | 54  | 1 | DAEDCTGLTQPIAVNSGSVSGAPVK | 102d | 18 |
| FBgn0033624 | 1237.6  | 67  | 3 | DAEDCTGLTQPIAVNSGSVSGAPVK | 112d | 18 |
| FBgn0033624 | 1237.78 | 74  | 3 | DAEDCTGLTQPIAVNSGSVSGAPVK | 122d | 18 |
| FBgn0033624 | 1237.83 | 60  | 1 | DAEDCTGLTQPIAVNSGSVSGAPVK | 132d | 18 |

|             |         |    |   |                                  |      |    |
|-------------|---------|----|---|----------------------------------|------|----|
| FBgn0033624 | 1237.76 | 53 | 2 | DAEDCTGLTQPIAVNSGSVSGAPVK        | 142d | 18 |
| FBgn0033624 | 1237.67 | 90 | 1 | DAEDCTGLTQPIAVNSGSVSGAPVK        | 2d   | 28 |
| FBgn0033624 | 1237.53 | 73 | 3 | DAEDCTGLTQPIAVNSGSVSGAPVK        | 12d  | 28 |
| FBgn0033624 | 1237.5  | 44 | 1 | DAEDCTGLTQPIAVNSGSVSGAPVK        | 22d  | 28 |
| FBgn0033624 | 1237.41 | 82 | 3 | DAEDCTGLTQPIAVNSGSVSGAPVK        | 32d  | 28 |
| FBgn0033624 | 1237.42 | 74 | 2 | DAEDCTGLTQPIAVNSGSVSGAPVK        | 36d  | 28 |
| FBgn0033624 | 1237.5  | 37 | 1 | DAEDCTGLTQPIAVNSGSVSGAPVK        | 42d  | 28 |
| FBgn0033624 | 1237.26 | 58 | 1 | DAEDCTGLTQPIAVNSGSVSGAPVK        | 46d  | 28 |
| FBgn0033624 | 1237.39 | 73 | 2 | DAEDCTGLTQPIAVNSGSVSGAPVK        | 50d  | 28 |
| FBgn0033624 | 1237.74 | 60 | 1 | DAEDCTGLTQPIAVNSGSVSGAPVK        | 52d  | 28 |
| FBgn0033624 | 1237.38 | 63 | 2 | DAEDCTGLTQPIAVNSGSVSGAPVK        | 56d  | 28 |
| FBgn0033661 | 925.12  | 36 | 1 | QNLFRLLSALS LQKPV LLEGPPGVGK     | 42d  | 28 |
| FBgn0033663 | 1087.93 | 79 | 3 | YALKDEF SVENLQDFVEK              | 2d   | 18 |
| FBgn0033663 | 692.22  | 37 | 1 | SEPIPESNDAPVK                    | 2d   | 28 |
| FBgn0033663 | 1087.93 | 40 | 1 | YALKDEF SVENLQDFVEK              | 12d  | 28 |
| FBgn0033728 | 1694.36 | 40 | 1 | AEEPIAII SQESNIEPDGSYNYAYETANGIK | 2d   | 18 |
| FBgn0033728 | 667.03  | 68 | 3 | ATSPDSSDVIIAR                    | 2d   | 18 |
| FBgn0033728 | 730.89  | 71 | 1 | KATSPDSSDVIIAR                   | 2d   | 18 |
| FBgn0033728 | 1694.08 | 45 | 1 | AEEPIAII SQESNIEPDGSYNYAYETANGIK | 22d  | 18 |
| FBgn0033728 | 666.84  | 72 | 2 | ATSPDSSDVIIAR                    | 22d  | 18 |
| FBgn0033728 | 667.02  | 79 | 2 | ATSPDSSDVIIAR                    | 42d  | 18 |
| FBgn0033728 | 1694.27 | 57 | 2 | AEEPIAII SQESNIEPDGSYNYAYETANGIK | 62d  | 18 |
| FBgn0033728 | 666.84  | 71 | 3 | ATSPDSSDVIIAR                    | 62d  | 18 |
| FBgn0033728 | 1694.53 | 35 | 1 | AEEPIAII SQESNIEPDGSYNYAYETANGIK | 82d  | 18 |
| FBgn0033728 | 666.97  | 84 | 2 | ATSPDSSDVIIAR                    | 82d  | 18 |
| FBgn0033728 | 666.89  | 79 | 4 | ATSPDSSDVIIAR                    | 102d | 18 |
| FBgn0033728 | 489.33  | 61 | 3 | AEETGTLKK                        | 112d | 18 |
| FBgn0033728 | 666.74  | 73 | 1 | ATSPDSSDVIIAR                    | 112d | 18 |
| FBgn0033728 | 666.74  | 81 | 2 | ATSPDSSDVIIAR                    | 122d | 18 |
| FBgn0033728 | 666.95  | 70 | 1 | ATSPDSSDVIIAR                    | 132d | 18 |
| FBgn0033728 | 666.8   | 89 | 3 | ATSPDSSDVIIAR                    | 142d | 18 |
| FBgn0033728 | 1694.22 | 45 | 2 | AEEPIAII SQESNIEPDGSYNYAYETANGIK | 2d   | 28 |

|             |         |    |   |                                  |      |    |
|-------------|---------|----|---|----------------------------------|------|----|
| FBgn0033728 | 489.28  | 51 | 2 | AEETGTLKK                        | 2d   | 28 |
| FBgn0033728 | 651.34  | 65 | 3 | ALDYLLSLPPAK                     | 2d   | 28 |
| FBgn0033728 | 666.72  | 84 | 7 | ATSPDSSDVIIAR                    | 2d   | 28 |
| FBgn0033728 | 730.79  | 80 | 3 | KATSPDSSDVIIAR                   | 2d   | 28 |
| FBgn0033728 | 666.93  | 72 | 2 | ATSPDSSDVIIAR                    | 12d  | 28 |
| FBgn0033728 | 730.84  | 98 | 3 | KATSPDSSDVIIAR                   | 12d  | 28 |
| FBgn0033728 | 1129.6  | 37 | 2 | AEEPIAIIISQESNIEPDGSYNYAYETANGIK | 22d  | 28 |
| FBgn0033728 | 666.69  | 72 | 2 | ATSPDSSDVIIAR                    | 22d  | 28 |
| FBgn0033728 | 1694.2  | 35 | 1 | AEEPIAIIISQESNIEPDGSYNYAYETANGIK | 32d  | 28 |
| FBgn0033728 | 666.74  | 74 | 3 | ATSPDSSDVIIAR                    | 32d  | 28 |
| FBgn0033728 | 1694.54 | 45 | 2 | AEEPIAIIISQESNIEPDGSYNYAYETANGIK | 36d  | 28 |
| FBgn0033728 | 666.92  | 72 | 3 | ATSPDSSDVIIAR                    | 36d  | 28 |
| FBgn0033728 | 667.03  | 85 | 4 | ATSPDSSDVIIAR                    | 42d  | 28 |
| FBgn0033728 | 1694.27 | 36 | 1 | AEEPIAIIISQESNIEPDGSYNYAYETANGIK | 46d  | 28 |
| FBgn0033728 | 666.18  | 84 | 2 | ATSPDSSDVIIAR                    | 46d  | 28 |
| FBgn0033728 | 666.7   | 76 | 3 | ATSPDSSDVIIAR                    | 50d  | 28 |
| FBgn0033728 | 1694.22 | 38 | 1 | AEEPIAIIISQESNIEPDGSYNYAYETANGIK | 52d  | 28 |
| FBgn0033728 | 667     | 81 | 2 | ATSPDSSDVIIAR                    | 52d  | 28 |
| FBgn0033728 | 667.05  | 90 | 3 | ATSPDSSDVIIAR                    | 56d  | 28 |
| FBgn0033730 | 1092.37 | 42 | 2 | YVADENGFQPEGDHLVPAPQ             | 62d  | 18 |
| FBgn0033730 | 468.98  | 35 | 1 | VENIGYLK                         | 82d  | 18 |
| FBgn0033730 | 1092.48 | 46 | 2 | YVADENGFQPEGDHLVPAPQ             | 82d  | 18 |
| FBgn0033730 | 1092.62 | 51 | 2 | YVADENGFQPEGDHLVPAPQ             | 102d | 18 |
| FBgn0033730 | 1092.55 | 51 | 1 | YVADENGFQPEGDHLVPAPQ             | 112d | 18 |
| FBgn0033730 | 1092.23 | 54 | 2 | YVADENGFQPEGDHLVPAPQ             | 122d | 18 |
| FBgn0033730 | 1092.7  | 34 | 1 | YVADENGFQPEGDHLVPAPQ             | 132d | 18 |
| FBgn0033730 | 1092.45 | 50 | 2 | YVADENGFQPEGDHLVPAPQ             | 142d | 18 |
| FBgn0033730 | 468.82  | 48 | 3 | VENIGYLK                         | 2d   | 28 |
| FBgn0033730 | 1092.36 | 39 | 2 | YVADENGFQPEGDHLVPAPQ             | 2d   | 28 |
| FBgn0033730 | 1092.4  | 43 | 1 | YVADENGFQPEGDHLVPAPQ             | 32d  | 28 |
| FBgn0033730 | 1092.37 | 45 | 2 | YVADENGFQPEGDHLVPAPQ             | 36d  | 28 |
| FBgn0033730 | 1092.74 | 42 | 3 | YVADENGFQPEGDHLVPAPQ             | 42d  | 28 |

|             |         |     |   |                       |      |    |
|-------------|---------|-----|---|-----------------------|------|----|
| FBgn0033730 | 1092.43 | 42  | 2 | YVADENGFQPEGDHLVPVAPQ | 46d  | 28 |
| FBgn0033730 | 1092.51 | 48  | 2 | YVADENGFQPEGDHLVPVAPQ | 50d  | 28 |
| FBgn0033730 | 1092.42 | 42  | 2 | YVADENGFQPEGDHLVPVAPQ | 52d  | 28 |
| FBgn0033730 | 1092.49 | 41  | 1 | YVADENGFQPEGDHLVPVAPQ | 56d  | 28 |
| FBgn0033731 | 1034.94 | 102 | 3 | TEYETGNSIIHEETGFLK    | 2d   | 18 |
| FBgn0033731 | 1034.89 | 58  | 2 | TEYETGNSIIHEETGFLK    | 2d   | 28 |
| FBgn0033835 | 905.3   | 72  | 3 | GEHVYTDEAGNTFVNR      | 2d   | 18 |
| FBgn0033835 | 1146.74 | 50  | 2 | GQNEGTYSVPGVGGQFQNPQR | 2d   | 18 |
| FBgn0033835 | 857.29  | 71  | 3 | NAGGPASHTISGPNFSAK    | 2d   | 18 |
| FBgn0033835 | 857.1   | 89  | 3 | NAGGPASHTISGPNFSAK    | 22d  | 18 |
| FBgn0033835 | 874.49  | 64  | 2 | DDQAGIWDNNVSVWK       | 42d  | 18 |
| FBgn0033835 | 857.38  | 79  | 2 | NAGGPASHTISGPNFSAK    | 42d  | 18 |
| FBgn0033835 | 874.44  | 64  | 2 | DDQAGIWDNNVSVWK       | 62d  | 18 |
| FBgn0033835 | 857.36  | 68  | 2 | NAGGPASHTISGPNFSAK    | 62d  | 18 |
| FBgn0033835 | 857.37  | 76  | 3 | NAGGPASHTISGPNFSAK    | 82d  | 18 |
| FBgn0033835 | 857.64  | 73  | 1 | NAGGPASHTISGPNFSAK    | 112d | 18 |
| FBgn0033835 | 874.42  | 62  | 1 | DDQAGIWDNNVSVWK       | 122d | 18 |
| FBgn0033835 | 857.65  | 89  | 2 | NAGGPASHTISGPNFSAK    | 122d | 18 |
| FBgn0033835 | 1146.55 | 42  | 1 | GQNEGTYSVPGVGGQFQNPQR | 132d | 18 |
| FBgn0033835 | 874.53  | 41  | 1 | DDQAGIWDNNVSVWK       | 142d | 18 |
| FBgn0033835 | 857.58  | 77  | 2 | NAGGPASHTISGPNFSAK    | 142d | 18 |
| FBgn0033835 | 874.41  | 56  | 2 | DDQAGIWDNNVSVWK       | 2d   | 28 |
| FBgn0033835 | 905.28  | 88  | 3 | GEHVYTDEAGNTFVNR      | 2d   | 28 |
| FBgn0033835 | 1146.64 | 49  | 2 | GQNEGTYSVPGVGGQFQNPQR | 2d   | 28 |
| FBgn0033835 | 857.13  | 85  | 3 | NAGGPASHTISGPNFSAK    | 2d   | 28 |
| FBgn0033835 | 679.01  | 70  | 2 | TVDFGNNGGFSQR         | 2d   | 28 |
| FBgn0033835 | 874.38  | 34  | 1 | DDQAGIWDNNVSVWK       | 12d  | 28 |
| FBgn0033835 | 1146.57 | 40  | 1 | GQNEGTYSVPGVGGQFQNPQR | 12d  | 28 |
| FBgn0033835 | 857.38  | 75  | 2 | NAGGPASHTISGPNFSAK    | 12d  | 28 |
| FBgn0033835 | 857.54  | 67  | 3 | NAGGPASHTISGPNFSAK    | 22d  | 28 |
| FBgn0033835 | 872     | 44  | 1 | NGPHVFGSPGNQVYIR      | 22d  | 28 |
| FBgn0033835 | 874.44  | 63  | 2 | DDQAGIWDNNVSVWK       | 32d  | 28 |

|             |         |    |   |                       |      |    |
|-------------|---------|----|---|-----------------------|------|----|
| FBgn0033835 | 857.62  | 83 | 3 | NAGGPASHTISGPNFSAK    | 32d  | 28 |
| FBgn0033835 | 871.89  | 51 | 1 | NGPHVFGSPGNQVYIR      | 32d  | 28 |
| FBgn0033835 | 874.39  | 83 | 2 | DDQAGIWDNNVSVWK       | 36d  | 28 |
| FBgn0033835 | 857.17  | 51 | 1 | NAGGPASHTISGPNFSAK    | 36d  | 28 |
| FBgn0033835 | 874.38  | 68 | 2 | DDQAGIWDNNVSVWK       | 42d  | 28 |
| FBgn0033835 | 857.29  | 87 | 3 | NAGGPASHTISGPNFSAK    | 42d  | 28 |
| FBgn0033835 | 871.89  | 50 | 2 | NGPHVFGSPGNQVYIR      | 42d  | 28 |
| FBgn0033835 | 510.58  | 61 | 1 | VQGENFVAR             | 42d  | 28 |
| FBgn0033835 | 874.6   | 54 | 2 | DDQAGIWDNNVSVWK       | 46d  | 28 |
| FBgn0033835 | 604.11  | 39 | 1 | GEHVYTDEAGNTFVNR      | 46d  | 28 |
| FBgn0033835 | 857.27  | 80 | 3 | NAGGPASHTISGPNFSAK    | 46d  | 28 |
| FBgn0033835 | 874.57  | 55 | 1 | DDQAGIWDNNVSVWK       | 50d  | 28 |
| FBgn0033835 | 905.31  | 73 | 2 | GEHVYTDEAGNTFVNR      | 50d  | 28 |
| FBgn0033835 | 1146.44 | 41 | 1 | GQNEGTYSVPGVGGQFQNPQR | 50d  | 28 |
| FBgn0033835 | 857.26  | 62 | 3 | NAGGPASHTISGPNFSAK    | 50d  | 28 |
| FBgn0033835 | 857.32  | 63 | 3 | NAGGPASHTISGPNFSAK    | 52d  | 28 |
| FBgn0033835 | 874.36  | 53 | 4 | DDQAGIWDNNVSVWK       | 56d  | 28 |
| FBgn0033835 | 857.26  | 69 | 3 | NAGGPASHTISGPNFSAK    | 56d  | 28 |
| FBgn0033865 | 591.43  | 41 | 1 | VIDNVTNLTPVEWDR       | 22d  | 18 |
| FBgn0033879 | 935.91  | 37 | 1 | FGQPEIALGTIPGAGGTQR   | 2d   | 18 |
| FBgn0033879 | 884.49  | 44 | 2 | EAVNTAYETTLQEGLK      | 22d  | 18 |
| FBgn0033879 | 670.46  | 68 | 3 | VVPADQLLGEAVK         | 22d  | 18 |
| FBgn0033879 | 936.1   | 55 | 1 | FGQPEIALGTIPGAGGTQR   | 42d  | 18 |
| FBgn0033879 | 670.61  | 77 | 2 | VVPADQLLGEAVK         | 42d  | 18 |
| FBgn0033879 | 884.38  | 45 | 1 | EAVNTAYETTLQEGLK      | 62d  | 18 |
| FBgn0033879 | 936.2   | 52 | 2 | FGQPEIALGTIPGAGGTQR   | 62d  | 18 |
| FBgn0033879 | 670.42  | 76 | 2 | VVPADQLLGEAVK         | 62d  | 18 |
| FBgn0033879 | 884.57  | 83 | 2 | EAVNTAYETTLQEGLK      | 82d  | 18 |
| FBgn0033879 | 935.98  | 69 | 1 | FGQPEIALGTIPGAGGTQR   | 82d  | 18 |
| FBgn0033879 | 670.55  | 65 | 3 | VVPADQLLGEAVK         | 82d  | 18 |
| FBgn0033879 | 936.16  | 58 | 2 | FGQPEIALGTIPGAGGTQR   | 102d | 18 |
| FBgn0033879 | 670.16  | 75 | 2 | VVPADQLLGEAVK         | 102d | 18 |

|             |        |    |   |                     |      |    |
|-------------|--------|----|---|---------------------|------|----|
| FBgn0033879 | 670.45 | 46 | 2 | VVPADQLLGEAVK       | 112d | 18 |
| FBgn0033879 | 884.38 | 40 | 1 | EAVNTAYETTLQEGLK    | 122d | 18 |
| FBgn0033879 | 936.19 | 52 | 1 | FGQPEIALGTIPGAGGTQR | 122d | 18 |
| FBgn0033879 | 670.18 | 42 | 1 | VVPADQLLGEAVK       | 122d | 18 |
| FBgn0033879 | 935.94 | 50 | 1 | FGQPEIALGTIPGAGGTQR | 132d | 18 |
| FBgn0033879 | 936.11 | 62 | 3 | FGQPEIALGTIPGAGGTQR | 142d | 18 |
| FBgn0033879 | 670.42 | 63 | 3 | VVPADQLLGEAVK       | 142d | 18 |
| FBgn0033879 | 884.36 | 54 | 1 | EAVNTAYETTLQEGLK    | 2d   | 28 |
| FBgn0033879 | 936.21 | 46 | 1 | FGQPEIALGTIPGAGGTQR | 2d   | 28 |
| FBgn0033879 | 670.38 | 74 | 2 | VVPADQLLGEAVK       | 2d   | 28 |
| FBgn0033879 | 884.36 | 68 | 2 | EAVNTAYETTLQEGLK    | 12d  | 28 |
| FBgn0033879 | 935.95 | 54 | 2 | FGQPEIALGTIPGAGGTQR | 12d  | 28 |
| FBgn0033879 | 884.58 | 78 | 3 | EAVNTAYETTLQEGLK    | 22d  | 28 |
| FBgn0033879 | 936.24 | 59 | 3 | FGQPEIALGTIPGAGGTQR | 22d  | 28 |
| FBgn0033879 | 670.25 | 66 | 2 | VVPADQLLGEAVK       | 22d  | 28 |
| FBgn0033879 | 884.43 | 54 | 2 | EAVNTAYETTLQEGLK    | 32d  | 28 |
| FBgn0033879 | 936.14 | 58 | 3 | FGQPEIALGTIPGAGGTQR | 32d  | 28 |
| FBgn0033879 | 670.5  | 74 | 2 | VVPADQLLGEAVK       | 32d  | 28 |
| FBgn0033879 | 884.2  | 69 | 1 | EAVNTAYETTLQEGLK    | 36d  | 28 |
| FBgn0033879 | 935.93 | 62 | 2 | FGQPEIALGTIPGAGGTQR | 36d  | 28 |
| FBgn0033879 | 670.25 | 68 | 1 | VVPADQLLGEAVK       | 36d  | 28 |
| FBgn0033879 | 884.63 | 71 | 2 | EAVNTAYETTLQEGLK    | 42d  | 28 |
| FBgn0033879 | 935.8  | 67 | 2 | FGQPEIALGTIPGAGGTQR | 42d  | 28 |
| FBgn0033879 | 670.58 | 56 | 3 | VVPADQLLGEAVK       | 42d  | 28 |
| FBgn0033879 | 884.64 | 75 | 2 | EAVNTAYETTLQEGLK    | 46d  | 28 |
| FBgn0033879 | 670.38 | 77 | 3 | VVPADQLLGEAVK       | 46d  | 28 |
| FBgn0033879 | 884.43 | 77 | 3 | EAVNTAYETTLQEGLK    | 50d  | 28 |
| FBgn0033879 | 936.22 | 68 | 3 | FGQPEIALGTIPGAGGTQR | 50d  | 28 |
| FBgn0033879 | 670.51 | 75 | 3 | VVPADQLLGEAVK       | 50d  | 28 |
| FBgn0033879 | 884.42 | 81 | 2 | EAVNTAYETTLQEGLK    | 52d  | 28 |
| FBgn0033879 | 936.01 | 48 | 1 | FGQPEIALGTIPGAGGTQR | 52d  | 28 |
| FBgn0033879 | 670.17 | 74 | 2 | VVPADQLLGEAVK       | 52d  | 28 |

|             |         |     |   |                        |      |    |
|-------------|---------|-----|---|------------------------|------|----|
| FBgn0033879 | 936.06  | 69  | 3 | FGQPEIALGTIPGAGGTQR    | 56d  | 28 |
| FBgn0033879 | 669.98  | 80  | 2 | VVPADQQLGEAVK          | 56d  | 28 |
| FBgn0033881 | 394.76  | 36  | 1 | KSLNAVR                | 82d  | 18 |
| FBgn0033883 | 875.55  | 98  | 1 | ILAAPINPADINTIQGK      | 56d  | 28 |
| FBgn0033914 | 536.16  | 34  | 1 | NLIEVGLSVK             | 22d  | 28 |
| FBgn0033919 | 964.35  | 37  | 1 | SPDQNIDQLDALLEDLK      | 32d  | 28 |
| FBgn0033919 | 964.57  | 58  | 1 | SPDQNIDQLDALLEDLK      | 50d  | 28 |
| FBgn0033920 | 598.74  | 34  | 1 | LQNNGISQPPK            | 32d  | 28 |
| FBgn0033926 | 954.95  | 82  | 1 | DHDVVEEFIGNIETYK       | 52d  | 28 |
| FBgn0033926 | 955.08  | 73  | 1 | DHDVVEEFIGNIETYK       | 56d  | 28 |
| FBgn0033958 | 974     | 48  | 2 | VDVEATGEVDPNLYPEAK     | 42d  | 18 |
| FBgn0033958 | 973.84  | 38  | 2 | VDVEATGEVDPNLYPEAK     | 32d  | 28 |
| FBgn0033958 | 973.89  | 43  | 1 | VDVEATGEVDPNLYPEAK     | 42d  | 28 |
| FBgn0033980 | 800.22  | 48  | 3 | DDPLSANLVNIDGQK        | 42d  | 18 |
| FBgn0033980 | 917.09  | 42  | 1 | YFKRMVVVTDIDFAK        | 42d  | 18 |
| FBgn0034079 | 689.71  | 57  | 3 | AFGVQTISGTGALR         | 22d  | 18 |
| FBgn0034079 | 689.85  | 53  | 1 | AFGVQTISGTGALR         | 122d | 18 |
| FBgn0034079 | 689.93  | 67  | 1 | AFGVQTISGTGALR         | 12d  | 28 |
| FBgn0034079 | 689.88  | 52  | 1 | AFGVQTISGTGALR         | 36d  | 28 |
| FBgn0034079 | 689.73  | 54  | 1 | AFGVQTISGTGALR         | 50d  | 28 |
| FBgn0034079 | 689.95  | 35  | 1 | AFGVQTISGTGALR         | 52d  | 28 |
| FBgn0034104 | 585.79  | 36  | 1 | HPGTQKVEFK             | 32d  | 28 |
| FBgn0034112 | 590.14  | 36  | 1 | SATPQTDFLAK            | 2d   | 18 |
| FBgn0034137 | 849.26  | 36  | 1 | LFKLLTSNAQRMFK         | 52d  | 28 |
| FBgn0034138 | 846.81  | 48  | 1 | GVDLDQLLDMPNNQLVELMHSR | 42d  | 18 |
| FBgn0034138 | 445.4   | 34  | 1 | HGRPGIGATHSSR          | 112d | 18 |
| FBgn0034138 | 676.26  | 42  | 1 | EAPPNEKPEIVK           | 2d   | 28 |
| FBgn0034166 | 389.31  | 34  | 1 | DAFLRR                 | 36d  | 28 |
| FBgn0034229 | 976.58  | 63  | 2 | VGGALQNVAGAVQNAVGNIAK  | 22d  | 18 |
| FBgn0034229 | 651.49  | 64  | 3 | VGGALQNVAGAVQNAVGNIAK  | 42d  | 18 |
| FBgn0034229 | 1026.12 | 113 | 2 | VPLLSNVQDFGDFLSQSGK    | 62d  | 18 |
| FBgn0034229 | 771.58  | 69  | 1 | GVSQEGAYPYIDNK         | 82d  | 18 |



|             |         |     |   |                           |      |    |
|-------------|---------|-----|---|---------------------------|------|----|
| FBgn0034229 | 926.78  | 42  | 1 | LVNLPKPIPDADFWR           | 82d  | 18 |
| FBgn0034229 | 976.57  | 84  | 2 | VGGALQNVAGAVQNAVGNIAK     | 82d  | 18 |
| FBgn0034229 | 1026.44 | 107 | 3 | VPLLSNVQDFGDFLSQSGK       | 82d  | 18 |
| FBgn0034229 | 927.1   | 36  | 1 | LVNLPKPIPDADFWR           | 102d | 18 |
| FBgn0034229 | 976.7   | 65  | 1 | VGGALQNVAGAVQNAVGNIAK     | 102d | 18 |
| FBgn0034229 | 976.66  | 36  | 1 | VGGALQNVAGAVQNAVGNIAK     | 122d | 18 |
| FBgn0034229 | 938.14  | 86  | 1 | NLVEAGNAAFAQGVHTFK        | 2d   | 28 |
| FBgn0034229 | 651.29  | 57  | 2 | VGGALQNVAGAVQNAVGNIAK     | 2d   | 28 |
| FBgn0034229 | 927.23  | 65  | 1 | LVNLPKPIPDADFWR           | 12d  | 28 |
| FBgn0034229 | 976.72  | 64  | 2 | VGGALQNVAGAVQNAVGNIAK     | 12d  | 28 |
| FBgn0034229 | 1026.62 | 91  | 1 | VPLLSNVQDFGDFLSQSGK       | 12d  | 28 |
| FBgn0034229 | 976.59  | 96  | 2 | VGGALQNVAGAVQNAVGNIAK     | 22d  | 28 |
| FBgn0034229 | 976.63  | 49  | 2 | VGGALQNVAGAVQNAVGNIAK     | 36d  | 28 |
| FBgn0034229 | 651.53  | 41  | 1 | VGGALQNVAGAVQNAVGNIAK     | 42d  | 28 |
| FBgn0034229 | 976.66  | 57  | 1 | VGGALQNVAGAVQNAVGNIAK     | 46d  | 28 |
| FBgn0034229 | 976.74  | 62  | 1 | VGGALQNVAGAVQNAVGNIAK     | 50d  | 28 |
| FBgn0034229 | 976.69  | 98  | 2 | VGGALQNVAGAVQNAVGNIAK     | 56d  | 28 |
| FBgn0034237 | 1362.97 | 36  | 1 | EIPVDSVEIRELILAFAWEPVGNK  | 142d | 18 |
| FBgn0034245 | 690.97  | 41  | 3 | LVLQYVPIYGSK              | 42d  | 18 |
| FBgn0034245 | 690.68  | 46  | 1 | LVLQYVPIYGSK              | 62d  | 18 |
| FBgn0034245 | 690.85  | 50  | 1 | LVLQYVPIYGSK              | 132d | 18 |
| FBgn0034245 | 690.86  | 36  | 1 | LVLQYVPIYGSK              | 12d  | 28 |
| FBgn0034245 | 691.15  | 42  | 1 | LVLQYVPIYGSK              | 32d  | 28 |
| FBgn0034251 | 466.9   | 34  | 1 | FPINENAK                  | 50d  | 28 |
| FBgn0034259 | 652.68  | 35  | 2 | SKPQFEVDIIK               | 82d  | 18 |
| FBgn0034259 | 652.62  | 37  | 1 | SKPQFEVDIIK               | 42d  | 28 |
| FBgn0034276 | 757.8   | 48  | 1 | LATVGSALGIENQVLSPEDTQK    | 42d  | 18 |
| FBgn0034315 | 1028.13 | 78  | 3 | DLSVNPQTGQPVINETVDK       | 2d   | 18 |
| FBgn0034315 | 1028.03 | 70  | 2 | DLSVNPQTGQPVINETVDK       | 82d  | 18 |
| FBgn0034315 | 1027.93 | 82  | 3 | DLSVNPQTGQPVINETVDK       | 2d   | 28 |
| FBgn0034315 | 1028.16 | 67  | 1 | DLSVNPQTGQPVINETVDK       | 12d  | 28 |
| FBgn0034331 | 1191.29 | 69  | 3 | GGGGWAGSGITTIDSSGYPGGTLVR | 2d   | 18 |

|             |         |     |   |                           |      |    |
|-------------|---------|-----|---|---------------------------|------|----|
| FBgn0034331 | 1191.07 | 57  | 2 | GGGGWAGSGITTIDSSGYPGGTLVR | 112d | 18 |
| FBgn0034331 | 1191.27 | 87  | 2 | GGGGWAGSGITTIDSSGYPGGTLVR | 142d | 18 |
| FBgn0034331 | 1191.07 | 87  | 3 | GGGGWAGSGITTIDSSGYPGGTLVR | 2d   | 28 |
| FBgn0034331 | 1190.94 | 53  | 2 | GGGGWAGSGITTIDSSGYPGGTLVR | 12d  | 28 |
| FBgn0034331 | 1191.11 | 51  | 1 | GGGGWAGSGITTIDSSGYPGGTLVR | 22d  | 28 |
| FBgn0034331 | 1190.89 | 71  | 2 | GGGGWAGSGITTIDSSGYPGGTLVR | 32d  | 28 |
| FBgn0034331 | 1191.22 | 57  | 2 | GGGGWAGSGITTIDSSGYPGGTLVR | 36d  | 28 |
| FBgn0034331 | 1190.92 | 65  | 3 | GGGGWAGSGITTIDSSGYPGGTLVR | 42d  | 28 |
| FBgn0034331 | 1190.97 | 69  | 3 | GGGGWAGSGITTIDSSGYPGGTLVR | 46d  | 28 |
| FBgn0034331 | 1191.04 | 72  | 3 | GGGGWAGSGITTIDSSGYPGGTLVR | 50d  | 28 |
| FBgn0034331 | 1191.31 | 75  | 2 | GGGGWAGSGITTIDSSGYPGGTLVR | 52d  | 28 |
| FBgn0034331 | 1190.97 | 44  | 1 | GGGGWAGSGITTIDSSGYPGGTLVR | 56d  | 28 |
| FBgn0034356 | 1209.34 | 100 | 2 | NSLNLDLENIDLDQLFDLPK      | 2d   | 18 |
| FBgn0034356 | 1208.95 | 65  | 2 | NSLNLDLENIDLDQLFDLPK      | 62d  | 18 |
| FBgn0034356 | 1208.9  | 104 | 2 | NSLNLDLENIDLDQLFDLPK      | 12d  | 28 |
| FBgn0034356 | 655.41  | 37  | 1 | FLWPGFGENSR               | 22d  | 28 |
| FBgn0034356 | 1189.81 | 61  | 1 | NSVFTNVASTDGGVYWEGMEK     | 36d  | 28 |
| FBgn0034356 | 1208.9  | 89  | 2 | NSLNLDLENIDLDQLFDLPK      | 42d  | 28 |
| FBgn0034356 | 891.61  | 41  | 1 | IGIEITDSPYVVESMK          | 46d  | 28 |
| FBgn0034356 | 1209.2  | 45  | 1 | NSLNLDLENIDLDQLFDLPK      | 46d  | 28 |
| FBgn0034356 | 954.57  | 49  | 1 | AGNPVLNYLQSGDQFVK         | 50d  | 28 |
| FBgn0034356 | 1209.17 | 61  | 1 | NSLNLDLENIDLDQLFDLPK      | 50d  | 28 |
| FBgn0034356 | 655.98  | 38  | 2 | FLWPGFGENSR               | 52d  | 28 |
| FBgn0034356 | 954.46  | 66  | 2 | AGNPVLNYLQSGDQFVK         | 56d  | 28 |
| FBgn0034356 | 675.96  | 57  | 2 | ATNPIAMDTIFR              | 56d  | 28 |
| FBgn0034356 | 747.57  | 65  | 2 | DFWEQEVAAIER              | 56d  | 28 |
| FBgn0034356 | 655.64  | 43  | 2 | FLWPGFGENSR               | 56d  | 28 |
| FBgn0034356 | 728.17  | 38  | 1 | YFEEQVGHHLPGAVAEELR       | 56d  | 28 |
| FBgn0034363 | 524.05  | 42  | 2 | MVEQQKRR                  | 82d  | 18 |
| FBgn0034390 | 1145.85 | 83  | 3 | DLGLASGVANASNPIPLGSLAHK   | 2d   | 18 |
| FBgn0034390 | 1145.62 | 51  | 1 | DLGLASGVANASNPIPLGSLAHK   | 22d  | 18 |
| FBgn0034390 | 764.1   | 62  | 1 | DLGLASGVANASNPIPLGSLAHK   | 42d  | 18 |

|             |         |     |   |                           |      |    |
|-------------|---------|-----|---|---------------------------|------|----|
| FBgn0034390 | 876.46  | 69  | 1 | DTIFIDSSTISPDLVK          | 42d  | 18 |
| FBgn0034390 | 876.58  | 62  | 2 | DTIFIDSSTISPDLVK          | 62d  | 18 |
| FBgn0034390 | 1145.69 | 71  | 1 | DLGLASGVANASNSPIPLGSLAHK  | 102d | 18 |
| FBgn0034390 | 764.04  | 89  | 1 | DLGLASGVANASNSPIPLGSLAHK  | 112d | 18 |
| FBgn0034390 | 764.23  | 101 | 2 | DLGLASGVANASNSPIPLGSLAHK  | 122d | 18 |
| FBgn0034390 | 876.51  | 35  | 1 | DTIFIDSSTISPDLVK          | 122d | 18 |
| FBgn0034390 | 876.64  | 39  | 1 | DTIFIDSSTISPDLVK          | 132d | 18 |
| FBgn0034390 | 1145.78 | 66  | 1 | DLGLASGVANASNSPIPLGSLAHK  | 2d   | 28 |
| FBgn0034390 | 1145.66 | 58  | 2 | DLGLASGVANASNSPIPLGSLAHK  | 12d  | 28 |
| FBgn0034390 | 1145.68 | 58  | 1 | DLGLASGVANASNSPIPLGSLAHK  | 22d  | 28 |
| FBgn0034390 | 1145.48 | 40  | 1 | DLGLASGVANASNSPIPLGSLAHK  | 46d  | 28 |
| FBgn0034390 | 764.1   | 60  | 1 | DLGLASGVANASNSPIPLGSLAHK  | 50d  | 28 |
| FBgn0034390 | 1145.52 | 113 | 2 | DLGLASGVANASNSPIPLGSLAHK  | 52d  | 28 |
| FBgn0034390 | 1145.47 | 96  | 3 | DLGLASGVANASNSPIPLGSLAHK  | 56d  | 28 |
| FBgn0034390 | 876.61  | 63  | 1 | DTIFIDSSTISPDLVK          | 56d  | 28 |
| FBgn0034390 | 1011.72 | 54  | 1 | NIGFVGLGNMGANMASNLIK      | 56d  | 28 |
| FBgn0034432 | 1083.8  | 34  | 1 | GSLVSSQVFPYDVLTAEQK       | 2d   | 18 |
| FBgn0034432 | 947.95  | 66  | 2 | AVNLLNLPTAQHELNMTK        | 22d  | 18 |
| FBgn0034432 | 758.87  | 81  | 1 | ASENESFMANIFR             | 42d  | 18 |
| FBgn0034432 | 718.07  | 49  | 2 | ELTNSLIDPFER              | 42d  | 18 |
| FBgn0034432 | 1083.49 | 72  | 4 | GSLVSSQVFPYDVLTAEQK       | 42d  | 18 |
| FBgn0034432 | 587.71  | 63  | 1 | NPSANLGLIFK               | 42d  | 18 |
| FBgn0034432 | 574.28  | 50  | 1 | DYHLEAAISK                | 62d  | 18 |
| FBgn0034432 | 717.72  | 45  | 2 | ELTNSLIDPFER              | 62d  | 18 |
| FBgn0034432 | 574.19  | 40  | 1 | DYHLEAAISK                | 82d  | 18 |
| FBgn0034432 | 611.73  | 61  | 3 | NLQAATSSHHR               | 112d | 18 |
| FBgn0034432 | 758.94  | 53  | 1 | ASENESFMANIFR             | 122d | 18 |
| FBgn0034432 | 1083.61 | 60  | 2 | GSLVSSQVFPYDVLTAEQK       | 122d | 18 |
| FBgn0034432 | 758.59  | 50  | 1 | ASENESFMANIFR             | 132d | 18 |
| FBgn0034432 | 948.18  | 58  | 1 | AVNLLNLPTAQHELNMTK        | 132d | 18 |
| FBgn0034432 | 1207.26 | 73  | 1 | AASTVGLGGTDLSGHVVGELLPYAK | 142d | 18 |
| FBgn0034432 | 948.05  | 48  | 1 | AVNLLNLPTAQHELNMTK        | 142d | 18 |

|             |         |    |   |                           |      |    |
|-------------|---------|----|---|---------------------------|------|----|
| FBgn0034432 | 589.78  | 52 | 2 | IFEGTNDILR                | 142d | 18 |
| FBgn0034432 | 947.96  | 42 | 1 | AVNLNLPQAQHELNMTK         | 2d   | 28 |
| FBgn0034432 | 1083.49 | 37 | 1 | GSLVSSQVFPYDPDLTAEQK      | 2d   | 28 |
| FBgn0034432 | 948.19  | 73 | 3 | AVNLNLPQAQHELNMTK         | 12d  | 28 |
| FBgn0034432 | 587.66  | 41 | 1 | NPSANLGLIFK               | 12d  | 28 |
| FBgn0034432 | 1206.84 | 72 | 2 | AASTVGLGGTDLSGHVVGELLPYAK | 22d  | 28 |
| FBgn0034432 | 758.96  | 49 | 1 | ASENESFMANIFR             | 32d  | 28 |
| FBgn0034432 | 736.35  | 51 | 2 | ASNTAEVYFEDVK             | 32d  | 28 |
| FBgn0034432 | 947.85  | 80 | 1 | AVNLNLPQAQHELNMTK         | 32d  | 28 |
| FBgn0034432 | 1083.72 | 82 | 2 | GSLVSSQVFPYDPDLTAEQK      | 32d  | 28 |
| FBgn0034432 | 657.4   | 50 | 1 | NIVNEQILLTR               | 32d  | 28 |
| FBgn0034432 | 587.66  | 47 | 1 | NPSANLGLIFK               | 32d  | 28 |
| FBgn0034432 | 759.06  | 51 | 2 | ASENESFMANIFR             | 36d  | 28 |
| FBgn0034432 | 947.85  | 81 | 3 | AVNLNLPQAQHELNMTK         | 36d  | 28 |
| FBgn0034432 | 1083.71 | 71 | 3 | GSLVSSQVFPYDPDLTAEQK      | 36d  | 28 |
| FBgn0034432 | 590.06  | 46 | 1 | IFEGTNDILR                | 36d  | 28 |
| FBgn0034432 | 587.91  | 60 | 3 | NPSANLGLIFK               | 36d  | 28 |
| FBgn0034432 | 759.02  | 71 | 3 | ASENESFMANIFR             | 42d  | 28 |
| FBgn0034432 | 1083.7  | 64 | 3 | GSLVSSQVFPYDPDLTAEQK      | 42d  | 28 |
| FBgn0034432 | 589.72  | 43 | 1 | IFEGTNDILR                | 42d  | 28 |
| FBgn0034432 | 657.36  | 42 | 1 | NIVNEQILLTR               | 42d  | 28 |
| FBgn0034432 | 588.04  | 68 | 2 | NPSANLGLIFK               | 42d  | 28 |
| FBgn0034432 | 758.83  | 70 | 2 | ASENESFMANIFR             | 46d  | 28 |
| FBgn0034432 | 1083.77 | 45 | 1 | GSLVSSQVFPYDPDLTAEQK      | 46d  | 28 |
| FBgn0034432 | 587.96  | 63 | 3 | NPSANLGLIFK               | 46d  | 28 |
| FBgn0034432 | 947.87  | 68 | 2 | AVNLNLPQAQHELNMTK         | 50d  | 28 |
| FBgn0034432 | 717.89  | 44 | 3 | ELTNSLIDPFER              | 50d  | 28 |
| FBgn0034432 | 1083.3  | 45 | 1 | GSLVSSQVFPYDPDLTAEQK      | 50d  | 28 |
| FBgn0034432 | 587.86  | 40 | 1 | NPSANLGLIFK               | 50d  | 28 |
| FBgn0034432 | 758.96  | 58 | 1 | ASENESFMANIFR             | 52d  | 28 |
| FBgn0034432 | 947.92  | 68 | 2 | AVNLNLPQAQHELNMTK         | 52d  | 28 |
| FBgn0034432 | 574.26  | 52 | 1 | DYHLEAAISK                | 52d  | 28 |

|             |         |     |   |                                |      |    |
|-------------|---------|-----|---|--------------------------------|------|----|
| FBgn0034432 | 1083.62 | 41  | 1 | GSLVSSQVFPYPDVLTAEQK           | 52d  | 28 |
| FBgn0034432 | 588.02  | 40  | 1 | NPSANLGLIFK                    | 52d  | 28 |
| FBgn0034432 | 758.92  | 63  | 2 | ASENESFMANIFR                  | 56d  | 28 |
| FBgn0034432 | 717.85  | 44  | 2 | ELTNSLIDPFER                   | 56d  | 28 |
| FBgn0034432 | 1083.58 | 69  | 2 | GSLVSSQVFPYPDVLTAEQK           | 56d  | 28 |
| FBgn0034433 | 1179.09 | 65  | 1 | ELANLGGPTYIPLDVNEASASK         | 2d   | 18 |
| FBgn0034433 | 806.38  | 84  | 3 | LLLDGISTSQASHLR                | 2d   | 18 |
| FBgn0034433 | 1615.42 | 46  | 2 | LSNLEHLALDMIEAGGDFGQDLPYGQALIK | 2d   | 18 |
| FBgn0034433 | 806.45  | 74  | 2 | LLLDGISTSQASHLR                | 22d  | 18 |
| FBgn0034433 | 1179.09 | 61  | 3 | ELANLGGPTYIPLDVNEASASK         | 42d  | 18 |
| FBgn0034433 | 1179.13 | 39  | 1 | ELANLGGPTYIPLDVNEASASK         | 112d | 18 |
| FBgn0034433 | 1179.29 | 42  | 1 | ELANLGGPTYIPLDVNEASASK         | 122d | 18 |
| FBgn0034433 | 806.69  | 76  | 3 | LLLDGISTSQASHLR                | 2d   | 28 |
| FBgn0034433 | 1178.95 | 38  | 1 | ELANLGGPTYIPLDVNEASASK         | 12d  | 28 |
| FBgn0034433 | 806.63  | 103 | 2 | LLLDGISTSQASHLR                | 12d  | 28 |
| FBgn0034433 | 1077.18 | 61  | 1 | LSNLEHLALDMIEAGGDFGQDLPYGQALIK | 12d  | 28 |
| FBgn0034433 | 1179.33 | 50  | 1 | ELANLGGPTYIPLDVNEASASK         | 22d  | 28 |
| FBgn0034433 | 806.52  | 58  | 2 | LLLDGISTSQASHLR                | 22d  | 28 |
| FBgn0034433 | 806.67  | 48  | 1 | LLLDGISTSQASHLR                | 50d  | 28 |
| FBgn0034440 | 1154.65 | 35  | 1 | GVFIAERAQSNLYKLAIEIGTK         | 142d | 18 |
| FBgn0034471 | 535.05  | 49  | 2 | LGPIAGEANVK                    | 62d  | 18 |
| FBgn0034472 | 453.6   | 35  | 1 | RLMNLMK                        | 42d  | 18 |
| FBgn0034512 | 1309.37 | 58  | 1 | NEDQTILQNNGNTFLSNGAGQIIR       | 102d | 18 |
| FBgn0034512 | 1309.87 | 64  | 2 | NEDQTILQNNGNTFLSNGAGQIIR       | 132d | 18 |
| FBgn0034512 | 1309.62 | 66  | 2 | NEDQTILQNNGNTFLSNGAGQIIR       | 12d  | 28 |
| FBgn0034512 | 654.84  | 64  | 1 | IQQEVHANLQK                    | 50d  | 28 |
| FBgn0034512 | 1309.69 | 49  | 3 | NEDQTILQNNGNTFLSNGAGQIIR       | 50d  | 28 |
| FBgn0034512 | 654.8   | 64  | 3 | IQQEVHANLQK                    | 52d  | 28 |
| FBgn0034512 | 1309.48 | 69  | 1 | NEDQTILQNNGNTFLSNGAGQIIR       | 52d  | 28 |
| FBgn0034512 | 654.73  | 39  | 1 | IQQEVHANLQK                    | 56d  | 28 |
| FBgn0034512 | 1309.52 | 100 | 1 | NEDQTILQNNGNTFLSNGAGQIIR       | 56d  | 28 |
| FBgn0034517 | 1033.62 | 53  | 1 | LALAAQSEHGEIEDGQYHP            | 132d | 18 |

|             |         |    |   |                              |      |    |
|-------------|---------|----|---|------------------------------|------|----|
| FBgn0034517 | 1033.49 | 51 | 1 | LALAAQSEHGEIEDGQYHP          | 142d | 18 |
| FBgn0034517 | 1033.39 | 39 | 1 | LALAAQSEHGEIEDGQYHP          | 50d  | 28 |
| FBgn0034583 | 550.73  | 43 | 1 | ATHDGTITVGK                  | 2d   | 18 |
| FBgn0034583 | 1534.5  | 68 | 3 | DAHLALTPAPEENGPIFEIFLGGWENTK | 2d   | 18 |
| FBgn0034583 | 1077.56 | 39 | 1 | QKPEVAEVPTPGILDAGEFR         | 2d   | 18 |
| FBgn0034583 | 612.31  | 49 | 1 | WYDNVITVGR                   | 2d   | 18 |
| FBgn0034583 | 718.86  | 50 | 1 | QKPEVAEVPTPGILDAGEFR         | 62d  | 18 |
| FBgn0034583 | 612.25  | 52 | 1 | WYDNVITVGR                   | 82d  | 18 |
| FBgn0034583 | 612.36  | 49 | 2 | WYDNVITVGR                   | 112d | 18 |
| FBgn0034583 | 612.2   | 48 | 2 | WYDNVITVGR                   | 122d | 18 |
| FBgn0034583 | 612.14  | 42 | 1 | WYDNVITVGR                   | 132d | 18 |
| FBgn0034583 | 612.1   | 52 | 3 | WYDNVITVGR                   | 142d | 18 |
| FBgn0034583 | 612.41  | 44 | 1 | WYDNVITVGR                   | 12d  | 28 |
| FBgn0034583 | 718.55  | 68 | 2 | QKPEVAEVPTPGILDAGEFR         | 22d  | 28 |
| FBgn0034583 | 612.15  | 45 | 2 | WYDNVITVGR                   | 22d  | 28 |
| FBgn0034583 | 718.84  | 59 | 2 | QKPEVAEVPTPGILDAGEFR         | 36d  | 28 |
| FBgn0034583 | 612.37  | 48 | 1 | WYDNVITVGR                   | 46d  | 28 |
| FBgn0034583 | 718.74  | 49 | 1 | QKPEVAEVPTPGILDAGEFR         | 50d  | 28 |
| FBgn0034583 | 1077.63 | 36 | 1 | QKPEVAEVPTPGILDAGEFR         | 56d  | 28 |
| FBgn0034588 | 736.96  | 46 | 1 | GWLQDSGNILQLK                | 22d  | 18 |
| FBgn0034588 | 737.06  | 70 | 1 | GWLQDSGNILQLK                | 42d  | 18 |
| FBgn0034588 | 707.22  | 55 | 2 | LFPTLQDFFER                  | 42d  | 18 |
| FBgn0034588 | 707.22  | 35 | 1 | LFPTLQDFFER                  | 62d  | 18 |
| FBgn0034588 | 736.87  | 83 | 1 | GWLQDSGNILQLK                | 102d | 18 |
| FBgn0034588 | 736.99  | 84 | 3 | GWLQDSGNILQLK                | 112d | 18 |
| FBgn0034588 | 736.83  | 83 | 2 | GWLQDSGNILQLK                | 122d | 18 |
| FBgn0034588 | 619.26  | 35 | 1 | SDEFGLIGNER                  | 132d | 18 |
| FBgn0034588 | 736.7   | 79 | 2 | GWLQDSGNILQLK                | 142d | 18 |
| FBgn0034588 | 1063.22 | 45 | 1 | ESIDWFLQQGPTGVIYDR           | 22d  | 28 |
| FBgn0034588 | 736.56  | 68 | 2 | GWLQDSGNILQLK                | 22d  | 28 |
| FBgn0034588 | 1063.06 | 55 | 1 | ESIDWFLQQGPTGVIYDR           | 32d  | 28 |
| FBgn0034588 | 1063.26 | 49 | 1 | ESIDWFLQQGPTGVIYDR           | 36d  | 28 |

|             |         |     |   |                           |      |    |
|-------------|---------|-----|---|---------------------------|------|----|
| FBgn0034588 | 736.88  | 67  | 1 | GWLQDSGNILQLK             | 36d  | 28 |
| FBgn0034588 | 737.01  | 60  | 1 | GWLQDSGNILQLK             | 46d  | 28 |
| FBgn0034588 | 844.13  | 50  | 1 | EALSLEEQPEVGQEK           | 52d  | 28 |
| FBgn0034588 | 737.09  | 71  | 1 | GWLQDSGNILQLK             | 52d  | 28 |
| FBgn0034588 | 707.3   | 58  | 2 | LFPTLQDFFER               | 56d  | 28 |
| FBgn0034603 | 721.21  | 76  | 2 | AITTSNTSSSDKK             | 82d  | 18 |
| FBgn0034618 | 1045.28 | 34  | 1 | EAGYNVIHFTPIQELGGSR       | 2d   | 18 |
| FBgn0034618 | 743.7   | 79  | 2 | EALSAWDSHEQGR             | 2d   | 18 |
| FBgn0034618 | 1044.39 | 39  | 1 | EAGYNVIHFTPIQELGGSR       | 62d  | 18 |
| FBgn0034618 | 1045.06 | 62  | 1 | EAGYNVIHFTPIQELGGSR       | 12d  | 28 |
| FBgn0034654 | 895.85  | 48  | 1 | ELGGIEDSTLESWIK           | 36d  | 28 |
| FBgn0034753 | 1003.28 | 57  | 2 | DVVIANSGLTPVSEAFSVAK      | 2d   | 18 |
| FBgn0034753 | 1003.19 | 68  | 1 | DVVIANSGLTPVSEAFSVAK      | 42d  | 18 |
| FBgn0034753 | 1003.23 | 38  | 1 | DVVIANSGLTPVSEAFSVAK      | 56d  | 28 |
| FBgn0034789 | 1244.08 | 75  | 1 | APLAEDSDVDADDPLDGDAATGISR | 62d  | 18 |
| FBgn0034789 | 1244.28 | 72  | 1 | APLAEDSDVDADDPLDGDAATGISR | 82d  | 18 |
| FBgn0034789 | 1243.98 | 105 | 1 | APLAEDSDVDADDPLDGDAATGISR | 102d | 18 |
| FBgn0034789 | 1244.22 | 88  | 1 | APLAEDSDVDADDPLDGDAATGISR | 122d | 18 |
| FBgn0034789 | 1244.18 | 83  | 2 | APLAEDSDVDADDPLDGDAATGISR | 132d | 18 |
| FBgn0034789 | 1244.18 | 61  | 1 | APLAEDSDVDADDPLDGDAATGISR | 142d | 18 |
| FBgn0034789 | 1243.89 | 70  | 1 | APLAEDSDVDADDPLDGDAATGISR | 2d   | 28 |
| FBgn0034789 | 1243.97 | 34  | 1 | APLAEDSDVDADDPLDGDAATGISR | 12d  | 28 |
| FBgn0034967 | 856.93  | 42  | 2 | EDLKVPEGELGEQLR           | 2d   | 18 |
| FBgn0034967 | 857.18  | 34  | 1 | EDLKVPEGELGEQLR           | 22d  | 18 |
| FBgn0034967 | 856.93  | 41  | 2 | EDLKVPEGELGEQLR           | 42d  | 18 |
| FBgn0034967 | 856.99  | 57  | 3 | EDLKVPEGELGEQLR           | 2d   | 28 |
| FBgn0034967 | 614.26  | 59  | 2 | VPEGELGEQLR               | 2d   | 28 |
| FBgn0034986 | 477.75  | 34  | 1 | LITHNVEK                  | 32d  | 28 |
| FBgn0035024 | 658.93  | 34  | 1 | DKKSNQENQPK               | 102d | 18 |
| FBgn0035032 | 686.83  | 65  | 5 | AFGDYPAEYNPK              | 2d   | 18 |
| FBgn0035032 | 536.83  | 50  | 1 | LGEIGAWLGR                | 2d   | 18 |
| FBgn0035032 | 686.71  | 57  | 1 | AFGDYPAEYNPK              | 22d  | 18 |

|             |         |     |   |                             |      |    |
|-------------|---------|-----|---|-----------------------------|------|----|
| FBgn0035032 | 686.96  | 49  | 2 | AFGDYPAEYNPK                | 62d  | 18 |
| FBgn0035032 | 686.91  | 58  | 1 | AFGDYPAEYNPK                | 82d  | 18 |
| FBgn0035032 | 686.94  | 46  | 1 | AFGDYPAEYNPK                | 102d | 18 |
| FBgn0035032 | 536.87  | 61  | 1 | LGEIGAWLGR                  | 122d | 18 |
| FBgn0035032 | 686.88  | 37  | 1 | AFGDYPAEYNPK                | 132d | 18 |
| FBgn0035032 | 536.68  | 67  | 1 | LGEIGAWLGR                  | 132d | 18 |
| FBgn0035032 | 536.68  | 67  | 1 | LGEIGAWLGR                  | 12d  | 28 |
| FBgn0035032 | 686.82  | 53  | 2 | AFGDYPAEYNPK                | 32d  | 28 |
| FBgn0035032 | 686.85  | 40  | 1 | AFGDYPAEYNPK                | 36d  | 28 |
| FBgn0035032 | 686.79  | 42  | 2 | AFGDYPAEYNPK                | 42d  | 28 |
| FBgn0035032 | 686.73  | 51  | 1 | AFGDYPAEYNPK                | 46d  | 28 |
| FBgn0035032 | 686.87  | 49  | 3 | AFGDYPAEYNPK                | 50d  | 28 |
| FBgn0035046 | 1072    | 56  | 3 | VSYPDATPGLPEDYKPPAK         | 2d   | 18 |
| FBgn0035046 | 715.07  | 41  | 1 | VSYPDATPGLPEDYKPPAK         | 62d  | 18 |
| FBgn0035046 | 1071.94 | 42  | 1 | VSYPDATPGLPEDYKPPAK         | 122d | 18 |
| FBgn0035046 | 1071.73 | 73  | 3 | VSYPDATPGLPEDYKPPAK         | 12d  | 28 |
| FBgn0035046 | 1071.83 | 58  | 2 | VSYPDATPGLPEDYKPPAK         | 22d  | 28 |
| FBgn0035060 | 1196.88 | 96  | 1 | AAQPTGGFGSGGGGFADFDDFDNK    | 2d   | 18 |
| FBgn0035060 | 1012.54 | 39  | 1 | DIAPPAIIPPLPVAVPPMTR        | 22d  | 18 |
| FBgn0035060 | 760.7   | 35  | 1 | SLQSELDTLTATLK              | 22d  | 18 |
| FBgn0035060 | 760.81  | 66  | 1 | SLQSELDTLTATLK              | 42d  | 18 |
| FBgn0035060 | 761.03  | 83  | 1 | SLQSELDTLTATLK              | 62d  | 18 |
| FBgn0035060 | 760.91  | 69  | 1 | SLQSELDTLTATLK              | 82d  | 18 |
| FBgn0035060 | 1196.9  | 65  | 1 | AAQPTGGFGSGGGGFADFDDFDNK    | 102d | 18 |
| FBgn0035060 | 1196.99 | 56  | 1 | AAQPTGGFGSGGGGFADFDDFDNK    | 112d | 18 |
| FBgn0035060 | 982.51  | 64  | 1 | ATVAGVDLQPQEVKPTYSNPELEMISK | 112d | 18 |
| FBgn0035060 | 760.96  | 60  | 1 | SLQSELDTLTATLK              | 112d | 18 |
| FBgn0035060 | 1196.83 | 87  | 1 | AAQPTGGFGSGGGGFADFDDFDNK    | 2d   | 28 |
| FBgn0035060 | 1012.75 | 52  | 2 | DIAPPAIIPPLPVAVPPMTR        | 2d   | 28 |
| FBgn0035060 | 1196.94 | 118 | 1 | AAQPTGGFGSGGGGFADFDDFDNK    | 12d  | 28 |
| FBgn0035060 | 761.12  | 40  | 1 | SLQSELDTLTATLK              | 12d  | 28 |
| FBgn0035060 | 1196.89 | 88  | 1 | AAQPTGGFGSGGGGFADFDDFDNK    | 32d  | 28 |



|             |         |     |   |                               |      |    |
|-------------|---------|-----|---|-------------------------------|------|----|
| FBgn0035060 | 1012.72 | 35  | 1 | DIAPPAAIPPLPVAVPPMTR          | 32d  | 28 |
| FBgn0035060 | 1196.84 | 111 | 1 | AAQPTGGFGSGGGGGFADFDDFDNK     | 36d  | 28 |
| FBgn0035060 | 1012.69 | 38  | 1 | DIAPPAAIPPLPVAVPPMTR          | 36d  | 28 |
| FBgn0035060 | 760.87  | 60  | 2 | SLQSELDTLTATLK                | 36d  | 28 |
| FBgn0035060 | 1196.87 | 93  | 1 | AAQPTGGFGSGGGGGFADFDDFDNK     | 42d  | 28 |
| FBgn0035060 | 1196.73 | 100 | 1 | AAQPTGGFGSGGGGGFADFDDFDNK     | 46d  | 28 |
| FBgn0035060 | 1012.69 | 47  | 1 | DIAPPAAIPPLPVAVPPMTR          | 46d  | 28 |
| FBgn0035060 | 1196.9  | 92  | 1 | AAQPTGGFGSGGGGGFADFDDFDNK     | 50d  | 28 |
| FBgn0035060 | 620.62  | 40  | 1 | DPFGSDAFAANK                  | 50d  | 28 |
| FBgn0035060 | 761.06  | 80  | 3 | SLQSELDTLTATLK                | 56d  | 28 |
| FBgn0035121 | 972.55  | 84  | 3 | LHADFQSNPPIAGSYTPK            | 2d   | 18 |
| FBgn0035121 | 764.25  | 52  | 1 | YGDITQDDAPEFR                 | 2d   | 18 |
| FBgn0035121 | 972.43  | 36  | 1 | LHADFQSNPPIAGSYTPK            | 12d  | 28 |
| FBgn0035125 | 597.74  | 34  | 1 | LSAGVKPTPAPR                  | 36d  | 28 |
| FBgn0035150 | 1230.21 | 34  | 1 | HIEESIQNQMLTIEGYLLFIEYIRCIKCS | 62d  | 18 |
| FBgn0035226 | 686.33  | 54  | 2 | YLIENFASEER                   | 112d | 18 |
| FBgn0035226 | 686.25  | 50  | 1 | YLIENFASEER                   | 122d | 18 |
| FBgn0035226 | 686.53  | 57  | 1 | YLIENFASEER                   | 142d | 18 |
| FBgn0035251 | 987.27  | 64  | 2 | AFYSSGVLYDILQTFGELSEALHNR     | 56d  | 28 |
| FBgn0035272 | 352.63  | 47  | 1 | TETVGAK                       | 32d  | 28 |
| FBgn0035272 | 353.23  | 38  | 1 | TETVGAK                       | 36d  | 28 |
| FBgn0035280 | 872.78  | 62  | 1 | YAFNYGVADHSTGDVK              | 2d   | 28 |
| FBgn0035280 | 872.82  | 47  | 1 | YAFNYGVADHSTGDVK              | 50d  | 28 |
| FBgn0035281 | 683.85  | 50  | 2 | GSYSLVEPDGSVR                 | 2d   | 18 |
| FBgn0035308 | 581.22  | 36  | 1 | NQEMLAVNNK                    | 22d  | 28 |
| FBgn0035334 | 666.42  | 64  | 1 | IESIVGEQAGSIK                 | 82d  | 18 |
| FBgn0035334 | 666.49  | 35  | 1 | IESIVGEQAGSIK                 | 2d   | 28 |
| FBgn0035334 | 652.85  | 51  | 1 | MVGLQDEDKIR                   | 12d  | 28 |
| FBgn0035334 | 584.28  | 45  | 1 | VQSAEDFDKK                    | 12d  | 28 |
| FBgn0035355 | 786.2   | 55  | 2 | AIGEFTVANEHLNR                | 42d  | 18 |
| FBgn0035367 | 371.4   | 43  | 1 | QEPGRR                        | 46d  | 28 |
| FBgn0035370 | 1018.7  | 38  | 1 | AYNLSPELSALMGESSLPR           | 42d  | 18 |

|             |         |    |   |                       |     |    |
|-------------|---------|----|---|-----------------------|-----|----|
| FBgn0035370 | 1018.7  | 66 | 2 | AYNLSPELSALMGESSLPR   | 2d  | 28 |
| FBgn0035402 | 1055.61 | 42 | 1 | SAGGLQPGEEALPEPATEEVK | 2d  | 18 |
| FBgn0035402 | 1055.61 | 46 | 1 | SAGGLQPGEEALPEPATEEVK | 2d  | 28 |
| FBgn0035404 | 455.64  | 39 | 1 | AANWYER               | 2d  | 18 |
| FBgn0035404 | 767.26  | 64 | 2 | ILTDYGFEGHPQR         | 2d  | 18 |
| FBgn0035404 | 942.06  | 56 | 1 | KFDLSAPWEQFPNFR       | 2d  | 18 |
| FBgn0035404 | 767.31  | 63 | 2 | ILTDYGFEGHPQR         | 22d | 18 |
| FBgn0035404 | 942.03  | 41 | 1 | KFDLSAPWEQFPNFR       | 42d | 18 |
| FBgn0035404 | 767.26  | 70 | 2 | ILTDYGFEGHPQR         | 62d | 18 |
| FBgn0035404 | 941.72  | 55 | 2 | KFDLSAPWEQFPNFR       | 62d | 18 |
| FBgn0035404 | 767.46  | 64 | 2 | ILTDYGFEGHPQR         | 82d | 18 |
| FBgn0035404 | 767.29  | 62 | 3 | ILTDYGFEGHPQR         | 2d  | 28 |
| FBgn0035404 | 941.89  | 51 | 2 | KFDLSAPWEQFPNFR       | 2d  | 28 |
| FBgn0035404 | 800.74  | 59 | 3 | NANPPAEVPPQAPAK       | 2d  | 28 |
| FBgn0035404 | 511.9   | 38 | 1 | ILTDYGFEGHPQR         | 12d | 28 |
| FBgn0035404 | 800.95  | 37 | 1 | NANPPAEVPPQAPAK       | 12d | 28 |
| FBgn0035404 | 767.29  | 62 | 2 | ILTDYGFEGHPQR         | 22d | 28 |
| FBgn0035404 | 942.06  | 48 | 2 | KFDLSAPWEQFPNFR       | 22d | 28 |
| FBgn0035404 | 767.37  | 53 | 2 | ILTDYGFEGHPQR         | 32d | 28 |
| FBgn0035404 | 767.32  | 64 | 2 | ILTDYGFEGHPQR         | 36d | 28 |
| FBgn0035404 | 767.21  | 60 | 2 | ILTDYGFEGHPQR         | 42d | 28 |
| FBgn0035404 | 767.22  | 72 | 1 | ILTDYGFEGHPQR         | 46d | 28 |
| FBgn0035404 | 767.27  | 77 | 3 | ILTDYGFEGHPQR         | 50d | 28 |
| FBgn0035404 | 767.38  | 60 | 2 | ILTDYGFEGHPQR         | 52d | 28 |
| FBgn0035423 | 784.22  | 47 | 1 | GNDDDIQDGLVHIR        | 2d  | 28 |
| FBgn0035438 | 608.1   | 45 | 1 | DTHGNDVSLEK           | 62d | 18 |
| FBgn0035438 | 688.78  | 36 | 1 | VDVNGDNAAPLYK         | 82d | 18 |
| FBgn0035438 | 689.05  | 68 | 1 | VDVNGDNAAPLYK         | 12d | 28 |
| FBgn0035438 | 688.82  | 40 | 1 | VDVNGDNAAPLYK         | 22d | 28 |
| FBgn0035438 | 688.83  | 53 | 1 | VDVNGDNAAPLYK         | 32d | 28 |
| FBgn0035438 | 662.16  | 39 | 1 | YAPTTDPMDIAK          | 32d | 28 |
| FBgn0035438 | 688.91  | 68 | 1 | VDVNGDNAAPLYK         | 36d | 28 |

|             |         |    |   |                          |      |    |
|-------------|---------|----|---|--------------------------|------|----|
| FBgn0035438 | 662.44  | 35 | 1 | YAPTTDPMDIAK             | 36d  | 28 |
| FBgn0035438 | 688.72  | 55 | 2 | VDVNGDNAAPLYK            | 42d  | 28 |
| FBgn0035438 | 662.16  | 39 | 1 | YAPTTDPMDIAK             | 50d  | 28 |
| FBgn0035438 | 688.55  | 58 | 2 | VDVNGDNAAPLYK            | 52d  | 28 |
| FBgn0035484 | 705.51  | 68 | 2 | VFDLPDFLTWR              | 42d  | 18 |
| FBgn0035484 | 705.1   | 60 | 1 | VFDLPDFLTWR              | 112d | 18 |
| FBgn0035484 | 705.38  | 60 | 1 | VFDLPDFLTWR              | 142d | 18 |
| FBgn0035484 | 705.24  | 49 | 1 | VFDLPDFLTWR              | 56d  | 28 |
| FBgn0035489 | 865.65  | 36 | 1 | FDDEIVEYNIAVPTNRS GTDANR | 56d  | 28 |
| FBgn0035499 | 1163.98 | 82 | 2 | AVTEEPINTSGD TDNFFEV LK  | 2d   | 18 |
| FBgn0035499 | 1077.54 | 76 | 2 | NFGVPTQETFQSV DLWER      | 2d   | 18 |
| FBgn0035499 | 863.61  | 36 | 1 | YSEELAQESLEWIK           | 2d   | 18 |
| FBgn0035499 | 1164.15 | 91 | 5 | AVTEEPINTSGD TDNFFEV LK  | 42d  | 18 |
| FBgn0035499 | 863.5   | 77 | 2 | YSEELAQESLEWIK           | 42d  | 18 |
| FBgn0035499 | 1163.95 | 76 | 2 | AVTEEPINTSGD TDNFFEV LK  | 62d  | 18 |
| FBgn0035499 | 1077.76 | 62 | 2 | NFGVPTQETFQSV DLWER      | 62d  | 18 |
| FBgn0035499 | 863.35  | 55 | 1 | YSEELAQESLEWIK           | 62d  | 18 |
| FBgn0035499 | 1164.2  | 66 | 1 | AVTEEPINTSGD TDNFFEV LK  | 82d  | 18 |
| FBgn0035499 | 1077.11 | 58 | 1 | NFGVPTQETFQSV DLWER      | 82d  | 18 |
| FBgn0035499 | 863.5   | 62 | 3 | YSEELAQESLEWIK           | 82d  | 18 |
| FBgn0035499 | 1164.26 | 91 | 3 | AVTEEPINTSGD TDNFFEV LK  | 102d | 18 |
| FBgn0035499 | 1077.56 | 79 | 1 | NFGVPTQETFQSV DLWER      | 102d | 18 |
| FBgn0035499 | 863.4   | 58 | 2 | YSEELAQESLEWIK           | 102d | 18 |
| FBgn0035499 | 1163.96 | 64 | 1 | AVTEEPINTSGD TDNFFEV LK  | 112d | 18 |
| FBgn0035499 | 1077.7  | 72 | 2 | NFGVPTQETFQSV DLWER      | 112d | 18 |
| FBgn0035499 | 863.5   | 43 | 1 | YSEELAQESLEWIK           | 112d | 18 |
| FBgn0035499 | 1164.16 | 53 | 3 | AVTEEPINTSGD TDNFFEV LK  | 122d | 18 |
| FBgn0035499 | 1077.57 | 59 | 1 | NFGVPTQETFQSV DLWER      | 122d | 18 |
| FBgn0035499 | 863.46  | 68 | 2 | YSEELAQESLEWIK           | 122d | 18 |
| FBgn0035499 | 1077.69 | 59 | 1 | NFGVPTQETFQSV DLWER      | 132d | 18 |
| FBgn0035499 | 1164.12 | 49 | 1 | AVTEEPINTSGD TDNFFEV LK  | 142d | 18 |
| FBgn0035499 | 1077.65 | 69 | 1 | NFGVPTQETFQSV DLWER      | 142d | 18 |

|             |         |    |   |                                   |      |    |
|-------------|---------|----|---|-----------------------------------|------|----|
| FBgn0035499 | 863.28  | 66 | 1 | YSEELAQESLEWIK                    | 142d | 18 |
| FBgn0035499 | 1164.16 | 85 | 2 | AVTEEPINTSGDTDNFFEVLK             | 2d   | 28 |
| FBgn0035499 | 1077.73 | 58 | 3 | NFGVPTQETFQSVDLWER                | 2d   | 28 |
| FBgn0035499 | 863.38  | 56 | 2 | YSEELAQESLEWIK                    | 2d   | 28 |
| FBgn0035499 | 1163.95 | 97 | 2 | AVTEEPINTSGDTDNFFEVLK             | 12d  | 28 |
| FBgn0035499 | 1077.69 | 65 | 2 | NFGVPTQETFQSVDLWER                | 12d  | 28 |
| FBgn0035499 | 863.54  | 69 | 1 | YSEELAQESLEWIK                    | 12d  | 28 |
| FBgn0035499 | 1163.96 | 69 | 3 | AVTEEPINTSGDTDNFFEVLK             | 42d  | 28 |
| FBgn0035499 | 863.42  | 48 | 1 | YSEELAQESLEWIK                    | 42d  | 28 |
| FBgn0035499 | 1163.9  | 67 | 1 | AVTEEPINTSGDTDNFFEVLK             | 46d  | 28 |
| FBgn0035499 | 1163.95 | 61 | 2 | AVTEEPINTSGDTDNFFEVLK             | 50d  | 28 |
| FBgn0035499 | 863.63  | 81 | 2 | YSEELAQESLEWIK                    | 50d  | 28 |
| FBgn0035499 | 1164.03 | 88 | 2 | AVTEEPINTSGDTDNFFEVLK             | 52d  | 28 |
| FBgn0035499 | 863.43  | 47 | 1 | YSEELAQESLEWIK                    | 52d  | 28 |
| FBgn0035499 | 1164.1  | 69 | 3 | AVTEEPINTSGDTDNFFEVLK             | 56d  | 28 |
| FBgn0035499 | 1077.48 | 76 | 2 | NFGVPTQETFQSVDLWER                | 56d  | 28 |
| FBgn0035499 | 863.61  | 86 | 2 | YSEELAQESLEWIK                    | 56d  | 28 |
| FBgn0035500 | 1275    | 70 | 1 | TTADEPVPEAEVPTTEAPVVVPSVSK        | 2d   | 18 |
| FBgn0035500 | 1275.27 | 53 | 1 | TTADEPVPEAEVPTTEAPVVVPSVSK        | 42d  | 18 |
| FBgn0035500 | 1274.96 | 52 | 1 | TTADEPVPEAEVPTTEAPVVVPSVSK        | 62d  | 18 |
| FBgn0035500 | 1275.04 | 69 | 1 | TTADEPVPEAEVPTTEAPVVVPSVSK        | 122d | 18 |
| FBgn0035500 | 1275.33 | 64 | 3 | TTADEPVPEAEVPTTEAPVVVPSVSK        | 132d | 18 |
| FBgn0035500 | 1274.97 | 77 | 3 | TTADEPVPEAEVPTTEAPVVVPSVSK        | 12d  | 28 |
| FBgn0035500 | 1275.18 | 68 | 2 | TTADEPVPEAEVPTTEAPVVVPSVSK        | 42d  | 28 |
| FBgn0035500 | 1275.05 | 57 | 2 | TTADEPVPEAEVPTTEAPVVVPSVSK        | 52d  | 28 |
| FBgn0035510 | 1068.65 | 59 | 2 | VPAYGPALAPAYPALAHGYGPALAPAYGPALPK | 42d  | 18 |
| FBgn0035510 | 1019.57 | 36 | 1 | VAGPEPYDPNPQYTFYSYDVHDGSTGDVK     | 122d | 18 |
| FBgn0035510 | 1068.56 | 36 | 1 | VPAYGPALAPAYPALAHGYGPALAPAYGPALPK | 2d   | 28 |
| FBgn0035510 | 1068.72 | 55 | 1 | VPAYGPALAPAYPALAHGYGPALAPAYGPALPK | 12d  | 28 |
| FBgn0035510 | 1068.71 | 49 | 1 | VPAYGPALAPAYPALAHGYGPALAPAYGPALPK | 32d  | 28 |
| FBgn0035510 | 1068.68 | 55 | 2 | VPAYGPALAPAYPALAHGYGPALAPAYGPALPK | 56d  | 28 |
| FBgn0035513 | 723.9   | 44 | 2 | DVPVAVAPVAPVLAK                   | 2d   | 18 |

|             |         |    |   |                               |      |    |
|-------------|---------|----|---|-------------------------------|------|----|
| FBgn0035513 | 724.08  | 43 | 2 | DVPVAVAPVAPVLAK               | 22d  | 18 |
| FBgn0035513 | 723.99  | 42 | 2 | DVPVAVAPVAPVLAK               | 42d  | 18 |
| FBgn0035513 | 924.44  | 76 | 2 | TVAAPVAPVAAAAPAPVFAK          | 42d  | 18 |
| FBgn0035513 | 724.17  | 41 | 1 | DVPVAVAPVAPVLAK               | 62d  | 18 |
| FBgn0035513 | 723.91  | 38 | 1 | DVPVAVAPVAPVLAK               | 132d | 18 |
| FBgn0035513 | 723.7   | 46 | 1 | DVPVAVAPVAPVLAK               | 2d   | 28 |
| FBgn0035513 | 924.63  | 77 | 1 | TVAAPVAPVAAAAPAPVFAK          | 2d   | 28 |
| FBgn0035513 | 723.9   | 65 | 1 | DVPVAVAPVAPVLAK               | 12d  | 28 |
| FBgn0035513 | 724.15  | 46 | 1 | DVPVAVAPVAPVLAK               | 32d  | 28 |
| FBgn0035513 | 723.84  | 51 | 2 | DVPVAVAPVAPVLAK               | 56d  | 28 |
| FBgn0035522 | 943.13  | 35 | 1 | KQEKVEVTTLATNVPVK             | 50d  | 28 |
| FBgn0035593 | 1097.2  | 62 | 2 | AAPSPAAPVPGGTTVEDDEALAR       | 112d | 18 |
| FBgn0035593 | 1097.01 | 60 | 1 | AAPSPAAPVPGGTTVEDDEALAR       | 2d   | 28 |
| FBgn0035593 | 1097.04 | 77 | 2 | AAPSPAAPVPGGTTVEDDEALAR       | 56d  | 28 |
| FBgn0035600 | 928.71  | 37 | 1 | LSDYFSPYPNEEAAR               | 22d  | 18 |
| FBgn0035600 | 685.03  | 53 | 1 | NLVGVTHTEAEAK                 | 22d  | 18 |
| FBgn0035600 | 1226.29 | 55 | 1 | GGEDYIFSLLTGYHDAPAGVCLR       | 102d | 18 |
| FBgn0035600 | 928.81  | 46 | 1 | LSDYFSPYPNEEAAR               | 102d | 18 |
| FBgn0035600 | 685     | 49 | 1 | NLVGVTHTEAEAK                 | 2d   | 28 |
| FBgn0035600 | 929.02  | 60 | 1 | LSDYFSPYPNEEAAR               | 32d  | 28 |
| FBgn0035600 | 929.02  | 40 | 1 | LSDYFSPYPNEEAAR               | 52d  | 28 |
| FBgn0035760 | 446.89  | 37 | 1 | VKVPLIIGSGVTR                 | 122d | 18 |
| FBgn0035760 | 447.11  | 38 | 1 | VKVPLIIGSGVTR                 | 132d | 18 |
| FBgn0035768 | 352.64  | 35 | 1 | ASEQIR                        | 36d  | 28 |
| FBgn0035772 | 856.24  | 43 | 1 | YDTV DITEPGKESEK              | 2d   | 28 |
| FBgn0035808 | 1163.22 | 36 | 1 | STLDRFHVDEILAEQVTDEHSSSDHKSFK | 102d | 18 |
| FBgn0035811 | 800.35  | 83 | 3 | IYQIYEGTSQIQR                 | 2d   | 18 |
| FBgn0035811 | 588.54  | 45 | 1 | LSAWEIDQGR                    | 2d   | 18 |
| FBgn0035811 | 732.81  | 53 | 1 | TRPPVAAGAVGLAQR               | 2d   | 18 |
| FBgn0035811 | 688.9   | 54 | 2 | EEIIPVAAQYDK                  | 22d  | 18 |
| FBgn0035811 | 1172.26 | 68 | 2 | IASDAVQIFGGNGFNSEYPVEK        | 22d  | 18 |
| FBgn0035811 | 800.1   | 81 | 4 | IYQIYEGTSQIQR                 | 22d  | 18 |

|             |         |    |   |                        |      |    |
|-------------|---------|----|---|------------------------|------|----|
| FBgn0035811 | 588.21  | 48 | 3 | LSAWEIDQGR             | 22d  | 18 |
| FBgn0035811 | 595.19  | 34 | 1 | SGEYPWPIIK             | 22d  | 18 |
| FBgn0035811 | 733.01  | 43 | 1 | TRPPVAAGAVGLAQR        | 22d  | 18 |
| FBgn0035811 | 520.94  | 50 | 1 | AFTGFIVER              | 42d  | 18 |
| FBgn0035811 | 689.02  | 41 | 1 | EEIIPVAAQYDK           | 42d  | 18 |
| FBgn0035811 | 469.19  | 39 | 1 | GITFEDVR               | 42d  | 18 |
| FBgn0035811 | 1172.13 | 73 | 1 | IASDAVQIFGGNGFNSEYPVEK | 42d  | 18 |
| FBgn0035811 | 800.26  | 86 | 2 | IYQIYEGTSQIQR          | 42d  | 18 |
| FBgn0035811 | 588.28  | 44 | 2 | LSAWEIDQGR             | 42d  | 18 |
| FBgn0035811 | 596.01  | 43 | 2 | SGEYPWPIIK             | 42d  | 18 |
| FBgn0035811 | 799.96  | 85 | 4 | IYQIYEGTSQIQR          | 62d  | 18 |
| FBgn0035811 | 588.47  | 46 | 1 | LSAWEIDQGR             | 62d  | 18 |
| FBgn0035811 | 595.76  | 38 | 2 | SGEYPWPIIK             | 62d  | 18 |
| FBgn0035811 | 450.48  | 36 | 1 | DSPGLTPGR              | 82d  | 18 |
| FBgn0035811 | 689.1   | 57 | 2 | EEIIPVAAQYDK           | 82d  | 18 |
| FBgn0035811 | 1172.11 | 59 | 2 | IASDAVQIFGGNGFNSEYPVEK | 82d  | 18 |
| FBgn0035811 | 588.19  | 44 | 1 | LSAWEIDQGR             | 82d  | 18 |
| FBgn0035811 | 1172.01 | 69 | 1 | IASDAVQIFGGNGFNSEYPVEK | 102d | 18 |
| FBgn0035811 | 595.55  | 38 | 1 | SGEYPWPIIK             | 102d | 18 |
| FBgn0035811 | 520.98  | 59 | 1 | AFTGFIVER              | 112d | 18 |
| FBgn0035811 | 1172.3  | 42 | 1 | IASDAVQIFGGNGFNSEYPVEK | 112d | 18 |
| FBgn0035811 | 800.38  | 87 | 1 | IYQIYEGTSQIQR          | 112d | 18 |
| FBgn0035811 | 595.63  | 34 | 1 | SGEYPWPIIK             | 112d | 18 |
| FBgn0035811 | 520.85  | 64 | 1 | AFTGFIVER              | 122d | 18 |
| FBgn0035811 | 1171.44 | 52 | 2 | IASDAVQIFGGNGFNSEYPVEK | 122d | 18 |
| FBgn0035811 | 800.47  | 80 | 1 | IYQIYEGTSQIQR          | 122d | 18 |
| FBgn0035811 | 588.53  | 43 | 1 | LSAWEIDQGR             | 122d | 18 |
| FBgn0035811 | 800.53  | 77 | 1 | IYQIYEGTSQIQR          | 132d | 18 |
| FBgn0035811 | 520.53  | 64 | 2 | AFTGFIVER              | 142d | 18 |
| FBgn0035811 | 596.04  | 44 | 1 | SGEYPWPIIK             | 142d | 18 |
| FBgn0035811 | 688.96  | 54 | 1 | EEIIPVAAQYDK           | 2d   | 28 |
| FBgn0035811 | 800.21  | 65 | 2 | IYQIYEGTSQIQR          | 2d   | 28 |

|             |         |    |   |                        |     |    |
|-------------|---------|----|---|------------------------|-----|----|
| FBgn0035811 | 520.87  | 67 | 2 | AFTGFIVER              | 12d | 28 |
| FBgn0035811 | 688.7   | 36 | 2 | EEIIPVAAQYDK           | 12d | 28 |
| FBgn0035811 | 1172.29 | 86 | 1 | IASDAVQIFGGNGFNSEYPVEK | 12d | 28 |
| FBgn0035811 | 800.29  | 88 | 6 | IYQIYEGTSQIQR          | 12d | 28 |
| FBgn0035811 | 588.11  | 59 | 3 | LSAWEIDQGR             | 12d | 28 |
| FBgn0035811 | 596     | 36 | 1 | SGEYPWPIIK             | 12d | 28 |
| FBgn0035811 | 732.75  | 78 | 3 | TRPPVAAGAVGLAQR        | 12d | 28 |
| FBgn0035811 | 1171.9  | 57 | 1 | IASDAVQIFGGNGFNSEYPVEK | 22d | 28 |
| FBgn0035811 | 800.16  | 81 | 5 | IYQIYEGTSQIQR          | 22d | 28 |
| FBgn0035811 | 588.03  | 42 | 1 | LSAWEIDQGR             | 22d | 28 |
| FBgn0035811 | 595.45  | 38 | 1 | SGEYPWPIIK             | 22d | 28 |
| FBgn0035811 | 689     | 57 | 2 | EEIIPVAAQYDK           | 32d | 28 |
| FBgn0035811 | 1171.91 | 69 | 3 | IASDAVQIFGGNGFNSEYPVEK | 32d | 28 |
| FBgn0035811 | 800.15  | 91 | 4 | IYQIYEGTSQIQR          | 32d | 28 |
| FBgn0035811 | 587.98  | 48 | 2 | LSAWEIDQGR             | 32d | 28 |
| FBgn0035811 | 509.14  | 38 | 1 | NSYYASIAK              | 32d | 28 |
| FBgn0035811 | 595.6   | 51 | 2 | SGEYPWPIIK             | 32d | 28 |
| FBgn0035811 | 688.75  | 56 | 2 | EEIIPVAAQYDK           | 36d | 28 |
| FBgn0035811 | 1171.87 | 86 | 3 | IASDAVQIFGGNGFNSEYPVEK | 36d | 28 |
| FBgn0035811 | 800.1   | 79 | 3 | IYQIYEGTSQIQR          | 36d | 28 |
| FBgn0035811 | 588.05  | 46 | 3 | LSAWEIDQGR             | 36d | 28 |
| FBgn0035811 | 595.95  | 40 | 2 | SGEYPWPIIK             | 36d | 28 |
| FBgn0035811 | 688.83  | 48 | 2 | EEIIPVAAQYDK           | 42d | 28 |
| FBgn0035811 | 1172    | 57 | 2 | IASDAVQIFGGNGFNSEYPVEK | 42d | 28 |
| FBgn0035811 | 800.13  | 83 | 5 | IYQIYEGTSQIQR          | 42d | 28 |
| FBgn0035811 | 588.38  | 49 | 3 | LSAWEIDQGR             | 42d | 28 |
| FBgn0035811 | 595.75  | 36 | 2 | SGEYPWPIIK             | 42d | 28 |
| FBgn0035811 | 732.69  | 43 | 2 | TRPPVAAGAVGLAQR        | 42d | 28 |
| FBgn0035811 | 688.86  | 63 | 1 | EEIIPVAAQYDK           | 46d | 28 |
| FBgn0035811 | 1172.29 | 52 | 3 | IASDAVQIFGGNGFNSEYPVEK | 46d | 28 |
| FBgn0035811 | 800.09  | 95 | 3 | IYQIYEGTSQIQR          | 46d | 28 |
| FBgn0035811 | 588.36  | 46 | 1 | LSAWEIDQGR             | 46d | 28 |

|             |         |     |   |                              |      |    |
|-------------|---------|-----|---|------------------------------|------|----|
| FBgn0035811 | 595.7   | 40  | 2 | SGEYPWPIIK                   | 46d  | 28 |
| FBgn0035811 | 732.83  | 51  | 2 | TRPPVAAGAVGLAQR              | 46d  | 28 |
| FBgn0035811 | 688.85  | 67  | 1 | EEIIPVAAQYDK                 | 50d  | 28 |
| FBgn0035811 | 800.26  | 87  | 2 | IYQIYEGTSQIQR                | 50d  | 28 |
| FBgn0035811 | 588.28  | 52  | 3 | LSAWEIDQGR                   | 50d  | 28 |
| FBgn0035811 | 688.89  | 61  | 3 | EEIIPVAAQYDK                 | 52d  | 28 |
| FBgn0035811 | 1172.12 | 85  | 3 | IASDAVQIFGGNGFNSEYPVEK       | 52d  | 28 |
| FBgn0035811 | 800.3   | 87  | 4 | IYQIYEGTSQIQR                | 52d  | 28 |
| FBgn0035811 | 588.25  | 39  | 1 | LSAWEIDQGR                   | 52d  | 28 |
| FBgn0035811 | 595.6   | 41  | 1 | SGEYPWPIIK                   | 52d  | 28 |
| FBgn0035811 | 689.02  | 42  | 1 | EEIIPVAAQYDK                 | 56d  | 28 |
| FBgn0035811 | 1172.18 | 67  | 2 | IASDAVQIFGGNGFNSEYPVEK       | 56d  | 28 |
| FBgn0035811 | 732.71  | 41  | 1 | TRPPVAAGAVGLAQR              | 56d  | 28 |
| FBgn0035830 | 1142.08 | 77  | 2 | ELGNAEPAPSVSSTTVSSPPAGVK     | 102d | 18 |
| FBgn0035872 | 1241.23 | 79  | 1 | AVSDAAAGEYSSAIETLVT AISLIK   | 82d  | 18 |
| FBgn0035872 | 1240.92 | 79  | 2 | AVSDAAAGEYSSAIETLVT AISLIK   | 2d   | 28 |
| FBgn0035872 | 870.16  | 45  | 1 | ILISLQDTLHGIEAK              | 2d   | 28 |
| FBgn0035896 | 917     | 102 | 2 | DDDESEASDFAGFDSKP            | 2d   | 18 |
| FBgn0035896 | 916.87  | 96  | 2 | DDDESEASDFAGFDSKP            | 42d  | 18 |
| FBgn0035896 | 916.83  | 71  | 1 | DDDESEASDFAGFDSKP            | 62d  | 18 |
| FBgn0035896 | 916.9   | 84  | 3 | DDDESEASDFAGFDSKP            | 82d  | 18 |
| FBgn0035896 | 917.1   | 88  | 2 | DDDESEASDFAGFDSKP            | 102d | 18 |
| FBgn0035896 | 916.87  | 80  | 2 | DDDESEASDFAGFDSKP            | 112d | 18 |
| FBgn0035896 | 916.95  | 123 | 1 | DDDESEASDFAGFDSKP            | 12d  | 28 |
| FBgn0035896 | 916.69  | 65  | 1 | DDDESEASDFAGFDSKP            | 56d  | 28 |
| FBgn0035904 | 1529.21 | 35  | 1 | GEP SLIESLIIAEYLDDKYPENPLLPK | 62d  | 18 |
| FBgn0035904 | 1529.28 | 41  | 1 | GEP SLIESLIIAEYLDDKYPENPLLPK | 112d | 18 |
| FBgn0035904 | 1529.38 | 54  | 2 | GEP SLIESLIIAEYLDDKYPENPLLPK | 12d  | 28 |
| FBgn0035904 | 1529.13 | 34  | 1 | GEP SLIESLIIAEYLDDKYPENPLLPK | 52d  | 28 |
| FBgn0035905 | 1064.22 | 66  | 1 | ASDGGDLEPFWSGLDIYER          | 2d   | 18 |
| FBgn0035905 | 652.33  | 45  | 2 | FPQLTLWLER                   | 2d   | 18 |
| FBgn0035905 | 742.31  | 42  | 1 | GSPMPDVPEDGILR               | 2d   | 18 |



|             |         |    |   |                         |      |    |
|-------------|---------|----|---|-------------------------|------|----|
| FBgn0035905 | 1064.65 | 66 | 3 | ASDGGDLEPFWSGLDIYER     | 42d  | 18 |
| FBgn0035905 | 1064.21 | 49 | 1 | ASDGGDLEPFWSGLDIYER     | 62d  | 18 |
| FBgn0035905 | 1064.54 | 36 | 1 | ASDGGDLEPFWSGLDIYER     | 102d | 18 |
| FBgn0035905 | 1064.35 | 45 | 1 | ASDGGDLEPFWSGLDIYER     | 112d | 18 |
| FBgn0035905 | 1064.63 | 61 | 1 | ASDGGDLEPFWSGLDIYER     | 2d   | 28 |
| FBgn0035905 | 742.24  | 56 | 2 | GSPMPDVPEDGILR          | 2d   | 28 |
| FBgn0035905 | 449.12  | 45 | 1 | VPALIVR                 | 2d   | 28 |
| FBgn0035906 | 892.78  | 50 | 1 | NFETALDVFEQIITK         | 82d  | 18 |
| FBgn0035906 | 971.04  | 35 | 1 | NFETALDVFEQIITKR        | 82d  | 18 |
| FBgn0035906 | 892.98  | 68 | 1 | NFETALDVFEQIITK         | 56d  | 28 |
| FBgn0035917 | 496.33  | 71 | 1 | VVGSEADTGR              | 62d  | 18 |
| FBgn0035917 | 496.09  | 71 | 1 | VVGSEADTGR              | 142d | 18 |
| FBgn0035917 | 577.07  | 53 | 2 | DAPTTESYLR              | 2d   | 28 |
| FBgn0035917 | 496.15  | 58 | 1 | VVGSEADTGR              | 2d   | 28 |
| FBgn0035917 | 496.05  | 69 | 1 | VVGSEADTGR              | 42d  | 28 |
| FBgn0035957 | 328.03  | 49 | 1 | ASVHIK                  | 112d | 18 |
| FBgn0035964 | 770.88  | 41 | 2 | SGLPAGSLAVSILPVTLDTPMNR | 42d  | 18 |
| FBgn0035966 | 1295.74 | 76 | 2 | DGGINVDEWVQEAENMGVQELTR | 2d   | 18 |
| FBgn0035966 | 879.34  | 77 | 2 | NDYVLSLAAANAHQNR        | 62d  | 18 |
| FBgn0035966 | 936.55  | 38 | 1 | TAHGVDDGWEGELDGK        | 82d  | 18 |
| FBgn0035966 | 879.54  | 53 | 1 | NDYVLSLAAANAHQNR        | 142d | 18 |
| FBgn0035966 | 879.51  | 83 | 3 | NDYVLSLAAANAHQNR        | 2d   | 28 |
| FBgn0035966 | 750.33  | 50 | 2 | TDPNDPNGPDLTK           | 2d   | 28 |
| FBgn0035966 | 744.28  | 70 | 2 | VTAEHESAAETLTK          | 2d   | 28 |
| FBgn0035966 | 1295.5  | 77 | 2 | DGGINVDEWVQEAENMGVQELTR | 12d  | 28 |
| FBgn0035966 | 879.59  | 39 | 1 | NDYVLSLAAANAHQNR        | 12d  | 28 |
| FBgn0035966 | 879.24  | 71 | 2 | NDYVLSLAAANAHQNR        | 42d  | 28 |
| FBgn0035970 | 751.76  | 46 | 1 | NQTEIENWIVKK            | 82d  | 18 |
| FBgn0035978 | 1058.04 | 39 | 1 | SDLTFLDLTVQQIEHLNK      | 2d   | 18 |
| FBgn0035978 | 1058.09 | 95 | 4 | SDLTFLDLTVQQIEHLNK      | 42d  | 18 |
| FBgn0035978 | 1058.14 | 61 | 3 | SDLTFLDLTVQQIEHLNK      | 82d  | 18 |
| FBgn0035978 | 774.36  | 93 | 1 | FIQEEGPALDWNK           | 112d | 18 |

|             |         |    |   |                             |      |    |
|-------------|---------|----|---|-----------------------------|------|----|
| FBgn0035978 | 774.42  | 77 | 2 | FIQEEGPALDWNK               | 122d | 18 |
| FBgn0035978 | 1058.08 | 73 | 2 | SDLTFLDLTVQQIEHLNK          | 132d | 18 |
| FBgn0035978 | 774.5   | 93 | 1 | FIQEEGPALDWNK               | 142d | 18 |
| FBgn0035978 | 1058.18 | 69 | 1 | SDLTFLDLTVQQIEHLNK          | 142d | 18 |
| FBgn0035978 | 1058.19 | 45 | 1 | SDLTFLDLTVQQIEHLNK          | 12d  | 28 |
| FBgn0035978 | 774.32  | 66 | 1 | FIQEEGPALDWNK               | 32d  | 28 |
| FBgn0035978 | 774.22  | 76 | 1 | FIQEEGPALDWNK               | 42d  | 28 |
| FBgn0035978 | 1058.24 | 67 | 2 | SDLTFLDLTVQQIEHLNK          | 42d  | 28 |
| FBgn0035978 | 1058.06 | 60 | 2 | SDLTFLDLTVQQIEHLNK          | 46d  | 28 |
| FBgn0035978 | 774.4   | 57 | 1 | FIQEEGPALDWNK               | 52d  | 28 |
| FBgn0035978 | 1058.07 | 77 | 2 | SDLTFLDLTVQQIEHLNK          | 56d  | 28 |
| FBgn0035985 | 905.77  | 55 | 1 | LWGELAAAAGHNPDPYAAEYQQEGR   | 42d  | 18 |
| FBgn0035989 | 884.31  | 47 | 1 | LFQTMLNEEQWTAR              | 112d | 18 |
| FBgn0035995 | 753.04  | 78 | 2 | VLSLIQIWADAFK               | 42d  | 18 |
| FBgn0036004 | 681.4   | 38 | 1 | MENEIKRNAAGK                | 32d  | 28 |
| FBgn0036030 | 708.36  | 61 | 2 | VFSGTSHPDLAQR               | 2d   | 28 |
| FBgn0036046 | 1026.15 | 52 | 1 | SALFPGSYLGGVLNSLAEVR        | 62d  | 18 |
| FBgn0036046 | 1025.97 | 53 | 1 | SALFPGSYLGGVLNSLAEVR        | 82d  | 18 |
| FBgn0036046 | 1026.23 | 35 | 1 | SALFPGSYLGGVLNSLAEVR        | 112d | 18 |
| FBgn0036046 | 1026.13 | 56 | 1 | SALFPGSYLGGVLNSLAEVR        | 132d | 18 |
| FBgn0036046 | 1025.87 | 87 | 3 | SALFPGSYLGGVLNSLAEVR        | 36d  | 28 |
| FBgn0036046 | 1025.75 | 66 | 1 | SALFPGSYLGGVLNSLAEVR        | 42d  | 28 |
| FBgn0036046 | 1026.22 | 49 | 1 | SALFPGSYLGGVLNSLAEVR        | 46d  | 28 |
| FBgn0036106 | 927.62  | 63 | 1 | ESTSEELSRPSPISPDVLDVDPKPTAK | 22d  | 18 |
| FBgn0036106 | 566.86  | 39 | 1 | ETVEKPDSVK                  | 142d | 18 |
| FBgn0036106 | 927.65  | 35 | 1 | ESTSEELSRPSPISPDVLDVDPKPTAK | 32d  | 28 |
| FBgn0036182 | 728.11  | 47 | 2 | EVPIIGLGTWGSFK              | 2d   | 18 |
| FBgn0036182 | 794.57  | 75 | 1 | TLYSPVDYVDTWK               | 2d   | 18 |
| FBgn0036182 | 582.21  | 48 | 2 | SALENTLSSLK                 | 22d  | 18 |
| FBgn0036182 | 793.9   | 81 | 4 | TLYSPVDYVDTWK               | 22d  | 18 |
| FBgn0036182 | 728.1   | 58 | 3 | EVPIIGLGTWGSFK              | 42d  | 18 |
| FBgn0036182 | 794.36  | 69 | 5 | TLYSPVDYVDTWK               | 42d  | 18 |

|             |         |    |   |                       |      |    |
|-------------|---------|----|---|-----------------------|------|----|
| FBgn0036182 | 582.05  | 44 | 1 | SALENTLSSLK           | 62d  | 18 |
| FBgn0036182 | 794.15  | 70 | 2 | TLYSPVDYVDTWK         | 62d  | 18 |
| FBgn0036182 | 571.83  | 70 | 1 | AGDPVILEEAK           | 82d  | 18 |
| FBgn0036182 | 582.51  | 53 | 4 | SALENTLSSLK           | 82d  | 18 |
| FBgn0036182 | 794.05  | 73 | 2 | TLYSPVDYVDTWK         | 82d  | 18 |
| FBgn0036182 | 727.91  | 49 | 1 | EVPIIGLGTWGSFK        | 102d | 18 |
| FBgn0036182 | 555.53  | 45 | 1 | REDLFITSK             | 102d | 18 |
| FBgn0036182 | 794.62  | 64 | 1 | TLYSPVDYVDTWK         | 102d | 18 |
| FBgn0036182 | 794.25  | 63 | 1 | TLYSPVDYVDTWK         | 112d | 18 |
| FBgn0036182 | 727.82  | 50 | 1 | EVPIIGLGTWGSFK        | 122d | 18 |
| FBgn0036182 | 582.22  | 52 | 2 | SALENTLSSLK           | 122d | 18 |
| FBgn0036182 | 794.15  | 69 | 2 | TLYSPVDYVDTWK         | 122d | 18 |
| FBgn0036182 | 571.87  | 54 | 1 | AGDPVILEEAK           | 132d | 18 |
| FBgn0036182 | 582.51  | 43 | 2 | SALENTLSSLK           | 132d | 18 |
| FBgn0036182 | 794.62  | 68 | 1 | TLYSPVDYVDTWK         | 132d | 18 |
| FBgn0036182 | 728.03  | 40 | 1 | EVPIIGLGTWGSFK        | 142d | 18 |
| FBgn0036182 | 1206.75 | 52 | 1 | HIDCAYVYQNEDEVGDGVEAK | 142d | 18 |
| FBgn0036182 | 571.55  | 59 | 3 | AGDPVILEEAK           | 2d   | 28 |
| FBgn0036182 | 727.79  | 54 | 2 | EVPIIGLGTWGSFK        | 2d   | 28 |
| FBgn0036182 | 794.25  | 63 | 2 | TLYSPVDYVDTWK         | 2d   | 28 |
| FBgn0036182 | 571.96  | 60 | 1 | AGDPVILEEAK           | 12d  | 28 |
| FBgn0036182 | 794.43  | 39 | 1 | TLYSPVDYVDTWK         | 12d  | 28 |
| FBgn0036182 | 794.29  | 73 | 2 | TLYSPVDYVDTWK         | 32d  | 28 |
| FBgn0036182 | 571.98  | 56 | 1 | AGDPVILEEAK           | 36d  | 28 |
| FBgn0036182 | 728     | 36 | 1 | EVPIIGLGTWGSFK        | 36d  | 28 |
| FBgn0036182 | 794.33  | 72 | 1 | TLYSPVDYVDTWK         | 36d  | 28 |
| FBgn0036182 | 571.83  | 48 | 2 | AGDPVILEEAK           | 42d  | 28 |
| FBgn0036182 | 794.39  | 93 | 3 | TLYSPVDYVDTWK         | 42d  | 28 |
| FBgn0036182 | 794.5   | 69 | 3 | TLYSPVDYVDTWK         | 46d  | 28 |
| FBgn0036182 | 794.24  | 73 | 3 | TLYSPVDYVDTWK         | 50d  | 28 |
| FBgn0036182 | 728.02  | 42 | 1 | EVPIIGLGTWGSFK        | 56d  | 28 |
| FBgn0036182 | 794.33  | 64 | 2 | TLYSPVDYVDTWK         | 56d  | 28 |

|             |         |     |   |                              |      |    |
|-------------|---------|-----|---|------------------------------|------|----|
| FBgn0036187 | 411.38  | 42  | 1 | AVATMTVK                     | 32d  | 28 |
| FBgn0036208 | 1143.18 | 36  | 1 | GTEEYDNVMGEVDIINSTLGK        | 22d  | 18 |
| FBgn0036208 | 1142.84 | 38  | 1 | GTEEYDNVMGEVDIINSTLGK        | 42d  | 18 |
| FBgn0036208 | 1142.8  | 58  | 2 | GTEEYDNVMGEVDIINSTLGK        | 32d  | 28 |
| FBgn0036208 | 1142.36 | 82  | 3 | GTEEYDNVMGEVDIINSTLGK        | 36d  | 28 |
| FBgn0036208 | 1143.04 | 57  | 3 | GTEEYDNVMGEVDIINSTLGK        | 42d  | 28 |
| FBgn0036208 | 1142.72 | 82  | 2 | GTEEYDNVMGEVDIINSTLGK        | 46d  | 28 |
| FBgn0036208 | 1143.08 | 117 | 3 | GTEEYDNVMGEVDIINSTLGK        | 50d  | 28 |
| FBgn0036208 | 1143.04 | 89  | 2 | GTEEYDNVMGEVDIINSTLGK        | 56d  | 28 |
| FBgn0036315 | 373.78  | 37  | 1 | LTSSPLK                      | 50d  | 28 |
| FBgn0036320 | 502.35  | 46  | 2 | MVLENKLR                     | 22d  | 18 |
| FBgn0036320 | 502.52  | 56  | 1 | MVLENKLR                     | 82d  | 18 |
| FBgn0036320 | 502.23  | 51  | 2 | MVLENKLR                     | 2d   | 28 |
| FBgn0036320 | 502.38  | 47  | 2 | MVLENKLR                     | 32d  | 28 |
| FBgn0036320 | 502.11  | 48  | 2 | MVLENKLR                     | 36d  | 28 |
| FBgn0036320 | 502.16  | 61  | 3 | MVLENKLR                     | 42d  | 28 |
| FBgn0036320 | 502.19  | 44  | 1 | MVLENKLR                     | 46d  | 28 |
| FBgn0036320 | 502.21  | 52  | 3 | MVLENKLR                     | 50d  | 28 |
| FBgn0036320 | 502.22  | 58  | 3 | MVLENKLR                     | 52d  | 28 |
| FBgn0036334 | 655.01  | 44  | 1 | NASTGNHIPIGVK                | 62d  | 18 |
| FBgn0036334 | 654.81  | 53  | 2 | NASTGNHIPIGVK                | 2d   | 28 |
| FBgn0036334 | 654.68  | 47  | 1 | NASTGNHIPIGVK                | 22d  | 28 |
| FBgn0036334 | 531.45  | 34  | 1 | VLLPEFGGTK                   | 52d  | 28 |
| FBgn0036368 | 1012.97 | 35  | 1 | CVNYTGEISAAIAGGALLLSLVSLVLYR | 36d  | 28 |
| FBgn0036389 | 427.3   | 52  | 1 | LVSGLRAPGLAPK                | 22d  | 18 |
| FBgn0036425 | 572.17  | 39  | 1 | EYICEDGEK                    | 36d  | 28 |
| FBgn0036425 | 572.17  | 39  | 2 | EYICEDGEK                    | 52d  | 28 |
| FBgn0036480 | 595.25  | 34  | 1 | NALEQNVKDLLEDQLR             | 102d | 18 |
| FBgn0036504 | 467.8   | 36  | 1 | SELASKPINNSIK                | 22d  | 28 |
| FBgn0036599 | 823.84  | 65  | 3 | TTAVHSAPVLAAPIVK             | 2d   | 18 |
| FBgn0036614 | 481.1   | 44  | 1 | LEEKANEK                     | 32d  | 28 |
| FBgn0036614 | 481.24  | 34  | 1 | LEEKANEK                     | 46d  | 28 |

|             |         |     |   |                         |      |    |
|-------------|---------|-----|---|-------------------------|------|----|
| FBgn0036616 | 617.7   | 46  | 1 | ITTTDTGIHFK             | 2d   | 18 |
| FBgn0036616 | 617.85  | 53  | 3 | ITTTDTGIHFK             | 2d   | 28 |
| FBgn0036616 | 617.53  | 64  | 1 | ITTTDTGIHFK             | 12d  | 28 |
| FBgn0036619 | 827.89  | 74  | 3 | APLPVTDTEEVQQAR         | 2d   | 18 |
| FBgn0036619 | 611.72  | 58  | 6 | GFYSYVDADGK             | 2d   | 18 |
| FBgn0036619 | 416.91  | 38  | 1 | LDNSDLR                 | 2d   | 18 |
| FBgn0036619 | 452.6   | 57  | 1 | LGDLASAEK               | 2d   | 18 |
| FBgn0036619 | 1289.04 | 99  | 2 | NNNEDQQSGEQSLTDEDAAILER | 2d   | 18 |
| FBgn0036619 | 557.3   | 53  | 1 | YEANGVQGFK              | 2d   | 18 |
| FBgn0036619 | 584.23  | 43  | 3 | YSVTTPTELR              | 2d   | 18 |
| FBgn0036619 | 827.77  | 98  | 3 | APLPVTDTEEVQQAR         | 22d  | 18 |
| FBgn0036619 | 678.34  | 59  | 3 | AEASNQPQAPVDK           | 42d  | 18 |
| FBgn0036619 | 611.83  | 49  | 1 | GFYSYVDADGK             | 42d  | 18 |
| FBgn0036619 | 678.56  | 54  | 4 | AEASNQPQAPVDK           | 62d  | 18 |
| FBgn0036619 | 828.11  | 110 | 5 | APLPVTDTEEVQQAR         | 62d  | 18 |
| FBgn0036619 | 828.06  | 83  | 2 | APLPVTDTEEVQQAR         | 82d  | 18 |
| FBgn0036619 | 677.99  | 57  | 2 | AEASNQPQAPVDK           | 102d | 18 |
| FBgn0036619 | 827.82  | 80  | 1 | APLPVTDTEEVQQAR         | 102d | 18 |
| FBgn0036619 | 678.52  | 59  | 2 | AEASNQPQAPVDK           | 142d | 18 |
| FBgn0036619 | 678.37  | 53  | 2 | AEASNQPQAPVDK           | 2d   | 28 |
| FBgn0036619 | 827.69  | 79  | 4 | APLPVTDTEEVQQAR         | 2d   | 28 |
| FBgn0036619 | 611.76  | 61  | 3 | GFYSYVDADGK             | 2d   | 28 |
| FBgn0036619 | 920.4   | 74  | 2 | GKAPLPVTDTEEVQQAR       | 2d   | 28 |
| FBgn0036619 | 557.39  | 66  | 3 | YEANGVQGFK              | 2d   | 28 |
| FBgn0036619 | 584.16  | 49  | 3 | YSVTTPTELR              | 2d   | 28 |
| FBgn0036619 | 678.3   | 60  | 2 | AEASNQPQAPVDK           | 12d  | 28 |
| FBgn0036619 | 827.61  | 110 | 2 | APLPVTDTEEVQQAR         | 12d  | 28 |
| FBgn0036619 | 611.67  | 62  | 3 | GFYSYVDADGK             | 12d  | 28 |
| FBgn0036619 | 920.34  | 86  | 2 | GKAPLPVTDTEEVQQAR       | 12d  | 28 |
| FBgn0036619 | 1289.15 | 101 | 2 | NNNEDQQSGEQSLTDEDAAILER | 12d  | 28 |
| FBgn0036619 | 584.4   | 40  | 2 | YSVTTPTELR              | 12d  | 28 |
| FBgn0036619 | 827.94  | 91  | 2 | APLPVTDTEEVQQAR         | 22d  | 28 |

|             |         |     |   |                           |     |    |
|-------------|---------|-----|---|---------------------------|-----|----|
| FBgn0036619 | 611.94  | 45  | 1 | GFYSYVDADGK               | 22d | 28 |
| FBgn0036619 | 678.12  | 65  | 1 | AEASNQPQAPVDK             | 32d | 28 |
| FBgn0036619 | 827.85  | 102 | 3 | APLPVTDTEEVQQAR           | 32d | 28 |
| FBgn0036619 | 828.08  | 91  | 3 | APLPVTDTEEVQQAR           | 36d | 28 |
| FBgn0036619 | 827.88  | 97  | 3 | APLPVTDTEEVQQAR           | 42d | 28 |
| FBgn0036619 | 611.66  | 64  | 3 | GFYSYVDADGK               | 42d | 28 |
| FBgn0036619 | 827.82  | 79  | 3 | APLPVTDTEEVQQAR           | 46d | 28 |
| FBgn0036619 | 611.66  | 60  | 3 | GFYSYVDADGK               | 46d | 28 |
| FBgn0036619 | 678.48  | 45  | 1 | AEASNQPQAPVDK             | 50d | 28 |
| FBgn0036619 | 827.97  | 101 | 3 | APLPVTDTEEVQQAR           | 50d | 28 |
| FBgn0036619 | 827.84  | 83  | 2 | APLPVTDTEEVQQAR           | 52d | 28 |
| FBgn0036619 | 678.4   | 54  | 3 | AEASNQPQAPVDK             | 56d | 28 |
| FBgn0036619 | 827.89  | 73  | 2 | APLPVTDTEEVQQAR           | 56d | 28 |
| FBgn0036642 | 620.27  | 67  | 3 | AASANWYGGDAR              | 2d  | 18 |
| FBgn0036642 | 726.61  | 75  | 2 | AVVAVAGQGAAASNHK          | 2d  | 18 |
| FBgn0036642 | 707.62  | 57  | 2 | LVVATADATLPVSR            | 2d  | 18 |
| FBgn0036642 | 802.21  | 80  | 3 | NESYDIQGASHLLR            | 2d  | 18 |
| FBgn0036642 | 590.03  | 50  | 1 | NGLGNSIYSPR               | 2d  | 18 |
| FBgn0036642 | 1271.16 | 87  | 3 | NVLEADALLGAIDGISQSQVQEAAK | 2d  | 18 |
| FBgn0036642 | 781.08  | 95  | 1 | TVVNQLNAVSTEER            | 2d  | 18 |
| FBgn0036642 | 1195.32 | 45  | 1 | YLQDLLQPAFKPWELVDNAK      | 2d  | 18 |
| FBgn0036642 | 1005.46 | 50  | 1 | GTSAGLFGEAVNCAGGVGASVK    | 22d | 18 |
| FBgn0036642 | 802.64  | 76  | 2 | NESYDIQGASHLLR            | 22d | 18 |
| FBgn0036642 | 823.87  | 70  | 2 | NIQQVGGTLTTWGDR           | 22d | 18 |
| FBgn0036642 | 1270.89 | 76  | 3 | NVLEADALLGAIDGISQSQVQEAAK | 22d | 18 |
| FBgn0036642 | 780.86  | 67  | 3 | TVVNQLNAVSTEER            | 22d | 18 |
| FBgn0036642 | 726.21  | 92  | 1 | AVVAVAGQGAAASNHK          | 42d | 18 |
| FBgn0036642 | 773.22  | 68  | 3 | EALAFQALGAK               | 42d | 18 |
| FBgn0036642 | 926.92  | 42  | 1 | LAVGAIGHLANVPYASDLA       | 42d | 18 |
| FBgn0036642 | 823.78  | 67  | 2 | NIQQVGGTLTTWGDR           | 42d | 18 |
| FBgn0036642 | 1271.38 | 86  | 6 | NVLEADALLGAIDGISQSQVQEAAK | 42d | 18 |
| FBgn0036642 | 726.41  | 91  | 3 | AVVAVAGQGAAASNHK          | 62d | 18 |

|             |         |     |   |                           |      |    |
|-------------|---------|-----|---|---------------------------|------|----|
| FBgn0036642 | 802.51  | 74  | 2 | NESYDIQGASHLLR            | 62d  | 18 |
| FBgn0036642 | 1271.04 | 85  | 1 | NVLEADALLGAIDGISQSQVQEAAK | 62d  | 18 |
| FBgn0036642 | 432.93  | 35  | 1 | TVEFLVR                   | 62d  | 18 |
| FBgn0036642 | 707.37  | 66  | 1 | LVVATADATLPVSR            | 82d  | 18 |
| FBgn0036642 | 802.34  | 71  | 1 | NESYDIQGASHLLR            | 82d  | 18 |
| FBgn0036642 | 823.8   | 87  | 2 | NIQQVGGTLTTWGDR           | 82d  | 18 |
| FBgn0036642 | 1271.3  | 87  | 1 | NVLEADALLGAIDGISQSQVQEAAK | 82d  | 18 |
| FBgn0036642 | 780.83  | 65  | 1 | TVVNQLNAVSTEER            | 82d  | 18 |
| FBgn0036642 | 1005.56 | 82  | 1 | GTSAGLFGAEAVNCAGGVGASVK   | 102d | 18 |
| FBgn0036642 | 802.33  | 47  | 2 | NESYDIQGASHLLR            | 102d | 18 |
| FBgn0036642 | 823.83  | 74  | 3 | NIQQVGGTLTTWGDR           | 102d | 18 |
| FBgn0036642 | 1271.16 | 100 | 3 | NVLEADALLGAIDGISQSQVQEAAK | 102d | 18 |
| FBgn0036642 | 780.79  | 79  | 2 | TVVNQLNAVSTEER            | 102d | 18 |
| FBgn0036642 | 726.58  | 35  | 1 | AVVAVAGQGAAASNHK          | 112d | 18 |
| FBgn0036642 | 1005.64 | 88  | 1 | GTSAGLFGAEAVNCAGGVGASVK   | 112d | 18 |
| FBgn0036642 | 802.57  | 77  | 2 | NESYDIQGASHLLR            | 112d | 18 |
| FBgn0036642 | 823.67  | 79  | 3 | NIQQVGGTLTTWGDR           | 112d | 18 |
| FBgn0036642 | 1270.99 | 98  | 2 | NVLEADALLGAIDGISQSQVQEAAK | 112d | 18 |
| FBgn0036642 | 515.54  | 39  | 1 | EALAFaILEQALGAK           | 122d | 18 |
| FBgn0036642 | 823.45  | 71  | 3 | NIQQVGGTLTTWGDR           | 122d | 18 |
| FBgn0036642 | 1271.35 | 72  | 1 | NVLEADALLGAIDGISQSQVQEAAK | 122d | 18 |
| FBgn0036642 | 1195.34 | 41  | 1 | YLQDLLQPAFKPWELVDNAK      | 122d | 18 |
| FBgn0036642 | 1005.54 | 75  | 1 | GTSAGLFGAEAVNCAGGVGASVK   | 132d | 18 |
| FBgn0036642 | 802.42  | 70  | 2 | NESYDIQGASHLLR            | 132d | 18 |
| FBgn0036642 | 824.03  | 56  | 2 | NIQQVGGTLTTWGDR           | 132d | 18 |
| FBgn0036642 | 797.11  | 46  | 1 | YLQDLLQPAFKPWELVDNAK      | 132d | 18 |
| FBgn0036642 | 726.62  | 74  | 1 | AVVAVAGQGAAASNHK          | 142d | 18 |
| FBgn0036642 | 802.42  | 64  | 2 | NESYDIQGASHLLR            | 142d | 18 |
| FBgn0036642 | 823.92  | 73  | 2 | NIQQVGGTLTTWGDR           | 142d | 18 |
| FBgn0036642 | 1271.22 | 61  | 1 | NVLEADALLGAIDGISQSQVQEAAK | 142d | 18 |
| FBgn0036642 | 726.17  | 89  | 2 | AVVAVAGQGAAASNHK          | 2d   | 28 |
| FBgn0036642 | 707.3   | 84  | 3 | LVVATADATLPVSR            | 2d   | 28 |

|             |         |     |   |                           |     |    |
|-------------|---------|-----|---|---------------------------|-----|----|
| FBgn0036642 | 802.15  | 85  | 3 | NESYDIQGASHLLR            | 2d  | 28 |
| FBgn0036642 | 590.01  | 60  | 2 | NGLGNSIYSPR               | 2d  | 28 |
| FBgn0036642 | 823.67  | 67  | 2 | NIQQVGGTLTTWGDR           | 2d  | 28 |
| FBgn0036642 | 1271.39 | 92  | 2 | NVLEADALLGAIDGISQSQVQEAAK | 2d  | 28 |
| FBgn0036642 | 780.86  | 95  | 1 | TVVNQLNAVSTEER            | 2d  | 28 |
| FBgn0036642 | 797.06  | 42  | 1 | YLQDLLQPAFKPWELVDNAK      | 2d  | 28 |
| FBgn0036642 | 773.53  | 70  | 1 | EALAFaILEQALGAK           | 12d | 28 |
| FBgn0036642 | 707.29  | 43  | 1 | LVVATADATLPVSR            | 12d | 28 |
| FBgn0036642 | 802.29  | 75  | 3 | NESYDIQGASHLLR            | 12d | 28 |
| FBgn0036642 | 823.87  | 37  | 1 | NIQQVGGTLTTWGDR           | 12d | 28 |
| FBgn0036642 | 1271    | 86  | 1 | NVLEADALLGAIDGISQSQVQEAAK | 12d | 28 |
| FBgn0036642 | 1195.34 | 44  | 2 | YLQDLLQPAFKPWELVDNAK      | 12d | 28 |
| FBgn0036642 | 707.65  | 43  | 1 | LVVATADATLPVSR            | 22d | 28 |
| FBgn0036642 | 802.3   | 63  | 2 | NESYDIQGASHLLR            | 22d | 28 |
| FBgn0036642 | 824.1   | 91  | 3 | NIQQVGGTLTTWGDR           | 22d | 28 |
| FBgn0036642 | 1271.39 | 79  | 1 | NVLEADALLGAIDGISQSQVQEAAK | 22d | 28 |
| FBgn0036642 | 796.97  | 39  | 1 | YLQDLLQPAFKPWELVDNAK      | 22d | 28 |
| FBgn0036642 | 802.29  | 72  | 1 | NESYDIQGASHLLR            | 32d | 28 |
| FBgn0036642 | 589.99  | 56  | 1 | NGLGNSIYSPR               | 32d | 28 |
| FBgn0036642 | 823.78  | 95  | 2 | NIQQVGGTLTTWGDR           | 32d | 28 |
| FBgn0036642 | 1271.25 | 71  | 2 | NVLEADALLGAIDGISQSQVQEAAK | 32d | 28 |
| FBgn0036642 | 780.84  | 86  | 1 | TVVNQLNAVSTEER            | 32d | 28 |
| FBgn0036642 | 797.26  | 34  | 1 | YLQDLLQPAFKPWELVDNAK      | 32d | 28 |
| FBgn0036642 | 707.21  | 40  | 2 | LVVATADATLPVSR            | 36d | 28 |
| FBgn0036642 | 802.26  | 74  | 2 | NESYDIQGASHLLR            | 36d | 28 |
| FBgn0036642 | 589.97  | 68  | 1 | NGLGNSIYSPR               | 36d | 28 |
| FBgn0036642 | 823.62  | 79  | 2 | NIQQVGGTLTTWGDR           | 36d | 28 |
| FBgn0036642 | 1271.39 | 85  | 2 | NVLEADALLGAIDGISQSQVQEAAK | 36d | 28 |
| FBgn0036642 | 780.91  | 122 | 1 | TVVNQLNAVSTEER            | 36d | 28 |
| FBgn0036642 | 620.52  | 59  | 1 | AASANWYGGDAR              | 42d | 28 |
| FBgn0036642 | 726.03  | 76  | 2 | AVVAVAGQGAAASNHK          | 42d | 28 |
| FBgn0036642 | 707.64  | 73  | 1 | LVVATADATLPVSR            | 42d | 28 |



|             |         |    |   |                                |      |    |
|-------------|---------|----|---|--------------------------------|------|----|
| FBgn0036642 | 802.15  | 95 | 3 | NESYDIQGASHLLR                 | 42d  | 28 |
| FBgn0036642 | 824.16  | 87 | 2 | NIQQVGGTLTTWGDR                | 42d  | 28 |
| FBgn0036642 | 1271.12 | 69 | 2 | NVLEADALLGAIDGISQSQVQEAAK      | 42d  | 28 |
| FBgn0036642 | 620.5   | 57 | 3 | AASANWYGGDAR                   | 46d  | 28 |
| FBgn0036642 | 802.32  | 70 | 1 | NESYDIQGASHLLR                 | 46d  | 28 |
| FBgn0036642 | 823.64  | 83 | 3 | NIQQVGGTLTTWGDR                | 46d  | 28 |
| FBgn0036642 | 1271.27 | 64 | 1 | NVLEADALLGAIDGISQSQVQEAAK      | 46d  | 28 |
| FBgn0036642 | 797.22  | 35 | 1 | YLQDLLQPAFKPWELVDNAK           | 46d  | 28 |
| FBgn0036642 | 535.41  | 77 | 3 | NESYDIQGASHLLR                 | 50d  | 28 |
| FBgn0036642 | 823.85  | 64 | 2 | NIQQVGGTLTTWGDR                | 50d  | 28 |
| FBgn0036642 | 1271.24 | 89 | 1 | NVLEADALLGAIDGISQSQVQEAAK      | 50d  | 28 |
| FBgn0036642 | 780.76  | 69 | 1 | TVVNQLNAVSTEER                 | 50d  | 28 |
| FBgn0036642 | 797.17  | 40 | 1 | YLQDLLQPAFKPWELVDNAK           | 50d  | 28 |
| FBgn0036642 | 707.42  | 54 | 1 | LVVATADATLPVSR                 | 52d  | 28 |
| FBgn0036642 | 802.17  | 68 | 2 | NESYDIQGASHLLR                 | 52d  | 28 |
| FBgn0036642 | 823.99  | 99 | 3 | NIQQVGGTLTTWGDR                | 52d  | 28 |
| FBgn0036642 | 1271.24 | 79 | 2 | NVLEADALLGAIDGISQSQVQEAAK      | 52d  | 28 |
| FBgn0036642 | 780.94  | 79 | 1 | TVVNQLNAVSTEER                 | 52d  | 28 |
| FBgn0036642 | 726.04  | 89 | 1 | AVVAVAGQGAAASNHK               | 56d  | 28 |
| FBgn0036642 | 802.37  | 77 | 3 | NESYDIQGASHLLR                 | 56d  | 28 |
| FBgn0036642 | 824.07  | 71 | 2 | NIQQVGGTLTTWGDR                | 56d  | 28 |
| FBgn0036642 | 1271.36 | 91 | 1 | NVLEADALLGAIDGISQSQVQEAAK      | 56d  | 28 |
| FBgn0036642 | 780.73  | 95 | 1 | TVVNQLNAVSTEER                 | 56d  | 28 |
| FBgn0036663 | 983.78  | 49 | 1 | IWLTPILSIPDTQLLK               | 2d   | 18 |
| FBgn0036663 | 855.61  | 41 | 1 | VNPESVELLPLEIEK                | 22d  | 18 |
| FBgn0036663 | 983.82  | 51 | 1 | IWLTPILSIPDTQLLK               | 42d  | 18 |
| FBgn0036663 | 1088.56 | 60 | 1 | LLLQPALELRPGTNIVGGSVK          | 42d  | 18 |
| FBgn0036663 | 1097.04 | 45 | 3 | SVPGVGLISPPPHHDIYSIEDLAELIYDLK | 42d  | 18 |
| FBgn0036663 | 815.5   | 38 | 1 | DIEEAIQDVVLEQK                 | 62d  | 18 |
| FBgn0036663 | 983.59  | 54 | 2 | IWLTPILSIPDTQLLK               | 82d  | 18 |
| FBgn0036663 | 1088.52 | 35 | 1 | LLLQPALELRPGTNIVGGSVK          | 82d  | 18 |
| FBgn0036663 | 815.55  | 55 | 1 | DIEEAIQDVVLEQK                 | 102d | 18 |

|             |         |    |   |                                |      |    |
|-------------|---------|----|---|--------------------------------|------|----|
| FBgn0036663 | 983.67  | 38 | 1 | IWLTPILSIPDTQLLK               | 102d | 18 |
| FBgn0036663 | 872.15  | 45 | 1 | QSIDISEVEPASEIVK               | 102d | 18 |
| FBgn0036663 | 684.4   | 37 | 1 | AQDNPWPQWPK                    | 112d | 18 |
| FBgn0036663 | 983.8   | 51 | 1 | IWLTPILSIPDTQLLK               | 112d | 18 |
| FBgn0036663 | 684.51  | 39 | 1 | AQDNPWPQWPK                    | 122d | 18 |
| FBgn0036663 | 815.29  | 47 | 1 | DIEEAIQDVVLEQK                 | 122d | 18 |
| FBgn0036663 | 983.71  | 37 | 1 | IWLTPILSIPDTQLLK               | 122d | 18 |
| FBgn0036663 | 797.53  | 59 | 1 | AQQIFSGADDNVTVK                | 132d | 18 |
| FBgn0036663 | 855.45  | 42 | 1 | VNPESVELLPLEIEK                | 132d | 18 |
| FBgn0036663 | 684.27  | 39 | 1 | AQDNPWPQWPK                    | 142d | 18 |
| FBgn0036663 | 983.76  | 41 | 1 | IWLTPILSIPDTQLLK               | 142d | 18 |
| FBgn0036663 | 797.39  | 49 | 1 | AQQIFSGADDNVTVK                | 2d   | 28 |
| FBgn0036663 | 815.62  | 37 | 1 | DIEEAIQDVVLEQK                 | 2d   | 28 |
| FBgn0036663 | 983.57  | 63 | 1 | IWLTPILSIPDTQLLK               | 2d   | 28 |
| FBgn0036663 | 913.72  | 93 | 2 | VAIVGSGPSGLAASQQLNR            | 2d   | 28 |
| FBgn0036663 | 855.54  | 55 | 2 | VNPESVELLPLEIEK                | 2d   | 28 |
| FBgn0036663 | 983.78  | 50 | 1 | IWLTPILSIPDTQLLK               | 12d  | 28 |
| FBgn0036663 | 726.19  | 53 | 3 | LLLQPALELRPGTNIVGGSVK          | 12d  | 28 |
| FBgn0036663 | 1096.8  | 46 | 1 | SVPGVGLISPPPHHDIYSIEDLAELIYDLK | 12d  | 28 |
| FBgn0036663 | 913.48  | 82 | 1 | VAIVGSGPSGLAASQQLNR            | 12d  | 28 |
| FBgn0036663 | 983.19  | 58 | 2 | IWLTPILSIPDTQLLK               | 22d  | 28 |
| FBgn0036663 | 983.79  | 66 | 2 | IWLTPILSIPDTQLLK               | 32d  | 28 |
| FBgn0036663 | 1088.59 | 58 | 1 | LLLQPALELRPGTNIVGGSVK          | 32d  | 28 |
| FBgn0036663 | 950.93  | 35 | 1 | WNDLVFHGEWQEALR                | 32d  | 28 |
| FBgn0036663 | 797.59  | 45 | 1 | AQQIFSGADDNVTVK                | 36d  | 28 |
| FBgn0036663 | 983.68  | 52 | 2 | IWLTPILSIPDTQLLK               | 36d  | 28 |
| FBgn0036663 | 782.82  | 46 | 1 | HGGEAHINEPSSIGSLQEAAVNK        | 42d  | 28 |
| FBgn0036663 | 983.64  | 54 | 1 | IWLTPILSIPDTQLLK               | 42d  | 28 |
| FBgn0036663 | 855.47  | 48 | 1 | VNPESVELLPLEIEK                | 42d  | 28 |
| FBgn0036663 | 983.63  | 75 | 1 | IWLTPILSIPDTQLLK               | 46d  | 28 |
| FBgn0036663 | 1088.77 | 46 | 1 | LLLQPALELRPGTNIVGGSVK          | 46d  | 28 |
| FBgn0036663 | 855.38  | 42 | 1 | VNPESVELLPLEIEK                | 46d  | 28 |

|             |         |     |   |                                   |      |    |
|-------------|---------|-----|---|-----------------------------------|------|----|
| FBgn0036663 | 797.42  | 62  | 1 | AQQIFSGADDNVTVK                   | 50d  | 28 |
| FBgn0036663 | 983.65  | 48  | 1 | IWLTPILSIPDTQLLK                  | 50d  | 28 |
| FBgn0036663 | 983.45  | 79  | 3 | IWLTPILSIPDTQLLK                  | 52d  | 28 |
| FBgn0036663 | 1088.89 | 47  | 1 | LLLQPALELRPGTNIVGGSVK             | 52d  | 28 |
| FBgn0036663 | 983.49  | 68  | 1 | IWLTPILSIPDTQLLK                  | 56d  | 28 |
| FBgn0036702 | 1128.32 | 36  | 1 | TEPLDAGSTPSSPPTKPVTAQSS           | 122d | 18 |
| FBgn0036718 | 509.63  | 37  | 1 | LSIGAMANIK                        | 46d  | 28 |
| FBgn0036726 | 1111.45 | 109 | 3 | DTFQDFAQSPAIAAGGAESSPPK           | 2d   | 18 |
| FBgn0036726 | 1111.64 | 88  | 3 | DTFQDFAQSPAIAAGGAESSPPK           | 42d  | 18 |
| FBgn0036726 | 741.34  | 47  | 1 | DTFQDFAQSPAIAAGGAESSPPK           | 62d  | 18 |
| FBgn0036726 | 1111.51 | 89  | 1 | DTFQDFAQSPAIAAGGAESSPPK           | 82d  | 18 |
| FBgn0036726 | 1111.44 | 81  | 2 | DTFQDFAQSPAIAAGGAESSPPK           | 102d | 18 |
| FBgn0036726 | 741.5   | 50  | 1 | DTFQDFAQSPAIAAGGAESSPPK           | 132d | 18 |
| FBgn0036726 | 1111.69 | 86  | 3 | DTFQDFAQSPAIAAGGAESSPPK           | 2d   | 28 |
| FBgn0036726 | 1111.5  | 66  | 2 | DTFQDFAQSPAIAAGGAESSPPK           | 12d  | 28 |
| FBgn0036726 | 1111.48 | 62  | 2 | DTFQDFAQSPAIAAGGAESSPPK           | 42d  | 28 |
| FBgn0036726 | 1111.17 | 53  | 1 | DTFQDFAQSPAIAAGGAESSPPK           | 50d  | 28 |
| FBgn0036726 | 1111.54 | 67  | 2 | DTFQDFAQSPAIAAGGAESSPPK           | 56d  | 28 |
| FBgn0036741 | 405.42  | 37  | 1 | MIPTAAGLPTS                       | 36d  | 28 |
| FBgn0036762 | 1662.04 | 62  | 3 | ILGTHIIGPGAGELINEAVLAMEYGAAAEDVAR | 2d   | 18 |
| FBgn0036762 | 852.1   | 68  | 2 | RPYTEGLGLEAVGIVK                  | 2d   | 18 |
| FBgn0036762 | 1023.72 | 51  | 1 | VTQLTGFGTIVNPNEVEVK               | 2d   | 18 |
| FBgn0036762 | 852.09  | 88  | 2 | RPYTEGLGLEAVGIVK                  | 22d  | 18 |
| FBgn0036762 | 1023.58 | 46  | 2 | VTQLTGFGTIVNPNEVEVK               | 22d  | 18 |
| FBgn0036762 | 725.29  | 50  | 1 | EANVAAAFGKPINF                    | 42d  | 18 |
| FBgn0036762 | 1108.38 | 50  | 4 | ILGTHIIGPGAGELINEAVLAMEYGAAAEDVAR | 42d  | 18 |
| FBgn0036762 | 852.02  | 70  | 2 | RPYTEGLGLEAVGIVK                  | 42d  | 18 |
| FBgn0036762 | 481.29  | 52  | 3 | VLADQATDK                         | 42d  | 18 |
| FBgn0036762 | 1023.51 | 65  | 3 | VTQLTGFGTIVNPNEVEVK               | 42d  | 18 |
| FBgn0036762 | 1108.1  | 50  | 1 | ILGTHIIGPGAGELINEAVLAMEYGAAAEDVAR | 62d  | 18 |
| FBgn0036762 | 568.32  | 84  | 2 | RPYTEGLGLEAVGIVK                  | 62d  | 18 |
| FBgn0036762 | 556.36  | 59  | 1 | TNNDTDGFFVK                       | 62d  | 18 |

|             |         |     |   |                                   |      |    |
|-------------|---------|-----|---|-----------------------------------|------|----|
| FBgn0036762 | 1023.46 | 53  | 3 | VTQLTGFGTIVNPNEVEVK               | 62d  | 18 |
| FBgn0036762 | 851.97  | 102 | 2 | RPYTEGLGLEAVGIVK                  | 82d  | 18 |
| FBgn0036762 | 660.71  | 53  | 1 | SGDNVTVSVENAK                     | 82d  | 18 |
| FBgn0036762 | 1023.61 | 56  | 1 | VTQLTGFGTIVNPNEVEVK               | 82d  | 18 |
| FBgn0036762 | 889.25  | 90  | 3 | EATLGGTCLNVGCIPSK                 | 102d | 18 |
| FBgn0036762 | 480.9   | 61  | 1 | VLADQATDK                         | 102d | 18 |
| FBgn0036762 | 1023.78 | 47  | 1 | VTQLTGFGTIVNPNEVEVK               | 102d | 18 |
| FBgn0036762 | 1108.24 | 50  | 1 | ILGTHIIGPGAGELINEAVLAMEYGAAAEDVAR | 112d | 18 |
| FBgn0036762 | 851.98  | 61  | 1 | RPYTEGLGLEAVGIVK                  | 112d | 18 |
| FBgn0036762 | 996.03  | 62  | 1 | SGEKEEIQCDALLVSVGR                | 112d | 18 |
| FBgn0036762 | 1661.75 | 58  | 1 | ILGTHIIGPGAGELINEAVLAMEYGAAAEDVAR | 122d | 18 |
| FBgn0036762 | 481.39  | 47  | 2 | VLADQATDK                         | 122d | 18 |
| FBgn0036762 | 1023.6  | 71  | 2 | VTQLTGFGTIVNPNEVEVK               | 122d | 18 |
| FBgn0036762 | 481.38  | 43  | 1 | VLADQATDK                         | 132d | 18 |
| FBgn0036762 | 889.61  | 58  | 1 | EATLGGTCLNVGCIPSK                 | 142d | 18 |
| FBgn0036762 | 851.78  | 53  | 1 | RPYTEGLGLEAVGIVK                  | 142d | 18 |
| FBgn0036762 | 1023.47 | 65  | 1 | VTQLTGFGTIVNPNEVEVK               | 142d | 18 |
| FBgn0036762 | 851.89  | 77  | 3 | RPYTEGLGLEAVGIVK                  | 2d   | 28 |
| FBgn0036762 | 755.32  | 55  | 2 | SEEQLKQEGVAYK                     | 2d   | 28 |
| FBgn0036762 | 660.51  | 81  | 4 | SGDNVTVSVENAK                     | 2d   | 28 |
| FBgn0036762 | 1023.78 | 54  | 1 | VTQLTGFGTIVNPNEVEVK               | 2d   | 28 |
| FBgn0036762 | 1661.83 | 41  | 2 | ILGTHIIGPGAGELINEAVLAMEYGAAAEDVAR | 12d  | 28 |
| FBgn0036762 | 851.95  | 79  | 2 | RPYTEGLGLEAVGIVK                  | 12d  | 28 |
| FBgn0036762 | 755.22  | 68  | 3 | SEEQLKQEGVAYK                     | 12d  | 28 |
| FBgn0036762 | 1023.65 | 48  | 1 | VTQLTGFGTIVNPNEVEVK               | 12d  | 28 |
| FBgn0036762 | 851.93  | 95  | 2 | RPYTEGLGLEAVGIVK                  | 22d  | 28 |
| FBgn0036762 | 1023.71 | 44  | 1 | VTQLTGFGTIVNPNEVEVK               | 22d  | 28 |
| FBgn0036762 | 851.96  | 94  | 1 | RPYTEGLGLEAVGIVK                  | 32d  | 28 |
| FBgn0036762 | 556.35  | 59  | 1 | TNNDTDGFVK                        | 32d  | 28 |
| FBgn0036762 | 1023.7  | 65  | 2 | VTQLTGFGTIVNPNEVEVK               | 32d  | 28 |
| FBgn0036762 | 889.38  | 54  | 1 | EATLGGTCLNVGCIPSK                 | 36d  | 28 |
| FBgn0036762 | 1108.4  | 72  | 1 | ILGTHIIGPGAGELINEAVLAMEYGAAAEDVAR | 36d  | 28 |

|             |         |     |   |                                   |      |    |
|-------------|---------|-----|---|-----------------------------------|------|----|
| FBgn0036762 | 852.05  | 89  | 3 | RPYTEGLGLEAVGIVK                  | 36d  | 28 |
| FBgn0036762 | 682.83  | 45  | 1 | VTQLTGFGTIVNPNEVEVK               | 36d  | 28 |
| FBgn0036762 | 1108.27 | 62  | 2 | ILGTHIIGPGAGELINEAVLAMEYGAAAEDVAR | 42d  | 28 |
| FBgn0036762 | 851.91  | 68  | 2 | RPYTEGLGLEAVGIVK                  | 42d  | 28 |
| FBgn0036762 | 1023.41 | 42  | 1 | VTQLTGFGTIVNPNEVEVK               | 42d  | 28 |
| FBgn0036762 | 852.08  | 86  | 3 | RPYTEGLGLEAVGIVK                  | 46d  | 28 |
| FBgn0036762 | 995.88  | 108 | 1 | SGEKEEIQCDALLVSVGR                | 46d  | 28 |
| FBgn0036762 | 1023.55 | 49  | 1 | VTQLTGFGTIVNPNEVEVK               | 46d  | 28 |
| FBgn0036762 | 852.01  | 98  | 3 | RPYTEGLGLEAVGIVK                  | 50d  | 28 |
| FBgn0036762 | 660.89  | 37  | 1 | SGDNVTVSVENAK                     | 50d  | 28 |
| FBgn0036762 | 1023.59 | 41  | 1 | VTQLTGFGTIVNPNEVEVK               | 50d  | 28 |
| FBgn0036762 | 889.54  | 65  | 2 | EATLGGTCLNVGCIPSK                 | 52d  | 28 |
| FBgn0036762 | 1661.76 | 60  | 1 | ILGTHIIGPGAGELINEAVLAMEYGAAAEDVAR | 52d  | 28 |
| FBgn0036762 | 1023.54 | 58  | 1 | VTQLTGFGTIVNPNEVEVK               | 52d  | 28 |
| FBgn0036762 | 755.39  | 75  | 1 | SEEQLKQEGVAYK                     | 56d  | 28 |
| FBgn0036762 | 1023.69 | 47  | 2 | VTQLTGFGTIVNPNEVEVK               | 56d  | 28 |
| FBgn0036824 | 634.22  | 42  | 1 | LAQEQIQPLVK                       | 22d  | 18 |
| FBgn0036824 | 549.56  | 62  | 2 | YAAGFLNEGR                        | 22d  | 18 |
| FBgn0036824 | 720.68  | 44  | 1 | ETPGLIVNKPEDK                     | 42d  | 18 |
| FBgn0036824 | 1191.62 | 66  | 3 | IDPAVAAFVDIHNTLVNSLMIK            | 42d  | 18 |
| FBgn0036824 | 634.44  | 41  | 1 | LAQEQIQPLVK                       | 42d  | 18 |
| FBgn0036824 | 831.32  | 82  | 2 | VPEENILGTFGHGYK                   | 42d  | 18 |
| FBgn0036824 | 549.92  | 52  | 2 | YAAGFLNEGR                        | 42d  | 18 |
| FBgn0036824 | 634.29  | 44  | 1 | LAQEQIQPLVK                       | 62d  | 18 |
| FBgn0036824 | 831.59  | 70  | 2 | VPEENILGTFGHGYK                   | 62d  | 18 |
| FBgn0036824 | 549.81  | 63  | 2 | YAAGFLNEGR                        | 62d  | 18 |
| FBgn0036824 | 544.25  | 60  | 2 | YYASEVAQR                         | 62d  | 18 |
| FBgn0036824 | 720.83  | 54  | 2 | ETPGLIVNKPEDK                     | 82d  | 18 |
| FBgn0036824 | 634.34  | 51  | 1 | LAQEQIQPLVK                       | 82d  | 18 |
| FBgn0036824 | 549.66  | 40  | 1 | YAAGFLNEGR                        | 82d  | 18 |
| FBgn0036824 | 543.66  | 54  | 1 | YYASEVAQR                         | 82d  | 18 |
| FBgn0036824 | 831.39  | 65  | 2 | VPEENILGTFGHGYK                   | 102d | 18 |

|             |        |    |   |                 |      |    |
|-------------|--------|----|---|-----------------|------|----|
| FBgn0036824 | 720.93 | 40 | 1 | ETPGLIVNKPEDK   | 112d | 18 |
| FBgn0036824 | 554.58 | 57 | 2 | VPEENILGTFGHGYK | 112d | 18 |
| FBgn0036824 | 721.04 | 42 | 2 | ETPGLIVNKPEDK   | 122d | 18 |
| FBgn0036824 | 831.56 | 63 | 3 | VPEENILGTFGHGYK | 122d | 18 |
| FBgn0036824 | 549.78 | 63 | 1 | YAAGFLNEGR      | 122d | 18 |
| FBgn0036824 | 735.52 | 55 | 1 | ASGTCQLTFDNVR   | 132d | 18 |
| FBgn0036824 | 721.02 | 44 | 3 | ETPGLIVNKPEDK   | 132d | 18 |
| FBgn0036824 | 554.75 | 46 | 2 | VPEENILGTFGHGYK | 132d | 18 |
| FBgn0036824 | 720.83 | 45 | 1 | ETPGLIVNKPEDK   | 142d | 18 |
| FBgn0036824 | 634.48 | 40 | 1 | LAQEIQPLVK      | 142d | 18 |
| FBgn0036824 | 831.38 | 76 | 3 | VPEENILGTFGHGYK | 142d | 18 |
| FBgn0036824 | 720.82 | 64 | 2 | ETPGLIVNKPEDK   | 2d   | 28 |
| FBgn0036824 | 634.15 | 54 | 3 | LAQEIQPLVK      | 2d   | 28 |
| FBgn0036824 | 554.72 | 46 | 2 | VPEENILGTFGHGYK | 2d   | 28 |
| FBgn0036824 | 721.07 | 54 | 1 | ETPGLIVNKPEDK   | 12d  | 28 |
| FBgn0036824 | 831.57 | 77 | 3 | VPEENILGTFGHGYK | 12d  | 28 |
| FBgn0036824 | 549.65 | 48 | 1 | YAAGFLNEGR      | 12d  | 28 |
| FBgn0036824 | 634.2  | 46 | 1 | LAQEIQPLVK      | 22d  | 28 |
| FBgn0036824 | 554.6  | 49 | 2 | VPEENILGTFGHGYK | 22d  | 28 |
| FBgn0036824 | 720.76 | 50 | 2 | ETPGLIVNKPEDK   | 32d  | 28 |
| FBgn0036824 | 831.47 | 69 | 3 | VPEENILGTFGHGYK | 32d  | 28 |
| FBgn0036824 | 549.71 | 52 | 1 | YAAGFLNEGR      | 32d  | 28 |
| FBgn0036824 | 544.33 | 56 | 2 | YYASEVAQR       | 32d  | 28 |
| FBgn0036824 | 831.46 | 70 | 3 | VPEENILGTFGHGYK | 36d  | 28 |
| FBgn0036824 | 549.72 | 66 | 3 | YAAGFLNEGR      | 36d  | 28 |
| FBgn0036824 | 544.16 | 63 | 2 | YYASEVAQR       | 36d  | 28 |
| FBgn0036824 | 720.64 | 56 | 2 | ETPGLIVNKPEDK   | 42d  | 28 |
| FBgn0036824 | 634.5  | 44 | 2 | LAQEIQPLVK      | 42d  | 28 |
| FBgn0036824 | 831.53 | 87 | 2 | VPEENILGTFGHGYK | 42d  | 28 |
| FBgn0036824 | 549.98 | 64 | 2 | YAAGFLNEGR      | 42d  | 28 |
| FBgn0036824 | 544.2  | 59 | 2 | YYASEVAQR       | 42d  | 28 |
| FBgn0036824 | 720.84 | 46 | 3 | ETPGLIVNKPEDK   | 46d  | 28 |

|             |         |    |   |                                  |      |    |
|-------------|---------|----|---|----------------------------------|------|----|
| FBgn0036824 | 794.75  | 35 | 1 | IDPAVAAFVDIHNTLVNSLMIK           | 46d  | 28 |
| FBgn0036824 | 831.54  | 71 | 1 | VPEENILGTFGHGYK                  | 46d  | 28 |
| FBgn0036824 | 549.9   | 49 | 2 | YAAGFLNEGR                       | 46d  | 28 |
| FBgn0036824 | 544.23  | 63 | 3 | YYASEVAQR                        | 46d  | 28 |
| FBgn0036824 | 720.73  | 66 | 3 | ETPGLIVNKPEDK                    | 50d  | 28 |
| FBgn0036824 | 831.56  | 74 | 3 | VPEENILGTFGHGYK                  | 50d  | 28 |
| FBgn0036824 | 549.7   | 55 | 2 | YAAGFLNEGR                       | 50d  | 28 |
| FBgn0036824 | 721.07  | 67 | 3 | ETPGLIVNKPEDK                    | 52d  | 28 |
| FBgn0036824 | 634.25  | 38 | 1 | LAQEIQPLVK                       | 52d  | 28 |
| FBgn0036824 | 720.88  | 45 | 2 | ETPGLIVNKPEDK                    | 56d  | 28 |
| FBgn0036857 | 1050.78 | 46 | 1 | QGNVQELEHTIGLAVEAYK              | 102d | 18 |
| FBgn0036857 | 838.26  | 42 | 1 | GPSVTSYDPGTGQPIAK                | 36d  | 28 |
| FBgn0036857 | 838.29  | 68 | 1 | GPSVTSYDPGTGQPIAK                | 42d  | 28 |
| FBgn0036857 | 838.62  | 63 | 3 | GPSVTSYDPGTGQPIAK                | 52d  | 28 |
| FBgn0036857 | 1050.72 | 70 | 1 | QGNVQELEHTIGLAVEAYK              | 56d  | 28 |
| FBgn0036870 | 758.41  | 48 | 1 | TFNGIAAAPVIAQVPVAPAPVLR          | 2d   | 28 |
| FBgn0036889 | 393.17  | 36 | 1 | DQLALVK                          | 32d  | 28 |
| FBgn0036892 | 1301.37 | 40 | 1 | GYQGDPSALLELLDPEQANFLDHYLDPVDLSR | 2d   | 18 |
| FBgn0036892 | 1412.02 | 35 | 1 | EGEHFPVNADNLTTFLGKQIFSSDR        | 112d | 18 |
| FBgn0036892 | 1301.44 | 35 | 1 | GYQGDPSALLELLDPEQANFLDHYLDPVDLSR | 12d  | 28 |
| FBgn0036927 | 1020.36 | 58 | 1 | LDVPSFDWPIASFPEYR                | 2d   | 18 |
| FBgn0036927 | 1148.78 | 43 | 2 | LQLGGYFHNDDFIPNEPYR              | 2d   | 18 |
| FBgn0036927 | 1380.39 | 62 | 3 | NPVAGIVVEPIQSEGGDNEASPEFFR       | 2d   | 18 |
| FBgn0036927 | 558.71  | 58 | 2 | TLGALSTTHSK                      | 2d   | 18 |
| FBgn0036927 | 742.38  | 44 | 1 | TLINRPALGVFPGK                   | 2d   | 18 |
| FBgn0036927 | 633.64  | 70 | 1 | IFNTWMGDPGK                      | 22d  | 18 |
| FBgn0036927 | 1020.66 | 78 | 1 | LDVPSFDWPIASFPEYR                | 22d  | 18 |
| FBgn0036927 | 1148.33 | 54 | 3 | LQLGGYFHNDDFIPNEPYR              | 22d  | 18 |
| FBgn0036927 | 1380.19 | 59 | 1 | NPVAGIVVEPIQSEGGDNEASPEFFR       | 22d  | 18 |
| FBgn0036927 | 544.06  | 41 | 2 | GNAPLTEQEK                       | 42d  | 18 |
| FBgn0036927 | 633.76  | 77 | 2 | IFNTWMGDPGK                      | 42d  | 18 |
| FBgn0036927 | 1020.57 | 59 | 2 | LDVPSFDWPIASFPEYR                | 42d  | 18 |

|             |         |    |   |                            |      |    |
|-------------|---------|----|---|----------------------------|------|----|
| FBgn0036927 | 1148.43 | 60 | 3 | LQLGGYFHNDFFIPNEPYR        | 42d  | 18 |
| FBgn0036927 | 742.55  | 44 | 3 | TLINRPALGVFPGK             | 42d  | 18 |
| FBgn0036927 | 1020.27 | 73 | 3 | LDVPSFDWPIASFPEYR          | 62d  | 18 |
| FBgn0036927 | 1148.45 | 50 | 1 | LQLGGYFHNDFFIPNEPYR        | 62d  | 18 |
| FBgn0036927 | 1380.18 | 66 | 2 | NPVAGIVVEPIQSEGGDNEASPEFFR | 62d  | 18 |
| FBgn0036927 | 742.34  | 40 | 2 | TLINRPALGVFPGK             | 62d  | 18 |
| FBgn0036927 | 1020.39 | 48 | 1 | LDVPSFDWPIASFPEYR          | 82d  | 18 |
| FBgn0036927 | 1148.7  | 55 | 3 | LQLGGYFHNDFFIPNEPYR        | 82d  | 18 |
| FBgn0036927 | 1380.25 | 65 | 2 | NPVAGIVVEPIQSEGGDNEASPEFFR | 82d  | 18 |
| FBgn0036927 | 1020.43 | 65 | 1 | LDVPSFDWPIASFPEYR          | 102d | 18 |
| FBgn0036927 | 1148.72 | 60 | 1 | LQLGGYFHNDFFIPNEPYR        | 102d | 18 |
| FBgn0036927 | 1380.02 | 37 | 1 | NPVAGIVVEPIQSEGGDNEASPEFFR | 102d | 18 |
| FBgn0036927 | 633.78  | 73 | 1 | IFNTWMGDGPGK               | 112d | 18 |
| FBgn0036927 | 1020.73 | 78 | 4 | LDVPSFDWPIASFPEYR          | 112d | 18 |
| FBgn0036927 | 1148.77 | 49 | 1 | LQLGGYFHNDFFIPNEPYR        | 112d | 18 |
| FBgn0036927 | 1380.33 | 55 | 1 | NPVAGIVVEPIQSEGGDNEASPEFFR | 112d | 18 |
| FBgn0036927 | 742.52  | 45 | 2 | TLINRPALGVFPGK             | 112d | 18 |
| FBgn0036927 | 543.86  | 39 | 1 | GNAPLTEQEK                 | 122d | 18 |
| FBgn0036927 | 1148.65 | 49 | 2 | LQLGGYFHNDFFIPNEPYR        | 122d | 18 |
| FBgn0036927 | 600.36  | 37 | 1 | SIFIWYQNK                  | 122d | 18 |
| FBgn0036927 | 742.38  | 37 | 1 | TLINRPALGVFPGK             | 122d | 18 |
| FBgn0036927 | 544.16  | 36 | 1 | GNAPLTEQEK                 | 132d | 18 |
| FBgn0036927 | 633.99  | 62 | 1 | IFNTWMGDGPGK               | 132d | 18 |
| FBgn0036927 | 1148.43 | 60 | 2 | LQLGGYFHNDFFIPNEPYR        | 132d | 18 |
| FBgn0036927 | 916.15  | 47 | 1 | NGIALLIDEVQTGGGSTGK        | 132d | 18 |
| FBgn0036927 | 742.39  | 39 | 2 | TLINRPALGVFPGK             | 132d | 18 |
| FBgn0036927 | 633.86  | 86 | 3 | IFNTWMGDGPGK               | 142d | 18 |
| FBgn0036927 | 1020.35 | 51 | 2 | LDVPSFDWPIASFPEYR          | 142d | 18 |
| FBgn0036927 | 1148.51 | 39 | 1 | LQLGGYFHNDFFIPNEPYR        | 142d | 18 |
| FBgn0036927 | 558.66  | 36 | 1 | TLGALSTTHSK                | 142d | 18 |
| FBgn0036927 | 742.62  | 59 | 1 | TLINRPALGVFPGK             | 142d | 18 |
| FBgn0036927 | 521.78  | 51 | 1 | VLLLEEVVK                  | 142d | 18 |



|             |         |    |   |                            |     |    |
|-------------|---------|----|---|----------------------------|-----|----|
| FBgn0036927 | 1020.44 | 74 | 3 | LDVPSFDWPIASFPEYR          | 2d  | 28 |
| FBgn0036927 | 1148.68 | 63 | 3 | LQLGGYFHNDDFIPNEPYR        | 2d  | 28 |
| FBgn0036927 | 437.97  | 49 | 1 | NGLLSLEK                   | 2d  | 28 |
| FBgn0036927 | 1380.21 | 63 | 2 | NPVAGIVVEPIQSEGGDNEASPEFFR | 2d  | 28 |
| FBgn0036927 | 742.35  | 38 | 3 | TLINRPALGVFPGK             | 2d  | 28 |
| FBgn0036927 | 521.64  | 46 | 1 | VLLLEEVVK                  | 2d  | 28 |
| FBgn0036927 | 1020.21 | 78 | 2 | LDVPSFDWPIASFPEYR          | 12d | 28 |
| FBgn0036927 | 1148.51 | 60 | 1 | LQLGGYFHNDDFIPNEPYR        | 12d | 28 |
| FBgn0036927 | 1380.29 | 66 | 2 | NPVAGIVVEPIQSEGGDNEASPEFFR | 12d | 28 |
| FBgn0036927 | 742.44  | 40 | 1 | TLINRPALGVFPGK             | 12d | 28 |
| FBgn0036927 | 1020.44 | 38 | 1 | LDVPSFDWPIASFPEYR          | 22d | 28 |
| FBgn0036927 | 1148.55 | 46 | 2 | LQLGGYFHNDDFIPNEPYR        | 22d | 28 |
| FBgn0036927 | 1380.13 | 58 | 2 | NPVAGIVVEPIQSEGGDNEASPEFFR | 22d | 28 |
| FBgn0036927 | 633.91  | 58 | 3 | IFNTWMGDPGK                | 32d | 28 |
| FBgn0036927 | 1020.32 | 74 | 3 | LDVPSFDWPIASFPEYR          | 32d | 28 |
| FBgn0036927 | 1148.61 | 42 | 2 | LQLGGYFHNDDFIPNEPYR        | 32d | 28 |
| FBgn0036927 | 1380.07 | 62 | 3 | NPVAGIVVEPIQSEGGDNEASPEFFR | 32d | 28 |
| FBgn0036927 | 742.35  | 46 | 1 | TLINRPALGVFPGK             | 32d | 28 |
| FBgn0036927 | 1020.52 | 77 | 3 | LDVPSFDWPIASFPEYR          | 36d | 28 |
| FBgn0036927 | 1148.46 | 56 | 3 | LQLGGYFHNDDFIPNEPYR        | 36d | 28 |
| FBgn0036927 | 1380.06 | 71 | 3 | NPVAGIVVEPIQSEGGDNEASPEFFR | 36d | 28 |
| FBgn0036927 | 742.51  | 52 | 3 | TLINRPALGVFPGK             | 36d | 28 |
| FBgn0036927 | 633.74  | 67 | 1 | IFNTWMGDPGK                | 42d | 28 |
| FBgn0036927 | 1020.58 | 62 | 3 | LDVPSFDWPIASFPEYR          | 42d | 28 |
| FBgn0036927 | 1148.71 | 48 | 3 | LQLGGYFHNDDFIPNEPYR        | 42d | 28 |
| FBgn0036927 | 1380.08 | 74 | 1 | NPVAGIVVEPIQSEGGDNEASPEFFR | 42d | 28 |
| FBgn0036927 | 742.38  | 35 | 1 | TLINRPALGVFPGK             | 42d | 28 |
| FBgn0036927 | 633.98  | 78 | 3 | IFNTWMGDPGK                | 46d | 28 |
| FBgn0036927 | 1020.36 | 73 | 1 | LDVPSFDWPIASFPEYR          | 46d | 28 |
| FBgn0036927 | 1148.38 | 40 | 3 | LQLGGYFHNDDFIPNEPYR        | 46d | 28 |
| FBgn0036927 | 1380.03 | 65 | 2 | NPVAGIVVEPIQSEGGDNEASPEFFR | 46d | 28 |
| FBgn0036927 | 521.79  | 34 | 1 | VLLLEEVVK                  | 46d | 28 |

|             |         |    |   |                            |      |    |
|-------------|---------|----|---|----------------------------|------|----|
| FBgn0036927 | 1020.47 | 73 | 3 | LDVPSFDWPIASFPEYR          | 50d  | 28 |
| FBgn0036927 | 1148.53 | 72 | 2 | LQLGGYFHNDFFIPNEPYR        | 50d  | 28 |
| FBgn0036927 | 1380.07 | 81 | 3 | NPVAGIVVEPIQSEGGDNEASPEFFR | 50d  | 28 |
| FBgn0036927 | 742.62  | 45 | 2 | TLINRPALGVFPGK             | 50d  | 28 |
| FBgn0036927 | 650.8   | 67 | 1 | YPLDENVAHNK                | 50d  | 28 |
| FBgn0036927 | 633.93  | 42 | 1 | IFNTWMGDPGK                | 52d  | 28 |
| FBgn0036927 | 1020.6  | 60 | 3 | LDVPSFDWPIASFPEYR          | 52d  | 28 |
| FBgn0036927 | 1148.23 | 54 | 3 | LQLGGYFHNDFFIPNEPYR        | 52d  | 28 |
| FBgn0036927 | 1380.2  | 65 | 1 | NPVAGIVVEPIQSEGGDNEASPEFFR | 52d  | 28 |
| FBgn0036927 | 742.67  | 46 | 2 | TLINRPALGVFPGK             | 52d  | 28 |
| FBgn0036927 | 808.89  | 41 | 1 | KLQLGGYFHNDFFIPNEPYR       | 56d  | 28 |
| FBgn0036927 | 1020.74 | 75 | 3 | LDVPSFDWPIASFPEYR          | 56d  | 28 |
| FBgn0036927 | 1148.52 | 53 | 2 | LQLGGYFHNDFFIPNEPYR        | 56d  | 28 |
| FBgn0036927 | 916.01  | 54 | 2 | NGIALLIDEVQTGGGSTGK        | 56d  | 28 |
| FBgn0036927 | 742.55  | 44 | 2 | TLINRPALGVFPGK             | 56d  | 28 |
| FBgn0036927 | 521.98  | 51 | 2 | VLLLEEYVK                  | 56d  | 28 |
| FBgn0036930 | 388.75  | 34 | 1 | MEIKTR                     | 50d  | 28 |
| FBgn0036964 | 680.25  | 37 | 1 | ELEQAKAQGSLHETLLDR         | 142d | 18 |
| FBgn0036968 | 863.95  | 34 | 1 | ATGLLLFAGQVRNPKAA          | 50d  | 28 |
| FBgn0036987 | 444.12  | 37 | 1 | TPKDG DVR                  | 142d | 18 |
| FBgn0037001 | 785.5   | 50 | 2 | FIHLSSLNVEANPK             | 2d   | 18 |
| FBgn0037001 | 894.57  | 45 | 1 | QPVYVSDVAQAIINA AK         | 2d   | 18 |
| FBgn0037001 | 785.53  | 61 | 3 | FIHLSSLNVEANPK             | 22d  | 18 |
| FBgn0037001 | 894.7   | 72 | 1 | QPVYVSDVAQAIINA AK         | 42d  | 18 |
| FBgn0037001 | 797.41  | 74 | 2 | YQLSELVDWFHR               | 42d  | 18 |
| FBgn0037001 | 797.01  | 71 | 2 | YQLSELVDWFHR               | 62d  | 18 |
| FBgn0037001 | 894.66  | 56 | 1 | QPVYVSDVAQAIINA AK         | 122d | 18 |
| FBgn0037001 | 797.18  | 51 | 1 | YQLSELVDWFHR               | 2d   | 28 |
| FBgn0037001 | 531.96  | 61 | 3 | YQLSELVDWFHR               | 12d  | 28 |
| FBgn0037001 | 894.54  | 38 | 1 | QPVYVSDVAQAIINA AK         | 32d  | 28 |
| FBgn0037001 | 894.52  | 40 | 1 | QPVYVSDVAQAIINA AK         | 36d  | 28 |
| FBgn0037001 | 894.72  | 46 | 1 | QPVYVSDVAQAIINA AK         | 42d  | 28 |

|             |         |     |   |                                              |      |    |
|-------------|---------|-----|---|----------------------------------------------|------|----|
| FBgn0037001 | 894.58  | 41  | 1 | QPVYVSDVAQAIINAAK                            | 46d  | 28 |
| FBgn0037011 | 1037.62 | 43  | 1 | VGILAGTTTSLDELDPDSTTAEVLTHIVEK               | 50d  | 28 |
| FBgn0037024 | 804.98  | 48  | 1 | EAAVVDPEPELVIK                               | 42d  | 18 |
| FBgn0037057 | 997.51  | 77  | 1 | GMADVDAAGGIQYLENQLK                          | 36d  | 28 |
| FBgn0037057 | 997.62  | 78  | 1 | GMADVDAAGGIQYLENQLK                          | 42d  | 28 |
| FBgn0037063 | 872.95  | 57  | 2 | VTELGLVYNPILEQR                              | 42d  | 18 |
| FBgn0037063 | 720.29  | 77  | 1 | FIGEEESSGAEGVK                               | 82d  | 18 |
| FBgn0037063 | 1310.12 | 57  | 1 | SNDIDLVTQTDKDVEQLLMDGIR                      | 112d | 18 |
| FBgn0037063 | 1309.98 | 67  | 2 | SNDIDLVTQTDKDVEQLLMDGIR                      | 132d | 18 |
| FBgn0037063 | 720.57  | 65  | 1 | FIGEEESSGAEGVK                               | 142d | 18 |
| FBgn0037063 | 720.28  | 64  | 2 | FIGEEESSGAEGVK                               | 2d   | 28 |
| FBgn0037063 | 720.49  | 56  | 1 | FIGEEESSGAEGVK                               | 12d  | 28 |
| FBgn0037063 | 849.51  | 48  | 1 | RVLAAATPELAQEISK                             | 12d  | 28 |
| FBgn0037063 | 873.07  | 47  | 1 | VTELGLVYNPILEQR                              | 56d  | 28 |
| FBgn0037066 | 1270.77 | 53  | 1 | MVVPGGGGGGASAGGASAVGGVAQQQAVNDAESGGVGIGGLATR | 2d   | 28 |
| FBgn0037066 | 1270.74 | 40  | 1 | MVVPGGGGGGASAGGASAVGGVAQQQAVNDAESGGVGIGGLATR | 36d  | 28 |
| FBgn0037069 | 654.33  | 37  | 2 | ALEYIAAHPPQP                                 | 2d   | 18 |
| FBgn0037069 | 654.41  | 48  | 3 | ALEYIAAHPPQP                                 | 2d   | 28 |
| FBgn0037069 | 654.39  | 43  | 1 | ALEYIAAHPPQP                                 | 46d  | 28 |
| FBgn0037069 | 654.36  | 36  | 1 | ALEYIAAHPPQP                                 | 50d  | 28 |
| FBgn0037072 | 659.45  | 55  | 2 | LQIWDTAGQER                                  | 2d   | 18 |
| FBgn0037138 | 1447.88 | 57  | 2 | EAGVPDGVVNFVPADGPVFGDTITASPHLAGINFTGSVPTFNR  | 2d   | 18 |
| FBgn0037138 | 890.68  | 101 | 3 | KSPNLEILAGGTYSDSK                            | 2d   | 18 |
| FBgn0037138 | 916.61  | 75  | 3 | LKDFPIANEPILGYLK                             | 2d   | 18 |
| FBgn0037138 | 746.55  | 35  | 1 | MYVPESLWPQIK                                 | 2d   | 18 |
| FBgn0037138 | 795.61  | 43  | 1 | DFPIANEPILGYLK                               | 22d  | 18 |
| FBgn0037138 | 873.05  | 63  | 3 | FALTGAVFGQDEDFVK                             | 22d  | 18 |
| FBgn0037138 | 669.85  | 69  | 3 | GYFVNPTIVLSK                                 | 22d  | 18 |
| FBgn0037138 | 890.89  | 65  | 1 | KSPNLEILAGGTYSDSK                            | 22d  | 18 |
| FBgn0037138 | 611.44  | 51  | 2 | LKDFPIANEPILGYLK                             | 22d  | 18 |
| FBgn0037138 | 746.4   | 57  | 3 | MYVPESLWPQIK                                 | 22d  | 18 |
| FBgn0037138 | 826.07  | 66  | 2 | QVGNNIDNYVNFPR                               | 22d  | 18 |

|             |         |     |   |                     |      |    |
|-------------|---------|-----|---|---------------------|------|----|
| FBgn0037138 | 795.94  | 65  | 2 | DFPIANEPILGYLK      | 42d  | 18 |
| FBgn0037138 | 873.06  | 75  | 2 | FALTGAVFGQDEDFVK    | 42d  | 18 |
| FBgn0037138 | 973.09  | 111 | 2 | IGDVQDFSSFTSAVIDDK  | 42d  | 18 |
| FBgn0037138 | 916.48  | 79  | 3 | LKDFPIANEPILGYLK    | 42d  | 18 |
| FBgn0037138 | 622.55  | 45  | 1 | MAAGNFYINDK         | 42d  | 18 |
| FBgn0037138 | 746.46  | 45  | 2 | MYVPESLWPQIK        | 42d  | 18 |
| FBgn0037138 | 826.09  | 62  | 3 | QVGNNIDNYVNFPR      | 42d  | 18 |
| FBgn0037138 | 988.92  | 82  | 8 | TAIQAEIDSAAELIDFIR  | 42d  | 18 |
| FBgn0037138 | 437.61  | 43  | 3 | TAVETQPK            | 42d  | 18 |
| FBgn0037138 | 796.02  | 78  | 3 | DFPIANEPILGYLK      | 62d  | 18 |
| FBgn0037138 | 873.18  | 69  | 3 | FALTGAVFGQDEDFVK    | 62d  | 18 |
| FBgn0037138 | 669.94  | 66  | 2 | GYFVNPTIVLSK        | 62d  | 18 |
| FBgn0037138 | 516.75  | 36  | 2 | ITGYIEHAK           | 62d  | 18 |
| FBgn0037138 | 890.76  | 84  | 1 | KSPNLEILAGGTYSISK   | 62d  | 18 |
| FBgn0037138 | 989.08  | 96  | 4 | TAIQAEIDSAAELIDFIR  | 62d  | 18 |
| FBgn0037138 | 795.34  | 62  | 2 | DFPIANEPILGYLK      | 82d  | 18 |
| FBgn0037138 | 873.18  | 78  | 1 | FALTGAVFGQDEDFVK    | 82d  | 18 |
| FBgn0037138 | 670.05  | 45  | 1 | GYFVNPTIVLSK        | 82d  | 18 |
| FBgn0037138 | 891.19  | 91  | 1 | KSPNLEILAGGTYSISK   | 82d  | 18 |
| FBgn0037138 | 916.75  | 51  | 1 | LKDFPIANEPILGYLK    | 82d  | 18 |
| FBgn0037138 | 746.21  | 38  | 1 | MYVPESLWPQIK        | 82d  | 18 |
| FBgn0037138 | 717.86  | 56  | 1 | STGSVVGQQPFGGGR     | 82d  | 18 |
| FBgn0037138 | 988.19  | 86  | 6 | TAIQAEIDSAAELIDFIR  | 82d  | 18 |
| FBgn0037138 | 437.82  | 37  | 1 | TAVETQPK            | 82d  | 18 |
| FBgn0037138 | 795.7   | 67  | 1 | DFPIANEPILGYLK      | 102d | 18 |
| FBgn0037138 | 872.58  | 47  | 2 | FALTGAVFGQDEDFVK    | 102d | 18 |
| FBgn0037138 | 669.81  | 48  | 1 | GYFVNPTIVLSK        | 102d | 18 |
| FBgn0037138 | 973.07  | 91  | 1 | IGDVQDFSSFTSAVIDDK  | 102d | 18 |
| FBgn0037138 | 891.16  | 72  | 2 | KSPNLEILAGGTYSISK   | 102d | 18 |
| FBgn0037138 | 611.16  | 50  | 2 | LKDFPIANEPILGYLK    | 102d | 18 |
| FBgn0037138 | 1116.18 | 62  | 2 | NFHFIHASADVSVVTSTIR | 102d | 18 |
| FBgn0037138 | 825.69  | 76  | 2 | QVGNNIDNYVNFPR      | 102d | 18 |

|             |         |    |   |                     |      |    |
|-------------|---------|----|---|---------------------|------|----|
| FBgn0037138 | 989.17  | 64 | 2 | TAIQAEIDSAAELIDFIR  | 102d | 18 |
| FBgn0037138 | 437.63  | 43 | 1 | TAVETQPK            | 102d | 18 |
| FBgn0037138 | 795.76  | 74 | 2 | DFPIANEPILGYLK      | 112d | 18 |
| FBgn0037138 | 872.85  | 41 | 1 | FALTGAVFGQDEDFVK    | 112d | 18 |
| FBgn0037138 | 802.92  | 62 | 1 | GTASSCEDIPVIGGK     | 112d | 18 |
| FBgn0037138 | 670.06  | 65 | 2 | GYFVNPTIVLSK        | 112d | 18 |
| FBgn0037138 | 916.66  | 74 | 2 | LKDFPIANEPILGYLK    | 112d | 18 |
| FBgn0037138 | 746.49  | 38 | 1 | MYVPESLWPQIK        | 112d | 18 |
| FBgn0037138 | 1116.12 | 80 | 1 | NFHFIHASADVSVVTSTIR | 112d | 18 |
| FBgn0037138 | 826.13  | 42 | 1 | QVGNNIDNYVNFPR      | 112d | 18 |
| FBgn0037138 | 659.58  | 56 | 1 | TAIQAEIDSAAELIDFIR  | 112d | 18 |
| FBgn0037138 | 437.65  | 44 | 2 | TAVETQPK            | 112d | 18 |
| FBgn0037138 | 795.7   | 61 | 1 | DFPIANEPILGYLK      | 122d | 18 |
| FBgn0037138 | 611.23  | 45 | 1 | LKDFPIANEPILGYLK    | 122d | 18 |
| FBgn0037138 | 622.6   | 66 | 1 | MAAGNFYINDK         | 122d | 18 |
| FBgn0037138 | 825.9   | 66 | 4 | QVGNNIDNYVNFPR      | 122d | 18 |
| FBgn0037138 | 989.05  | 83 | 1 | TAIQAEIDSAAELIDFIR  | 122d | 18 |
| FBgn0037138 | 795.93  | 56 | 1 | DFPIANEPILGYLK      | 132d | 18 |
| FBgn0037138 | 873.03  | 58 | 1 | FALTGAVFGQDEDFVK    | 132d | 18 |
| FBgn0037138 | 669.92  | 65 | 2 | GYFVNPTIVLSK        | 132d | 18 |
| FBgn0037138 | 890.99  | 90 | 2 | KSPNLEILAGGTYSISK   | 132d | 18 |
| FBgn0037138 | 916.37  | 65 | 2 | LKDFPIANEPILGYLK    | 132d | 18 |
| FBgn0037138 | 746.33  | 49 | 1 | MYVPESLWPQIK        | 132d | 18 |
| FBgn0037138 | 825.9   | 60 | 2 | QVGNNIDNYVNFPR      | 132d | 18 |
| FBgn0037138 | 872.77  | 48 | 1 | FALTGAVFGQDEDFVK    | 142d | 18 |
| FBgn0037138 | 916.77  | 65 | 2 | LKDFPIANEPILGYLK    | 142d | 18 |
| FBgn0037138 | 825.77  | 61 | 2 | QVGNNIDNYVNFPR      | 142d | 18 |
| FBgn0037138 | 795.65  | 53 | 1 | DFPIANEPILGYLK      | 2d   | 28 |
| FBgn0037138 | 873.01  | 35 | 1 | FALTGAVFGQDEDFVK    | 2d   | 28 |
| FBgn0037138 | 669.73  | 66 | 2 | GYFVNPTIVLSK        | 2d   | 28 |
| FBgn0037138 | 890.87  | 81 | 2 | KSPNLEILAGGTYSISK   | 2d   | 28 |
| FBgn0037138 | 916.4   | 67 | 3 | LKDFPIANEPILGYLK    | 2d   | 28 |

|             |        |     |   |                    |     |    |
|-------------|--------|-----|---|--------------------|-----|----|
| FBgn0037138 | 825.74 | 65  | 2 | QVGNNIDNYVNFPR     | 2d  | 28 |
| FBgn0037138 | 989.06 | 88  | 1 | TAIQAEIDSAAELIDFIR | 2d  | 28 |
| FBgn0037138 | 437.52 | 41  | 1 | TAVETQPK           | 2d  | 28 |
| FBgn0037138 | 795.98 | 56  | 2 | DFPIANEPILGYLK     | 12d | 28 |
| FBgn0037138 | 873.11 | 37  | 1 | FALTGAVFGQDEDFVK   | 12d | 28 |
| FBgn0037138 | 669.69 | 53  | 2 | GYFVNPTIVLSK       | 12d | 28 |
| FBgn0037138 | 890.66 | 84  | 3 | KSPNLEILAGGTYSDSK  | 12d | 28 |
| FBgn0037138 | 916.58 | 66  | 2 | LKDFPIANEPILGYLK   | 12d | 28 |
| FBgn0037138 | 622.69 | 44  | 2 | MAAGNFYINDK        | 12d | 28 |
| FBgn0037138 | 746.29 | 34  | 1 | MYVPESLWPQIK       | 12d | 28 |
| FBgn0037138 | 826.01 | 50  | 1 | QVGNNIDNYVNFPR     | 12d | 28 |
| FBgn0037138 | 989.19 | 37  | 1 | TAIQAEIDSAAELIDFIR | 12d | 28 |
| FBgn0037138 | 873.15 | 65  | 1 | FALTGAVFGQDEDFVK   | 22d | 28 |
| FBgn0037138 | 670.04 | 73  | 2 | GYFVNPTIVLSK       | 22d | 28 |
| FBgn0037138 | 916.58 | 57  | 1 | LKDFPIANEPILGYLK   | 22d | 28 |
| FBgn0037138 | 825.72 | 50  | 2 | QVGNNIDNYVNFPR     | 22d | 28 |
| FBgn0037138 | 796.06 | 82  | 3 | DFPIANEPILGYLK     | 32d | 28 |
| FBgn0037138 | 873.06 | 69  | 3 | FALTGAVFGQDEDFVK   | 32d | 28 |
| FBgn0037138 | 803.07 | 73  | 1 | GTASSCEDIPIVIGGK   | 32d | 28 |
| FBgn0037138 | 670.09 | 56  | 2 | GYFVNPTIVLSK       | 32d | 28 |
| FBgn0037138 | 972.83 | 91  | 2 | IGDVQDFSSFTSAVIDDK | 32d | 28 |
| FBgn0037138 | 890.91 | 77  | 2 | KSPNLEILAGGTYSDSK  | 32d | 28 |
| FBgn0037138 | 916.6  | 77  | 3 | LKDFPIANEPILGYLK   | 32d | 28 |
| FBgn0037138 | 622.69 | 57  | 2 | MAAGNFYINDK        | 32d | 28 |
| FBgn0037138 | 746.34 | 57  | 2 | MYVPESLWPQIK       | 32d | 28 |
| FBgn0037138 | 825.87 | 54  | 1 | QVGNNIDNYVNFPR     | 32d | 28 |
| FBgn0037138 | 717.82 | 36  | 2 | STGSVVGQQPFGGGR    | 32d | 28 |
| FBgn0037138 | 989.23 | 41  | 1 | TAIQAEIDSAAELIDFIR | 32d | 28 |
| FBgn0037138 | 795.78 | 61  | 2 | DFPIANEPILGYLK     | 36d | 28 |
| FBgn0037138 | 873.14 | 66  | 3 | FALTGAVFGQDEDFVK   | 36d | 28 |
| FBgn0037138 | 972.75 | 109 | 3 | IGDVQDFSSFTSAVIDDK | 36d | 28 |
| FBgn0037138 | 516.56 | 53  | 1 | ITGYIEHAK          | 36d | 28 |

|             |         |     |   |                     |     |    |
|-------------|---------|-----|---|---------------------|-----|----|
| FBgn0037138 | 890.81  | 105 | 3 | KSPNLEILAGGTYSDSK   | 36d | 28 |
| FBgn0037138 | 916.62  | 58  | 3 | LKDFPIANEPILGYLK    | 36d | 28 |
| FBgn0037138 | 622.61  | 36  | 1 | MAAGNFYINDK         | 36d | 28 |
| FBgn0037138 | 746.42  | 49  | 4 | MYVPESLWPQIK        | 36d | 28 |
| FBgn0037138 | 744.52  | 71  | 3 | NFHFIHASADVSVVTSTIR | 36d | 28 |
| FBgn0037138 | 689.12  | 61  | 1 | QDLNAATMLGQSK       | 36d | 28 |
| FBgn0037138 | 826.12  | 54  | 2 | QVGNNIDNYVNFPR      | 36d | 28 |
| FBgn0037138 | 717.99  | 39  | 2 | STGSVVGQQPFGGGR     | 36d | 28 |
| FBgn0037138 | 796.01  | 64  | 2 | DFPIANEPILGYLK      | 42d | 28 |
| FBgn0037138 | 872.97  | 73  | 1 | FALTGAVFGQDEDFVK    | 42d | 28 |
| FBgn0037138 | 669.51  | 71  | 3 | GYFVNPTIVLSK        | 42d | 28 |
| FBgn0037138 | 972.87  | 69  | 1 | IGDVQDFSSFTSAVIDDK  | 42d | 28 |
| FBgn0037138 | 516.8   | 38  | 1 | ITGYIEHAK           | 42d | 28 |
| FBgn0037138 | 890.89  | 72  | 2 | KSPNLEILAGGTYSDSK   | 42d | 28 |
| FBgn0037138 | 916.64  | 75  | 2 | LKDFPIANEPILGYLK    | 42d | 28 |
| FBgn0037138 | 622.97  | 65  | 1 | MAAGNFYINDK         | 42d | 28 |
| FBgn0037138 | 746.58  | 53  | 2 | MYVPESLWPQIK        | 42d | 28 |
| FBgn0037138 | 1115.97 | 60  | 1 | NFHFIHASADVSVVTSTIR | 42d | 28 |
| FBgn0037138 | 689.22  | 57  | 1 | QDLNAATMLGQSK       | 42d | 28 |
| FBgn0037138 | 825.75  | 50  | 1 | QVGNNIDNYVNFPR      | 42d | 28 |
| FBgn0037138 | 437.67  | 43  | 1 | TAVETQPK            | 42d | 28 |
| FBgn0037138 | 795.85  | 63  | 3 | DFPIANEPILGYLK      | 46d | 28 |
| FBgn0037138 | 872.96  | 56  | 2 | FALTGAVFGQDEDFVK    | 46d | 28 |
| FBgn0037138 | 670.03  | 65  | 3 | GYFVNPTIVLSK        | 46d | 28 |
| FBgn0037138 | 972.73  | 77  | 1 | IGDVQDFSSFTSAVIDDK  | 46d | 28 |
| FBgn0037138 | 516.89  | 41  | 1 | ITGYIEHAK           | 46d | 28 |
| FBgn0037138 | 890.83  | 93  | 3 | KSPNLEILAGGTYSDSK   | 46d | 28 |
| FBgn0037138 | 916.7   | 68  | 2 | LKDFPIANEPILGYLK    | 46d | 28 |
| FBgn0037138 | 622.81  | 57  | 2 | MAAGNFYINDK         | 46d | 28 |
| FBgn0037138 | 746.59  | 47  | 2 | MYVPESLWPQIK        | 46d | 28 |
| FBgn0037138 | 744.46  | 60  | 1 | NFHFIHASADVSVVTSTIR | 46d | 28 |
| FBgn0037138 | 825.85  | 51  | 2 | QVGNNIDNYVNFPR      | 46d | 28 |

|             |         |     |   |                    |     |    |
|-------------|---------|-----|---|--------------------|-----|----|
| FBgn0037138 | 717.91  | 36  | 2 | STGSVVGQQPFGGGR    | 46d | 28 |
| FBgn0037138 | 659.67  | 52  | 2 | TAIQAEIDSAAELIDFIR | 46d | 28 |
| FBgn0037138 | 796.04  | 64  | 1 | DFPIANEPILGYLK     | 50d | 28 |
| FBgn0037138 | 872.83  | 69  | 2 | FALTGAVFGQDEDFVK   | 50d | 28 |
| FBgn0037138 | 802.95  | 46  | 1 | GTASSCEDIPIVIGGK   | 50d | 28 |
| FBgn0037138 | 669.91  | 73  | 5 | GYFVNPTIVLSK       | 50d | 28 |
| FBgn0037138 | 890.66  | 109 | 3 | KSPNLEILAGGTYSDSK  | 50d | 28 |
| FBgn0037138 | 916.55  | 80  | 2 | LKDFPIANEPILGYLK   | 50d | 28 |
| FBgn0037138 | 746.59  | 49  | 3 | MYVPESLWPQIK       | 50d | 28 |
| FBgn0037138 | 825.95  | 51  | 1 | QVGNNIDNYVNFPR     | 50d | 28 |
| FBgn0037138 | 717.77  | 36  | 1 | STGSVVGQQPFGGGR    | 50d | 28 |
| FBgn0037138 | 989.03  | 36  | 1 | TAIQAEIDSAAELIDFIR | 50d | 28 |
| FBgn0037138 | 437.68  | 44  | 1 | TAVETQPK           | 50d | 28 |
| FBgn0037138 | 795.8   | 71  | 2 | DFPIANEPILGYLK     | 52d | 28 |
| FBgn0037138 | 872.97  | 61  | 1 | FALTGAVFGQDEDFVK   | 52d | 28 |
| FBgn0037138 | 802.81  | 52  | 1 | GTASSCEDIPIVIGGK   | 52d | 28 |
| FBgn0037138 | 669.86  | 69  | 6 | GYFVNPTIVLSK       | 52d | 28 |
| FBgn0037138 | 972.65  | 36  | 1 | IGDVQDFSSFTSAVIDDK | 52d | 28 |
| FBgn0037138 | 890.92  | 89  | 3 | KSPNLEILAGGTYSDSK  | 52d | 28 |
| FBgn0037138 | 916.77  | 80  | 1 | LKDFPIANEPILGYLK   | 52d | 28 |
| FBgn0037138 | 746.5   | 48  | 4 | MYVPESLWPQIK       | 52d | 28 |
| FBgn0037138 | 826.13  | 46  | 1 | QVGNNIDNYVNFPR     | 52d | 28 |
| FBgn0037138 | 795.9   | 65  | 3 | DFPIANEPILGYLK     | 56d | 28 |
| FBgn0037138 | 872.97  | 72  | 2 | FALTGAVFGQDEDFVK   | 56d | 28 |
| FBgn0037138 | 669.67  | 62  | 5 | GYFVNPTIVLSK       | 56d | 28 |
| FBgn0037138 | 972.99  | 109 | 1 | IGDVQDFSSFTSAVIDDK | 56d | 28 |
| FBgn0037138 | 916.66  | 67  | 3 | LKDFPIANEPILGYLK   | 56d | 28 |
| FBgn0037138 | 746.44  | 57  | 2 | MYVPESLWPQIK       | 56d | 28 |
| FBgn0037138 | 989.25  | 87  | 5 | TAIQAEIDSAAELIDFIR | 56d | 28 |
| FBgn0037146 | 906.45  | 107 | 2 | EALATVGAEHAVSLVSTR | 2d  | 18 |
| FBgn0037146 | 1012.32 | 37  | 1 | IAQVLVTKPDFYNEETR  | 2d  | 18 |
| FBgn0037146 | 693.46  | 44  | 1 | LNQQLTFGPPAAK      | 2d  | 18 |



|             |         |    |   |                     |      |    |
|-------------|---------|----|---|---------------------|------|----|
| FBgn0037146 | 715.31  | 46 | 1 | ASAVNTLADLLVSR      | 22d  | 18 |
| FBgn0037146 | 568.11  | 35 | 1 | EFDGATLEPR          | 22d  | 18 |
| FBgn0037146 | 1012.75 | 56 | 3 | IAQVLVTKPDFYNEETR   | 22d  | 18 |
| FBgn0037146 | 906.6   | 80 | 3 | LASIVEQVAECHLEGR    | 22d  | 18 |
| FBgn0037146 | 693.25  | 69 | 3 | LNQQLTFGPPAAK       | 22d  | 18 |
| FBgn0037146 | 715.9   | 82 | 2 | ASAVNTLADLLVSR      | 42d  | 18 |
| FBgn0037146 | 906.6   | 88 | 3 | EALATVGAEHAVSLVSTR  | 42d  | 18 |
| FBgn0037146 | 746.83  | 40 | 2 | EEISDLLSMENHIDIIPR  | 42d  | 18 |
| FBgn0037146 | 1012.69 | 48 | 2 | IAQVLVTKPDFYNEETR   | 42d  | 18 |
| FBgn0037146 | 604.81  | 63 | 3 | LASIVEQVAECHLEGR    | 42d  | 18 |
| FBgn0037146 | 716.05  | 73 | 1 | ASAVNTLADLLVSR      | 62d  | 18 |
| FBgn0037146 | 906.47  | 85 | 4 | EALATVGAEHAVSLVSTR  | 62d  | 18 |
| FBgn0037146 | 568.3   | 34 | 1 | EFDGATLEPR          | 62d  | 18 |
| FBgn0037146 | 1012.61 | 64 | 5 | IAQVLVTKPDFYNEETR   | 62d  | 18 |
| FBgn0037146 | 906.3   | 80 | 2 | LASIVEQVAECHLEGR    | 62d  | 18 |
| FBgn0037146 | 693.18  | 68 | 2 | LNQQLTFGPPAAK       | 62d  | 18 |
| FBgn0037146 | 1000.95 | 74 | 2 | WILEGQDHAAADFAEGGGR | 62d  | 18 |
| FBgn0037146 | 715.94  | 85 | 3 | ASAVNTLADLLVSR      | 82d  | 18 |
| FBgn0037146 | 586.28  | 67 | 3 | GPVGVEGLLTTK        | 82d  | 18 |
| FBgn0037146 | 1012.7  | 49 | 6 | IAQVLVTKPDFYNEETR   | 82d  | 18 |
| FBgn0037146 | 906.38  | 98 | 2 | LASIVEQVAECHLEGR    | 82d  | 18 |
| FBgn0037146 | 693.53  | 54 | 1 | LNQQLTFGPPAAK       | 82d  | 18 |
| FBgn0037146 | 715.89  | 75 | 3 | ASAVNTLADLLVSR      | 102d | 18 |
| FBgn0037146 | 906.41  | 65 | 1 | EALATVGAEHAVSLVSTR  | 102d | 18 |
| FBgn0037146 | 586.33  | 58 | 1 | GPVGVEGLLTTK        | 102d | 18 |
| FBgn0037146 | 1012.74 | 48 | 1 | IAQVLVTKPDFYNEETR   | 102d | 18 |
| FBgn0037146 | 905.76  | 59 | 2 | LASIVEQVAECHLEGR    | 102d | 18 |
| FBgn0037146 | 693.51  | 60 | 1 | LNQQLTFGPPAAK       | 102d | 18 |
| FBgn0037146 | 715.63  | 78 | 1 | ASAVNTLADLLVSR      | 112d | 18 |
| FBgn0037146 | 906.54  | 66 | 1 | EALATVGAEHAVSLVSTR  | 112d | 18 |
| FBgn0037146 | 585.91  | 54 | 1 | GPVGVEGLLTTK        | 112d | 18 |
| FBgn0037146 | 1012.75 | 53 | 1 | IAQVLVTKPDFYNEETR   | 112d | 18 |

|             |         |     |   |                          |      |    |
|-------------|---------|-----|---|--------------------------|------|----|
| FBgn0037146 | 906.36  | 78  | 3 | LASIVEQVAECHLEGR         | 112d | 18 |
| FBgn0037146 | 1000.9  | 84  | 2 | WILEGQDHAAADFAEGGGR      | 112d | 18 |
| FBgn0037146 | 715.43  | 82  | 1 | ASAVNTLADLLVSR           | 122d | 18 |
| FBgn0037146 | 585.81  | 62  | 1 | GPVGVEGLLTTK             | 122d | 18 |
| FBgn0037146 | 1012.53 | 53  | 1 | IAQVLVTKPDFYNEETR        | 122d | 18 |
| FBgn0037146 | 1385.15 | 66  | 1 | KVGTFEATESANAVPVEVMAENAR | 122d | 18 |
| FBgn0037146 | 906.63  | 68  | 2 | LASIVEQVAECHLEGR         | 122d | 18 |
| FBgn0037146 | 693.23  | 60  | 1 | LNQQLTFGPPAAK            | 122d | 18 |
| FBgn0037146 | 1001.11 | 53  | 1 | WILEGQDHAAADFAEGGGR      | 122d | 18 |
| FBgn0037146 | 715.8   | 74  | 2 | ASAVNTLADLLVSR           | 132d | 18 |
| FBgn0037146 | 906.59  | 54  | 1 | EALATVGAEHAVSLVSTR       | 132d | 18 |
| FBgn0037146 | 674.87  | 60  | 2 | IAQVLVTKPDFYNEETR        | 132d | 18 |
| FBgn0037146 | 604.73  | 52  | 2 | LASIVEQVAECHLEGR         | 132d | 18 |
| FBgn0037146 | 693.58  | 69  | 1 | LNQQLTFGPPAAK            | 132d | 18 |
| FBgn0037146 | 613.13  | 34  | 1 | TWLHETLPLD               | 132d | 18 |
| FBgn0037146 | 1321.17 | 73  | 3 | VGTFEATESANAVPVEVMAENAR  | 132d | 18 |
| FBgn0037146 | 716.08  | 71  | 1 | ASAVNTLADLLVSR           | 142d | 18 |
| FBgn0037146 | 906.61  | 75  | 2 | EALATVGAEHAVSLVSTR       | 142d | 18 |
| FBgn0037146 | 674.81  | 58  | 3 | IAQVLVTKPDFYNEETR        | 142d | 18 |
| FBgn0037146 | 604.81  | 51  | 2 | LASIVEQVAECHLEGR         | 142d | 18 |
| FBgn0037146 | 612.41  | 37  | 1 | TWLHETLPLD               | 142d | 18 |
| FBgn0037146 | 715.6   | 95  | 3 | ASAVNTLADLLVSR           | 2d   | 28 |
| FBgn0037146 | 906.5   | 102 | 2 | EALATVGAEHAVSLVSTR       | 2d   | 28 |
| FBgn0037146 | 1012.44 | 56  | 5 | IAQVLVTKPDFYNEETR        | 2d   | 28 |
| FBgn0037146 | 906.47  | 46  | 1 | LASIVEQVAECHLEGR         | 2d   | 28 |
| FBgn0037146 | 693.08  | 65  | 3 | LNQQLTFGPPAAK            | 2d   | 28 |
| FBgn0037146 | 715.3   | 84  | 3 | ASAVNTLADLLVSR           | 12d  | 28 |
| FBgn0037146 | 906.5   | 94  | 6 | EALATVGAEHAVSLVSTR       | 12d  | 28 |
| FBgn0037146 | 568.22  | 45  | 2 | EFDGATLEPR               | 12d  | 28 |
| FBgn0037146 | 586.28  | 52  | 2 | GPVGVEGLLTTK             | 12d  | 28 |
| FBgn0037146 | 1012.65 | 55  | 2 | IAQVLVTKPDFYNEETR        | 12d  | 28 |
| FBgn0037146 | 1385.33 | 69  | 2 | KVGTFEATESANAVPVEVMAENAR | 12d  | 28 |

|             |         |     |   |                           |     |    |
|-------------|---------|-----|---|---------------------------|-----|----|
| FBgn0037146 | 906.35  | 73  | 2 | LASIVEQVAECHLEGR          | 12d | 28 |
| FBgn0037146 | 973.32  | 71  | 1 | LMHTYTSDDNSNIEFGK         | 12d | 28 |
| FBgn0037146 | 693.46  | 66  | 3 | LNQQLTFGPPAAK             | 12d | 28 |
| FBgn0037146 | 613.44  | 36  | 1 | TWLHETLPLD                | 12d | 28 |
| FBgn0037146 | 1320.93 | 82  | 3 | VGTFTEATESANAVPVEVMAENAR  | 12d | 28 |
| FBgn0037146 | 716.05  | 54  | 2 | ASAVNTLADLLVSR            | 22d | 28 |
| FBgn0037146 | 906.39  | 104 | 3 | EALATVGAEHAVSLVSTR        | 22d | 28 |
| FBgn0037146 | 568.51  | 50  | 2 | EFDGATLEPR                | 22d | 28 |
| FBgn0037146 | 675.48  | 60  | 3 | IAQVLVTKPDFYNEETR         | 22d | 28 |
| FBgn0037146 | 906.57  | 58  | 1 | LASIVEQVAECHLEGR          | 22d | 28 |
| FBgn0037146 | 693.41  | 50  | 2 | LNQQLTFGPPAAK             | 22d | 28 |
| FBgn0037146 | 612.83  | 35  | 1 | TWLHETLPLD                | 22d | 28 |
| FBgn0037146 | 1001.03 | 99  | 1 | WILEGQDHAAADFAEGGGR       | 22d | 28 |
| FBgn0037146 | 715.8   | 78  | 3 | ASAVNTLADLLVSR            | 32d | 28 |
| FBgn0037146 | 906.4   | 78  | 3 | EALATVGAEHAVSLVSTR        | 32d | 28 |
| FBgn0037146 | 746.83  | 48  | 1 | EEISDLLSMENHIDLIPR        | 32d | 28 |
| FBgn0037146 | 586.28  | 74  | 3 | GPVGVEGLLTTK              | 32d | 28 |
| FBgn0037146 | 1012.57 | 54  | 3 | IAQVLVTKPDFYNEETR         | 32d | 28 |
| FBgn0037146 | 906.37  | 68  | 3 | LASIVEQVAECHLEGR          | 32d | 28 |
| FBgn0037146 | 693.23  | 60  | 2 | LNQQLTFGPPAAK             | 32d | 28 |
| FBgn0037146 | 613.07  | 39  | 1 | TWLHETLPLD                | 32d | 28 |
| FBgn0037146 | 1320.93 | 48  | 1 | VGTFTEATESANAVPVEVMAENAR  | 32d | 28 |
| FBgn0037146 | 1000.92 | 70  | 1 | WILEGQDHAAADFAEGGGR       | 32d | 28 |
| FBgn0037146 | 715.74  | 83  | 3 | ASAVNTLADLLVSR            | 36d | 28 |
| FBgn0037146 | 906.45  | 107 | 4 | EALATVGAEHAVSLVSTR        | 36d | 28 |
| FBgn0037146 | 568.34  | 44  | 2 | EFDGATLEPR                | 36d | 28 |
| FBgn0037146 | 586.23  | 64  | 2 | GPVGVEGLLTTK              | 36d | 28 |
| FBgn0037146 | 1012.66 | 54  | 3 | IAQVLVTKPDFYNEETR         | 36d | 28 |
| FBgn0037146 | 923.93  | 35  | 1 | KVGTFTEATESANAVPVEVMAENAR | 36d | 28 |
| FBgn0037146 | 906.61  | 66  | 3 | LASIVEQVAECHLEGR          | 36d | 28 |
| FBgn0037146 | 693.2   | 66  | 3 | LNQQLTFGPPAAK             | 36d | 28 |
| FBgn0037146 | 613.31  | 36  | 1 | TWLHETLPLD                | 36d | 28 |

|             |         |     |   |                           |     |    |
|-------------|---------|-----|---|---------------------------|-----|----|
| FBgn0037146 | 715.85  | 76  | 3 | ASAVNTLADLLVSR            | 42d | 28 |
| FBgn0037146 | 906.49  | 93  | 2 | EALATVGAEHAVSLVSTR        | 42d | 28 |
| FBgn0037146 | 1119.62 | 98  | 1 | EEISDLLSMENHIDLIIPR       | 42d | 28 |
| FBgn0037146 | 568.16  | 37  | 1 | EFDGATLEPR                | 42d | 28 |
| FBgn0037146 | 586.22  | 59  | 3 | GPVGVEGLLTTK              | 42d | 28 |
| FBgn0037146 | 1012.76 | 62  | 3 | IAQVLVTKPDFYNEETR         | 42d | 28 |
| FBgn0037146 | 1385.08 | 89  | 3 | KVGTFTEATESANAVPVEVMAENAR | 42d | 28 |
| FBgn0037146 | 906.28  | 79  | 2 | LASIVEQVAECHLEGR          | 42d | 28 |
| FBgn0037146 | 409.13  | 50  | 1 | LGSAVITR                  | 42d | 28 |
| FBgn0037146 | 973.21  | 75  | 3 | LMHTYTSDDSNSEIFGK         | 42d | 28 |
| FBgn0037146 | 693.24  | 60  | 3 | LNQQLTFGPPAAK             | 42d | 28 |
| FBgn0037146 | 715.91  | 89  | 3 | ASAVNTLADLLVSR            | 46d | 28 |
| FBgn0037146 | 906.42  | 104 | 5 | EALATVGAEHAVSLVSTR        | 46d | 28 |
| FBgn0037146 | 1119.46 | 70  | 2 | EEISDLLSMENHIDLIIPR       | 46d | 28 |
| FBgn0037146 | 568.1   | 44  | 2 | EFDGATLEPR                | 46d | 28 |
| FBgn0037146 | 586.59  | 57  | 3 | GPVGVEGLLTTK              | 46d | 28 |
| FBgn0037146 | 1012.66 | 61  | 3 | IAQVLVTKPDFYNEETR         | 46d | 28 |
| FBgn0037146 | 906.42  | 79  | 3 | LASIVEQVAECHLEGR          | 46d | 28 |
| FBgn0037146 | 693.23  | 63  | 3 | LNQQLTFGPPAAK             | 46d | 28 |
| FBgn0037146 | 1320.93 | 67  | 3 | VGTFTEATESANAVPVEVMAENAR  | 46d | 28 |
| FBgn0037146 | 1000.86 | 92  | 2 | WILEGQDHAAADFAEGGGR       | 46d | 28 |
| FBgn0037146 | 715.71  | 82  | 3 | ASAVNTLADLLVSR            | 50d | 28 |
| FBgn0037146 | 906.26  | 97  | 3 | EALATVGAEHAVSLVSTR        | 50d | 28 |
| FBgn0037146 | 746.87  | 61  | 2 | EEISDLLSMENHIDLIIPR       | 50d | 28 |
| FBgn0037146 | 568.07  | 49  | 3 | EFDGATLEPR                | 50d | 28 |
| FBgn0037146 | 586.18  | 73  | 4 | GPVGVEGLLTTK              | 50d | 28 |
| FBgn0037146 | 675.5   | 54  | 3 | IAQVLVTKPDFYNEETR         | 50d | 28 |
| FBgn0037146 | 906.68  | 100 | 3 | LASIVEQVAECHLEGR          | 50d | 28 |
| FBgn0037146 | 693.49  | 71  | 3 | LNQQLTFGPPAAK             | 50d | 28 |
| FBgn0037146 | 1321.05 | 71  | 2 | VGTFTEATESANAVPVEVMAENAR  | 50d | 28 |
| FBgn0037146 | 1000.91 | 119 | 2 | WILEGQDHAAADFAEGGGR       | 50d | 28 |
| FBgn0037146 | 715.72  | 82  | 3 | ASAVNTLADLLVSR            | 52d | 28 |

|             |         |     |   |                          |      |    |
|-------------|---------|-----|---|--------------------------|------|----|
| FBgn0037146 | 906.54  | 96  | 3 | EALATVGAEHAVSLVSTR       | 52d  | 28 |
| FBgn0037146 | 746.83  | 62  | 2 | EEISDLLSMENHIDLIPR       | 52d  | 28 |
| FBgn0037146 | 568.17  | 34  | 1 | EFDGATLEPR               | 52d  | 28 |
| FBgn0037146 | 1012.55 | 68  | 2 | IAQVLVTKPDFYNEETR        | 52d  | 28 |
| FBgn0037146 | 1385    | 65  | 1 | KVGTFEATESANAVPVEVMAENAR | 52d  | 28 |
| FBgn0037146 | 906.27  | 75  | 1 | LASIVEQVAECHLEGR         | 52d  | 28 |
| FBgn0037146 | 693.58  | 75  | 2 | LNQQLTFGPPAAK            | 52d  | 28 |
| FBgn0037146 | 1321.05 | 59  | 3 | VGTFEATESANAVPVEVMAENAR  | 52d  | 28 |
| FBgn0037146 | 716.04  | 89  | 3 | ASAVNTLADLLVSR           | 56d  | 28 |
| FBgn0037146 | 906.53  | 106 | 2 | EALATVGAEHAVSLVSTR       | 56d  | 28 |
| FBgn0037146 | 586.54  | 72  | 1 | GPVGVEGLLTTK             | 56d  | 28 |
| FBgn0037146 | 906.31  | 67  | 2 | LASIVEQVAECHLEGR         | 56d  | 28 |
| FBgn0037146 | 693.22  | 61  | 2 | LNQQLTFGPPAAK            | 56d  | 28 |
| FBgn0037146 | 613.41  | 35  | 1 | TWLHETLPLD               | 56d  | 28 |
| FBgn0037146 | 1321.15 | 61  | 1 | VGTFEATESANAVPVEVMAENAR  | 56d  | 28 |
| FBgn0037238 | 1019.38 | 38  | 1 | NVPEGSYQESVGQTQGQK       | 132d | 18 |
| FBgn0037238 | 1019.27 | 87  | 3 | NVPEGSYQESVGQTQGQK       | 2d   | 28 |
| FBgn0037238 | 995.62  | 100 | 3 | SGGQVVSTQATSAGGNDYYK     | 2d   | 28 |
| FBgn0037238 | 995.77  | 105 | 3 | SGGQVVSTQATSAGGNDYYK     | 12d  | 28 |
| FBgn0037239 | 829.43  | 51  | 1 | YLYDSAFHPETGEK           | 46d  | 28 |
| FBgn0037239 | 829.4   | 50  | 1 | YLYDSAFHPETGEK           | 50d  | 28 |
| FBgn0037245 | 909.71  | 43  | 1 | YDTPVDIATPTEIIR          | 2d   | 18 |
| FBgn0037245 | 667.1   | 72  | 2 | AESAETATPVQTK            | 2d   | 28 |
| FBgn0037245 | 909.54  | 35  | 1 | YDTPVDIATPTEIIR          | 2d   | 28 |
| FBgn0037245 | 667.48  | 38  | 1 | AESAETATPVQTK            | 56d  | 28 |
| FBgn0037249 | 365.54  | 37  | 1 | PSEQIR                   | 82d  | 18 |
| FBgn0037249 | 365.79  | 41  | 2 | PSEQIR                   | 132d | 18 |
| FBgn0037249 | 365.63  | 37  | 2 | PSEQIR                   | 12d  | 28 |
| FBgn0037249 | 365.75  | 37  | 1 | PSEQIR                   | 36d  | 28 |
| FBgn0037249 | 365.71  | 37  | 1 | PSEQIR                   | 46d  | 28 |
| FBgn0037256 | 565.91  | 53  | 1 | KKTEQLLNR                | 42d  | 28 |
| FBgn0037298 | 985.2   | 34  | 1 | NFDGVVNSVETFLETGIK       | 112d | 18 |

|             |         |    |   |                        |      |    |
|-------------|---------|----|---|------------------------|------|----|
| FBgn0037298 | 985.62  | 37 | 1 | NFDGVVNSVETFLETGIK     | 12d  | 28 |
| FBgn0037314 | 875.06  | 60 | 1 | NILGGSGDFADIQSIK       | 2d   | 18 |
| FBgn0037314 | 875.1   | 48 | 1 | NILGGSGDFADIQSIK       | 2d   | 28 |
| FBgn0037314 | 875.08  | 60 | 1 | NILGGSGDFADIQSIK       | 42d  | 28 |
| FBgn0037314 | 874.54  | 71 | 1 | NILGGSGDFADIQSIK       | 46d  | 28 |
| FBgn0037314 | 875.18  | 42 | 1 | NILGGSGDFADIQSIK       | 50d  | 28 |
| FBgn0037328 | 463.05  | 35 | 1 | IHGNTGAVR              | 62d  | 18 |
| FBgn0037370 | 1151.63 | 41 | 1 | ILAAGLDVTTPEPLPIDDPLLK | 2d   | 18 |
| FBgn0037370 | 1151.87 | 53 | 1 | ILAAGLDVTTPEPLPIDDPLLK | 42d  | 18 |
| FBgn0037370 | 1151.89 | 46 | 1 | ILAAGLDVTTPEPLPIDDPLLK | 62d  | 18 |
| FBgn0037370 | 1151.72 | 42 | 1 | ILAAGLDVTTPEPLPIDDPLLK | 112d | 18 |
| FBgn0037370 | 1151.66 | 63 | 1 | ILAAGLDVTTPEPLPIDDPLLK | 42d  | 28 |
| FBgn0037370 | 1151.85 | 74 | 2 | ILAAGLDVTTPEPLPIDDPLLK | 50d  | 28 |
| FBgn0037370 | 1151.62 | 59 | 3 | ILAAGLDVTTPEPLPIDDPLLK | 56d  | 28 |
| FBgn0037379 | 400.87  | 34 | 1 | SSRCNSDTFK             | 42d  | 18 |
| FBgn0037409 | 621.01  | 35 | 1 | RRCSPPLYGIILLCK        | 2d   | 18 |
| FBgn0037433 | 1005.94 | 53 | 1 | SHQVVPDVIPEPPNQLLK     | 2d   | 28 |
| FBgn0037472 | 1092.31 | 53 | 3 | VILQKPQGLWGGDFGANER    | 2d   | 18 |
| FBgn0037472 | 728.32  | 49 | 2 | VILQKPQGLWGGDFGANER    | 142d | 18 |
| FBgn0037472 | 989.71  | 37 | 1 | ISPLTQVQAEADLTLLHK     | 12d  | 28 |
| FBgn0037483 | 770.67  | 36 | 1 | MPIHLVVDNINQRTFVMRK    | 82d  | 18 |
| FBgn0037533 | 1063.49 | 57 | 1 | VGDNYVLSQFEDGYDLK      | 2d   | 28 |
| FBgn0037537 | 693.35  | 47 | 2 | DLPDLMDIPEVK           | 56d  | 28 |
| FBgn0037540 | 399.33  | 35 | 1 | KRLQALFYR              | 32d  | 28 |
| FBgn0037555 | 710.82  | 35 | 1 | NRNYAQQQGLTK           | 52d  | 28 |
| FBgn0037580 | 998.38  | 54 | 1 | TYEPTHEGYIQSWVER       | 2d   | 18 |
| FBgn0037580 | 932.8   | 92 | 1 | YPNTDIDDLLESIVEK       | 42d  | 18 |
| FBgn0037580 | 932.83  | 60 | 1 | YPNTDIDDLLESIVEK       | 102d | 18 |
| FBgn0037580 | 933.16  | 73 | 1 | YPNTDIDDLLESIVEK       | 112d | 18 |
| FBgn0037580 | 932.83  | 39 | 1 | YPNTDIDDLLESIVEK       | 122d | 18 |
| FBgn0037580 | 932.58  | 59 | 1 | YPNTDIDDLLESIVEK       | 142d | 18 |
| FBgn0037607 | 971.42  | 54 | 2 | TIPGSTIFYPSDAVSTER     | 42d  | 18 |

|             |         |     |   |                             |      |    |
|-------------|---------|-----|---|-----------------------------|------|----|
| FBgn0037607 | 971.5   | 61  | 2 | TIPGSTIFYPSDAVSTER          | 62d  | 18 |
| FBgn0037607 | 1299.25 | 64  | 1 | VVVVEDHYQQGGLGEAVLSALAGER   | 62d  | 18 |
| FBgn0037607 | 1299.35 | 55  | 1 | VVVVEDHYQQGGLGEAVLSALAGER   | 82d  | 18 |
| FBgn0037607 | 971.32  | 43  | 1 | TIPGSTIFYPSDAVSTER          | 112d | 18 |
| FBgn0037607 | 1299.39 | 56  | 1 | VVVVEDHYQQGGLGEAVLSALAGER   | 112d | 18 |
| FBgn0037607 | 1299.3  | 88  | 1 | VVVVEDHYQQGGLGEAVLSALAGER   | 122d | 18 |
| FBgn0037607 | 971.56  | 35  | 1 | TIPGSTIFYPSDAVSTER          | 142d | 18 |
| FBgn0037607 | 1299.22 | 53  | 1 | VVVVEDHYQQGGLGEAVLSALAGER   | 2d   | 28 |
| FBgn0037607 | 971.42  | 39  | 1 | TIPGSTIFYPSDAVSTER          | 12d  | 28 |
| FBgn0037607 | 971.61  | 37  | 1 | TIPGSTIFYPSDAVSTER          | 22d  | 28 |
| FBgn0037607 | 971.48  | 38  | 2 | TIPGSTIFYPSDAVSTER          | 32d  | 28 |
| FBgn0037607 | 971.5   | 57  | 2 | TIPGSTIFYPSDAVSTER          | 36d  | 28 |
| FBgn0037607 | 866.59  | 41  | 1 | VVVVEDHYQQGGLGEAVLSALAGER   | 36d  | 28 |
| FBgn0037607 | 665.01  | 41  | 1 | TGAAPDVDINNIK               | 42d  | 28 |
| FBgn0037607 | 971.46  | 54  | 2 | TIPGSTIFYPSDAVSTER          | 42d  | 28 |
| FBgn0037624 | 1243.22 | 67  | 1 | TVAVEPVAADTTTPDNAPAVSTEGSGK | 132d | 18 |
| FBgn0037637 | 924.43  | 38  | 1 | DVTVGTGLVGAPACGDVMK         | 42d  | 18 |
| FBgn0037643 | 1068.98 | 108 | 2 | LYGGEPANFLDVGGGATAEAVK      | 2d   | 18 |
| FBgn0037643 | 704.3   | 72  | 2 | MDVNFEIPDAQK                | 2d   | 18 |
| FBgn0037643 | 783.78  | 85  | 3 | VVYDPQTAEELSSK              | 2d   | 18 |
| FBgn0037643 | 675.52  | 63  | 3 | AADLAVHLAQIVK               | 22d  | 18 |
| FBgn0037643 | 1068.87 | 54  | 1 | LYGGEPANFLDVGGGATAEAVK      | 22d  | 18 |
| FBgn0037643 | 704.16  | 82  | 3 | MDVNFEIPDAQK                | 22d  | 18 |
| FBgn0037643 | 783.8   | 88  | 3 | VVYDPQTAEELSSK              | 22d  | 18 |
| FBgn0037643 | 675.24  | 53  | 2 | AADLAVHLAQIVK               | 42d  | 18 |
| FBgn0037643 | 1068.85 | 81  | 3 | LYGGEPANFLDVGGGATAEAVK      | 42d  | 18 |
| FBgn0037643 | 704.3   | 72  | 1 | MDVNFEIPDAQK                | 42d  | 18 |
| FBgn0037643 | 675.5   | 61  | 1 | AADLAVHLAQIVK               | 62d  | 18 |
| FBgn0037643 | 507.93  | 58  | 2 | FDDNAEFR                    | 62d  | 18 |
| FBgn0037643 | 1068.9  | 95  | 3 | LYGGEPANFLDVGGGATAEAVK      | 62d  | 18 |
| FBgn0037643 | 783.76  | 73  | 2 | VVYDPQTAEELSSK              | 62d  | 18 |
| FBgn0037643 | 675.36  | 63  | 2 | AADLAVHLAQIVK               | 82d  | 18 |

|             |         |    |   |                                       |      |    |
|-------------|---------|----|---|---------------------------------------|------|----|
| FBgn0037643 | 510.05  | 34 | 1 | DWTQEDPK                              | 82d  | 18 |
| FBgn0037643 | 1202.31 | 39 | 1 | EGGV DIEEVAASSPDAILYEPIDIGTGLTSEQA EK | 82d  | 18 |
| FBgn0037643 | 507.68  | 52 | 2 | FDDNAEFR                              | 82d  | 18 |
| FBgn0037643 | 1068.95 | 75 | 3 | LYGGEPANFLDVGGGATAEAVK                | 82d  | 18 |
| FBgn0037643 | 704.27  | 79 | 1 | MDVNFEIPDAQK                          | 82d  | 18 |
| FBgn0037643 | 784.13  | 83 | 3 | VVYDPQTAEELSSK                        | 82d  | 18 |
| FBgn0037643 | 675.21  | 41 | 2 | AADLAVHLAQIVK                         | 102d | 18 |
| FBgn0037643 | 1068.73 | 84 | 1 | LYGGEPANFLDVGGGATAEAVK                | 102d | 18 |
| FBgn0037643 | 704.19  | 61 | 2 | MDVNFEIPDAQK                          | 102d | 18 |
| FBgn0037643 | 675.57  | 58 | 2 | AADLAVHLAQIVK                         | 112d | 18 |
| FBgn0037643 | 1068.98 | 95 | 2 | LYGGEPANFLDVGGGATAEAVK                | 112d | 18 |
| FBgn0037643 | 704.2   | 72 | 2 | MDVNFEIPDAQK                          | 112d | 18 |
| FBgn0037643 | 783.99  | 91 | 1 | VVYDPQTAEELSSK                        | 112d | 18 |
| FBgn0037643 | 675.43  | 64 | 2 | AADLAVHLAQIVK                         | 122d | 18 |
| FBgn0037643 | 1068.95 | 89 | 2 | LYGGEPANFLDVGGGATAEAVK                | 122d | 18 |
| FBgn0037643 | 704.01  | 86 | 3 | MDVNFEIPDAQK                          | 122d | 18 |
| FBgn0037643 | 531.26  | 49 | 1 | MIDQLLVTK                             | 122d | 18 |
| FBgn0037643 | 784.08  | 70 | 1 | VVYDPQTAEELSSK                        | 122d | 18 |
| FBgn0037643 | 675.47  | 74 | 3 | AADLAVHLAQIVK                         | 132d | 18 |
| FBgn0037643 | 1069.11 | 76 | 2 | LYGGEPANFLDVGGGATAEAVK                | 132d | 18 |
| FBgn0037643 | 704.16  | 53 | 1 | MDVNFEIPDAQK                          | 132d | 18 |
| FBgn0037643 | 783.91  | 70 | 2 | VVYDPQTAEELSSK                        | 132d | 18 |
| FBgn0037643 | 675.3   | 48 | 1 | AADLAVHLAQIVK                         | 142d | 18 |
| FBgn0037643 | 1069.17 | 86 | 3 | LYGGEPANFLDVGGGATAEAVK                | 142d | 18 |
| FBgn0037643 | 704.39  | 66 | 3 | MDVNFEIPDAQK                          | 142d | 18 |
| FBgn0037643 | 507.88  | 53 | 1 | FDDNAEFR                              | 2d   | 28 |
| FBgn0037643 | 1069.03 | 92 | 3 | LYGGEPANFLDVGGGATAEAVK                | 2d   | 28 |
| FBgn0037643 | 704.2   | 70 | 3 | MDVNFEIPDAQK                          | 2d   | 28 |
| FBgn0037643 | 783.89  | 79 | 3 | VVYDPQTAEELSSK                        | 2d   | 28 |
| FBgn0037643 | 675.42  | 63 | 2 | AADLAVHLAQIVK                         | 12d  | 28 |
| FBgn0037643 | 507.79  | 52 | 1 | FDDNAEFR                              | 12d  | 28 |
| FBgn0037643 | 1068.85 | 99 | 3 | LYGGEPANFLDVGGGATAEAVK                | 12d  | 28 |



|             |         |    |   |                       |     |    |
|-------------|---------|----|---|-----------------------|-----|----|
| FBgn0037643 | 704.32  | 77 | 2 | MDVNFEIPDAQK          | 12d | 28 |
| FBgn0037643 | 784.07  | 73 | 2 | VVYDPQTAEEELSSK       | 12d | 28 |
| FBgn0037643 | 675.5   | 71 | 3 | AADLAVHLAQIVK         | 22d | 28 |
| FBgn0037643 | 507.59  | 53 | 1 | FDDNAEFR              | 22d | 28 |
| FBgn0037643 | 704.36  | 55 | 1 | MDVNFEIPDAQK          | 22d | 28 |
| FBgn0037643 | 783.77  | 72 | 3 | VVYDPQTAEEELSSK       | 22d | 28 |
| FBgn0037643 | 675.52  | 63 | 3 | AADLAVHLAQIVK         | 32d | 28 |
| FBgn0037643 | 635.78  | 40 | 1 | DLNLNMPVVVR           | 32d | 28 |
| FBgn0037643 | 507.52  | 59 | 3 | FDDNAEFR              | 32d | 28 |
| FBgn0037643 | 704.43  | 95 | 3 | MDVNFEIPDAQK          | 32d | 28 |
| FBgn0037643 | 531.04  | 60 | 3 | MIDQLLVTK             | 32d | 28 |
| FBgn0037643 | 783.79  | 83 | 2 | VVYDPQTAEEELSSK       | 32d | 28 |
| FBgn0037643 | 675.3   | 59 | 3 | AADLAVHLAQIVK         | 36d | 28 |
| FBgn0037643 | 636.02  | 51 | 1 | DLNLNMPVVVR           | 36d | 28 |
| FBgn0037643 | 507.76  | 52 | 1 | FDDNAEFR              | 36d | 28 |
| FBgn0037643 | 1068.91 | 70 | 2 | LYGGEPANFLDVGGATAEAVK | 36d | 28 |
| FBgn0037643 | 704.23  | 70 | 3 | MDVNFEIPDAQK          | 36d | 28 |
| FBgn0037643 | 531.38  | 65 | 3 | MIDQLLVTK             | 36d | 28 |
| FBgn0037643 | 783.85  | 67 | 2 | VVYDPQTAEEELSSK       | 36d | 28 |
| FBgn0037643 | 675.37  | 58 | 2 | AADLAVHLAQIVK         | 42d | 28 |
| FBgn0037643 | 635.95  | 60 | 2 | DLNLNMPVVVR           | 42d | 28 |
| FBgn0037643 | 507.75  | 63 | 3 | FDDNAEFR              | 42d | 28 |
| FBgn0037643 | 1068.75 | 88 | 3 | LYGGEPANFLDVGGATAEAVK | 42d | 28 |
| FBgn0037643 | 704.23  | 91 | 3 | MDVNFEIPDAQK          | 42d | 28 |
| FBgn0037643 | 783.88  | 83 | 3 | VVYDPQTAEEELSSK       | 42d | 28 |
| FBgn0037643 | 675.55  | 73 | 2 | AADLAVHLAQIVK         | 46d | 28 |
| FBgn0037643 | 507.68  | 57 | 2 | FDDNAEFR              | 46d | 28 |
| FBgn0037643 | 1068.84 | 77 | 3 | LYGGEPANFLDVGGATAEAVK | 46d | 28 |
| FBgn0037643 | 704.14  | 77 | 1 | MDVNFEIPDAQK          | 46d | 28 |
| FBgn0037643 | 783.96  | 78 | 2 | VVYDPQTAEEELSSK       | 46d | 28 |
| FBgn0037643 | 675.24  | 70 | 2 | AADLAVHLAQIVK         | 50d | 28 |
| FBgn0037643 | 507.53  | 63 | 1 | FDDNAEFR              | 50d | 28 |

|             |         |     |   |                        |      |    |
|-------------|---------|-----|---|------------------------|------|----|
| FBgn0037643 | 1069.04 | 90  | 2 | LYGGEPANFLDVGGGATAEAVK | 50d  | 28 |
| FBgn0037643 | 704.3   | 85  | 4 | MDVNFEIPDAQK           | 50d  | 28 |
| FBgn0037643 | 531.28  | 56  | 1 | MIDQLLVTK              | 50d  | 28 |
| FBgn0037643 | 783.91  | 70  | 2 | VVYDPQTAEELSSK         | 50d  | 28 |
| FBgn0037643 | 675.5   | 72  | 3 | AADLAVHLAQIVK          | 52d  | 28 |
| FBgn0037643 | 689.43  | 46  | 2 | CDVIAEGIISATK          | 52d  | 28 |
| FBgn0037643 | 635.97  | 46  | 1 | DLNLNMPVVVR            | 52d  | 28 |
| FBgn0037643 | 507.84  | 46  | 1 | FDDNAEFR               | 52d  | 28 |
| FBgn0037643 | 1068.94 | 81  | 1 | LYGGEPANFLDVGGGATAEAVK | 52d  | 28 |
| FBgn0037643 | 704.33  | 66  | 3 | MDVNFEIPDAQK           | 52d  | 28 |
| FBgn0037643 | 531.24  | 42  | 1 | MIDQLLVTK              | 52d  | 28 |
| FBgn0037643 | 783.77  | 75  | 2 | VVYDPQTAEELSSK         | 52d  | 28 |
| FBgn0037643 | 675.36  | 68  | 2 | AADLAVHLAQIVK          | 56d  | 28 |
| FBgn0037643 | 635.89  | 59  | 2 | DLNLNMPVVVR            | 56d  | 28 |
| FBgn0037643 | 1068.91 | 112 | 3 | LYGGEPANFLDVGGGATAEAVK | 56d  | 28 |
| FBgn0037643 | 704.43  | 73  | 2 | MDVNFEIPDAQK           | 56d  | 28 |
| FBgn0037733 | 890.91  | 43  | 1 | DDFPAPPYPYTDPER        | 2d   | 18 |
| FBgn0037750 | 459.62  | 37  | 1 | KPVTDFLSELK            | 42d  | 28 |
| FBgn0037855 | 453.28  | 35  | 1 | LKQSGDEK               | 50d  | 28 |
| FBgn0037873 | 922.49  | 48  | 2 | VVSV AETQKDESFFEK      | 2d   | 18 |
| FBgn0037873 | 922.24  | 53  | 1 | VVSV AETQKDESFFEK      | 82d  | 18 |
| FBgn0037874 | 707.6   | 80  | 2 | LVDDVIYEVY GK          | 2d   | 28 |
| FBgn0037874 | 525.45  | 34  | 1 | SPDQVDIFK              | 46d  | 28 |
| FBgn0037891 | 588.19  | 40  | 1 | AAAPAAAPAPAAPK         | 2d   | 18 |
| FBgn0037891 | 689     | 35  | 2 | DGDTV KPGQALFK         | 2d   | 18 |
| FBgn0037891 | 716.5   | 80  | 3 | AAPRPPPPAPVAALKPAVAQVK | 22d  | 18 |
| FBgn0037891 | 688.97  | 40  | 1 | DGDTV KPGQALFK         | 22d  | 18 |
| FBgn0037891 | 688.83  | 42  | 3 | DGDTV KPGQALFK         | 42d  | 18 |
| FBgn0037891 | 619.84  | 53  | 1 | AAVENPAIIVAGL          | 62d  | 18 |
| FBgn0037891 | 716.55  | 78  | 1 | AAPRPPPPAPVAALKPAVAQVK | 82d  | 18 |
| FBgn0037891 | 688.96  | 38  | 1 | DGDTV KPGQALFK         | 82d  | 18 |
| FBgn0037891 | 688.97  | 37  | 1 | DGDTV KPGQALFK         | 102d | 18 |

|             |         |    |   |                        |      |    |
|-------------|---------|----|---|------------------------|------|----|
| FBgn0037891 | 688.47  | 35 | 1 | DGDTVKPGQALFK          | 112d | 18 |
| FBgn0037891 | 689.05  | 42 | 1 | DGDTVKPGQALFK          | 122d | 18 |
| FBgn0037891 | 524.37  | 50 | 1 | FGFMSIFAK              | 122d | 18 |
| FBgn0037891 | 588.34  | 55 | 2 | AAAPAAAPAPAAPK         | 142d | 18 |
| FBgn0037891 | 588.25  | 43 | 2 | AAAPAAAPAPAAPK         | 2d   | 28 |
| FBgn0037891 | 619.52  | 54 | 2 | AAVENPAIIVAGL          | 2d   | 28 |
| FBgn0037891 | 588.25  | 39 | 1 | AAAPAAAPAPAAPK         | 12d  | 28 |
| FBgn0037891 | 688.79  | 39 | 2 | DGDTVKPGQALFK          | 12d  | 28 |
| FBgn0037891 | 619.68  | 35 | 1 | AAVENPAIIVAGL          | 22d  | 28 |
| FBgn0037891 | 587.64  | 38 | 1 | AAAPAAAPAPAAPK         | 32d  | 28 |
| FBgn0037891 | 716.53  | 73 | 1 | AAPRPPPPAPVAALKPAVAQVK | 32d  | 28 |
| FBgn0037891 | 619.86  | 57 | 2 | AAVENPAIIVAGL          | 32d  | 28 |
| FBgn0037891 | 619.77  | 81 | 2 | AAVENPAIIVAGL          | 36d  | 28 |
| FBgn0037891 | 688.94  | 41 | 2 | DGDTVKPGQALFK          | 36d  | 28 |
| FBgn0037891 | 619.95  | 35 | 1 | AAVENPAIIVAGL          | 42d  | 28 |
| FBgn0037891 | 688.99  | 43 | 1 | DGDTVKPGQALFK          | 42d  | 28 |
| FBgn0037891 | 716.59  | 74 | 1 | AAPRPPPPAPVAALKPAVAQVK | 46d  | 28 |
| FBgn0037891 | 588.23  | 35 | 1 | AAAPAAAPAPAAPK         | 50d  | 28 |
| FBgn0037891 | 689.05  | 40 | 3 | DGDTVKPGQALFK          | 50d  | 28 |
| FBgn0037891 | 620.03  | 58 | 1 | AAVENPAIIVAGL          | 52d  | 28 |
| FBgn0037891 | 688.87  | 44 | 2 | DGDTVKPGQALFK          | 52d  | 28 |
| FBgn0037891 | 588.43  | 41 | 2 | AAAPAAAPAPAAPK         | 56d  | 28 |
| FBgn0037979 | 715.86  | 36 | 1 | VQEMDRLAKIVK           | 42d  | 18 |
| FBgn0037979 | 715.88  | 38 | 1 | VQEMDRLAKIVK           | 12d  | 28 |
| FBgn0038028 | 1082.94 | 35 | 1 | YKQLQKLVEASEAVTELTN    | 42d  | 18 |
| FBgn0038028 | 1082.94 | 37 | 1 | YKQLQKLVEASEAVTELTN    | 62d  | 18 |
| FBgn0038028 | 1083.08 | 37 | 1 | YKQLQKLVEASEAVTELTN    | 102d | 18 |
| FBgn0038028 | 1082.91 | 34 | 1 | YKQLQKLVEASEAVTELTN    | 122d | 18 |
| FBgn0038028 | 1083.09 | 39 | 1 | YKQLQKLVEASEAVTELTN    | 36d  | 28 |
| FBgn0038034 | 897.45  | 67 | 2 | LYEEVQQVDQDLEGK        | 82d  | 18 |
| FBgn0038043 | 445.18  | 34 | 1 | LFIRVIK                | 132d | 18 |
| FBgn0038080 | 955.95  | 44 | 1 | ETGVLPASINIPLSELEK     | 22d  | 18 |

|             |         |     |   |                            |      |    |
|-------------|---------|-----|---|----------------------------|------|----|
| FBgn0038080 | 956.17  | 39  | 1 | ETGVLPASINIPLSELEK         | 32d  | 28 |
| FBgn0038088 | 989.84  | 75  | 2 | SEDEILTDFLHNFEGGR          | 2d   | 18 |
| FBgn0038088 | 990.51  | 75  | 2 | SEDEILTDFLHNFEGGR          | 42d  | 18 |
| FBgn0038088 | 660.77  | 67  | 3 | SEDEILTDFLHNFEGGR          | 82d  | 18 |
| FBgn0038088 | 660.78  | 72  | 2 | SEDEILTDFLHNFEGGR          | 112d | 18 |
| FBgn0038088 | 696.35  | 53  | 1 | ALNEEEFITGIR               | 122d | 18 |
| FBgn0038088 | 990.42  | 55  | 1 | SEDEILTDFLHNFEGGR          | 122d | 18 |
| FBgn0038088 | 990.56  | 69  | 2 | SEDEILTDFLHNFEGGR          | 132d | 18 |
| FBgn0038088 | 989.62  | 75  | 2 | SEDEILTDFLHNFEGGR          | 142d | 18 |
| FBgn0038088 | 990.21  | 77  | 1 | SEDEILTDFLHNFEGGR          | 12d  | 28 |
| FBgn0038088 | 660.7   | 40  | 1 | SEDEILTDFLHNFEGGR          | 22d  | 28 |
| FBgn0038088 | 990.36  | 91  | 3 | SEDEILTDFLHNFEGGR          | 32d  | 28 |
| FBgn0038088 | 990.48  | 107 | 3 | SEDEILTDFLHNFEGGR          | 36d  | 28 |
| FBgn0038088 | 660.64  | 50  | 2 | SEDEILTDFLHNFEGGR          | 42d  | 28 |
| FBgn0038088 | 990.18  | 38  | 1 | SEDEILTDFLHNFEGGR          | 46d  | 28 |
| FBgn0038088 | 660.8   | 61  | 2 | SEDEILTDFLHNFEGGR          | 50d  | 28 |
| FBgn0038088 | 989.56  | 69  | 3 | SEDEILTDFLHNFEGGR          | 52d  | 28 |
| FBgn0038088 | 696.69  | 60  | 2 | ALNEEEFITGIR               | 56d  | 28 |
| FBgn0038088 | 990.37  | 78  | 3 | SEDEILTDFLHNFEGGR          | 56d  | 28 |
| FBgn0038145 | 845.49  | 91  | 2 | MAYDEDDGGYQDGPR            | 132d | 18 |
| FBgn0038145 | 833.83  | 81  | 3 | AISQAYEVLSDADKR            | 2d   | 28 |
| FBgn0038145 | 845.23  | 94  | 3 | MAYDEDDGGYQDGPR            | 2d   | 28 |
| FBgn0038145 | 845.13  | 70  | 2 | MAYDEDDGGYQDGPR            | 12d  | 28 |
| FBgn0038145 | 1469.22 | 41  | 1 | QCLPPAPEVDIPIDAEQTVLEDFDPK | 52d  | 28 |
| FBgn0038186 | 472.38  | 37  | 1 | ITKYDLVVVVHK               | 22d  | 28 |
| FBgn0038224 | 578.41  | 44  | 2 | ALAELSKPTPK                | 2d   | 28 |
| FBgn0038236 | 1098.8  | 34  | 1 | IPGIGLPILGSSLENIITYK       | 12d  | 28 |
| FBgn0038243 | 1145.53 | 45  | 1 | EALELLDATLAQLANGDGPSYK     | 56d  | 28 |
| FBgn0038271 | 734.84  | 57  | 2 | ADLTDYIQTHYK               | 2d   | 18 |
| FBgn0038271 | 734.94  | 62  | 1 | ADLTDYIQTHYK               | 22d  | 18 |
| FBgn0038271 | 734.69  | 60  | 3 | ADLTDYIQTHYK               | 42d  | 18 |
| FBgn0038271 | 708.04  | 83  | 2 | AVEILADIHQNSK              | 42d  | 18 |

|             |        |     |   |                     |      |    |
|-------------|--------|-----|---|---------------------|------|----|
| FBgn0038271 | 659.28 | 76  | 1 | SQGGGANNASNLAR      | 42d  | 18 |
| FBgn0038271 | 735.01 | 89  | 2 | ADLTDYIQTHYK        | 62d  | 18 |
| FBgn0038271 | 707.97 | 90  | 1 | AVEILADIQNSK        | 62d  | 18 |
| FBgn0038271 | 516.02 | 37  | 1 | IDAVSVGNVR          | 62d  | 18 |
| FBgn0038271 | 734.93 | 96  | 2 | ADLTDYIQTHYK        | 82d  | 18 |
| FBgn0038271 | 708.13 | 98  | 2 | AVEILADIQNSK        | 82d  | 18 |
| FBgn0038271 | 515.91 | 63  | 1 | IDAVSVGNVR          | 82d  | 18 |
| FBgn0038271 | 734.74 | 59  | 1 | ADLTDYIQTHYK        | 102d | 18 |
| FBgn0038271 | 708.08 | 76  | 1 | AVEILADIQNSK        | 102d | 18 |
| FBgn0038271 | 659.2  | 54  | 1 | SQGGGANNASNLAR      | 102d | 18 |
| FBgn0038271 | 734.98 | 64  | 3 | ADLTDYIQTHYK        | 112d | 18 |
| FBgn0038271 | 734.94 | 68  | 1 | ADLTDYIQTHYK        | 122d | 18 |
| FBgn0038271 | 659.36 | 85  | 2 | SQGGGANNASNLAR      | 122d | 18 |
| FBgn0038271 | 734.54 | 64  | 2 | ADLTDYIQTHYK        | 132d | 18 |
| FBgn0038271 | 736.31 | 58  | 1 | NIQSIGKADLTDYIQTHYK | 132d | 18 |
| FBgn0038271 | 734.96 | 82  | 2 | ADLTDYIQTHYK        | 142d | 18 |
| FBgn0038271 | 736.29 | 60  | 1 | NIQSIGKADLTDYIQTHYK | 142d | 18 |
| FBgn0038271 | 659.33 | 84  | 2 | SQGGGANNASNLAR      | 142d | 18 |
| FBgn0038271 | 734.76 | 89  | 2 | ADLTDYIQTHYK        | 2d   | 28 |
| FBgn0038271 | 707.88 | 39  | 1 | AVEILADIQNSK        | 2d   | 28 |
| FBgn0038271 | 659.26 | 103 | 2 | SQGGGANNASNLAR      | 2d   | 28 |
| FBgn0038271 | 650.15 | 56  | 2 | TLLNIPATQVTK        | 2d   | 28 |
| FBgn0038271 | 734.76 | 70  | 2 | ADLTDYIQTHYK        | 12d  | 28 |
| FBgn0038271 | 708.03 | 65  | 1 | AVEILADIQNSK        | 12d  | 28 |
| FBgn0038271 | 650.41 | 46  | 1 | TLLNIPATQVTK        | 12d  | 28 |
| FBgn0038271 | 734.98 | 54  | 2 | ADLTDYIQTHYK        | 22d  | 28 |
| FBgn0038271 | 734.76 | 71  | 2 | ADLTDYIQTHYK        | 32d  | 28 |
| FBgn0038271 | 734.7  | 81  | 3 | ADLTDYIQTHYK        | 36d  | 28 |
| FBgn0038271 | 659.05 | 78  | 1 | SQGGGANNASNLAR      | 36d  | 28 |
| FBgn0038271 | 734.8  | 71  | 2 | ADLTDYIQTHYK        | 42d  | 28 |
| FBgn0038271 | 808.3  | 34  | 1 | NNGVAHFLEHMAFK      | 42d  | 28 |
| FBgn0038271 | 659.25 | 76  | 1 | SQGGGANNASNLAR      | 42d  | 28 |

|             |         |    |   |                         |      |    |
|-------------|---------|----|---|-------------------------|------|----|
| FBgn0038271 | 734.73  | 59 | 2 | ADLTDYIQTHYK            | 46d  | 28 |
| FBgn0038271 | 735.08  | 55 | 1 | ADLTDYIQTHYK            | 50d  | 28 |
| FBgn0038271 | 734.7   | 62 | 3 | ADLTDYIQTHYK            | 52d  | 28 |
| FBgn0038271 | 734.77  | 67 | 1 | ADLTDYIQTHYK            | 56d  | 28 |
| FBgn0038271 | 708.11  | 81 | 1 | AVEILADIQNSK            | 56d  | 28 |
| FBgn0038294 | 683.74  | 54 | 1 | SIYDEPATANER            | 2d   | 18 |
| FBgn0038294 | 683.56  | 62 | 3 | SIYDEPATANER            | 22d  | 18 |
| FBgn0038294 | 855.09  | 66 | 3 | DLLSPSPNLPISIVR         | 42d  | 18 |
| FBgn0038294 | 904.65  | 66 | 1 | DPFWWDVDDLVPFR          | 42d  | 18 |
| FBgn0038294 | 904.22  | 42 | 1 | DPFWWDVDDLVPFR          | 62d  | 18 |
| FBgn0038294 | 683.54  | 54 | 4 | SIYDEPATANER            | 62d  | 18 |
| FBgn0038294 | 683.78  | 56 | 4 | SIYDEPATANER            | 82d  | 18 |
| FBgn0038294 | 855.16  | 41 | 1 | DLLSPSPNLPISIVR         | 102d | 18 |
| FBgn0038294 | 683.97  | 42 | 1 | SIYDEPATANER            | 122d | 18 |
| FBgn0038294 | 855.06  | 57 | 1 | DLLSPSPNLPISIVR         | 142d | 18 |
| FBgn0038294 | 683.48  | 57 | 7 | SIYDEPATANER            | 2d   | 28 |
| FBgn0038294 | 855.16  | 41 | 2 | DLLSPSPNLPISIVR         | 12d  | 28 |
| FBgn0038294 | 683.76  | 57 | 5 | SIYDEPATANER            | 12d  | 28 |
| FBgn0038294 | 855.07  | 50 | 2 | DLLSPSPNLPISIVR         | 22d  | 28 |
| FBgn0038294 | 855.12  | 41 | 2 | DLLSPSPNLPISIVR         | 32d  | 28 |
| FBgn0038294 | 683.54  | 57 | 2 | SIYDEPATANER            | 32d  | 28 |
| FBgn0038294 | 854.93  | 46 | 1 | DLLSPSPNLPISIVR         | 36d  | 28 |
| FBgn0038294 | 683.72  | 50 | 2 | SIYDEPATANER            | 36d  | 28 |
| FBgn0038294 | 854.93  | 54 | 3 | DLLSPSPNLPISIVR         | 42d  | 28 |
| FBgn0038294 | 904.49  | 68 | 2 | DPFWWDVDDLVPFR          | 42d  | 28 |
| FBgn0038294 | 683.64  | 56 | 1 | SIYDEPATANER            | 42d  | 28 |
| FBgn0038294 | 854.79  | 49 | 3 | DLLSPSPNLPISIVR         | 46d  | 28 |
| FBgn0038294 | 854.89  | 55 | 1 | DLLSPSPNLPISIVR         | 50d  | 28 |
| FBgn0038294 | 855     | 46 | 2 | DLLSPSPNLPISIVR         | 52d  | 28 |
| FBgn0038294 | 855.13  | 46 | 1 | DLLSPSPNLPISIVR         | 56d  | 28 |
| FBgn0038326 | 1262.68 | 68 | 1 | NFSADSVEGILENLQNDGSEWAK | 82d  | 18 |
| FBgn0038326 | 1262.46 | 57 | 1 | NFSADSVEGILENLQNDGSEWAK | 112d | 18 |

|             |         |    |   |                         |      |    |
|-------------|---------|----|---|-------------------------|------|----|
| FBgn0038326 | 1262.64 | 70 | 1 | NFSADSVEGILENLQNDGSEWAK | 132d | 18 |
| FBgn0038326 | 1262.71 | 68 | 1 | NFSADSVEGILENLQNDGSEWAK | 12d  | 28 |
| FBgn0038326 | 1262.72 | 68 | 2 | NFSADSVEGILENLQNDGSEWAK | 46d  | 28 |
| FBgn0038326 | 1262.8  | 41 | 1 | NFSADSVEGILENLQNDGSEWAK | 52d  | 28 |
| FBgn0038347 | 1230.4  | 50 | 1 | AFGQLSTLLQPDAVLPDASPVYR | 112d | 18 |
| FBgn0038347 | 1230.28 | 46 | 1 | AFGQLSTLLQPDAVLPDASPVYR | 132d | 18 |
| FBgn0038368 | 732.46  | 38 | 1 | TIQQELLKLHLK            | 22d  | 18 |
| FBgn0038405 | 721.83  | 53 | 1 | GTYGYVDPDGNKR           | 2d   | 18 |
| FBgn0038405 | 721.69  | 36 | 1 | GTYGYVDPDGNKR           | 2d   | 28 |
| FBgn0038519 | 703.91  | 43 | 1 | GLAVVDNSFQEVK           | 12d  | 28 |
| FBgn0038519 | 954.7   | 53 | 2 | ISADYDVLLDKEGISLR       | 12d  | 28 |
| FBgn0038519 | 954.67  | 41 | 1 | ISADYDVLLDKEGISLR       | 46d  | 28 |
| FBgn0038569 | 743.69  | 43 | 1 | NATLNSAGGKRQLR          | 62d  | 18 |
| FBgn0038569 | 743.92  | 40 | 1 | NATLNSAGGKRQLR          | 12d  | 28 |
| FBgn0038570 | 545.76  | 34 | 1 | LLADPAGGFTK             | 2d   | 18 |
| FBgn0038570 | 759.32  | 45 | 1 | THLPGYVSSADELK          | 2d   | 18 |
| FBgn0038570 | 937.82  | 85 | 2 | VGDSLPAVDLFDSPANK       | 2d   | 18 |
| FBgn0038570 | 768.81  | 58 | 2 | ALDVTIDLPLGGVR          | 22d  | 18 |
| FBgn0038570 | 759.1   | 58 | 3 | THLPGYVSSADELK          | 22d  | 18 |
| FBgn0038570 | 769.03  | 72 | 3 | ALDVTIDLPLGGVR          | 42d  | 18 |
| FBgn0038570 | 758.89  | 47 | 3 | THLPGYVSSADELK          | 42d  | 18 |
| FBgn0038570 | 937.91  | 78 | 3 | VGDSLPAVDLFDSPANK       | 42d  | 18 |
| FBgn0038570 | 826.01  | 51 | 2 | VIIFGVPGAFTPGCSK        | 42d  | 18 |
| FBgn0038570 | 1194.98 | 49 | 2 | VTELNVEPDGTGLSCSLANNIGK | 42d  | 18 |
| FBgn0038570 | 768.88  | 54 | 2 | ALDVTIDLPLGGVR          | 82d  | 18 |
| FBgn0038570 | 759.38  | 53 | 2 | THLPGYVSSADELK          | 82d  | 18 |
| FBgn0038570 | 938.06  | 65 | 2 | VGDSLPAVDLFDSPANK       | 82d  | 18 |
| FBgn0038570 | 1195    | 80 | 1 | VTELNVEPDGTGLSCSLANNIGK | 82d  | 18 |
| FBgn0038570 | 769     | 36 | 1 | ALDVTIDLPLGGVR          | 102d | 18 |
| FBgn0038570 | 759.53  | 42 | 1 | THLPGYVSSADELK          | 102d | 18 |
| FBgn0038570 | 937.98  | 56 | 1 | VGDSLPAVDLFDSPANK       | 102d | 18 |
| FBgn0038570 | 1195.24 | 61 | 3 | VTELNVEPDGTGLSCSLANNIGK | 102d | 18 |

|             |         |    |   |                         |      |    |
|-------------|---------|----|---|-------------------------|------|----|
| FBgn0038570 | 769.13  | 51 | 1 | ALDVTIDLPPPLGGVR        | 112d | 18 |
| FBgn0038570 | 759.43  | 38 | 1 | THLPGYVSSADELK          | 112d | 18 |
| FBgn0038570 | 937.99  | 66 | 3 | VGDSLPAVDLFDSPANK       | 112d | 18 |
| FBgn0038570 | 767.86  | 41 | 1 | ALDVTIDLPPPLGGVR        | 122d | 18 |
| FBgn0038570 | 938.2   | 53 | 2 | VGDSLPAVDLFDSPANK       | 122d | 18 |
| FBgn0038570 | 545.33  | 41 | 2 | LLADPAGGFTK             | 132d | 18 |
| FBgn0038570 | 759.53  | 60 | 3 | THLPGYVSSADELK          | 132d | 18 |
| FBgn0038570 | 938.18  | 43 | 1 | VGDSLPAVDLFDSPANK       | 132d | 18 |
| FBgn0038570 | 759.35  | 53 | 2 | THLPGYVSSADELK          | 142d | 18 |
| FBgn0038570 | 545.55  | 62 | 2 | LLADPAGGFTK             | 2d   | 28 |
| FBgn0038570 | 759.22  | 45 | 2 | THLPGYVSSADELK          | 2d   | 28 |
| FBgn0038570 | 937.77  | 72 | 2 | VGDSLPAVDLFDSPANK       | 2d   | 28 |
| FBgn0038570 | 769.19  | 42 | 1 | ALDVTIDLPPPLGGVR        | 12d  | 28 |
| FBgn0038570 | 545.62  | 44 | 1 | LLADPAGGFTK             | 12d  | 28 |
| FBgn0038570 | 759.13  | 49 | 2 | THLPGYVSSADELK          | 12d  | 28 |
| FBgn0038570 | 938.15  | 74 | 2 | VGDSLPAVDLFDSPANK       | 12d  | 28 |
| FBgn0038570 | 768.52  | 99 | 2 | ALDVTIDLPPPLGGVR        | 22d  | 28 |
| FBgn0038570 | 759.1   | 60 | 3 | THLPGYVSSADELK          | 22d  | 28 |
| FBgn0038570 | 826.1   | 35 | 1 | VIIFGVPGAFTPGCSK        | 22d  | 28 |
| FBgn0038570 | 759.29  | 55 | 3 | THLPGYVSSADELK          | 32d  | 28 |
| FBgn0038570 | 938.01  | 75 | 3 | VGDSLPAVDLFDSPANK       | 32d  | 28 |
| FBgn0038570 | 768.94  | 38 | 1 | ALDVTIDLPPPLGGVR        | 36d  | 28 |
| FBgn0038570 | 759.21  | 53 | 3 | THLPGYVSSADELK          | 36d  | 28 |
| FBgn0038570 | 938.13  | 78 | 2 | VGDSLPAVDLFDSPANK       | 36d  | 28 |
| FBgn0038570 | 545.91  | 49 | 2 | LLADPAGGFTK             | 42d  | 28 |
| FBgn0038570 | 759.44  | 49 | 3 | THLPGYVSSADELK          | 42d  | 28 |
| FBgn0038570 | 937.99  | 52 | 3 | VGDSLPAVDLFDSPANK       | 42d  | 28 |
| FBgn0038570 | 825.99  | 43 | 1 | VIIFGVPGAFTPGCSK        | 42d  | 28 |
| FBgn0038570 | 545.84  | 41 | 1 | LLADPAGGFTK             | 46d  | 28 |
| FBgn0038570 | 759.19  | 61 | 3 | THLPGYVSSADELK          | 46d  | 28 |
| FBgn0038570 | 937.98  | 62 | 1 | VGDSLPAVDLFDSPANK       | 46d  | 28 |
| FBgn0038570 | 1194.85 | 83 | 3 | VTELNVEPDGTGLSCSLANNIGK | 46d  | 28 |



|             |         |    |   |                                         |     |    |
|-------------|---------|----|---|-----------------------------------------|-----|----|
| FBgn0038570 | 768.86  | 48 | 2 | ALDVTIDLPLGGVR                          | 50d | 28 |
| FBgn0038570 | 506.5   | 53 | 2 | THLPGYVSSADELK                          | 50d | 28 |
| FBgn0038570 | 759.33  | 57 | 2 | THLPGYVSSADELK                          | 52d | 28 |
| FBgn0038570 | 938.05  | 65 | 2 | VGDSLPAVDLFDSPANK                       | 52d | 28 |
| FBgn0038570 | 1194.96 | 59 | 1 | VTELNVEPDGTGLSCSLANNIGK                 | 52d | 28 |
| FBgn0038587 | 1341.57 | 73 | 1 | AFIGHALGVDPQTVQIPVIGGHSGVTILPVLSQSQPLFK | 2d  | 18 |
| FBgn0038587 | 1161.4  | 71 | 1 | ALVAIITNPVNTCVPIAAEILK                  | 2d  | 18 |
| FBgn0038587 | 660.56  | 74 | 3 | DDLFNVNAGIIK                            | 2d  | 18 |
| FBgn0038587 | 633.88  | 61 | 3 | GSDVVVIPAGVPR                           | 2d  | 18 |
| FBgn0038587 | 537.7   | 49 | 1 | IQEAGTEVVK                              | 2d  | 18 |
| FBgn0038587 | 603.9   | 43 | 3 | LFGVSTLDVVR                             | 2d  | 18 |
| FBgn0038587 | 549.43  | 59 | 2 | LLEAAIPELK                              | 2d  | 18 |
| FBgn0038587 | 1039.8  | 73 | 1 | QNPLVTDLALYDIVHTPGVAADLSHIDTK           | 2d  | 18 |
| FBgn0038587 | 747.63  | 71 | 1 | TAGFIGADQLGDSLK                         | 2d  | 18 |
| FBgn0038587 | 660.54  | 58 | 2 | DDLFNVNAGIIK                            | 22d | 18 |
| FBgn0038587 | 633.66  | 54 | 3 | GSDVVVIPAGVPR                           | 22d | 18 |
| FBgn0038587 | 549.19  | 56 | 2 | LLEAAIPELK                              | 22d | 18 |
| FBgn0038587 | 747.25  | 95 | 4 | TAGFIGADQLGDSLK                         | 22d | 18 |
| FBgn0038587 | 1341.5  | 69 | 1 | AFIGHALGVDPQTVQIPVIGGHSGVTILPVLSQSQPLFK | 42d | 18 |
| FBgn0038587 | 1161.21 | 44 | 2 | ALVAIITNPVNTCVPIAAEILK                  | 42d | 18 |
| FBgn0038587 | 660.47  | 75 | 3 | DDLFNVNAGIIK                            | 42d | 18 |
| FBgn0038587 | 633.66  | 38 | 2 | GSDVVVIPAGVPR                           | 42d | 18 |
| FBgn0038587 | 603.63  | 50 | 2 | LFGVSTLDVVR                             | 42d | 18 |
| FBgn0038587 | 549.2   | 54 | 3 | LLEAAIPELK                              | 42d | 18 |
| FBgn0038587 | 747.24  | 83 | 2 | TAGFIGADQLGDSLK                         | 42d | 18 |
| FBgn0038587 | 375.59  | 50 | 2 | AGVYDPK                                 | 62d | 18 |
| FBgn0038587 | 660.34  | 74 | 1 | DDLFNVNAGIIK                            | 62d | 18 |
| FBgn0038587 | 633.53  | 50 | 2 | GSDVVVIPAGVPR                           | 62d | 18 |
| FBgn0038587 | 537.66  | 56 | 3 | IQEAGTEVVK                              | 62d | 18 |
| FBgn0038587 | 613.48  | 62 | 1 | KLLEAAIPELK                             | 62d | 18 |
| FBgn0038587 | 549.47  | 50 | 1 | LLEAAIPELK                              | 62d | 18 |
| FBgn0038587 | 391.74  | 34 | 1 | LNDYEK                                  | 62d | 18 |

|             |         |    |   |                                         |      |    |
|-------------|---------|----|---|-----------------------------------------|------|----|
| FBgn0038587 | 585.54  | 35 | 1 | NGVQENLGLPK                             | 62d  | 18 |
| FBgn0038587 | 747.47  | 70 | 2 | TAGFIGADQLGDSLK                         | 62d  | 18 |
| FBgn0038587 | 1161.3  | 75 | 4 | ALVAIITNPVNTCVPIAAEILK                  | 82d  | 18 |
| FBgn0038587 | 660.5   | 60 | 2 | DDLFNVNAGIIK                            | 82d  | 18 |
| FBgn0038587 | 634.05  | 55 | 2 | GSDVVVIPAGVPR                           | 82d  | 18 |
| FBgn0038587 | 603.78  | 39 | 1 | LFGVSTLDVVR                             | 82d  | 18 |
| FBgn0038587 | 549.16  | 51 | 3 | LLEAAIPELK                              | 82d  | 18 |
| FBgn0038587 | 747.26  | 62 | 2 | TAGFIGADQLGDSLK                         | 82d  | 18 |
| FBgn0038587 | 1341.55 | 48 | 1 | AFIGHALGVDPQTVQIPVIGGHSGVTILPVLSQSQPLFK | 102d | 18 |
| FBgn0038587 | 1225.1  | 51 | 1 | ALVAIITNPVNTCVPIAAEILKK                 | 102d | 18 |
| FBgn0038587 | 660.3   | 63 | 1 | DDLFNVNAGIIK                            | 102d | 18 |
| FBgn0038587 | 633.73  | 46 | 2 | GSDVVVIPAGVPR                           | 102d | 18 |
| FBgn0038587 | 549.46  | 51 | 3 | LLEAAIPELK                              | 102d | 18 |
| FBgn0038587 | 747.63  | 88 | 5 | TAGFIGADQLGDSLK                         | 102d | 18 |
| FBgn0038587 | 1161.22 | 59 | 2 | ALVAIITNPVNTCVPIAAEILK                  | 112d | 18 |
| FBgn0038587 | 1225.23 | 43 | 1 | ALVAIITNPVNTCVPIAAEILKK                 | 112d | 18 |
| FBgn0038587 | 633.92  | 47 | 1 | GSDVVVIPAGVPR                           | 112d | 18 |
| FBgn0038587 | 603.87  | 52 | 4 | LFGVSTLDVVR                             | 112d | 18 |
| FBgn0038587 | 549.17  | 35 | 1 | LLEAAIPELK                              | 112d | 18 |
| FBgn0038587 | 747.49  | 73 | 4 | TAGFIGADQLGDSLK                         | 112d | 18 |
| FBgn0038587 | 1161.39 | 56 | 2 | ALVAIITNPVNTCVPIAAEILK                  | 122d | 18 |
| FBgn0038587 | 1225.31 | 53 | 1 | ALVAIITNPVNTCVPIAAEILKK                 | 122d | 18 |
| FBgn0038587 | 660.31  | 48 | 1 | DDLFNVNAGIIK                            | 122d | 18 |
| FBgn0038587 | 633.6   | 49 | 2 | GSDVVVIPAGVPR                           | 122d | 18 |
| FBgn0038587 | 603.95  | 58 | 3 | LFGVSTLDVVR                             | 122d | 18 |
| FBgn0038587 | 549.12  | 49 | 2 | LLEAAIPELK                              | 122d | 18 |
| FBgn0038587 | 746.84  | 76 | 3 | TAGFIGADQLGDSLK                         | 122d | 18 |
| FBgn0038587 | 1341.03 | 40 | 1 | AFIGHALGVDPQTVQIPVIGGHSGVTILPVLSQSQPLFK | 132d | 18 |
| FBgn0038587 | 660.34  | 58 | 1 | DDLFNVNAGIIK                            | 132d | 18 |
| FBgn0038587 | 634.09  | 58 | 2 | GSDVVVIPAGVPR                           | 132d | 18 |
| FBgn0038587 | 537.89  | 34 | 1 | IQEAGTEVVK                              | 132d | 18 |
| FBgn0038587 | 613.53  | 68 | 2 | KLLEAAIPELK                             | 132d | 18 |

|             |         |    |   |                                         |      |    |
|-------------|---------|----|---|-----------------------------------------|------|----|
| FBgn0038587 | 604.05  | 45 | 1 | LFGVSTLDVVR                             | 132d | 18 |
| FBgn0038587 | 548.9   | 42 | 1 | LLEAAIPELK                              | 132d | 18 |
| FBgn0038587 | 391.59  | 39 | 1 | LNDYEK                                  | 132d | 18 |
| FBgn0038587 | 747.62  | 82 | 1 | TAGFIGADQLGDSLK                         | 132d | 18 |
| FBgn0038587 | 1161.27 | 62 | 1 | ALVAIITNPVNTCVPIAAEILK                  | 142d | 18 |
| FBgn0038587 | 537.69  | 56 | 1 | IQEAGTEVVK                              | 142d | 18 |
| FBgn0038587 | 603.87  | 57 | 5 | LFGVSTLDVVR                             | 142d | 18 |
| FBgn0038587 | 548.14  | 54 | 3 | LLEAAIPELK                              | 142d | 18 |
| FBgn0038587 | 391.76  | 35 | 1 | LNDYEK                                  | 142d | 18 |
| FBgn0038587 | 747.32  | 76 | 3 | TAGFIGADQLGDSLK                         | 142d | 18 |
| FBgn0038587 | 1161.15 | 79 | 1 | ALVAIITNPVNTCVPIAAEILK                  | 2d   | 28 |
| FBgn0038587 | 660.52  | 46 | 2 | DDLFNVNAGIIK                            | 2d   | 28 |
| FBgn0038587 | 633.71  | 57 | 2 | GSDVVVIPAGVPR                           | 2d   | 28 |
| FBgn0038587 | 537.6   | 44 | 4 | IQEAGTEVVK                              | 2d   | 28 |
| FBgn0038587 | 613.38  | 79 | 2 | KLLEAAIPELK                             | 2d   | 28 |
| FBgn0038587 | 603.89  | 48 | 6 | LFGVSTLDVVR                             | 2d   | 28 |
| FBgn0038587 | 549.06  | 54 | 3 | LLEAAIPELK                              | 2d   | 28 |
| FBgn0038587 | 391.64  | 35 | 1 | LNDYEK                                  | 2d   | 28 |
| FBgn0038587 | 585.17  | 65 | 3 | NGVQENLGLPK                             | 2d   | 28 |
| FBgn0038587 | 1039.32 | 41 | 1 | QNPLVTDLALYDIVHTPGVAADLSHIDTK           | 2d   | 28 |
| FBgn0038587 | 747.28  | 83 | 3 | TAGFIGADQLGDSLK                         | 2d   | 28 |
| FBgn0038587 | 1341.57 | 68 | 1 | AFIGHALGVDPQTVQIPVIGGHSGVTILPVLSQSQPLFK | 12d  | 28 |
| FBgn0038587 | 375.53  | 40 | 2 | AGVYDPK                                 | 12d  | 28 |
| FBgn0038587 | 1161.21 | 64 | 4 | ALVAIITNPVNTCVPIAAEILK                  | 12d  | 28 |
| FBgn0038587 | 1225.21 | 68 | 1 | ALVAIITNPVNTCVPIAAEILKK                 | 12d  | 28 |
| FBgn0038587 | 660.57  | 66 | 3 | DDLFNVNAGIIK                            | 12d  | 28 |
| FBgn0038587 | 633.8   | 53 | 3 | GSDVVVIPAGVPR                           | 12d  | 28 |
| FBgn0038587 | 537.76  | 43 | 1 | IQEAGTEVVK                              | 12d  | 28 |
| FBgn0038587 | 603.65  | 61 | 6 | LFGVSTLDVVR                             | 12d  | 28 |
| FBgn0038587 | 549.47  | 54 | 3 | LLEAAIPELK                              | 12d  | 28 |
| FBgn0038587 | 747.29  | 90 | 3 | TAGFIGADQLGDSLK                         | 12d  | 28 |
| FBgn0038587 | 660.22  | 73 | 3 | DDLFNVNAGIIK                            | 22d  | 28 |

|             |         |    |   |                                         |     |    |
|-------------|---------|----|---|-----------------------------------------|-----|----|
| FBgn0038587 | 633.62  | 58 | 3 | GSDVVVIPAGVPR                           | 22d | 28 |
| FBgn0038587 | 613.16  | 63 | 2 | KLLEAAIPELK                             | 22d | 28 |
| FBgn0038587 | 747.46  | 79 | 2 | TAGFIGADQLGDSLK                         | 22d | 28 |
| FBgn0038587 | 1341.58 | 56 | 2 | AFIGHALGVDPQTVQIPVIGGHSGVTILPVLSQSQPLFK | 32d | 28 |
| FBgn0038587 | 375.77  | 40 | 1 | AGVYDPK                                 | 32d | 28 |
| FBgn0038587 | 660.22  | 59 | 3 | DDLFNVNAGIIK                            | 32d | 28 |
| FBgn0038587 | 634     | 60 | 2 | GSDVVVIPAGVPR                           | 32d | 28 |
| FBgn0038587 | 537.86  | 47 | 3 | IQEAGTEVVK                              | 32d | 28 |
| FBgn0038587 | 613.55  | 37 | 1 | KLLEAAIPELK                             | 32d | 28 |
| FBgn0038587 | 549.38  | 56 | 3 | LLEAAIPELK                              | 32d | 28 |
| FBgn0038587 | 747.44  | 77 | 2 | TAGFIGADQLGDSLK                         | 32d | 28 |
| FBgn0038587 | 1161.06 | 72 | 3 | ALVAIITNPVNTCVPIAAEILK                  | 36d | 28 |
| FBgn0038587 | 660.41  | 60 | 2 | DDLFNVNAGIIK                            | 36d | 28 |
| FBgn0038587 | 633.75  | 45 | 2 | GSDVVVIPAGVPR                           | 36d | 28 |
| FBgn0038587 | 613.11  | 70 | 2 | KLLEAAIPELK                             | 36d | 28 |
| FBgn0038587 | 603.59  | 39 | 1 | LFGVSTLDVVR                             | 36d | 28 |
| FBgn0038587 | 549.1   | 60 | 3 | LLEAAIPELK                              | 36d | 28 |
| FBgn0038587 | 585.51  | 34 | 1 | NGVQENLGLPK                             | 36d | 28 |
| FBgn0038587 | 1039.89 | 66 | 2 | QNPLVTDLALYDIVHTPGVAADLSHIDTK           | 36d | 28 |
| FBgn0038587 | 747.35  | 75 | 4 | TAGFIGADQLGDSLK                         | 36d | 28 |
| FBgn0038587 | 1341.48 | 39 | 1 | AFIGHALGVDPQTVQIPVIGGHSGVTILPVLSQSQPLFK | 42d | 28 |
| FBgn0038587 | 1161.36 | 63 | 3 | ALVAIITNPVNTCVPIAAEILK                  | 42d | 28 |
| FBgn0038587 | 660.23  | 64 | 2 | DDLFNVNAGIIK                            | 42d | 28 |
| FBgn0038587 | 633.43  | 52 | 1 | GSDVVVIPAGVPR                           | 42d | 28 |
| FBgn0038587 | 537.58  | 53 | 3 | IQEAGTEVVK                              | 42d | 28 |
| FBgn0038587 | 603.76  | 52 | 2 | LFGVSTLDVVR                             | 42d | 28 |
| FBgn0038587 | 549.09  | 60 | 3 | LLEAAIPELK                              | 42d | 28 |
| FBgn0038587 | 585.22  | 43 | 1 | NGVQENLGLPK                             | 42d | 28 |
| FBgn0038587 | 747.21  | 81 | 3 | TAGFIGADQLGDSLK                         | 42d | 28 |
| FBgn0038587 | 774.58  | 45 | 1 | ALVAIITNPVNTCVPIAAEILK                  | 46d | 28 |
| FBgn0038587 | 660.22  | 60 | 2 | DDLFNVNAGIIK                            | 46d | 28 |
| FBgn0038587 | 633.92  | 66 | 3 | GSDVVVIPAGVPR                           | 46d | 28 |

|             |         |    |   |                                         |     |    |
|-------------|---------|----|---|-----------------------------------------|-----|----|
| FBgn0038587 | 613.15  | 61 | 1 | KLLEAAIPELK                             | 46d | 28 |
| FBgn0038587 | 604.05  | 52 | 2 | LFGVSTLDVVR                             | 46d | 28 |
| FBgn0038587 | 549.07  | 54 | 3 | LLEAAIPELK                              | 46d | 28 |
| FBgn0038587 | 1039.65 | 73 | 1 | QNPLVTDLALYDIVHTPGVAADLSHIDTK           | 46d | 28 |
| FBgn0038587 | 747.63  | 77 | 1 | TAGFIGADQLGDSLK                         | 46d | 28 |
| FBgn0038587 | 1341.52 | 81 | 1 | AFIGHALGVDPQTVQIPVIGGHSGVTILPVLSQSQPLFK | 50d | 28 |
| FBgn0038587 | 660.14  | 68 | 3 | DDLFNVNAGIIK                            | 50d | 28 |
| FBgn0038587 | 633.84  | 54 | 1 | GSDVVVIPAGVPR                           | 50d | 28 |
| FBgn0038587 | 549.39  | 59 | 2 | LLEAAIPELK                              | 50d | 28 |
| FBgn0038587 | 585.48  | 68 | 1 | NGVQENLGLPK                             | 50d | 28 |
| FBgn0038587 | 1040.03 | 34 | 1 | QNPLVTDLALYDIVHTPGVAADLSHIDTK           | 50d | 28 |
| FBgn0038587 | 747.44  | 71 | 4 | TAGFIGADQLGDSLK                         | 50d | 28 |
| FBgn0038587 | 1341.42 | 37 | 1 | AFIGHALGVDPQTVQIPVIGGHSGVTILPVLSQSQPLFK | 52d | 28 |
| FBgn0038587 | 1161.27 | 65 | 2 | ALVAIITNPVNTCVPIAAEILK                  | 52d | 28 |
| FBgn0038587 | 660.27  | 60 | 3 | DDLFNVNAGIIK                            | 52d | 28 |
| FBgn0038587 | 603.84  | 49 | 2 | LFGVSTLDVVR                             | 52d | 28 |
| FBgn0038587 | 549.21  | 52 | 2 | LLEAAIPELK                              | 52d | 28 |
| FBgn0038587 | 747.38  | 81 | 2 | TAGFIGADQLGDSLK                         | 52d | 28 |
| FBgn0038587 | 1161.16 | 63 | 4 | ALVAIITNPVNTCVPIAAEILK                  | 56d | 28 |
| FBgn0038587 | 1225.03 | 49 | 2 | ALVAIITNPVNTCVPIAAEILKK                 | 56d | 28 |
| FBgn0038587 | 660.39  | 58 | 3 | DDLFNVNAGIIK                            | 56d | 28 |
| FBgn0038587 | 633.92  | 62 | 3 | GSDVVVIPAGVPR                           | 56d | 28 |
| FBgn0038587 | 603.31  | 59 | 2 | LFGVSTLDVVR                             | 56d | 28 |
| FBgn0038587 | 549.54  | 50 | 5 | LLEAAIPELK                              | 56d | 28 |
| FBgn0038587 | 747.59  | 88 | 3 | TAGFIGADQLGDSLK                         | 56d | 28 |
| FBgn0038659 | 1133.81 | 44 | 1 | KLGEDNSVFAQALVEFGEALK                   | 2d  | 18 |
| FBgn0038659 | 1069.69 | 45 | 1 | LGEDNSVFAQALVEFGEALK                    | 2d  | 18 |
| FBgn0038659 | 1155.36 | 82 | 1 | TLLDLNLDGGGGGLNEDGTPSHISSASPLPSPMR      | 22d | 18 |
| FBgn0038659 | 740.5   | 49 | 2 | VDDNWFEGAVNGR                           | 22d | 18 |
| FBgn0038659 | 713.43  | 53 | 2 | LGEDNSVFAQALVEFGEALK                    | 42d | 18 |
| FBgn0038659 | 740.43  | 96 | 1 | VDDNWFEGAVNGR                           | 42d | 18 |
| FBgn0038659 | 1069.49 | 56 | 1 | LGEDNSVFAQALVEFGEALK                    | 62d | 18 |

|             |         |     |   |                                    |      |    |
|-------------|---------|-----|---|------------------------------------|------|----|
| FBgn0038659 | 740.39  | 53  | 2 | VDDNWFEGAVNGR                      | 102d | 18 |
| FBgn0038659 | 740.5   | 58  | 2 | VDDNWFEGAVNGR                      | 112d | 18 |
| FBgn0038659 | 1069.44 | 82  | 2 | LGEDNSVFAQALVEFGEALK               | 122d | 18 |
| FBgn0038659 | 740.22  | 40  | 3 | VDDNWFEGAVNGR                      | 122d | 18 |
| FBgn0038659 | 1069.42 | 64  | 1 | LGEDNSVFAQALVEFGEALK               | 132d | 18 |
| FBgn0038659 | 1069.49 | 101 | 2 | LGEDNSVFAQALVEFGEALK               | 142d | 18 |
| FBgn0038659 | 740.57  | 52  | 2 | VDDNWFEGAVNGR                      | 142d | 18 |
| FBgn0038659 | 740.57  | 51  | 2 | VDDNWFEGAVNGR                      | 12d  | 28 |
| FBgn0038659 | 1069.49 | 71  | 2 | LGEDNSVFAQALVEFGEALK               | 36d  | 28 |
| FBgn0038659 | 1069.74 | 100 | 1 | LGEDNSVFAQALVEFGEALK               | 42d  | 28 |
| FBgn0038659 | 1155.37 | 65  | 1 | TLLDLNLDGGGGGLNEDGTPSHISSASPLPSPMR | 42d  | 28 |
| FBgn0038659 | 1069.41 | 76  | 2 | LGEDNSVFAQALVEFGEALK               | 50d  | 28 |
| FBgn0038659 | 1155.35 | 67  | 1 | TLLDLNLDGGGGGLNEDGTPSHISSASPLPSPMR | 50d  | 28 |
| FBgn0038659 | 1069.78 | 84  | 2 | LGEDNSVFAQALVEFGEALK               | 52d  | 28 |
| FBgn0038659 | 1069.79 | 48  | 3 | LGEDNSVFAQALVEFGEALK               | 56d  | 28 |
| FBgn0038659 | 1155.3  | 35  | 1 | TLLDLNLDGGGGGLNEDGTPSHISSASPLPSPMR | 56d  | 28 |
| FBgn0038681 | 974.52  | 36  | 1 | DPDTLEAPDDFIDTINR                  | 62d  | 18 |
| FBgn0038681 | 974.56  | 83  | 1 | DPDTLEAPDDFIDTINR                  | 82d  | 18 |
| FBgn0038681 | 974.53  | 39  | 1 | DPDTLEAPDDFIDTINR                  | 102d | 18 |
| FBgn0038681 | 974.26  | 35  | 1 | DPDTLEAPDDFIDTINR                  | 112d | 18 |
| FBgn0038681 | 974.32  | 57  | 1 | DPDTLEAPDDFIDTINR                  | 56d  | 28 |
| FBgn0038742 | 790.72  | 51  | 1 | IGIAGQALGIGQAALELAVDYAQK           | 42d  | 18 |
| FBgn0038742 | 791.2   | 80  | 2 | IGIAGQALGIGQAALELAVDYAQK           | 62d  | 18 |
| FBgn0038742 | 791.11  | 65  | 2 | IGIAGQALGIGQAALELAVDYAQK           | 82d  | 18 |
| FBgn0038742 | 790.96  | 50  | 1 | IGIAGQALGIGQAALELAVDYAQK           | 112d | 18 |
| FBgn0038742 | 790.84  | 65  | 2 | IGIAGQALGIGQAALELAVDYAQK           | 42d  | 28 |
| FBgn0038764 | 829.27  | 36  | 1 | AQQAVALQLYKAQPK                    | 62d  | 18 |
| FBgn0038764 | 828.77  | 36  | 2 | AQQAVALQLYKAQPK                    | 102d | 18 |
| FBgn0038764 | 829.56  | 39  | 2 | AQQAVALQLYKAQPK                    | 112d | 18 |
| FBgn0038764 | 829.68  | 36  | 1 | AQQAVALQLYKAQPK                    | 122d | 18 |
| FBgn0038764 | 829.56  | 39  | 2 | AQQAVALQLYKAQPK                    | 132d | 18 |
| FBgn0038764 | 829.49  | 40  | 3 | AQQAVALQLYKAQPK                    | 142d | 18 |

|             |         |    |   |                            |      |    |
|-------------|---------|----|---|----------------------------|------|----|
| FBgn0038764 | 828.79  | 34 | 1 | AQQAVALQLYKAQPK            | 12d  | 28 |
| FBgn0038764 | 829.3   | 40 | 4 | AQQAVALQLYKAQPK            | 56d  | 28 |
| FBgn0038774 | 1022.6  | 57 | 1 | YGVPEEEIFQTADLFR           | 82d  | 18 |
| FBgn0038810 | 467.08  | 35 | 1 | AAKKTANTK                  | 36d  | 28 |
| FBgn0038826 | 919.97  | 43 | 1 | EFPVDGALNVLGQFLESNLEHVSNK  | 2d   | 18 |
| FBgn0038826 | 919.73  | 55 | 3 | EFPVDGALNVLGQFLESNLEHVSNK  | 42d  | 18 |
| FBgn0038826 | 919.84  | 41 | 1 | EFPVDGALNVLGQFLESNLEHVSNK  | 2d   | 28 |
| FBgn0038839 | 846.49  | 95 | 2 | MAGSCGSGTAGSAAEPKPGVDTEENR | 2d   | 18 |
| FBgn0038839 | 647.18  | 56 | 1 | STLLAELFGEGR               | 42d  | 18 |
| FBgn0038839 | 647.42  | 78 | 1 | STLLAELFGEGR               | 62d  | 18 |
| FBgn0038839 | 646.97  | 70 | 1 | STLLAELFGEGR               | 82d  | 18 |
| FBgn0038839 | 846.41  | 66 | 1 | MAGSCGSGTAGSAAEPKPGVDTEENR | 102d | 18 |
| FBgn0038839 | 646.83  | 82 | 3 | STLLAELFGEGR               | 112d | 18 |
| FBgn0038839 | 846.54  | 45 | 1 | MAGSCGSGTAGSAAEPKPGVDTEENR | 122d | 18 |
| FBgn0038839 | 646.98  | 64 | 1 | STLLAELFGEGR               | 122d | 18 |
| FBgn0038839 | 846.47  | 34 | 1 | MAGSCGSGTAGSAAEPKPGVDTEENR | 132d | 18 |
| FBgn0038839 | 647.43  | 62 | 1 | STLLAELFGEGR               | 132d | 18 |
| FBgn0038839 | 647.51  | 85 | 2 | STLLAELFGEGR               | 142d | 18 |
| FBgn0038839 | 846.44  | 38 | 1 | MAGSCGSGTAGSAAEPKPGVDTEENR | 2d   | 28 |
| FBgn0038839 | 846.4   | 72 | 1 | MAGSCGSGTAGSAAEPKPGVDTEENR | 52d  | 28 |
| FBgn0038839 | 647.04  | 91 | 2 | STLLAELFGEGR               | 56d  | 28 |
| FBgn0038858 | 884.07  | 50 | 1 | GFDTSTPVSQFIPIEK           | 46d  | 28 |
| FBgn0038922 | 713.93  | 66 | 2 | DLGGQSTTQDFTR              | 2d   | 18 |
| FBgn0038922 | 970.14  | 57 | 2 | HINLPTYGEIIQNAINK          | 2d   | 18 |
| FBgn0038922 | 764.89  | 83 | 3 | NLDLYANVVHVR               | 2d   | 18 |
| FBgn0038922 | 713.7   | 57 | 2 | DLGGQSTTQDFTR              | 22d  | 18 |
| FBgn0038922 | 969.99  | 39 | 1 | HINLPTYGEIIQNAINK          | 22d  | 18 |
| FBgn0038922 | 764.59  | 53 | 1 | NLDLYANVVHVR               | 42d  | 18 |
| FBgn0038922 | 764.96  | 48 | 1 | NLDLYANVVHVR               | 62d  | 18 |
| FBgn0038922 | 1303.01 | 71 | 1 | EQTEGEYSALEHESVPGIVECLK    | 102d | 18 |
| FBgn0038922 | 970.24  | 71 | 1 | HINLPTYGEIIQNAINK          | 102d | 18 |
| FBgn0038922 | 1279.11 | 51 | 1 | AASVPVDFECYFLSEINPVLSAK    | 112d | 18 |

|             |         |    |   |                                 |      |    |
|-------------|---------|----|---|---------------------------------|------|----|
| FBgn0038922 | 1303.32 | 76 | 1 | EQTEGEYSALEHESVPGIVECLK         | 112d | 18 |
| FBgn0038922 | 1303.08 | 66 | 2 | EQTEGEYSALEHESVPGIVECLK         | 122d | 18 |
| FBgn0038922 | 446.31  | 63 | 2 | LGDGLFLR                        | 122d | 18 |
| FBgn0038922 | 714.05  | 76 | 2 | DLGGQSTTQDFTR                   | 132d | 18 |
| FBgn0038922 | 1303.28 | 74 | 1 | EQTEGEYSALEHESVPGIVECLK         | 132d | 18 |
| FBgn0038922 | 970.15  | 81 | 2 | HINLPTYGEIIQNAINK               | 142d | 18 |
| FBgn0038922 | 713.83  | 78 | 3 | DLGGQSTTQDFTR                   | 2d   | 28 |
| FBgn0038922 | 970.01  | 49 | 2 | HINLPTYGEIIQNAINK               | 2d   | 28 |
| FBgn0038922 | 764.74  | 70 | 3 | NLDLYANVVHVR                    | 2d   | 28 |
| FBgn0038922 | 713.68  | 74 | 2 | DLGGQSTTQDFTR                   | 12d  | 28 |
| FBgn0038922 | 970.18  | 50 | 1 | HINLPTYGEIIQNAINK               | 12d  | 28 |
| FBgn0038922 | 764.88  | 71 | 1 | NLDLYANVVHVR                    | 12d  | 28 |
| FBgn0038922 | 1303.17 | 66 | 2 | EQTEGEYSALEHESVPGIVECLK         | 22d  | 28 |
| FBgn0038922 | 713.64  | 72 | 1 | DLGGQSTTQDFTR                   | 36d  | 28 |
| FBgn0038922 | 647.13  | 57 | 1 | HINLPTYGEIIQNAINK               | 36d  | 28 |
| FBgn0038922 | 970.02  | 37 | 1 | HINLPTYGEIIQNAINK               | 42d  | 28 |
| FBgn0038922 | 764.94  | 67 | 3 | NLDLYANVVHVR                    | 42d  | 28 |
| FBgn0038922 | 969.75  | 64 | 1 | HINLPTYGEIIQNAINK               | 46d  | 28 |
| FBgn0038922 | 764.92  | 71 | 1 | NLDLYANVVHVR                    | 46d  | 28 |
| FBgn0038922 | 713.73  | 98 | 2 | DLGGQSTTQDFTR                   | 50d  | 28 |
| FBgn0038922 | 1303.05 | 62 | 1 | EQTEGEYSALEHESVPGIVECLK         | 52d  | 28 |
| FBgn0038924 | 1105.83 | 59 | 1 | TPPEFLQPGDVVQSEIVGLGK           | 82d  | 18 |
| FBgn0038924 | 831.25  | 35 | 1 | SLVEFAGLEGVPSDLK                | 42d  | 28 |
| FBgn0038946 | 879.16  | 41 | 1 | IPEVPVPLFSVYPATK                | 22d  | 18 |
| FBgn0038946 | 879.59  | 68 | 1 | IPEVPVPLFSVYPATK                | 42d  | 18 |
| FBgn0038946 | 879.21  | 40 | 1 | IPEVPVPLFSVYPATK                | 62d  | 18 |
| FBgn0038946 | 879.71  | 39 | 1 | IPEVPVPLFSVYPATK                | 102d | 18 |
| FBgn0038946 | 879.36  | 47 | 2 | IPEVPVPLFSVYPATK                | 122d | 18 |
| FBgn0038946 | 879.24  | 69 | 2 | IPEVPVPLFSVYPATK                | 2d   | 28 |
| FBgn0038946 | 957.03  | 38 | 1 | VAVVTGASVGIGATTAIELANAGMVVVGLAR | 2d   | 28 |
| FBgn0038946 | 879.41  | 60 | 2 | IPEVPVPLFSVYPATK                | 12d  | 28 |
| FBgn0038946 | 879.32  | 68 | 1 | IPEVPVPLFSVYPATK                | 32d  | 28 |



|             |         |     |   |                              |      |    |
|-------------|---------|-----|---|------------------------------|------|----|
| FBgn0038946 | 879.58  | 41  | 1 | IPEVPVPLFSVYPATK             | 36d  | 28 |
| FBgn0038946 | 879.26  | 50  | 1 | IPEVPVPLFSVYPATK             | 42d  | 28 |
| FBgn0038946 | 879.64  | 41  | 1 | IPEVPVPLFSVYPATK             | 46d  | 28 |
| FBgn0038946 | 879.61  | 38  | 1 | IPEVPVPLFSVYPATK             | 50d  | 28 |
| FBgn0039094 | 1082.3  | 108 | 2 | QVGVLAAGLVALDEVVPLLSK        | 42d  | 18 |
| FBgn0039094 | 1226.55 | 59  | 2 | MATAVVGDDVYGEDPTVNELEAR      | 102d | 18 |
| FBgn0039094 | 1226.6  | 44  | 1 | MATAVVGDDVYGEDPTVNELEAR      | 122d | 18 |
| FBgn0039094 | 1226.54 | 55  | 1 | MATAVVGDDVYGEDPTVNELEAR      | 142d | 18 |
| FBgn0039110 | 1447.18 | 45  | 1 | VIVQPDSSADVPVPPVEEGDEDAEAEAK | 52d  | 28 |
| FBgn0039114 | 1544.51 | 44  | 3 | YLVPIQTDQDQTDGQPQEDDNEAVPDER | 2d   | 18 |
| FBgn0039114 | 1544.73 | 79  | 2 | YLVPIQTDQDQTDGQPQEDDNEAVPDER | 62d  | 18 |
| FBgn0039114 | 1544.55 | 56  | 3 | YLVPIQTDQDQTDGQPQEDDNEAVPDER | 82d  | 18 |
| FBgn0039114 | 1544.39 | 55  | 2 | YLVPIQTDQDQTDGQPQEDDNEAVPDER | 102d | 18 |
| FBgn0039114 | 1544.68 | 51  | 2 | YLVPIQTDQDQTDGQPQEDDNEAVPDER | 112d | 18 |
| FBgn0039114 | 1544.64 | 48  | 1 | YLVPIQTDQDQTDGQPQEDDNEAVPDER | 122d | 18 |
| FBgn0039114 | 1544.55 | 41  | 1 | YLVPIQTDQDQTDGQPQEDDNEAVPDER | 132d | 18 |
| FBgn0039114 | 1544.74 | 46  | 1 | YLVPIQTDQDQTDGQPQEDDNEAVPDER | 12d  | 28 |
| FBgn0039145 | 1470.79 | 56  | 1 | ETGQIPASINIPLGVVSQELAASEQLFK | 62d  | 18 |
| FBgn0039145 | 763.21  | 39  | 1 | NYQGSWLDWAER                 | 82d  | 18 |
| FBgn0039145 | 980.7   | 40  | 1 | ETGQIPASINIPLGVVSQELAASEQLFK | 102d | 18 |
| FBgn0039145 | 1470.68 | 63  | 2 | ETGQIPASINIPLGVVSQELAASEQLFK | 12d  | 28 |
| FBgn0039145 | 1471.02 | 51  | 1 | ETGQIPASINIPLGVVSQELAASEQLFK | 36d  | 28 |
| FBgn0039145 | 1470.51 | 43  | 1 | ETGQIPASINIPLGVVSQELAASEQLFK | 50d  | 28 |
| FBgn0039145 | 1470.65 | 72  | 4 | ETGQIPASINIPLGVVSQELAASEQLFK | 52d  | 28 |
| FBgn0039182 | 732.24  | 41  | 1 | TTIEETSAQKKVK                | 132d | 18 |
| FBgn0039183 | 562.73  | 42  | 3 | KNALQVLIPK                   | 22d  | 28 |
| FBgn0039183 | 562.72  | 44  | 1 | KNALQVLIPK                   | 36d  | 28 |
| FBgn0039183 | 562.97  | 45  | 2 | KNALQVLIPK                   | 42d  | 28 |
| FBgn0039241 | 1059.57 | 41  | 1 | EVSDGIIAAGYEPEALEILK         | 102d | 18 |
| FBgn0039241 | 1059.72 | 46  | 1 | EVSDGIIAAGYEPEALEILK         | 142d | 18 |
| FBgn0039241 | 1059.6  | 65  | 1 | EVSDGIIAAGYEPEALEILK         | 2d   | 28 |
| FBgn0039241 | 892.92  | 73  | 2 | HVSPAGAAVGVPLNPAQAK          | 2d   | 28 |

|             |         |     |   |                           |      |    |
|-------------|---------|-----|---|---------------------------|------|----|
| FBgn0039241 | 857.1   | 68  | 2 | QLSGVALGSDAFFPFR          | 2d   | 28 |
| FBgn0039241 | 856.99  | 54  | 1 | QLSGVALGSDAFFPFR          | 36d  | 28 |
| FBgn0039241 | 1059.69 | 47  | 1 | EVSDGIIAAGYEPEALEILK      | 56d  | 28 |
| FBgn0039321 | 1034.24 | 36  | 1 | TMLEADSGADVIDGMGLFPK      | 42d  | 28 |
| FBgn0039349 | 717.33  | 48  | 1 | ALVDGAWVDSSNAK            | 22d  | 18 |
| FBgn0039349 | 928.61  | 52  | 1 | LIEQHSQEIAEIMTAESGKPINESK | 42d  | 18 |
| FBgn0039349 | 588.25  | 52  | 1 | HGIDDYVDIK                | 102d | 18 |
| FBgn0039349 | 946.82  | 36  | 1 | GLAGYFYSENLQQVFR          | 112d | 18 |
| FBgn0039349 | 947.18  | 48  | 1 | GLAGYFYSENLQQVFR          | 122d | 18 |
| FBgn0039349 | 1251.33 | 57  | 1 | RLEVGMVGVNEGIISAAEAPFGGVK | 122d | 18 |
| FBgn0039349 | 717.47  | 44  | 2 | ALVDGAWVDSSNAK            | 132d | 18 |
| FBgn0039349 | 702.23  | 38  | 1 | IYGEIVPSASPNR             | 2d   | 28 |
| FBgn0039349 | 702.49  | 47  | 3 | IYGEIVPSASPNR             | 12d  | 28 |
| FBgn0039349 | 668.68  | 36  | 1 | ANIILGGQPLPDK             | 32d  | 28 |
| FBgn0039349 | 588.29  | 41  | 1 | HGIDDYVDIK                | 32d  | 28 |
| FBgn0039349 | 717.52  | 48  | 1 | ALVDGAWVDSSNAK            | 36d  | 28 |
| FBgn0039349 | 588.31  | 62  | 2 | HGIDDYVDIK                | 36d  | 28 |
| FBgn0039349 | 624.7   | 62  | 3 | FFVQDSVYDK                | 42d  | 28 |
| FBgn0039349 | 588.29  | 60  | 1 | HGIDDYVDIK                | 46d  | 28 |
| FBgn0039349 | 928.57  | 41  | 1 | LIEQHSQEIAEIMTAESGKPINESK | 46d  | 28 |
| FBgn0039349 | 669.02  | 45  | 2 | ANIILGGQPLPDK             | 52d  | 28 |
| FBgn0039349 | 624.72  | 43  | 1 | FFVQDSVYDK                | 52d  | 28 |
| FBgn0039358 | 762.2   | 36  | 1 | EHANVIQEAVYQTIVNDAIR      | 2d   | 18 |
| FBgn0039358 | 821.11  | 55  | 2 | NYGDHYAIFEPGTR            | 2d   | 18 |
| FBgn0039358 | 980.92  | 141 | 2 | TPDIGGTSSTDVVENILK        | 2d   | 18 |
| FBgn0039358 | 762.12  | 60  | 2 | EHANVIQEAVYQTIVNDAIR      | 22d  | 18 |
| FBgn0039358 | 820.64  | 59  | 3 | NYGDHYAIFEPGTR            | 22d  | 18 |
| FBgn0039358 | 980.56  | 127 | 3 | TPDIGGTSSTDVVENILK        | 22d  | 18 |
| FBgn0039358 | 820.99  | 64  | 1 | NYGDHYAIFEPGTR            | 42d  | 18 |
| FBgn0039358 | 981.03  | 127 | 3 | TPDIGGTSSTDVVENILK        | 42d  | 18 |
| FBgn0039358 | 762.13  | 47  | 1 | EHANVIQEAVYQTIVNDAIR      | 62d  | 18 |
| FBgn0039358 | 820.9   | 66  | 3 | NYGDHYAIFEPGTR            | 62d  | 18 |

|             |         |     |   |                        |      |    |
|-------------|---------|-----|---|------------------------|------|----|
| FBgn0039358 | 980.7   | 99  | 1 | TPDIGGTSSTDVVENILK     | 62d  | 18 |
| FBgn0039358 | 820.82  | 52  | 3 | NYGDHYAIFEPGTR         | 82d  | 18 |
| FBgn0039358 | 980.58  | 112 | 2 | TPDIGGTSSTDVVENILK     | 82d  | 18 |
| FBgn0039358 | 980.59  | 89  | 2 | TPDIGGTSSTDVVENILK     | 112d | 18 |
| FBgn0039358 | 1142.8  | 52  | 1 | EHANVIQEAVYQTIVNDAIR   | 122d | 18 |
| FBgn0039358 | 820.92  | 39  | 1 | NYGDHYAIFEPGTR         | 122d | 18 |
| FBgn0039358 | 981.22  | 96  | 1 | TPDIGGTSSTDVVENILK     | 122d | 18 |
| FBgn0039358 | 1142.77 | 77  | 1 | EHANVIQEAVYQTIVNDAIR   | 132d | 18 |
| FBgn0039358 | 1142.74 | 72  | 2 | EHANVIQEAVYQTIVNDAIR   | 142d | 18 |
| FBgn0039358 | 980.96  | 107 | 2 | TPDIGGTSSTDVVENILK     | 142d | 18 |
| FBgn0039358 | 1142    | 63  | 3 | EHANVIQEAVYQTIVNDAIR   | 2d   | 28 |
| FBgn0039358 | 820.73  | 45  | 3 | NYGDHYAIFEPGTR         | 2d   | 28 |
| FBgn0039358 | 762.17  | 55  | 1 | EHANVIQEAVYQTIVNDAIR   | 12d  | 28 |
| FBgn0039358 | 981.23  | 113 | 3 | TPDIGGTSSTDVVENILK     | 12d  | 28 |
| FBgn0039358 | 547.69  | 42  | 2 | NYGDHYAIFEPGTR         | 22d  | 28 |
| FBgn0039358 | 980.72  | 105 | 1 | TPDIGGTSSTDVVENILK     | 22d  | 28 |
| FBgn0039358 | 762.02  | 40  | 1 | EHANVIQEAVYQTIVNDAIR   | 32d  | 28 |
| FBgn0039358 | 820.76  | 61  | 3 | NYGDHYAIFEPGTR         | 32d  | 28 |
| FBgn0039358 | 981.15  | 141 | 3 | TPDIGGTSSTDVVENILK     | 32d  | 28 |
| FBgn0039358 | 762.02  | 65  | 5 | EHANVIQEAVYQTIVNDAIR   | 36d  | 28 |
| FBgn0039358 | 547.69  | 46  | 1 | NYGDHYAIFEPGTR         | 36d  | 28 |
| FBgn0039358 | 981.18  | 111 | 1 | TPDIGGTSSTDVVENILK     | 36d  | 28 |
| FBgn0039358 | 1142.64 | 45  | 1 | EHANVIQEAVYQTIVNDAIR   | 42d  | 28 |
| FBgn0039358 | 783.19  | 43  | 1 | NIANPVAMISASIDMLNHLGHK | 42d  | 28 |
| FBgn0039358 | 821.11  | 59  | 2 | NYGDHYAIFEPGTR         | 42d  | 28 |
| FBgn0039358 | 980.91  | 118 | 1 | TPDIGGTSSTDVVENILK     | 42d  | 28 |
| FBgn0039358 | 762.11  | 63  | 1 | EHANVIQEAVYQTIVNDAIR   | 46d  | 28 |
| FBgn0039358 | 547.5   | 35  | 1 | NYGDHYAIFEPGTR         | 46d  | 28 |
| FBgn0039358 | 980.92  | 127 | 2 | TPDIGGTSSTDVVENILK     | 46d  | 28 |
| FBgn0039358 | 762.19  | 34  | 1 | EHANVIQEAVYQTIVNDAIR   | 50d  | 28 |
| FBgn0039358 | 1173.96 | 49  | 2 | NIANPVAMISASIDMLNHLGHK | 50d  | 28 |
| FBgn0039358 | 820.88  | 67  | 1 | NYGDHYAIFEPGTR         | 50d  | 28 |

|             |         |     |   |                                        |      |    |
|-------------|---------|-----|---|----------------------------------------|------|----|
| FBgn0039358 | 981.07  | 125 | 1 | TPDIGGTNSSTDVVENILK                    | 52d  | 28 |
| FBgn0039358 | 1142.53 | 70  | 1 | EHANVIQEAVYQTIVNDAIR                   | 56d  | 28 |
| FBgn0039358 | 980.78  | 102 | 3 | TPDIGGTNSSTDVVENILK                    | 56d  | 28 |
| FBgn0039464 | 585.25  | 54  | 2 | LVQQESQAHE                             | 2d   | 18 |
| FBgn0039464 | 797.04  | 39  | 1 | SLASPDDPYDTIIGK                        | 82d  | 18 |
| FBgn0039464 | 585.41  | 35  | 1 | LVQQESQAHE                             | 102d | 18 |
| FBgn0039464 | 796.99  | 38  | 1 | SLASPDDPYDTIIGK                        | 102d | 18 |
| FBgn0039464 | 797.04  | 36  | 1 | SLASPDDPYDTIIGK                        | 112d | 18 |
| FBgn0039464 | 585.19  | 39  | 1 | LVQQESQAHE                             | 122d | 18 |
| FBgn0039464 | 585.24  | 47  | 2 | LVQQESQAHE                             | 2d   | 28 |
| FBgn0039464 | 797.12  | 59  | 1 | SLASPDDPYDTIIGK                        | 12d  | 28 |
| FBgn0039464 | 796.81  | 55  | 2 | SLASPDDPYDTIIGK                        | 32d  | 28 |
| FBgn0039464 | 796.92  | 64  | 3 | SLASPDDPYDTIIGK                        | 42d  | 28 |
| FBgn0039464 | 796.84  | 61  | 3 | SLASPDDPYDTIIGK                        | 46d  | 28 |
| FBgn0039466 | 580.46  | 38  | 1 | FTKKSHADVK                             | 122d | 18 |
| FBgn0039466 | 581.52  | 34  | 1 | FTKKSHADVK                             | 32d  | 28 |
| FBgn0039480 | 1049.22 | 134 | 2 | HNEDGSYTYGYEGADGSFK                    | 2d   | 18 |
| FBgn0039481 | 903.94  | 103 | 1 | HNDDGSYTYGYEAADK                       | 2d   | 18 |
| FBgn0039490 | 871.64  | 37  | 1 | KQLLQQNVAASEQER                        | 22d  | 28 |
| FBgn0039501 | 630.64  | 37  | 1 | LSAINNWMRR                             | 42d  | 28 |
| FBgn0039537 | 1049.25 | 71  | 1 | GAPVENEAAAEDAAAPASGGDVK                | 102d | 18 |
| FBgn0039537 | 1049.4  | 70  | 1 | GAPVENEAAAEDAAAPASGGDVK                | 132d | 18 |
| FBgn0039537 | 1049.25 | 90  | 2 | GAPVENEAAAEDAAAPASGGDVK                | 12d  | 28 |
| FBgn0039537 | 1049.34 | 79  | 1 | GAPVENEAAAEDAAAPASGGDVK                | 56d  | 28 |
| FBgn0039541 | 1191.02 | 38  | 1 | DNEFIYNEIIPELSTLTSPGK                  | 122d | 18 |
| FBgn0039560 | 504.4   | 44  | 1 | HSSSNSSSSK                             | 22d  | 28 |
| FBgn0039562 | 904.3   | 92  | 3 | KPAEVTEDEYTSFYK                        | 2d   | 18 |
| FBgn0039564 | 566.65  | 37  | 1 | LAEALNVSAELVAQR                        | 22d  | 18 |
| FBgn0039589 | 431.1   | 37  | 1 | YLDENIKLER                             | 2d   | 18 |
| FBgn0039601 | 421.3   | 35  | 1 | NIEYSSK                                | 32d  | 28 |
| FBgn0039602 | 726.61  | 40  | 1 | QIEPARLIDLKR                           | 62d  | 18 |
| FBgn0039635 | 1411.52 | 35  | 1 | SAIRDPDPVVFLENELVYGTAFPVADNVADKDFLPIGK | 2d   | 18 |

|             |         |    |   |                                      |      |    |
|-------------|---------|----|---|--------------------------------------|------|----|
| FBgn0039635 | 619.02  | 48 | 2 | VLSPYDAEDAR                          | 2d   | 18 |
| FBgn0039635 | 702.49  | 71 | 3 | DALNSALDDELAR                        | 22d  | 18 |
| FBgn0039635 | 694.26  | 71 | 1 | AVETSLIAAAELAK                       | 42d  | 18 |
| FBgn0039635 | 702.38  | 54 | 3 | DALNSALDDELAR                        | 42d  | 18 |
| FBgn0039635 | 999.14  | 43 | 2 | IMEDQTFELDAPVWR                      | 42d  | 18 |
| FBgn0039635 | 902.15  | 82 | 1 | VFILGEEVAQYDGAYK                     | 42d  | 18 |
| FBgn0039635 | 702.38  | 59 | 1 | DALNSALDDELAR                        | 62d  | 18 |
| FBgn0039635 | 1269    | 82 | 2 | DPDPVVFLLENELVYGTAFPVADNVADKDFLVPICK | 62d  | 18 |
| FBgn0039635 | 618.83  | 57 | 2 | VLSPYDAEDAR                          | 62d  | 18 |
| FBgn0039635 | 702.25  | 65 | 2 | DALNSALDDELAR                        | 82d  | 18 |
| FBgn0039635 | 618.73  | 52 | 3 | VLSPYDAEDAR                          | 82d  | 18 |
| FBgn0039635 | 694.45  | 90 | 1 | AVETSLIAAAELAK                       | 102d | 18 |
| FBgn0039635 | 702.53  | 58 | 3 | DALNSALDDELAR                        | 102d | 18 |
| FBgn0039635 | 694.53  | 66 | 1 | AVETSLIAAAELAK                       | 112d | 18 |
| FBgn0039635 | 694.39  | 66 | 1 | AVETSLIAAAELAK                       | 122d | 18 |
| FBgn0039635 | 702.15  | 59 | 1 | DALNSALDDELAR                        | 122d | 18 |
| FBgn0039635 | 1268.99 | 64 | 1 | DPDPVVFLLENELVYGTAFPVADNVADKDFLVPICK | 122d | 18 |
| FBgn0039635 | 618.99  | 53 | 2 | VLSPYDAEDAR                          | 132d | 18 |
| FBgn0039635 | 702.41  | 41 | 1 | DALNSALDDELAR                        | 142d | 18 |
| FBgn0039635 | 694.37  | 52 | 1 | AVETSLIAAAELAK                       | 2d   | 28 |
| FBgn0039635 | 702.04  | 66 | 2 | DALNSALDDELAR                        | 2d   | 28 |
| FBgn0039635 | 618.3   | 53 | 3 | VLSPYDAEDAR                          | 2d   | 28 |
| FBgn0039635 | 618.65  | 67 | 3 | VLSPYDAEDAR                          | 12d  | 28 |
| FBgn0039635 | 702.23  | 46 | 1 | DALNSALDDELAR                        | 22d  | 28 |
| FBgn0039635 | 702.46  | 39 | 1 | DALNSALDDELAR                        | 32d  | 28 |
| FBgn0039635 | 618.85  | 41 | 2 | VLSPYDAEDAR                          | 32d  | 28 |
| FBgn0039635 | 694.23  | 77 | 1 | AVETSLIAAAELAK                       | 36d  | 28 |
| FBgn0039635 | 702.35  | 58 | 1 | DALNSALDDELAR                        | 36d  | 28 |
| FBgn0039635 | 557.59  | 43 | 1 | GIEAEVINLR                           | 36d  | 28 |
| FBgn0039635 | 999.65  | 36 | 2 | IMEDQTFELDAPVWR                      | 36d  | 28 |
| FBgn0039635 | 694.24  | 83 | 2 | AVETSLIAAAELAK                       | 42d  | 28 |
| FBgn0039635 | 702.43  | 77 | 2 | DALNSALDDELAR                        | 42d  | 28 |

|             |        |    |   |                      |      |    |
|-------------|--------|----|---|----------------------|------|----|
| FBgn0039635 | 999.48 | 37 | 1 | IMEDQTFEELDAPVWR     | 42d  | 28 |
| FBgn0039635 | 618.86 | 60 | 3 | VLSPYDAEDAR          | 42d  | 28 |
| FBgn0039635 | 618.73 | 35 | 1 | VLSPYDAEDAR          | 46d  | 28 |
| FBgn0039635 | 694.48 | 61 | 1 | AVETSLLLAAAELAK      | 50d  | 28 |
| FBgn0039635 | 573.74 | 57 | 3 | TLDFIPQSPK           | 50d  | 28 |
| FBgn0039635 | 694.36 | 73 | 1 | AVETSLLLAAAELAK      | 52d  | 28 |
| FBgn0039635 | 702.41 | 77 | 3 | DALNSALDDELAR        | 52d  | 28 |
| FBgn0039635 | 618.67 | 36 | 2 | VLSPYDAEDAR          | 52d  | 28 |
| FBgn0039635 | 694.16 | 69 | 1 | AVETSLLLAAAELAK      | 56d  | 28 |
| FBgn0039635 | 999.39 | 92 | 1 | IMEDQTFEELDAPVWR     | 56d  | 28 |
| FBgn0039635 | 902.2  | 48 | 2 | VFILGEEVAQYDGAYK     | 56d  | 28 |
| FBgn0039682 | 657.87 | 43 | 1 | NLIFPNEPDVR          | 22d  | 28 |
| FBgn0039685 | 850.19 | 36 | 1 | FGFYDTEHGFDVHK       | 42d  | 18 |
| FBgn0039685 | 567.31 | 36 | 1 | FGFYDTEHGFDVHK       | 22d  | 28 |
| FBgn0039685 | 571.34 | 40 | 1 | VHASEELVEK           | 22d  | 28 |
| FBgn0039685 | 850.41 | 53 | 1 | FGFYDTEHGFDVHK       | 32d  | 28 |
| FBgn0039685 | 850.32 | 54 | 1 | FGFYDTEHGFDVHK       | 36d  | 28 |
| FBgn0039685 | 571.19 | 47 | 3 | VHASEELVEK           | 36d  | 28 |
| FBgn0039685 | 850.5  | 49 | 1 | FGFYDTEHGFDVHK       | 42d  | 28 |
| FBgn0039685 | 571.17 | 46 | 1 | VHASEELVEK           | 42d  | 28 |
| FBgn0039685 | 571.09 | 44 | 1 | VHASEELVEK           | 46d  | 28 |
| FBgn0039697 | 908.79 | 87 | 2 | HSMNPFDEIAVEEAVK     | 2d   | 18 |
| FBgn0039697 | 677.58 | 40 | 1 | IEVISVEDPPVR         | 2d   | 18 |
| FBgn0039697 | 908.99 | 73 | 1 | HSMNPFDEIAVEEAVK     | 22d  | 18 |
| FBgn0039697 | 715.36 | 61 | 1 | QAGATVADVDALVAK      | 22d  | 18 |
| FBgn0039697 | 677.61 | 49 | 1 | IEVISVEDPPVR         | 62d  | 18 |
| FBgn0039697 | 538.18 | 49 | 2 | EIDGGLETIK           | 82d  | 18 |
| FBgn0039697 | 777.59 | 41 | 1 | GVHVEIPAAEYELLQPIHVS | 82d  | 18 |
| FBgn0039697 | 677.36 | 51 | 1 | IEVISVEDPPVR         | 82d  | 18 |
| FBgn0039697 | 715.61 | 52 | 1 | QAGATVADVDALVAK      | 82d  | 18 |
| FBgn0039697 | 908.93 | 83 | 2 | HSMNPFDEIAVEEAVK     | 102d | 18 |
| FBgn0039697 | 715.39 | 74 | 2 | QAGATVADVDALVAK      | 102d | 18 |

|             |         |     |   |                       |      |    |
|-------------|---------|-----|---|-----------------------|------|----|
| FBgn0039697 | 909.03  | 62  | 1 | HSMNPFDEIAVEEAVK      | 112d | 18 |
| FBgn0039697 | 715.42  | 40  | 1 | QAGATVADVDALVAK       | 112d | 18 |
| FBgn0039697 | 909.01  | 56  | 1 | HSMNPFDEIAVEEAVK      | 122d | 18 |
| FBgn0039697 | 677.6   | 71  | 1 | IEVISVEDPPVR          | 122d | 18 |
| FBgn0039697 | 909     | 60  | 1 | HSMNPFDEIAVEEAVK      | 132d | 18 |
| FBgn0039697 | 676.84  | 43  | 1 | IEVISVEDPPVR          | 132d | 18 |
| FBgn0039697 | 715.42  | 68  | 1 | QAGATVADVDALVAK       | 132d | 18 |
| FBgn0039697 | 715.62  | 56  | 1 | QAGATVADVDALVAK       | 142d | 18 |
| FBgn0039697 | 909.09  | 93  | 3 | HSMNPFDEIAVEEAVK      | 2d   | 28 |
| FBgn0039697 | 677.53  | 85  | 1 | IEVISVEDPPVR          | 2d   | 28 |
| FBgn0039697 | 715.17  | 72  | 3 | QAGATVADVDALVAK       | 2d   | 28 |
| FBgn0039697 | 909.12  | 99  | 2 | HSMNPFDEIAVEEAVK      | 12d  | 28 |
| FBgn0039697 | 677.4   | 53  | 2 | IEVISVEDPPVR          | 12d  | 28 |
| FBgn0039697 | 1112.5  | 52  | 1 | KLAEVIAVSVGPAQSQEVIR  | 12d  | 28 |
| FBgn0039697 | 677.16  | 65  | 2 | IEVISVEDPPVR          | 22d  | 28 |
| FBgn0039697 | 715.33  | 73  | 3 | QAGATVADVDALVAK       | 22d  | 28 |
| FBgn0039697 | 606.23  | 101 | 3 | HSMNPFDEIAVEEAVK      | 32d  | 28 |
| FBgn0039697 | 677.29  | 34  | 1 | IEVISVEDPPVR          | 32d  | 28 |
| FBgn0039697 | 715.54  | 68  | 3 | QAGATVADVDALVAK       | 32d  | 28 |
| FBgn0039697 | 777.52  | 55  | 1 | GVHVEIPAAEYELLQPIHVSK | 36d  | 28 |
| FBgn0039697 | 908.97  | 72  | 2 | HSMNPFDEIAVEEAVK      | 36d  | 28 |
| FBgn0039697 | 677.57  | 42  | 1 | IEVISVEDPPVR          | 36d  | 28 |
| FBgn0039697 | 1112.53 | 41  | 1 | KLAEVIAVSVGPAQSQEVIR  | 36d  | 28 |
| FBgn0039697 | 538.43  | 37  | 1 | EIDGGLETIK            | 42d  | 28 |
| FBgn0039697 | 908.87  | 86  | 3 | HSMNPFDEIAVEEAVK      | 42d  | 28 |
| FBgn0039697 | 677.37  | 71  | 3 | IEVISVEDPPVR          | 42d  | 28 |
| FBgn0039697 | 715.24  | 63  | 2 | QAGATVADVDALVAK       | 42d  | 28 |
| FBgn0039697 | 909.05  | 80  | 3 | HSMNPFDEIAVEEAVK      | 46d  | 28 |
| FBgn0039697 | 715.35  | 63  | 2 | QAGATVADVDALVAK       | 46d  | 28 |
| FBgn0039697 | 908.87  | 90  | 3 | HSMNPFDEIAVEEAVK      | 50d  | 28 |
| FBgn0039697 | 677.6   | 59  | 2 | IEVISVEDPPVR          | 50d  | 28 |
| FBgn0039697 | 715.56  | 68  | 2 | QAGATVADVDALVAK       | 50d  | 28 |

|             |         |    |   |                          |      |    |
|-------------|---------|----|---|--------------------------|------|----|
| FBgn0039697 | 908.85  | 79 | 1 | HSMNPFDEIAVEEAVK         | 52d  | 28 |
| FBgn0039697 | 676.2   | 41 | 1 | IEVISVEDPPVR             | 52d  | 28 |
| FBgn0039697 | 715.41  | 67 | 1 | QAGATVADVDALVAK          | 52d  | 28 |
| FBgn0039697 | 908.83  | 81 | 1 | HSMNPFDEIAVEEAVK         | 56d  | 28 |
| FBgn0039697 | 715.32  | 63 | 1 | QAGATVADVDALVAK          | 56d  | 28 |
| FBgn0039711 | 371.78  | 35 | 1 | AKGSKEASAHK              | 112d | 18 |
| FBgn0039711 | 371.43  | 38 | 1 | AKGSKEASAHK              | 22d  | 28 |
| FBgn0039713 | 805.03  | 44 | 1 | LETGNFAWASEGVAR          | 2d   | 18 |
| FBgn0039713 | 741.01  | 86 | 3 | VEQALEDQFTSGR            | 2d   | 18 |
| FBgn0039731 | 445.33  | 41 | 1 | RAISGFQAQLDK             | 42d  | 28 |
| FBgn0039737 | 1215.65 | 52 | 3 | DGATLQMGIGSIPDAVLAALHNHK | 2d   | 18 |
| FBgn0039737 | 1057.11 | 56 | 1 | GAAEGLDGLGVPIIAMPSTTNK   | 2d   | 18 |
| FBgn0039737 | 1009.07 | 35 | 1 | GDNVPIFLHEIPNLFYK        | 2d   | 18 |
| FBgn0039737 | 747.5   | 63 | 2 | FYSGFGGQVDFIR            | 22d  | 18 |
| FBgn0039737 | 747.23  | 87 | 2 | FYSGFGGQVDFIR            | 42d  | 18 |
| FBgn0039737 | 1056.9  | 67 | 3 | GAAEGLDGLGVPIIAMPSTTNK   | 42d  | 18 |
| FBgn0039737 | 1009.1  | 40 | 1 | GDNVPIFLHEIPNLFYK        | 42d  | 18 |
| FBgn0039737 | 661.28  | 57 | 1 | MYELIQIADPK              | 42d  | 18 |
| FBgn0039737 | 1067.61 | 77 | 2 | SGDTVFAAGAAATPVALLNAMAK  | 42d  | 18 |
| FBgn0039737 | 727.83  | 51 | 1 | SHFDLAI EVTDDL PQHGTGK   | 42d  | 18 |
| FBgn0039737 | 438.72  | 46 | 2 | EGAGVVTSR                | 62d  | 18 |
| FBgn0039737 | 747.48  | 62 | 1 | FYSGFGGQVDFIR            | 62d  | 18 |
| FBgn0039737 | 1009.15 | 60 | 1 | GDNVPIFLHEIPNLFYK        | 62d  | 18 |
| FBgn0039737 | 498.49  | 49 | 1 | LIVAQINPK                | 62d  | 18 |
| FBgn0039737 | 501.55  | 50 | 1 | TFGDIIHK                 | 62d  | 18 |
| FBgn0039737 | 747.17  | 51 | 1 | FYSGFGGQVDFIR            | 82d  | 18 |
| FBgn0039737 | 501.7   | 50 | 2 | TFGDIIHK                 | 82d  | 18 |
| FBgn0039737 | 810.87  | 43 | 1 | DGATLQMGIGSIPDAVLAALHNHK | 102d | 18 |
| FBgn0039737 | 438.88  | 36 | 1 | EGAGVVTSR                | 102d | 18 |
| FBgn0039737 | 747.25  | 64 | 2 | FYSGFGGQVDFIR            | 102d | 18 |
| FBgn0039737 | 1057.24 | 69 | 1 | GAAEGLDGLGVPIIAMPSTTNK   | 102d | 18 |
| FBgn0039737 | 1009.1  | 48 | 1 | GDNVPIFLHEIPNLFYK        | 102d | 18 |



|             |         |    |   |                          |      |    |
|-------------|---------|----|---|--------------------------|------|----|
| FBgn0039737 | 525.38  | 38 | 1 | IVGSFLIGDK               | 102d | 18 |
| FBgn0039737 | 1067.37 | 51 | 2 | SGDTVFAAGAAATPVALLNAMAK  | 102d | 18 |
| FBgn0039737 | 1091.19 | 53 | 1 | SHFDLAIIEVTDDLPHGTGK     | 102d | 18 |
| FBgn0039737 | 747.27  | 67 | 1 | FYSGFGGQVDFIR            | 112d | 18 |
| FBgn0039737 | 1056.94 | 48 | 2 | GAAEGLDGLGVPIIAMPSTTNK   | 112d | 18 |
| FBgn0039737 | 525.25  | 74 | 2 | IVGSFLIGDK               | 112d | 18 |
| FBgn0039737 | 1091.22 | 44 | 1 | SHFDLAIIEVTDDLPHGTGK     | 112d | 18 |
| FBgn0039737 | 746.82  | 65 | 3 | FYSGFGGQVDFIR            | 122d | 18 |
| FBgn0039737 | 1009.27 | 52 | 2 | GDNVPIFLHEIPNLFYK        | 122d | 18 |
| FBgn0039737 | 525.28  | 52 | 2 | IVGSFLIGDK               | 122d | 18 |
| FBgn0039737 | 1067.71 | 55 | 2 | SGDTVFAAGAAATPVALLNAMAK  | 122d | 18 |
| FBgn0039737 | 615.86  | 47 | 1 | SNSFFMGANVR              | 122d | 18 |
| FBgn0039737 | 747.04  | 58 | 3 | FYSGFGGQVDFIR            | 132d | 18 |
| FBgn0039737 | 1056.85 | 53 | 2 | GAAEGLDGLGVPIIAMPSTTNK   | 132d | 18 |
| FBgn0039737 | 1067.71 | 73 | 1 | SGDTVFAAGAAATPVALLNAMAK  | 132d | 18 |
| FBgn0039737 | 1215.65 | 42 | 1 | DGATLQMGIGSIPDAVLAALHNHK | 142d | 18 |
| FBgn0039737 | 438.43  | 37 | 1 | EGAGVVTSR                | 142d | 18 |
| FBgn0039737 | 747.07  | 61 | 2 | FYSGFGGQVDFIR            | 142d | 18 |
| FBgn0039737 | 1067.46 | 73 | 2 | SGDTVFAAGAAATPVALLNAMAK  | 142d | 18 |
| FBgn0039737 | 747.13  | 77 | 2 | FYSGFGGQVDFIR            | 2d   | 28 |
| FBgn0039737 | 1057.3  | 63 | 3 | GAAEGLDGLGVPIIAMPSTTNK   | 2d   | 28 |
| FBgn0039737 | 498.61  | 63 | 2 | LIVAQINPK                | 2d   | 28 |
| FBgn0039737 | 661.3   | 86 | 2 | MYELIQIADPK              | 2d   | 28 |
| FBgn0039737 | 1067.43 | 65 | 2 | SGDTVFAAGAAATPVALLNAMAK  | 2d   | 28 |
| FBgn0039737 | 501.57  | 47 | 2 | TFGDIIHK                 | 2d   | 28 |
| FBgn0039737 | 747.45  | 69 | 1 | FYSGFGGQVDFIR            | 12d  | 28 |
| FBgn0039737 | 1057.25 | 65 | 1 | GAAEGLDGLGVPIIAMPSTTNK   | 12d  | 28 |
| FBgn0039737 | 1009.28 | 41 | 1 | GDNVPIFLHEIPNLFYK        | 12d  | 28 |
| FBgn0039737 | 525.53  | 54 | 1 | IVGSFLIGDK               | 12d  | 28 |
| FBgn0039737 | 1067.58 | 68 | 2 | SGDTVFAAGAAATPVALLNAMAK  | 12d  | 28 |
| FBgn0039737 | 501.65  | 53 | 3 | TFGDIIHK                 | 12d  | 28 |
| FBgn0039737 | 1215.71 | 43 | 1 | DGATLQMGIGSIPDAVLAALHNHK | 22d  | 28 |

|             |         |    |   |                            |     |    |
|-------------|---------|----|---|----------------------------|-----|----|
| FBgn0039737 | 746.82  | 72 | 3 | FYSGFGGQVDFIR              | 22d | 28 |
| FBgn0039737 | 1057.29 | 63 | 1 | GAAEGLDGLGVPIIAMPSTTNK     | 22d | 28 |
| FBgn0039737 | 501.74  | 41 | 2 | TFGDIIHK                   | 22d | 28 |
| FBgn0039737 | 747.47  | 53 | 1 | FYSGFGGQVDFIR              | 32d | 28 |
| FBgn0039737 | 1057.16 | 39 | 1 | GAAEGLDGLGVPIIAMPSTTNK     | 32d | 28 |
| FBgn0039737 | 525.22  | 64 | 2 | IVGSFLIGDK                 | 32d | 28 |
| FBgn0039737 | 661.38  | 65 | 2 | MYELIQIADPK                | 32d | 28 |
| FBgn0039737 | 501.56  | 64 | 3 | TFGDIIHK                   | 32d | 28 |
| FBgn0039737 | 438.74  | 37 | 1 | EGAGVVTSR                  | 36d | 28 |
| FBgn0039737 | 747.48  | 73 | 2 | FYSGFGGQVDFIR              | 36d | 28 |
| FBgn0039737 | 838.89  | 34 | 1 | GAAEGLDGLGVPIIAMPSTTNKGESK | 36d | 28 |
| FBgn0039737 | 1008.76 | 62 | 3 | GDNVPIFLHEIPNLFYK          | 36d | 28 |
| FBgn0039737 | 525.26  | 65 | 2 | IVGSFLIGDK                 | 36d | 28 |
| FBgn0039737 | 661.28  | 92 | 3 | MYELIQIADPK                | 36d | 28 |
| FBgn0039737 | 1067.69 | 68 | 3 | SGDTVFAAGAAATPVALLNAMAK    | 36d | 28 |
| FBgn0039737 | 727.86  | 36 | 1 | SHFDLAI EVTDDL PQHGTGK     | 36d | 28 |
| FBgn0039737 | 615.85  | 48 | 2 | SNSFFMGANVR                | 36d | 28 |
| FBgn0039737 | 1215.82 | 84 | 3 | DGATLQMGIGSIPDAVLAALHNHK   | 42d | 28 |
| FBgn0039737 | 747.61  | 67 | 3 | FYSGFGGQVDFIR              | 42d | 28 |
| FBgn0039737 | 705.05  | 49 | 1 | GAAEGLDGLGVPIIAMPSTTNK     | 42d | 28 |
| FBgn0039737 | 1008.78 | 38 | 1 | GDNVPIFLHEIPNLFYK          | 42d | 28 |
| FBgn0039737 | 525.48  | 64 | 3 | IVGSFLIGDK                 | 42d | 28 |
| FBgn0039737 | 450.95  | 40 | 1 | LIAENLVK                   | 42d | 28 |
| FBgn0039737 | 498.62  | 54 | 2 | LIVAQINPK                  | 42d | 28 |
| FBgn0039737 | 661.33  | 84 | 3 | MYELIQIADPK                | 42d | 28 |
| FBgn0039737 | 1067.6  | 74 | 2 | SGDTVFAAGAAATPVALLNAMAK    | 42d | 28 |
| FBgn0039737 | 1090.98 | 82 | 1 | SHFDLAI EVTDDL PQHGTGK     | 42d | 28 |
| FBgn0039737 | 615.93  | 58 | 3 | SNSFFMGANVR                | 42d | 28 |
| FBgn0039737 | 501.55  | 49 | 3 | TFGDIIHK                   | 42d | 28 |
| FBgn0039737 | 656.15  | 52 | 1 | AHVHYVVTEHGASLFGK          | 46d | 28 |
| FBgn0039737 | 1215.81 | 56 | 2 | DGATLQMGIGSIPDAVLAALHNHK   | 46d | 28 |
| FBgn0039737 | 438.65  | 49 | 1 | EGAGVVTSR                  | 46d | 28 |

|             |         |    |   |                            |     |    |
|-------------|---------|----|---|----------------------------|-----|----|
| FBgn0039737 | 747.34  | 73 | 3 | FYSGFGGQVDFIR              | 46d | 28 |
| FBgn0039737 | 1057.27 | 56 | 2 | GAAEGLDGLGVPIIAMPSTTNK     | 46d | 28 |
| FBgn0039737 | 1009.07 | 45 | 3 | GDNVPIFLHEIPNLFYK          | 46d | 28 |
| FBgn0039737 | 525.29  | 64 | 3 | IVGSFLIGDK                 | 46d | 28 |
| FBgn0039737 | 661.44  | 71 | 2 | MYELIQIADPK                | 46d | 28 |
| FBgn0039737 | 1067.79 | 94 | 2 | SGDTVFAAGGAAATPVALLNAMAK   | 46d | 28 |
| FBgn0039737 | 615.9   | 63 | 3 | SNSFFMGANVR                | 46d | 28 |
| FBgn0039737 | 501.7   | 52 | 3 | TFGDIIIHK                  | 46d | 28 |
| FBgn0039737 | 810.85  | 58 | 2 | DGATLQMGIGSIPDAVLAALHNHK   | 50d | 28 |
| FBgn0039737 | 747.22  | 79 | 3 | FYSGFGGQVDFIR              | 50d | 28 |
| FBgn0039737 | 1056.72 | 42 | 1 | GAAEGLDGLGVPIIAMPSTTNK     | 50d | 28 |
| FBgn0039737 | 1009.04 | 64 | 2 | GDNVPIFLHEIPNLFYK          | 50d | 28 |
| FBgn0039737 | 525.21  | 64 | 2 | IVGSFLIGDK                 | 50d | 28 |
| FBgn0039737 | 661.1   | 52 | 2 | MYELIQIADPK                | 50d | 28 |
| FBgn0039737 | 1067.6  | 84 | 2 | SGDTVFAAGGAAATPVALLNAMAK   | 50d | 28 |
| FBgn0039737 | 501.92  | 43 | 1 | TFGDIIIHK                  | 50d | 28 |
| FBgn0039737 | 810.83  | 38 | 1 | DGATLQMGIGSIPDAVLAALHNHK   | 52d | 28 |
| FBgn0039737 | 833.85  | 40 | 1 | EPPIVKPEEA VACVK           | 52d | 28 |
| FBgn0039737 | 747.43  | 70 | 3 | FYSGFGGQVDFIR              | 52d | 28 |
| FBgn0039737 | 525.12  | 64 | 2 | IVGSFLIGDK                 | 52d | 28 |
| FBgn0039737 | 661.52  | 66 | 2 | MYELIQIADPK                | 52d | 28 |
| FBgn0039737 | 1091.07 | 64 | 1 | SHFDLAIIEVTDDL PQHGTGK     | 52d | 28 |
| FBgn0039737 | 501.7   | 46 | 2 | TFGDIIIHK                  | 52d | 28 |
| FBgn0039737 | 1215.85 | 60 | 2 | DGATLQMGIGSIPDAVLAALHNHK   | 56d | 28 |
| FBgn0039737 | 747.36  | 80 | 3 | FYSGFGGQVDFIR              | 56d | 28 |
| FBgn0039737 | 1057.03 | 59 | 2 | GAAEGLDGLGVPIIAMPSTTNK     | 56d | 28 |
| FBgn0039737 | 525.17  | 68 | 3 | IVGSFLIGDK                 | 56d | 28 |
| FBgn0039737 | 661.2   | 62 | 2 | MYELIQIADPK                | 56d | 28 |
| FBgn0039737 | 1066.97 | 79 | 2 | SGDTVFAAGGAAATPVALLNAMAK   | 56d | 28 |
| FBgn0039743 | 1261.42 | 40 | 1 | GEDSAPIDLLDGAEPVAPPTTGDGVK | 62d | 18 |
| FBgn0039757 | 759.52  | 39 | 1 | IIKPGGSDPDDFEK             | 2d  | 18 |
| FBgn0039757 | 1189.6  | 35 | 1 | TLTAVYDAILEDLVFP AEIVGK    | 42d | 18 |

|             |         |    |   |                             |      |    |
|-------------|---------|----|---|-----------------------------|------|----|
| FBgn0039757 | 759.99  | 38 | 1 | IIKPGGSDPDDFEK              | 62d  | 18 |
| FBgn0039757 | 506.6   | 52 | 3 | IIKPGGSDPDDFEK              | 2d   | 28 |
| FBgn0039757 | 759.75  | 35 | 1 | IIKPGGSDPDDFEK              | 52d  | 28 |
| FBgn0039767 | 370.99  | 40 | 1 | VFFFKSAHK                   | 82d  | 18 |
| FBgn0039767 | 371.29  | 39 | 1 | VFFFKSAHK                   | 32d  | 28 |
| FBgn0039802 | 901.13  | 49 | 1 | DVQILPDTSLAQVASDK           | 42d  | 18 |
| FBgn0039802 | 901.02  | 73 | 2 | DVQILPDTSLAQVASDK           | 62d  | 18 |
| FBgn0039802 | 901.21  | 60 | 1 | DVQILPDTSLAQVASDK           | 82d  | 18 |
| FBgn0039802 | 900.62  | 60 | 1 | DVQILPDTSLAQVASDK           | 112d | 18 |
| FBgn0039802 | 900.88  | 54 | 2 | DVQILPDTSLAQVASDK           | 2d   | 28 |
| FBgn0039854 | 1090.16 | 47 | 1 | NANNTGAAPVNPLQPANEEFK       | 52d  | 28 |
| FBgn0039880 | 404.33  | 35 | 1 | RTQEFK                      | 12d  | 28 |
| FBgn0039897 | 1417.49 | 82 | 2 | ADLVSLNEPNVNDQTSSASDLTAENTK | 12d  | 28 |
| FBgn0039909 | 613.47  | 42 | 1 | APGFAHLAALEK                | 2d   | 18 |
| FBgn0039909 | 702.87  | 51 | 1 | LDEVEDVLTTNR                | 12d  | 28 |
| FBgn0039915 | 731.73  | 69 | 5 | ELGHTTSLQSSPTTTTDTSNK       | 2d   | 18 |
| FBgn0039915 | 731.61  | 38 | 1 | ELGHTTSLQSSPTTTTDTSNK       | 22d  | 18 |
| FBgn0039915 | 731.73  | 38 | 1 | ELGHTTSLQSSPTTTTDTSNK       | 2d   | 28 |
| FBgn0039915 | 731.69  | 50 | 2 | ELGHTTSLQSSPTTTTDTSNK       | 46d  | 28 |
| FBgn0039958 | 981.29  | 36 | 1 | ACEQTKQGLVELNPAFR           | 62d  | 18 |
| FBgn0040005 | 785.37  | 45 | 1 | LEIEKLINKNIDK               | 22d  | 18 |
| FBgn0040037 | 432.16  | 41 | 1 | IIFDNLK                     | 62d  | 18 |
| FBgn0040061 | 682.9   | 54 | 1 | GAVDGGLNIPHSVK              | 2d   | 28 |
| FBgn0040064 | 687.77  | 67 | 3 | GINQTQLQTAAK                | 2d   | 18 |
| FBgn0040064 | 1096.62 | 58 | 1 | LCGSGFQSIVNGAQDILVGGAK      | 2d   | 18 |
| FBgn0040064 | 931.31  | 50 | 2 | LNVNGGAIALGHPLGASGR         | 2d   | 18 |
| FBgn0040064 | 731.44  | 41 | 2 | LCGSGFQSIVNGAQDILVGGAK      | 22d  | 18 |
| FBgn0040064 | 931.36  | 63 | 2 | LNVNGGAIALGHPLGASGR         | 22d  | 18 |
| FBgn0040064 | 645.86  | 61 | 2 | EGAFNAEITPIK                | 42d  | 18 |
| FBgn0040064 | 687.71  | 72 | 2 | GINQTQLQTAAK                | 42d  | 18 |
| FBgn0040064 | 1096.55 | 69 | 2 | LCGSGFQSIVNGAQDILVGGAK      | 42d  | 18 |
| FBgn0040064 | 931.44  | 77 | 3 | LNVNGGAIALGHPLGASGR         | 42d  | 18 |

|             |         |     |   |                               |      |    |
|-------------|---------|-----|---|-------------------------------|------|----|
| FBgn0040064 | 840.17  | 122 | 3 | LPMALTAENLADQYK               | 42d  | 18 |
| FBgn0040064 | 543.64  | 55  | 2 | TAFGTFGGSLK                   | 42d  | 18 |
| FBgn0040064 | 931.35  | 76  | 1 | LNVNGGAIALGHPLGASGR           | 62d  | 18 |
| FBgn0040064 | 543.92  | 57  | 1 | TAFGTFGGSLK                   | 62d  | 18 |
| FBgn0040064 | 645.91  | 45  | 1 | EGAFNAEITPIK                  | 82d  | 18 |
| FBgn0040064 | 688.1   | 76  | 2 | GINQTQLQTAAK                  | 82d  | 18 |
| FBgn0040064 | 1096.68 | 97  | 1 | LCGSGFQSIVNGAQDILVGGAK        | 82d  | 18 |
| FBgn0040064 | 931.44  | 78  | 3 | LNVNGGAIALGHPLGASGR           | 82d  | 18 |
| FBgn0040064 | 543.85  | 40  | 1 | TAFGTFGGSLK                   | 82d  | 18 |
| FBgn0040064 | 784.54  | 35  | 1 | EVDFVVDHPRPK                  | 102d | 18 |
| FBgn0040064 | 1289.18 | 61  | 1 | GEQVDTVIVGNVIASSSTDGIYVPR     | 102d | 18 |
| FBgn0040064 | 687.81  | 74  | 2 | GINQTQLQTAAK                  | 102d | 18 |
| FBgn0040064 | 1096.61 | 62  | 1 | LCGSGFQSIVNGAQDILVGGAK        | 102d | 18 |
| FBgn0040064 | 1324.77 | 70  | 2 | NGVVTAGTAGSGICDGASAVIVASEEALK | 102d | 18 |
| FBgn0040064 | 645.83  | 62  | 1 | EGAFNAEITPIK                  | 112d | 18 |
| FBgn0040064 | 931.68  | 52  | 1 | LNVNGGAIALGHPLGASGR           | 112d | 18 |
| FBgn0040064 | 839.97  | 60  | 1 | LPMALTAENLADQYK               | 112d | 18 |
| FBgn0040064 | 646.03  | 45  | 1 | EGAFNAEITPIK                  | 122d | 18 |
| FBgn0040064 | 931.61  | 47  | 2 | LNVNGGAIALGHPLGASGR           | 122d | 18 |
| FBgn0040064 | 1324.43 | 52  | 1 | NGVVTAGTAGSGICDGASAVIVASEEALK | 122d | 18 |
| FBgn0040064 | 931.53  | 58  | 2 | LNVNGGAIALGHPLGASGR           | 132d | 18 |
| FBgn0040064 | 839.9   | 42  | 1 | LPMALTAENLADQYK               | 132d | 18 |
| FBgn0040064 | 1324.88 | 62  | 1 | NGVVTAGTAGSGICDGASAVIVASEEALK | 132d | 18 |
| FBgn0040064 | 543.74  | 48  | 2 | TAFGTFGGSLK                   | 132d | 18 |
| FBgn0040064 | 687.76  | 81  | 2 | GINQTQLQTAAK                  | 142d | 18 |
| FBgn0040064 | 931.73  | 46  | 1 | LNVNGGAIALGHPLGASGR           | 142d | 18 |
| FBgn0040064 | 840.07  | 56  | 1 | LPMALTAENLADQYK               | 142d | 18 |
| FBgn0040064 | 1324.64 | 58  | 1 | NGVVTAGTAGSGICDGASAVIVASEEALK | 142d | 18 |
| FBgn0040064 | 645.8   | 50  | 2 | EGAFNAEITPIK                  | 2d   | 28 |
| FBgn0040064 | 725.98  | 39  | 1 | ERVDEFSLLSQK                  | 2d   | 28 |
| FBgn0040064 | 688.04  | 63  | 3 | GINQTQLQTAAK                  | 2d   | 28 |
| FBgn0040064 | 1096.44 | 37  | 1 | LCGSGFQSIVNGAQDILVGGAK        | 2d   | 28 |

|             |         |     |   |                        |     |    |
|-------------|---------|-----|---|------------------------|-----|----|
| FBgn0040064 | 931.2   | 71  | 3 | LNVNGGAIALGHPLGASGSR   | 2d  | 28 |
| FBgn0040064 | 840.03  | 59  | 1 | LPMALTAENLADQYK        | 2d  | 28 |
| FBgn0040064 | 645.57  | 52  | 1 | EGAFNAEITPIK           | 12d | 28 |
| FBgn0040064 | 687.75  | 66  | 2 | GINQTQLQTAAK           | 12d | 28 |
| FBgn0040064 | 931.32  | 70  | 3 | LNVNGGAIALGHPLGASGSR   | 12d | 28 |
| FBgn0040064 | 839.77  | 84  | 3 | LPMALTAENLADQYK        | 12d | 28 |
| FBgn0040064 | 543.84  | 56  | 3 | TAFGTFGGSLK            | 12d | 28 |
| FBgn0040064 | 726.43  | 55  | 1 | ERVDEFSLLSQK           | 22d | 28 |
| FBgn0040064 | 1096.51 | 97  | 2 | LCGSGFQSIVNGAQDILVGGAK | 22d | 28 |
| FBgn0040064 | 931.45  | 80  | 3 | LNVNGGAIALGHPLGASGSR   | 22d | 28 |
| FBgn0040064 | 840     | 93  | 2 | LPMALTAENLADQYK        | 22d | 28 |
| FBgn0040064 | 781.65  | 57  | 2 | TTIEGLNKLPSLFK         | 22d | 28 |
| FBgn0040064 | 645.7   | 56  | 1 | EGAFNAEITPIK           | 32d | 28 |
| FBgn0040064 | 1096.5  | 80  | 3 | LCGSGFQSIVNGAQDILVGGAK | 32d | 28 |
| FBgn0040064 | 839.95  | 88  | 3 | LPMALTAENLADQYK        | 32d | 28 |
| FBgn0040064 | 543.84  | 60  | 3 | TAFGTFGGSLK            | 32d | 28 |
| FBgn0040064 | 645.91  | 76  | 3 | EGAFNAEITPIK           | 36d | 28 |
| FBgn0040064 | 1096.7  | 112 | 3 | LCGSGFQSIVNGAQDILVGGAK | 36d | 28 |
| FBgn0040064 | 621.49  | 60  | 4 | LNVNGGAIALGHPLGASGSR   | 36d | 28 |
| FBgn0040064 | 839.89  | 77  | 2 | LPMALTAENLADQYK        | 36d | 28 |
| FBgn0040064 | 543.67  | 40  | 3 | TAFGTFGGSLK            | 36d | 28 |
| FBgn0040064 | 645.77  | 75  | 2 | EGAFNAEITPIK           | 42d | 28 |
| FBgn0040064 | 726.4   | 60  | 1 | ERVDEFSLLSQK           | 42d | 28 |
| FBgn0040064 | 784.28  | 42  | 1 | EVDFVVEHPRPK           | 42d | 28 |
| FBgn0040064 | 687.77  | 79  | 3 | GINQTQLQTAAK           | 42d | 28 |
| FBgn0040064 | 1096.54 | 88  | 3 | LCGSGFQSIVNGAQDILVGGAK | 42d | 28 |
| FBgn0040064 | 840.18  | 97  | 1 | LPMALTAENLADQYK        | 42d | 28 |
| FBgn0040064 | 543.66  | 43  | 2 | TAFGTFGGSLK            | 42d | 28 |
| FBgn0040064 | 645.79  | 40  | 1 | EGAFNAEITPIK           | 46d | 28 |
| FBgn0040064 | 726.33  | 55  | 1 | ERVDEFSLLSQK           | 46d | 28 |
| FBgn0040064 | 523.33  | 45  | 1 | EVDFVVEHPRPK           | 46d | 28 |
| FBgn0040064 | 687.72  | 64  | 1 | GINQTQLQTAAK           | 46d | 28 |

|             |         |     |   |                              |      |    |
|-------------|---------|-----|---|------------------------------|------|----|
| FBgn0040064 | 1096.76 | 88  | 3 | LCGSGFQSIVNGAQDILVGGAK       | 46d  | 28 |
| FBgn0040064 | 931.31  | 55  | 1 | LNVNGGAIALGHPLGASGR          | 46d  | 28 |
| FBgn0040064 | 840.17  | 98  | 1 | LPMALTAENLADQYK              | 46d  | 28 |
| FBgn0040064 | 543.65  | 38  | 1 | TAFGTFGGSLK                  | 46d  | 28 |
| FBgn0040064 | 645.87  | 73  | 5 | EGAFNAEITPIK                 | 50d  | 28 |
| FBgn0040064 | 688.01  | 58  | 1 | GINQTQLQTAAK                 | 50d  | 28 |
| FBgn0040064 | 1096.46 | 58  | 2 | LCGSGFQSIVNGAQDILVGGAK       | 50d  | 28 |
| FBgn0040064 | 931.23  | 80  | 2 | LNVNGGAIALGHPLGASGR          | 50d  | 28 |
| FBgn0040064 | 839.94  | 52  | 1 | LPMALTAENLADQYK              | 50d  | 28 |
| FBgn0040064 | 731.48  | 76  | 2 | LCGSGFQSIVNGAQDILVGGAK       | 52d  | 28 |
| FBgn0040064 | 931.4   | 85  | 3 | LNVNGGAIALGHPLGASGR          | 52d  | 28 |
| FBgn0040064 | 1324.58 | 93  | 3 | NGVVTAGTASGICDGASAVIVASEEALK | 52d  | 28 |
| FBgn0040064 | 688.11  | 63  | 1 | GINQTQLQTAAK                 | 56d  | 28 |
| FBgn0040064 | 1096.42 | 128 | 3 | LCGSGFQSIVNGAQDILVGGAK       | 56d  | 28 |
| FBgn0040064 | 931.6   | 71  | 3 | LNVNGGAIALGHPLGASGR          | 56d  | 28 |
| FBgn0040064 | 839.96  | 88  | 2 | LPMALTAENLADQYK              | 56d  | 28 |
| FBgn0040064 | 1324.52 | 59  | 1 | NGVVTAGTASGICDGASAVIVASEEALK | 56d  | 28 |
| FBgn0040070 | 602.94  | 54  | 1 | DKADLDGQLTK                  | 62d  | 18 |
| FBgn0040070 | 602.72  | 48  | 2 | DKADLDGQLTK                  | 2d   | 28 |
| FBgn0040074 | 568.43  | 43  | 1 | LVTPIVAPAVR                  | 2d   | 18 |
| FBgn0040074 | 647.01  | 42  | 1 | RLVTPIVAPAVR                 | 2d   | 18 |
| FBgn0040074 | 568.85  | 42  | 2 | LVTPIVAPAVR                  | 22d  | 18 |
| FBgn0040074 | 636.09  | 59  | 3 | TVLTIQEPAAK                  | 22d  | 18 |
| FBgn0040074 | 569.03  | 52  | 2 | LVTPIVAPAVR                  | 42d  | 18 |
| FBgn0040074 | 797.96  | 48  | 2 | QQPPLLWSVASDPR               | 42d  | 18 |
| FBgn0040074 | 636.05  | 59  | 3 | TVLTIQEPAAK                  | 42d  | 18 |
| FBgn0040074 | 568.75  | 48  | 3 | LVTPIVAPAVR                  | 62d  | 18 |
| FBgn0040074 | 359.36  | 38  | 1 | TTQVIR                       | 62d  | 18 |
| FBgn0040074 | 635.89  | 59  | 2 | TVLTIQEPAAK                  | 62d  | 18 |
| FBgn0040074 | 635.31  | 55  | 2 | TVLTIQEPAAK                  | 82d  | 18 |
| FBgn0040074 | 636.12  | 54  | 1 | TVLTIQEPAAK                  | 102d | 18 |
| FBgn0040074 | 568.76  | 41  | 1 | LVTPIVAPAVR                  | 122d | 18 |

|             |        |    |   |                |      |    |
|-------------|--------|----|---|----------------|------|----|
| FBgn0040074 | 636.02 | 50 | 1 | TVLTIQEPAAVAK  | 122d | 18 |
| FBgn0040074 | 569.06 | 35 | 1 | LVTPIVAPAVR    | 132d | 18 |
| FBgn0040074 | 635.93 | 56 | 2 | TVLTIQEPAAVAK  | 132d | 18 |
| FBgn0040074 | 359.91 | 38 | 2 | TTQVIR         | 142d | 18 |
| FBgn0040074 | 636.04 | 54 | 1 | TVLTIQEPAAVAK  | 142d | 18 |
| FBgn0040074 | 569.05 | 48 | 2 | LVTPIVAPAVR    | 2d   | 28 |
| FBgn0040074 | 797.98 | 47 | 1 | QQPPLLWSVASDPR | 2d   | 28 |
| FBgn0040074 | 647.06 | 37 | 2 | RLVTPIVAPAVR   | 2d   | 28 |
| FBgn0040074 | 635.77 | 64 | 2 | TVLTIQEPAAVAK  | 2d   | 28 |
| FBgn0040074 | 568.7  | 61 | 5 | LVTPIVAPAVR    | 12d  | 28 |
| FBgn0040074 | 647.09 | 37 | 2 | RLVTPIVAPAVR   | 12d  | 28 |
| FBgn0040074 | 359.73 | 38 | 2 | TTQVIR         | 12d  | 28 |
| FBgn0040074 | 635.78 | 55 | 3 | TVLTIQEPAAVAK  | 12d  | 28 |
| FBgn0040074 | 568.77 | 52 | 2 | LVTPIVAPAVR    | 22d  | 28 |
| FBgn0040074 | 646.78 | 44 | 1 | RLVTPIVAPAVR   | 22d  | 28 |
| FBgn0040074 | 635.87 | 57 | 2 | TVLTIQEPAAVAK  | 22d  | 28 |
| FBgn0040074 | 568.63 | 39 | 1 | LVTPIVAPAVR    | 32d  | 28 |
| FBgn0040074 | 635.85 | 56 | 3 | TVLTIQEPAAVAK  | 32d  | 28 |
| FBgn0040074 | 569.06 | 44 | 2 | LVTPIVAPAVR    | 36d  | 28 |
| FBgn0040074 | 635.73 | 54 | 3 | TVLTIQEPAAVAK  | 36d  | 28 |
| FBgn0040074 | 568.69 | 46 | 1 | LVTPIVAPAVR    | 42d  | 28 |
| FBgn0040074 | 797.8  | 48 | 1 | QQPPLLWSVASDPR | 42d  | 28 |
| FBgn0040074 | 359.57 | 37 | 1 | TTQVIR         | 42d  | 28 |
| FBgn0040074 | 636    | 55 | 2 | TVLTIQEPAAVAK  | 42d  | 28 |
| FBgn0040074 | 568.92 | 55 | 1 | LVTPIVAPAVR    | 46d  | 28 |
| FBgn0040074 | 646.75 | 37 | 1 | RLVTPIVAPAVR   | 46d  | 28 |
| FBgn0040074 | 359.48 | 40 | 1 | TTQVIR         | 46d  | 28 |
| FBgn0040074 | 635.83 | 60 | 2 | TVLTIQEPAAVAK  | 46d  | 28 |
| FBgn0040074 | 568.69 | 44 | 2 | LVTPIVAPAVR    | 50d  | 28 |
| FBgn0040074 | 359.82 | 40 | 1 | TTQVIR         | 50d  | 28 |
| FBgn0040074 | 635.42 | 57 | 3 | TVLTIQEPAAVAK  | 50d  | 28 |
| FBgn0040074 | 568.93 | 40 | 1 | LVTPIVAPAVR    | 52d  | 28 |



|             |         |    |   |                       |      |    |
|-------------|---------|----|---|-----------------------|------|----|
| FBgn0040074 | 635.8   | 54 | 2 | TVLTIQEPAAVAK         | 52d  | 28 |
| FBgn0040074 | 568.77  | 45 | 2 | LVTPIVAPAVR           | 56d  | 28 |
| FBgn0040074 | 635.8   | 62 | 3 | TVLTIQEPAAVAK         | 56d  | 28 |
| FBgn0040078 | 736.63  | 37 | 1 | EAAGIVVDLIKSKK        | 2d   | 28 |
| FBgn0040309 | 817.81  | 49 | 1 | YGEVCPANWKPGQK        | 2d   | 18 |
| FBgn0040309 | 822.57  | 50 | 1 | KQGGLGSMDIPLLADK      | 22d  | 18 |
| FBgn0040309 | 714.31  | 38 | 2 | PQLQKPAPAFAGTAVVNGVFK | 22d  | 18 |
| FBgn0040309 | 545.57  | 44 | 1 | YGEVCPANWKPGQK        | 22d  | 18 |
| FBgn0040309 | 806.63  | 45 | 1 | DYGVLEETGIPFR         | 42d  | 18 |
| FBgn0040309 | 714.51  | 61 | 1 | PQLQKPAPAFAGTAVVNGVFK | 42d  | 18 |
| FBgn0040309 | 758.62  | 52 | 1 | QGGGLGSMDIPLLADK      | 42d  | 18 |
| FBgn0040309 | 806.28  | 35 | 1 | DYGVLEETGIPFR         | 62d  | 18 |
| FBgn0040309 | 1071.34 | 51 | 1 | PQLQKPAPAFAGTAVVNGVFK | 62d  | 18 |
| FBgn0040309 | 714.41  | 54 | 1 | PQLQKPAPAFAGTAVVNGVFK | 112d | 18 |
| FBgn0040309 | 461.18  | 40 | 1 | GLFIIDDK              | 122d | 18 |
| FBgn0040309 | 822.39  | 39 | 1 | KQGGLGSMDIPLLADK      | 132d | 18 |
| FBgn0040309 | 822.51  | 47 | 1 | KQGGLGSMDIPLLADK      | 142d | 18 |
| FBgn0040309 | 806.58  | 50 | 2 | DYGVLEETGIPFR         | 2d   | 28 |
| FBgn0040309 | 822.41  | 73 | 2 | KQGGLGSMDIPLLADK      | 2d   | 28 |
| FBgn0040309 | 1071.23 | 83 | 2 | PQLQKPAPAFAGTAVVNGVFK | 2d   | 28 |
| FBgn0040309 | 817.97  | 47 | 1 | YGEVCPANWKPGQK        | 2d   | 28 |
| FBgn0040309 | 1071.19 | 91 | 3 | PQLQKPAPAFAGTAVVNGVFK | 12d  | 28 |
| FBgn0040309 | 1071.12 | 47 | 1 | PQLQKPAPAFAGTAVVNGVFK | 22d  | 28 |
| FBgn0040309 | 806.31  | 35 | 1 | DYGVLEETGIPFR         | 32d  | 28 |
| FBgn0040309 | 606.92  | 42 | 1 | QITVNDLPVGR           | 36d  | 28 |
| FBgn0040309 | 822.31  | 55 | 2 | KQGGLGSMDIPLLADK      | 42d  | 28 |
| FBgn0040309 | 714.51  | 71 | 1 | PQLQKPAPAFAGTAVVNGVFK | 50d  | 28 |
| FBgn0040309 | 758.5   | 63 | 1 | QGGGLGSMDIPLLADK      | 50d  | 28 |
| FBgn0040309 | 806.47  | 35 | 1 | DYGVLEETGIPFR         | 52d  | 28 |
| FBgn0040309 | 817.76  | 75 | 3 | YGEVCPANWKPGQK        | 52d  | 28 |
| FBgn0040309 | 806.23  | 52 | 2 | DYGVLEETGIPFR         | 56d  | 28 |
| FBgn0040309 | 758.29  | 51 | 1 | QGGGLGSMDIPLLADK      | 56d  | 28 |

|             |        |    |   |                   |      |    |
|-------------|--------|----|---|-------------------|------|----|
| FBgn0040344 | 628.14 | 35 | 1 | MLECAEFVGAK       | 12d  | 28 |
| FBgn0040381 | 945.16 | 63 | 1 | SDFMTVLSDLQHILIR  | 42d  | 18 |
| FBgn0040398 | 890.69 | 35 | 1 | SISPEWDLPLQLVLGPK | 2d   | 28 |
| FBgn0040502 | 413.27 | 36 | 1 | FAIGAFAK          | 132d | 18 |
| FBgn0040502 | 785.31 | 60 | 2 | NFQNGLPGYSSDNR    | 32d  | 28 |
| FBgn0040502 | 785.55 | 44 | 1 | NFQNGLPGYSSDNR    | 36d  | 28 |
| FBgn0040502 | 785.28 | 46 | 1 | NFQNGLPGYSSDNR    | 50d  | 28 |
| FBgn0040529 | 548.68 | 51 | 1 | LFYELSVPK         | 102d | 18 |
| FBgn0040582 | 755.48 | 74 | 1 | SFSSSPGDGNVVISR   | 132d | 18 |
| FBgn0040582 | 755.27 | 68 | 1 | SFSSSPGDGNVVISR   | 42d  | 28 |
| FBgn0040660 | 504.6  | 37 | 1 | EEEYFYK           | 62d  | 18 |
| FBgn0040660 | 515.53 | 38 | 1 | EFLENLHK          | 82d  | 18 |
| FBgn0040765 | 493.81 | 47 | 1 | LLEELKIK          | 36d  | 28 |
| FBgn0040813 | 649.84 | 58 | 5 | AQGDFNEFIEK       | 2d   | 18 |
| FBgn0040813 | 652.06 | 70 | 3 | DGLNTVQEGLQK      | 2d   | 18 |
| FBgn0040813 | 697.24 | 59 | 3 | EESNPAQEFLTK      | 2d   | 18 |
| FBgn0040813 | 649.78 | 58 | 1 | AQGDFNEFIEK       | 22d  | 18 |
| FBgn0040813 | 651.93 | 70 | 2 | DGLNTVQEGLQK      | 22d  | 18 |
| FBgn0040813 | 697.09 | 76 | 6 | EESNPAQEFLTK      | 22d  | 18 |
| FBgn0040813 | 649.68 | 58 | 3 | AQGDFNEFIEK       | 42d  | 18 |
| FBgn0040813 | 697.2  | 60 | 3 | EESNPAQEFLTK      | 42d  | 18 |
| FBgn0040813 | 649.8  | 59 | 4 | AQGDFNEFIEK       | 62d  | 18 |
| FBgn0040813 | 651.77 | 73 | 4 | DGLNTVQEGLQK      | 62d  | 18 |
| FBgn0040813 | 697.49 | 59 | 2 | EESNPAQEFLTK      | 62d  | 18 |
| FBgn0040813 | 411.4  | 43 | 4 | KVEGLFK           | 62d  | 18 |
| FBgn0040813 | 649.76 | 60 | 4 | AQGDFNEFIEK       | 82d  | 18 |
| FBgn0040813 | 651.38 | 70 | 3 | DGLNTVQEGLQK      | 82d  | 18 |
| FBgn0040813 | 697.16 | 65 | 3 | EESNPAQEFLTK      | 82d  | 18 |
| FBgn0040813 | 411.28 | 42 | 1 | KVEGLFK           | 82d  | 18 |
| FBgn0040813 | 649.96 | 59 | 3 | AQGDFNEFIEK       | 102d | 18 |
| FBgn0040813 | 652.07 | 54 | 2 | DGLNTVQEGLQK      | 102d | 18 |
| FBgn0040813 | 697.14 | 68 | 2 | EESNPAQEFLTK      | 102d | 18 |

|             |        |    |   |              |      |    |
|-------------|--------|----|---|--------------|------|----|
| FBgn0040813 | 411.24 | 36 | 1 | KVEGLFK      | 102d | 18 |
| FBgn0040813 | 649.91 | 58 | 3 | AQGDFNEFIEK  | 112d | 18 |
| FBgn0040813 | 697.43 | 69 | 4 | EESNPAQEFLTK | 112d | 18 |
| FBgn0040813 | 411.27 | 38 | 1 | KVEGLFK      | 112d | 18 |
| FBgn0040813 | 649.93 | 57 | 4 | AQGDFNEFIEK  | 122d | 18 |
| FBgn0040813 | 651.23 | 37 | 1 | DGLNTVQEGLQK | 122d | 18 |
| FBgn0040813 | 697.21 | 62 | 3 | EESNPAQEFLTK | 122d | 18 |
| FBgn0040813 | 649.71 | 59 | 5 | AQGDFNEFIEK  | 132d | 18 |
| FBgn0040813 | 651.76 | 70 | 2 | DGLNTVQEGLQK | 132d | 18 |
| FBgn0040813 | 697.04 | 73 | 1 | EESNPAQEFLTK | 132d | 18 |
| FBgn0040813 | 411.19 | 36 | 3 | KVEGLFK      | 132d | 18 |
| FBgn0040813 | 650.01 | 54 | 2 | AQGDFNEFIEK  | 142d | 18 |
| FBgn0040813 | 697.14 | 54 | 1 | EESNPAQEFLTK | 142d | 18 |
| FBgn0040813 | 411.33 | 38 | 1 | KVEGLFK      | 142d | 18 |
| FBgn0040813 | 649.86 | 58 | 6 | AQGDFNEFIEK  | 2d   | 28 |
| FBgn0040813 | 651.64 | 67 | 3 | DGLNTVQEGLQK | 2d   | 28 |
| FBgn0040813 | 697.21 | 73 | 5 | EESNPAQEFLTK | 2d   | 28 |
| FBgn0040813 | 649.49 | 58 | 6 | AQGDFNEFIEK  | 12d  | 28 |
| FBgn0040813 | 651.63 | 58 | 2 | DGLNTVQEGLQK | 12d  | 28 |
| FBgn0040813 | 697.4  | 69 | 6 | EESNPAQEFLTK | 12d  | 28 |
| FBgn0040813 | 649.71 | 38 | 1 | AQGDFNEFIEK  | 22d  | 28 |
| FBgn0040813 | 651.68 | 53 | 3 | DGLNTVQEGLQK | 22d  | 28 |
| FBgn0040813 | 697.03 | 65 | 4 | EESNPAQEFLTK | 22d  | 28 |
| FBgn0040813 | 649.88 | 59 | 2 | AQGDFNEFIEK  | 32d  | 28 |
| FBgn0040813 | 651.8  | 65 | 1 | DGLNTVQEGLQK | 32d  | 28 |
| FBgn0040813 | 697.38 | 68 | 4 | EESNPAQEFLTK | 32d  | 28 |
| FBgn0040813 | 649.81 | 55 | 2 | AQGDFNEFIEK  | 36d  | 28 |
| FBgn0040813 | 651.98 | 72 | 3 | DGLNTVQEGLQK | 36d  | 28 |
| FBgn0040813 | 697.21 | 61 | 6 | EESNPAQEFLTK | 36d  | 28 |
| FBgn0040813 | 649.7  | 50 | 1 | AQGDFNEFIEK  | 42d  | 28 |
| FBgn0040813 | 651.71 | 70 | 3 | DGLNTVQEGLQK | 42d  | 28 |
| FBgn0040813 | 697.18 | 66 | 6 | EESNPAQEFLTK | 42d  | 28 |

|             |         |     |   |                        |      |    |
|-------------|---------|-----|---|------------------------|------|----|
| FBgn0040813 | 649.94  | 58  | 5 | AQGDFNEFIEK            | 46d  | 28 |
| FBgn0040813 | 651.89  | 67  | 3 | DGLNTVQEGLQK           | 46d  | 28 |
| FBgn0040813 | 697.52  | 64  | 6 | EESNPAQEFLTK           | 46d  | 28 |
| FBgn0040813 | 649.67  | 55  | 3 | AQGDFNEFIEK            | 50d  | 28 |
| FBgn0040813 | 651.64  | 72  | 2 | DGLNTVQEGLQK           | 50d  | 28 |
| FBgn0040813 | 697.35  | 72  | 6 | EESNPAQEFLTK           | 50d  | 28 |
| FBgn0040813 | 652.08  | 70  | 2 | DGLNTVQEGLQK           | 52d  | 28 |
| FBgn0040813 | 697.28  | 63  | 5 | EESNPAQEFLTK           | 52d  | 28 |
| FBgn0040813 | 649.9   | 58  | 1 | AQGDFNEFIEK            | 56d  | 28 |
| FBgn0040813 | 651.68  | 72  | 2 | DGLNTVQEGLQK           | 56d  | 28 |
| FBgn0040813 | 697.45  | 59  | 3 | EESNPAQEFLTK           | 56d  | 28 |
| FBgn0040954 | 1316.53 | 68  | 2 | SEDLGLLEEDDEFEEFPAEDFR | 2d   | 18 |
| FBgn0041100 | 387.81  | 39  | 1 | WDEASNVTIK             | 12d  | 28 |
| FBgn0041194 | 848.01  | 43  | 1 | GMGMINNLFNDEAIR        | 56d  | 28 |
| FBgn0041605 | 1147.77 | 71  | 2 | KTPEELAAEAEQEELDDFTK   | 2d   | 18 |
| FBgn0041605 | 1083.27 | 91  | 2 | TPEELAAEAEQEELDDFTK    | 2d   | 18 |
| FBgn0041605 | 1147.76 | 74  | 2 | KTPEELAAEAEQEELDDFTK   | 22d  | 18 |
| FBgn0041605 | 1083.11 | 92  | 2 | TPEELAAEAEQEELDDFTK    | 22d  | 18 |
| FBgn0041605 | 1083.37 | 110 | 3 | TPEELAAEAEQEELDDFTK    | 42d  | 18 |
| FBgn0041605 | 1083.58 | 107 | 3 | TPEELAAEAEQEELDDFTK    | 62d  | 18 |
| FBgn0041605 | 1147.49 | 79  | 2 | KTPEELAAEAEQEELDDFTK   | 82d  | 18 |
| FBgn0041605 | 1083.37 | 78  | 1 | TPEELAAEAEQEELDDFTK    | 82d  | 18 |
| FBgn0041605 | 1083.26 | 111 | 1 | TPEELAAEAEQEELDDFTK    | 112d | 18 |
| FBgn0041605 | 1083.34 | 60  | 1 | TPEELAAEAEQEELDDFTK    | 132d | 18 |
| FBgn0041605 | 1083.06 | 74  | 2 | TPEELAAEAEQEELDDFTK    | 142d | 18 |
| FBgn0041605 | 1147.44 | 95  | 2 | KTPEELAAEAEQEELDDFTK   | 2d   | 28 |
| FBgn0041605 | 1083.72 | 89  | 3 | TPEELAAEAEQEELDDFTK    | 2d   | 28 |
| FBgn0041605 | 1083.27 | 88  | 3 | TPEELAAEAEQEELDDFTK    | 12d  | 28 |
| FBgn0041605 | 1147.62 | 47  | 1 | KTPEELAAEAEQEELDDFTK   | 22d  | 28 |
| FBgn0041605 | 1083.61 | 106 | 1 | TPEELAAEAEQEELDDFTK    | 22d  | 28 |
| FBgn0041605 | 1147.55 | 72  | 1 | KTPEELAAEAEQEELDDFTK   | 32d  | 28 |
| FBgn0041605 | 1083.7  | 112 | 3 | TPEELAAEAEQEELDDFTK    | 32d  | 28 |

|             |         |     |   |                        |      |    |
|-------------|---------|-----|---|------------------------|------|----|
| FBgn0041605 | 1083.05 | 92  | 2 | TPEELAAEAEQEELDDFTK    | 36d  | 28 |
| FBgn0041605 | 1083.04 | 98  | 3 | TPEELAAEAEQEELDDFTK    | 42d  | 28 |
| FBgn0041605 | 1083.4  | 101 | 3 | TPEELAAEAEQEELDDFTK    | 46d  | 28 |
| FBgn0041605 | 1083.58 | 98  | 3 | TPEELAAEAEQEELDDFTK    | 50d  | 28 |
| FBgn0041605 | 1083.29 | 99  | 3 | TPEELAAEAEQEELDDFTK    | 52d  | 28 |
| FBgn0041605 | 1083.3  | 102 | 3 | TPEELAAEAEQEELDDFTK    | 56d  | 28 |
| FBgn0041713 | 850.2   | 76  | 1 | LWVLDTGLADILGSPK       | 2d   | 18 |
| FBgn0041713 | 850.22  | 59  | 1 | LWVLDTGLADILGSPK       | 132d | 18 |
| FBgn0042119 | 879.81  | 74  | 1 | YEISFTADETGYPK         | 22d  | 18 |
| FBgn0042119 | 943.86  | 75  | 3 | KYEISFTADETGYPK        | 42d  | 18 |
| FBgn0042119 | 879.7   | 65  | 2 | YEISFTADETGYPK         | 42d  | 18 |
| FBgn0042119 | 880.08  | 57  | 2 | YEISFTADETGYPK         | 62d  | 18 |
| FBgn0042119 | 748.48  | 81  | 3 | YSFAYETSNGISR          | 62d  | 18 |
| FBgn0042119 | 879.98  | 71  | 2 | YEISFTADETGYPK         | 82d  | 18 |
| FBgn0042119 | 943.97  | 84  | 3 | KYEISFTADETGYPK        | 102d | 18 |
| FBgn0042119 | 1235.26 | 79  | 2 | LESENTGDKYSFAYETSNGISR | 102d | 18 |
| FBgn0042119 | 880.15  | 73  | 1 | YEISFTADETGYPK         | 102d | 18 |
| FBgn0042119 | 628.97  | 76  | 3 | KYEISFTADETGYPK        | 112d | 18 |
| FBgn0042119 | 1235.05 | 76  | 2 | LESENTGDKYSFAYETSNGISR | 112d | 18 |
| FBgn0042119 | 880.04  | 83  | 2 | YEISFTADETGYPK         | 112d | 18 |
| FBgn0042119 | 1234.91 | 56  | 1 | LESENTGDKYSFAYETSNGISR | 122d | 18 |
| FBgn0042119 | 748.48  | 77  | 2 | YSFAYETSNGISR          | 122d | 18 |
| FBgn0042119 | 628.87  | 68  | 2 | KYEISFTADETGYPK        | 132d | 18 |
| FBgn0042119 | 880.13  | 60  | 1 | YEISFTADETGYPK         | 132d | 18 |
| FBgn0042119 | 629.67  | 62  | 3 | KYEISFTADETGYPK        | 142d | 18 |
| FBgn0042119 | 1235.25 | 84  | 3 | LESENTGDKYSFAYETSNGISR | 142d | 18 |
| FBgn0042119 | 880.14  | 74  | 1 | YEISFTADETGYPK         | 142d | 18 |
| FBgn0042119 | 629.77  | 46  | 1 | KYEISFTADETGYPK        | 12d  | 28 |
| FBgn0042119 | 1235.05 | 77  | 3 | LESENTGDKYSFAYETSNGISR | 12d  | 28 |
| FBgn0042119 | 879.94  | 62  | 2 | YEISFTADETGYPK         | 12d  | 28 |
| FBgn0042119 | 943.79  | 79  | 3 | KYEISFTADETGYPK        | 22d  | 28 |
| FBgn0042119 | 879.8   | 71  | 2 | YEISFTADETGYPK         | 22d  | 28 |

|             |         |    |   |                        |      |    |
|-------------|---------|----|---|------------------------|------|----|
| FBgn0042119 | 629.75  | 65 | 2 | KYEISFTADEETGYHPK      | 32d  | 28 |
| FBgn0042119 | 1235.25 | 83 | 1 | LESENTGDKYSFAYETSNGISR | 32d  | 28 |
| FBgn0042119 | 879.99  | 80 | 3 | YEISFTADEETGYHPK       | 32d  | 28 |
| FBgn0042119 | 748.21  | 65 | 3 | YSFAYETSNGISR          | 32d  | 28 |
| FBgn0042119 | 629.79  | 63 | 1 | KYEISFTADEETGYHPK      | 36d  | 28 |
| FBgn0042119 | 879.82  | 86 | 3 | YEISFTADEETGYHPK       | 36d  | 28 |
| FBgn0042119 | 748.56  | 45 | 1 | YSFAYETSNGISR          | 36d  | 28 |
| FBgn0042119 | 629.72  | 73 | 2 | KYEISFTADEETGYHPK      | 42d  | 28 |
| FBgn0042119 | 823.74  | 44 | 1 | LESENTGDKYSFAYETSNGISR | 42d  | 28 |
| FBgn0042119 | 880.12  | 75 | 3 | YEISFTADEETGYHPK       | 42d  | 28 |
| FBgn0042119 | 748.46  | 77 | 3 | YSFAYETSNGISR          | 42d  | 28 |
| FBgn0042119 | 943.72  | 74 | 1 | KYEISFTADEETGYHPK      | 46d  | 28 |
| FBgn0042119 | 823.73  | 37 | 1 | LESENTGDKYSFAYETSNGISR | 46d  | 28 |
| FBgn0042119 | 880.08  | 63 | 3 | YEISFTADEETGYHPK       | 46d  | 28 |
| FBgn0042119 | 748.33  | 67 | 2 | YSFAYETSNGISR          | 46d  | 28 |
| FBgn0042119 | 943.92  | 60 | 2 | KYEISFTADEETGYHPK      | 50d  | 28 |
| FBgn0042119 | 880.11  | 69 | 2 | YEISFTADEETGYHPK       | 50d  | 28 |
| FBgn0042119 | 748.04  | 65 | 1 | YSFAYETSNGISR          | 50d  | 28 |
| FBgn0042119 | 944.07  | 67 | 3 | KYEISFTADEETGYHPK      | 52d  | 28 |
| FBgn0042119 | 879.92  | 74 | 3 | YEISFTADEETGYHPK       | 52d  | 28 |
| FBgn0042119 | 748.28  | 65 | 2 | YSFAYETSNGISR          | 52d  | 28 |
| FBgn0042119 | 629.74  | 51 | 1 | KYEISFTADEETGYHPK      | 56d  | 28 |
| FBgn0042138 | 878.38  | 77 | 2 | TLDIGGPEDEPGIQSAR      | 2d   | 18 |
| FBgn0042138 | 1238.48 | 64 | 1 | VNSDDVPIFQAAGDYDPVVPYK | 102d | 18 |
| FBgn0042138 | 1238.43 | 48 | 2 | VNSDDVPIFQAAGDYDPVVPYK | 112d | 18 |
| FBgn0042138 | 987.3   | 60 | 1 | TYSGLSHSSDDEMDDVK      | 122d | 18 |
| FBgn0042138 | 532.84  | 40 | 1 | FGQLSASLLK             | 2d   | 28 |
| FBgn0042138 | 878.23  | 91 | 2 | TLDIGGPEDEPGIQSAR      | 2d   | 28 |
| FBgn0042138 | 878.6   | 79 | 3 | TLDIGGPEDEPGIQSAR      | 12d  | 28 |
| FBgn0042138 | 1238.76 | 34 | 1 | VNSDDVPIFQAAGDYDPVVPYK | 22d  | 28 |
| FBgn0042138 | 878.32  | 97 | 3 | TLDIGGPEDEPGIQSAR      | 32d  | 28 |
| FBgn0042138 | 987.21  | 49 | 1 | TYSGLSHSSDDEMDDVK      | 32d  | 28 |

|             |         |     |   |                         |      |    |
|-------------|---------|-----|---|-------------------------|------|----|
| FBgn0042138 | 878.46  | 104 | 2 | TLDIGGPEDEPGIQSAR       | 36d  | 28 |
| FBgn0042138 | 878.25  | 75  | 2 | TLDIGGPEDEPGIQSAR       | 42d  | 28 |
| FBgn0042138 | 512.86  | 50  | 1 | MPSWFDLK                | 46d  | 28 |
| FBgn0042138 | 878.38  | 44  | 1 | TLDIGGPEDEPGIQSAR       | 46d  | 28 |
| FBgn0042138 | 878.47  | 78  | 2 | TLDIGGPEDEPGIQSAR       | 50d  | 28 |
| FBgn0042138 | 878.44  | 84  | 3 | TLDIGGPEDEPGIQSAR       | 52d  | 28 |
| FBgn0042138 | 987.16  | 97  | 3 | TYSGLSHSSDDEMDDVK       | 52d  | 28 |
| FBgn0042138 | 1238.49 | 47  | 1 | VNSDDVPIFQAHG DYDPVVPYK | 52d  | 28 |
| FBgn0042138 | 878.63  | 76  | 1 | TLDIGGPEDEPGIQSAR       | 56d  | 28 |
| FBgn0042645 | 968.56  | 63  | 1 | DTPTSVDLMGGASPSPTSK     | 102d | 18 |
| FBgn0042693 | 855.76  | 34  | 1 | DNTPPYDAPPPTPISK        | 62d  | 18 |
| FBgn0042693 | 855.77  | 72  | 1 | DNTPPYDAPPPTPISK        | 2d   | 28 |
| FBgn0043005 | 805.5   | 36  | 1 | SQNQAAVQLNAPGRR         | 142d | 18 |
| FBgn0043456 | 1003.73 | 66  | 3 | DVSGEALQDADEASSTPTGR    | 2d   | 18 |
| FBgn0043456 | 1003.95 | 61  | 3 | DVSGEALQDADEASSTPTGR    | 42d  | 18 |
| FBgn0043456 | 1004.18 | 78  | 2 | DVSGEALQDADEASSTPTGR    | 62d  | 18 |
| FBgn0043456 | 1003.94 | 87  | 1 | DVSGEALQDADEASSTPTGR    | 82d  | 18 |
| FBgn0043456 | 1003.87 | 76  | 1 | DVSGEALQDADEASSTPTGR    | 112d | 18 |
| FBgn0043456 | 1004.2  | 86  | 2 | DVSGEALQDADEASSTPTGR    | 122d | 18 |
| FBgn0043456 | 1003.85 | 76  | 1 | DVSGEALQDADEASSTPTGR    | 132d | 18 |
| FBgn0043456 | 1003.83 | 73  | 2 | DVSGEALQDADEASSTPTGR    | 2d   | 28 |
| FBgn0043456 | 1003.79 | 79  | 3 | DVSGEALQDADEASSTPTGR    | 12d  | 28 |
| FBgn0043456 | 1003.72 | 73  | 2 | DVSGEALQDADEASSTPTGR    | 56d  | 28 |
| FBgn0043782 | 866.69  | 54  | 1 | RPIYLIEQELSTLR          | 102d | 18 |
| FBgn0043782 | 997.7   | 41  | 1 | DLPTALALAQEVESNHER      | 112d | 18 |
| FBgn0043782 | 997.68  | 41  | 1 | DLPTALALAQEVESNHER      | 122d | 18 |
| FBgn0043782 | 997.51  | 55  | 2 | DLPTALALAQEVESNHER      | 132d | 18 |
| FBgn0044324 | 909.24  | 48  | 2 | VENSEAPAPVSPAPVPQK      | 42d  | 18 |
| FBgn0044324 | 909.47  | 37  | 1 | VENSEAPAPVSPAPVPQK      | 102d | 18 |
| FBgn0044324 | 909.63  | 37  | 1 | VENSEAPAPVSPAPVPQK      | 142d | 18 |
| FBgn0044343 | 998.34  | 41  | 2 | DMPALALALAQEVESNHER     | 132d | 18 |
| FBgn0044812 | 1174.79 | 44  | 1 | ILSPVAQGLAVGFFEELGGSLSR | 62d  | 18 |

|             |         |     |   |                            |      |    |
|-------------|---------|-----|---|----------------------------|------|----|
| FBgn0044812 | 1076.66 | 69  | 2 | SIQEHTDEILIDGVPSQGGR       | 112d | 18 |
| FBgn0044812 | 1076.51 | 39  | 1 | SIQEHTDEILIDGVPSQGGR       | 122d | 18 |
| FBgn0044812 | 1076.41 | 60  | 2 | SIQEHTDEILIDGVPSQGGR       | 132d | 18 |
| FBgn0044812 | 1174.76 | 40  | 1 | ILSPVAQGLAVGFFEELGGSLSR    | 142d | 18 |
| FBgn0044812 | 1076.44 | 60  | 1 | SIQEHTDEILIDGVPSQGGR       | 142d | 18 |
| FBgn0044812 | 568.22  | 42  | 1 | TQELLDIFR                  | 142d | 18 |
| FBgn0044812 | 1076.11 | 65  | 2 | SIQEHTDEILIDGVPSQGGR       | 2d   | 28 |
| FBgn0044812 | 1076.4  | 73  | 3 | SIQEHTDEILIDGVPSQGGR       | 36d  | 28 |
| FBgn0044812 | 1076.47 | 61  | 1 | SIQEHTDEILIDGVPSQGGR       | 42d  | 28 |
| FBgn0044812 | 1076.37 | 90  | 1 | SIQEHTDEILIDGVPSQGGR       | 46d  | 28 |
| FBgn0044812 | 1076.2  | 64  | 3 | SIQEHTDEILIDGVPSQGGR       | 50d  | 28 |
| FBgn0044812 | 1076.38 | 85  | 3 | SIQEHTDEILIDGVPSQGGR       | 52d  | 28 |
| FBgn0045828 | 801.51  | 38  | 1 | AANNAAGHGSNATDSSAPNATTATTK | 2d   | 18 |
| FBgn0046337 | 451.93  | 40  | 1 | VKLISSK                    | 2d   | 28 |
| FBgn0050000 | 720.33  | 47  | 1 | YYYDFLSQPSR                | 42d  | 18 |
| FBgn0050000 | 720.54  | 53  | 1 | YYYDFLSQPSR                | 112d | 18 |
| FBgn0050000 | 719.81  | 63  | 2 | YYYDFLSQPSR                | 122d | 18 |
| FBgn0050000 | 720.01  | 60  | 2 | YYYDFLSQPSR                | 142d | 18 |
| FBgn0050045 | 624.69  | 45  | 1 | GQAPGEPIPIIR               | 2d   | 18 |
| FBgn0050045 | 722.72  | 52  | 1 | QEQEVNFDGSYK               | 2d   | 18 |
| FBgn0050045 | 1032.46 | 46  | 2 | YLYETGNGINAEEEEGYLK        | 2d   | 18 |
| FBgn0050045 | 1032.3  | 57  | 1 | YLYETGNGINAEEEEGYLK        | 22d  | 18 |
| FBgn0050045 | 624.85  | 60  | 2 | GQAPGEPIPIIR               | 2d   | 28 |
| FBgn0050045 | 722.76  | 53  | 2 | QEQEVNFDGSYK               | 2d   | 28 |
| FBgn0050045 | 1032.32 | 96  | 3 | YLYETGNGINAEEEEGYLK        | 2d   | 28 |
| FBgn0050045 | 624.7   | 53  | 2 | GQAPGEPIPIIR               | 12d  | 28 |
| FBgn0050045 | 1332.81 | 80  | 2 | NPGTDNAGQVAQGSFYSPEGIPIR   | 12d  | 28 |
| FBgn0050045 | 722.88  | 38  | 1 | QEQEVNFDGSYK               | 12d  | 28 |
| FBgn0050045 | 1032.7  | 134 | 3 | YLYETGNGINAEEEEGYLK        | 12d  | 28 |
| FBgn0050045 | 1032.43 | 56  | 1 | YLYETGNGINAEEEEGYLK        | 32d  | 28 |
| FBgn0050045 | 625.01  | 42  | 1 | GQAPGEPIPIIR               | 36d  | 28 |
| FBgn0050045 | 1032.41 | 60  | 1 | YLYETGNGINAEEEEGYLK        | 36d  | 28 |



|             |         |     |   |                                  |      |    |
|-------------|---------|-----|---|----------------------------------|------|----|
| FBgn0050045 | 1032.34 | 95  | 1 | YLYETGNNGINAEEEGYLK              | 42d  | 28 |
| FBgn0050045 | 722.6   | 51  | 1 | QEQEVNFDGSYK                     | 46d  | 28 |
| FBgn0050045 | 1032.4  | 130 | 2 | YLYETGNNGINAEEEGYLK              | 46d  | 28 |
| FBgn0050045 | 1032.37 | 42  | 1 | YLYETGNNGINAEEEGYLK              | 50d  | 28 |
| FBgn0050045 | 1032.45 | 97  | 1 | YLYETGNNGINAEEEGYLK              | 52d  | 28 |
| FBgn0050054 | 493.29  | 47  | 1 | IIHSGYSDEDKR                     | 42d  | 18 |
| FBgn0050084 | 971.14  | 64  | 2 | VNAGSLSEQAGLQPGDAVVK             | 2d   | 18 |
| FBgn0050084 | 970.83  | 81  | 3 | VNAGSLSEQAGLQPGDAVVK             | 2d   | 28 |
| FBgn0050084 | 970.77  | 45  | 1 | VNAGSLSEQAGLQPGDAVVK             | 12d  | 28 |
| FBgn0050084 | 971.06  | 38  | 1 | VNAGSLSEQAGLQPGDAVVK             | 52d  | 28 |
| FBgn0050115 | 729.54  | 47  | 2 | DAQIVLDLLKNSK                    | 42d  | 18 |
| FBgn0050115 | 729.32  | 45  | 2 | DAQIVLDLLKNSK                    | 62d  | 18 |
| FBgn0050115 | 729.52  | 40  | 1 | DAQIVLDLLKNSK                    | 82d  | 18 |
| FBgn0050115 | 728.89  | 56  | 2 | DAQIVLDLLKNSK                    | 102d | 18 |
| FBgn0050115 | 729.07  | 41  | 1 | DAQIVLDLLKNSK                    | 112d | 18 |
| FBgn0050188 | 508.94  | 34  | 1 | NIQTSDAGLYKCR                    | 122d | 18 |
| FBgn0050263 | 661.32  | 35  | 1 | IIHHQHYRGRIAVLLR                 | 42d  | 28 |
| FBgn0050337 | 1223.37 | 61  | 1 | MQQQMQQQQAAQQAQQAAQQQSAAGAGGADPK | 42d  | 18 |
| FBgn0050337 | 860.15  | 58  | 1 | FQQQLELLVTELEK                   | 62d  | 18 |
| FBgn0050337 | 1223.34 | 64  | 1 | MQQQMQQQQAAQQAQQAAQQQSAAGAGGADPK | 102d | 18 |
| FBgn0050337 | 858.8   | 79  | 1 | LTYDYDNLQSQLDK                   | 112d | 18 |
| FBgn0050337 | 1223.32 | 74  | 1 | MQQQMQQQQAAQQAQQAAQQQSAAGAGGADPK | 122d | 18 |
| FBgn0050337 | 859.86  | 62  | 1 | FQQQLELLVTELEK                   | 2d   | 28 |
| FBgn0050337 | 859.14  | 65  | 2 | LTYDYDNLQSQLDK                   | 2d   | 28 |
| FBgn0050337 | 905.49  | 44  | 1 | ALQAAGPQQAQAAAAAGASR             | 12d  | 28 |
| FBgn0050337 | 995.1   | 38  | 1 | DRFQQQLELLVTELEK                 | 12d  | 28 |
| FBgn0050337 | 858.8   | 35  | 1 | LTYDYDNLQSQLDK                   | 12d  | 28 |
| FBgn0050420 | 778.86  | 60  | 2 | IDTPVPAPVPVEPPK                  | 42d  | 18 |
| FBgn0050466 | 780.96  | 36  | 2 | FNVTNLIQILKTR                    | 102d | 18 |
| FBgn0050492 | 1312.5  | 94  | 2 | TTDEVSDLSEIGSDIEESSDLLR          | 2d   | 18 |
| FBgn0050492 | 1312.55 | 100 | 3 | TTDEVSDLSEIGSDIEESSDLLR          | 62d  | 18 |
| FBgn0050492 | 1312.72 | 69  | 1 | TTDEVSDLSEIGSDIEESSDLLR          | 82d  | 18 |

|             |         |    |   |                                |      |    |
|-------------|---------|----|---|--------------------------------|------|----|
| FBgn0050492 | 1311.98 | 63 | 3 | TTDEVSDLSEIGSDIEESSDLLR        | 102d | 18 |
| FBgn0050492 | 1312.44 | 64 | 2 | TTDEVSDLSEIGSDIEESSDLLR        | 112d | 18 |
| FBgn0050492 | 1312.74 | 90 | 1 | TTDEVSDLSEIGSDIEESSDLLR        | 122d | 18 |
| FBgn0051150 | 1567.5  | 52 | 1 | SPQQQETLIAQAGTLLDSLAEAELETTEFK | 2d   | 18 |
| FBgn0051150 | 801.51  | 48 | 1 | IYEVYWPIFESR                   | 112d | 18 |
| FBgn0051155 | 648.6   | 38 | 1 | YFGPQLLETVK                    | 142d | 18 |
| FBgn0051205 | 768.11  | 42 | 1 | KFENDLAIHIELTK                 | 42d  | 28 |
| FBgn0051213 | 902.23  | 46 | 1 | DTNLVSDEGIQKEKVK               | 62d  | 18 |
| FBgn0051221 | 928.94  | 58 | 1 | RPPVEETASFLQSLIASHGPNYLEK      | 22d  | 18 |
| FBgn0051313 | 1426.13 | 34 | 1 | LATGDGPNYQVVNVISASSQLVAGSLYK   | 22d  | 18 |
| FBgn0051313 | 1426.99 | 52 | 1 | LATGDGPNYQVVNVISASSQLVAGSLYK   | 2d   | 28 |
| FBgn0051313 | 1426.67 | 41 | 1 | LATGDGPNYQVVNVISASSQLVAGSLYK   | 22d  | 28 |
| FBgn0051313 | 1426.75 | 54 | 1 | LATGDGPNYQVVNVISASSQLVAGSLYK   | 32d  | 28 |
| FBgn0051313 | 1426.82 | 80 | 2 | LATGDGPNYQVVNVISASSQLVAGSLYK   | 52d  | 28 |
| FBgn0051345 | 793.94  | 42 | 1 | NFEVGAPNPDGIVTR                | 22d  | 18 |
| FBgn0051510 | 743.64  | 39 | 1 | TQPTQNKKPAMGGK                 | 36d  | 28 |
| FBgn0051548 | 677.41  | 56 | 1 | IWSETLQQYGK                    | 122d | 18 |
| FBgn0051548 | 677.23  | 46 | 2 | IWSETLQQYGK                    | 36d  | 28 |
| FBgn0051548 | 677.47  | 84 | 3 | IWSETLQQYGK                    | 42d  | 28 |
| FBgn0051548 | 677.18  | 62 | 1 | IWSETLQQYGK                    | 46d  | 28 |
| FBgn0051617 | 983.93  | 42 | 3 | ASATPSHPPTQQMVDASIK            | 2d   | 18 |
| FBgn0051693 | 548.14  | 36 | 1 | IALLKGSLPGK                    | 62d  | 18 |
| FBgn0051693 | 548.29  | 35 | 1 | IALLKGSLPGK                    | 36d  | 28 |
| FBgn0051693 | 548.19  | 34 | 1 | IALLKGSLPGK                    | 46d  | 28 |
| FBgn0051739 | 1047.74 | 60 | 3 | ADPDEPSPSNPLASEAATPAR          | 102d | 18 |
| FBgn0051739 | 1047.7  | 55 | 1 | ADPDEPSPSNPLASEAATPAR          | 122d | 18 |
| FBgn0051822 | 880.7   | 35 | 1 | IVILLKRINLNPNLK                | 52d  | 28 |
| FBgn0051872 | 709.73  | 82 | 2 | FDDDLDEQPAPR                   | 82d  | 18 |
| FBgn0051878 | 947.23  | 64 | 2 | IVDYTADPLLGFNAQVR              | 2d   | 18 |
| FBgn0051878 | 580.32  | 37 | 3 | YSLVDPDGHR                     | 2d   | 18 |
| FBgn0051878 | 946.86  | 63 | 3 | IVDYTADPLLGFNAQVR              | 42d  | 18 |
| FBgn0051878 | 946.67  | 50 | 1 | IVDYTADPLLGFNAQVR              | 62d  | 18 |

|             |         |    |   |                                             |      |    |
|-------------|---------|----|---|---------------------------------------------|------|----|
| FBgn0051878 | 580.39  | 36 | 1 | YSLVDPDGHR                                  | 62d  | 18 |
| FBgn0051878 | 947.21  | 35 | 1 | IVDYTADPLLGFNAQVR                           | 102d | 18 |
| FBgn0051878 | 580.19  | 47 | 3 | YSLVDPDGHR                                  | 2d   | 28 |
| FBgn0051878 | 947.14  | 45 | 1 | IVDYTADPLLGFNAQVR                           | 12d  | 28 |
| FBgn0051878 | 580.29  | 37 | 1 | YSLVDPDGHR                                  | 12d  | 28 |
| FBgn0051878 | 947.04  | 73 | 3 | IVDYTADPLLGFNAQVR                           | 32d  | 28 |
| FBgn0051878 | 947.15  | 60 | 2 | IVDYTADPLLGFNAQVR                           | 42d  | 28 |
| FBgn0051878 | 946.45  | 54 | 3 | IVDYTADPLLGFNAQVR                           | 46d  | 28 |
| FBgn0051878 | 946.68  | 61 | 3 | IVDYTADPLLGFNAQVR                           | 52d  | 28 |
| FBgn0051878 | 946.91  | 83 | 3 | IVDYTADPLLGFNAQVR                           | 56d  | 28 |
| FBgn0052029 | 651.56  | 61 | 2 | DDEFTNYQNR                                  | 2d   | 18 |
| FBgn0052029 | 701.85  | 49 | 2 | GSYSVVDSDGFIR                               | 2d   | 18 |
| FBgn0052029 | 716.73  | 54 | 3 | AQQQQGYVAPSVR                               | 2d   | 28 |
| FBgn0052029 | 701.73  | 56 | 2 | GSYSVVDSDGFIR                               | 2d   | 28 |
| FBgn0052041 | 823.4   | 60 | 2 | WQEQEFAPPATVNK                              | 36d  | 28 |
| FBgn0052041 | 823.26  | 75 | 2 | WQEQEFAPPATVNK                              | 42d  | 28 |
| FBgn0052041 | 823.37  | 71 | 2 | WQEQEFAPPATVNK                              | 50d  | 28 |
| FBgn0052130 | 1306.12 | 38 | 1 | AASGAAPAPSATAPAVDTGAVAASEAAGQNAEPVTPQPQDATK | 2d   | 18 |
| FBgn0052230 | 690.17  | 45 | 2 | TSNPEPWQEYK                                 | 2d   | 18 |
| FBgn0052230 | 690.52  | 50 | 2 | TSNPEPWQEYK                                 | 22d  | 18 |
| FBgn0052230 | 690.44  | 41 | 2 | TSNPEPWQEYK                                 | 62d  | 18 |
| FBgn0052230 | 690.15  | 44 | 3 | TSNPEPWQEYK                                 | 2d   | 28 |
| FBgn0052230 | 690.27  | 42 | 1 | TSNPEPWQEYK                                 | 12d  | 28 |
| FBgn0052230 | 690.13  | 45 | 2 | TSNPEPWQEYK                                 | 22d  | 28 |
| FBgn0052230 | 690.54  | 53 | 3 | TSNPEPWQEYK                                 | 32d  | 28 |
| FBgn0052230 | 690.54  | 46 | 2 | TSNPEPWQEYK                                 | 46d  | 28 |
| FBgn0052230 | 690.42  | 46 | 1 | TSNPEPWQEYK                                 | 50d  | 28 |
| FBgn0052282 | 523.78  | 44 | 2 | VSGHCSASLK                                  | 112d | 18 |
| FBgn0052352 | 936.65  | 43 | 1 | TEIEAPTVEVTEPAEEK                           | 102d | 18 |
| FBgn0052377 | 820.96  | 59 | 1 | EATPSVTPVSTIPDVK                            | 142d | 18 |
| FBgn0052438 | 567.46  | 38 | 1 | NAKTQSDKLK                                  | 46d  | 28 |
| FBgn0052459 | 582.97  | 38 | 1 | LNQMEVEFR                                   | 22d  | 18 |

|             |         |    |   |                                  |      |    |
|-------------|---------|----|---|----------------------------------|------|----|
| FBgn0052543 | 1249.61 | 57 | 1 | VLVLEATTPVSAETATADPGENLAK        | 12d  | 28 |
| FBgn0052543 | 1249.82 | 38 | 1 | VLVLEATTPVSAETATADPGENLAK        | 42d  | 28 |
| FBgn0052544 | 1036.65 | 37 | 1 | LEHELAEQEAAEAVLLEQQDESLGNVGGK    | 42d  | 18 |
| FBgn0052544 | 1036.57 | 54 | 1 | LEHELAEQEAAEAVLLEQQDESLGNVGGK    | 2d   | 28 |
| FBgn0052544 | 1124.97 | 49 | 3 | SGSIASTQEERPPVQEQLAKPPPTAAEVSAAK | 12d  | 28 |
| FBgn0052549 | 853.02  | 40 | 1 | DVLYVGDHIFGDILK                  | 62d  | 18 |
| FBgn0052549 | 671.8   | 34 | 1 | AVDWVHSDGDLK                     | 50d  | 28 |
| FBgn0052549 | 853.1   | 61 | 1 | DVLYVGDHIFGDILK                  | 50d  | 28 |
| FBgn0052549 | 853.01  | 64 | 2 | DVLYVGDHIFGDILK                  | 52d  | 28 |
| FBgn0052626 | 793.34  | 92 | 1 | YETLLDELSNIFK                    | 42d  | 18 |
| FBgn0052626 | 793.17  | 82 | 3 | YETLLDELSNIFK                    | 82d  | 18 |
| FBgn0052626 | 793.29  | 40 | 1 | YETLLDELSNIFK                    | 12d  | 28 |
| FBgn0052626 | 793.19  | 94 | 2 | YETLLDELSNIFK                    | 36d  | 28 |
| FBgn0052626 | 793.22  | 76 | 1 | YETLLDELSNIFK                    | 42d  | 28 |
| FBgn0052626 | 793.56  | 77 | 1 | YETLLDELSNIFK                    | 46d  | 28 |
| FBgn0052626 | 793.46  | 73 | 1 | YETLLDELSNIFK                    | 50d  | 28 |
| FBgn0052685 | 687.35  | 34 | 1 | TNNKPNSIQNSR                     | 52d  | 28 |
| FBgn0052940 | 863.67  | 34 | 1 | VELLIEQNAQLEEAK                  | 2d   | 28 |
| FBgn0053105 | 1219.1  | 36 | 1 | LTELQLRIRQLLDQVEQITK             | 112d | 18 |
| FBgn0053113 | 703.61  | 57 | 3 | VQNIAGVAVAHINGFISELR             | 22d  | 18 |
| FBgn0053113 | 1055.28 | 63 | 2 | VQNIAGVAVAHINGFISELR             | 42d  | 18 |
| FBgn0053113 | 703.79  | 71 | 2 | VQNIAGVAVAHINGFISELR             | 62d  | 18 |
| FBgn0053113 | 788.85  | 37 | 1 | VVPVAPVESTQPQPK                  | 82d  | 18 |
| FBgn0053113 | 703.55  | 46 | 1 | VQNIAGVAVAHINGFISELR             | 112d | 18 |
| FBgn0053113 | 703.75  | 59 | 1 | VQNIAGVAVAHINGFISELR             | 122d | 18 |
| FBgn0053113 | 703.69  | 37 | 1 | VQNIAGVAVAHINGFISELR             | 2d   | 28 |
| FBgn0053113 | 789.08  | 43 | 3 | VVPVAPVESTQPQPK                  | 2d   | 28 |
| FBgn0053113 | 1055.31 | 58 | 1 | VQNIAGVAVAHINGFISELR             | 12d  | 28 |
| FBgn0053113 | 1055.2  | 60 | 1 | VQNIAGVAVAHINGFISELR             | 22d  | 28 |
| FBgn0053113 | 703.66  | 61 | 3 | VQNIAGVAVAHINGFISELR             | 36d  | 28 |
| FBgn0053113 | 703.79  | 54 | 3 | VQNIAGVAVAHINGFISELR             | 46d  | 28 |
| FBgn0053113 | 1055.15 | 49 | 1 | VQNIAGVAVAHINGFISELR             | 52d  | 28 |

|             |         |     |   |                               |      |    |
|-------------|---------|-----|---|-------------------------------|------|----|
| FBgn0053113 | 1055.12 | 64  | 1 | VQNIAGVAVAHINGFISELR          | 56d  | 28 |
| FBgn0053138 | 723.61  | 46  | 2 | LFNYVEYEVLR                   | 42d  | 18 |
| FBgn0053138 | 845.02  | 58  | 2 | WWHDEYNFDGYR                  | 62d  | 18 |
| FBgn0053138 | 723.08  | 56  | 2 | LFNYVEYEVLR                   | 112d | 18 |
| FBgn0053138 | 723.51  | 45  | 1 | LFNYVEYEVLR                   | 132d | 18 |
| FBgn0053138 | 657.32  | 38  | 1 | SNFIEVYTPSR                   | 132d | 18 |
| FBgn0053138 | 844.78  | 59  | 2 | WWHDEYNFDGYR                  | 132d | 18 |
| FBgn0053291 | 485.44  | 34  | 1 | IASGALALPR                    | 46d  | 28 |
| FBgn0053334 | 399.36  | 34  | 1 | DDEYVR                        | 32d  | 28 |
| FBgn0053334 | 399.23  | 35  | 1 | DDEYVR                        | 36d  | 28 |
| FBgn0053334 | 399.31  | 35  | 2 | DDEYVR                        | 46d  | 28 |
| FBgn0053493 | 399.6   | 36  | 1 | LVQAAPAK                      | 2d   | 28 |
| FBgn0058225 | 728.37  | 34  | 1 | IVKILGEGSSVTLIHTQIFK          | 112d | 18 |
| FBgn0058336 | 371     | 34  | 1 | EKKAHK                        | 2d   | 18 |
| FBgn0058336 | 371.36  | 44  | 2 | EKKAHK                        | 22d  | 18 |
| FBgn0058336 | 371.2   | 34  | 1 | EKKAHK                        | 22d  | 28 |
| FBgn0058336 | 371.4   | 34  | 1 | EKKAHK                        | 36d  | 28 |
| FBgn0058406 | 634.86  | 35  | 1 | LKLKIILIADK                   | 82d  | 18 |
| FBgn0058406 | 634.77  | 35  | 1 | LKLKIILIADK                   | 102d | 18 |
| FBgn0058406 | 634.86  | 35  | 2 | LKLKIILIADK                   | 112d | 18 |
| FBgn0062442 | 1133.13 | 50  | 1 | SSLPNYLSSLPVPSIGGWFK          | 62d  | 18 |
| FBgn0062442 | 1133.21 | 41  | 2 | SSLPNYLSSLPVPSIGGWFK          | 32d  | 28 |
| FBgn0062442 | 1133.13 | 43  | 1 | SSLPNYLSSLPVPSIGGWFK          | 50d  | 28 |
| FBgn0062442 | 1133.32 | 39  | 1 | SSLPNYLSSLPVPSIGGWFK          | 52d  | 28 |
| FBgn0063278 | 949.4   | 107 | 3 | KPFSTEPNNLASVSSYR             | 2d   | 18 |
| FBgn0063897 | 447.33  | 35  | 1 | LEIAYKR                       | 12d  | 28 |
| FBgn0064128 | 1249.49 | 94  | 2 | DMNNQADSLVESGQFDTAGIQEK       | 2d   | 18 |
| FBgn0064128 | 1615.5  | 47  | 1 | ALGYDLPMVEEGQPDPEFEAILDVVDPNR | 2d   | 28 |
| FBgn0064128 | 1249.53 | 93  | 2 | DMNNQADSLVESGQFDTAGIQEK       | 2d   | 28 |
| FBgn0064128 | 1127.98 | 34  | 1 | DLDFWLGEVESLLTTEDSGK          | 12d  | 28 |
| FBgn0064128 | 1249.58 | 93  | 3 | DMNNQADSLVESGQFDTAGIQEK       | 12d  | 28 |
| FBgn0064128 | 1249.55 | 59  | 1 | DMNNQADSLVESGQFDTAGIQEK       | 56d  | 28 |

|             |        |     |   |               |      |    |
|-------------|--------|-----|---|---------------|------|----|
| FBgn0064779 | 760.29 | 49  | 2 | LDKSENFDEYMK  | 2d   | 18 |
| FBgn0064779 | 740.99 | 111 | 2 | LGVEFDEETLDGR | 2d   | 18 |
| FBgn0064779 | 582.07 | 49  | 2 | SENFDEYMK     | 2d   | 18 |
| FBgn0064779 | 472.65 | 63  | 3 | ELGVGLVTR     | 22d  | 18 |
| FBgn0064779 | 741.06 | 104 | 3 | LGVEFDEETLDGR | 22d  | 18 |
| FBgn0064779 | 582.26 | 47  | 3 | SENFDEYMK     | 22d  | 18 |
| FBgn0064779 | 472.6  | 48  | 2 | ELGVGLVTR     | 42d  | 18 |
| FBgn0064779 | 740.76 | 111 | 3 | LGVEFDEETLDGR | 42d  | 18 |
| FBgn0064779 | 582.11 | 47  | 3 | SENFDEYMK     | 42d  | 18 |
| FBgn0064779 | 472.85 | 40  | 1 | ELGVGLVTR     | 62d  | 18 |
| FBgn0064779 | 494.46 | 43  | 2 | GDKPTTIVR     | 62d  | 18 |
| FBgn0064779 | 740.78 | 97  | 1 | LGVEFDEETLDGR | 62d  | 18 |
| FBgn0064779 | 582.25 | 47  | 1 | SENFDEYMK     | 62d  | 18 |
| FBgn0064779 | 480.98 | 44  | 2 | SIITLDGNK     | 62d  | 18 |
| FBgn0064779 | 472.98 | 37  | 1 | ELGVGLVTR     | 82d  | 18 |
| FBgn0064779 | 740.87 | 110 | 1 | LGVEFDEETLDGR | 82d  | 18 |
| FBgn0064779 | 740.77 | 91  | 4 | LGVEFDEETLDGR | 102d | 18 |
| FBgn0064779 | 740.87 | 74  | 1 | LGVEFDEETLDGR | 112d | 18 |
| FBgn0064779 | 582.4  | 50  | 1 | SENFDEYMK     | 122d | 18 |
| FBgn0064779 | 472.87 | 35  | 1 | ELGVGLVTR     | 132d | 18 |
| FBgn0064779 | 472.56 | 55  | 3 | ELGVGLVTR     | 2d   | 28 |
| FBgn0064779 | 741    | 93  | 3 | LGVEFDEETLDGR | 2d   | 28 |
| FBgn0064779 | 582.02 | 45  | 3 | SENFDEYMK     | 2d   | 28 |
| FBgn0064779 | 481.16 | 41  | 1 | SIITLDGNK     | 2d   | 28 |
| FBgn0064779 | 472.78 | 59  | 2 | ELGVGLVTR     | 12d  | 28 |
| FBgn0064779 | 760.25 | 45  | 1 | LDKSENFDEYMK  | 12d  | 28 |
| FBgn0064779 | 741.06 | 111 | 3 | LGVEFDEETLDGR | 12d  | 28 |
| FBgn0064779 | 582.07 | 48  | 2 | SENFDEYMK     | 12d  | 28 |
| FBgn0064779 | 740.86 | 110 | 3 | LGVEFDEETLDGR | 22d  | 28 |
| FBgn0064779 | 582.17 | 46  | 2 | SENFDEYMK     | 22d  | 28 |
| FBgn0064779 | 472.47 | 42  | 3 | ELGVGLVTR     | 32d  | 28 |
| FBgn0064779 | 494.06 | 39  | 1 | GDKPTTIVR     | 32d  | 28 |

|             |        |     |   |                      |      |    |
|-------------|--------|-----|---|----------------------|------|----|
| FBgn0064779 | 740.71 | 111 | 3 | LGVEFDEETLDGR        | 32d  | 28 |
| FBgn0064779 | 582.26 | 47  | 3 | SENFDEYMK            | 32d  | 28 |
| FBgn0064779 | 472.93 | 47  | 3 | ELGVGLVTR            | 36d  | 28 |
| FBgn0064779 | 740.74 | 111 | 4 | LGVEFDEETLDGR        | 36d  | 28 |
| FBgn0064779 | 582.15 | 48  | 3 | SENFDEYMK            | 36d  | 28 |
| FBgn0064779 | 472.65 | 48  | 3 | ELGVGLVTR            | 42d  | 28 |
| FBgn0064779 | 740.98 | 111 | 1 | LGVEFDEETLDGR        | 42d  | 28 |
| FBgn0064779 | 582.48 | 44  | 3 | SENFDEYMK            | 42d  | 28 |
| FBgn0064779 | 481.52 | 40  | 2 | SIITLDGNK            | 42d  | 28 |
| FBgn0064779 | 740.84 | 111 | 3 | LGVEFDEETLDGR        | 46d  | 28 |
| FBgn0064779 | 582.36 | 44  | 2 | SENFDEYMK            | 46d  | 28 |
| FBgn0064779 | 472.86 | 35  | 1 | ELGVGLVTR            | 50d  | 28 |
| FBgn0064779 | 740.62 | 90  | 2 | LGVEFDEETLDGR        | 50d  | 28 |
| FBgn0064779 | 582.14 | 44  | 2 | SENFDEYMK            | 50d  | 28 |
| FBgn0064779 | 740.42 | 90  | 1 | LGVEFDEETLDGR        | 52d  | 28 |
| FBgn0064779 | 581.95 | 47  | 2 | SENFDEYMK            | 52d  | 28 |
| FBgn0064779 | 739.17 | 60  | 1 | TSAISFKLGVEFDEETLDGR | 52d  | 28 |
| FBgn0064779 | 493.97 | 43  | 1 | GDKPTTIVR            | 56d  | 28 |
| FBgn0064779 | 740.98 | 111 | 6 | LGVEFDEETLDGR        | 56d  | 28 |
| FBgn0066365 | 358.24 | 34  | 1 | MGHLTR               | 46d  | 28 |
| FBgn0067933 | 588.97 | 38  | 2 | YIGDEFEFR            | 112d | 18 |
| FBgn0067959 | 795.87 | 76  | 2 | VELTPPTPADIPAIR      | 2d   | 18 |
| FBgn0067959 | 795.98 | 57  | 2 | VELTPPTPADIPAIR      | 42d  | 18 |
| FBgn0067959 | 795.62 | 48  | 1 | VELTPPTPADIPAIR      | 62d  | 18 |
| FBgn0067959 | 796.12 | 55  | 2 | VELTPPTPADIPAIR      | 102d | 18 |
| FBgn0067959 | 796.17 | 41  | 1 | VELTPPTPADIPAIR      | 142d | 18 |
| FBgn0067959 | 795.86 | 57  | 1 | VELTPPTPADIPAIR      | 2d   | 28 |
| FBgn0067959 | 795.81 | 44  | 1 | VELTPPTPADIPAIR      | 32d  | 28 |
| FBgn0067959 | 795.97 | 54  | 2 | VELTPPTPADIPAIR      | 36d  | 28 |
| FBgn0067959 | 795.86 | 41  | 2 | VELTPPTPADIPAIR      | 46d  | 28 |
| FBgn0067959 | 795.96 | 54  | 1 | VELTPPTPADIPAIR      | 56d  | 28 |
| FBgn0068057 | 563.43 | 55  | 1 | HGYIGEFEIVDDHR       | 2d   | 18 |

|             |         |    |   |                          |      |    |
|-------------|---------|----|---|--------------------------|------|----|
| FBgn0068082 | 807.5   | 56 | 1 | HSGNIGFEDILAIAR          | 2d   | 18 |
| FBgn0068082 | 807.28  | 36 | 1 | HSGNIGFEDILAIAR          | 2d   | 28 |
| FBgn0068082 | 807.52  | 48 | 1 | HSGNIGFEDILAIAR          | 56d  | 28 |
| FBgn0068089 | 1264.81 | 34 | 1 | KGPAPLNLEVPTHEFPNEGLLVVG | 102d | 18 |
| FBgn0068089 | 1264.62 | 41 | 1 | KGPAPLNLEVPTHEFPNEGLLVVG | 142d | 18 |
| FBgn0068108 | 657.7   | 53 | 1 | NLIFPNEPDVR              | 2d   | 18 |
| FBgn0068108 | 657.83  | 35 | 1 | NLIFPNEPDVR              | 82d  | 18 |
| FBgn0068108 | 743.81  | 38 | 1 | ENPLSNDQISQLK            | 102d | 18 |
| FBgn0068108 | 657.91  | 39 | 2 | NLIFPNEPDVR              | 142d | 18 |
| FBgn0068108 | 657.68  | 40 | 1 | NLIFPNEPDVR              | 52d  | 28 |
| FBgn0068150 | 684.09  | 35 | 2 | AITFPLFWENK              | 102d | 18 |
| FBgn0068150 | 683.75  | 42 | 1 | AITFPLFWENK              | 122d | 18 |
| FBgn0068253 | 937.86  | 78 | 3 | VGDSLPAVDLFDSPANK        | 56d  | 28 |
| FBgn0068253 | 826.18  | 34 | 1 | VIIFGVPGAFTPGCSK         | 56d  | 28 |
| FBgn0068439 | 1024.27 | 88 | 2 | VTSISPGLVDTELVLPLDYK     | 102d | 18 |
| FBgn0068574 | 706.14  | 53 | 2 | EFTLEEEEEKK              | 2d   | 18 |
| FBgn0068574 | 857.48  | 47 | 1 | AQEINDLNAQVNDLR          | 2d   | 28 |
| FBgn0069973 | 1023.93 | 54 | 1 | VTSISPGLVDTELVLPLDYK     | 2d   | 28 |
| gi 41615478 | 543.48  | 44 | 1 | KVGINKNLAK               | 36d  | 28 |
| gi 41615478 | 543.18  | 37 | 1 | KVGINKNLAK               | 42d  | 28 |
| gi 41615478 | 543.15  | 41 | 1 | KVGINKNLAK               | 50d  | 28 |
| gi 41615528 | 502.7   | 39 | 1 | MAAIWPWHATPPK            | 50d  | 28 |
| gi 41615540 | 509.13  | 49 | 1 | SLLDLVSNR                | 82d  | 18 |
| gi 41615714 | 680.5   | 35 | 2 | MLDLTQVPAKDK             | 2d   | 28 |
| gi 41616018 | 960.77  | 37 | 1 | NTNALEALQILVHEVQK        | 82d  | 18 |
| gi 41616502 | 373.04  | 45 | 1 | NKNIKK                   | 36d  | 28 |
| gi 41616886 | 476.97  | 34 | 1 | FVSRWTR                  | 32d  | 28 |
| gi 41617000 | 759.62  | 35 | 1 | ELLGIFFLRLLLLVLNFNK      | 2d   | 18 |
| gi 41617000 | 759.11  | 35 | 1 | ELLGIFFLRLLLLVLNFNK      | 56d  | 28 |
| gi 41618010 | 782.6   | 37 | 1 | DCDCDWDWNFLFLWQAR        | 50d  | 28 |
| gi 41618422 | 596.9   | 38 | 1 | SSNEILMQIAGVVSAGR        | 42d  | 18 |
| gi 41618780 | 475.39  | 34 | 1 | CLKTGFATIEQR             | 36d  | 28 |



|             |        |    |   |                            |      |    |
|-------------|--------|----|---|----------------------------|------|----|
| gi 41619460 | 944.52 | 34 | 1 | NAVTAASTANGGDKETLYAALFQQYR | 22d  | 18 |
| gi 41619460 | 944.54 | 37 | 1 | NAVTAASTANGGDKETLYAALFQQYR | 62d  | 18 |
| gi 41619662 | 545.63 | 37 | 1 | NTVPDTMSAR                 | 132d | 18 |
| gi 41619944 | 373.05 | 39 | 1 | AGRAEIK                    | 56d  | 28 |
| gi 42519923 | 954.4  | 36 | 1 | ISTSSTIEPFVIEIDKK          | 112d | 18 |
| gi 42519927 | 909.96 | 42 | 1 | KKITVYVGLTPDNLTR           | 12d  | 28 |
| gi 42519941 | 538.92 | 34 | 1 | SNVTSDLVDK                 | 42d  | 18 |
| gi 42520087 | 471.21 | 36 | 1 | LILGRGSPK                  | 46d  | 28 |
| gi 42520100 | 487.31 | 38 | 1 | AELIQAEAK                  | 12d  | 28 |
| gi 42520136 | 629.42 | 34 | 1 | IVVNDRKNGK                 | 42d  | 28 |
| gi 42520178 | 513.25 | 34 | 1 | LLVANGANVR                 | 112d | 18 |
| gi 42520197 | 619.79 | 36 | 1 | KVLENEALLEATAQAEK          | 42d  | 18 |
| gi 42520230 | 510.15 | 37 | 1 | LSNITSKKK                  | 46d  | 28 |
| gi 42520291 | 391.77 | 38 | 1 | SGKGPILLEMK                | 46d  | 28 |
| gi 42520357 | 705.07 | 42 | 1 | DIVPGIKILAGEGYIPAGGGSK     | 56d  | 28 |
| gi 42520369 | 585.97 | 36 | 1 | LDFYVSANGGK                | 132d | 18 |
| gi 42520375 | 366.12 | 36 | 1 | LIDIEK                     | 42d  | 28 |
| gi 42520375 | 366.08 | 36 | 1 | LIDIEK                     | 50d  | 28 |
| gi 42520412 | 398.64 | 48 | 1 | YALTISK                    | 32d  | 28 |
| gi 42520412 | 398.74 | 48 | 1 | YALTISK                    | 42d  | 28 |
| gi 42520412 | 398.63 | 48 | 3 | YALTISK                    | 46d  | 28 |
| gi 42520412 | 398.9  | 48 | 2 | YALTISK                    | 52d  | 28 |
| gi 42520562 | 651.64 | 35 | 1 | AFILGGIQLTISAVFSCR         | 82d  | 18 |
| gi 42520637 | 439.93 | 40 | 1 | FWEKCFSSAR                 | 82d  | 18 |
| gi 42520713 | 523.65 | 44 | 1 | VMQGAQKGAR                 | 112d | 18 |
| gi 42520786 | 958.44 | 34 | 1 | VGNENSGLVQSLNNLQTK         | 2d   | 28 |
| gi 42520851 | 603.29 | 40 | 1 | KDALISNLIDSQTFSR           | 132d | 18 |
| gi 42520888 | 445.35 | 37 | 1 | EIEELKK                    | 112d | 18 |
| gi 42520909 | 674.31 | 34 | 1 | IGLLFAVLLFLCGSDALAK        | 22d  | 28 |
| gi 42520909 | 674.48 | 37 | 1 | IGLLFAVLLFLCGSDALAK        | 46d  | 28 |
| gi 42520952 | 368.59 | 35 | 1 | FIEKAK                     | 22d  | 18 |
| gi 42521105 | 863.17 | 38 | 1 | LDNYISRNFQKIVK             | 22d  | 28 |

gi|632783 993.97 43 1

YVPEGNLTSCGIDYLER

50d

28

---

<sup>a</sup> Complete list of unique proteins and peptide sequences identified from SCX LC-MS/MS experiments across all ages at 18 and 28 °C.

<sup>b</sup> The Flybase gene number (FBgn no.) was obtained from Flybase and gi| accessions from the NCBI database are listed when FBgn no. was unavailable.

<sup>c</sup> Representative m/z value obtained for the peptide sequence at any one age across triplicate experiments for all SCX fractions.

<sup>d</sup> Maximum value for the MASCOT score obtained for the peptide sequence across all replicate SCX analyses.

<sup>e</sup> The total number of peptide hits observed for each peptide sequence across replicate analyses of all SCX fractions.

<sup>f</sup> Peptide sequence is provided at least once for each age and experiment that it was observed.

<sup>g</sup> Age is provided in days since eclosure.

<sup>h</sup> The experiment in which the assignment was made in either the 18 or 28 °C datasets.
