# Supplementary material
Source: PubMed Central journal article supplement (PMC2949476)
Supplement: NIHMS232210-supplement-02.pdf [file NIHMS232210-supplement-02.pdf]

Table SII. Peptide hits for top 102 proteins in order of decreasing abundance based on peptide hits across both temperature datasets.<sup>a</sup>

| FBgn no. <sup>b</sup> | $\Sigma$ Hits <sup>c</sup> | 18 °C          |    |    |     |     |     |     |     |     |     | 28 °C |     |    |    |     |     |    |    |    |    |
|-----------------------|----------------------------|----------------|----|----|-----|-----|-----|-----|-----|-----|-----|-------|-----|----|----|-----|-----|----|----|----|----|
|                       |                            | 2 <sup>d</sup> | 22 | 42 | 62  | 82  | 102 | 112 | 122 | 132 | 142 | 2     | 12  | 22 | 32 | 36  | 42  | 46 | 50 | 52 | 56 |
| FBgn0002741           | 1898                       | 131            | 97 | 97 | 117 | 115 | 71  | 63  | 49  | 50  | 65  | 143   | 120 | 89 | 98 | 111 | 135 | 97 | 96 | 85 | 69 |
| FBgn0010217           | 967                        | 57             | 38 | 65 | 54  | 50  | 30  | 36  | 44  | 45  | 39  | 60    | 68  | 40 | 50 | 57  | 50  | 53 | 52 | 35 | 44 |
| FBgn0016724           | 763                        | 54             | 27 | 30 | 28  | 27  | 17  | 29  | 18  | 19  | 20  | 77    | 43  | 30 | 38 | 57  | 66  | 53 | 35 | 51 | 44 |
| FBgn0000055           | 735                        | 44             | 33 | 56 | 42  | 29  | 28  | 29  | 39  | 21  | 32  | 39    | 50  | 22 | 39 | 41  | 45  | 46 | 38 | 31 | 31 |
| FBgn0011211           | 655                        | 28             | 26 | 27 | 36  | 32  | 28  | 28  | 32  | 22  | 21  | 34    | 45  | 28 | 37 | 35  | 46  | 32 | 38 | 36 | 44 |
| FBgn0000116           | 633                        | 33             | 32 | 29 | 22  | 25  | 23  | 23  | 22  | 18  | 21  | 46    | 39  | 23 | 39 | 39  | 41  | 43 | 37 | 41 | 37 |
| FBgn0002921           | 532                        | 40             | 25 | 49 | 24  | 26  | 17  | 16  | 17  | 13  | 9   | 58    | 44  | 21 | 32 | 14  | 30  | 30 | 34 | 19 | 14 |
| FBgn0000579           | 532                        | 25             | 27 | 36 | 31  | 23  | 21  | 18  | 24  | 21  | 13  | 38    | 31  | 20 | 30 | 27  | 30  | 30 | 33 | 25 | 29 |
| FBgn0000064           | 519                        | 27             | 18 | 29 | 31  | 16  | 24  | 19  | 16  | 18  | 18  | 44    | 36  | 14 | 36 | 29  | 37  | 33 | 27 | 21 | 26 |
| FBgn0027580           | 501                        | 14             | 21 | 34 | 15  | 21  | 24  | 21  | 11  | 10  | 14  | 21    | 28  | 20 | 28 | 37  | 45  | 37 | 34 | 35 | 31 |
| FBgn0027571           | 426                        | 21             | 19 | 26 | 20  | 14  | 15  | 12  | 13  | 9   | 8   | 37    | 33  | 14 | 18 | 36  | 34  | 27 | 23 | 22 | 25 |
| FBgn0003149           | 406                        | 41             | 28 | 26 | 18  | 20  | 13  | 7   | 8   | 18  | 13  | 37    | 32  | 9  | 20 | 16  | 32  | 12 | 20 | 24 | 12 |
| FBgn0010100           | 389                        | 27             | 22 | 19 | 18  | 15  | 14  | 10  | 17  | 10  | 12  | 30    | 28  | 21 | 21 | 22  | 26  | 21 | 26 | 16 | 14 |
| FBgn0003884           | 350                        | 25             | 15 | 31 | 14  | 16  | 13  | 12  | 13  | 16  | 12  | 26    | 23  | 10 | 14 | 15  | 23  | 15 | 21 | 16 | 20 |
| FBgn0002938           | 333                        | 28             | 7  | 22 | 13  | 15  | 9   | 10  | 6   | 10  | 13  | 50    | 29  | 3  | 17 | 19  | 24  | 18 | 16 | 11 | 13 |
| FBgn0037138           | 327                        | 9              | 15 | 26 | 15  | 15  | 16  | 14  | 8   | 11  | 5   | 13    | 15  | 6  | 24 | 28  | 19  | 26 | 21 | 20 | 21 |
| FBgn0037146           | 317                        | 4              | 11 | 12 | 17  | 15  | 9   | 9   | 8   | 12  | 9   | 14    | 27  | 15 | 21 | 22  | 25  | 29 | 28 | 18 | 12 |
| FBgn0038587           | 317                        | 16             | 11 | 15 | 14  | 14  | 13  | 13  | 14  | 11  | 14  | 28    | 27  | 10 | 17 | 20  | 19  | 14 | 13 | 12 | 22 |
| FBgn0005664           | 301                        | 46             | 8  | 9  | 36  | 23  | 7   | 7   | 5   | 4   | 8   | 46    | 25  | 5  | 7  | 11  | 16  | 12 | 9  | 7  | 10 |
| FBgn0012036           | 297                        | 8              | 13 | 20 | 12  | 14  | 12  | 12  | 12  | 8   | 12  | 18    | 12  | 8  | 22 | 24  | 29  | 14 | 20 | 16 | 11 |
| FBgn0004507           | 267                        | 24             | 15 | 17 | 17  | 21  | 12  | 9   | 12  | 8   | 4   | 36    | 26  | 6  | 13 | 7   | 8   | 5  | 12 | 8  | 7  |
| FBgn0004907           | 261                        | 12             | 12 | 16 | 13  | 8   | 12  | 5   | 12  | 5   | 7   | 27    | 13  | 7  | 19 | 17  | 17  | 14 | 17 | 12 | 16 |
| FBgn0003721           | 261                        | 26             | 14 | 14 | 11  | 15  | 8   | 9   | 10  | 2   | 12  | 24    | 24  | 10 | 16 | 18  | 16  | 8  | 10 | 9  | 5  |
| FBgn0026708           | 258                        | 14             | 15 | 22 | 12  | 12  | 9   | 9   | 9   | 5   | 8   | 19    | 12  | 7  | 13 | 13  | 22  | 15 | 15 | 13 | 14 |
| FBgn0001098           | 256                        | 18             | 16 | 10 | 10  | 8   | 9   | 7   | 6   | 10  | 10  | 23    | 21  | 10 | 17 | 11  | 23  | 10 | 17 | 10 | 10 |
| FBgn0002773           | 251                        | 16             | 11 | 12 | 16  | 16  | 14  | 8   | 8   | 14  | 7   | 13    | 15  | 11 | 15 | 12  | 8   | 14 | 12 | 17 | 12 |
| FBgn0003471           | 240                        | 30             | 16 | 16 | 10  | 8   | 8   | 6   | 6   | 11  | 5   | 34    | 20  | 5  | 3  | 10  | 13  | 7  | 15 | 8  | 9  |
| FBgn0011693           | 240                        | 11             | 20 | 18 | 13  | 8   | 6   | 7   | 9   | 14  | 7   | 21    | 15  | 5  | 13 | 15  | 21  | 13 | 15 | 5  | 4  |
| FBgn0028479           | 232                        | 10             | 5  | 17 | 10  | 10  | 4   | 14  | 2   | 2   | 3   | 10    | 15  | 2  | 15 | 23  | 25  | 24 | 16 | 16 | 9  |

|             |     |    |    |    |    |    |    |    |    |    |    |    |    |    |    |    |    |    |    |    |    |
|-------------|-----|----|----|----|----|----|----|----|----|----|----|----|----|----|----|----|----|----|----|----|----|
| FBgn0027291 | 224 | 10 | 9  | 15 | 12 | 11 | 8  | 12 | 10 | 3  | 10 | 10 | 17 | 11 | 13 | 10 | 17 | 10 | 10 | 15 | 11 |
| FBgn0001219 | 221 | 14 | 6  | 6  | 2  | 8  | 11 | 7  | 6  | 6  | 12 | 22 | 13 | 1  | 15 | 13 | 26 | 13 | 13 | 15 | 12 |
| FBgn0039737 | 212 | 5  | 2  | 10 | 6  | 3  | 10 | 6  | 10 | 6  | 6  | 13 | 9  | 7  | 9  | 18 | 26 | 25 | 15 | 12 | 14 |
| FBgn0005671 | 201 | 10 | 7  | 18 | 10 | 8  | 13 | 9  | 12 | 8  | 5  | 16 | 15 | 1  | 8  | 9  | 15 | 4  | 9  | 10 | 14 |
| FBgn0003178 | 200 | 18 | 13 | 15 | 16 | 16 | 10 | 3  | 7  | 4  | 4  | 10 | 16 | 9  | 11 | 9  | 10 | 9  | 5  | 10 | 5  |
| FBgn0037643 | 199 | 7  | 10 | 6  | 8  | 13 | 5  | 7  | 9  | 8  | 7  | 10 | 10 | 8  | 15 | 15 | 16 | 10 | 12 | 14 | 9  |
| FBgn0010352 | 198 | 10 | 11 | 10 | 8  | 6  | 9  | 7  | 10 | 5  | 12 | 13 | 15 | 8  | 10 | 16 | 13 | 9  | 9  | 11 | 6  |
| FBgn0003470 | 195 | 34 | 3  | 7  | 10 | 3  | 6  | 8  | 6  | 7  | 3  | 33 | 22 | 3  | 9  | 8  | 12 | 2  | 6  | 7  | 6  |
| FBgn0040813 | 192 | 11 | 9  | 6  | 14 | 11 | 8  | 8  | 8  | 11 | 4  | 14 | 14 | 8  | 7  | 11 | 10 | 14 | 11 | 7  | 6  |
| FBgn0000253 | 191 | 15 | 9  | 13 | 8  | 7  | 6  | 9  | 7  | 8  | 10 | 13 | 12 | 8  | 11 | 8  | 13 | 5  | 9  | 12 | 8  |
| FBgn0001248 | 191 | 9  | 4  | 15 | 12 | 8  | 8  | 6  | 7  | 4  | 10 | 14 | 10 | 7  | 12 | 11 | 12 | 10 | 13 | 12 | 7  |
| FBgn0022355 | 190 | 8  | 5  | 7  | 7  | 11 | 7  | 4  | 12 | 8  | 12 | 11 | 15 | 2  | 10 | 9  | 17 | 8  | 8  | 19 | 10 |
| FBgn0004169 | 190 | 17 | 8  | 11 | 5  | 8  | 8  | 6  | 8  | 4  | 6  | 18 | 16 | 12 | 9  | 9  | 9  | 11 | 14 | 6  | 5  |
| FBgn0036642 | 187 | 16 | 11 | 13 | 7  | 6  | 11 | 9  | 6  | 6  | 6  | 16 | 9  | 8  | 8  | 10 | 11 | 9  | 8  | 9  | 8  |
| FBgn0000121 | 178 | 12 | 8  | 8  | 12 | 4  | 3  | 15 | 8  | 5  | 3  | 19 | 14 | 3  | 9  | 7  | 18 | 6  | 10 | 4  | 10 |
| FBgn0036927 | 174 | 9  | 6  | 12 | 8  | 6  | 3  | 9  | 5  | 7  | 9  | 13 | 6  | 5  | 12 | 12 | 9  | 10 | 11 | 10 | 12 |
| FBgn0040064 | 169 | 6  | 4  | 14 | 2  | 8  | 7  | 3  | 4  | 6  | 5  | 11 | 12 | 10 | 10 | 15 | 13 | 10 | 11 | 8  | 10 |
| FBgn0001128 | 163 | 9  | 7  | 12 | 6  | 7  | 6  | 7  | 6  | 8  | 7  | 17 | 14 | 7  | 7  | 10 | 5  | 5  | 9  | 7  | 7  |
| FBgn0035811 | 162 | 5  | 13 | 10 | 7  | 6  | 2  | 4  | 5  | 1  | 3  | 3  | 18 | 8  | 14 | 13 | 16 | 12 | 6  | 12 | 4  |
| FBgn0001091 | 161 | 2  | 9  | 4  | 6  | 8  | 7  | 20 | 7  | 9  | 8  | 3  | 9  | 5  | 7  | 12 | 7  | 13 | 13 | 1  | 11 |
| FBgn0000667 | 160 | 14 | 7  | 10 | 9  | 3  | 5  | 5  | 7  | 7  | 9  | 12 | 19 | 6  | 3  | 8  | 6  | 5  | 5  | 6  | 14 |
| FBgn0020238 | 156 | 17 | 5  | 6  | 8  | 7  | 6  | 6  | 3  | 4  | 5  | 22 | 12 | 1  | 9  | 8  | 4  | 10 | 12 | 5  | 6  |
| FBgn0000634 | 152 | 7  | 9  | 10 | 8  | 7  | 3  | 4  | 5  | 4  | 7  | 12 | 15 | 6  | 10 | 6  | 10 | 10 | 7  | 7  | 5  |
| FBgn0016119 | 149 | 7  | 9  | 10 | 10 | 7  | 5  | 3  | 8  | 4  | 7  | 16 | 11 | 8  | 10 | 5  | 5  | 4  | 6  | 5  | 9  |
| FBgn0030478 | 149 | 9  | 5  | 6  | 7  | 10 | 5  | 5  | 6  | 5  | 3  | 7  | 5  | 7  | 13 | 8  | 9  | 15 | 7  | 10 | 7  |
| FBgn0001090 | 138 | 17 | 0  | 1  | 2  | 5  | 2  | 4  | 5  | 1  | 1  | 40 | 24 | 0  | 7  | 5  | 6  | 0  | 6  | 8  | 4  |
| FBgn0003887 | 138 | 13 | 6  | 7  | 2  | 7  | 7  | 6  | 6  | 2  | 3  | 15 | 6  | 3  | 8  | 10 | 8  | 7  | 7  | 7  | 8  |
| FBgn0028342 | 130 | 3  | 7  | 10 | 8  | 9  | 3  | 0  | 1  | 0  | 2  | 6  | 9  | 2  | 4  | 15 | 14 | 14 | 9  | 7  | 7  |
| FBgn0004432 | 125 | 7  | 2  | 13 | 3  | 5  | 3  | 7  | 1  | 5  | 4  | 6  | 6  | 6  | 8  | 8  | 9  | 7  | 8  | 8  | 9  |
| FBgn0010516 | 121 | 4  | 2  | 9  | 9  | 6  | 4  | 3  | 3  | 3  | 2  | 7  | 11 | 3  | 7  | 7  | 15 | 7  | 12 | 1  | 6  |
| FBgn0001233 | 120 | 13 | 6  | 7  | 2  | 5  | 0  | 4  | 3  | 2  | 0  | 21 | 10 | 5  | 6  | 5  | 7  | 6  | 8  | 8  | 2  |
| FBgn0033268 | 120 | 15 | 13 | 6  | 5  | 8  | 2  | 2  | 1  | 2  | 0  | 17 | 11 | 8  | 5  | 6  | 5  | 4  | 6  | 4  | 0  |

|             |     |    |    |    |    |    |   |   |   |   |   |    |    |   |    |    |    |    |    |    |    |
|-------------|-----|----|----|----|----|----|---|---|---|---|---|----|----|---|----|----|----|----|----|----|----|
| FBgn0013334 | 119 | 11 | 5  | 6  | 3  | 6  | 4 | 3 | 2 | 1 | 7 | 13 | 12 | 2 | 8  | 5  | 9  | 6  | 6  | 7  | 3  |
| FBgn0000556 | 115 | 7  | 3  | 10 | 4  | 6  | 3 | 5 | 6 | 4 | 6 | 4  | 8  | 2 | 5  | 9  | 7  | 7  | 4  | 5  | 10 |
| FBgn0064779 | 112 | 6  | 9  | 8  | 7  | 2  | 4 | 1 | 1 | 1 | 0 | 10 | 8  | 5 | 10 | 10 | 9  | 5  | 5  | 4  | 7  |
| FBgn0036824 | 111 | 0  | 3  | 9  | 7  | 5  | 2 | 3 | 6 | 6 | 5 | 7  | 5  | 3 | 8  | 8  | 10 | 10 | 8  | 4  | 2  |
| FBgn0000150 | 110 | 10 | 3  | 9  | 4  | 3  | 4 | 1 | 8 | 1 | 1 | 11 | 5  | 6 | 7  | 6  | 10 | 7  | 8  | 4  | 2  |
| FBgn0021765 | 108 | 2  | 5  | 4  | 2  | 2  | 1 | 1 | 8 | 3 | 5 | 7  | 12 | 2 | 7  | 11 | 9  | 10 | 6  | 6  | 5  |
| FBgn0038570 | 107 | 4  | 5  | 13 | 0  | 7  | 6 | 5 | 3 | 6 | 2 | 6  | 6  | 6 | 6  | 6  | 9  | 8  | 4  | 5  | 0  |
| FBgn0004117 | 106 | 7  | 4  | 4  | 13 | 10 | 3 | 3 | 1 | 1 | 0 | 11 | 12 | 3 | 6  | 5  | 7  | 3  | 4  | 5  | 4  |
| FBgn0015221 | 104 | 15 | 3  | 11 | 8  | 5  | 3 | 2 | 0 | 1 | 1 | 4  | 5  | 0 | 3  | 5  | 9  | 7  | 5  | 7  | 10 |
| FBgn0036762 | 104 | 6  | 4  | 13 | 7  | 4  | 5 | 3 | 5 | 1 | 3 | 10 | 8  | 3 | 4  | 6  | 5  | 5  | 5  | 4  | 3  |
| FBgn0032946 | 104 | 10 | 10 | 5  | 3  | 6  | 3 | 3 | 4 | 2 | 3 | 8  | 12 | 1 | 4  | 4  | 3  | 9  | 8  | 6  | 0  |
| FBgn0036619 | 103 | 17 | 3  | 4  | 9  | 2  | 3 | 0 | 0 | 0 | 2 | 17 | 13 | 3 | 4  | 3  | 6  | 6  | 4  | 2  | 5  |
| FBgn0015245 | 96  | 4  | 1  | 5  | 5  | 4  | 4 | 1 | 1 | 0 | 2 | 12 | 4  | 0 | 4  | 5  | 9  | 4  | 12 | 6  | 13 |
| FBgn0000346 | 96  | 7  | 3  | 6  | 4  | 1  | 3 | 2 | 6 | 3 | 3 | 5  | 10 | 4 | 2  | 4  | 8  | 3  | 9  | 10 | 3  |
| FBgn0014869 | 95  | 5  | 7  | 6  | 4  | 4  | 2 | 2 | 1 | 2 | 5 | 12 | 6  | 5 | 5  | 5  | 8  | 7  | 4  | 3  | 2  |
| FBgn0031380 | 95  | 4  | 3  | 6  | 5  | 3  | 1 | 1 | 2 | 3 | 1 | 2  | 6  | 1 | 8  | 11 | 10 | 9  | 8  | 7  | 4  |
| FBgn0020368 | 94  | 9  | 1  | 7  | 4  | 4  | 1 | 3 | 4 | 2 | 1 | 9  | 4  | 4 | 8  | 3  | 11 | 9  | 3  | 2  | 5  |
| FBgn0001145 | 92  | 5  | 5  | 2  | 6  | 7  | 3 | 2 | 5 | 4 | 2 | 10 | 5  | 4 | 7  | 7  | 8  | 4  | 0  | 2  | 4  |
| FBgn0033835 | 90  | 8  | 3  | 4  | 4  | 3  | 0 | 1 | 3 | 1 | 3 | 12 | 4  | 4 | 6  | 3  | 8  | 6  | 7  | 3  | 7  |
| FBgn0034432 | 90  | 1  | 2  | 8  | 3  | 1  | 0 | 3 | 3 | 2 | 4 | 2  | 4  | 2 | 8  | 12 | 10 | 6  | 7  | 6  | 6  |
| FBgn0040074 | 88  | 2  | 5  | 7  | 6  | 2  | 1 | 0 | 2 | 3 | 3 | 7  | 12 | 5 | 4  | 5  | 5  | 5  | 6  | 3  | 5  |
| FBgn0017539 | 85  | 3  | 0  | 5  | 3  | 11 | 4 | 4 | 8 | 0 | 2 | 12 | 9  | 2 | 2  | 2  | 6  | 2  | 6  | 4  | 0  |
| FBgn0016691 | 85  | 1  | 3  | 4  | 3  | 6  | 2 | 1 | 0 | 3 | 1 | 7  | 5  | 5 | 10 | 7  | 11 | 5  | 5  | 3  | 3  |
| FBgn0033728 | 83  | 5  | 3  | 2  | 5  | 3  | 4 | 4 | 2 | 1 | 3 | 17 | 5  | 4 | 4  | 5  | 4  | 3  | 3  | 3  | 3  |
| FBgn0004363 | 83  | 11 | 6  | 6  | 5  | 3  | 3 | 3 | 1 | 1 | 0 | 12 | 10 | 3 | 4  | 1  | 1  | 5  | 5  | 2  | 1  |
| FBgn0015390 | 77  | 8  | 3  | 7  | 2  | 2  | 3 | 5 | 6 | 2 | 1 | 13 | 11 | 1 | 0  | 1  | 3  | 2  | 3  | 4  | 0  |
| FBgn0004580 | 76  | 2  | 3  | 7  | 1  | 4  | 2 | 3 | 1 | 3 | 2 | 11 | 5  | 2 | 4  | 6  | 4  | 6  | 5  | 2  | 3  |
| FBgn0002719 | 76  | 0  | 4  | 6  | 2  | 1  | 4 | 4 | 2 | 2 | 2 | 4  | 3  | 4 | 4  | 3  | 6  | 6  | 5  | 4  | 10 |
| FBgn0004873 | 68  | 9  | 1  | 4  | 2  | 1  | 3 | 4 | 2 | 0 | 2 | 11 | 8  | 2 | 1  | 1  | 1  | 6  | 4  | 1  | 5  |
| FBgn0002563 | 65  | 0  | 0  | 0  | 0  | 0  | 0 | 0 | 0 | 0 | 0 | 0  | 3  | 7 | 10 | 9  | 14 | 15 | 2  | 4  | 1  |
| FBgn0000261 | 60  | 8  | 1  | 3  | 1  | 1  | 2 | 1 | 1 | 1 | 1 | 11 | 9  | 1 | 2  | 4  | 0  | 3  | 3  | 5  | 2  |
| FBgn0003738 | 59  | 9  | 1  | 1  | 4  | 2  | 3 | 1 | 5 | 1 | 3 | 13 | 5  | 0 | 0  | 2  | 3  | 1  | 2  | 1  | 2  |

|             |    |    |   |    |   |   |   |   |   |   |   |    |    |   |   |   |   |   |   |    |   |
|-------------|----|----|---|----|---|---|---|---|---|---|---|----|----|---|---|---|---|---|---|----|---|
| FBgn0004625 | 57 | 3  | 2 | 10 | 4 | 1 | 0 | 2 | 2 | 0 | 0 | 9  | 4  | 3 | 2 | 3 | 3 | 0 | 2 | 3  | 4 |
| FBgn0020908 | 55 | 8  | 1 | 3  | 2 | 5 | 2 | 2 | 1 | 2 | 1 | 0  | 4  | 1 | 1 | 0 | 1 | 2 | 7 | 11 | 1 |
| FBgn0000559 | 52 | 15 | 2 | 4  | 3 | 1 | 2 | 1 | 1 | 1 | 2 | 6  | 2  | 2 | 1 | 2 | 1 | 2 | 0 | 2  | 2 |
| FBgn0000313 | 50 | 11 | 2 | 5  | 1 | 1 | 1 | 0 | 0 | 0 | 1 | 5  | 7  | 1 | 3 | 3 | 1 | 3 | 3 | 1  | 1 |
| FBgn0005666 | 49 | 4  | 2 | 10 | 1 | 2 | 8 | 3 | 0 | 0 | 4 | 5  | 3  | 0 | 0 | 2 | 0 | 0 | 3 | 0  | 2 |
| FBgn0017566 | 47 | 5  | 3 | 0  | 4 | 3 | 4 | 0 | 1 | 0 | 1 | 3  | 11 | 3 | 5 | 1 | 2 | 0 | 0 | 1  | 0 |
| FBgn0004551 | 38 | 2  | 2 | 6  | 0 | 2 | 4 | 2 | 1 | 0 | 0 | 4  | 13 | 0 | 0 | 0 | 0 | 0 | 1 | 1  | 0 |
| FBgn0033446 | 25 | 2  | 0 | 0  | 0 | 2 | 1 | 1 | 1 | 1 | 2 | 13 | 2  | 0 | 0 | 0 | 0 | 0 | 0 | 0  | 0 |
| FBgn0002565 | 24 | 9  | 0 | 0  | 0 | 0 | 0 | 0 | 0 | 0 | 0 | 15 | 0  | 0 | 0 | 0 | 0 | 0 | 0 | 0  | 0 |

<sup>a</sup> The total number of peptide hits detected from triplicate SCX-LC-MS/MS analyses is provided in this table.

<sup>b</sup> The Flybase gene number (FBgn no.) was obtained from Flybase and gi| accessions from the NCBI database are listed when FBgn no. was unavailable.

<sup>c</sup> The age of the animals in days since eclosure.

<sup>d</sup> The total number of raw peptide hits (before normalization) detected from proteins with at least 10 PH detected in any age sample.
